# Supplementary material for: Systems genetics of the Drosophila metabolome
Source: Genome Res. 2020 Mar;30(3):392–405. doi: 10.1101/gr.243030.118 (PMC7111526; doi:10.1101/gr.243030.118)
Supplement: Supplemental Material [file supp_gr.243030.118_Supplemental_Table_S1.xlsx.xlsx]

## Sheet: Sheet1
Supplemental Table S1. Metabolites identified by mass spectrometry with scaled measurement for each sample (* indicates compounds that have not been confirmed based on a standard ).
METABOLITE	SUPER PATHWAY	SUB PATHWAY	METABOLITE ID	PLATFORM	CHEMICAL ID	RETENTION INDEX	MASS	CAS	PUBCHEM	KEGG	CLIENT IDENTIFIER	41-F-1	41-F-2	41-F-3	42-F-1	42-F-2	42-F-3	45-F-1	45-F-2	45-F-3	59-F-1	59-F-2	59-F-3	83-F-1	83-F-2	83-F-3	91-F-1	91-F-2	91-F-3	129-F-1	129-F-2	129-F-3	158-F-1	158-F-2	158-F-3	177-F-1	177-F-2	177-F-3	195-F-1	195-F-2	195-F-3	208-F-1	208-F-2	208-F-3	217-F-1	217-F-2	217-F-3	229-F-1	229-F-2
1-(1-enyl-palmitoyl)-2-linoleoyl-GPC (P-16:0/18:2)*	Lipid	Plasmalogen	52682	LC/MS Pos Late	100009009	2226	742.575					0.0253	0.0253	0.0253	0.0253	0.0253	0.0253	0.0253	0.0253	0.0253	0.0253	0.0253	0.0253	0.0253	0.0253	0.0253	0.0253	0.0253	0.0253	0.0253	0.0253	0.0253	0.0253	0.0253	0.0253	0.0253	0.0253	0.0253	0.0253	0.0253	0.0253	0.0253	0.0253	0.0253	0.0253	0.0253	0.0253	0.0253	0.0253
1-(1-enyl-palmitoyl)-2-linoleoyl-GPE (P-16:0/18:2)*	Lipid	Plasmalogen	52677	LC/MS Pos Late	100009069	2351	700.528					0.4645	0.335	0.3169	0.7464	0.6601	0.109	0.2725	0.4081	0.3033	0.4236	0.4216	0.4685	0.4178	0.5812	0.547	0.5378	0.4862	0.4071	0.4513	0.8439	0.4777	0.3973	0.3803	0.1145	0.4749	0.5132	0.465	0.4911	0.3732	0.1946	0.4617	0.306	0.3044	0.3842	0.5186	0.153	0.2649	0.2896
1-(1-enyl-palmitoyl)-2-oleoyl-GPC (P-16:0/18:1)*	Lipid	Plasmalogen	52478	LC/MS Pos Late	100009007	2443	744.59					0.0408	0.0144	0.0144	0.0589	0.0782	0.0144	0.0144	0.0144	0.0144	0.0144	0.0144	0.0144	0.0144	0.0144	0.0144	0.0227	0.0144	0.0144	0.0144	0.0144	0.0144	0.0144	0.0144	0.0144	0.0539	0.0144	0.0144	0.0351	0.0144	0.0144	0.0647	0.0144	0.0144	0.0238	0.0144	0.0144	0.0144	0.0144
1-(1-enyl-palmitoyl)-2-oleoyl-GPE (P-16:0/18:1)*	Lipid	Plasmalogen	52477	LC/MS Pos Late	100009005	2600	702.543					0.0864	0.0626	0.1276	0.1051	0.1207	0.1812	0.0684	0.1083	0.1129	0.0833	0.1018	0.1098	0.028	0.028	0.0703	0.0779	0.1628	0.028	0.0795	0.2659	0.0532	0.0767	0.1319	0.1203	0.0661	0.1864	0.1201	0.1482	0.0895	0.3652	0.0614	0.0847	0.028	0.0584	0.028	0.132	0.028	0.0859
1-(1-enyl-palmitoyl)-2-palmitoleoyl-GPC (P-16:0/16:1)*	Lipid	Plasmalogen	52713	LC/MS Pos Late	100009160	2218	716.559					0.258	0.258	0.258	0.258	0.258	0.258	0.258	0.258	0.258	0.258	0.258	0.258	0.258	0.258	0.258	0.258	0.258	0.258	0.258	0.258	0.258	0.258	0.258	0.258	0.258	0.258	0.258	0.258	0.258	0.258	0.258	0.258	0.258	0.258	0.258	0.258	0.258	0.258
1-(1-enyl-palmitoyl)-GPE (P-16:0)*	Lipid	Lysoplasmalogen	39270	LC/MS Neg	100003000	6285	436.283					0.6869	0.772	0.4343	0.4172	0.3936	0.737	0.1057	0.1057	0.2083	0.4963	1.0929	0.4473	1.1755	0.6569	0.1057	0.6586	0.8511	0.6789	0.7978	2.0873	1.4391	0.3044	0.5367	0.4768	0.6328	0.5246	0.5031	0.7284	0.8354	0.282	0.4432	1.4079	1.1367	0.7165	1.1116	0.6372	0.4339	1.538
1-(1-enyl-stearoyl)-2-linoleoyl-GPE (P-18:0/18:2)*	Lipid	Plasmalogen	52748	LC/MS Pos Late	100009225	2633	728.559					0.8679	0.7355	0.6851	0.9024	0.9825	1.1047	0.9263	1.0077	0.9988	1.2725	1.0581	1.1012	0.6975	0.8436	0.9036	0.8816	0.833	0.8033	1.2172	1.1167	1.0595	1.0937	0.9663	1.0019	0.7202	0.8585	0.8695	1.1571	1.0868	0.993	0.9656	0.8558	0.8884	0.8356	0.9512	0.7354	0.8241	0.8809
1-(1-enyl-stearoyl)-2-oleoyl-GPE (P-18:0/18:1)	Lipid	Plasmalogen	52614	LC/MS Pos Late	100008919	2950	730.575	144371-68-6				1.1674	1.0805	1.1837	0.6389	0.6923	0.8803	1.104	1.0738	0.9387	1.2263	0.8646	1.0294	0.7466	0.8857	0.5939	0.7674	0.639	0.8953	1.1728	1.1667	0.9895	1.0353	1.0005	1.0869	0.8846	1.1055	1.0903	1.6053	1.4249	2.1545	0.8464	0.9109	0.7392	0.7481	0.7782	0.7647	0.698	0.8526
1-(1-enyl-stearoyl)-GPE (P-18:0)*	Lipid	Lysoplasmalogen	39271	LC/MS Pos Late	100003001	1649	466.329					1.4063	1.3764	1.6855	0.6382	0.7139	1.0765	0.5757	0.6488	0.6863	1.2412	1.6453	1.6673	1.2897	1.1659	1.4738	1.0911	1.1978	1.0595	2.0803	2.263	2.3663	1.0435	1.0069	1.2342	1.1973	1.5184	1.5925	1.5695	1.2365	1.6521	1.0665	2.0072	1.5622	1.0945	1.5137	1.5977	0.9987	2.3249
1,2-dilinoleoyl-galactosylglycerol (18:2/18:2)*	Lipid	Glycolipid Metabolism	54899	LC/MS Pos Late	100010879	2415	796.593		6535011			1.7849	4.6341	3.8083	2.7533	1.1529	4.734	3.1771	3.5747	1.9527	3.1692	3.052	2.301	3.3148	3.1263	2.5547	5.1447	4.822	6.2733	1.7129	4.0723	1.1473	1.8817	3.7604	2.3992	1.2483	7.2109	3.1832	3.975	3.1948	5.8493	1.9931	2.2664	6.7214	2.5018	1.9599	3.1303	3.6032	6.2926
1,2-dilinoleoyl-GPC (18:2/18:2)	Lipid	Phospholipid Metabolism	52603	LC/MS Pos Late	100008903	2006	782.569	998-06-1	5288075			1.8519	1.5506	1.5611	2.038	2.084	2.2797	1.5406	1.6293	1.4268	2.8559	3.2644	3.2957	2.755	2.4272	3.8315	2.2595	3.2809	3.5589	2.2064	2.3246	2.1301	1.9164	2.1319	2.2511	2.3505	3.5041	3.3471	2.6158	3.3178	3.7261	2.6738	2.5309	2.6881	2.0481	2.7252	2.4048	2.5144	3.3957
1,2-dilinoleoyl-GPE (18:2/18:2)*	Lipid	Phospholipid Metabolism	53174	LC/MS Pos Late	100009217	2083	740.522		9546812			1.8534	1.3459	1.3114	2.0408	2.313	2.4204	2.0249	2.0247	1.9933	3.6592	3.6785	3.8083	2.6843	2.1975	3.3994	2.528	2.9406	3.5199	2.4324	2.0221	1.9609	2.3651	2.1738	2.186	2.1905	2.5665	2.9532	2.7158	3.3208	3.5093	2.4454	2.0225	2.4245	2.1301	2.5299	2.0379	2.5818	2.6024
1,2-dioleoyl-GPC (18:1/18:1)*	Lipid	Phospholipid Metabolism	52457	LC/MS Pos Late	100008905	2346	786.601	4235-95-4	10350317			2.7371	2.2317	2.8335	2.0536	3.0627	2.7984	2.507	2.5172	2.463	2.8104	2.2366	2.7289	2.2853	1.7015	2.6913	2.1165	1.6156	2.211	2.4751	2.1465	2.4943	2.1264	1.413	1.8698	2.3051	2.1667	2.717	3.0448	3.3813	3.3717	3.1178	2.5895	3.7523	2.5744	2.5227	2.128	2.6684	2.1266
1,2-dioleoyl-GPE (18:1/18:1)	Lipid	Phospholipid Metabolism	52609	LC/MS Pos Late	100008906	2485	744.554	4004-05-01	9546757			1.9809	1.7392	1.8454	1.734	2.2949	2.5258	2.24	2.0812	2.061	2.5219	2.2334	2.385	1.7155	1.5179	2.2345	1.8523	1.5218	1.859	1.9362	1.6243	1.6608	1.8643	1.5087	1.8981	1.7407	1.7537	2.0686	2.7052	3.0528	3.3825	2.3052	2.0745	2.7481	1.6673	1.856	1.6503	1.7876	1.7073
1,2-dipalmitoleoyl-GPC (16:1/16:1)*	Lipid	Phospholipid Metabolism	52472	LC/MS Pos Late	100008997	1992	730.538					1.9953	1.4988	1.4871	1.0259	1.5277	1.7759	1.7958	1.7178	1.5081	2.8409	2.9474	2.6086	1.7224	1.3344	2.1353	1.5686	2.0584	1.8451	2.6191	2.5934	1.9308	1.5942	1.3846	1.9951	2.1054	2.8344	2.3949	2.2951	2.752	3.3934	2.0798	2.0198	1.778	1.7442	2.3794	2.2813	1.8152	1.8217
1,2-dipalmitoyl-GPC (16:0/16:0)	Lipid	Phospholipid Metabolism	19130	LC/MS Pos Late	100000657	2365	734.569	63-89-8	452110		HMDB00564	1.8861	1.7104	1.7991	1.4849	1.7005	1.8727	1.5121	1.5099	1.4373	1.958	1.9631	1.9156	1.7109	1.6458	2.0517	1.7515	2.0226	1.9234	2.0299	1.9467	1.7878	1.7447	1.6804	2.0155	1.4373	1.7012	1.8031	1.7025	1.8351	2.0349	1.9756	2.0234	2.2446	1.9446	1.9811	1.9047	1.9141	2.4802
10-heptadecenoate (17:1n7)	Lipid	Long Chain Fatty Acid	33971	LC/MS Neg	100001278	5555	267.233	29743-97-3	5312435		HMDB60038	1.521	0.9939	0.6274	0.9947	1.4685	1.8158	1.0124	1.0099	1.4243	1.1531	1.0705	0.5974	0.7886	0.7068	0.3358	0.9567	1.0729	0.9618	0.954	1.2837	0.7758	0.8931	0.9916	0.8893	1.4703	1.2837	1.0599	0.955	0.6568	0.4632	1.0325	1.0395	1.3072	0.7725	0.6453	0.4117	1.1508	0.8694
10-nonadecenoate (19:1n9)	Lipid	Long Chain Fatty Acid	33972	LC/MS Neg	100001277	5780	295.264	73033-09-7	5312513		HMDB13622	1.3923	2.286	1.0694	1.1231	1.4015	2.3882	1.0376	0.9981	1.2486	0.7955	0.7535	0.4483	1.3081	1.1888	0.4494	1.133	1.1242	1.266	1.0677	1.5536	0.9864	1.0043	1.2266	0.8221	1.2078	1.6001	1.0659	0.9375	1.4243	0.4841	0.9905	1.0248	1.384	0.8001	0.6036	0.4831	1.2491	0.9855
12,13-DiHOME	Lipid	Fatty Acid, Dihydroxy	38395	LC/MS Neg	62	5137	313.238	263399-35-5	10236635	C14829	HMDB04705	1.0074	0.6342	0.9349	1.2168	0.7803	0.8241	1.3709	1.15	1.3615	1.0176	1.3677	0.7618	1.737	1.1575	1.5301	0.9101	1.0571	0.9515	1.3124	1.7061	1.4088	1.0483	1.0249	1.1183	1.9225	1.8152	2.0162	0.9884	0.7854	1.1697	1.4666	1.152	1.4573	0.8437	1.0664	1.0261	1.0224	1.1671
13-HODE + 9-HODE	Lipid	Fatty Acid, Monohydroxy	37752	LC/MS Neg	100002196	5275	295.228		43013			0.7767	0.7432	0.8061	1.3244	1.0757	1.2072	1.1184	0.5437	0.7066	0.664	0.7965	1.0334	1.5018	1.0935	0.8717	1.2637	1.1302	0.734	0.8938	0.8125	0.6084	0.7989	0.723	0.8033	1.1426	0.5635	0.9626	1.0029	0.4717	0.6057	0.8389	0.4841	0.6961	0.9234	0.8485	1.0769	0.9883	1.0241
13-methylmyristate	Lipid	Fatty Acid, Branched	38293	LC/MS Neg	100002344	5499	241.217	2485-71-4	151014			1.12	1.2061	0.6121	0.2209	0.2209	0.4556	0.8427	0.9413	1.1299	1.4954	2.1589	1.2767	0.6144	0.6421	0.2209	0.9876	1.1078	1.0597	0.7308	0.7458	0.5416	0.2209	0.717	0.4445	1.5108	1.6292	1.2168	0.853	0.8582	0.5735	0.7611	1.19	1.2111	0.2209	0.4638	0.36	0.6089	0.4232
15-methylpalmitate	Lipid	Fatty Acid, Branched	38768	LC/MS Neg	100002945	5695	269.249		17903417			1.2624	1.2893	0.7026	0.635	0.7575	0.7422	1.0589	1.0826	1.4797	1.274	1.9381	0.9523	0.777	0.8583	0.1698	1.1238	1.3711	1.547	0.7836	0.9741	0.7146	0.8614	1.0708	0.6245	1.4734	1.7179	1.4312	0.9365	0.9649	0.4859	1.0544	1.4145	1.6312	0.7064	0.572	0.3297	0.988	0.6812
16-hydroxypalmitate	Lipid	Fatty Acid, Monohydroxy	39609	LC/MS Neg	100002953	5236.2	271.228	506-13-8	10466	C18218	HMDB06294	0.0952	0.8818	0.0952	0.612	0.1701	0.8559	0.5422	0.8489	0.9161	0.7736	0.8211	0.75	1.0684	0.9288	0.7666	1.2768	1.1686	0.9621	1.2824	1.1221	0.7214	0.9917	1.0933	0.7952	0.548	1.0458	0.41	1.0462	0.0952	0.0952	0.7301	0.9885	0.0952	1.048	1.1607	0.0952	0.0952	0.0952
17-methylstearate	Lipid	Fatty Acid, Branched	38296	LC/MS Neg	100002356	5993	297.28	2724-59-6	3083779			1.1828	1.2743	0.7448	0.6424	0.6454	0.9404	1.1498	1.1649	1.4795	1.2269	1.5043	0.789	0.7129	0.6569	0.2529	1.0855	1.523	1.5614	0.8368	1.1339	0.685	0.792	0.9872	0.629	1.621	1.7831	1.3238	0.8687	0.8823	0.5721	1.0936	1.1304	1.3885	0.5971	0.4986	0.3281	0.6923	0.6712
1-kestose	Xenobiotics	Food Component/Plant	22012	LC/MS Polar	100000980	3970	549.167	470-69-9	440080	C03661	HMDB11729	0.6127	0.1767	1.1394	1.965	0.9924	0.6262	1.3541	1.2076	0.9207	1.6436	2.9835	1.132	2.0912	1.2859	1.4125	3.5038	1.6816	1.5728	0.8943	1.3047	0.3481	1.9748	1.9973	1.7568	1.5939	1.3138	0.6685	0.8703	0.4047	0.7754	0.2768	0.1767	0.526	0.7651	1.0078	0.9067	1.9887	1.6775
1-linolenoyl-GPC (18:3)*	Lipid	Lysolipid	45951	LC/MS Pos Late	100005350	1422	518.324					1.0558	2.5575	0.7417	1.7189	2.1623	1.2497	3.2063	3.9632	1.206	2.9624	1.292	1.0358	2.8933	3.7815	0.6858	3.1019	0.5074	1.0838	2.6769	0.9398	1.462	4.4014	1.6259	1.0035	0.9331	0.3899	0.5336	1.2238	1.6168	0.6702	1.9846	1.2013	1.1489	2.8661	0.5549	0.8374	2.2689	1.7597
1-linoleoyl-2-linolenoyl-galactosylglycerol (18:2/18:3)*	Lipid	Glycolipid Metabolism	54898	LC/MS Pos Late	100010878	2209	794.578					1.8346	4.431	1.8724	2.0497	1.0962	1.7074	1.9587	2.6174	0.3927	1.9872	1.0534	0.6836	2.736	3.2179	0.9604	3.6276	2.2101	2.06	1.4967	1.7533	0.462	1.5632	1.6464	2.3014	1.578	3.8859	1.0477	3.0399	2.6652	6.2643	1.3459	0.96	2.0658	1.9207	0.9586	6.4767	2.634	2.1836
1-linoleoyl-2-linolenoyl-GPC (18:2/18:3)*	Lipid	Phospholipid Metabolism	53176	LC/MS Pos Late	100009343	1939	780.554					2.6342	1.8182	1.3382	2.2748	2.2651	1.5459	1.5239	1.9105	0.8961	4.0927	2.6794	2.3079	3.8233	3.1776	2.3987	3.4399	2.8815	2.5339	3.2144	2.1742	1.6639	2.2569	1.7829	1.6907	3.2723	2.8961	2.4166	3.3707	5.1892	3.5307	3.1466	2.1249	1.8949	2.6705	2.1974	2.864	3.6056	2.938
1-linoleoylglycerol (18:2)	Lipid	Monoacylglycerol	27447	LC/MS Neg	100001040	6477	279.233	2277-28-3	5283469			1.7213	1.7831	1.7389	1.7681	1.9345	2.9635	2.8371	3.0081	2.8751	1.8275	1.1121	1.7475	1.5407	2.31	1.0664	2.047	1.161	3.7205	1.3616	1.3045	2.2496	2.4214	2.2779	2.505	1.0865	0.9992	2.5257	1.1835	2.5116	1.5084	1.8563	0.9838	3.2863	2.281	0.9977	0.72	2.5008	2.649
1-linoleoyl-GPA (18:2)*	Lipid	Lysolipid	52690	LC/MS Neg	100009082	5483	433.236				HMDB07856	3.3622	7.1041	2.2139	6.6056	6.1298	1.9306	8.1123	9.681	3.7462	5.1489	0.0818	2.3108	0.7613	8.8975	1.7149	4.2167	1	2.4091	4.2486	0.8108	1.719	7.2826	2.3951	2.8429	1.1655	0.7727	2.2304	2.5738	7.6772	1.9912	5.3525	0.2636	2.8114	7.8297	0.4586	1.0912	7.0992	0.0818
1-linoleoyl-GPC (18:2)	Lipid	Lysolipid	34419	LC/MS Pos Late	100001395	1465	520.34		11988421	C04100	HMDB10386	1.8989	4.4776	2.0688	3.6578	4.6279	4.0554	5.6645	5.8746	3.9132	5.1844	4.4054	3.3051	5.4416	6.1704	2.5807	5.5197	2.3945	3.3759	4.9651	3.9724	4.3384	6.8967	6.8446	3.2181	1.6699	1.5678	2.0509	2.4282	3.4647	1.871	4.3084	4.5904	3.4953	4.9364	2.7169	2.4503	4.4545	6.5375
1-linoleoyl-GPE (18:2)*	Lipid	Lysolipid	36600	LC/MS Pos Late	100001570	1482	478.293		52925130		HMDB11507	1.8178	3.4949	2.3986	3.0078	4.1474	4.6482	4.9866	5.1394	4.5379	4.0044	5.1833	4.4729	4.2131	4.7362	2.4576	4.7685	2.78	3.5675	3.4911	3.69	4.2517	6.1265	5.835	3.8848	1.5727	1.5562	1.5561	2.2117	2.4729	1.8415	3.5753	4.7794	3.8185	4.3012	2.7801	2.7901	3.2388	5.4577
1-linoleoyl-GPG (18:2)*	Lipid	Lysolipid	54885	LC/MS Neg	100009227	5516	507.273					1	1.0206	1.1529	1.3144	1.2536	9.4101	2.47	2.1635	5.7291	2.9086	7.6376	3.4793	1.5677	0.8464	0.9543	1.5264	2.7637	2.3885	1.4457	5.2903	4.1784	3.222	10.7237	4.5432	0.5002	1.4218	1.0457	0.554	0.687	1.888	1.2706	6.6509	4.1434	1.5982	3.3439	2.3771	1.444	7.7765
1-linoleoyl-GPI (18:2)*	Lipid	Lysolipid	36594	LC/MS Neg	100001778	5494	595.289					2.6209	2.9725	2.3617	2.5696	2.5657	6.4549	3.6616	3.7946	5.3991	2.8858	3.7435	2.3578	2.6974	2.1763	1.6557	3.261	3.252	3.15	3.2702	5.0343	4.3336	4.4513	6.1573	5.2742	1.7259	2.4402	2.591	1.5329	1.6844	2.7051	2.4974	5.0385	4.0598	3.2021	3.7357	2.9951	2.4175	5.6176
1-linoleoyl-GPS (18:2)*	Lipid	Lysolipid	43676	LC/MS Neg	100004606	5500	520.268					0.6195	1.0883	0.9387	1.3248	1.4015	3.0277	1.5656	1.4228	2.6308	1.0144	1.4251	1.1516	0.9883	1.2862	0.741	0.9777	1.2471	1.7395	1.0578	1.9111	2.0232	1.8641	3.0108	2.3594	0.422	0.6501	0.998	0.5621	0.5479	0.8825	0.7195	1.5977	1.8	1.5671	1.4513	1.6336	1	1.1809
1-methyladenine	Nucleotide	Purine Metabolism, Adenine containing	1527	LC/MS Pos Early	54	2133	150.077	5142-22-3	78821	C02216	HMDB11599	1.6732	1.3775	1.2255	0.901	0.886	0.8802	0.8032	0.9654	0.9796	1.0009	1.0134	1.3828	0.6235	0.8853	0.9429	0.4757	0.4764	0.4739	1.1408	1.1291	1.1246	0.8301	0.7939	0.8563	0.46	0.5497	0.6746	0.5153	0.653	0.6632	0.6487	0.482	0.6253	1.6564	1.19	1.7357	0.9608	0.5214
1-methylhistamine	Amino Acid	Histidine Metabolism	43831	LC/MS Pos Early	100001204	3040	126.103	501-75-7	3614	C05127	HMDB00898	0.7464	0.5716	0.6201	0.2394	0.9806	0.9565	0.1021	0.1021	0.3358	1.4693	1.1117	1.9967	0.1021	0.1021	0.5632	2.0767	2.7667	2.6785	0.8428	0.7954	0.8104	0.3628	0.6114	0.6256	0.5304	0.547	0.7062	0.8023	1.4359	0.712	0.6323	0.6321	0.4289	0.6306	0.5511	0.4497	0.9213	0.9985
1-methylhistidine	Amino Acid	Histidine Metabolism	30460	LC/MS Pos Early	100001051	2755	170.092	332-80-9	92105	C01152	HMDB00001	1.0287	0.8785	0.8114	0.909	0.8696	0.8855	0.7855	0.8928	0.8287	0.8045	0.8356	1.0377	0.7663	1.0702	0.9607	0.9559	1.0767	1.0674	0.9529	0.934	1.0059	0.9945	0.9198	0.8244	0.601	0.852	0.858	0.8424	0.9382	0.7351	1.0112	0.9647	1.0222	0.9271	0.814	0.8693	0.8527	0.8114
1-methylimidazoleacetate	Amino Acid	Histidine Metabolism	32350	LC/MS Pos Early	100001208	2064	141.066	2625-49-2	75810	C05828	HMDB02820	0.8614	0.6395	0.4056	1.3997	0.9948	0.4252	0.9658	0.4056	1.4106	1.0206	1.4115	1.1722	1.0437	1.6379	2.357	1.3095	0.4056	0.9011	1.142	0.8857	1.1357	1.0567	0.4056	0.8242	0.4056	0.679	0.9145	0.4056	1.1096	0.8508	1.0052	1.3644	1.2276	0.4056	0.5425	0.4056	1.9885	1.7608
1-methylurate	Xenobiotics	Xanthine Metabolism	34395	LC/MS Neg	100001400	1099	181.037	708-79-2	69726	C16359	HMDB03099	0.8836	0.756	0.9318	0.648	0.6597	0.6002	0.8585	0.6742	1.0011	0.7011	0.7417	0.905	0.6001	0.5459	0.6571	0.7954	0.6692	0.6361	0.7808	0.9016	0.7816	0.85	0.8509	0.7289	0.4637	0.4881	0.5544	0.7871	0.6085	0.7766	0.5793	0.872	0.5408	0.7447	0.9031	0.6892	0.9425	1.4143
1-oleoyl-2-linoleoyl-glycerol (18:1/18:2)	Lipid	Diacylglycerol	46798	LC/MS Pos Late	100002989	3115	636.556	106292-55-1				1.1392	0.9884	0.7296	0.8012	1.1693	1.9935	0.9094	0.8253	1.2312	1.2383	1.0514	1.0133	1.4355	2.0544	2.4624	0.8877	1.2801	1.2204	0.9362	0.9402	0.9682	1.2381	2.0091	2.4033	1.0903	1.1637	0.9571	1.5814	1.6455	1.4296	1.8504	1.1231	1.4038	0.9529	0.9503	1.192	1.2785	2.2932
1-oleoyl-2-linoleoyl-GPC (18:1/18:2)*	Lipid	Phospholipid Metabolism	52453	LC/MS Pos Late	100008981	2165	784.585					1.8467	1.7276	2.0596	1.7744	2.1374	2.5351	1.6793	1.6682	1.8343	2.2663	2.3716	3.1439	2.1928	1.9002	3.5867	1.7806	1.9427	2.758	2.3222	2.114	2.5675	1.7024	1.5453	2.1194	1.6678	2.1594	3.0546	2.52	3.0143	3.7629	2.5373	2.3311	3.2609	1.8868	2.2803	2.3239	2.2193	2.417
1-oleoyl-2-linoleoyl-GPE (18:1/18:2)*	Lipid	Phospholipid Metabolism	52687	LC/MS Pos Late	100009078	2270	742.538		9546753		HMDB05349	1.7289	1.473	1.445	1.7869	2.0555	2.5507	1.9095	1.839	1.8445	2.6278	2.3881	2.6818	1.9229	1.7979	2.6172	1.7934	1.6891	2.2258	2.0502	1.5606	1.8522	1.8907	1.6178	1.9926	1.7037	1.7389	2.1932	2.5024	2.9789	3.3424	2.4195	1.8333	2.4602	1.7539	1.7587	1.7215	1.993	1.7674
1-oleoyl-2-linoleoyl-GPI (18:1/18:2)*	Lipid	Phospholipid Metabolism	52451	LC/MS Polar	100008979	902	859.534					1.9511	1.9938	1.5693	1.9096	1.7128	2.0522	1.7102	1.6554	1.563	2.5023	2.3219	1.8741	2.3461	1.8028	1.9944	2.1286	2.0583	1.5003	2.8133	2.8933	2.0489	2.1005	1.8431	1.895	2.1171	2.3844	1.9611	2.4817	2.6552	2.5518	2.0325	2.2926	2.0555	1.9669	2.4735	2.1408	1.9827	2.5719
1-oleoyl-3-linoleoyl-glycerol (18:1/18:2)	Lipid	Diacylglycerol	46799	LC/MS Pos Late	100002990	3223	636.556	104346-53-4				1.4503	1.1135	1.1498	1.0404	1.5728	2.2508	1.1729	1.2518	1.5766	1.7878	1.4004	1.6225	1.8276	2.1708	2.6521	1.4277	1.5966	1.4946	1.3308	1.4637	1.3914	1.842	2.3633	2.7165	1.3393	1.538	1.6132	1.8105	2.1602	1.8744	2.0213	1.7732	1.9251	1.451	1.3048	1.75	1.4296	2.3458
1-oleoyl-GPA (18:1)	Lipid	Lysolipid	36812	LC/MS Neg	100001671	5615	435.252	325465-93-8	5497152			1.2361	1.4348	2.2876	1.8279	1.5803	0.0528	2.2339	2.8764	1.8905	1	0.0528	0.7805	0.0528	1.2204	1.0534	0.6747	0.339	0.4489	0.8225	0.3416	0.6226	1.3727	1.1363	2.0143	0.2381	0.4024	0.0528	0.6896	1.3859	1.4433	1.1924	0.0528	1.832	2.012	0.0528	0.0528	1.3273	0.0528
1-oleoyl-GPC (18:1)	Lipid	Lysolipid	48258	LC/MS Pos Late	100001272	1540	522.355	19420-56-5	16081932		HMDB02815	2.658	5.0609	3.2163	3.4268	5.3753	4.1507	6.0039	6.3818	4.8557	3.8156	3.8187	2.8778	4.0336	5.2639	2.2866	4.1239	2.3017	2.8431	4.6809	4.3644	3.9304	5.9785	5.4282	3.3998	1.5968	1.4552	1.6455	3.149	3.5457	1.8462	4.7217	5.1319	4.3861	5.1366	2.8544	2.7308	3.9182	4.8902
1-oleoyl-GPE (18:1)	Lipid	Lysolipid	35628	LC/MS Pos Late	100001569	1554	480.308	89576-29-4	9547071		HMDB11506	2.0927	3.4802	2.6418	2.7199	3.5967	3.5839	4.0436	4.2719	3.6582	3.205	3.9677	3.3091	3.1533	3.315	2.1617	3.1585	1.4571	2.0746	3.2109	2.2212	3.2962	4.0494	3.1	2.8525	1.3331	1.4594	1.3685	2.22	2.5232	1.7955	3.3056	2.9484	3.6823	2.9854	1.6144	2.0896	2.8218	2.9316
1-oleoyl-GPG (18:1)*	Lipid	Lysolipid	45968	LC/MS Neg	100005716	5610	509.288					0.6719	0.8034	0.6133	0.7784	0.8567	2.4453	1.5838	1.1853	1.688	1.4311	1.9478	0.8556	0.9306	0.511	0.1663	0.8065	0.6357	0.5981	1.0793	1.6158	1.1019	1.2989	1.8086	1.0853	0.279	0.3265	0.2643	0.5654	0.6809	0.6202	1.0141	1.9156	1.7043	1.0164	1.0836	0.5498	0.9974	2.0308
1-oleoyl-GPI (18:1)*	Lipid	Lysolipid	36602	LC/MS Neg	100001777	5599	597.305					1.2346	1.1334	3.5613	0.9348	1.0274	5.4996	1.3735	1.4758	6.2023	0.843	2.949	1.6442	0.8202	0.6577	0.8792	1.0977	3.8177	3.0862	1.0026	5.1967	4.2214	1.6002	7.0928	5.7119	0.5536	1.9773	1.9688	0.7258	0.5682	2.5575	1	5.2541	4.8122	0.9234	3.4187	2.1598	0.8582	5.3626
1-oleoyl-GPS (18:1)	Lipid	Lysolipid	19260	LC/MS Pos Late	100000630	1555	524.298		9547099			1.4728	2.2494	1.6622	2.6205	2.9557	6.1222	2.7116	2.6262	2.7441	1.4979	0.0726	0.0726	2.4251	3.1987	1.5555	1.7766	1.209	1.1089	1.3908	1.6529	1.848	2.6342	2.8058	3.8479	0.9781	1	1.0056	1.3889	1.1003	1.4564	1.7269	0.8675	0.0726	2.3163	1.5149	3.3677	1.8053	2.099
1-palmitoleoyl-2-linolenoyl-GPC (16:1/18:3)*	Lipid	Phospholipid Metabolism	53180	LC/MS Pos Late	100009345	1850	754.538					2.9619	1.8882	0.8327	1.6664	2.0131	0.9867	1.6344	2.0957	0.5792	4.0272	1.4522	1.4402	2.88	2.3709	1.3992	2.8771	1.254	1.3547	3.8399	1.2052	1.0242	2.1488	0.6036	1.0561	2.7483	1.3807	1.2997	3.3127	5.0202	2.16	3.1684	1	1.0768	2.2885	1.0092	1.092	2.9654	1.1885
1-palmitoleoyl-2-linoleoyl-GPC (16:1/18:2)*	Lipid	Phospholipid Metabolism	52683	LC/MS Pos Late	100009075	2003	756.554					2.1107	1.6725	1.6536	1.4167	1.8194	2.2612	1.6986	1.7332	1.5649	2.8611	2.7266	3.1543	2.1258	1.7635	2.7651	1.9031	2.2211	2.5449	2.6854	2.3248	2.2188	1.6949	1.4307	2.3622	2.0893	2.706	2.897	2.4708	3.0491	3.7464	2.4889	2.0616	2.3991	1.9785	2.2733	2.6315	2.1454	2.127
1-palmitoleoyl-2-oleoyl-glycerol (16:1/18:1)*	Lipid	Diacylglycerol	52632	LC/MS Pos Late	100009053	3035	610.541		9543694		HMDB07131	1.5828	1.9183	1.6084	0.732	1.1691	1.5832	1.0669	1.0108	1.5798	1.127	1.1194	1.2851	1.5177	1.5869	1.6945	1.1402	1.5326	1.4059	1.2118	1.1045	1.048	1.5629	2.3781	1.9249	1.1785	1.8201	1.6895	1.5438	1.5327	1.4563	1.3007	1.1146	1.4004	1.5035	1.2838	1.7697	1.3079	1.5108
1-palmitoleoyl-3-oleoyl-glycerol (16:1/18:1)*	Lipid	Diacylglycerol	52631	LC/MS Pos Late	100009054	3154	610.541					2.6041	2.5278	2.5318	1.1766	1.4594	2.1078	2.0508	1.4635	2.2679	2.4191	1.9523	2.2804	2.1589	1.7935	2.2019	2.4336	1.9884	1.9767	2.1594	1.9454	1.5723	2.9778	3.2646	2.4806	1.566	1.8863	2.5603	2.2359	2.1234	1.7299	2.2264	1.9426	1.904	3.0174	2.2145	2.7813	1.9123	1.9435
1-palmitoleoyl-GPC (16:1)*	Lipid	Lysolipid	33230	LC/MS Pos Late	100001511	1450	494.324		24779461		HMDB10383	2.7479	6.122	2.6004	2.2901	3.7833	3.1767	7.6678	8.3878	5.4232	5.5783	3.6522	3.6703	4.092	4.7479	1.8168	4.5626	1.5711	3.148	6.0032	3.4663	5.1132	7.9869	4.3069	3.4253	1.5373	1	1.6101	2.4835	2.9316	1.773	4.5083	3.8658	4.3235	5.2912	1.9942	2.8803	3.9681	3.3167
1-palmitoyl-2-linolenoyl-galactosylglycerol (16:0/18:3)*	Lipid	Glycolipid Metabolism	54900	LC/MS Pos Late	100010894	2455	770.578					0.0644	0.0644	0.0644	0.0644	0.0644	0.0644	0.0644	0.0644	0.0644	0.0644	0.0644	0.0644	0.0644	0.0644	0.0644	0.0644	0.0644	0.0644	0.0644	0.0644	0.0644	0.0644	0.0644	0.0644	0.0644	0.0644	0.0644	0.0644	0.4108	0.0644	0.0644	0.0644	0.0644	0.0644	0.0644	0.0644	0.0644	0.0644
1-palmitoyl-2-linoleoyl-galactosylglycerol (16:0/18:2)*	Lipid	Glycolipid Metabolism	54901	LC/MS Pos Late	100010893	2731	772.593					0.0851	0.0469	0.0469	0.2186	0.1755	0.4514	0.0469	0.0469	0.0469	0.2454	0.0469	0.0469	0.0972	0.0988	0.0469	0.3355	0.1505	0.0469	0.1397	0.455	0.0773	0.1386	0.0469	0.1092	0.0536	0.6164	0.0469	0.0469	0.0469	0.4188	0.0469	0.0469	0.2344	0.0469	0.0469	0.2135	0.3002	0.0469
1-palmitoyl-2-linoleoyl-glycerol (16:0/18:2)*	Lipid	Diacylglycerol	52633	LC/MS Pos Late	100009052	3080	610.541		9543695		HMDB05207,HMDB07103	1.0398	1.2328	0.6187	0.6135	1.1665	2.0714	0.6457	0.8586	1.4808	0.8906	0.5506	0.7268	1.6091	3.1865	3.0962	0.9335	1.647	1.5263	0.8157	0.8686	1.0004	1.1431	2.6767	2.3006	1.2	1.6703	1.3134	1.3898	2.0643	1.5864	1.2911	0.8807	0.9005	0.7752	0.8345	1.1822	0.8646	2.111
1-palmitoyl-2-linoleoyl-GPC (16:0/18:2)	Lipid	Phospholipid Metabolism	42446	LC/MS Pos Late	1537	2160	758.569	40811-94-7	5287971			1.8078	1.5514	1.7603	1.4607	1.8254	2.2751	1.4969	1.5222	1.551	2.4099	2.4251	2.9845	1.9517	1.7234	2.978	1.7914	2.177	2.6269	2.3494	2.2405	2.4186	1.6522	1.5064	2.171	1.8349	2.3965	2.9422	2.3132	2.7352	3.5777	2.2258	2.1383	2.5897	1.8094	2.1902	2.4836	2.0542	2.222
1-palmitoyl-2-linoleoyl-GPE (16:0/18:2)	Lipid	Phospholipid Metabolism	42449	LC/MS Pos Late	100001870	2275	716.522		9546747		HMDB05322	1.1552	1.024	1.439	1.5662	1.7641	3.1068	1.4218	1.4896	1.4563	2.4113	2.8933	3.204	2.0955	2.0783	2.779	1.7815	2.1322	2.6943	2.0205	2.1314	2.2293	1.6822	1.7928	2.5247	1.5877	2.0841	2.5311	1.9887	2.448	2.7723	1.7026	1.2169	2.3031	1.4071	1.9924	1.6003	1.6217	1.909
1-palmitoyl-2-linoleoyl-GPI (16:0/18:2)	Lipid	Phospholipid Metabolism	52450	LC/MS Polar	1528	910	833.518					1.8253	1.9233	1.4903	1.4697	1.5563	1.7097	1.5817	1.5139	1.5391	2.4294	2.1664	2.1913	1.8036	1.4611	1.8868	2.0115	1.9639	1.5903	2.688	2.5151	2.2693	1.8647	1.7606	1.892	2.1716	2.5865	2.5478	2.1223	2.5065	2.5438	1.9507	1.982	1.8055	2.0129	2.4343	2.0431	1.9344	2.324
1-palmitoyl-2-oleoyl-GPC (16:0/18:1)	Lipid	Phospholipid Metabolism	52461	LC/MS Pos Late	1539	2358	760.585	26853-31-6;26853-31-6	6436017			2.1439	1.8816	2.1885	1.485	2.1547	2.3185	1.8072	1.9711	2.0991	2.4669	1.9714	2.8978	1.9099	1.7122	2.8403	1.841	1.7579	2.4766	2.8842	2.3505	3.0374	1.9624	1.4702	2.1482	1.9338	1.9945	2.9503	2.5103	3.1538	3.128	2.6507	2.1916	3.303	1.9347	1.9035	2.0375	2.0536	2.2106
1-palmitoyl-2-oleoyl-GPE (16:0/18:1)	Lipid	Phospholipid Metabolism	19263	LC/MS Pos Late	1526	2509	718.538	26662-94-2	5283496		HMDB05320	1.6749	1.5196	1.5276	1.4649	1.8288	2.2023	1.6944	1.7809	1.6532	2.5119	2.2286	2.4551	1.7073	1.6694	2.0786	1.773	1.655	1.8618	2.3875	1.8957	1.931	1.7054	1.4321	1.8674	1.6334	1.7833	1.9137	2.3582	2.675	2.8878	2.0249	1.6554	2.0227	1.548	1.6548	1.6965	1.795	1.6978
1-palmitoyl-2-palmitoleoyl-GPC (16:0/16:1)*	Lipid	Phospholipid Metabolism	52470	LC/MS Pos Late	100008984	2160	732.554					1.4052	1.186	1.2057	0.8052	1.1433	1.2386	1.1856	1.1675	1.1701	1.6541	1.8066	1.879	1.1029	0.97	1.5048	1.1391	1.5713	1.5477	1.8179	1.9255	1.7142	1.208	1.0585	1.3137	1.2512	1.8244	1.713	1.5208	1.81	2.0148	1.5159	1.6458	1.5905	1.1646	1.5456	1.3096	1.2944	1.4027
1-palmitoyl-2-stearoyl-GPC (16:0/18:0)	Lipid	Phospholipid Metabolism	52616	LC/MS Pos Late	100008921	2653	762.601	59403-51-9				1.9977	1.8495	1.1514	1.3742	1.6894	0.7089	1.6453	1.754	0.7958	2.2457	0.0874	0.9501	1.7785	1.7533	1.7373	1.6744	0.7221	0.6858	2.4489	1.286	1.3999	2.0062	0.8772	0.903	1.6799	1.1429	1.3985	1.9576	2.2934	1.0762	2.1244	0.9811	1.2878	2.1957	1.0704	0.9659	1.9093	1.4088
1-palmitoyl-3-linoleoyl-glycerol (16:0/18:2)*	Lipid	Diacylglycerol	52634	LC/MS Pos Late	100009055	3197	610.541					1.803	1.6396	1.1541	1.2418	1.9216	2.3305	1.3585	1.7341	1.9662	2.114	1.4592	1.8722	2.4598	3.2045	2.9805	1.9515	2.5431	2.0363	2.1595	2.3674	1.9163	2.3196	3.5831	2.9042	1.7703	2.1916	2.2333	2.1623	2.7337	2.1831	1.8438	1.8087	1.6511	1.777	1.6198	2.1135	1.506	2.7898
1-palmitoyl-GPA (16:0)	Lipid	Lysolipid	34428	LC/MS Neg	100001445	5600	409.236	17618-08-5	6419701	C04036	HMDB00327	1.5369	3.6759	2.4146	2.1823	1.5829	0.0921	1.661	2.3514	1.4124	1.5341	0.0921	1.5277	0.0921	1.8114	1.1976	1.2956	0.7371	1.0796	1.6699	0.4958	1.7163	1.4336	0.8372	1.4839	0.4993	0.819	1.6716	0.9672	3.7244	1.1434	1.7217	0.0921	1.6423	2.8301	0.0921	0.7409	1.9921	0.0921
1-palmitoyl-GPC (16:0)	Lipid	Lysolipid	33955	LC/MS Pos Late	100001263	1525	496.34	17364-16-8	86554		HMDB10382	2.4304	4.1907	2.4653	2.2587	2.9912	2.501	2.7134	3.085	1.9657	2.9611	2.8951	2.7524	3.5845	3.6422	2.0088	3.6738	1.7932	1.6659	4.2054	3.0195	3.6277	3.6136	2.2241	2.4078	1.8207	1.4318	1.5222	2.2699	3.291	1.7798	4.0379	3.3933	3.1786	3.7174	1.8673	2.232	3.0497	3.4146
1-palmitoyl-GPE (16:0)	Lipid	Lysolipid	35631	LC/MS Neg	100001567	6057.2	452.278		9547069		HMDB11503	2.5104	3.2009	3.2339	1.7584	2.5773	4.1801	2.6104	1.9515	2.9006	4.6606	8.6704	4.6197	4.2017	1.8742	1.1448	4.2432	4.0096	3.5508	5.3951	7.9538	7.6569	2.8477	4.6075	3.5574	2.7036	2.6355	2.3996	2.5117	4.5617	2.5431	3.2492	8.4393	6.8816	4.4501	4.3814	2.8209	3.8722	9.019
1-palmitoyl-GPG (16:0)*	Lipid	Lysolipid	45970	LC/MS Neg	100005717	5570	483.273		3300276			1.869	2.2352	2.5233	0.9597	1.3782	3.9516	1.4255	1.238	3.0105	2.0919	5.1897	2.8657	2.5616	1.1171	1.2023	1.6883	3.3341	2.6119	2.3271	6.2145	4.3191	1.8196	4.4335	3.3964	1.2237	2.4402	1.7441	1.0514	1.6068	1.9273	1.5777	6.8504	5.1549	1.7797	4.0904	2.0888	1.957	6.8593
1-palmitoyl-GPI (16:0)*	Lipid	Lysolipid	35305	LC/MS Neg	100001655	5564	571.289				HMDB61695	1.1503	1.1323	1.4748	1.011	1.1358	2.2296	1.1671	1.2418	3.3696	0.8581	1.4834	0.896	1.2155	0.7133	0.4466	1.1446	2.3758	1.5821	1.2464	3.3141	2.2645	1.4237	2.8181	3.2213	0.6085	0.9862	0.9376	0.6306	0.7457	0.918	0.943	2.094	2.1009	1.0511	1.9549	0.8786	0.9905	2.6376
1-stearoyl-2-linoleoyl-GPC (18:0/18:2)*	Lipid	Phospholipid Metabolism	52452	LC/MS Pos Late	100008980	2380	786.601					2.5722	2.0161	2.3065	1.8253	2.1847	1.7229	2.3053	2.2258	2.2573	3.4026	3.5174	3.6328	3.3424	2.8929	4.4752	2.2545	2.8406	3.0133	4.0651	3.2839	3.6801	1.9943	2.3604	2.0173	2.7931	3.483	4.3082	3.2515	4.1827	3.2128	3.5557	3.191	4.259	2.6116	2.9528	2.9383	2.5068	3.4758
1-stearoyl-2-linoleoyl-GPE (18:0/18:2)*	Lipid	Phospholipid Metabolism	52446	LC/MS Pos Late	100008976	2522	744.554		9546749			2.037	1.7881	1.7461	1.7754	2.1255	3.4126	2.2936	2.3686	2.0152	3.9078	2.93	3.4608	2.8686	2.5403	3.6628	2.0375	2.2941	2.5414	3.4903	2.1618	2.5197	2.0936	1.6021	2.5802	2.1047	2.1916	2.6905	3.1006	3.8153	3.9673	3.0399	1.7487	2.4571	2.2998	2.0726	2.5096	2.6959	2.0105
1-stearoyl-2-oleoyl-GPC (18:0/18:1)	Lipid	Phospholipid Metabolism	52438	LC/MS Pos Late	100008904	2644	788.616	56421-10-4				2.7431	2.2622	1.0543	1.6252	2.4724	1.0754	2.6395	2.6912	0.9339	3.2401	1.0155	1.1147	2.3604	2.4247	1.2129	1.9773	0.8523	0.8835	3.7123	1.3966	1.3076	2.0981	0.6689	1.0412	2.3079	1.0758	1.2561	2.8044	3.5194	1.4516	3.1341	1.108	1.2396	2.5253	1.0173	1.1582	2.0235	1.0306
1-stearoyl-2-oleoyl-GPE (18:0/18:1)	Lipid	Phospholipid Metabolism	42448	LC/MS Pos Late	100001856	2858	746.569					2.1446	1.8945	2.2439	1.6032	2.1794	1.3254	2.4149	2.2791	2.7986	3.1361	1.5092	3.223	2.1284	2.1304	3.2694	2.1456	1.2411	2.8848	2.6344	1.2514	2.7962	1.9792	1	1.1694	1.9039	1.1596	3.1258	2.866	3.3252	1.7694	2.6523	1.3478	3.4732	2.0579	1.1733	0.9963	2.0341	1.1737
1-stearoyl-GPC (18:0)	Lipid	Lysolipid	33961	LC/MS Pos Late	100001271	1606	524.371	19420-57-6	497299		HMDB10384	2.3932	3.8467	1.4936	1.7074	2.6044	2.0116	2.8562	3.1388	1	2.752	1.6162	1.2228	4.1623	3.7416	1.3684	3.5512	1.2077	1.0372	4.6938	2.1524	1.8358	3.0264	1.1629	2.5133	2.4841	1.3038	1.0733	2.428	3.2773	2.5823	4.2353	2.0138	1.6605	4.1162	1.4259	3.0103	2.9923	1.8557
1-stearoyl-GPE (18:0)	Lipid	Lysolipid	42398	LC/MS Pos Late	100001461	1626	482.324	69747-55-3	9547068		HMDB11130	3.201	4.5767	3.8992	1.5117	2.5831	2.8378	2.1041	2.1277	1.6379	3.5667	5.6663	4.0157	4.0898	3.393	3.1009	3.7435	3.7256	2.4779	5.6081	6.5871	4.7063	2.6379	2.9063	3.6298	3.2805	4.7133	3.0505	3.0531	4.7152	4.7376	4.6438	7.9156	4.868	4.7185	4.7524	5.1855	4.033	7.4125
1-stearoyl-GPI (18:0)	Lipid	Lysolipid	19324	LC/MS Neg	100000656	5794.3	599.32	796963-93-4			HMDB61696	0.881	0.4022	1.052	0.4583	0.2142	0.974	1.1222	1.0326	1.1733	0.6499	0.9521	0.5723	1.2289	0.4396	0.3594	1.133	1.0655	0.896	1.516	2.4249	1.8952	0.6032	1.0074	1.2875	0.5443	0.6543	0.8358	0.8078	0.6963	0.7955	1.0483	1.3958	1.3363	1.0218	1.1855	0.5971	1.0917	1.2817
2,3-dihydroxyisovalerate	Xenobiotics	Food Component/Plant	38276	LC/MS Polar	100002417	1050	133.051	1756-18-9	677	C04039	HMDB12141	1.244	1.1627	2.6826	5.4013	1.4823	0.5528	3.1546	1.0607	0.6594	1.2197	4.2974	0.4797	6.0935	0.7524	1.7493	5.0222	0.9829	0.9393	1.3919	2.1492	0.3506	2.1142	2.6103	1.1663	2.2463	3.9111	2.2087	1.0019	0.4923	0.9009	0.4522	0.5091	1.5706	0.6103	0.8677	1.2398	7.4002	2.2752
2-aminooctanoate	Lipid	Fatty Acid, Amino	43343	LC/MS Pos Late	100004227	750	160.133	644-90-6	69522		HMDB00991	0.5696	0.7882	1.0878	0.8348	0.3754	0.7433	0.3754	0.3754	0.3754	0.7027	0.3754	0.737	1.9035	0.7289	0.7357	0.4845	0.3754	0.8996	2.4724	2.9976	3.5798	0.7172	0.3754	0.4616	0.5991	0.9825	1.017	1.0665	1.5384	1.3141	0.3754	0.434	0.5281	0.5143	0.4753	0.7783	0.3754	0.3754
2'-deoxycytidine	Nucleotide	Pyrimidine Metabolism, Cytidine containing	15949	LC/MS Pos Early	100000125	2193	228.098	951-77-9	13711	C00881	HMDB00014	1.365	0.8167	1.2734	1.4199	1.6177	1.3	2.6912	2.4199	2.029	0.7504	1.1422	1.2735	1.3665	1.963	2.0744	0.9581	0.9019	1.0729	1.0938	0.1409	1.4743	1.0856	0.6179	1.5002	0.7752	0.1409	0.8911	0.6043	0.9532	1.3373	0.456	0.5205	0.8918	1.8674	0.5396	1.8918	1.7915	1.2129
2'-deoxyguanosine	Nucleotide	Purine Metabolism, Guanine containing	1411	LC/MS Neg	348	1751	266.089	961-07-9	187790	C00330	HMDB00085	1.2138	1.1618	0.494	1.1132	1.4453	1.7585	1.5946	1.3978	1.4965	1.3485	2.0657	1.1395	1.7291	1.4493	1.2509	1.0286	1.1353	0.5788	1.0717	1.6812	1.2501	1.3038	1.2553	1.5605	1.1298	1.0775	0.4829	1.6152	1.2761	1.313	0.9184	1.7478	0.9034	1.2464	1.581	1.1747	1.5307	3.4885
2'-deoxyinosine	Nucleotide	Purine Metabolism, (Hypo)Xanthine/Inosine containing	15076	LC/MS Neg	100000135	1688	251.079	890-38-0	65058	C05512	HMDB00071	1.4636	1.3544	0.6903	1.2846	1.9445	2.2565	1.7197	1.7038	1.7308	1.3493	2.4184	1.551	1.8238	1.6462	1.6712	1.192	1.4112	0.6651	1.3799	2.4234	1.6177	1.4853	2.1467	2.4403	1.7865	2.2806	1.1437	2.2434	1.9679	2.7012	1.135	2.3492	1.416	1.6915	2.5656	2.7432	2.4806	5.2147
2'-deoxyuridine	Nucleotide	Pyrimidine Metabolism, Uracil containing	1412	LC/MS Polar	536	1100	273.073	951-78-0	13712	C00526	HMDB00012	1.7088	1.2073	1.9549	1.3387	1.466	1.583	2.3701	2.9885	1.9688	1.2851	1.1834	1.9045	1.4718	1.4156	1.2394	1.5068	1.2107	1.5589	1.2805	1.304	1.4584	1.3759	1.288	1.8299	1.3643	1.6805	1.7257	1.5095	1.3503	1.819	1.5525	1.1053	1.7824	2.2873	1.5475	2.2632	2.0259	1.742
2-hydroxy-3-methylvalerate	Amino Acid	Leucine, Isoleucine and Valine Metabolism	36746	LC/MS Neg	100001541	1800	131.071	488-15-3	164623		HMDB00317	1.3686	1.7051	1.3638	1.4185	0.3751	0.2947	0.8155	0.2947	0.9334	0.2947	1.3102	0.6968	0.9423	0.2947	1.289	1.5767	0.6348	2.0699	0.4725	0.2947	0.2947	1.3131	3.1915	2.2786	2.3165	7.2973	6.6672	1.6224	2.8158	7.0881	0.2947	1.0331	2.9239	0.6026	0.2947	3.3879	5.0831	4.4083
2-hydroxybutyrate/2-hydroxyisobutyrate	Amino Acid	Methionine, Cysteine, SAM and Taurine Metabolism	52281	LC/MS Polar	100008928	1258	103.04					0.4023	0.6793	0.6886	1.0684	0.4023	1.1919	1.0323	0.4023	1.1539	1.0548	1.1403	0.4023	0.4023	0.5085	1.3761	0.4023	0.4023	0.4023	1.2711	1.4282	0.4023	0.7753	1.0485	0.8544	0.4023	0.8243	0.4023	0.8156	0.785	0.4023	0.4023	1.2883	0.9332	0.4023	0.945	0.7026	0.8015	2.1043
2-hydroxyglutarate	Lipid	Fatty Acid, Dicarboxylate	37253	LC/MS Polar	100002070	3352.8	147.03	40951-21-1	43	C02630	HMDB00606	0.9931	1.4804	1.8475	0.8029	0.6369	0.7837	1.3574	1.3038	1.1836	0.4405	0.4497	1.1693	0.7281	1.2649	1.3485	0.6044	0.5577	1.6525	0.7304	0.7551	1.1655	0.5902	0.5461	1.4067	1.2486	0.7727	2.0553	0.9438	2.5026	2.3227	1.7081	0.854	2.2219	0.9686	0.616	0.9451	1.6592	1.1753
2-isopropylmalate	Xenobiotics	Food Component/Plant	15667	LC/MS Polar	100000409	2605	175.061	3237-44-3	77	C02504	HMDB00402	1.3215	0.5812	2.2604	5.2938	1.4428	0.403	4.717	1.0602	0.7443	1.0587	3.8497	0.5911	8.5976	0.5787	3.5199	4.1923	0.3632	0.6225	1.5609	2.5275	0.1189	1.7233	4.6301	1.7731	2.092	3.012	2.1199	0.9614	0.3377	0.845	0.3289	0.4433	0.8167	0.3384	1.166	1.1453	4.8209	3.4203
2-keto-3-deoxy-gluconate	Xenobiotics	Food Component/Plant	48141	LC/MS Polar	100005946	1900	177.04	17510-99-5	161227		HMDB01353	0.9627	0.317	1.0007	3.3154	1.0439	0.4899	2.1391	1.5885	0.7029	0.9939	4.5288	0.4769	4.9081	0.9896	1.7294	1.8924	0.1498	1.1276	1.5222	1.645	0.3795	2.0448	2.7472	1.149	1.6642	0.8182	0.6092	0.8898	0.3231	0.1498	0.1498	0.4232	0.5866	0.1498	0.4907	0.1498	2.9729	2.5427
2-ketogluconate	Xenobiotics	Food Component/Plant	48370	LC/MS Polar	100005943	2668	193.035	1040352-40-6	3035456			1.7591	1.1619	3.3749	8.4728	2.9607	0.7457	6.3336	3.3526	1.0913	0.5639	9.008	0.7834	7.708	3.1338	5.3984	3.3318	0.1648	0.8547	1.6014	2.0343	0.0883	1.5049	4.0919	1.8315	1.1012	2.1942	1.2163	1.9739	0.7856	1.2778	0.0813	0.0481	0.3868	0.5061	0.5127	1.0849	4.9993	1.2318
2-linoleoylglycerol (18:2)	Lipid	Monoacylglycerol	32506	LC/MS Neg	100000987	6250	279.233	3443-82-1	5365676		HMDB11538	1.231	0.8329	1.0718	0.6764	1.203	2.165	1.9724	1.6851	1.4036	1.4811	0.9294	0.8118	1.4638	0.9727	0.7038	1.3163	0.816	3.4631	1.2083	1.3495	1.6817	1.5405	2.1898	1.7192	1.2375	0.8812	1.5729	0.9567	1.1917	0.9541	1.235	0.9466	2.1904	1.2835	1.0317	0.4596	1.5427	1.538
2-methylcitrate	Energy	TCA Cycle	37483	LC/MS Neg	90	575	205.035	6061-96-7	439681	C02225	HMDB00379	0.8316	0.6155	0.9263	2.171	1.1003	1.2692	2.5456	1.1001	1.4983	0.9798	1.0733	0.956	1.8604	0.5319	1.0995	1.7555	1.1277	1.3942	0.8199	0.645	0.562	0.9861	0.9729	1.3823	1.6078	1.7188	1.9499	1.3897	1.2631	1.4845	0.7812	0.6026	1.4142	0.4274	0.6111	1.0353	1.6398	0.7552
2-methylserine	Amino Acid	Glycine, Serine and Threonine Metabolism	53229	LC/MS Pos Early	100009246	1652	120.066		94309			5.5507	7.232	3.574	1.1539	1.2715	0.9543	1.6151	0.916	2.2458	0.8357	0.4598	0.8147	0.0864	0.6658	0.6881	0.0864	0.0864	1.1366	0.0864	0.0864	0.0864	1.8722	0.0864	2.8578	0.9008	0.8341	0.716	0.0864	1.3663	1.0052	2.0492	1.3709	1.2537	1.9657	1.0886	2.3844	1.7807	1.7535
2'-O-methylguanosine	Nucleotide	Purine Metabolism, Guanine containing	36811	LC/MS Neg	100001713	1912.6	296.1	2140-71-8		C04545		1.0271	0.9346	0.9874	0.928	0.7288	0.8384	0.7266	0.6811	0.6613	0.8321	0.7169	0.6832	0.9837	0.7117	0.9307	0.6021	0.4689	0.5738	0.7295	0.9794	0.8043	0.9018	0.884	0.8364	0.5805	0.4954	0.4845	0.7179	0.8129	0.6481	0.8261	1.127	1.0081	1.1309	1.4471	1.1575	0.9792	1.3342
2-palmitoleoylglycerol (16:1)*	Lipid	Monoacylglycerol	52432	LC/MS Neg	100008953	6016	253.217					1.0133	1.1998	0.6931	1.083	0.7907	1.6102	2.8114	2.9131	1.6055	1.2105	0.9508	0.5861	0.8502	1.0351	0.2088	1.3588	1.1058	2.3023	1.3541	1.7571	1.0661	1.7651	1.3588	1.0126	0.5558	0.7677	0.79	0.773	1.4406	0.3221	1.934	1.2565	1.3425	2.5166	1.0778	0.8756	1.2891	1.3592
2-palmitoleoyl-GPC (16:1)*	Lipid	Lysolipid	35819	LC/MS Pos Late	100001561	1425	494.324					3.1816	8.1107	3.1982	2.5954	5.0409	3.7979	14.6116	13.2071	7.1352	8.4903	3.994	4.2349	5.4249	5.6082	1.8876	7.7151	1.5339	4.3967	8.0175	3.5915	6.6568	12.696	5.6376	3.9597	1.7637	1	1.8137	2.3382	2.9949	2.2928	5.711	4.0349	4.6594	8.9057	2.1752	3.6529	5.0451	3.1381
2-palmitoyl-GPC (16:0)*	Lipid	Lysolipid	35253	LC/MS Pos Late	100001562	1505	496.34		15061532		HMDB61702	4.6182	6.3017	3.0054	5.2005	6.6154	17.0093	10.2882	9.708	3.863	3.6738	1.673	1.7679	4.0356	7.1371	2.0336	5.825	2.3715	3.0813	4.6642	3.0192	2.8882	10.3191	4.8245	19.0305	2.8371	1.6678	1.8698	3.2941	2.4585	7.8989	6.3188	3.3511	3.1629	7.4762	2.4555	11.6452	6.1661	3.6007
2-phosphoglycerate	Carbohydrate	Glycolysis, Gluconeogenesis, and Pyruvate Metabolism	35629	LC/MS Polar	100000093	4346	184.986	70195-25-4	59	C00631	HMDB03391	7.9724	0.7541	0.2521	0.7734	1.866	2.0735	0.3996	0.6237	2.8441	2.0443	0.2921	1	0.091	1.9444	1.4594	1.3146	1.0801	0.6693	6.4922	1.7534	1.4635	0.3228	2.5157	0.9755	0.091	0.323	0.2861	4.3829	2.0333	0.6953	9.3268	1.1224	2.4762	0.091	0.4487	1.0426	0.091	0.7714
2-stearoyl-GPE (18:0)*	Lipid	Lysolipid	41220	LC/MS Neg	100003901	6350	480.31					0.9667	1.0856	1.0153	0.4154	0.6374	2.0422	0.5043	0.4916	1.1044	1.1856	2.7763	1.3378	1.2319	0.666	0.2987	1.0635	1.9464	1.3927	1.7053	3.1042	2.5112	0.6073	1.2593	1.1814	1.0577	1.1579	1.2084	0.9016	1.2616	0.8482	1.1915	3.8739	2.7995	1.2997	2.1356	0.9476	1.204	4.3244
3-(4-hydroxyphenyl)lactate	Amino Acid	Phenylalanine and Tyrosine Metabolism	32197	LC/MS Neg	240	1379	181.051	6482-98-0	9378	C03672	HMDB00755	1.0487	0.8466	1.4563	0.48	0.2258	0.2258	1.3017	0.2258	0.9278	0.6474	0.2258	0.2258	0.2258	0.2258	0.3597	0.9587	1	2.2966	0.3819	0.4506	0.2258	1.0999	1.758	1.339	0.2258	0.8689	2.2671	0.7963	2.0044	2.3489	0.2258	0.6833	1.9395	1.9648	0.4647	2.9354	2.6998	2.473
3,4-dihydroxyphenylacetate	Amino Acid	Phenylalanine and Tyrosine Metabolism	18296	LC/MS Neg	100000449	1040	123.045	102-32-9	547	C01161	HMDB01336	0.1101	0.3369	0.5395	0.1101	0.1101	0.1101	0.1101	0.1101	0.3216	0.1101	0.1101	0.1101	0.1101	0.1101	0.1101	0.1101	0.1101	0.1101	0.1101	0.1101	0.1101	0.1101	0.1101	0.1101	0.1101	0.1101	0.1101	0.1101	0.1101	0.4324	0.1101	0.1101	0.3194	0.1101	0.1101	0.1101	0.1101	0.1101
3-aminoisobutyrate	Nucleotide	Pyrimidine Metabolism, Thymine containing	1566	LC/MS Pos Early	1114	2215	104.071	10569-72-9;214139-20-5	64956	C05145	HMDB03911	2.3905	1.7165	2.9363	1.8754	2.0076	1.7022	1.806	1.2759	1.5845	2.2852	2.3701	2.8009	1.4782	1.1802	2.2024	1.5629	1.7454	1.4112	0.9027	0.0506	0.9294	1.6303	1.096	1.5277	1.9879	1.257	1.6332	1.0621	1.7545	1.8259	1.4193	1.2809	2.4981	1.1844	0.5338	2.5692	2.3706	1.912
3-hydroxy-3-methylglutarate	Lipid	Mevalonate Metabolism	531	LC/MS Polar	112	2700	161.046	503-49-1	1662	C03761	HMDB00355	0.7917	0.6607	0.9126	1.5996	0.8413	0.6862	1.3865	1.0234	0.8616	1.1355	1.652	0.8993	1.5252	0.9868	0.9602	1.2274	0.9971	0.911	1.281	1.9224	1.0655	1.4366	1.536	0.9727	1.0359	1.207	1.0495	1.0126	0.7307	1.029	0.7252	1.1479	1.0557	0.7486	0.9759	0.8624	1.3546	1.5858
3-hydroxybutyrate (BHBA)	Lipid	Ketone Bodies	542	LC/MS Polar	254	1443.3	103.04	625-72-9	441	C01089	HMDB00357	1.4214	0.7699	1.2705	1.2612	0.7862	0.7479	1.3669	1.0734	1.3246	1.2002	1.18	1.21	0.9574	0.6399	0.615	1.1687	0.87	1.0334	1.1995	0.9924	1.0734	1.0414	1.4771	1.1748	1.5389	0.9381	1.1118	0.8971	0.8438	0.9569	0.9587	1.6557	1.2446	0.8088	0.5943	0.7105	1.196	1.5629
3-hydroxybutyrylcarnitine (2)	Lipid	Fatty Acid Metabolism(Acyl Carnitine)	52984	LC/MS Pos Early	100009271	2340	248.149					0.9186	0.5801	0.5381	2.5848	2.1551	2.5259	1.6415	1.3521	1.58	0.86	0.7086	1.069	1.2106	0.8889	0.9937	0.557	0.435	0.5345	1.3953	1.3362	1.7001	2.3324	1.7179	2.1609	0.7985	0.4575	1.0272	0.3287	0.5932	0.8074	1.5026	1.1712	1.5916	0.9329	0.3287	0.6219	1.0292	1.2579
3-hydroxydecanoate	Lipid	Fatty Acid, Monohydroxy	22053	LC/MS Neg	100000997	4634.7	187.134	5561-87-5	26612		HMDB02203	2.3666	1.4431	1.9939	1.8354	1.599	0.7737	1.529	1.5859	0.6743	0.1788	0.4804	1.1998	0.9213	0.4242	0.6599	0.3832	0.4205	1.0518	0.7755	1.9444	2.4353	2.0532	1.7374	0.8929	0.2061	0.3811	1.0599	0.897	1.5825	0.9363	0.1747	0.2815	0.9887	1.0057	1.0392	1.3094	0.6735	0.5263
3-hydroxyisobutyrate	Amino Acid	Leucine, Isoleucine and Valine Metabolism	1549	LC/MS Polar	111	1619.1	103.04	2068-83-9	87	C06001	HMDB00336	1.5706	1.0377	2.8773	2.2153	1.4142	1.498	1.828	0.9284	1.5898	1.8707	1.8925	1.0228	1.0065	0.649	1.2717	1.257	1.2589	1.3536	0.9303	0.8786	0.5599	1.5125	1.2091	1.5679	1.954	1.8902	1.1337	0.6233	0.3915	1.0078	0.6192	1.1674	1.208	0.6663	1.0099	1.6783	2.1777	1.8643
3-hydroxykynurenine	Amino Acid	Tryptophan Metabolism	22110	LC/MS Pos Early	100000986	2536	225.087	2147-61-7	89	C02794	HMDB00732	0.7069	0.6077	0.4938	0.7028	0.6522	0.916	0.9718	0.8055	0.9199	0.6329	0.5261	0.6565	0.4936	0.5602	0.6069	0.6343	0.6512	0.6237	1.3145	1.3243	1.4614	0.8763	0.8115	0.7414	0.5657	0.4052	0.5841	0.7257	0.755	0.5604	0.895	0.8051	0.8102	0.5366	0.4089	0.6111	0.5797	0.4787
3-hydroxylaurate	Lipid	Fatty Acid, Monohydroxy	32457	LC/MS Neg	100001112	5175	215.165	53941-38-1	94216		HMDB00387	1.7295	1.667	1.6975	0.9912	1.2723	0.97	1.1747	1.4227	0.7332	0.5388	0.6435	1.0811	0.7201	0.7942	0.6503	0.7155	0.7205	1.1698	0.8958	1.1467	1.4852	1.0496	1.0634	0.9821	0.7387	0.83	0.9786	0.939	1.5743	1.1865	0.7202	0.8661	1.0624	1.2718	1.2393	1.1523	0.751	0.7614
3-hydroxymyristate	Lipid	Fatty Acid, Monohydroxy	21158	LC/MS Neg	100000882	5335	243.197	3422-31-9	16064			1.3586	1.314	1.041	0.5289	0.5422	0.8446	0.6532	0.9651	0.9172	0.8088	0.6886	0.7892	0.6019	0.6305	0.5478	0.6867	0.9038	1.0871	0.6553	0.8569	0.8968	1.1147	0.8661	0.9144	0.7162	0.7162	0.9696	0.6892	0.9982	0.9366	0.6876	0.8166	0.8486	1.1884	1.1759	1.1199	0.5541	0.7923
3-hydroxyoctanoate	Lipid	Fatty Acid, Monohydroxy	22001	LC/MS Neg	100000773	3446	159.103	88930-08-9	26613		HMDB01954	1.9686	1.2681	2.0873	1.2966	0.9237	0.59	1.47	1.6426	0.6501	0.1969	0.442	1.0026	1.2818	0.4269	0.6017	0.2725	0.3407	1.0936	0.7648	1.7151	2.4734	1.8297	1.6404	0.8196	0.2117	0.4114	1.0204	1.0463	1.7955	1.1222	0.1415	0.3968	0.9105	1.1837	1.1584	1.1915	0.7198	0.601
3-hydroxypalmitate	Lipid	Fatty Acid, Monohydroxy	27503	LC/MS Neg	100000983	5476	271.228	928-17-6	301590		HMDB10734	0.9666	0.8635	0.7216	0.8015	0.6086	0.9451	0.8421	0.7678	0.7	0.83	0.8688	0.9585	0.998	0.7838	0.845	1.2914	1.0259	1.3582	0.8431	0.9751	0.6747	0.7311	0.7799	0.712	1.5559	1.0859	1.1706	0.8986	0.9525	0.9834	0.8127	0.6813	0.7963	0.8152	1.081	1.0345	1.3786	0.9362
3-hydroxypropanoate	Lipid	Fatty Acid, Monohydroxy	1556	LC/MS Polar	115	1845	89.0244	503-66-2	68152	C01013	HMDB00700	0.775	1.067	1.433	2.484	1.2469	1.8455	2.0954	1.0685	2.1623	2.4431	4.1696	1.4688	1.1271	0.8182	1.1343	1.162	1.2783	1.0002	1.7365	2.8996	0.9516	1.3657	1.1358	1.576	1.9514	1.8387	0.9786	0.8463	1.1487	1.208	0.55	0.8196	1.1123	1.0011	2.207	0.9201	1.5667	1.6276
3-hydroxysebacate	Lipid	Fatty Acid, Monohydroxy	31943	LC/MS Polar	100001145	2411	217.108	73141-46-5	3017884		HMDB00350	1.1771	0.8916	1.1693	2.8613	1.6834	0.9169	2.4802	1.1667	0.4674	0.3534	1.0497	0.8171	1.8864	0.5172	0.6204	0.4908	0.6253	0.453	1.3439	2.7671	2.0929	1.8822	2.6441	0.7901	0.4193	1.3164	1.4476	0.6468	1.0468	0.6534	0.1882	0.7212	0.6343	0.5113	0.6946	1.0711	0.7075	0.8043
3-hydroxysuberate	Lipid	Fatty Acid, Monohydroxy	31936	LC/MS Pos Early	100001143	1892	191.091	73141-47-6	22328017		HMDB00325	1.5048	1.3595	0.3725	1.1628	0.8599	0.3725	1.3763	0.8892	0.8679	0.6114	0.3725	0.8431	0.3725	1.0026	2.2884	0.6438	0.3725	0.3725	0.8991	0.6315	1.0924	0.3725	0.3725	1.1734	0.3725	1.0016	0.6876	0.3725	1.0822	3.2678	0.3725	0.3921	0.3725	0.6531	0.3725	0.3725	0.3725	1.2139
3-ketosphinganine	Lipid	Sphingolipid Metabolism	34381	LC/MS Pos Late	100001436	1400	300.29	18944-28-0	631	C02934	HMDB01480	2.0833	1.1933	2.8861	5.0095	2.297	1.1537	1.6021	0.6322	0.5961	1.1337	2.7072	0.8376	3.6644	0.6441	1.5674	6.4943	1.2529	0.8769	1.3079	1.3404	0.1718	1.4359	2.1119	1.7396	4.9393	4.0394	2.36	1.6661	0.83	0.9555	1.2284	0.6579	2.071	0.7541	1.5676	1.3887	6.0082	2.3737
3-methyl-2-oxobutyrate	Amino Acid	Leucine, Isoleucine and Valine Metabolism	44526	LC/MS Polar	100000936	911	115.04	3715-29-5	49	C00141	HMDB00019	4.5583	3.1824	2.6239	2.3503	1.8652	1.4058	2.3766	2.4829	2.1882	4.5245	3.8867	4.3623	4.2291	2.2544	3.7241	2.2177	2.7246	2.0146	2.6398	2.3087	1.6196	3.0652	3.4708	4.7533	4.5855	4.5294	5.1114	2.7087	3.4304	4.8831	2.6968	1.8605	2.5258	0.8982	1.7349	3.9863	3.0179	1.4967
3-methyl-2-oxovalerate	Amino Acid	Leucine, Isoleucine and Valine Metabolism	15676	LC/MS Neg	100000036	2064.2	129.056	1460-34-0;51829-07-3	47	C00671	HMDB03736	3.3499	2.0783	0.4214	1.2875	1.5281	1.1011	1.7617	1.8242	1.0999	3.2932	4.6332	1.6007	3.248	1.3179	2.4169	1.9808	2.6476	0.3828	2.1151	3.6032	0.725	1.9652	4.5757	2.3971	2.4902	5.8897	0.9004	2.316	3.1562	5.3226	1.5357	4.3899	0.7478	1.0417	3.7747	3.7363	1.5519	3.3456
3-methylcytidine	Nucleotide	Pyrimidine Metabolism, Cytidine containing	35132	LC/MS Pos Early	100001466	2176	258.108	21028-20-6	159649			1.5111	1.0136	0.8859	1.4808	1.244	1.8921	1.3555	1.1633	1.8289	1.1124	1.1372	1.6643	1.0148	1.7339	2.2445	0.5107	0.438	0.6799	1.5137	0.9948	1.6406	0.6404	0.3458	1.627	0.429	0.4987	0.8324	0.3458	0.7943	1.1306	1.2014	0.6362	0.9253	1.4625	0.5068	1.3605	0.994	0.6585
3-methylhistidine	Amino Acid	Histidine Metabolism	15677	LC/MS Neg	100000042	906.3	168.078	368-16-1	64969	C01152	HMDB00479	1.3518	1.7058	1.1895	0.7604	0.6104	0.9642	1.0117	0.8278	1.2309	1.3615	0.5979	1.0171	0.7443	1.1269	0.8217	0.6985	0.9301	1.4207	0.9104	0.9291	1.1683	1.0291	0.9859	1.1429	0.4781	0.4389	0.3933	0.6162	0.9613	0.6693	1.3335	1.0658	1.8049	0.5556	0.6114	1.3394	1.2177	1.0222
3-phosphoglycerate	Carbohydrate	Glycolysis, Gluconeogenesis, and Pyruvate Metabolism	1414	LC/MS Neg	132	583	184.986	80731-10-8	724	C00597	HMDB00807	1.786	0.8912	0.0359	2.3422	1.3654	2.268	0.8639	0.7205	0.6123	0.9786	2.5171	1.0732	0.344	0.6314	0.0173	1.2225	3.7386	0.0219	1.3464	3.981	0.4597	0.8229	2.0792	0.5111	0.1299	0.4052	0.0829	0.5927	1.6303	0.0173	2.9319	4.2996	0.359	0.5244	1.9541	0.3632	0.8251	3.2496
3-ureidopropionate	Nucleotide	Pyrimidine Metabolism, Uracil containing	3155	LC/MS Pos Early	1053	875	133.061	462-88-4	111	C02642	HMDB00026	3.2232	0.4084	1.7197	1.4002	0.3862	0.4339	1.4968	0.8312	0.24	2.4483	2.2359	0.9342	1.1987	0.4238	3.0765	1.5022	1.4596	1.2265	1.2135	0.3385	0.0703	0.4073	0.0703	0.4566	0.6902	3.5531	1.3734	3.7101	7.0983	4.2123	0.7756	0.1732	0.6746	0.0801	1.4724	0.3805	3.8025	1.3585
4-guanidinobutanoate	Amino Acid	Guanidino and Acetamido Metabolism	15681	LC/MS Pos Early	100000096	2320	146.092	463-003;463-00-3	500	C01035	HMDB03464	1.7246	1.3191	1.3826	1.186	0.9916	0.9326	1.4013	1.3004	1.987	1.1589	1.1877	1.3849	0.8058	1.8298	2.1951	0.6537	0.8107	0.8382	1.3922	0.7388	1.2586	0.9518	0.8911	1.3948	0.8225	1.2532	1.0582	0.7273	1.5715	1.781	0.9952	0.7707	1.2755	1.0174	0.645	1.2396	2.1651	1.1555
4-hydroxybenzoate	Xenobiotics	Benzoate Metabolism	21133	LC/MS Neg	100000862	820	137.024	99-96-7	135	C00156	HMDB00500	0.8545	0.808	1.2239	2.3318	1.0768	0.8609	3.048	1.4816	0.952	1.5426	2.908	0.8417	2.9188	1.3159	1.5248	1.9688	1.0474	1.2902	1.7225	2.4274	1.032	1.472	1.3086	0.9838	1.5044	1.3771	1.2737	1.1458	0.5864	1.1209	0.4633	1.0732	0.8459	0.1038	0.2052	0.1591	1.7331	2.0734
4-hydroxybutyrate (GHB)	Lipid	Fatty Acid, Monohydroxy	34585	LC/MS Polar	100001507	1765	103.04	502-85-2	10413	C00989	HMDB00710	1.7944	0.8936	1.3835	1.7761	1.2033	0.7247	1.7815	1.4097	0.8079	0.9465	1.6687	1.9693	1.7447	0.5935	1.2294	1.2445	0.9943	0.9285	1.5046	1.0301	0.5864	0.4164	0.761	0.9335	1.4425	1.7852	1.2153	1.2294	1.6046	1.009	1.6008	1.2758	1.1825	0.9981	1.5565	1.1565	0.7984	2.0363
4-hydroxyhippurate	Xenobiotics	Benzoate Metabolism	35527	LC/MS Polar	100001423	1550	194.046	2482-25-9	151012		HMDB13678	0.8735	0.4305	1.552	4.264	1.6255	1.1293	1.7419	1.9163	0.4035	0.9983	3.1146	0.5622	10.692	3.2396	2.7754	2.4823	1.006	0.8009	2.08	4.2815	1.3284	0.3859	0.7804	0.5291	0.8641	1.7629	1.0309	0.6533	0.2471	0.2835	0.0795	0.4418	0.0795	0.1132	0.1919	0.0795	1.7098	2.2917
4-hydroxyphenylpyruvate	Amino Acid	Phenylalanine and Tyrosine Metabolism	1669	LC/MS Neg	1141	1690.1	179.035	156-39-8	979	C01179	HMDB00707	0.3896	0.2096	1.5726	0.2096	0.2096	1.1116	0.2096	0.2096	1.8092	0.2096	1.0118	1.252	0.2096	0.2096	2.1611	0.2096	1.6556	1.6912	0.2096	1.7951	2.2703	0.2096	1.9474	2.4653	0.2096	2.1091	1.6704	0.9941	4.1681	4.1355	0.3178	1.7186	1.9318	2.1085	0.9995	2.2687	1.7072	0.9799
4-imidazoleacetate	Amino Acid	Histidine Metabolism	32349	LC/MS Pos Early	100001207	2055	127.05	645-65-8	96215	C02835	HMDB02024	1.6937	1.1799	1.1537	1.4884	1.4294	1.2157	1.4904	1.2307	1.5565	1.1618	1.1282	1.1839	0.6131	1.2636	1.1549	0.7465	0.3626	0.8494	1.2726	0.8248	1.1928	1.1752	0.663	1.3788	0.6991	0.623	1.0971	0.7962	1.449	1.7057	0.9734	0.9072	1.1442	1.1059	0.8022	1.2203	1.2078	1.0045
4-methyl-2-oxopentanoate	Amino Acid	Leucine, Isoleucine and Valine Metabolism	22116	LC/MS Neg	100000551	2170	129.056	816-66-0	70	C00233	HMDB00695	3.4813	2.4991	1.1514	1.1631	1.4258	1.7002	1.9513	2.0713	2.2287	3.888	3.9997	2.6108	3.0251	1.0585	2.6053	1.9289	3.1191	0.863	2.104	2.4291	1.0329	2.232	3.8674	3.7176	3.0459	4.1675	2.5186	2.2157	3.0924	5.0247	1.8195	4.1306	1.7258	0.9958	2.6249	4.7566	1.724	2.3511
5-aminolevulinate	Cofactors and Vitamins	Hemoglobin and Porphyrin Metabolism	2290	LC/MS Pos Early	1306	2049	132.066	5451-09-02	137	C00430	HMDB01149	1.0025	0.4706	0.4955	2.7019	2.6557	3.4606	1.3316	1.2542	2.2002	1.8466	1.8244	2.0604	0.3667	0.9855	1.2905	1.2618	0.2633	0.5606	0.915	0.7242	0.334	1.168	0.9126	1.2697	1.0741	0.7418	1.2536	0.553	0.9053	1.1404	0.6933	0.7084	0.7454	1.7122	0.9393	2.3344	0.9785	0.9914
5-dodecenoate (12:1n7)	Lipid	Medium Chain Fatty Acid	33968	LC/MS Neg	100001232	5224	197.155	2430-94-6	5312378		HMDB00529	1.0858	1.2636	1.8057	0.3674	0.5105	0.6404	0.8786	0.8359	1.1018	0.7855	0.6205	1.2063	0.9693	0.8095	1.0484	0.9979	0.7839	1.591	0.736	0.668	0.9043	0.8413	0.777	1.0882	0.9587	0.8711	1.3111	1.0973	1.1804	1.5839	0.5994	0.5711	1	0.6307	0.5763	0.7561	0.6266	0.647
5-methylthioadenosine (MTA)	Amino Acid	Polyamine Metabolism	1419	LC/MS Pos Early	212	2752	298.097	2457-80-9	439176	C00170	HMDB01173	1.1936	1.1452	0.6828	1.2785	1.7505	2.3117	1.2575	1.1171	1.5917	1.0329	0.7487	1.2554	0.5668	0.9882	1.1833	0.5465	0.6446	0.9313	1.58	1.2029	2.005	0.664	0.5266	1.346	0.4695	0.5675	0.8853	0.5576	1.2359	1.2265	1.512	0.9542	1.2012	1.9848	0.9536	2.0544	2.7094	1.4678
5-methyluridine (ribothymidine)	Nucleotide	Pyrimidine Metabolism, Uracil containing	35136	LC/MS Neg	100001446	1778.1	257.078	1463-10-1	445408		HMDB00884	1.0632	1.2147	1.243	0.8686	1.1612	1.0604	0.9028	0.9662	0.9417	1.1426	0.3571	0.9406	1	0.3571	0.8171	0.9908	0.7573	1.2646	1.5115	1.3151	1.2942	1.6086	0.7199	1.0808	1.2286	0.3571	1.0017	0.3571	0.3571	0.8992	1.2444	1.1368	1.4851	0.3571	0.5359	0.3571	1.2941	0.7976
5-oxoproline	Amino Acid	Glutathione Metabolism	1494	LC/MS Neg	1021	738.5	128.035	98-79-3	7405	C01879	HMDB00267	1.6383	1.1688	1.4971	0.7924	0.825	0.9834	1.1235	1.1445	1.3451	0.7301	0.8463	1.0069	1.2386	1.1232	1.32	1.4641	1.7538	1.4954	1.0848	1.3053	1.1756	1.0173	1.0847	0.8999	0.4915	0.3895	0.4525	1.009	1.1583	0.9005	1.1114	1.5047	0.9087	0.9373	1.4385	1.3463	0.4652	0.492
6-phosphogluconate	Carbohydrate	Pentose Phosphate Pathway	15442	LC/MS Neg	100000341	583.9	275.017	921-62-0;53411-70-4	91493	C00345	HMDB01316	0.8078	0.9968	0.3135	1.4404	2.2303	2.0651	1.5039	0.6032	1.733	0.6777	5.3868	1.5501	0.1322	0.7279	0.6234	0.2973	1.2598	0.6523	0.3407	1.1816	1	0.4735	0.9303	0.9668	0.1322	0.2498	0.4089	0.6581	1.2512	2.3371	4.122	3.1312	3.144	0.3424	0.8212	0.6222	0.5674	0.7431
7-methylguanine	Nucleotide	Purine Metabolism, Guanine containing	35114	LC/MS Neg	100001456	1729.7	164.058	578-76-7	11361	C02242	HMDB00897	1.2467	1.2643	1.2464	1.1146	0.9958	1.0758	1.0018	1.1245	0.893	1.3431	1.4213	1.5205	1.4036	1.0886	1.0958	0.7612	0.8112	0.7313	1.0318	0.8799	0.8228	0.8321	0.7921	0.7033	0.5986	0.6376	0.6622	0.5133	0.5376	0.53	0.8657	1.1167	1.0279	0.8873	1.0355	1.0845	0.787	0.7257
7-methylguanosine	Nucleotide	Purine Metabolism, Guanine containing	31580	LC/MS Pos Early	100001118	2214	298.115	20241-86-4				1.2244	1.5185	0.9266	1.956	1.8657	1.9876	2.0257	1.2892	2.2323	1.6521	2.0393	1.8372	0.8983	2.5502	2.1429	0.8145	1.1367	1.5394	1.2329	0.2268	1.627	1.1043	0.8797	1.7818	0.4667	0.2268	0.8655	0.5879	1.0396	1.2862	2.5536	1.0796	1.5047	1.4538	0.7152	1.1697	1.4321	1.1378
9,10-DiHOME	Lipid	Fatty Acid, Dihydroxy	38399	LC/MS Neg	179	5180	313.238	263399-34-4	9966640	C14828	HMDB04704	0.8424	0.634	0.8334	1.3728	1.1891	1.3406	1.3947	1.1725	1.2056	1.1354	1.5591	1.0433	1.6731	1.1099	1.6893	1.1756	1.1666	1.0969	1.5931	2.2301	1.6883	1.0868	0.8639	1.4018	2.6565	2.6891	2.6709	1.2493	0.8393	1.3467	1.293	1.0208	1.5058	1.1232	1.5341	1.2272	1.1295	1.1645
acetylcarnitine	Lipid	Fatty Acid Metabolism(Acyl Carnitine)	32198	LC/MS Pos Early	100000802	2282	204.123	5080-50-2	1	C02571	HMDB00201	1.275	0.9688	0.9207	0.6947	0.6739	0.7333	0.8789	0.9044	0.9948	0.7272	0.8171	1.1739	0.4824	0.7266	0.8376	0.6225	1.0448	0.9532	0.8926	0.9693	0.8201	0.6147	0.6709	0.8094	0.6255	0.7875	0.732	0.4515	0.9408	0.7539	0.9055	0.8037	1.0562	0.7271	0.82	1.2184	1.1312	1.3396
acetylphosphate	Energy	Oxidative Phosphorylation	15488	LC/MS Polar	1211	4013.9	138.98	94249-01-1	186	C00227	HMDB01494	0.6617	1.0011	0.5849	0.6383	0.558	0.7541	0.837	0.5409	0.9781	1.7267	2.0849	1.0067	0.5472	0.5037	0.5528	0.8752	1.106	0.725	1.025	1.3735	0.68	0.9461	0.8439	0.8993	0.6519	0.4661	0.4811	0.7774	0.6909	0.3904	1.0317	1.4156	0.9812	0.5661	0.7443	0.3596	0.8592	1.3241
aconitate [cis or trans]	Energy	TCA Cycle	46173	LC/MS Neg	100001359	580	173.009			C00417	HMDB00072	0.5365	0.6413	0.9687	2.3803	1.0514	0.8774	1.528	1.1931	1.4229	1.7304	2.0535	1.0193	2.1553	1.0523	1.2747	1.4455	0.9551	1.0638	1.3775	1.4208	0.8029	1.2924	1.2303	1.2554	1.5035	1.189	0.9994	1.3952	0.9612	0.988	0.6239	0.8395	1.0812	0.7876	0.9855	1.1016	1.2671	1.0235
adenine	Nucleotide	Purine Metabolism, Adenine containing	554	LC/MS Pos Early	880	2221	136.062	73-24-5	190	C00147	HMDB00034	0.4664	0.2012	0.2662	0.6131	0.8014	0.9463	1.0062	0.612	0.8522	0.5418	0.355	0.3123	0.3843	0.8451	1.1659	0.3831	0.6187	0.7829	0.7132	0.6096	0.8268	1.0768	0.7187	1.1649	0.3481	0.364	0.6266	0.5636	0.9028	1.2304	0.4646	0.247	0.2973	0.5806	0.6915	1.0414	1.7803	0.7335
adenosine	Nucleotide	Purine Metabolism, Adenine containing	555	LC/MS Neg	798	2075.4	134.047	58-61-7	60961	C00212	HMDB00050	1.0553	1.0897	0.8563	1.3365	1.1278	1.4295	0.9204	1.1555	1.0325	0.7244	0.8201	0.8663	0.9965	1.1312	0.9217	0.8482	0.9187	0.5596	0.7215	1.0572	1.4983	1.0838	0.9468	1.4032	0.6279	0.828	0.5912	0.9073	1.2909	1.3122	0.9418	0.9246	0.8415	1.2319	1.0109	1.1009	1.1864	0.7813
adenosine 3'-monophosphate (3'-AMP)	Nucleotide	Purine Metabolism, Adenine containing	35142	LC/MS Neg	100001449	1245	346.056	84-21-9	41211	C01367	HMDB03540	1.314	1.2577	1.1052	1.0615	1.1351	1.231	0.7798	0.9519	1.0046	1.2586	1.4222	1.258	1.7025	1.1286	1.4312	1.4021	1.5919	1.2135	1.1192	1.2926	1.0868	1.1251	1.0803	1.1082	1.4229	0.9215	0.7365	1.1709	1.0198	0.9886	1.2735	1.8647	1.0416	0.8398	1.3777	0.7795	0.5013	0.8914
adenosine 5'-monophosphate (AMP)	Nucleotide	Purine Metabolism, Adenine containing	32342	LC/MS Pos Early	209	1013	348.07	149022-20-8	6083	C00020	HMDB00045	0.921	0.998	0.2835	7.2669	6.5113	5.9467	1.3606	1.05	1.775	0.7632	0.2835	1.498	0.2835	1.0904	1.1886	0.2835	0.2835	0.7437	0.7279	0.2835	0.6226	0.3017	0.2835	1.3789	0.303	0.439	0.506	0.2835	0.9926	1.0917	1.5441	0.2835	0.8836	0.8205	0.2835	0.5103	1.3507	1.0505
adenosine-2',3'-cyclic monophosphate	Nucleotide	Purine Metabolism, Adenine containing	37467	LC/MS Neg	72	1793	328.045	37063-35-7	2024	C02353	HMDB11616	1.4206	1.5682	0.7398	1.0503	1.4262	1.9321	1.1928	1.2478	1.6854	0.7166	1.4434	1.1028	1.1544	0.8679	0.7665	1.386	1.7039	0.8991	1.3872	1.9008	1.6	1.7931	2.1075	1.6092	0.4826	0.4391	0.3034	1.0839	0.661	0.6661	1.1073	2.8774	1.0348	1.1297	1.62	1.5687	1.013	2.1894
adipate	Lipid	Fatty Acid, Dicarboxylate	21134	LC/MS Polar	100000863	3000	145.051	124-04-9	196	C06104	HMDB00448	1.2845	0.345	0.9566	0.8806	0.7683	0.4663	1.0879	0.345	1.4768	1.2448	1.7804	1.0502	3.15	1.8523	2.0798	1.0757	0.7883	1.4337	0.8645	1.1826	0.8107	0.7436	0.345	1.572	2.304	1.765	1.5759	0.4727	0.345	0.4267	0.345	0.6291	1.1667	0.4224	0.6897	0.6533	0.9769	1.0823
alanine	Amino Acid	Alanine and Aspartate Metabolism	1126	LC/MS Polar	811	2780.3	88.0404	56-41-7	5950	C00041	HMDB00161	1.5621	1.1499	1.1387	0.9402	1.1697	1.462	1.1046	1.1613	1.0235	1.165	1.1109	1.3323	1.5782	1.6118	1.6995	1.0193	1.3503	1.0607	1.792	1.9162	1.4372	1.2977	1.2044	1.3922	1.3764	1.1737	1.3659	1.121	1.3325	1.8337	1.4969	1.7309	1.4696	1.2616	1.483	1.3029	0.9661	1.5064
alanylleucine	Peptide	Dipeptide	37093	LC/MS Pos Early	100001890	3055	203.139	1638-60-4	259583		HMDB28691	0.8245	2.673	3.7768	1.2442	2.3508	1.216	2.7116	1.5649	2.572	1.5294	2.6713	2.7532	2.7814	4.5982	3.3638	2.4358	1.1065	1.6423	1.2311	1.1832	1.7878	2.7661	2.8832	3.5002	3.1779	2.6085	2.1587	1.6496	1.5729	4.8558	1.0991	1.483	1.963	2.9131	1.0857	2.2057	0.8157	1.1142
allantoin	Nucleotide	Purine Metabolism, (Hypo)Xanthine/Inosine containing	1107	LC/MS Polar	1002	1672	157.037	97-59-6	204	C02350	HMDB00462	1.9807	1.38	1.6546	1.2863	0.9975	1.0796	1.3337	1.6295	0.6113	1.5442	1.5696	1.2243	3.3393	0.7272	1.132	0.8032	0.8023	0.565	2.1766	2.2414	1.0894	1.0287	1.0715	0.9447	0.8119	0.9535	0.818	0.7158	0.7374	0.9558	0.8844	1.0267	1.1948	0.9955	1.1356	1.4776	0.5362	1.0587
alpha-hydroxyisocaproate	Amino Acid	Leucine, Isoleucine and Valine Metabolism	22132	LC/MS Neg	100000706	1840	131.071	10303-64-7	83697	C03264	HMDB00746	1.9684	2.0478	2.1995	0.8476	0.4603	0.1206	1.4855	1.1696	1.1082	1.0299	1.0466	1.1051	1.4908	0.7213	1.4976	2.8063	1.3433	2.0819	0.7542	0.1206	0.4586	1.4189	2.2518	2.3138	3.4712	6.5554	7.0831	2.2245	3.9647	6.8278	0.7769	1.3262	2.8844	1	0.5333	2.6752	3.7451	4.0866
alpha-hydroxyisovalerate	Amino Acid	Leucine, Isoleucine and Valine Metabolism	46537	LC/MS Polar	100001300	1052	117.056	600-37-3	99823		HMDB00407	1.5898	1.6254	2.2052	1.9779	1.0229	0.5669	1.3584	1.4345	0.8179	0.9116	1.3231	0.7401	1.1842	0.7563	1.1032	2.0413	0.854	1.3676	0.9254	0.9139	0.4577	2.3335	3.221	1.8868	2.3423	4.5484	3.8161	1.3209	1.5451	2.9624	0.5005	0.6678	1.9954	0.6926	0.6717	2.0274	4.8241	4.344
alpha-ketoglutarate	Energy	TCA Cycle	528	LC/MS Polar	93	2700	145.014	305-72-6;328-50-7;22202-68-2	51	C00026	HMDB00208	1.6704	0.7891	0.0355	0.6695	1.7854	2.7616	0.9745	1.316	0.7898	1.6228	1.3357	1.1596	1.2075	1.3777	0.652	0.6283	2.1777	0.8157	2.1416	3.0132	2.2384	1.4533	1.4686	1.5386	0.4823	0.0852	0.4043	0.6781	0.7212	0.7051	1.7643	3.132	0.3532	1.2487	2.6768	0.9817	0.3423	0.8195
alpha-tocopherol	Cofactors and Vitamins	Tocopherol Metabolism	1561	LC/MS Pos Late	1105	2522	430.378	59-02-9;10191-41-0	14985	C02477	HMDB01893	0.9468	0.7956	0.643	0.6585	0.7723	1.0662	0.9625	1.2539	0.775	0.6967	0.5923	0.7124	0.8942	1.5063	0.974	0.9682	1.0502	0.7812	1.1029	1.5913	0.8842	1.1542	1.4668	1.4126	0.8786	1.2985	1.0603	0.8167	0.8877	1.2357	0.7488	0.5302	0.5282	0.8007	0.6282	0.9113	0.978	0.9596
alpha-tocotrienol	Cofactors and Vitamins	Tocopherol Metabolism	37502	LC/MS Pos Late	100001979	1986	424.334	58864-81-6	5282347	C14153	HMDB06327	0.8847	0.6781	0.7448	0.2961	0.7005	0.9463	0.594	0.8212	1.1599	0.2961	0.4987	0.5016	0.6649	1.788	0.9121	1.4072	1.9706	1.5702	1.0091	1.3339	1.066	1.4719	1.4798	2.2528	0.2961	0.6888	0.56	0.2961	0.2961	0.7713	2.0099	1.3103	1.8274	0.8502	0.6896	0.456	0.8764	0.9093
arabitol/xylitol	Carbohydrate	Pentose Metabolism	48885	LC/MS Polar	100006430	1932.4	151.061					1.9909	1.7501	1.6688	1.2494	1.2022	1.6893	1.0811	1.4252	1.4265	1.305	1.4671	1.3463	1.1013	1.0579	1.1615	0.7606	0.9618	0.6699	1.3721	1.7698	1.5272	1.1376	1.2319	1.2034	0.9137	1.2912	1.1788	1.1135	1.2319	1.5138	1.3872	1.8172	1.4326	1.0052	1.3252	0.9707	1.0152	1.5344
arabonate/xylonate	Carbohydrate	Pentose Metabolism	48255	LC/MS Polar	100006115	2664.6	165.04					0.9937	1.0081	1.7186	2.3433	1.3784	1.146	1.6439	0.9982	1.1021	1.102	0.8828	1.0166	1.4682	1.2805	1.2513	1.676	0.9692	0.9309	0.677	1.8139	0.7853	1.4575	1.1975	1.4718	1.1019	1.424	1.4715	0.8088	1.0637	0.723	0.9241	0.9311	1.2868	0.9177	1.036	0.8782	1.993	1.285
arachidate (20:0)	Lipid	Long Chain Fatty Acid	1118	LC/MS Neg	893	6295	311.296	506-30-9	10467	C06425	HMDB02212	0.9087	0.8583	0.6186	1.429	1.2581	1.8925	1.2052	1.3081	1.2811	0.9106	0.8755	0.4911	1.0973	1.0025	0.2931	1.1433	1.1061	1.1955	1.0897	1.4286	1.0409	1.1008	1.2504	1.0342	1.2237	0.8173	0.7655	0.9127	0.9018	0.4756	1.0723	0.922	1.1501	1.0175	0.857	0.4534	1.0279	0.977
arginine	Amino Acid	Urea cycle; Arginine and Proline Metabolism	1638	LC/MS Pos Early	231	2825	175.119	1119-34-2	232	C00062	HMDB00517	1.4491	1.1895	1.3217	0.9789	1.0396	1.0355	1.0892	1.0766	1.1721	1.1197	0.9504	1.1518	1.0752	1.1374	1.369	0.9541	1.0299	0.9487	1.1873	1.1495	1.1659	1.1742	1.0703	1.1951	1.1093	1.1451	1.1674	1.2361	1.3993	1.5013	1.1622	0.9296	1.1634	1.1431	1.0888	1.1904	1.0313	1.0523
argininosuccinate	Amino Acid	Urea cycle; Arginine and Proline Metabolism	15497	LC/MS Pos Early	232	2745	291.13	156637-58-0	16950;828	C03406	HMDB00052	2.4312	1.2645	0.8441	1.3444	1.2201	1.8509	1.0502	0.9873	0.97	0.4759	0.5553	0.6912	0.8526	0.7318	0.8834	1.1155	1.2074	1.4399	1.2891	0.9266	1.1933	1.1559	1.3717	2.0888	0.6125	0.7735	0.6697	0.5703	0.7111	1.6696	1.545	0.8759	1.1082	0.6467	0.433	0.5832	1.7259	1.8999
asparagine	Amino Acid	Alanine and Aspartate Metabolism	512	LC/MS Polar	917	2951.1	131.046	70-47-3	6267	C00152	HMDB00168	1.6558	1.6034	1.5872	0.8847	1.0175	1.2501	1.0639	1.403	1.4513	2.2362	1.7703	1.7999	1.6634	1.6035	1.9906	0.9803	1.5621	1.4102	1.8039	1.4777	1.4302	1.6024	1.5428	1.4657	2.3053	2.1581	2.0481	2.0388	2.4752	2.5777	1.8296	1.5935	1.8009	1.5709	1.3892	1.6637	0.6878	1.26
aspartate	Amino Acid	Alanine and Aspartate Metabolism	443	LC/MS Pos Early	234	1165	134.045	56-84-8	5960	C00049	HMDB00191	3.6555	1.3064	1.3079	1.8755	1.7831	0.6398	2.7714	1.7464	1.4514	1.2798	1.6231	0.3697	1.8222	1.5591	3.5143	1.1669	0.6016	0.9705	1.0132	0.3568	0.2465	0.7122	0.8257	1.749	1.9663	2.7235	2.5844	2.1269	2.7304	5.2457	1.2372	0.3908	0.6175	1.3286	1.2112	3.048	6.3723	2.1989
azelate (nonanedioate)	Lipid	Fatty Acid, Dicarboxylate	18362	LC/MS Neg	2029	1276	187.098	123-99-9	2266	C08261	HMDB00784	0.5805	0.6353	0.9663	1.3127	1.063	0.883	0.7315	0.7626	1.0223	0.5569	1.099	1.0122	1.2777	0.9455	0.8898	0.828	0.8481	0.7614	0.6485	0.7775	0.8257	0.848	0.8856	0.7044	0.7976	0.6937	0.977	0.5765	0.4412	0.5307	0.4981	0.9697	1.0092	0.5591	0.7631	0.919	0.6693	0.7529
benzoate	Xenobiotics	Benzoate Metabolism	15778	LC/MS Neg	100000008	1750	121.029	65-85-0	243	C00180	HMDB01870	0.8896	1.3141	1.8609	0.2257	0.791	0.6098	0.2257	0.2257	0.9564	0.2257	1.2995	1.3448	0.2257	0.2257	0.8267	1.059	1.1416	1.0285	0.8865	1.4422	0.2257	0.9638	1.0428	0.7564	1.3226	0.2257	0.8791	0.2257	0.2257	1.8235	0.8836	0.2257	1.0708	1.1964	1.1485	0.2257	0.9727	0.2257
beta-alanine	Nucleotide	Pyrimidine Metabolism, Uracil containing	55	LC/MS Pos Early	244	1939	90.055	56-41-7;107-95-9	239	C00099	HMDB00056	1.0865	0.9823	0.5799	1.1438	1.0463	1.1243	1.0333	0.9153	1.0478	1.0332	1.0507	1.0125	0.269	0.9108	0.8421	0.5865	0.9384	1.0141	0.9031	0.5936	0.8207	1.0551	0.6818	1.0464	0.8019	0.8627	1.0979	0.2496	1.1865	1.1936	1.0081	0.9131	1.0593	0.8777	0.7398	0.9968	1.2423	1.1335
beta-hydroxyisovalerate	Amino Acid	Leucine, Isoleucine and Valine Metabolism	12129	LC/MS Polar	1442	1149.8	117.056	625-08-1	69362		HMDB00754	0.1952	1.341	1.0895	0.1952	0.1952	0.1952	0.761	0.6329	0.6922	0.1952	1.3087	0.7695	0.8345	0.1952	0.1952	1.9134	1.6229	1.9313	0.1952	0.1952	0.1952	1.1886	1.0351	0.9042	1.2411	1.706	1.272	1.4751	1.1482	0.1952	0.1952	1.067	0.8772	0.1952	0.1952	0.1952	0.1952	1.3402
betaine	Amino Acid	Glycine, Serine and Threonine Metabolism	3141	LC/MS Pos Early	799	1064	118.086	107-43-7	247	C00719	HMDB00043	2.4163	2.8191	0.322	2.0595	2.0158	1.2022	1.5268	1.2218	1.2009	0.7772	1.0195	0.7857	0.9106	0.9768	1.1479	0.322	0.322	1.0557	0.731	0.322	0.8653	0.3838	0.9734	2.0663	0.322	0.322	1.7791	0.322	1.775	2.6876	1.6893	1.2444	2.6558	1.2712	0.322	2.7795	2.3027	1.2653
beta-sitosterol	Lipid	Sterol	27414	LC/MS Pos Late	100001033	3054	397.383	83-46-5	222284	C01753	HMDB00852	0.9696	0.901	1.0414	0.959	1.1569	1.1127	0.7069	0.8526	1.0383	1.2061	1.2146	1.3834	0.6887	1.046	0.9231	0.9138	0.9632	1.0137	0.8653	0.7935	0.8499	0.77	0.7861	1.1548	0.5949	0.7346	0.9356	0.905	0.9105	1.2178	1.3137	0.933	1.0751	0.9588	1.0256	1.4042	0.8087	1.0849
biliverdin	Cofactors and Vitamins	Hemoglobin and Porphyrin Metabolism	2137	LC/MS Pos Late	250	1016	583.255	55482-27-4;55482-27-4	5353439	C00500	HMDB01008	1.4351	1.401	1.1503	1.7939	0.7482	1	1.3811	1.3499	1.3708	1.0789	1.3593	1.2808	1.7007	1.8472	1.6146	0.8629	0.8848	1	0.9638	1.5113	1.1704	1.2473	1.5107	1.1709	1.416	1.2381	1.5839	1.0311	1.2964	1.1176	1.1385	1.0011	0.9359	0.845	0.8083	1.1985	0.9575	0.6695
biopterin	Cofactors and Vitamins	Tetrahydrobiopterin Metabolism	12358	LC/MS Neg	1548	1398.5	236.079	22150-76-1	445040	C06313	HMDB00468	0.6159	0.7118	0.7782	0.7822	0.7555	0.6735	0.7653	0.7722	0.7475	1.3768	1.3544	1.3238	1.0686	0.8836	1.0182	0.6827	0.6576	0.6528	1.0679	0.9438	0.9021	0.6806	0.692	0.6613	0.6936	0.6963	0.7169	0.6608	0.7662	0.7004	0.5352	0.7004	0.5563	0.6681	0.6978	0.6476	0.7503	1.0006
biotin	Cofactors and Vitamins	Biotin Metabolism	568	LC/MS Pos Early	251	2253	245.095	58-85-5	171548	C00120	HMDB00030	2.4583	2.2997	1.3933	0.8955	0.8985	1.7138	1.3071	1.4145	1.632	0.7927	0.8796	1.8015	0.1736	1.2501	1.5789	1.4958	1.8063	2.1508	1.7352	1.123	2.2041	1.1483	1.1013	2.0205	0.8939	1.2614	1.5314	0.1736	1.724	1.8567	2.8179	1.5533	1.8428	1.1213	0.3771	0.9125	1.4397	1.2496
campesterol	Lipid	Sterol	33997	LC/MS Pos Late	100001269	2873	383.367	474-62-4	173183	C01789	HMDB02869	0.7268	0.6267	0.6419	0.9738	0.9995	0.9224	0.6923	0.8944	0.6729	0.747	0.6829	0.7281	0.874	1.2214	0.8174	0.8144	0.8184	0.9539	0.9501	0.9711	1.0631	0.7726	0.872	1	0.7569	0.9369	1.0379	0.8966	0.831	0.6221	1.1642	0.9309	0.994	0.7871	0.5689	0.1958	0.9592	0.9833
caprate (10:0)	Lipid	Medium Chain Fatty Acid	1642	LC/MS Neg	888	5090.7	171.139	112-37-8	2969	C01571	HMDB00511	1.109	1.4013	1.4834	0.7022	0.6386	0.7477	1.087	0.8631	0.911	0.7448	0.6392	0.8693	0.5852	1.1104	0.872	1.2135	1.1015	1.519	0.8078	0.7758	0.8326	0.753	0.9778	0.8089	0.9015	0.8402	1.0158	1.1733	0.7706	0.9255	0.8834	1.0305	0.9872	0.7242	0.8345	0.8067	0.6863	0.8416
carboxyethyl-GABA	Amino Acid	Glutamate Metabolism	40007	LC/MS Pos Early	100003260	2085	176.092	4386-03-02	2572		HMDB02201	3.1257	2.1142	2.0503	3.1764	1.0904	0.8536	3.726	0.7147	1.3307	0.9141	1.2285	0.7302	2.0119	0.8067	1.9308	2.2376	0.1042	1.5582	1.0875	0.4928	0.7845	1.5719	1.5697	1.4362	1.2546	2.0479	2.947	0.9975	2.3477	2.461	0.9856	0.4904	1.8302	0.7324	0.2357	2.0712	3.8833	1.5391
carnitine	Lipid	Carnitine Metabolism	15500	LC/MS Pos Early	100000007	1978	162.112	461-05-2	10917	C00318	HMDB00062	0.9843	0.8724	0.53	0.6708	0.6405	0.9255	1.1221	0.569	1.1965	1.0449	0.995	1.1718	0.5034	0.9244	0.8914	0.6934	0.3643	1.0782	1.0729	0.9358	0.6963	0.1875	0.2773	0.7815	0.4711	0.3913	0.8219	0.7418	1.0207	0.8898	1.0875	0.8683	0.4904	1.2061	0.3926	0.8917	1.2	0.9889
choline	Lipid	Phospholipid Metabolism	15506	LC/MS Pos Early	1256	1961	104.107	67-48-1	305	C00114	HMDB00097	1.3009	1.1521	0.7924	0.82	0.8688	0.949	1.0894	0.5948	1.0742	0.834	0.8562	0.8869	0.9094	1.2001	1.0832	0.4362	0.6474	1.2488	1.0277	0.8967	0.77	0.312	0.126	1.0166	0.958	0.8919	1.324	0.9901	1.1332	1.2374	1.1883	1.0077	0.7808	1.2955	0.9711	1.5608	0.8164	0.8155
choline phosphate	Lipid	Phospholipid Metabolism	34396	LC/MS Pos Early	267	700	184.073	72556-74-2	1014	C00588	HMDB01565	1.111	1.0016	0.91	0.7009	0.6672	0.778	1.2596	1.284	1.2558	1.0401	1.0839	1.1217	1.0427	1.289	1.0311	1.6097	1.7336	1.788	0.8908	0.9499	0.9869	1.4718	1.4216	1.167	0.8275	1.0466	1.0273	0.9984	1.3211	1.1853	1.2033	1.282	1.2359	1.5358	1.6405	1.6712	0.9091	1.0346
citraconate/glutaconate	Energy	TCA Cycle	47076	LC/MS Polar	100006438	2600	129.019					1.4019	0.6325	0.4107	1.1794	2.6773	4.0326	1.0344	1.1811	1.1356	1.5849	1.2149	1.9355	0.9333	1.8397	1.4485	0.5439	1.4834	0.962	2.1986	2.5613	2.8795	1.097	0.9342	1.5409	0.3752	0.4278	0.7108	0.5158	0.9343	1.1693	1.4132	1.4105	0.6114	1.1631	1.5452	0.8952	0.3837	0.6506
citrate	Energy	TCA Cycle	1564	LC/MS Neg	1124	582	191.02	77-92-9	311	C00158	HMDB00094	0.1472	2.4315	2.074	4.3578	3.2851	0.7753	6.9457	3.3619	4.2069	0.9308	4.2679	2.4136	4.6121	1.3634	1.1696	0.5	0.3153	0.8144	0.2727	0.2932	0.7769	3.1199	4.6791	3.4108	0.3588	0.9937	2.0124	0.1635	0.2808	0.483	0.1757	0.8281	0.8766	0.8595	0.1956	3.5597	0.2894	1.8785
citrulline	Amino Acid	Urea cycle; Arginine and Proline Metabolism	2132	LC/MS Pos Early	391	1520	176.103	372-75-8	9750	C00327	HMDB00904	1.7645	1.3373	0.5258	5.2475	2.9572	4.4153	1.2919	0.6437	1.3693	0.9226	0.8741	1.5623	0.1659	0.8126	0.7167	0.2877	0.1529	0.8855	0.693	0.5136	0.7875	0.6474	0.4564	2.8426	0.3186	1.2261	2.4092	0.8096	5.0297	10.887	1.7569	1.2962	1.1106	1.0616	0.1529	3.0431	3.2593	2.3397
cystathionine	Amino Acid	Methionine, Cysteine, SAM and Taurine Metabolism	15705	LC/MS Pos Early	310	2270	223.075	535-34-2	439258	C02291	HMDB00099	1.4172	1.2325	1.1883	0.8171	0.8987	0.9577	0.6088	0.5807	0.7507	0.6522	0.8675	1.0648	0.5086	1.1422	1.5242	0.713	0.9264	0.8713	0.874	0.8957	0.9074	0.5477	0.5856	0.9221	0.7459	0.9688	0.723	0.5092	1.0436	0.7759	1.3552	1.0442	1.0194	0.6387	0.6543	0.8818	1.8041	2.1515
cysteine	Amino Acid	Methionine, Cysteine, SAM and Taurine Metabolism	1868	LC/MS Pos Early	800	1488	122.027	52-90-4;56-89-3	5862	C00097	HMDB00574	1.7705	1.284	0.8908	0.6642	0.5349	0.733	0.5479	0.5809	0.4479	0.4267	0.1937	0.4054	0.2243	0.6001	0.5048	0.4179	0.6046	0.892	1.361	0.8276	1.1163	0.3522	0.3139	0.5805	0.362	0.2759	0.572	0.4757	1.4131	0.9091	1.817	1.0887	1.2305	0.5211	0.4482	0.9002	0.937	0.6005
cysteinylglycine	Amino Acid	Glutathione Metabolism	35637	LC/MS Pos Early	278	2132	179.048	19246-18-5	439498	C01419	HMDB00078	2.4056	1.4031	1.443	1.2728	1.6613	1.0564	1.0115	0.8187	0.6476	0.8324	0.9101	0.915	0.7872	1.3474	0.8149	1.5014	2.6214	1.2594	1.4301	1.7428	1.2872	0.9797	1.3921	1.082	0.4736	0.7593	0.767	0.8648	1.1351	1.3459	2.0688	2.0478	1.0541	1.8287	2.233	1.9509	1.4263	0.7864
cystine	Amino Acid	Methionine, Cysteine, SAM and Taurine Metabolism	56	LC/MS Neg	279	665	239.017	56-89-3	67678	C00491	HMDB00192	0.1362	0.4272	0.2489	1.353	0.7871	0.6607	0.0523	0.0523	0.1418	0.4136	0.7844	0.6559	0.2598	0.5189	0.0935	0.4265	0.5494	0.2031	0.6144	0.74	0.7184	0.2088	0.2683	0.0562	0.5382	0.4014	0.2	0.1589	0.3771	0.0523	0.1503	0.6158	0.3034	0.1581	0.209	0.3786	0.0925	0.3445
cytidine	Nucleotide	Pyrimidine Metabolism, Cytidine containing	514	LC/MS Pos Early	827	2124	244.093	65-46-3	6175	C00475	HMDB00089	2.2217	1.824	1.6346	1.2049	1.6276	1.6651	2.2979	2.1887	2.0102	1.7563	1.1875	1.5442	2.0614	2.1462	1.8502	1.8322	1.503	1.6205	2.5656	2.2234	2.3526	2.1365	1.3506	2.1556	2.0891	1.5923	1.94	1.8103	2.101	1.9324	2.1187	1.3656	1.8889	1.8802	1.1476	1.5335	2.2894	1.6842
cytidine 2',3'-cyclic monophosphate	Nucleotide	Pyrimidine Metabolism, Cytidine containing	37465	LC/MS Neg	73	937	304.034	15718-51-1	417654	C02354	HMDB11691	1.7796	2.3538	2.2137	1.2121	1.6033	1.8767	1.2328	1.3403	1.6342	1.4553	1.9647	1.7945	1.8116	1.5341	1.4636	2.4144	1.9876	1.7739	1.6616	1.6669	1.7957	2.2023	2.3206	2.1241	2.1792	1.5761	1.4868	1.5164	1.2065	1.4301	1.503	2.5711	1.5992	1.5814	1.6956	2.0807	1.3886	2.3206
cytidine 3'-monophosphate (3'-CMP)	Nucleotide	Pyrimidine Metabolism, Cytidine containing	2959	LC/MS Pos Early	105	920	324.059	84-52-6	66535	C05822		3.3655	4.5224	1.6146	2.5921	2.0398	3.8556	1.7102	1.4499	3.2952	0.9177	1.9532	2.0275	0.5705	1.9293	2.0066	0.8124	1.038	2.886	1.7811	0.6188	1.8216	0.7354	0.8584	3.7352	0.47	0.9063	1.3569	0.686	2.1256	2.4369	3.8779	1.702	1.6072	1.9063	0.5571	1.0791	2.6831	1.4376
cytidine 5'-diphosphocholine	Lipid	Phospholipid Metabolism	34418	LC/MS Pos Early	1220	725	489.115	33818-15-4	13804	C00307	HMDB01413	0.2731	1.7215	0.7416	0.2731	2.2048	2.067	1.5633	1.3599	2.8627	1.026	0.9903	1.3516	0.2731	0.748	0.349	0.4891	0.2731	0.662	1.9716	1.311	3.8028	0.2731	0.2731	1.704	0.2731	0.2731	0.2731	0.2731	0.2731	0.2731	0.2731	1.1972	0.6172	0.2731	0.2731	0.2731	0.2731	2.5145
cytidine 5'-monophosphate (5'-CMP)	Nucleotide	Pyrimidine Metabolism, Cytidine containing	2372	LC/MS Pos Early	282	835	324.059	63-37-6	6131	C00055	HMDB00095	0.6443	0.3177	0.3177	5.1908	7.3409	10.9854	0.6454	1.0526	1.8608	0.3177	1.2524	1.0822	0.3177	0.4024	0.3177	0.3177	0.3177	0.7081	0.6412	0.3177	0.973	0.3177	0.3177	1.1168	0.3177	0.3177	0.3177	0.3177	0.3177	0.7407	1.2514	1.2396	1.653	0.3177	0.3177	0.3177	1.1409	1.3702
cytidine-5'-diphosphoethanolamine	Lipid	Phospholipid Metabolism	34410	LC/MS Pos Early	100001407	707	447.068	72842-05-8	123727	C00570	HMDB01564	1.0607	1.392	0.8015	2.0915	3.4127	3.601	1.871	2.3487	2.7314	1.3326	1.4082	1.9862	0.5232	0.6457	0.8722	1	0.7933	1.0041	1.5388	1.2888	2.7946	0.9047	0.4801	2.6082	0.4885	0.3698	0.7933	0.1349	1.4008	0.8587	0.998	2.0148	1.8762	0.2774	0.1349	0.1349	1.2265	2.7023
cytosine	Nucleotide	Pyrimidine Metabolism, Cytidine containing	573	LC/MS Pos Early	881	2060	112.051	71-30-7	597	C00380	HMDB00630	5.3563	12.4184	4.8156	1.9156	1.768	0.1672	0.4062	0.7647	0.5657	0.6817	1.0049	1.3706	0.5779	0.6431	0.8825	2.7721	0.3792	2.2063	0.1672	0.2771	0.1672	2.1096	2.7282	3.7368	5.1053	6.6395	11.4882	3.9029	7.5355	10.7194	0.575	1.2536	4.4213	1.9465	0.9557	7.1979	8.9101	4.4142
dehydroascorbate	Cofactors and Vitamins	Ascorbate and Aldarate Metabolism	1659	LC/MS Polar	301	1130	173.009	490-83-5	835	C05422	HMDB01264	0.6989	0.6516	0.784	1.058	1.8069	1.6561	0.9521	0.1866	0.5091	0.1386	0.4975	0.6604	0.1386	0.4186	0.6263	0.1386	0.2029	0.1461	1.4266	1.3578	1.3164	0.5317	0.4709	0.9239	0.1386	0.1386	0.4365	0.3212	0.1386	0.4	0.7072	0.1864	0.756	0.1386	0.1386	0.3428	0.2982	0.3197
deoxycarnitine	Lipid	Carnitine Metabolism	36747	LC/MS Pos Early	100001662	2052	146.118	6249-56-5	134	C01181	HMDB01161	0.8521	0.5357	0.4839	1.3495	1.5421	1.8813	1.1846	1.2774	1.8922	1.2328	1.172	1.4833	0.7308	1.5835	1.6975	0.5918	0.254	0.5848	1.4071	1.341	1.5186	0.7775	0.6674	2.1234	0.7528	0.254	0.6635	0.7081	1	0.7976	2.3539	1.641	2.0251	1.6772	1.1304	1.3256	2.2721	2.0711
dihomo-linoleate (20:2n6)	Lipid	Polyunsaturated Fatty Acid (n3 and n6)	17805	LC/MS Neg	1231	5730	307.264	2091-39-6	6439848	C16525	HMDB05060	2.7837	3.5006	1.6326	2.8026	3.7902	6.1642	2.5755	2.6495	3.4412	2.2561	2.5064	1.3931	2.6382	3.2051	0.6957	3.1561	3.9501	4.5916	3.848	7.1689	4.645	3.2946	4.482	3.78	2.679	3.1785	2.7887	2.1301	2.9	1.6437	3.3421	3.8707	5.155	1.7424	2.1751	0.9383	2.5001	2.7455
dihydoxyphenylalanine (L-DOPA)	Amino Acid	Phenylalanine and Tyrosine Metabolism	1576	LC/MS Pos Early	1129	2215	198.076	59-92-7;63-84-3	6047	C00355	HMDB00181	1.0762	0.958	1.2485	0.2051	0.5434	0.3515	0.5884	0.5866	1.0393	0.5688	0.3517	0.483	0.2298	0.7659	1.5271	0.1824	0.2715	0.4788	0.7935	0.4614	0.9946	0.395	0.7179	1.7477	1.429	0.4923	0.9926	1.3835	2.6965	6.3372	0.8628	0.6783	1.5149	1.1598	0.1951	0.8015	0.2113	0.2643
dihydrobiopterin	Cofactors and Vitamins	Tetrahydrobiopterin Metabolism	35129	LC/MS Neg	100001506	1552.3	194.068	6779-87-9	1879	C00268	HMDB00038	0.7025	0.6952	0.6546	0.7014	0.6895	0.6765	0.7508	0.5356	0.774	0.7246	0.9034	0.9223	0.8204	0.8082	0.9299	0.6511	0.6094	0.6024	0.8596	0.9002	0.8921	0.8458	0.8927	0.74	0.7924	0.6964	0.8628	0.6865	0.6302	0.6624	0.6161	0.7105	0.7072	0.5526	0.6008	0.712	0.8906	1.0022
dihydroxyacetone phosphate (DHAP)	Carbohydrate	Glycolysis, Gluconeogenesis, and Pyruvate Metabolism	15522	LC/MS Pos Early	309	539	171.005	102783-56-2	668	C00111	HMDB01473	1.8637	0.7094	0.0993	0.77	0.2105	0.5596	0.9026	0.7865	0.6182	0.2816	0.893	0.8234	0.0993	0.557	1.4273	0.2667	0.252	0.449	0.4086	0.1381	0.1866	0.0993	0.4249	0.785	0.8066	0.0993	1.8937	1.2646	1.6549	1.2177	2.3721	0.6095	1.661	2.3496	1.848	0.8125	0.8112	0.4874
dimethylarginine (SDMA + ADMA)	Amino Acid	Urea cycle; Arginine and Proline Metabolism	36808	LC/MS Pos Early	100001810	2850	203.15	102783-24-4	123831	C03626	HMDB01539	2.0259	1.6236	1.6615	0.9094	1.0984	1.0898	1.243	1.3302	1.3221	1.7247	1.3886	1.7388	1.3181	1.64	1.5457	0.9717	1.0746	1.0234	2.0117	1.6991	1.7754	1.1137	1.1439	1.8002	1.309	1.3239	1.2465	1.5986	1.9797	1.9186	2.0357	1.6252	1.7306	1.7813	1.6507	1.5617	1.0701	0.9919
docosadienoate (22:2n6)	Lipid	Polyunsaturated Fatty Acid (n3 and n6)	32415	LC/MS Neg	100001182	6034	335.296	7370-49-2	5282807	C16533	HMDB61714	1.1016	1.1681	0.9715	1.4974	1.2563	3.0762	0.8212	1.1713	1.7687	1.189	1.396	0.8312	1.2835	1.1678	0.2941	1.2359	2.1897	2.0808	0.8522	5.0488	3.9234	0.8673	2.5938	2.0781	1.4199	1.8125	1.3025	0.7605	1.2122	0.7318	0.7652	1.5261	2.0977	1.1431	0.7992	0.0752	1.4045	1.333
dodecanedioate	Lipid	Fatty Acid, Dicarboxylate	32388	LC/MS Neg	100001102	2990	229.145	693-23-2	12736	C02678	HMDB00623	3.9426	2.112	2.9127	0.6557	0.8354	0.6783	1.4813	0.9596	0.995	1.9475	1.7832	1.7478	1.4387	1.1879	1.4822	1.7191	1.4797	1.8587	1.5139	1.4717	1.1487	1.0075	0.8436	0.9082	5.3784	4.4679	5.1133	1.6373	1.9673	3.2035	1.2084	1.0514	1.2127	1.0222	1.1886	1.6183	1.5549	1.4076
eicosenoate (20:1)	Lipid	Long Chain Fatty Acid	33587	LC/MS Neg	100001335	5950	309.28		5282768		HMDB02231	0.9145	0.9444	0.5664	1.0001	1.0454	1.5787	1.0901	1.1127	1.2378	0.8957	0.7899	0.4293	0.9548	0.837	0.233	1.0395	1.1438	1.2557	0.9062	1.1194	0.7747	0.9778	0.997	0.936	1.0938	0.8437	0.6633	0.8928	0.7808	0.4463	1.0998	0.9085	1.1796	0.9045	0.7795	0.3829	0.9573	0.8997
ergosterol	Lipid	Sterol	27553	LC/MS Pos Late	100001020	2420	379.336	57-87-4	444679	C01694	HMDB00878	0.7776	0.7996	0.804	1.051	1.165	1.2663	0.8837	1.0875	0.7942	1.0932	1.0098	0.7358	0.8547	1.2066	1.1451	0.9007	0.9217	0.7655	1.0472	0.9741	0.869	0.9323	0.8689	1.022	0.8438	0.9634	1.018	0.9437	0.8439	0.9767	1.2635	0.9535	0.9598	0.8741	0.805	0.8147	0.8441	0.9369
ergothioneine	Xenobiotics	Food Component/Plant	37459	LC/MS Pos Early	100002154	850	230.096	58511-63-0	3032311	C05570	HMDB03045	1.2529	1.1854	0.0793	3.4447	2.3082	2.0994	0.766	0.694	0.8096	0.3041	0.3938	1.222	0.0793	0.959	0.0793	0.3422	0.6137	0.8802	0.6488	0.0793	1.6476	0.0793	0.0793	0.7765	0.089	0.0793	0.0793	0.2696	1.5306	0.8745	1.0395	0.7371	0.5588	0.4941	0.0793	0.7484	1.0548	0.8367
erucate (22:1n9)	Lipid	Long Chain Fatty Acid	1552	LC/MS Neg	1087	6355.6	337.311	112-86-7	5281116	C08316	HMDB02068	0.8145	0.7807	0.576	0.947	0.9994	1.3035	0.8905	0.8413	1.1694	0.777	0.7795	0.865	0.8631	0.7684	0.2267	0.8728	0.8545	0.6522	0.8464	1.048	0.7002	0.8106	1.2109	0.9896	0.9355	1.0321	0.5603	0.8738	0.8564	0.5048	0.8753	0.6642	0.8143	0.8986	0.6815	0.2997	0.9118	0.6583
erythritol	Xenobiotics	Food Component/Plant	20699	LC/MS Polar	100000846	1491	167.056	149-32-6	222285	C00503	HMDB02994	1.1488	0.6024	0.678	2.0708	1.275	0.2803	1.4217	0.7852	0.7046	1.0019	1.9464	0.5799	1.9728	0.9485	0.5861	1.0523	0.6629	0.2803	1.1653	1.2294	0.2803	1.0449	1.3799	0.9374	1.2526	1.3144	1.2109	0.9018	0.7459	0.9887	0.2803	0.7216	0.9913	0.7945	0.7626	0.9411	1.6212	1.8122
erythronate*	Carbohydrate	Aminosugar Metabolism	42420	LC/MS Polar	100001320	2186	135.03	88759-55-1	2781043		HMDB00613	0.9418	1.0529	1.7694	1.6931	1.0879	0.9289	1.3587	1.2182	1.0692	1.1127	1.4869	0.9147	1.4068	1.1358	1.2253	1.2832	0.8605	1.0844	1.1736	1.4516	0.7488	1.227	1.3405	1.4063	1.5944	2.8641	2.6544	0.9482	1.2961	2.0414	0.6976	0.795	1.3168	0.9353	1.0777	1.1728	1.8039	1.0765
ethylmalonate	Amino Acid	Leucine, Isoleucine and Valine Metabolism	15765	LC/MS Polar	2054	2785	131.035	601-75-2	11756		HMDB00622	1.3572	1.4463	1.7079	0.6677	0.5475	0.5173	2.5746	2.4021	1.9509	2.9775	3.7942	3.0847	1.5067	0.9678	0.913	1.292	1.0234	1.0501	1.0508	1.6509	2.1338	1.1301	1.2218	0.7471	1.7319	3.4571	3.7842	0.8201	0.7807	1.2427	0.6755	2.0312	1.614	0.4718	0.5593	0.7061	0.6306	0.9763
flavin mononucleotide (FMN)	Cofactors and Vitamins	Riboflavin Metabolism	15797	LC/MS Neg	100000251	2390	455.097	130-40-5	710	C00061	HMDB01520	1.187	1.0585	0.9856	1.0613	1.162	1.1542	1.2296	1.1727	0.9812	0.8624	0.724	1.0639	0.696	0.8937	0.7774	0.7583	0.6519	0.7817	0.8522	0.9988	1.2252	1.0165	0.8109	1.1643	1.2025	1.2504	1.4748	0.743	0.905	0.9131	0.944	1.0497	1.118	1.3194	0.948	1.2068	1.1876	1.0396
fructose	Carbohydrate	Fructose, Mannose and Galactose Metabolism	48195	LC/MS Polar	878	2022.2	225.062	57-48-7	5984	C00095	HMDB00660	0.7422	0.5565	1.0633	1.8337	1.0613	0.7163	1.3671	1.3599	1.0016	1.1479	1.8767	0.6882	1.6802	1.102	1.1227	1.6255	0.7995	0.8339	1.2453	1.492	0.6587	1.4919	1.1949	1.0448	1.9647	0.9263	0.6676	1.0635	0.4417	0.7177	0.5299	0.5851	0.7166	0.8007	0.8334	0.6244	1.9207	1.6141
fumarate	Energy	TCA Cycle	1643	LC/MS Polar	330	3084	115.004	100-17-8	444972	C00122	HMDB00134	0.9454	1.2731	0.9242	1.5431	1.2346	1.8272	0.9363	0.9033	1.057	1.7942	1.4869	1.7661	1.3499	1.5789	1.7268	0.9304	1.2809	1.5122	1.108	1.2004	1.2681	1.3771	1.1823	1.6808	1.101	1.2955	1.5106	1.3946	1.6274	1.6427	1.4913	0.9686	1.5021	1.6294	1.8088	1.5249	0.7819	0.8461
galactonate	Carbohydrate	Fructose, Mannose and Galactose Metabolism	27719	LC/MS Polar	100001026	3085	195.051	299-28-5	128869	C00880	HMDB00565	2.594	1.1523	0.5354	3.8254	0.9795	0.9764	3.5056	1.7499	1.1791	1.2839	0.0282	0.6648	0.0282	1.6268	1.6802	7.5187	1.9029	1.7489	2.1641	2.6875	0.3416	0.9995	0.0282	1.5559	2.8575	3.0626	1.183	2.4237	0.8028	1.1858	0.4929	0.0282	1.2707	0.2686	0.3465	1.8831	5.3559	0.0282
galactose 1-phosphate	Carbohydrate	Fructose, Mannose and Galactose Metabolism	15706	LC/MS Polar	100000300	4552	259.022	19046-60-7	123912	C00446	HMDB00645	1.6963	0.9402	0.852	0.9868	1.0023	0.9558	1.1017	0.9348	1.2059	1.3163	1.0469	1.1447	0.7196	0.9531	0.8806	1.1709	1.2508	1.0259	1.2153	1.3406	1.3429	1.1937	1.2785	1.1754	0.9257	1.3012	1.0337	0.9588	1.2665	0.3346	1.2595	1.2674	0.9577	0.6732	0.9365	1.3064	1.0504	1.2766
gamma-aminobutyrate (GABA)	Amino Acid	Glutamate Metabolism	1416	LC/MS Pos Early	141	2048	104.071	56-12-2	119	C00334	HMDB00112	1.0363	0.7466	0.8593	1.0404	0.9812	0.9133	0.9254	0.7865	0.8163	0.8986	1.0355	0.923	0.5871	0.7117	0.7707	0.9985	0.2735	0.9139	0.9414	0.8739	0.9302	0.6855	0.639	0.6742	0.9894	0.5432	0.8348	0.871	1.0492	0.9267	0.9756	0.9032	1.2222	0.9934	0.6747	1.0795	1.155	0.9834
gamma-glutamylalanine	Peptide	Gamma-glutamyl Amino Acid	37063	LC/MS Pos Early	100001843	1986	219.098	5875-41-2	440103		HMDB29142	0.7586	1.072	0.6743	1.7998	1.7338	1.3037	0.1837	0.1636	0.2164	0.3778	0.5756	0.7966	0.3854	1.6492	1.2168	0.5831	0.2807	1.0012	0.9994	0.4172	0.7843	0.1636	0.6042	1.0092	0.4819	0.5204	0.6941	0.4551	1.1289	0.8559	1.7236	1.1583	0.9263	1.726	0.6041	1.3655	1.22	1.3344
gamma-glutamylglutamate	Peptide	Gamma-glutamyl Amino Acid	36738	LC/MS Pos Early	331	1775	277.103	1116-22-9	92865	C05282	HMDB11737	1.1263	1.2385	0.5943	1.4094	1.1945	1.1128	0.549	0.267	1.0355	0.2048	0.3218	0.7137	0.2048	0.8828	1	0.592	0.4533	1.5512	0.8198	0.412	0.6818	0.2048	0.2048	2.086	0.2048	0.2048	0.2048	0.2048	1.2141	2.1031	2.0985	0.9323	0.824	1.2063	0.4274	0.6909	1.5522	1.2988
gamma-glutamylglutamine	Peptide	Gamma-glutamyl Amino Acid	2730	LC/MS Pos Early	1140	1430	276.119	10148-81-9	150914	C05283	HMDB11738	0.3777	0.4142	0.1166	2.3322	1.8975	1.5263	0.0468	0.0468	0.0468	0.9446	0.9186	1.0345	0.0468	0.136	0.1082	0.0468	0.0468	0.1454	1.2271	0.4723	1.0636	0.3875	0.5121	1.3861	2.3307	1.9377	2.9188	0.4425	1.5299	1.8244	2.459	1	1.4098	1.2287	0.249	0.7352	7.2273	3.8338
gamma-glutamylhistidine	Peptide	Gamma-glutamyl Amino Acid	18245	LC/MS Pos Early	1235	2740	285.119	37460-15-4	7017195			1.5098	1.7989	1.2164	1.4358	1.2007	1.4171	0.7795	0.8369	0.8046	0.4256	0.5448	0.6697	0.4428	0.9576	0.8169	0.6733	0.7323	1.0985	1.0041	0.7376	1.2119	0.8142	0.7654	1.3235	0.7435	1.063	1.1807	0.6274	1.643	1.6038	1.5009	1.0977	1.6338	1.7869	0.9081	1.9407	1.6776	1.6355
gamma-glutamylisoleucine*	Peptide	Gamma-glutamyl Amino Acid	34456	LC/MS Pos Early	100001485	2940	261.144		14253342		HMDB11170	1.303	0.8753	0.8674	1.18	1.0403	1.088	0.2659	0.2659	0.2659	0.2659	0.2659	0.2659	0.2659	0.2659	0.2659	1.0235	2.2492	1.9988	0.4651	0.2659	0.6833	0.2659	0.2659	0.7799	0.2659	1.5428	1.4575	0.2659	1.6136	0.2659	2.0548	0.2659	0.8382	0.6234	0.9209	1.0577	0.907	1.1587
gamma-glutamylleucine	Peptide	Gamma-glutamyl Amino Acid	18369	LC/MS Pos Early	1268	2991	261.144	2566-39-4	151023		HMDB11171	2.0309	1.2786	1.2925	1.0311	1.0181	0.9015	0.1685	0.4475	0.7265	0.7442	0.8466	0.7539	1.1131	1.4167	1.5558	1.9647	1.4246	1.4096	1.4096	1.2266	0.8777	0.7704	0.8399	1.4122	2.0889	2.2175	1.6919	0.1685	2.4815	2.523	1.8211	1.1459	1.4905	1.3665	1.2232	1.9259	1.3102	1.1522
gamma-glutamylmethionine	Peptide	Gamma-glutamyl Amino Acid	44872	LC/MS Pos Early	100001313	2640	279.101	17663-87-5	7009567		HMDB29155	0.2712	0.2712	0.2712	1.1584	0.9382	0.7196	0.2712	0.2712	0.2712	0.7709	0.2712	0.2712	0.2712	0.2712	0.2712	0.2712	0.2712	0.2712	0.598	0.2712	0.2891	0.2712	0.2712	0.6826	0.2712	4.9331	6.1854	0.2712	1.3098	1.5977	1.423	0.7896	1.0835	0.5119	0.2712	0.7765	6.5123	5.1152
gamma-tocopherol/beta-tocopherol	Cofactors and Vitamins	Tocopherol Metabolism	52473	LC/MS Pos Late	100008998	2384	416.364					1.5075	0.9951	0.7798	0.586	0.5876	1.1265	1.5152	1.7352	1.0506	0.693	0.4918	0.458	0.6038	1.177	0.7512	2.0669	2.1326	1.519	2.0599	2.5622	1.6671	2.2486	2.2422	2.3818	1.4412	1.5402	1.228	1.0049	1.1432	1.1427	1.3222	0.8423	1.1593	0.7229	0.5563	0.8012	1.4149	1.5857
gluconate	Xenobiotics	Food Component/Plant	587	LC/MS Polar	338	2922	195.051	527-07-1	10690	C00257	HMDB00625	2.2214	1.2045	5.4358	3.2865	1.9927	0.8605	3.3063	2.0171	1.7897	1.0292	2.9559	0.8891	3.0284	1.5858	3.3153	4.5353	1.4811	1.5463	1.6144	1.8378	0.367	1.6433	3.6553	1.9083	2.434	4.2559	2.0382	2.5697	1.2086	1.8489	0.4505	0.6052	1.0023	0.7831	1.0104	1.5506	4.7477	3.112
glucosamine-6-phosphate	Carbohydrate	Aminosugar Metabolism	580	LC/MS Polar	290	4521.5	258.038	3616-42-0	439217	C00352	HMDB01254	1.1698	1.441	0.9461	0.6315	0.6721	0.7123	1.2595	1.0018	1.545	1.2486	0.8341	0.89	0.3575	0.9481	0.8063	1.0262	1.2446	1.2906	1.0514	1.1537	1.1467	1.0964	0.9013	1.2294	0.5231	0.4935	0.7635	0.9839	1.118	0.5253	1.712	1.0817	1.6596	0.7594	0.518	0.5756	1.2047	1.2039
glucose	Carbohydrate	Glycolysis, Gluconeogenesis, and Pyruvate Metabolism	48152	LC/MS Polar	572	2342	225.062	50-99-7	79025	C00031	HMDB00122	1.8217	1.3397	1.1916	0.9162	0.7663	0.9905	0.9514	1.1621	0.7752	0.7376	0.8731	0.761	1.0868	0.8799	0.7482	1.088	1.455	1.2338	1.0108	1.3507	1.0211	1.2926	1.2649	1.2594	1.7007	1.6682	1.5684	1.211	1.2484	1.2142	1.3954	1.5856	1.3693	1.3314	1.6861	1.2889	0.9325	1.1885
glucose 1-phosphate	Carbohydrate	Glycolysis, Gluconeogenesis, and Pyruvate Metabolism	15561	LC/MS Polar	1233	4277	259.022	56401-20-8	65533	C00103	HMDB01586	1.2243	1.2398	0.7587	0.6475	0.5684	0.8351	1.0969	0.7759	1.5737	1.581	1.1465	0.8817	0.4732	0.747	0.7802	1.1389	1.3619	0.9876	1.0888	1.3433	0.9724	1.0715	1.0184	1.1828	0.6127	0.4385	0.6109	1.0745	0.8634	0.5404	1.527	1.3138	1.5268	0.5995	0.5731	0.6033	1.0193	1.2534
glucose 6-phosphate	Carbohydrate	Glycolysis, Gluconeogenesis, and Pyruvate Metabolism	31260	LC/MS Polar	291	4537	259.022	103192-55-8	5958	C00668	HMDB01401	1.4655	1.2366	0.7872	0.7734	0.6615	0.9151	1.4046	0.9186	1.98	1.6692	1.5267	0.8705	0.5372	0.8988	0.8475	1.3101	1.526	1.2114	1.2188	1.5733	1.2345	1.1592	1.1884	1.2505	0.6085	0.4116	0.522	1.1344	0.8103	0.4811	2.007	1.6732	1.8634	0.629	0.4874	0.6385	1.1344	1.6439
glucuronate	Carbohydrate	Aminosugar Metabolism	15443	LC/MS Polar	100000257	3233.3	193.035	207300-70-7	444791	C00191	HMDB00127	0.729	0.7576	0.5208	3.0104	1.4695	1.7804	1.1688	0.9385	1.2048	0.6918	1.1603	1.1304	0.9127	0.8953	0.7189	1.0102	0.9905	0.6874	0.7391	0.9934	1.172	1.1244	0.7058	1.2147	0.5018	0.7227	0.3957	0.5201	0.3846	0.639	0.9837	1.1948	0.9279	0.7191	0.4953	0.8785	0.8262	1.2385
glutamate	Amino Acid	Glutamate Metabolism	57	LC/MS Pos Early	561	1500	148.06	56-86-0	611	C00025	HMDB00148	1.0296	1.0463	1.1335	0.9081	0.877	1.0197	1.0204	1.0413	1.2353	0.9943	0.7562	1.0441	1.0049	1.1907	1.4944	0.6789	0.6022	0.8226	0.9544	0.8422	0.9959	0.9091	0.8297	1.2964	1.4047	1.3179	1.4104	1.1971	1.592	1.9505	1.2495	0.7801	1.4238	1.078	0.6929	1.1724	1.4118	1.0493
glutamate, gamma-methyl ester	Amino Acid	Glutamate Metabolism	33487	LC/MS Pos Early	100001103	2170	162.076	1499-55-4	68662			1.0845	1.4522	2.201	1.2046	0.9209	1.2823	1.4773	1.3553	1.2349	0.544	0.6014	1.2341	0.8827	1.0372	1.2939	1.6685	0.5639	1.1407	0.8539	0.3497	1.3037	1.3066	0.6548	0.7228	0.942	0.5692	0.7666	0.3497	0.9906	0.9615	1.1005	0.644	1.1732	0.3497	0.3497	0.7874	2.3978	0.777
glutamine	Amino Acid	Glutamate Metabolism	53	LC/MS Pos Early	563	1291	147.076	56-85-9	5961	C00064	HMDB00641	1.243	1.0705	0.9863	0.7992	0.8491	0.93	1.1441	1.2216	1.3153	1.1275	1.1297	1.3029	0.8	0.9957	1.08	0.8605	0.9404	0.9134	1.1777	1.0869	1.3263	1.1593	1.0699	0.9599	1.3052	1.2506	1.2714	1.1563	1.3202	1.3177	1.3001	1.0749	1.2725	0.935	0.738	0.9752	0.9079	0.7323
glutaminylleucine	Peptide	Dipeptide	42994	LC/MS Pos Early	100003160	3009	260.16					1.1656	3.5382	4.4947	1.0761	1.8547	1.2751	2.7964	1.8187	2.6753	2.5044	3.0686	2.9313	3.1089	4.9336	4.3675	2.8103	1.4961	2.2628	1.786	1.6643	2.527	2.9137	3.3086	3.5348	4.4541	3.2833	2.9206	2.2912	2.6803	6.2939	1.4619	2.2038	2.9073	3.3614	1.7415	3.2469	1.1148	1.311
glutarate (pentanedioate)	Amino Acid	Lysine Metabolism	396	LC/MS Polar	339	2900	131.035	110-94-1	743	C00489	HMDB00661	0.7493	0.6672	1.0606	1.4003	0.876	1.7574	1.0416	1.0093	1.2131	0.7368	1.9262	0.7689	1.4169	0.7583	0.8271	1.201	0.9736	0.875	1.0418	1.5153	0.9858	0.7581	0.9315	0.9095	1.5138	2.1154	1.0829	1.0429	1.2909	0.8891	1.1886	0.6719	0.7763	0.5555	1.0047	0.9882	1.9633	1.2741
glycerate	Carbohydrate	Glycolysis, Gluconeogenesis, and Pyruvate Metabolism	1572	LC/MS Polar	1052	2070.4	105.019	600-19-1	752	C00258	HMDB00139	1.4749	0.8772	0.8312	0.9866	0.8316	1.0481	0.7239	0.694	0.648	1.3059	1.3383	1.2965	1.2193	0.8539	1.0909	0.8809	0.7709	0.6314	1.2884	1.1498	0.8687	1.1205	0.8891	0.9841	2.1508	1.8604	1.6611	0.9732	1.2846	0.7213	1.1633	1.1194	1.1457	0.9278	1.3181	1.137	2.2317	2.4198
glycerol	Lipid	Glycerolipid Metabolism	15122	LC/MS Neg	1254	758	91.0401	56-81-5	753	C00116	HMDB00131	0.8271	0.8231	0.8844	0.5552	0.5455	0.5691	0.7337	0.6818	0.7013	0.5923	0.5618	0.674	0.897	0.5656	0.6345	0.6366	0.5733	0.6668	0.7383	0.6673	0.5823	0.7279	0.5102	0.742	0.9465	0.6428	0.7255	0.9705	0.7413	0.6696	0.6569	0.8232	0.765	0.7229	0.8054	0.726	0.6083	0.715
glycerol 2-phosphate	Xenobiotics	Chemical	27728	LC/MS Polar	100001029	3681.7	171.006	819-83-0	2526	C02979	HMDB02520	0.5914	0.5914	0.5914	0.5914	0.5914	0.5914	0.5914	0.5914	0.5914	0.5914	0.5914	0.5914	0.5914	0.5914	0.5914	0.5914	0.5914	0.5914	0.5914	0.5914	0.5914	0.5914	0.5914	0.5914	0.5914	0.5914	0.5914	0.5914	0.5914	0.5914	0.5914	0.5914	0.5914	0.5914	0.5914	0.5914	0.5914	0.5914
glycerol 3-phosphate	Lipid	Glycerolipid Metabolism	43847	LC/MS Polar	100000258	3938.7	171.006	29849-82-9	754	C00093	HMDB00126	0.8547	0.5602	0.5535	0.3729	0.2417	0.2749	0.372	0.4559	0.6381	0.3018	0.4235	0.6836	0.4004	0.3644	0.4139	0.3946	0.368	0.2553	0.3921	0.3962	0.3628	0.3528	0.4098	0.5566	0.6111	0.4569	0.4961	0.7534	0.498	0.3724	0.6332	0.5583	0.8412	0.3111	0.2418	0.2772	0.2039	0.5641
glycerophosphoethanolamine	Lipid	Phospholipid Metabolism	37455	LC/MS Polar	100001620	3075	214.049	33049-08-0	123874	C01233	HMDB00114	0.9357	0.7204	0.8056	0.7006	0.6702	0.7378	0.4835	0.5731	0.5838	0.4656	0.4163	0.5513	0.5441	0.6869	0.6539	0.6155	0.8827	0.6757	0.6692	0.8354	0.7138	0.5966	0.554	0.7594	0.7606	0.8421	0.8306	0.69	0.5854	0.6384	0.7867	0.7096	0.726	0.636	0.7474	0.7036	0.61	0.717
glycerophosphoglycerol	Lipid	Glycerolipid Metabolism	48857	LC/MS Polar	100001619	2430	245.043		439964	C03274		0.8455	0.5115	0.5833	0.8642	0.7418	0.728	0.4073	0.4793	0.4891	0.3207	0.2701	0.4801	0.3515	0.5856	0.5207	0.3639	0.5787	0.3744	0.4057	0.5443	0.4522	0.4439	0.3939	0.5949	0.3992	0.4836	0.4798	0.5849	0.3431	0.5203	0.8574	0.4393	0.5345	0.5019	0.4919	0.4431	0.5431	0.4532
glycerophosphoinositol*	Lipid	Phospholipid Metabolism	47155	LC/MS Polar	100001621	3850	333.059	16824-65-0				0.5852	0.3504	0.3894	0.5635	0.4248	0.3207	0.2062	0.273	0.2356	0.2136	0.1932	0.2531	0.2694	0.3333	0.3362	0.3103	0.4526	0.2079	0.1681	0.2851	0.1672	0.2686	0.2112	0.3682	0.522	0.47	0.3444	0.4464	0.1859	0.1996	0.3752	0.2204	0.2241	0.2703	0.2953	0.2467	0.3393	0.2474
glycerophosphorylcholine (GPC)	Lipid	Phospholipid Metabolism	15990	LC/MS Pos Early	100000269	672	258.11	28319-77-9	71920	C00670	HMDB00086	0.8851	0.6954	0.8028	0.8216	0.7133	0.688	0.4919	0.5755	0.5574	0.3461	0.3104	0.4979	0.5722	0.7228	0.682	0.6316	0.8303	0.6811	0.4655	0.6337	0.5786	0.5535	0.4901	0.7811	0.7307	0.775	0.7477	0.7183	0.5147	0.587	0.7777	0.5102	0.6418	0.6363	0.6039	0.5848	0.6705	0.5642
glycine	Amino Acid	Glycine, Serine and Threonine Metabolism	58	LC/MS Pos Early	340	1375	76.0393	56-40-6	750	C00037	HMDB00123	1.5597	1.2561	1.0547	1.0193	1.0953	1.0949	1.0413	0.6651	1.095	1.3244	1.1443	1.4406	1.1946	1.5679	1.7101	0.742	1.1667	1.1113	1.1052	0.7649	0.9539	0.9485	0.3315	1.3375	0.9518	0.7277	1.3094	1.0365	1.7323	1.7493	1.2987	1.0127	1.207	1.3313	0.8076	1.3927	1.1373	1.0945
glycosyl-N-palmitoyl-sphingosine	Lipid	Sphingolipid Metabolism	53013	LC/MS Pos Late	100009272	2623	700.572					1.2312	1.0397	1.222	1.0192	1.2106	1.2497	0.8595	0.9638	0.7524	1.002	0.8731	0.8081	1.0086	1.1511	1.3274	0.7522	0.9993	0.8604	1.1451	1.2478	0.9675	0.9062	0.8455	0.9754	0.8347	1.0007	0.9099	1.0419	1.0771	1.053	1.2503	0.8327	0.997	0.7776	0.9057	0.7674	0.9159	0.9357
glycosyl-N-stearoyl-sphingosine	Lipid	Sphingolipid Metabolism	52234	LC/MS Pos Late	100001882	3053	728.604					1.1645	1.0963	0.9583	1.0154	1.3719	1.3983	0.8054	0.9904	0.877	1.0482	0.8603	0.7418	0.862	1.1363	1.0855	0.7322	0.9926	0.9671	1.2776	1.1646	0.9962	0.8559	0.8533	0.9598	0.8358	0.9694	0.723	0.9708	1.1134	0.76	0.9993	0.7494	0.6172	0.7237	0.7431	0.6301	1.0689	1.0478
glycylisoleucine	Peptide	Dipeptide	36659	LC/MS Pos Early	100001790	3002	189.123	19461-38-2	88079		HMDB28844	2.2223	1.9938	2.143	0.8209	1.1897	1.0702	1.7486	1.3122	1.7985	2.6514	1.8207	2.1667	2.3237	2.9542	3.5044	1.565	1.5458	1.4041	1.9441	1.6834	1.5287	2.1291	2.1324	2.4118	3.6604	2.686	2.7498	1.4511	2.803	4.1754	2.3908	1.6912	2.7743	2.3979	1.9485	2.3103	1.2636	1.0436
glycylleucine	Peptide	Dipeptide	34398	LC/MS Pos Early	100001258	3059	189.123	869-19-2	92843	C02155	HMDB00759	2.1972	2.063	2.3016	0.8574	1.138	1.1447	1.9734	1.6115	2.1664	2.1794	1.7457	2.0976	2.3247	3.1723	3.5764	1.4321	1.3493	1.2259	2.0724	1.8646	1.8632	2.3881	2.015	2.358	3.3184	2.5312	2.7409	2.7255	3.3906	4.5809	2.2506	1.6016	2.7309	2.1959	1.7233	1.9951	1.4491	1.266
glycylvaline	Peptide	Dipeptide	18357	LC/MS Pos Early	100000487	2734	175.108	1963-21-9	97417		HMDB28854	3.0644	2.4571	2.4738	0.7865	1.2271	1.0211	2.3927	1.8014	2.297	3.1415	2.3635	2.6274	2.9035	3.6984	4.7649	1.6965	1.7887	1.9805	2.5783	1.8861	1.8718	2.3211	2.0417	2.5995	3.9819	3.3819	3.7411	3.1425	4.5212	5.9512	3.5065	1.79	3.1648	2.9283	2.2261	2.7251	1.9328	1.3896
guanine	Nucleotide	Purine Metabolism, Guanine containing	32352	LC/MS Pos Early	172	2032	152.057	73-40-5	764	C00242	HMDB00132	1.6525	1.8275	0.9741	1.5361	1.8973	1.9212	2.0013	1.6501	2.1895	1.2646	1.2152	1.7589	0.9625	2.1245	2.1321	0.7345	0.2634	1.2636	1.1384	0.7095	1.5901	1.1402	0.6417	2.1957	0.6861	0.7087	1.3216	1.0771	1.8425	2.2257	1.2937	0.7815	1.2549	1.5563	0.5779	1.1127	2.3256	1.5133
guanosine	Nucleotide	Purine Metabolism, Guanine containing	1573	LC/MS Neg	1099	1662	282.084	118-00-3	6802	C00387	HMDB00133	1.252	1.421	0.5129	1.0082	1.5072	1.8163	1.3979	1.4762	1.325	1.3204	1.6633	0.9775	1.6573	1.5715	1.2698	1.3804	1.4252	0.5624	1.4282	2.1095	1.3826	1.4047	1.4418	1.4783	1.1674	0.9699	0.4342	1.291	1.1022	0.9115	1.6595	2.3851	0.9927	1.2613	1.5691	1.1105	0.9734	2.2357
guanosine 3'-monophosphate (3'-GMP)	Nucleotide	Purine Metabolism, Guanine containing	39786	LC/MS Neg	100002704	773.9	362.051	117-68-0	3522			2.0108	1.6953	1.6307	1.0185	1.3644	1.462	0.84	1.0284	1.2074	1.574	1.5558	1.2803	1.9141	1.4886	2.0061	2.0323	1.8774	1.6075	1.3839	1.3906	1.1078	1.6222	1.3861	1.4702	2.1478	1.6306	1.287	1.6703	1.533	1.8835	1.8777	2.0158	1.5539	0.9856	1.6873	1.3371	0.9348	1.4462
guanosine-2',3'-cyclic monophosphate	Nucleotide	Purine Metabolism, Guanine containing	37139	LC/MS Neg	74	1480	344.04	15718-49-7	92823	C06194	HMDB11629	1.9507	2.0569	1.3143	1.1348	1.6546	1.733	1.3118	1.3728	1.4864	1.341	1.9106	1.446	1.9041	1.4914	1.4196	2.2061	2.211	1.4897	1.9797	2.2285	1.8255	1.8662	1.8107	1.8446	1.9072	1.4346	1.0911	1.4883	1.0832	1.3188	1.8736	2.611	1.5715	1.1028	1.5761	1.5219	1.4716	2.4448
gulonic acid*	Cofactors and Vitamins	Ascorbate and Aldarate Metabolism	46957	LC/MS Polar	100001586	2750	195.051	20246-53-1	9794176		HMDB03290	1.5357	1.1286	1.2844	1.9204	1.0008	1.0259	1.4567	1.0157	0.8753	0.7966	1.0349	0.8314	1.9402	0.9611	1.114	1.7558	0.9617	1.0148	1.2517	1.2812	0.5905	0.9731	1.2222	1.1961	1.0473	1.1892	1.1179	0.9217	0.7571	1.0714	0.9717	1.0268	1.417	0.6206	0.8412	1.1719	1.5753	1.536
heme	Cofactors and Vitamins	Hemoglobin and Porphyrin Metabolism	41754	LC/MS Pos Late	100001386	1124	616.176	14875-96-8	26945	C00032	HMDB03178	1.0067	0.8739	0.3967	1.2897	0.5743	1.0597	1.1933	1.3095	1.3031	4.246	1.816	1.7803	0.6499	0.9933	1.2037	3.4251	2.0319	2.1488	3.0392	1.2735	0.6499	3.1784	2.1704	1.205	1.6517	1.7762	2.8204	4.1595	1.7212	1.3108	0.8829	1.2801	1.8433	1.5227	1.8494	0.8525	0.7195	1.483
hexanoylglycine	Lipid	Fatty Acid Metabolism(Acyl Glycine)	35436	LC/MS Neg	100001527	2900	172.098	24003-67-6	99463		HMDB00701	1.3306	0.4399	0.9919	0.4399	0.4399	0.4399	0.4399	0.4399	0.4399	0.4399	0.86	0.6988	0.4399	0.4399	0.591	0.7312	0.994	1	0.6229	1.0139	0.5276	1.0097	0.8898	0.6416	1.2605	1.0179	1.0465	1.1085	0.4399	0.855	0.4399	0.4399	0.5565	0.8852	0.9712	1.1731	1.286	1.3216
hippurate	Xenobiotics	Benzoate Metabolism	15753	LC/MS Neg	100000014	2106.9	178.051	495-69-2	464	C01586	HMDB00714	0.3366	0.3366	0.3366	1.6623	1.2256	0.3366	1.4283	0.7904	0.3366	1.4225	2.0876	0.8165	1.9644	0.878	0.3366	0.9309	0.3366	0.3366	0.93	1.3158	0.3366	0.6618	0.3366	0.3366	0.8997	0.3366	0.3366	0.8492	0.3366	0.3366	0.3366	0.8085	0.3366	0.3366	0.3366	0.3366	0.5209	0.9613
histamine	Amino Acid	Histidine Metabolism	1574	LC/MS Pos Early	354	3035	112.087	51-45-6	774	C00388	HMDB00870	0.9093	0.9408	1.1139	0.6977	1.0236	0.998	0.5224	0.5556	0.6137	0.9566	0.7564	1.1824	0.563	0.74	0.7105	0.9108	1.0306	1.0226	0.8716	0.868	0.9819	0.8301	0.7907	0.8281	0.6353	0.7171	0.833	1.0959	1.3796	1.1208	0.7096	0.6563	0.7757	1.0644	0.9107	0.9034	0.8458	0.9002
histidine	Amino Acid	Histidine Metabolism	59	LC/MS Pos Early	355	2707	156.077	5934-29-2	6274	C00135	HMDB00177	1.3405	1.1388	1.1491	1.0962	1.0365	1.0307	1.4795	1.3678	1.3836	0.6874	0.6581	0.8907	0.8108	1.0738	0.9912	0.8468	0.8258	0.8142	0.9408	0.9881	1.1099	1.1886	0.9997	1.1725	0.8376	1.0297	1.097	1.0951	1.2819	1.5683	1.1632	0.9776	1.4941	1.296	1.1702	1.3891	0.82	0.7783
homoserine lactone	Amino Acid	Glycine, Serine and Threonine Metabolism	15696	LC/MS Pos Early	100000262	1980	102.055	2185-02-06	445963	C02926		0.8706	0.2079	0.2079	0.7358	0.58	0.503	0.2079	0.2079	0.4231	0.2332	0.2554	0.4745	0.2079	0.5653	0.838	0.2079	0.2079	0.2079	0.2079	0.2079	0.6858	0.2079	1.1792	0.2079	1.1015	0.2079	0.7013	0.2079	0.2079	0.6113	0.2079	0.2928	0.2079	0.7906	0.2079	0.6539	0.9476	0.4772
hypoxanthine	Nucleotide	Purine Metabolism, (Hypo)Xanthine/Inosine containing	3127	LC/MS Neg	171	1291.2	135.031	68-94-0	790	C00262	HMDB00157	1.2036	0.8193	1.4477	0.707	0.2798	0.1829	0.4406	0.4628	0.6455	0.2152	0.2739	0.3697	0.4806	0.1438	0.2588	0.397	0.3383	0.7351	0.5496	0.4552	0.6073	0.9351	1.5031	0.9626	2.0093	2.9793	3.7552	1.4332	2.4906	2.8636	0.3147	0.4916	1.9544	0.4748	0.7659	2.2362	2.1825	1.42
inosine	Nucleotide	Purine Metabolism, (Hypo)Xanthine/Inosine containing	1123	LC/MS Neg	361	1602.1	267.073	58-63-9	6021	C00294	HMDB00195	1.0039	0.8996	0.3138	0.9812	1.0221	1.1394	1.004	1.0135	0.8141	0.9906	1.1966	0.7375	0.9958	0.8988	0.6894	1.0074	1.1453	0.405	1.0357	1.4047	0.8796	1.0504	1.1427	0.8849	0.8551	0.7698	0.3336	0.9685	0.8052	0.5864	1.1274	1.6066	0.6238	1.0159	1.3476	0.9689	0.8223	1.4424
inositol 1-phosphate (I1P)	Lipid	Inositol Metabolism	43849	LC/MS Polar	370	4785	259.022	573-35-3;106032-59-1	440194	C04006	HMDB00213	2.2787	1.0262	0.9142	0.7949	0.9191	1.3402	0.8618	0.9763	1.1527	1.583	0.9921	0.88	1.0718	1.0588	1.896	0.8654	1.1097	0.8228	1.5614	1.2352	1.0006	0.9378	1.1641	1.0937	1.3067	1.2298	1.3104	1.965	1.7491	1.4432	1.3437	0.7099	0.9908	0.8019	0.7693	1.4956	0.9905	1.0548
Isobar: fructose 1,6-diphosphate, glucose 1,6-diphosphate, myo-inositol 1,4 or 1,3-diphosphate	Carbohydrate	Glycolysis, Gluconeogenesis, and Pyruvate Metabolism	46896	LC/MS Neg	100002180	551	338.989					1.6616	0.9438	0.1884	2.6192	2.2234	2.1326	1.0824	1.3291	1.2143	0.2666	0.1884	0.1884	0.1884	0.7221	0.1884	1.3074	0.973	1.3998	1.9307	0.1884	0.6581	0.4418	0.1884	1	0.945	1.0704	1.1945	4.0947	4.0524	1.598	4.6558	0.1884	2.7119	0.5909	0.4118	0.1884	1.0279	0.1884
isobutyrylcarnitine	Amino Acid	Leucine, Isoleucine and Valine Metabolism	33441	LC/MS Pos Early	100001055	2810	232.154	25518-49-4	168379		HMDB00736	1.0129	1.7915	1.0313	3.4671	4.2732	4.8699	1.1405	0.5354	0.3825	0.6923	0.847	0.9222	0.1212	1.3606	1.5618	0.3936	0.3523	0.4772	0.4024	0.1212	0.1212	1.0144	1.616	1.4273	0.1212	0.3248	0.6189	0.4518	0.1212	0.1212	0.7446	0.6143	1.2845	0.6084	0.1212	0.8141	0.7022	0.5899
isoleucine	Amino Acid	Leucine, Isoleucine and Valine Metabolism	1125	LC/MS Pos Early	376	2800	132.102	73-32-5	6306	C00407	HMDB00172	2.4079	1.8645	2.1352	1.0069	1.2085	1.2968	1.7973	1.706	1.8482	1.8565	1.302	1.573	1.3323	2.3556	2.9188	1.4744	1.5868	1.5194	2.0626	1.2655	1.7378	1.8912	1.7419	2.1353	2.7555	2.4719	2.4931	2.3258	2.9781	3.7673	2.4007	1.5077	2.2366	1.9919	1.0402	2.0199	1.6121	1.3861
isoleucylglycine	Peptide	Dipeptide	40008	LC/MS Pos Early	100003169	2719	189.123	868-28-0	342532			1.5913	2.4881	2.9517	1.069	1.6043	1.3642	1.8636	1.3254	2.2951	1.519	2.3657	2.4036	1.9803	3.1698	3.075	1.9595	1.6509	1.9777	1.5071	1.575	1.9129	2.2451	2.2339	2.8395	2.141	2.3131	2.2604	1.7976	2.0058	3.8233	1.6925	1.7807	2.4334	2.4824	1.5914	2.489	1.1781	1.351
isomaltose	Carbohydrate	Glycogen Metabolism	39777	LC/MS Polar	100002764	3950	387.114	499-40-1	439193	C00252	HMDB02923	2.9409	2.036	1.6872	1.513	1.1012	1.6851	1.2278	1.6212	0.9351	0.9943	1.1745	1.0065	1.3822	1.0772	0.7972	1.9887	2.3225	1.7993	1.6031	2.1798	1.4226	1.8252	2.1137	1.9063	2.8269	3.188	2.6569	2.1045	2.0947	2.3102	1.922	2.4931	1.8658	2.3338	3.0525	2.0386	1.0183	1.3578
isoxanthopterin	Cofactors and Vitamins	Pterin Metabolism	27732	LC/MS Polar	100000749	2764.2	178.037	529-69-1	10729	C03975	HMDB00704	0.5579	0.5053	0.5493	0.4794	0.376	0.2914	0.2051	0.2607	0.2978	0.3133	0.3722	0.3928	0.5032	0.5758	0.6897	0.3403	0.4484	0.3778	0.9526	1.3287	1.0995	0.3209	0.2991	0.3046	0.3695	0.3857	0.2633	0.3341	0.2647	0.2388	0.1393	0.1186	0.1448	0.3494	0.2964	0.4007	0.0432	0.0287
kojibiose	Xenobiotics	Food Component/Plant	21040	LC/MS Polar	100000928	3500	387.114	2140-29-6	164939	C19632	HMDB11742	3.1182	2.287	2.5156	1.7178	1.2598	1.201	1.5054	1.5414	1.278	0.9069	1.0941	1.1155	0.7618	0.9981	0.5521	1.9289	1.886	2.5068	1.1357	2.0335	0.9654	1.8528	2.6343	2.5745	1.9474	2.9358	2.0529	1.6269	1.898	1.7921	2.1154	2.303	1.3555	2.4322	3.6744	2.4407	0.9239	1.6488
kynurenate	Amino Acid	Tryptophan Metabolism	1417	LC/MS Neg	98	2224	188.035	492-27-3	3845	C01717	HMDB00715	1.6353	1.6361	1.953	1.2398	1.4352	1.5208	1.3092	1.2876	1.4045	1.3266	1.3944	1.4664	0.6714	0.7352	0.5926	1.3514	1.311	1.2336	1.8195	2.3243	2.2275	1.4876	1.5101	1.6543	0.9405	1.0201	1.0837	0.0449	0.0563	0.0575	1.3163	1.8868	1.7451	2.3657	2.4031	2.3705	2.3361	2.9758
kynurenine	Amino Acid	Tryptophan Metabolism	15140	LC/MS Pos Early	100000265	2739	209.092	2922-83-0	161166	C00328	HMDB00684	1.4665	1.5981	1.3406	1.982	2.2891	2.3647	2.4138	2.4868	1.9336	0.9828	0.8869	1.2945	1.0719	1.8576	1.4287	0.8566	0.7859	1.0964	1.5767	1.4889	2.2185	1.2312	1.1204	1.8256	0.8283	1.0907	1.2882	0.3774	0.6013	0.9294	2.2128	1.7289	2.1266	0.9479	0.698	1.1552	1.3586	1.3085
lactate	Carbohydrate	Glycolysis, Gluconeogenesis, and Pyruvate Metabolism	527	LC/MS Polar	482	1468.8	89.0244	79-33-4	612	C00186	HMDB00190	1.245	1.2424	1.2328	0.7035	0.4592	0.4726	0.8715	0.6894	0.7505	0.642	0.5491	0.9143	0.7612	0.7826	0.9846	1.1399	0.8944	1.3157	1.0942	0.8744	0.8305	0.9378	1.0402	1.1419	1.1963	1.3222	1.5542	1.0229	1.4019	1.3951	1.127	0.9734	1.4928	1.0245	1.1399	1.4645	0.824	1.6769
lactosyl-N-palmitoyl-sphingosine	Lipid	Sphingolipid Metabolism	53010	LC/MS Pos Late	100009030	2527	862.625	4201-62-1				1.4893	1.296	0.7446	0.92	1.183	0.4283	0.9365	1.2633	0.4283	0.7188	0.4283	0.4283	1.0775	1.3286	1.023	0.9055	0.4283	0.9506	1.2547	1.4097	1.0221	0.9879	1.0767	0.4283	0.8388	0.4283	0.5562	0.8381	0.8007	0.6956	1.1127	1.2912	1.2585	0.8926	0.4283	0.4283	0.6898	0.8737
lanthionine	Xenobiotics	Chemical	42002	LC/MS Pos Early	100003892	1730	209.059	3183-08-02	6994972;98504			2.515	2.669	1.8521	2.1723	1.7545	3.328	3.1433	1.3145	4.0625	0.1128	0.7072	1.6644	0.1128	0.8804	1.7939	0.1128	0.1128	1.6278	2.4171	2.153	0.1128	0.8671	0.1128	4.1582	1.0441	0.1128	0.1128	0.9325	3.2366	3.8891	4.771	3.0366	1.9202	1.2865	0.6011	1.0233	3.2132	5.9209
laurate (12:0)	Lipid	Medium Chain Fatty Acid	1645	LC/MS Neg	181	5300	199.17	143-07-7	3893	C02679	HMDB00638	0.9568	1.0305	0.9961	0.5578	0.5789	0.7835	1.1035	0.8985	1.27	1.0564	0.9172	0.7964	1.3854	1.0992	1.2729	0.8429	0.8672	0.9049	0.9711	0.9931	0.7706	0.7975	0.8347	1.1056	1.4051	1.1273	1.0649	1.0416	0.9944	1.3851	0.807	0.8107	0.8617	0.6772	0.9035	0.9565	0.6456	0.8701
leucine	Amino Acid	Leucine, Isoleucine and Valine Metabolism	60	LC/MS Pos Early	397	2864	132.102	61-90-5	6106	C00123	HMDB00687	2.2108	1.8804	1.8216	0.8597	1.0654	0.9832	1.6474	1.5086	1.5993	1.8049	1.1458	1.3823	2.1484	2.2215	2.498	1.492	1.3839	1.4411	2.0606	1.5163	1.5445	1.7796	1.4864	1.8673	2.6871	2.1044	2.1411	2.3927	2.8431	3.1486	2.2476	1.3408	2.0643	1.8659	1.5387	1.7767	1.5181	1.2712
leucylalanine	Peptide	Dipeptide	40010	LC/MS Pos Early	100003179	2801	203.139	7298-84-2	259321			0.1563	2.0743	4.2319	0.5399	1.4523	1.3158	1	0.1563	2.0962	0.4652	3.4083	2.5523	0.1563	3.1045	2.8252	0.681	0.7799	1.9992	0.1563	0.4739	1.6369	0.9321	3.0433	4.0689	0.1563	1.643	1.3612	0.1563	0.1563	3.2864	0.3239	1.3787	1.327	2.1622	0.1563	2.7664	0.1563	0.737
leucylglutamine*	Peptide	Dipeptide	48189	LC/MS Pos Early	100003183	2620	260.161		4305457			0.721	3.5776	4.374	0.9077	1.7194	1.3626	2.2166	1.3106	3.0573	4.2613	7.0915	6.7558	0.1087	4.7644	3.7049	1.3887	0.7314	2.9953	0.8119	0.4134	2.0415	1.1787	2.5484	5.068	0.1087	1.6739	1.6668	0.1087	1.6617	5.778	1.2205	1.1672	1.9612	3.7767	0.1087	2.4382	0.7432	0.8375
leucylglycine	Peptide	Dipeptide	40045	LC/MS Pos Early	100003185	2778	189.123	686-50-0	79070			1.4431	4.6619	4.8528	1.5785	1.9705	1.4353	1.9552	1.1306	1.7254	0.9653	2.1669	2.235	1.3625	4.9216	2.5891	2.2041	1.1319	2.1216	1.7637	0.9637	2.7163	2.0951	2.333	3.3502	1.2088	1.4887	1.5579	0.8411	1.7735	3.1545	1.4603	1.7306	2.0481	4.7393	0.5468	2.5382	1.4032	1.3048
linoleate (18:2n6)	Lipid	Polyunsaturated Fatty Acid (n3 and n6)	1105	LC/MS Neg	180	5535	279.233	60-33-3	5280450	C01595	HMDB00673	1.1312	0.9142	0.5568	1.0958	1.1687	1.3679	0.9252	1.0312	1.0495	0.9272	0.8789	0.5814	0.9509	0.8968	0.4076	1.0917	1.1914	1.0395	0.9013	1.2501	0.8945	1.0519	1.1546	1.067	1.0989	0.9491	0.8013	0.9028	0.8559	0.6093	1.0516	0.9986	0.9924	0.9952	0.9823	0.6222	1.0301	1.2116
linolenate [alpha or gamma; (18:3n3 or 6)]	Lipid	Polyunsaturated Fatty Acid (n3 and n6)	34035	LC/MS Neg	100001337	5450	277.217		5280934	C06426	HMDB03073	1.0909	1.0106	0.5641	0.9406	0.9347	1.0628	0.6622	0.7475	0.6855	0.7289	0.8228	0.5721	0.9246	0.8718	0.4465	1.1378	1.2902	0.9323	0.8887	1.2759	0.8841	0.8739	0.9744	0.8188	1.0324	0.9974	0.7233	0.8601	0.7763	0.5965	0.8595	1.0407	0.8977	0.9587	0.9438	0.7032	0.9133	1.3259
linoleoylcarnitine*	Lipid	Fatty Acid Metabolism(Acyl Carnitine)	46223	LC/MS Pos Late	100003151	1430	424.342	36816-10-1	6450015		HMDB06469	0.3676	0.6176	0.7077	2.4717	4.9452	7.1363	1.0941	0.8195	0.7646	1.2048	1.2196	1.9468	2.7835	2.9003	1.6218	0.8768	1.0416	1.3898	1.5486	1.3091	1.9088	1.9289	1.8658	4.0185	0.5316	0.3526	0.6967	0.5439	0.3374	0.6744	2.0031	1.0865	1.9641	0.5978	0.4113	1.2793	2.0471	1.3861
lysine	Amino Acid	Lysine Metabolism	1301	LC/MS Pos Early	407	2850	147.113	56-87-1	5962	C00047	HMDB00182	2.6316	1.9029	2.0547	1.2696	1.3612	1.3345	1.9962	1.804	1.8556	2.2215	1.5325	1.7932	2.1051	2.6132	2.8874	1.822	1.6498	1.5955	2.4594	1.6296	1.9342	1.8479	1.3663	2.0601	2.7646	2.3539	2.3376	2.8428	3.6643	4.0421	2.5536	1.2724	2.1391	2.1407	1.6646	2.0455	1.8389	1.4141
lysylleucine	Peptide	Dipeptide	40020	LC/MS Pos Early	100003196	3370	260.197	7369-79-1	4682588			3.3863	4.5221	3.264	1.1074	1.2696	1.0206	2.8897	1.839	2.4312	2.3528	1.7742	1.6529	1.5985	4.2276	4.2057	1.4056	1.1502	2.0888	2.5216	1.3894	2.1152	2.228	1.7626	3.2993	3.1952	1.7541	2.7468	2.3561	4.2432	6.4905	2.9364	1.3595	2.535	3.773	1	2.5442	1.6753	1.4265
malate	Energy	TCA Cycle	1303	LC/MS Neg	409	615.6	133.014	6915-15-7	525	C00149	HMDB00156	0.974	1.1975	0.0531	1.5155	1.1321	0.9116	0.9728	0.8432	0.2408	1.7946	4.406	0.3433	1.2626	1.3815	0.324	0.9548	2.2274	0.0808	1.2184	3.0986	0.1792	1.4615	2.7275	0.5411	1.218	2.2214	0.0797	1.5081	1.1955	0.77	1.5134	3.789	0.0971	1.6845	5.4879	1.9379	0.8024	4.3653
malonate	Lipid	Fatty Acid Synthesis	15872	LC/MS Polar	818	3447	103.004	141-82-2;26522-22-85-0	867	C00383	HMDB00691	1.6008	1.01	1.6332	1.9689	1.0773	1.2602	1.3305	0.9555	1.0685	1.1278	1.733	0.6624	0.9422	0.7406	0.7591	1.3007	1.1043	1.0626	1.3191	1.5354	1.0615	1.5289	1.2065	1.0222	1.2503	1.648	0.9663	0.8503	0.7871	0.9566	0.964	1.4748	0.8568	1.0887	1.3279	0.9772	1.8171	1.5347
maltopentaose	Carbohydrate	Glycogen Metabolism	35163	LC/MS Neg	100001447	1080.9	827.267	34620-76-3	13489094	C06218	HMDB12254	1.2002	1.2019	0.7306	1.1856	0.3592	1.3446	0.7106	0.8268	0.5392	0.5321	0.6868	0.6491	1.184	1.0276	0.7049	1.765	1.5945	1.8744	1.0066	1.5609	1.2368	1.5406	1.2057	1.5197	2.0243	2.8323	2.8276	1.6065	1.8652	1.806	1.3801	0.8192	1.7608	2.063	2.7574	2.2175	1.1342	1.4249
maltose	Carbohydrate	Glycogen Metabolism	15586	LC/MS Polar	913	3329.4	387.114	6363-53-7	10991489	C00208	HMDB00163	1.7883	1.5391	1.2491	0.555	0.5091	0.6285	1.1324	1.296	0.8119	0.9652	1.1227	1.0162	0.7835	0.9839	0.846	1.5359	2.1635	1.8171	0.4842	0.791	0.7738	0.9945	1.1975	1.3585	0.5718	0.5302	0.4101	0.6512	0.6104	0.3646	1.1438	1.6716	0.8902	0.8222	1.1794	0.608	0.5725	0.7513
maltotetraose	Carbohydrate	Glycogen Metabolism	15910	LC/MS Neg	100000275	910	665.215	34612-38-9	446495	C02052	HMDB01296	1.284	1.0442	1.2108	0.9641	1.0051	0.6489	0.8438	0.8748	2.0657	0.9659	3.6128	2.7961	1.2685	0.8286	0.405	1.3295	1.4	1.2619	0.9569	0.6656	0.5264	1.1086	0.6914	0.7415	3.0654	1.9906	2.183	1.7465	2.0674	1.0919	0.9428	2.8563	0.6758	2.0765	1.3426	1.2172	0.98	0.5787
maltotriose	Carbohydrate	Glycogen Metabolism	44688	LC/MS Neg	100000276	812	503.162	1109-28-0	439586	C01835	HMDB01262	2.1159	1.3848	0.8865	1.2799	0.9601	1.0202	1.5604	1.2709	1.31	2.2922	2.851	2.3106	0.7144	0.9109	0.5729	2.9857	2.4305	1.7739	0.7662	0.9182	0.7317	1.2997	1.3335	1.6105	1.4132	1.0862	0.9559	1.407	1.1223	0.7867	1.309	1.9892	0.7194	0.071	1.746	1.0295	1.0029	0.7568
mannitol/sorbitol	Carbohydrate	Fructose, Mannose and Galactose Metabolism	46142	LC/MS Polar	100001740	2260	181.072		5780	C01507	HMDB00247	1.6593	0.9197	1.4722	1.5173	0.9761	0.8479	2.3954	1.439	0.9594	1.1372	1.4812	1.1431	1.3959	1.166	1.1619	1.5283	0.8776	1.0107	1.3327	1.3442	0.7174	1.2906	1.4238	1.2079	1.6249	1.579	1.2012	1.0314	0.9574	0.8417	0.8134	0.9346	1.3993	1.136	1.1586	1.1278	2.2555	2.3178
mannose	Carbohydrate	Fructose, Mannose and Galactose Metabolism	48153	LC/MS Polar	803	2200	225.062	3458-28-4	18950	C00159	HMDB00169	1.1557	1.03	1.0437	1.1132	0.9205	0.938	1.6381	1.2329	1.9503	1.3255	1.4494	0.8958	1.3302	1.0029	1.0597	1.2718	1.2888	1.159	1.2802	1.8882	1.2016	1.3556	1.7773	1.5932	1.5904	1.5372	1.3721	1.4263	0.942	1.1757	1.4316	1.9658	1.4721	0.9866	1.4684	0.8001	1.1958	1.8205
mannose-6-phosphate	Carbohydrate	Fructose, Mannose and Galactose Metabolism	1469	LC/MS Polar	294	4510	259.022	70442-25-0;104872-94-8	439198	C00275	HMDB01078	1.2832	1.1932	0.6823	0.7371	0.6039	0.8428	1.1828	0.7726	1.6919	1.7645	1.3668	0.8776	0.4905	0.7906	0.7987	1.2585	1.4568	0.9378	1.2843	1.5095	1.0455	1.1393	1.1971	1.158	0.5324	0.4513	0.527	1.2068	0.7714	0.4702	1.8442	1.6143	1.3787	0.6017	0.6003	0.6517	0.9789	1.4478
margarate (17:0)	Lipid	Long Chain Fatty Acid	1121	LC/MS Neg	891	5731	269.249	506-12-7	10465		HMDB02259	1.0966	1.3078	0.8277	0.9846	1.2404	1.6279	1.1931	1.3602	1.5721	1.0579	0.8934	0.5534	1.1609	1.392	0.5526	1.0562	1.1204	1.3344	0.9248	0.9973	0.8583	1.0792	1.2345	1.08	0.961	1.2186	1.1777	0.8733	1.3086	0.6291	0.9171	0.9057	1.4244	0.9758	0.7404	0.6099	1.1427	1.1427
mesaconate (methylfumarate)	Energy	TCA Cycle	18493	LC/MS Polar	100000446	3000	129.019	498-24-8	638129	C01732	HMDB00749	1.738	0.7166	0.1559	1.2107	2.7193	4.0363	1.1008	1.3195	1.0998	1.562	1.2353	1.8037	0.7885	2.0576	1.7904	0.3145	1.5051	0.9377	2.4083	2.5239	3.0384	1.21	0.9469	1.6052	0.3287	0.1559	0.4609	0.3129	1.1062	1.1363	1.531	1.3848	0.4569	1.2029	1.6496	0.6463	0.4553	0.5579
methionine	Amino Acid	Methionine, Cysteine, SAM and Taurine Metabolism	1302	LC/MS Pos Early	415	2526	150.058	63-68-3	6137	C00073	HMDB00696	2.5639	2.0271	2.0827	0.8784	1.1901	1.1209	1.8022	1.6407	1.6687	1.8889	1.3304	1.6034	2.0931	2.3971	2.805	1.6011	1.505	1.4978	2.0297	1.5499	1.5972	1.986	1.6087	2.1069	3.0503	2.2996	2.3531	2.7034	3.2604	3.7734	2.4401	1.4478	2.1035	1.9102	1.6049	1.8741	1.4721	1.2176
methionine sulfone	Amino Acid	Methionine, Cysteine, SAM and Taurine Metabolism	44878	LC/MS Polar	100004635	1880	180.034	820-10-0	69961			0.4718	1.0503	5.1543	2.8488	0.8757	0.5429	1.2323	1.1725	1.1495	0.224	0.1455	0.6887	0.552	1.5109	2.339	1.7332	0.2124	1.9564	0.0759	0.0759	0.2636	0.8104	0.7046	1.2294	1.2913	1.9555	1.7403	1.3894	1.8369	1.0039	0.6652	0.0759	1.7794	1.1818	0.0759	0.7818	4.1458	0.862
methionine sulfoxide	Amino Acid	Methionine, Cysteine, SAM and Taurine Metabolism	18374	LC/MS Pos Early	100000039	1272	166.053	3226-65-1	158980	C02989	HMDB02005	1.2693	0.8973	1.3912	1.4254	1.3056	1.5727	1.1368	1.139	1.2588	0.7064	0.6749	1.0562	1.3299	1.3506	1.4196	1.6056	1.9298	1.692	1.1511	1.4322	1.408	1.3407	1.4728	1.4851	0.8257	0.864	0.6957	1.1354	1.0369	0.7146	1.5338	1.533	1.1086	1.2841	1.1727	1.1641	1.5413	1.8801
methyl glucopyranoside (alpha + beta)	Xenobiotics	Food Component/Plant	46144	LC/MS Pos Early	100005864	832	212.113					1.8131	2.166	0.7115	1.2938	1.0311	1.4349	1.8868	1.3754	1.5957	0.7087	0.8678	0.969	0.4142	1.2753	1.3856	0.5359	0.9517	1.2593	1.492	0.9019	0.9829	0.7678	0.2369	1.2944	0.5548	0.8151	1.9144	0.4996	1.0621	1.6828	1.5685	0.8961	1.5938	1.2005	0.5771	0.9815	2.233	0.8582
methyl-4-hydroxybenzoate	Xenobiotics	Benzoate Metabolism	34386	LC/MS Neg	100001252	3671	151.04	99-76-3	7456	D01400	HMDB32572	0.7311	0.681	1.3337	2.3092	1.2649	0.7718	1.5882	1.47	0.9573	1.3982	2.6357	0.7129	2.4318	1.333	1.4878	2.1001	0.7874	0.9976	1.4137	2.0153	0.6976	1.7306	1.6806	1.3288	2.3781	1.4815	0.9149	1.2718	0.4661	1.0279	0.5376	0.8989	0.7647	1.1317	1.5099	1.1804	2.3003	2.3456
methylmalonate (MMA)	Lipid	Fatty Acid Metabolism (also BCAA Metabolism)	1496	LC/MS Polar	418	3078.4	117.019	516-05-2	487	C02170	HMDB00202	0.7451	0.8338	1.4244	3.5018	1.4111	1.1107	2.6497	1.1403	0.945	2.6402	4.9315	1.307	1.978	0.5682	0.8871	1.2355	0.753	0.7477	1.6298	1.7869	1.1026	1.4127	1.671	1.1067	1.1506	2.3663	1.5513	0.753	0.4001	0.7286	0.6147	1.1063	1.4559	0.5946	0.8866	0.9391	2.294	1.5687
methylphosphate	Nucleotide	Purine and Pyrimidine Metabolism	37070	LC/MS Polar	100001805	3760.1	110.985	7023-27-0	13130		HMDB61711	1.1245	0.7641	1.2854	0.8649	0.8304	1.0634	0.944	1.0187	0.9913	0.6759	0.5534	0.9475	1.0911	1.3407	1.4095	0.8036	0.6103	1.0271	0.991	0.7942	0.8893	1.0209	0.8607	1.321	1.3933	1.127	1.5065	0.9804	0.9324	0.8854	0.7745	0.5514	0.9501	1.0013	0.7654	1.0079	0.9436	0.7413
methylsuccinate	Amino Acid	Leucine, Isoleucine and Valine Metabolism	15745	LC/MS Polar	2051	2800	131.035	498-21-5	10349		HMDB01844	1.0232	1.0029	1.1883	1.8736	1.5976	1.1535	1.0987	0.9678	0.8161	1.185	1.4173	0.8561	1.1397	1.0723	1.0126	1.338	1.4024	1.1677	1.1675	1.243	0.915	1.3662	1.547	1.3717	1.1256	2.536	1.4787	0.7824	0.7964	1.1277	0.7191	0.8194	1.0935	0.7664	0.7104	1.8691	1.5401	1.7313
mevalonate	Lipid	Mevalonate Metabolism	39583	LC/MS Polar	30	1462	147.066	96949-03-0	439230	C02104	HMDB00227	0.1864	0.134	0.1027	0.3103	0.5502	0.1267	0.1437	0.2247	0.157	0.1262	0.0933	0.08	0.1279	0.1369	0.0505	0.1274	0.0621	0.0517	0.1192	0.1677	0.0857	0.1359	0.0635	0.0921	0.2585	0.2541	0.0942	0.2849	0.1825	0.0564	0.2768	0.1484	0.0834	0.1193	0.0659	0.0529	0.1874	0.0971
mevalonate 5-phosphate	Lipid	Mevalonate Metabolism	38627	LC/MS Neg	32	594	227.033	868553-49-5	476	C01107	HMDB01343	0.1619	0.1619	0.1619	0.1619	0.1619	0.1619	0.1619	0.1619	0.1619	0.1619	0.1619	0.1619	0.1619	0.1619	0.1619	0.1619	0.1619	0.1619	0.1619	0.1619	0.1619	0.1619	0.1619	0.1619	0.1619	0.1619	0.1619	0.1619	0.1619	0.1619	0.1619	0.1619	0.1619	0.1619	0.1619	0.1619	0.1619	0.1619
mevalonolactone	Lipid	Mevalonate Metabolism	48118	LC/MS Pos Early	100000772	1375	131.07	674-26-0	10428		HMDB06024	0.1255	0.0816	0.0578	0.1825	0.2899	0.066	0.1858	0.1482	0.1209	0.0961	0.0474	0.0873	0.0246	0.0828	0.0402	0.167	0.0795	0.0246	0.134	0.0753	0.0246	0.1107	0.0649	0.0725	0.0246	0.1527	0.0706	0.0246	0.1183	0.0608	0.17	0.116	0.042	0.0892	0.039	0.0576	0.1514	0.0674
myo-inositol	Lipid	Inositol Metabolism	1124	LC/MS Polar	363	3506.3	225.062	87-89-8	892	C00137	HMDB00211	0.6283	0.448	0.381	0.6147	0.4998	0.5545	0.5839	0.3793	0.542	0.4719	0.4819	0.4348	0.6953	0.5561	0.7733	0.5877	0.6579	0.496	0.6435	0.8707	0.5529	0.6421	0.6364	0.7516	0.6124	0.585	0.5556	0.3928	0.4307	0.4827	0.3701	0.9935	0.3578	0.4434	0.6264	0.669	0.6064	0.8072
myristate (14:0)	Lipid	Long Chain Fatty Acid	1365	LC/MS Neg	519	5440	227.202	544-63-8	11005	C06424	HMDB00806	1	1.0833	0.6495	0.6316	0.7563	1.0599	0.8445	0.9004	1.0604	0.8768	0.9206	0.6116	0.9331	0.7388	0.4443	0.8937	0.9776	0.9244	0.9317	1.1979	0.7884	0.9652	1.0058	0.8269	0.9296	0.8405	0.7329	0.772	0.7511	0.5832	0.6444	0.7629	0.6968	0.7958	0.8822	0.7006	0.6078	0.7988
myristoleate (14:1n5)	Lipid	Long Chain Fatty Acid	32418	LC/MS Neg	100001198	5346.9	225.186	544-64-9	5281119	C08322	HMDB02000	0.8735	0.8848	0.9	0.5887	0.7251	0.9376	1.0207	0.8671	1.1996	1.0122	1.0384	0.9537	1.1877	0.9795	1.5195	0.7985	0.7856	0.8502	0.8898	0.9451	0.7667	0.9998	1.0447	1.2024	1.2011	1.1637	1.0842	1.0287	0.9614	1.5177	0.6967	0.6491	0.7584	0.6991	0.7929	0.9377	0.5639	0.7871
myristoylcarnitine	Lipid	Fatty Acid Metabolism(Acyl Carnitine)	33952	LC/MS Pos Late	100001270	1350	372.311	18822-89-4	53477791		HMDB05066	0.2425	1.3458	1.2317	6.1306	11.529	16.3971	0.7741	0.6032	0.3452	0.6273	1.0271	1.492	3.8455	3.7753	1.7056	0.4672	0.3913	0.5501	0.7057	0.6137	1.0582	3.5539	6.0715	3.4256	0.1954	0.1254	0.2236	0.1973	0.1551	0.344	0.9796	1.5314	1.5096	0.4157	0.2657	1.1733	0.429	0.3913
N1-methyladenosine	Nucleotide	Purine Metabolism, Adenine containing	15650	LC/MS Pos Early	1242	2120	282.12	15763-06-1	27476	C02494	HMDB03331	1.5111	1.366	1.3238	1.6647	1.7709	2.2507	1.6618	1.878	2.0491	1.3765	1.4467	1.705	1.3877	1.824	1.8503	0.6896	0.7024	0.7442	1.556	1.5722	1.6379	1.2026	1.0515	1.1756	0.6556	0.6798	0.6909	0.8944	0.993	0.7824	1.2014	0.9996	1.2347	1.5697	1.5806	1.8018	1.0484	0.8988
N1-methylinosine	Nucleotide	Purine Metabolism, (Hypo)Xanthine/Inosine containing	48351	LC/MS Pos Early	100001409	1430	283.104	20245-33-4	65095		HMDB02721	1.6001	1.4168	0.2035	1.7326	1.1431	1.0364	1.2319	0.7781	1.6559	1	0.2035	0.2035	0.2035	0.2035	1.3684	0.2035	0.2035	0.2035	0.9348	0.2035	0.5375	0.2035	0.2035	1.2602	0.2035	0.2035	0.2035	0.2035	1.1933	0.2035	2.3837	0.2035	0.2035	1.908	0.2035	0.2035	0.6602	1.3517
N2,N2-dimethylguanine	Nucleotide	Purine Metabolism, Guanine containing	37081	LC/MS Pos Early	100001853	2465	180.088	1445-15-4	74047			0.6485	0.44	0.7155	0.9162	0.8705	0.8154	0.7768	0.8148	0.84	0.501	0.5477	0.5507	0.5167	0.4715	0.7042	0.6305	0.7201	0.5463	0.4294	0.804	0.6479	1.1471	1.3933	1.0378	0.9042	0.7205	0.4809	0.4845	0.5842	0.5739	0.445	0.512	0.4449	0.445	0.7085	0.7099	0.3828	0.6321
N2,N2-dimethylguanosine	Nucleotide	Purine Metabolism, Guanine containing	35137	LC/MS Pos Early	100001412	2210	312.13	2140-67-2	92919		HMDB04824	1.3503	1.227	0.7284	1.5229	1.4686	1.5925	1.6248	0.8438	1.6941	0.8761	1.0724	1.2191	0.2089	1.3314	1.3664	0.5246	0.5707	1.1421	1.1438	0.8154	1.1309	0.5212	0.597	1.7551	0.2089	0.3562	0.6526	0.2089	1.0831	1.2648	1.9915	0.9388	1.1396	1.0878	0.6301	0.8962	1.3185	1.0601
N6,N6,N6-trimethyllysine	Amino Acid	Lysine Metabolism	1498	LC/MS Pos Early	189	2825	189.16	23284-33-5	440120	C03793	HMDB01325	2.3844	2.2641	2.9359	1.0018	1.3843	1.471	2.0814	1.7441	2.2411	2.1604	1.8474	2.1286	1.8267	3.2986	3.8771	1.466	1.5157	1.8176	2.0649	1.1379	1.7755	1.8829	1.9545	3.2884	3.2799	3.1025	3.3019	2.6222	3.924	5.8917	3.4625	2.1618	3.4854	2.8333	1.4889	2.7056	1.6076	1.5551
N6,N6-dimethyladenosine	Nucleotide	Purine Metabolism, Adenine containing	42081	LC/MS Pos Early	100003867	2415	296.135	2620-62-4	348206			2.4921	1.8761	1.5154	0.7404	0.8856	1.2054	1.1505	0.906	2.2369	0.2085	0.6742	0.8422	0.2085	0.6969	1.145	0.5852	1.2403	1.232	1.0027	0.6461	1.0077	0.2085	0.2085	1.7661	0.2085	0.2085	0.3814	0.4692	0.8097	1.405	1.9843	1.1164	0.8155	0.9652	0.622	1.0448	1.7122	1.8008
N6-acetyllysine	Amino Acid	Lysine Metabolism	36752	LC/MS Neg	100001734	1059	187.109	692-04-6	92832	C02727	HMDB00206	2.0841	1.4406	3.7586	0.5133	1.0298	1.7233	1.1479	0.9153	2.6338	1.8097	1.8996	2.6149	1.6803	1.7705	3.9088	1.4964	1.9278	3.2312	2.2583	2.7011	2.8793	1.5005	2.1956	3.0136	1.5549	1.6695	2.9818	2.0108	2.4254	3.6154	1.2133	1.3495	2.6426	1.3593	2.3416	2.5245	1.7129	2.4407
N6-carboxymethyllysine	Carbohydrate	Advanced Glycation End-product	36713	LC/MS Pos Early	100001768	2500	205.118	5746-04-03				1.3229	1.2827	0.9508	0.6984	0.8546	0.9082	0.7898	0.8953	1.0567	1.2417	1.1915	1.3134	0.7778	1.3321	1.2919	1.5203	1.6573	1.727	1.0382	0.9863	0.9822	1.0283	0.9037	1.4305	0.9103	1.0054	1.0737	1.4351	1.6035	1.6788	1.2678	1.0258	1.0358	1.0632	0.8015	0.8703	0.9151	0.9634
N6-succinyladenosine	Nucleotide	Purine Metabolism, Adenine containing	48130	LC/MS Pos Early	100001664	1930	384.115	4542-23-8			HMDB00912	1.5239	3.1618	0.7214	1.1743	0.7691	1.4352	1.7752	1.119	3.5512	1.4221	1.6056	1.7141	0.6427	2.688	2.0909	0.8244	0.6999	2.1593	1.0731	0.4748	2.309	1.2461	0.6994	4.9747	0.1345	1.3403	1.6814	0.5676	1.9251	3.4735	2.0356	1.2062	1.5413	3.3689	0.9217	1.637	2.2214	1.4432
N-acetyl-1-methylhistidine*	Amino Acid	Histidine Metabolism	43255	LC/MS Pos Early	100004299	2100	212.103					1.1637	0.8444	0.7788	1.6524	0.9464	1.0342	1.4286	0.2289	0.8675	0.8116	1.4021	1.0191	1.0273	1.2272	1.2284	0.672	0.2289	0.7487	1.8609	2.113	2.3405	0.8785	0.9478	1.2325	0.2289	0.4608	0.9692	0.3926	0.7506	1	1.2681	1.1819	1.3126	1.2689	0.3629	0.9902	1.22	1.4538
N-acetylalanine	Amino Acid	Alanine and Aspartate Metabolism	1585	LC/MS Polar	1110	1564.8	130.051	97-69-8	88064	C02847	HMDB00766	1.5566	1.4773	1.5283	0.7207	0.7603	1.0025	1.8127	1.6148	1.9301	1.9528	1.5043	1.598	1.5803	1.5225	1.9296	1.0936	1.4086	1.3786	1.8964	1.7608	1.4024	1.6866	1.7448	1.848	1.9861	1.9689	1.8583	2.0083	2.5755	2.6912	1.6618	1.6434	1.8753	1.3991	1.7659	1.9395	1.0976	1.2999
N-acetylarginine	Amino Acid	Urea cycle; Arginine and Proline Metabolism	33953	LC/MS Neg	100001266	1145	215.115	155-84-0	67427	C02562	HMDB04620	1.2298	0.8544	2.1102	0.7334	0.4404	0.3341	0.9324	0.4616	0.4037	1.0065	2.0407	1.1098	0.5991	0.4306	0.6633	2.7666	1.4536	1.2767	0.7316	1.1513	0.7949	1.7462	2.4166	0.7685	1.3764	1.463	1.2855	0.5558	0.5344	0.7396	0.5289	1.0956	1.013	0.6425	0.7992	1.0787	1.5432	1.7303
N-acetylasparagine	Amino Acid	Alanine and Aspartate Metabolism	33942	LC/MS Pos Early	100001257	785	175.071	4033-40-3	99715		HMDB06028	0.8831	1.0145	0.4885	1.2691	0.9831	1.2622	1.1769	0.8039	1.2149	1.4482	1.3667	1.4139	0.2996	0.2996	1.0259	0.8584	0.9182	1.6307	1.6721	0.2996	0.857	0.9635	0.2996	1.0427	0.9937	2.9766	3.419	0.6031	2.2545	5.5994	1.0035	0.9455	1.7533	0.8099	0.8164	2.5909	3.6505	2.1111
N-acetylaspartate (NAA)	Amino Acid	Alanine and Aspartate Metabolism	22185	LC/MS Polar	100000787	3143	174.041	997-55-7;997-55-7	65065	C01042	HMDB00812	0.0791	0.6649	0.548	1.1321	3.0833	2.144	1.3951	1.1871	2.1617	2.6018	2.2964	3.9957	0.0791	1.1891	0.6962	0.2187	0.2733	2.047	0.0791	0.2849	0.7929	1.3885	2.0838	6.3148	0.5804	0.0791	1.3043	0.0791	0.0791	0.2047	0.7642	0.4064	1.4132	1.005	1.0285	0.786	0.8724	0.5215
N-acetyl-beta-alanine	Nucleotide	Pyrimidine Metabolism, Uracil containing	37432	LC/MS Polar	100002102	1762.4	130.051	3025-95-4	76406	C01073		4.2532	2.5722	3.7217	1.4599	1.3139	1.3315	1.6341	1.5001	1.1159	1.1678	1.7406	1.2664	0.768	0.5673	0.4127	1.3014	1.3655	1.2133	1.3227	1.5203	1.2275	1.0617	1.1969	1.0884	1.4048	1.0342	0.9417	0.9984	0.7887	0.9537	0.7316	1.0973	0.7374	1.0143	1.2208	1.715	1.2104	1.3156
N-acetylcysteine	Amino Acid	Methionine, Cysteine, SAM and Taurine Metabolism	1586	LC/MS Pos Early	1107	1416	164.038	616-91-1	12035	C06809	HMDB01890	4.8846	1.5963	0.9882	0.6189	0.4419	0.626	0.3187	0.2588	0.2588	0.364	0.2588	0.3653	0.2588	0.4861	0.716	0.2588	1.9932	1.2762	1.3076	1.0486	1.6894	0.4168	0.2588	1.2159	0.2588	0.2588	0.9417	0.2588	1.6214	2.915	2.4636	1.8269	0.7435	1.2498	1.1939	1.261	0.857	0.5278
N-acetyl-glucosamine 1-phosphate	Carbohydrate	Aminosugar Metabolism	15741	LC/MS Polar	1212	4052	300.049	31281-59-1	440364	C04256	HMDB01367	1.4309	0.917	0.9538	0.6575	0.4524	0.6315	1.096	1.0896	1.0908	0.9314	1.0451	0.9108	0.8362	0.7478	0.7806	1.1783	1.1901	0.9442	0.9329	1.0177	0.7948	0.921	1.0516	1.0704	1.4244	1.7242	1.6519	1.1462	0.9159	1.1887	1.1493	1.2032	1.1463	1.1411	1.3208	1.3096	1.0154	0.935
N-acetylglucosamine 6-phosphate	Carbohydrate	Aminosugar Metabolism	15107	LC/MS Polar	1213	4114	300.049	102029-88-9	439219	C00357	HMDB02817	1.3295	1.8075	1.4444	2.1219	1.8036	1.3986	1.7782	1.8268	2.3017	1.3255	1.8465	1.4895	1.4145	1.4687	1.4527	1.6145	1.5733	1.3047	1.8298	2.1438	1.6785	1.9778	2.455	2.0773	1.1548	0.904	0.8084	1.2965	1.4239	1.6613	1.3133	1.9642	1.4174	1.401	1.3332	1.3356	1.0623	1.9759
N-acetylglucosamine/N-acetylgalactosamine	Carbohydrate	Aminosugar Metabolism	46539	LC/MS Pos Early	100006435	715	222.097					0.9514	1.0881	1.1607	1.5497	1.3841	1.2255	1.3514	1.2925	1.3954	1.0539	1.6427	1.3204	1.4905	1.7647	1.8685	1.115	0.7495	0.9689	1.237	1.0363	1.3244	1.2121	1.1492	1.3539	1.3611	1.3373	1.4184	0.7961	1.0774	1.1932	1.0504	1.1162	1.1745	1.361	0.7459	1.3479	1.3574	1.6894
N-acetylglutamate	Amino Acid	Glutamate Metabolism	15720	LC/MS Polar	100000282	3106	188.056	5817-08-03	70914	C00624	HMDB01138	0.55	0.3674	0.47	0.5877	0.3036	0.3414	1.2058	1.0002	1.0589	1.4275	0.4829	1.0038	0.3385	0.7233	0.9405	1.3247	1.4628	1.7337	1.1881	0.6928	0.6117	0.9814	0.7769	0.9752	0.7366	1.2988	1.0336	1.4204	1.2593	1.0731	1.1467	0.3772	1.3445	0.7638	0.5421	1.2279	0.8586	0.5332
N-acetylglutamine	Amino Acid	Glutamate Metabolism	33943	LC/MS Polar	100001253	2140	187.072	2490-97-3	182230	C02716	HMDB06029	1.9702	1.3394	1.2914	0.825	0.8954	0.411	0.9026	0.9574	0.8346	1.2425	0.9564	1.3496	0.5575	0.8166	0.9176	1.15	0.8591	1.2209	1.115	1.0692	0.8741	1.3959	1.7517	1.2484	1.8362	3.6041	3.8015	0.9322	1.8396	2.6002	0.675	0.7007	1.2788	0.5078	0.5854	1.7747	1.8318	1.1275
N-acetylglycine	Amino Acid	Glycine, Serine and Threonine Metabolism	27710	LC/MS Pos Early	100001006	826	118.05	543-24-8	10972		HMDB00532	1.1847	1.1783	0.8688	1.0946	1.0629	1.1167	1.8594	1.8114	1.9956	0.9943	1.0611	1.3305	0.7011	1.1327	1.0535	1.1211	0.961	1.1448	0.9234	0.7343	1.1177	1.0747	0.2349	1.2682	0.2349	1.1595	1.5453	0.2349	1.2018	1.6712	0.9645	0.6865	1.1264	1.0808	0.6078	1.8202	1.4819	1.1178
N-acetylhistamine	Amino Acid	Histidine Metabolism	48679	LC/MS Pos Early	100006123	2287	154.097	673-49-4	69602	C05135	HMDB13253	0.073	0.0622	0.0817	0.602	0.3417	0.1255	0.0484	0.0447	0.0356	0.0786	0.1025	0.0948	0.0382	0.034	0.0608	0.0738	0.1116	0.0948	0.0535	0.0869	0.0811	0.0471	0.0554	0.0589	0.1297	0.1908	0.0839	0.2393	0.0799	0.1088	0.0339	0.0407	0.0623	0.0552	0.0651	0.068	0.0993	0.0945
N-acetylhistidine	Amino Acid	Histidine Metabolism	33946	LC/MS Neg	100001293	900	196.073	39145-52-3	75619	C02997	HMDB32055	2.0689	1.2194	2.0382	1.1472	1.5121	1.034	1.4919	1.01	0.8292	0.4429	0.5713	0.8409	0.9304	0.8306	1.2836	0.3871	0.6769	0.7969	0.849	1.0701	0.7951	1.0143	1.3941	1.1279	1.5132	1.7024	1.3292	1.1101	1.3833	1.8392	0.9805	0.9898	1.564	1.1439	1.5804	2.1262	1.2048	1.8293
N-acetylleucine	Amino Acid	Leucine, Isoleucine and Valine Metabolism	1587	LC/MS Neg	1082	2400	172.098	1188-21-2	70912	C02710	HMDB11756	2.5558	1.9416	3.0104	0.5377	1.1884	0.6262	0.9946	0.7344	0.8503	1.0618	1.5736	1.5268	2.5905	1.1373	1.6493	1.2208	0.8645	1.5163	1.8156	1.2787	0.2741	1.427	1.8695	1.5544	4.4041	3.9668	2.3284	2.4096	2.579	2.6665	1.3739	1.4498	1.2798	1.3017	1.1248	1.9673	2.0101	1.7182
N-acetylmethionine	Amino Acid	Methionine, Cysteine, SAM and Taurine Metabolism	1589	LC/MS Neg	1083	1787	190.054	65-82-7	448580	C02712	HMDB11745	0.8217	0.5637	1.4484	0.3512	0.261	1.6801	0.9025	0.5602	2.2106	0.7175	0.7186	2.3493	0.7084	1.7926	3.406	1	1.8378	0.7881	0.7244	0.856	2.301	1.0258	1.3536	2.9589	1.6462	1.7856	2.1227	1.6572	9.5447	3.6081	0.7864	0.7168	2.4705	3.7225	0.8276	2.414	4.951	0.5823
N-acetylmethionine sulfoxide	Amino Acid	Methionine, Cysteine, SAM and Taurine Metabolism	45428	LC/MS Neg	100005463	942	206.049		193368			2.5873	1.2175	2.8664	1.7806	1.7572	1.6407	1.1534	0.6594	0.945	0.8115	0.703	1.1672	1.3165	1.2375	2.3001	2.0033	1.8555	2.3483	1.0296	1.2145	1.1496	1.497	1.5943	1.9275	1.3695	1.2685	1.2204	1.2912	1.4808	1.382	1.327	1.1006	1.5991	1.023	1.0863	2.0643	2.9739	3.1536
N-acetylphenylalanine	Amino Acid	Phenylalanine and Tyrosine Metabolism	33950	LC/MS Neg	100001256	2597	206.082	2018-61-3	74839	C03519	HMDB00512	1.4702	1.3729	2.4525	0.1925	0.3609	0.1925	0.8254	0.1925	0.9003	0.9716	1.2212	1.4328	1.635	0.7387	1.7148	0.5124	0.9548	0.7354	2.2011	1.1128	0.8504	1.0918	1.8421	1.4742	2.7284	2.971	2.2129	1.3917	2.0302	2.6289	1.2824	1.299	1.518	0.7116	1.4598	2.1885	2.7448	1.9064
N-acetylputrescine	Amino Acid	Polyamine Metabolism	37496	LC/MS Pos Early	192	2230	131.118	18233-70-0	122356	C02714	HMDB02064	0.6525	0.6813	0.8592	1.2857	0.7652	0.3809	0.7904	0.7429	0.6364	0.5837	0.7093	0.4078	0.5762	0.7916	0.9808	0.5809	0.2505	0.3877	1.2486	0.949	0.5735	0.7584	0.674	0.8303	0.7999	0.4008	0.4096	0.2918	0.3179	0.4791	0.1616	0.2679	0.6083	0.3574	0.3108	0.6455	0.9031	0.7314
N-acetylserine	Amino Acid	Glycine, Serine and Threonine Metabolism	37076	LC/MS Polar	100001851	2000	146.046	97-14-3	65249		HMDB02931	1.3825	1.2007	1.1383	0.8231	0.7368	0.7779	1.4771	1.3025	1.4788	1.7129	1.4977	1.6065	1.6216	1.3895	1.5535	1.0415	1.0669	1.02	1.6255	1.4207	1.1244	1.4508	1.532	1.7043	1.8341	2.6033	2.3911	1.7794	2.4087	2.8508	1.8771	1.4662	1.9084	1.2865	1.45	1.9327	1.9461	1.6504
N-acetyltaurine	Amino Acid	Methionine, Cysteine, SAM and Taurine Metabolism	48187	LC/MS Neg	100005466	800	166.018		159864			0.2844	0.2844	0.2844	1.4003	1.1035	1.1211	0.6135	0.5426	0.2844	0.6051	0.9598	0.7454	1.9064	1.2399	1.5238	0.8349	0.4768	0.2844	1.3876	1.8017	1.3096	0.7947	0.8676	0.4191	0.5146	0.4804	0.584	0.2844	0.2844	0.2844	0.8109	1.1791	0.5055	0.9726	1.2786	1.041	1.0986	2.0731
N-acetylthreonine	Amino Acid	Glycine, Serine and Threonine Metabolism	33939	LC/MS Polar	100001274	1700	160.062	17093-74-2	152204			1.3617	1.0281	1.06	0.8762	0.6987	0.7984	1.042	0.9821	1.0005	1.3995	1.4518	1.0769	1.7406	0.9469	1.2548	1.1045	1.2045	1.006	1.3016	1.4274	1.0095	1.815	1.6118	1.7101	2.2118	3.8545	3.0766	1.5393	1.8608	4.2206	1.2201	1.706	2.481	0.9678	1.2999	2.5816	1.9476	2.7708
N-acetylvaline	Amino Acid	Leucine, Isoleucine and Valine Metabolism	1591	LC/MS Neg	1084	1704	158.082	96-81-1	66789		HMDB11757	1.5314	1.2935	1.8883	0.9345	0.7774	0.9782	1.4545	1.1203	1.1089	1.2387	1.0586	1.2713	2.2267	1.3459	1.744	1.1251	1.2785	1.3833	1.5476	1.2178	1.135	1.3882	1.5614	1.2229	2.0364	1.8994	2.058	1.7961	2.0466	2.2146	1.5171	1.7249	1.5219	1.0367	1.2018	1.7609	1.5264	1.8247
N-alpha-acetylornithine	Amino Acid	Urea cycle; Arginine and Proline Metabolism	32984	LC/MS Pos Early	100000285	2000	175.108	6205-08-09	439232	C00437	HMDB03357	1.4917	1.2834	0.9057	1.8955	1.1703	1.0859	1.6193	0.2918	1.8552	0.8993	1.3514	1.3384	0.4576	1.3559	1.4366	0.8775	0.2918	0.9042	0.9437	0.729	0.7391	0.2918	0.6531	1.2104	0.8075	1.0729	1.3124	0.2918	1.1788	1.6113	1.0133	0.751	0.7328	1.0814	0.519	0.933	1.6411	1.1138
N-delta-acetylornithine	Amino Acid	Urea cycle; Arginine and Proline Metabolism	43249	LC/MS Pos Early	100004523	1877	175.108		9920500			2.3433	2.1931	1.0525	1.3588	1.0853	1.1229	1.8278	1.3625	2.3102	0.7896	0.7359	1.1838	0.2856	0.8264	0.7002	0.7521	0.6236	0.8295	0.4452	0.3804	0.5396	0.8364	0.821	2.2245	0.4154	0.7653	1.1921	0.6234	2.0307	4.2422	3.0428	2.3421	2.7365	1.5245	0.9245	1.7504	1.8918	1.8466
nicotinamide	Cofactors and Vitamins	Nicotinate and Nicotinamide Metabolism	594	LC/MS Pos Early	432	1942	123.055	98-92-0	936	C00153	HMDB01406	0.8144	1.1171	0.4778	1.2085	0.8949	1.2447	1.323	1.0558	1.3092	1.4745	0.9105	1.187	0.7133	1.3163	1.5132	0.3006	0.4921	1.0268	1.4139	0.7266	1.3304	0.4763	0.373	1.1334	0.4967	0.431	0.9149	0.3006	0.9436	1.1317	0.9693	0.5298	0.9948	1.0997	0.4257	0.9314	1.2196	0.5427
nicotinamide ribonucleotide (NMN)	Cofactors and Vitamins	Nicotinate and Nicotinamide Metabolism	22152	LC/MS Pos Early	1312	766	335.064	1094-61-7	14180	C00455	HMDB00229	0.3286	1.6932	0.6929	47.5777	46.7941	42.0287	1.2575	0.7106	0.825	0.663	1.8332	1.4907	0.1609	0.4478	0.1609	0.53	0.1609	1	0.3845	0.1609	1.1069	0.1609	0.1609	0.419	0.1609	0.1609	0.1609	0.1609	0.2253	0.1609	0.5395	1.4931	0.4884	0.1609	0.1609	0.1609	0.5246	1.6954
nicotinamide riboside	Cofactors and Vitamins	Nicotinate and Nicotinamide Metabolism	33013	LC/MS Pos Early	100001310	2040	255.098	1341-23-7	439924	C03150	HMDB00855	0.9155	1.0798	0.7241	0.8657	0.691	1.111	1.149	0.9539	1.1444	0.8222	0.8226	0.9953	0.3964	1.2122	1.037	0.7206	0.274	1.1392	1.1276	0.9303	1.3579	0.7091	0.626	1.1335	0.5705	0.258	0.844	0.5379	1.0145	0.9036	1.1915	0.7258	1.2271	1.0356	0.6238	0.9253	0.9991	0.7058
nicotinate	Cofactors and Vitamins	Nicotinate and Nicotinamide Metabolism	1504	LC/MS Neg	567	1180	122.025	59-67-6	938	C00253	HMDB01488	1.7866	1.3487	2.0917	1.2856	1.0352	1.0592	1.1765	1.6594	1.1722	1.078	0.6974	1.3158	2.0639	1.1529	1.4289	1.1481	0.782	1.7973	1.2207	0.9528	1.3872	1.527	1.223	1.3421	1.7551	1.5965	2.4438	1.9178	3.6495	2.698	0.9594	1.0807	1.5437	1.4634	1.3929	1.6658	2.0927	1.3549
nicotinate ribonucleoside	Cofactors and Vitamins	Nicotinate and Nicotinamide Metabolism	33471	LC/MS Pos Early	100001316	1536	256.082	2625-49-2	161234	C05841	HMDB06809	3.2394	2.5223	1.3354	2.5754	1.4154	0.8926	2.2351	1.3623	1.6227	0.9684	0.1111	0.8984	0.8662	1.1224	1.528	0.8764	1.9169	2.1331	0.7888	0.1111	0.1111	0.1111	0.1111	2.4773	1.3306	1.8979	2.7572	0.1111	1.8547	2.8123	1.318	0.6358	2.4075	1.1887	0.1111	1.9498	3.112	1.6501
N-methylalanine	Amino Acid	Alanine and Aspartate Metabolism	37069	LC/MS Pos Early	100001823	1536	104.071	600-21-5	5288725;6971259	C02721	HMDB01906	1.2093	1.1484	0.5176	0.8227	1	0.5175	1.4409	0.8625	1.3449	0.6569	0.5989	0.9276	0.2679	0.8139	0.8043	0.3839	0.2679	0.5218	0.3623	0.3391	0.3525	1.4955	0.2679	0.9734	0.2679	0.4998	0.6154	0.2679	1.0639	0.2679	0.7359	1.0245	0.6109	0.7625	0.2679	0.9736	1.0188	0.9981
N-monomethylarginine	Amino Acid	Urea cycle; Arginine and Proline Metabolism	43586	LC/MS Pos Early	100004488	2845	189.135	53308-83-1	132862	C03884	HMDB29416	1.7861	1.3986	1.2848	1.1448	1.293	1.573	1.2475	1.2252	1.1309	1.331	1.0769	1.2694	1.1981	1.7887	1.6028	0.9011	0.863	0.8815	1.8056	1.6194	1.5404	1.0141	1.1037	2.2438	0.9259	1.2339	1.2706	1.5963	1.9914	1.7184	2.425	1.8353	1.9444	1.3312	1.4285	1.5575	1.0483	0.9009
nonadecanoate (19:0)	Lipid	Long Chain Fatty Acid	1356	LC/MS Neg	892	6068	297.28	646-30-0	12591	C16535	HMDB00772	0.9786	1.0778	0.9068	1.3987	1.1999	2.1311	1.2474	1.4178	1.5694	0.9404	0.8428	0.5479	1.4899	1.3989	0.5203	1.1276	1.253	1.1499	1.1399	1.7549	1.376	1.1974	1.4552	1.1659	1.1188	1.0218	0.915	1.0057	0.9905	0.6063	1.1386	0.9988	1.257	1.1148	1.1248	0.6275	0.9645	0.9451
N-palmitoyl-sphinganine (d18:0/16:0)	Lipid	Sphingolipid Metabolism	52604	LC/MS Pos Late	100009028	3090	540.535	5966-29-0	5283572		HMDB11760	1.1289	1.5046	1.0954	0.626	0.9483	0.8791	1.2952	1.3397	1.4572	0.8806	0.852	0.8699	1.0963	1.4573	0.9917	1.143	1.1737	1.2287	1.3973	1.238	1.5279	1.1387	1.2828	1.2291	0.9024	0.9424	1.0495	1.354	1.64	1.0678	1.6184	1.4356	1.6334	0.8792	0.6261	0.6893	1.3498	1.2129
N-palmitoyl-sphingosine (d18:1/16:0)	Lipid	Sphingolipid Metabolism	44877	LC/MS Pos Late	1518	2893	538.519	24696-26-2	5283564		HMDB04949	1.4274	1.6032	1.3859	0.9638	1.5381	1.6775	1.3141	1.8005	1.3817	0.862	0.7125	0.8815	1.1549	1.5815	1.0886	1.4073	1.6337	1.5355	2.155	2.2363	2.2159	1.2889	1.1513	1.682	1.1357	1.2367	1.3709	1.4039	1.6522	1.4783	1.8304	1.3999	1.5975	1.4005	0.9402	1.1664	1.3128	1.2196
oleate/vaccenate (18:1)	Lipid	Long Chain Fatty Acid	52285	LC/MS Neg	100008930	5655	281.249					1.2486	1.1029	0.6619	1.0615	1.2206	1.5963	1.0247	1.0515	1.1929	0.9283	0.8696	0.485	0.9939	0.8491	0.2301	1.0371	1.08	1.0715	0.9548	1.3984	0.9452	1.0408	1.1466	1.0595	1.0856	0.8602	0.733	0.9793	1.0322	0.5625	1.0932	1.0529	1.1503	0.9947	0.9744	0.475	1.0776	1.1695
oleoylcarnitine	Lipid	Fatty Acid Metabolism(Acyl Carnitine)	35160	LC/MS Pos Late	100001501	1423	426.358	38677-66-6	6441392;53477789		HMDB05065	1.4089	0.9899	0.9128	0.9011	1.5686	1.9846	1.2007	1.0009	1.0517	0.8998	0.9576	1.3981	0.9995	1.0674	0.7531	1.1699	1.7578	2.3318	1.3984	1.3835	1.9481	1.057	1.3933	1.6932	0.6422	0.4867	1.0123	1.0546	0.7861	1.0498	1.8617	1.2734	1.8228	0.8613	0.8631	1.7689	1.5485	1.2212
oleoylcholine	Lipid	Phospholipid Metabolism	53260	LC/MS Pos Late	100009331	1449	368.352					2.7677	1.8145	0.2852	0.3145	0.2852	0.2852	1.0041	1.0142	0.2852	1.3357	0.2852	0.2852	1.3971	2.1503	1.0534	1.331	0.2852	0.8032	2.2559	0.2852	0.6363	0.2852	0.2852	0.2852	1.3304	0.7478	1.0268	2.954	2.908	2.5167	2.8198	0.2852	0.9978	1.6688	1.4987	1	1.5267	0.2852
ornithine	Amino Acid	Urea cycle; Arginine and Proline Metabolism	1493	LC/MS Pos Early	444	2800	133.097	3184-13-2	6262	C00077	HMDB03374	1.4057	1.3411	1.5905	1.9493	1.3362	1.2878	6.1043	4.4661	6.4099	1.1793	1.4158	1.2474	1.0984	0.9972	1.3846	0.9899	0.7991	0.9076	1.1176	0.9751	0.9071	1.0147	0.9468	1.0032	1.1722	1.1698	0.9834	0.5987	0.6842	0.9507	0.7763	0.6431	0.9658	0.8418	0.3182	1.0102	1.7229	1.2525
orotate	Nucleotide	Pyrimidine Metabolism, Orotate containing	1505	LC/MS Polar	445	1638.1	155.01	50887-69-9	967	C00295	HMDB00226	0.5084	0.4401	0.5524	2.2986	1.8141	1.7637	1.128	0.9547	0.9398	0.6857	0.6856	0.7246	1.8299	1.2684	1.1205	0.8137	0.6071	0.6277	1.0674	1.0521	0.8967	0.628	0.6595	0.8098	0.8493	1.0651	0.8444	0.8122	0.5125	0.6295	0.6851	0.5295	1.0776	0.524	0.4943	0.4695	1.178	0.7267
O-sulfo-L-tyrosine	Xenobiotics	Chemical	45413	LC/MS Neg	100005384	990	260.023		514186			1.5353	1.2086	1.9746	0.6416	0.9066	1.0228	1.4084	1.114	0.9054	1.4518	0.7788	1.2525	0.9121	0.949	1.4649	1.1438	0.7684	1.4169	1.4268	0.9768	1.3072	1.287	1.0839	1.6306	1.4466	0.9372	1.4939	1.6257	2.7469	3.2009	0.9004	1	1.3367	1.9568	0.8993	1.2632	1.0386	0.8665
oxalate (ethanedioate)	Cofactors and Vitamins	Ascorbate and Aldarate Metabolism	20694	LC/MS Neg	100000841	603	88.988	144-62-7	971	C00209	HMDB02329	0.8585	0.9532	1.8872	2.3211	1.3986	0.8878	1.7645	0.8009	0.7152	0.8099	1.3972	1.0575	2.1536	0.7499	0.9254	1.7611	0.4495	0.8828	0.8934	0.7247	0.9463	0.9324	0.7712	0.9454	0.8602	0.8861	1.1311	0.9016	0.7117	0.8124	1.1677	0.633	1.0137	0.5955	0.545	0.678	2.1987	1.0017
oxaloacetate	Energy	TCA Cycle	47173	LC/MS Neg	447	575	130.999	328-42-7	970	C00036	HMDB00223	0.01	0.01	0.01	0.01	0.01	2.1632	0.1747	0.2132	0.5263	0.01	1.6697	1.2006	0.2446	1.8791	1.5978	0.01	1.4703	0.01	0.01	1.3909	0.4881	0.01	1.8237	2.1977	0.01	2.6518	0.0839	0.588	10.7817	2.9102	0.01	0.9219	0.1493	4.3394	2.9028	3.1552	2.2087	0.7853
palmitate (16:0)	Lipid	Long Chain Fatty Acid	1336	LC/MS Neg	424	5618	255.233	57-10-3	985	C00249	HMDB00220	0.9933	0.9047	0.6136	1.0373	1.0665	1.535	0.9789	1.1002	1.1748	0.9607	0.8807	0.5483	1.0089	0.8929	0.32	0.9658	1.1863	1.1835	0.8978	1.3641	0.9982	1.1146	1.2472	1.0581	0.9807	0.8124	0.7868	0.9504	0.8438	0.5455	0.9785	0.9286	0.9698	0.9659	0.8838	0.5046	0.9652	1.0721
palmitoleate (16:1n7)	Lipid	Long Chain Fatty Acid	33447	LC/MS Neg	452	5475	253.217	373-49-9	445638	C08362	HMDB03229	1.0941	1.0621	0.6289	0.7893	1.0019	1.2089	0.9451	0.9569	1.1203	0.839	0.8526	0.6014	0.7606	0.6695	0.3701	0.8937	1.0256	0.8087	0.8866	1.278	0.8622	0.9455	0.9672	0.9032	0.9181	0.8508	0.6656	0.8019	0.7398	0.5874	0.8627	1.0262	0.8816	0.8717	0.9114	0.6707	0.7919	0.882
palmitoleoylcarnitine*	Lipid	Fatty Acid Metabolism(Acyl Carnitine)	53223	LC/MS Pos Late	100009406	1357	398.326					0.1611	0.8077	1.0139	3.2134	7.8305	18.6778	0.9187	0.5563	0.5407	0.8396	1.3116	2.0482	2.9789	2.4964	1.1808	0.5125	0.4349	0.6728	0.9226	0.7718	1.248	2.8786	4.2038	5.1929	0.1612	0.1588	0.2474	0.2228	0.099	0.247	1.3626	1.2598	1.7551	0.3845	0.2687	1.6756	0.6809	0.6333
palmitoloelycholine	Lipid	Phospholipid Metabolism	53257	LC/MS Pos Late	100009334	1385	340.321					2.3355	1.6747	1.8098	0.3279	0.6784	0.8066	0.916	1.2732	1.1097	1.1839	0.8541	0.7236	0.9631	1.1994	0.876	1.5463	1.9689	1.565	1.6508	1.9751	1.4566	1.4828	1.3977	1.5293	0.8462	1.1506	1.032	1.6835	1.5289	1.867	2.1207	1.244	1.2553	1.7383	2.3971	1.862	0.8797	0.8811
palmitoylcarnitine	Lipid	Fatty Acid Metabolism(Acyl Carnitine)	44681	LC/MS Pos Late	100000776	1425	400.342	6865-14-1	461	C02990	HMDB00222	1.4728	1.1042	0.9998	0.7142	1.2894	1.6249	1.15	1.452	0.9291	0.9162	0.6977	1.2565	0.8687	1.2213	0.6036	1.1474	1.5593	1.6384	1.1857	1.2515	1.5998	0.9412	1.2772	1.4367	0.595	0.5583	0.8185	0.8747	0.8758	1.024	1.5724	1.2649	1.3636	0.8815	0.8423	1.3708	1.1101	1.0964
palmitoylcholine	Lipid	Fatty Acid Metabolism (Acyl Choline)	52944	LC/MS Pos Late	100009233	1482	342.337		151731			1.7953	1.525	1.1322	0.5207	0.4687	0.4687	0.4687	0.9933	0.7201	0.7141	0.4687	0.7738	1.2781	0.845	1.3261	0.4687	1.2616	1.2391	1.0593	0.4687	0.4687	0.9097	0.4687	0.4687	0.8335	0.8612	0.4687	0.9693	0.8993	0.4687	1.3304	0.4687	0.4687	1.4534	1.3279	0.8133	0.8215	0.4687
panose	Xenobiotics	Food Component/Plant	37284	LC/MS Polar	100002109	4503.4	549.167	33401-87-5	5288421	C00713	HMDB11729	1.9645	1.1589	1.2231	1.4938	1.4214	2.057	0.9837	1.5464	0.6403	1.2993	1.7632	1.3693	0.8967	0.9981	0.6733	3.4634	4.2466	3.2246	0.9947	1.6146	1.126	2.0464	2.4112	2.8409	2.3451	2.4764	1.6886	1.7371	1.542	1.2871	1.7101	2.1006	1.5918	2.2068	3.0813	1.7549	0.9367	1.203
pantethine	Cofactors and Vitamins	Pantothenate and CoA Metabolism	39791	LC/MS Neg	100002991	3590	553.237	16816-67-4	452306	C12661	HMDB03828	0.3198	0.3198	1.2784	0.3198	0.3198	0.3198	0.3198	0.3198	0.3198	0.3198	0.3198	0.3198	0.3198	0.3198	0.3198	0.3198	0.6687	0.3198	0.3198	0.3198	0.7384	0.3198	0.4009	0.3198	0.3198	0.3198	0.3198	0.3198	0.3198	0.3198	0.3198	0.8376	1.1617	0.3198	0.3198	0.3198	0.3198	0.5403
pantothenate	Cofactors and Vitamins	Pantothenate and CoA Metabolism	1508	LC/MS Polar	1024	1620	218.103	137-08-6	6613	C00864	HMDB00210	1.3803	1.4227	1.2999	0.9436	0.8882	1.1855	1.0428	1.0832	0.8971	0.6675	0.7637	0.8046	1.5389	1.2323	1.3282	1.1821	1.3316	1.3103	1.2561	1.4526	1.3453	0.8451	0.8762	0.8637	1.1632	1.4122	1.5573	1.2553	1.5728	1.4218	0.9383	1.1282	1.1546	0.9904	0.9706	1.0127	1.4615	1.6317
pentadecanoate (15:0)	Lipid	Long Chain Fatty Acid	1361	LC/MS Neg	980	5521	241.217	1002-84-2;10002-84-2	13849	C16537	HMDB00826	1.0311	0.8726	0.6612	1.3473	1.4162	1.3564	1.1885	1.0453	1.4541	1.0768	1.2434	0.7859	1.0958	0.9554	0.5568	0.9779	0.9945	0.9368	0.9229	1.2013	0.8431	0.915	1.0999	0.9926	0.9656	1.0815	1.0387	0.9111	0.8843	0.6531	1.0128	0.9848	1.1196	1.3611	0.7665	0.5742	1.091	0.9298
phenylalanine	Amino Acid	Phenylalanine and Tyrosine Metabolism	64	LC/MS Pos Early	460	2878	166.086	63-91-2	6140	C00079	HMDB00159	2.433	2.0805	1.907	0.9605	1.235	1.0964	1.934	1.8137	1.6888	2.0652	1.2699	1.4653	2.547	2.5927	2.5825	1.7131	1.4307	1.4834	2.1853	1.5856	1.6189	1.9626	1.6446	1.9439	2.992	2.2287	2.1985	2.7323	3.1948	3.3155	2.3781	1.3828	2.0652	2.1638	1.672	1.8635	1.6379	1.2149
phenylalanylalanine	Peptide	Dipeptide	41374	LC/MS Pos Early	100003589	2909	237.123	3918-87-4	6993123;5488196			1.7166	5.1484	5.7399	1.9137	2.1672	1.3237	3.6242	1.5695	2.459	1.4902	3.1156	2.5088	0.1038	4.5847	2.4969	2.023	0.895	2.5063	1.6976	0.8648	2.4606	1.8636	1.8507	2.7684	1.4788	1.0802	1.4235	1.0025	2.0569	2.8221	1.8132	2.1504	1.7858	4.5121	0.8607	1.792	1.4698	1.1778
phenylalanylglycine	Peptide	Dipeptide	41370	LC/MS Pos Early	100003588	2898	223.108	721-90-4	98207			1.8395	3.291	3.862	1.1905	1.219	1.1903	1.6216	1.2008	1.6658	1.2252	1.8883	1.8802	0.9672	2.1389	1.4535	1.6731	1.228	1.7721	1.6239	1.4032	1.9748	1.708	1.7249	1.8436	1.2232	1.0672	1.1176	1.2709	1.4829	1.8926	1.4821	1.8882	1.4838	2.8386	1.1684	1.472	1.0359	1.0808
phenyllactate (PLA)	Amino Acid	Phenylalanine and Tyrosine Metabolism	22130	LC/MS Neg	100000774	2208	165.056	828-01-3	3848	C05607	HMDB00779	3.1543	5.703	3.1615	0.9022	0.1596	0.8992	2.6525	1.2744	1.4592	0.1596	0.9465	0.1596	1.3734	0.8443	0.7311	2.6577	0.6948	2.0584	0.4283	0.1596	0.5163	1.8636	4.028	4.3833	2.526	8.5086	11.407	1.7138	3.9285	9.3197	0.1596	0.968	2.4278	0.8219	1.1241	5.9417	8.358	6.2235
phosphate	Energy	Oxidative Phosphorylation	42109	LC/MS Neg	461	608	96.9696	7664-38-2	1061	C00009	HMDB01429	1.2679	1.0479	1.0736	1.0462	1.0359	1.2075	1.0398	1.1085	0.9921	0.9352	1.052	0.9408	0.9696	0.9878	0.9184	1.0281	1.0919	1.0632	1.1474	1.231	1.1179	1.1304	1.089	1.1213	1.0801	1.1389	1.1004	1.1316	1.1896	1.2387	1.1543	1.3952	1.0109	1.1622	1.444	1.2595	1.09	1.303
phosphoenolpyruvate (PEP)	Carbohydrate	Glycolysis, Gluconeogenesis, and Pyruvate Metabolism	597	LC/MS Polar	463	4212	166.975	10526-80-4	1005	C00074	HMDB00263	9.1546	1.579	0.4168	2.4782	2.215	3.7051	0.9417	1.4005	5.246	6.6049	1.4272	3.6564	0.7289	2.5699	3.4296	1.9165	2.4388	1.2789	9.9852	3.7432	2.2508	1.5023	5.7107	1.7417	0.5176	0.7085	0.4985	6.9081	2.8387	1.5089	11.8545	2.9152	3.7364	0.6593	1.172	3.3123	0.8253	1.7627
phosphoethanolamine	Lipid	Phospholipid Metabolism	1600	LC/MS Polar	1026	4559.1	140.012	1071-23-4	1015	C00346	HMDB00224	0.76	0.6592	0.8383	1.4604	1.2669	1.5735	1.2495	1.3711	1.1151	2.2474	2.349	2.3054	1.5217	1.5932	1.4908	1.167	0.968	0.8953	1.1545	1.3793	1.2946	1.0377	1.0445	0.9629	0.8661	1.1617	1.2248	0.8934	0.8399	0.891	0.7561	0.8969	0.9157	0.7892	0.9154	0.9807	0.9102	1.0627
phosphopantetheine	Cofactors and Vitamins	Pantothenate and CoA Metabolism	15504	LC/MS Pos Early	100000328	1372	359.104	NA	987	C01134	HMDB01416	0.5094	1.2961	0.6118	0.6553	0.0717	0.3954	0.3327	0.0717	1.0585	0.0717	0.0717	0.2373	0.0717	0.0717	0.0717	0.2522	0.2022	0.8924	0.3397	0.0717	0.6849	0.0717	0.0717	0.8851	0.0717	0.0717	0.1096	0.0717	0.0717	0.0717	0.76	0.6387	0.5158	0.0717	0.0717	0.0717	1.073	0.4747
phosphothreonine	Amino Acid	Glycine, Serine and Threonine Metabolism	37453	LC/MS Pos Early	100002076	605	200.032	27530-80-9	1016	C12147		0.3305	1.0003	0.3305	1.1365	0.9997	0.6234	0.6461	0.3305	0.3305	0.7345	1.1174	1.1215	0.3305	0.5524	0.3305	0.3305	0.3305	0.3305	0.3305	0.3305	0.3305	0.3305	0.3305	0.8488	0.3305	0.3305	0.3305	0.3305	0.3305	0.3305	0.9733	0.9018	0.3305	0.3305	0.3305	0.3305	1.4375	1.0896
phytosphingosine	Lipid	Sphingolipid Metabolism	1510	LC/MS Pos Late	469	1367	318.3	554-62-1	122121	C12144	HMDB04610	0.5077	0.427	0.6725	3.1857	2.218	1.6467	3.0838	1.8228	1.0882	2.6276	2.8097	1.2163	1.7834	2.2482	2.8061	1.7532	1.0132	1.3171	1.2011	1.4819	0.886	2.56	1.707	3.0033	2.8488	2.2634	1.8002	1.8977	1.0713	2.3934	2.0174	1.2545	2.297	1.8028	1.829	1.096	2.1936	2.5413
pipecolate	Amino Acid	Lysine Metabolism	1444	LC/MS Pos Early	1025	2200	130.086	4043-87-2	849	C00408	HMDB00070	3.6724	2.8978	2.7741	3.0991	2.2457	1.7731	1.4947	1.6184	1.1237	1.0448	1.437	1.1581	1.0773	1.1423	0.9553	2.1526	1.4889	1.6651	1.0069	0.3736	0.7129	0.7415	0.6423	1.0265	0.9858	0.6185	1.0225	3.156	5.3091	6.6712	0.8308	0.7045	1.2709	0.711	0.5114	1.0054	4.8135	1.4618
proline	Amino Acid	Urea cycle; Arginine and Proline Metabolism	1898	LC/MS Neg	480	778	114.056	147-85-3	145742	C00148	HMDB00162	1.0465	1.115	1.1594	1.0034	0.9492	0.9524	0.7925	0.8652	0.8779	0.9132	0.7368	0.8016	1.2559	1.1347	1.3538	0.8992	0.8743	0.9377	1.2052	1.3085	1.302	0.9085	0.928	0.9181	1.1026	0.8358	0.9883	1.1616	1.2662	1.4032	1.0396	1.3723	1.1128	1.2606	1.5067	1.2293	0.799	1.078
prolylglycine	Peptide	Dipeptide	40703	LC/MS Pos Early	100003674	2136	173.092	2578-57-6	7408076;6426709			3.8128	2.8488	2.6484	0.729	0.9859	1.0556	1.561	1.8011	2.0908	2.9641	1.9219	3.248	2.4921	3.4793	4.3753	1.4825	1.6042	1.6325	3.2099	2.7618	2.4798	2.048	2.0846	2.5938	3.7454	3.6947	4.5832	3.1666	4.9376	5.7775	3.6111	2.1009	2.9942	2.4883	1.8923	2.1035	2.8305	1.6721
propionylcarnitine	Lipid	Fatty Acid Metabolism (also BCAA Metabolism)	32452	LC/MS Pos Early	100001162	2590	218.139	17298-37-2	107738	C03017	HMDB00824	0.13	0.2255	0.482	6.3508	4.4175	7.3142	1.6613	0.5028	1.1863	1.6291	4.1207	1.419	2.9041	1.8186	3.0657	0.7677	0.4973	0.4208	1.5884	2.3853	0.6311	1.477	1.6086	1.0102	0.8238	0.3196	0.2038	0.3684	0.116	0.15	0.5703	1.0341	1.4486	0.4837	0.4946	0.6374	1.3609	0.8892
propionylglycine	Lipid	Fatty Acid Metabolism (also BCAA Metabolism)	31932	LC/MS Polar	100001150	1502.5	130.051	21709-90-0	98681		HMDB00783	0.191	0.197	0.8022	2.7196	0.8256	0.7409	3.3652	0.7343	0.9594	1.2772	3.2386	0.65	2.7186	0.5146	0.7331	1.6062	0.7863	0.8096	1.0206	1.6506	0.3686	1.0885	1.0152	0.7888	2.0664	2.0029	1.0959	0.8122	0.228	0.5612	0.3395	0.613	1.0033	0.5392	0.912	0.6325	1.2036	0.9209
pseudouridine	Nucleotide	Pyrimidine Metabolism, Uracil containing	33442	LC/MS Neg	821	1100	243.062	1445-07-4	15047	C02067	HMDB00767	1.5171	1.4023	1.235	0.9616	1.2567	1.2055	1.0367	1.2548	1.3844	1.192	1.0788	1.3078	1.4081	1.1574	1.2006	1.1033	1.1242	1.3615	1.1206	0.9895	1.4366	1.303	1.1664	1.3243	1.1223	1.0158	0.9021	1.1664	1.3286	1.1502	1.1693	1.2915	1.5361	1.1536	1.1996	1.2216	1.2449	1.3438
pterin	Cofactors and Vitamins	Pterin Metabolism	43023	LC/MS Neg	100004216	1370	162.042	22363-60-4	73000	C00715	HMDB00802	0.7088	0.6773	0.7754	0.9204	0.7575	0.7168	0.9423	0.8279	0.9852	2.1855	2.2725	2.353	0.6195	0.5301	0.56	0.4583	0.4296	0.4733	0.9884	0.8394	0.8418	0.5801	0.5545	0.7235	0.733	0.5506	0.6363	1.1886	1.2435	0.9107	0.4913	0.6804	0.611	1.4209	1.2321	1.2251	0.5573	0.7268
putrescine	Amino Acid	Polyamine Metabolism	1408	LC/MS Pos Early	49	3027	89.1073	110-60-1	1045	C00134	HMDB01414	0.7319	0.4402	0.8797	0.7336	0.7699	0.6456	0.6705	0.5821	0.5035	0.4271	0.4818	0.674	0.231	0.3662	0.3131	0.4334	0.4028	0.2356	0.8483	1.0359	0.8837	0.5622	0.5113	0.4666	0.6345	0.6014	0.4748	0.6284	0.398	0.3675	0.4974	0.637	0.4957	0.51	0.4846	0.6789	0.6988	0.3884
pyridoxal	Cofactors and Vitamins	Vitamin B6 Metabolism	1651	LC/MS Pos Early	491	2343	168.066	65-22-5	1050	C00250	HMDB01545	0.649	1.0376	1.1685	1.0484	0.5918	0.8042	0.9382	0.81	1.023	0.6932	0.6532	0.9117	0.388	0.5371	0.5404	0.9837	0.7743	0.8063	0.6204	0.5299	0.7974	0.7809	0.6499	0.7839	0.7282	0.4198	0.8081	0.6938	0.831	0.7459	0.7445	0.6675	1.0918	0.5945	0.199	0.8918	1.1474	0.9098
pyridoxamine	Cofactors and Vitamins	Vitamin B6 Metabolism	2150	LC/MS Pos Early	568	2975	169.097	58052-48-5	1052	C00534	HMDB01431	1.1639	1.017	1.4906	1.318	0.9655	0.8318	1.4592	1.0333	1.2068	1.1688	1.054	1.4234	0.8505	0.9493	1.0968	1.3261	1.0335	1.1872	0.7734	0.8226	0.9158	1.0334	1.0478	1.2047	0.777	1.8281	1.7385	0.4643	1.5225	1.4138	0.7659	0.6618	1.2637	1.2651	0.8067	1.3423	1.3008	1.038
pyridoxate	Cofactors and Vitamins	Vitamin B6 Metabolism	31555	LC/MS Neg	100001121	2185	182.046	82-82-6	6723	C00847	HMDB00017	1.2375	0.9243	1.0754	0.8345	1.1683	1.2267	1.0558	1.3085	1.4997	0.7667	0.8243	1.1125	1.0011	0.9062	1.0959	0.9847	0.9688	0.8776	1.2166	1.3439	1.4016	1.0685	1.281	0.9926	0.9078	1.2311	1.2915	0.941	1.0937	1.1852	0.909	1.3812	0.9818	1.0019	1.3975	1.1116	1.0717	1.2818
pyroglutamine*	Amino Acid	Glutamate Metabolism	46225	LC/MS Pos Early	100001540	1900	129.066	2353-44-8	134508			3.6005	4.5305	3.7671	1.9469	1.4233	0.9743	0.9877	0.1481	0.8672	1.6127	1.6508	0.9957	0.9093	1.2921	1.2496	0.6481	0.1481	0.6211	0.8841	0.7857	0.1481	0.1481	1.7036	2.0024	0.1481	0.8347	1.4893	0.474	0.5642	0.8395	0.6398	0.7746	0.6901	0.8053	0.4923	1.0022	1.353	0.7781
pyruvate	Carbohydrate	Glycolysis, Gluconeogenesis, and Pyruvate Metabolism	22250	LC/MS Polar	823	2650	175.025	127-17-3	1060	C00022	HMDB00243	3.5033	0.6479	0.0141	0.8895	3.5122	9.5624	1.1862	1.5991	0.8779	2.3222	2.0718	1.8114	1.5042	2.0967	0.8814	0.5402	6.5282	1.0645	5.937	11.308	6.5797	1.8547	1.7833	2.1377	0.1241	0.0276	0.2291	0.3786	0.5731	0.6167	3.0925	9.917	0.173	1.5893	7.7985	0.9574	0.0959	0.5956
quinate	Xenobiotics	Food Component/Plant	18335	LC/MS Polar	100000442	2432.9	191.056	77-95-2	6508	C00296	HMDB03072	0.632	0.5711	1.0458	2.7807	1.2596	0.809	1.7716	1.2986	0.9419	1.3998	2.3673	0.6304	2.007	1.3165	1.2183	1.7148	0.8231	0.8636	1.4256	1.9404	0.5901	1.635	1.644	1.0826	1.6822	1.4103	1.0027	0.9233	0.4157	0.7666	0.4393	0.7055	0.9779	0.7302	0.9165	0.8374	1.7597	1.3872
ribitol	Carbohydrate	Pentose Metabolism	15772	LC/MS Polar	100000406	1789.6	151.061	488-81-3	6912	C00474	HMDB00508	2.0194	1.6213	3.4298	1.3906	0.9056	0.6062	2.5527	1.9076	1.4669	1.0091	1.1348	1.1165	3.1325	1.2235	1.8931	1.7157	0.9531	1.2353	1.4378	1.2438	0.7945	0.7902	1.5353	1.1884	3.7034	7.6892	5.1395	2.3337	3.2383	4.4092	0.9679	1.0052	2.3655	1.4395	1.5079	2.6247	1.9196	2.0871
riboflavin (Vitamin B2)	Cofactors and Vitamins	Riboflavin Metabolism	1827	LC/MS Pos Early	500	2292	377.146	83-88-5	493570	C00255	HMDB00244	0.6164	0.7489	0.4918	2.0643	1.845	2.2372	2.7169	1.4275	2.0758	0.5857	0.5637	0.7202	1.2091	1.6586	2.8678	0.3928	0.4611	0.802	0.994	0.6756	1.0017	0.5478	0.5186	1.0282	0.2093	0.4233	0.7369	0.2303	0.6689	0.7669	0.6808	0.2761	0.6052	0.9488	0.412	0.9544	0.9888	0.6874
ribose	Carbohydrate	Pentose Metabolism	1471	LC/MS Polar	914	1508.2	195.051	50-69-1	5779	C00121	HMDB00283	1.8646	1.3981	1.3249	1.103	0.6895	0.6777	0.9806	1.0393	0.7274	0.7903	0.9756	0.9547	1.2179	0.8605	0.9997	0.9444	0.9269	0.9925	1.2064	0.9941	0.9055	1.3715	1.9076	1.5735	3.2411	5.4804	4.7327	1.8583	2.4579	4.4385	0.8487	1.1442	2.5337	0.9112	1.2987	2.9943	2.6602	2.5315
ribose 1-phosphate	Carbohydrate	Pentose Phosphate Pathway	1763	LC/MS Polar	219	4025	229.012	50-99-7;58459-37-3	439236	C00620	HMDB01489	0.6207	0.364	0.2959	0.9707	0.6173	0.6345	0.1321	0.3402	0.5125	0.1321	0.4841	0.6132	0.1321	0.1321	0.2807	0.1321	0.369	0.2424	0.1321	0.3108	0.2859	0.1321	0.2938	0.2674	0.1321	0.2041	0.2459	0.2656	0.1321	0.2819	0.5874	0.9841	0.848	0.1321	0.2559	0.3661	0.1321	0.1321
ribose 5-phosphate	Carbohydrate	Pentose Phosphate Pathway	561	LC/MS Polar	19	4193	229.012	18265-46-8;108321-05-7		C00117	HMDB01548	1.4797	1.624	0.6979	0.7385	0.496	0.5671	1.1281	0.603	1.657	2.0855	1.8907	1	0.3699	0.7386	1.0267	1.5262	1.166	0.8582	1.2651	1.4146	0.9413	1.5433	1.164	1.8795	0.4952	0.287	0.7485	1.0491	0.9251	0.3947	1.8833	1.65	1.5096	0.5366	0.5905	0.4812	1.714	1.5668
ribulose/xylulose	Carbohydrate	Pentose Metabolism	54671	LC/MS Polar	100006122	1400	195.051					1.381	1.2267	1.3214	1.174	1.7187	1.4366	1.1015	1.0498	1.2332	1.1882	1.9147	1.1648	1.7031	1.0733	1.0786	0.9576	0.8758	0.6377	1.0669	1.6933	1.0141	1.0735	1.0826	0.9848	1.2549	1.4748	1.0972	1.0129	0.9034	1.1026	0.9009	1.4869	0.9193	0.5821	1.1975	0.8965	0.7895	1.1945
S-1-pyrroline-5-carboxylate	Amino Acid	Glutamate Metabolism	42370	LC/MS Pos Early	35	1528	114.055	2906-39-0	1196	C04322	HMDB01301	1.3426	1.1403	0.7636	0.8673	0.785	0.2297	1.9474	1.3922	1.241	1.0737	1.141	1.3825	0.2297	1.5744	2.9953	1.0887	0.4158	0.8807	0.8716	0.2297	0.7882	2.1251	1.1609	2.2039	0.6046	2.8273	2.7098	0.2297	1.3114	3.5778	1.3063	1.0159	1.3023	2.5689	1.3195	2.2472	1.1833	0.9136
saccharopine	Amino Acid	Lysine Metabolism	1495	LC/MS Pos Early	392	2530	277.139	997-68-2	160556	C00449	HMDB00279	0.2354	0.2354	1.0456	3.2798	0.2354	0.2354	0.2354	1.0455	0.9981	2.1513	1.6167	1.0482	1.6569	1.0598	1.5005	0.8345	0.2354	0.7826	2.1324	1.7712	0.2354	1.0848	0.2354	1.2499	0.2354	1.5279	1.3501	0.2354	0.2354	1.2723	0.2354	0.2354	0.4831	0.2354	0.5327	1	1.6112	1.069
S-adenosylhomocysteine (SAH)	Amino Acid	Methionine, Cysteine, SAM and Taurine Metabolism	42382	LC/MS Neg	197	1832.4	383.114	979-92-0	439155	C00021	HMDB00939	0.7408	0.5486	0.3693	1.3266	1.2307	1.4236	1.4435	0.8946	0.3693	0.6749	0.712	0.3693	0.724	0.9603	0.6302	0.3693	0.3693	0.3693	0.9519	1.1602	1.1722	0.7208	0.3693	0.3693	0.3693	0.3693	0.3693	0.3693	0.3693	0.3693	0.7559	1.0083	0.3693	0.9876	0.3693	0.3693	0.3693	0.8527
S-adenosylmethionine (SAM)	Amino Acid	Methionine, Cysteine, SAM and Taurine Metabolism	15915	LC/MS Pos Early	1263	3002	399.145	24346-00-7;86867-01-8;86867-0108	34755	C00019	HMDB01185	1.0837	0.9698	0.8975	0.8128	1.352	1.8315	0.8304	1.0148	1.0491	0.7303	0.6885	0.9025	0.6656	0.8886	0.8759	0.7199	1.1138	0.8302	1.3731	1.5305	1.906	0.8871	0.8561	0.9727	0.6938	0.7515	0.8259	0.8578	1.0654	0.8272	1.3009	1.3814	1.0022	1.8839	1.9159	2.1224	1.6613	1.8917
sarcosine	Amino Acid	Glycine, Serine and Threonine Metabolism	1516	LC/MS Pos Early	1023	1280	90.055	107-97-1	1088	C00213	HMDB00271	0.6594	0.3843	0.9703	0.7703	0.6619	0.5457	0.4954	0.5294	0.4754	1.8303	2.3782	2.6243	1	0.9797	1.1958	0.1806	0.0967	0.0967	0.3381	0.3491	0.2961	0.5869	0.3673	1.7593	1.8414	1.405	0.9438	1.7245	1.3218	1.6109	0.6932	0.7323	0.788	0.2558	0.2644	0.6072	0.7129	0.5629
sedoheptulose	Carbohydrate	Pentose Metabolism	53237	LC/MS Polar	100002619	2255	209.067	3019-74-7	5459879		HMDB03219	2.0911	2.1647	2.1589	0.9368	1.2215	1.2519	1.8657	1.6426	1.9232	1.2352	1.1988	0.8995	0.9181	1.0964	1.0048	1.5167	1.8358	1.6154	1.4296	1.8649	1.5171	1.4931	2.0039	1.6834	1.8451	1.9536	1.9293	1.4077	1.4103	1.7459	1.8272	2.2003	1.8295	1.3087	1.4989	1.0813	1.5308	1.5662
sedoheptulose-7-phosphate	Carbohydrate	Pentose Phosphate Pathway	35649	LC/MS Neg	100001628	599.6	289.033	2646-35-7	616	C05382	HMDB01068	0.9738	1.431	1.0385	0.7907	0.8608	1.1892	1.2582	0.8954	1.44	1.0859	1.0941	0.8356	0.4631	0.6815	0.5231	1.0995	1.1727	1.2338	0.9654	1.3244	1.411	1.2365	1.035	1.1626	0.5747	0.31	0.5763	0.7621	0.6254	0.5083	1.0696	1.619	1.1413	0.6674	0.3793	0.4681	1.1794	1.453
sepiapterin	Cofactors and Vitamins	Pterin Metabolism	48139	LC/MS Neg	100005969	2162	236.079	17094-01-8	65253	C00835	HMDB00238	0.8063	0.6879	0.6483	0.7918	0.7814	0.7713	0.6443	0.5348	0.6337	0.6685	0.6386	0.6839	0.7483	0.7507	0.7962	0.8455	0.7875	0.8125	2.4949	1.7274	1.9401	0.8723	0.8321	0.7083	0.5785	0.4752	0.5545	0.6716	0.6189	0.5584	0.6545	0.7211	0.6147	0.5144	0.5546	0.5627	0.833	0.8743
serine	Amino Acid	Glycine, Serine and Threonine Metabolism	1648	LC/MS Pos Early	503	1239	106.05	56-45-1	5951	C00065	HMDB00187	1.9279	1.3815	1.5603	1.0886	1.1261	1.0518	1.4748	1.6447	1.4305	1.9903	1.534	1.8772	1.8239	2.2112	2.602	0.9875	1.2137	1.1863	1.7551	1.4374	1.4106	1.2717	1.4305	1.5676	1.8474	2.0529	1.8283	1.9733	2.3317	2.6871	2.1957	1.6334	1.9649	1.5879	1.6242	1.6804	1.5771	1.3038
spermidine	Amino Acid	Polyamine Metabolism	485	LC/MS Pos Late	50	700	146.165	124-20-9	1102	C00315	HMDB01257	1.1678	0.7644	0.8205	0.8553	0.928	1.086	0.9621	0.9118	0.8974	0.7423	0.6431	0.8715	0.6463	0.7434	0.7577	0.8957	0.9706	0.781	1.0397	1.0274	1.1242	0.9711	0.8135	1.2542	0.6702	0.7183	0.7799	0.5985	0.5906	0.6918	0.997	1.1184	0.8919	0.8344	0.7661	0.539	0.8508	0.778
sphinganine	Lipid	Sphingolipid Metabolism	17769	LC/MS Pos Late	313	1413	302.305	3102-56-5	3126	C00836	HMDB00269	1.7773	0.7449	2.8927	4.1304	3.3447	1.1559	3.2106	1.2647	1.4622	1.247	2.5422	1.4093	4.2644	1.0405	3.3601	2.5322	1.2503	1.1003	1.6931	1.5219	0.4443	2.1969	2.3096	1.8354	3.5095	3.7759	1.8984	3.5567	1.7196	2.2017	0.8667	0.4936	1.4119	1.436	1.8996	1.7684	3.0845	1.5453
stachydrine	Xenobiotics	Food Component/Plant	34384	LC/MS Pos Early	100001296	1440	144.102	4136-37-2	115244	C10172	HMDB04827	3.2138	3.9048	2.578	1.9597	2.3277	1.9241	1.2874	1.2145	1.2474	0.6969	0.8879	0.8501	0.6495	0.8583	1.3964	0.626	0.7318	1.4085	0.5552	0.2655	0.4149	0.6955	0.873	2.383	1.1893	1.1984	1.4833	1.2372	3.4328	5.089	1.8495	1.272	3.1204	1.5703	0.5948	3.8273	2.8525	2.0651
stearate (18:0)	Lipid	Long Chain Fatty Acid	1358	LC/MS Neg	439	5872	283.264	57-11-4	5281	C01530	HMDB00827	0.8864	0.8466	0.5731	1.0311	1.0575	1.4752	1.0995	1.3585	1.383	1.0725	0.89	0.5877	1.0669	1.0051	0.3865	0.9347	1.011	1.0945	0.9317	1.2324	0.9949	1.1126	1.1929	1.0003	0.924	0.8062	0.8001	0.9641	0.9031	0.5162	1.0594	0.9071	1.0498	0.9741	0.8579	0.5077	1.044	1.0662
stearidonate (18:4n3)	Lipid	Polyunsaturated Fatty Acid (n3 and n6)	33969	LC/MS Neg	100001229	5395	275.202	111174-40-4	5312508	C16300	HMDB06547	1.4883	0.7817	0.8672	1.0901	1.2137	0.2389	0.4366	0.8741	0.2389	0.6835	0.9899	0.8615	1.0899	0.7489	0.2389	1.0249	0.8615	0.2389	1.0958	1.0533	1.0131	1.1556	0.7686	0.2389	1.515	1.2764	1.1247	0.7119	1	0.2389	0.7948	0.7812	0.8659	1.1031	0.837	0.6755	1.3968	1.6273
stearoylcarnitine	Lipid	Fatty Acid Metabolism(Acyl Carnitine)	34409	LC/MS Pos Late	100001391	1485	428.373	18822-91-8	6426855		HMDB00848	1.224	1.1299	1.2765	0.9846	1.3743	1.2432	0.8604	1.3576	0.8781	0.9069	0.7733	1.2493	0.9977	1.4985	0.8384	0.9596	0.9264	0.9426	1.1418	1.0743	1.1926	0.8794	0.7993	1.0006	0.7018	0.7785	1.0003	1.0139	1.0578	0.8833	1.3649	1.0746	1.0828	1.207	0.9207	1.0263	1.068	1.0454
succinate	Energy	TCA Cycle	1437	LC/MS Polar	252	3149	117.019	110-15-6	1110	C00042	HMDB00254	0.801	1.0765	1.0688	1.148	1.0604	0.9388	0.8219	0.8118	0.92	0.7971	1.106	1.0437	1.1465	1.1528	0.9619	0.8852	0.5397	0.8092	0.66	0.7286	0.9451	0.8652	0.8861	1.0379	1.071	0.7216	0.9967	0.8602	0.9072	0.8591	0.8749	0.9301	1.0839	1.2049	0.8314	1.0385	0.7978	0.9751
succinimide	Xenobiotics	Chemical	41888	LC/MS Polar	100003696	2155	116.035	123-56-8	11439	C07273		1.1762	0.9632	0.3645	1.0643	1.6228	1.4023	1.1666	1.596	1.1094	1.1072	0.8262	1.2899	0.6377	1.4839	1.2698	0.7279	0.9217	1.2739	1.0513	1.0028	1.1323	1.0434	0.9403	1.5174	0.8418	0.3526	1.41	0.9145	1.8328	1.6506	1.2248	0.7735	0.7835	1.3157	0.8156	1.0393	0.7904	0.5829
sucrose	Carbohydrate	Disaccharides and Oligosaccharides	1519	LC/MS Polar	935	3092	387.114	57-50-1	5988	C00089	HMDB00258	0.6459	0.665	0.906	1.7215	1.0932	0.8687	1.1841	0.9062	0.9915	2.0255	3.2333	1.3125	2.4637	1.2092	1.6335	2.2176	1.3627	1.2668	1.2918	1.5693	0.758	1.565	1.8187	1.2915	1.3395	1.4338	1.0702	1.3227	1.0438	1.3759	0.5189	0.6946	0.9566	0.8369	1.103	1.2605	1.2402	1.2682
sulfate*	Xenobiotics	Chemical	46960	LC/MS Neg	100002528	616	96.9601	14808-79-8	1118	C00059	HMDB01448	0.3823	0.3604	0.0465	1.9694	0.7602	0.0465	0.9137	0.865	0.0465	4.2142	8.4847	3.2425	2.0234	0.8091	0.0465	0.8953	0.0465	0.0465	1.0405	1.4227	0.0465	1.0658	0.9308	0.0465	1.3759	0.4895	0.0465	1.0582	0.2369	0.0465	0.0925	0.8206	0.0465	0.4321	0.6746	0.1958	1.2683	1.7196
taurine	Amino Acid	Methionine, Cysteine, SAM and Taurine Metabolism	2125	LC/MS Neg	512	690	124.007	107-35-7	1123	C00245	HMDB00251	0.803	0.689	0.8324	0.917	0.826	0.8745	0.659	0.6204	0.5724	0.6969	0.743	0.8132	0.9868	0.9139	0.939	0.8094	0.7379	0.7505	1.0925	1.0844	1.016	0.8134	0.7576	0.7017	0.694	0.607	0.7261	0.0273	0.0354	0.0389	0.7842	0.9025	0.7191	0.8553	0.9111	0.7817	0.9196	1.0772
tetradecanedioate	Lipid	Fatty Acid, Dicarboxylate	35669	LC/MS Neg	100001613	4000	257.176	821-38-5	13185		HMDB00872	3.3895	2.0738	2.2528	1.0064	0.9876	0.8822	1.1715	0.7149	1.028	1.6832	1.8641	1.4847	2.1305	1.7971	2.1355	1.2864	1.2077	1.2679	1.2354	1.313	0.8949	1.1796	1.4525	0.7006	3.3479	2.8097	2.9953	1.4376	1.2627	1.6253	0.7379	0.9123	0.6692	0.5836	0.9226	1.121	1.3584	1.3346
thiamin (Vitamin B1)	Cofactors and Vitamins	Thiamine Metabolism	5341	LC/MS Pos Early	873	3050	265.112	59-43-8	1130	C00378	HMDB00235	1.851	1.8591	1.7988	1.7863	1.5264	1.5112	1.3361	1.0124	1.1684	1.0792	0.9757	1.2195	1.2268	1.3468	1.5613	0.8998	0.7957	0.9978	1.0912	1.0648	1.1547	1.1338	1.022	1.5603	1.3503	1.2341	1.4516	1.3083	1.5326	1.8741	0.9948	0.5822	1.1909	1.426	0.9414	1.416	0.9885	0.647
thiamin monophosphate	Cofactors and Vitamins	Thiamine Metabolism	15798	LC/MS Neg	523	1448	343.064	532-40-1	3382778	C01081	HMDB02666	0.8885	1.0953	1.2065	0.8711	0.8321	0.916	0.9822	0.9482	0.9995	1.0517	1.0665	1.0782	0.9535	0.7815	0.8456	0.9709	0.661	0.7209	0.8454	0.8135	0.7472	1.0815	0.9512	0.9393	1.1089	0.7612	0.9493	1.4614	1.3	1.2681	0.807	1.0116	0.8482	0.917	0.7907	0.9074	0.7836	1.2237
thioproline	Amino Acid	Tryptophan Metabolism	53231	LC/MS Polar	100009232	1380	132.012	34592-47-4	93176;6973609			0.2109	0.4749	0.4453	0.2746	0.1069	0.2224	0.0883	0.1234	0.115	0.0526	0.0526	0.1257	0.0805	0.109	0.0929	0.1877	0.227	0.2405	0.1732	0.2384	0.3577	0.0999	0.2902	0.0772	0.0526	0.0622	0.1686	0.0526	0.2151	0.0984	0.1677	0.3994	0.3443	0.0738	0.1316	0.2322	0.3656	0.7255
threonate	Cofactors and Vitamins	Ascorbate and Aldarate Metabolism	27738	LC/MS Polar	100001022	2384	135.03	70753-61-6	151152	C01620	HMDB00943	1.0019	1.513	1.9979	1.4586	1.1827	0.7773	1.234	0.8807	0.8128	0.9889	1.3396	0.59	1.2045	0.8243	1.2059	1.4254	0.5005	0.6709	1.2539	1.3573	0.8394	1.0995	0.6491	0.8161	0.9246	0.6205	1.2857	0.7325	0.7984	0.5646	0.8041	0.4198	0.798	0.5994	0.5385	0.6604	1.7136	0.6658
threonine	Amino Acid	Glycine, Serine and Threonine Metabolism	1284	LC/MS Pos Early	564	1514	120.066	72-19-5	6288	C00188	HMDB00167	2.3584	1.5673	1.8298	0.8339	1.041	1.0756	1.3566	1.4183	1.46	1.5575	1.4595	2.0609	1.8534	1.9406	2.8553	1.0719	1.0011	1.2124	1.4366	1.0933	1.2633	1.527	1.2433	1.9452	2.0452	1.8205	1.8618	1.5913	2.3776	3.1498	2.1259	1.4012	2.2136	1.4064	1.3493	1.8289	1.7058	1.3691
threonylphenylalanine	Peptide	Dipeptide	31530	LC/MS Pos Early	100001125	3077	267.134	16875-27-7	4099799;4099798			1.568	2.1203	4.3615	0.1941	0.7053	0.6689	0.9512	0.3681	2.0601	1.231	1.7284	2.0682	0.1941	1.8412	3.4577	1.046	0.9125	2.2351	0.9711	0.9065	1.5015	1.0966	1.4748	2.8153	3.1984	1.8115	2.5565	1.2109	1.4712	5.2443	0.8877	0.883	1.5283	1.698	1.1594	2.1141	0.6791	0.9413
thymidine	Nucleotide	Pyrimidine Metabolism, Thymine containing	2183	LC/MS Neg	872	1963.7	241.083	50-89-5	5789	C00214	HMDB00273	1.3773	1.3968	1.4807	1.248	1.5963	1.879	2.1505	3.0223	2.2412	1.5104	1.6222	1.9285	2.4671	1.9593	1.2341	1.4738	1.3934	1.6481	1.697	1.8983	2.3096	1.6046	1.5187	2.3786	1.6336	1.2838	1.5202	2.512	2.1914	1.6121	0.9911	1.6584	1.9536	1.8951	1.8722	2.3572	2.0065	2.2038
thymine	Nucleotide	Pyrimidine Metabolism, Thymine containing	604	LC/MS Neg	882	1654	125.036	65-71-4	1135	C00178	HMDB00262	0.9894	0.5562	2.353	0.5087	1.1129	0.4604	0.2801	1.0106	0.7358	0.8323	0.2801	0.9545	1.9975	1.2862	2.6872	0.2801	0.2801	1.1075	0.2801	0.2801	1.5445	0.5155	0.2801	0.8497	1.3998	0.8012	2.264	1.0527	1.7354	1.4154	1.1283	0.4581	1.5248	0.7332	0.2801	0.3774	1.2954	0.6213
trans-4-hydroxyproline	Amino Acid	Urea cycle; Arginine and Proline Metabolism	32306	LC/MS Pos Early	1001	1064	132.066	51-35-4	5810	C01157	HMDB00725	1.2878	1.0702	0.2187	1.5388	0.8722	1.3998	1.4281	0.9885	1.5023	0.8288	0.7808	1.1033	0.6573	1.0177	1.1662	0.2187	0.2187	0.6499	0.794	0.5053	1.0035	0.2187	0.3514	2.0508	0.3625	0.2187	1.1189	0.2187	1.1043	1.2494	1.0626	0.8978	1.1605	1.3816	0.6456	1.5691	1.3802	1.3395
tricarballylate	Energy	TCA Cycle	15729	LC/MS Polar	2053	4200	175.025	99-14-9	14925	C19806	HMDB31193	3.1785	3.4919	3.1443	7.4817	3.7474	1.3628	1.2355	1.1879	0.8909	0.4953	0.7407	0.3729	0.6208	0.4186	1.0692	2.7376	0.6848	2.3695	0.7551	0.6854	0.439	2.4378	3.8037	3.5179	3.0302	8.8363	6.8768	1.5377	3.7283	7.6353	0.2316	0.9942	5.3869	0.7872	0.5295	4.1915	11.6558	8.6431
trigonelline (N'-methylnicotinate)	Cofactors and Vitamins	Nicotinate and Nicotinamide Metabolism	32401	LC/MS Pos Early	100001092	1388	138.055	535-83-1	5570	C01004	HMDB00875	0.8529	0.8165	0.778	2.2181	1.3713	1.1607	1.5462	1.0591	1.259	1.3299	2.0262	0.8115	1.147	1.144	0.9984	1.0886	0.8118	0.8181	1.1993	1.0308	0.6964	1.359	0.616	1.4326	1.0825	0.8343	1.0358	0.4918	0.4507	0.8787	0.9673	1.0368	1.3772	1.1684	0.8423	1.1127	1.5645	1.1902
tryptophan	Amino Acid	Tryptophan Metabolism	54	LC/MS Pos Early	565	2986	205.097	73-22-3	6305	C00078	HMDB00929	1.5247	1.2032	1.3764	0.9232	0.873	0.8218	1.8434	1.558	1.4062	1.135	0.9188	1.1723	1.7381	1.6907	2.2212	0.9527	0.8857	0.8727	1.3971	1.354	1.348	1.1477	1.1291	1.2333	1.653	1.677	1.8346	0.6356	1.6209	2.1684	1.3	1.0224	1.4775	1.2576	1.18	1.4122	1.1156	1.004
tyrosine	Amino Acid	Phenylalanine and Tyrosine Metabolism	1299	LC/MS Pos Early	815	2430	182.081	60-18-4	6057	C00082	HMDB00158	0.8429	0.7471	0.7025	0.2648	0.305	0.593	0.5159	0.4117	0.9467	0.5208	0.2427	0.3952	0.4824	0.3087	0.7325	0.546	0.6591	0.6438	1.7297	1.2233	2.0924	0.8505	0.6578	0.774	0.4552	0.2263	0.7327	1.0846	1.2253	1.5594	0.4456	0.9379	1.6453	0.2852	0.1149	0.8989	0.3968	0.4323
tyrosylglycine	Peptide	Dipeptide	41375	LC/MS Pos Early	100003598	2439	239.103	673-05-5	259323			1.9207	2.4823	3.6714	0.427	0.7068	0.7852	1.487	1.036	2.0381	0.9076	0.7955	1.083	0.2799	1.5279	1.1578	1.5888	1.3685	1.8544	1.8997	0.1692	2.4955	1.8573	1.6505	2.5298	0.1692	0.5631	1.629	0.9695	1.4693	2.2159	1.7287	2.2762	1.9761	1.8102	0.1692	1.6507	1.1296	1.7354
UDP-N-acetylglucosamine	Carbohydrate	Nucleotide Sugar	35162	LC/MS Polar	1249	3708.7	606.074	91183-98-1	445675	C00043	HMDB00290	1.0012	0.913	0.7434	1.2239	1.2925	1.28	0.7954	0.91	0.8295	1.2498	1.1263	1.0874	1.0637	0.9943	0.8461	1.1147	1.2576	0.9891	0.9186	1.0255	1.0074	0.9754	0.8474	1.0758	1.1398	1.1856	1.1009	0.6993	0.9411	0.7173	1.2307	1.318	1.0125	0.6988	0.7485	0.6769	0.9528	1.2017
undecanedioate	Lipid	Fatty Acid, Dicarboxylate	42395	LC/MS Neg	100001617	2440	215.129	1852-04-6	15816		HMDB00888	0.956	1.0318	1.3413	1.2638	1.2459	0.9877	0.401	0.705	0.8261	1.6479	0.8862	0.7115	1.9268	0.915	0.959	0.7215	0.9932	0.8975	0.4985	1.1786	0.9399	0.677	1.0764	0.7446	0.7425	1.2952	1.1911	0.3996	0.9765	1.1171	0.7074	1.2093	1.0158	0.3996	0.3996	0.7501	1.2326	0.8803
uracil	Nucleotide	Pyrimidine Metabolism, Uracil containing	605	LC/MS Polar	825	1089.7	111.02	66-22-8	1174	C00106	HMDB00300	1.2864	0.8614	1.0415	0.6758	0.8009	0.8109	0.5879	0.8492	0.6312	0.7166	0.7189	0.724	0.7629	0.667	0.7172	0.6727	0.8012	0.7402	0.6554	0.8752	0.7606	0.7111	1.0407	0.9686	1.2016	1.7077	1.6312	0.9111	1.0587	1.6934	1.1711	1.2152	1.2271	0.6647	0.8665	1.0943	0.9436	1.2186
urate	Nucleotide	Purine Metabolism, (Hypo)Xanthine/Inosine containing	1604	LC/MS Neg	1134	757.1	167.021	69-93-2;120K5305	1175	C00366	HMDB00289	0.6996	0.6913	0.8004	1.1216	0.8618	0.8249	0.6393	0.5771	0.6349	0.5276	0.5798	0.5995	0.8773	0.7954	0.8635	0.5045	0.356	0.4254	0.8563	0.9042	0.8581	0.8486	0.7281	0.6625	0.6097	0.5244	0.632	1.0088	1.0487	1.0695	0.7171	0.8265	0.781	0.8441	0.933	0.9666	0.5655	0.7786
uridine	Nucleotide	Pyrimidine Metabolism, Uracil containing	606	LC/MS Neg	535	1457.6	243.062	58-96-8	6029	C00299	HMDB00296	1.3586	1.4237	0.8364	1.075	1.3077	1.4357	1.4857	1.496	1.498	1.3767	1.4755	1.3938	1.5391	1.358	1.24	1.3403	1.3938	0.7289	1.7081	1.7433	1.5457	1.565	1.3575	1.3931	1.4195	1.1683	0.7769	1.2998	1.2804	1.0375	1.727	2.0576	1.1726	1.4	1.4094	1.314	1.3246	1.545
uridine 3'-monophosphate (3'-UMP)	Nucleotide	Pyrimidine Metabolism, Uracil containing	39764	LC/MS Polar	106	3800	323.029	35170-0-7;35170-03-7	101543	C01368		2.1459	1.5639	1.3144	1.2708	1.3471	1.4556	0.9686	1.1145	1.1252	1.4411	1.4433	1.123	1.4709	1.3758	1.4391	1.83	2.2272	1.5252	1.2981	1.5263	1.134	1.5601	1.5314	1.3907	1.3403	1.6614	1.1522	1.4275	1.2826	1.3143	1.9233	2.1348	1.4257	1.0331	1.3244	1.085	1.2382	1.5282
uridine-2',3'-cyclic monophosphate	Nucleotide	Pyrimidine Metabolism, Uracil containing	37137	LC/MS Neg	75	1090	305.018	40632-52-8	439715	C02355	HMDB11640	1.5763	2.1395	1.7175	1.309	1.5987	1.841	1.2744	1.4516	1.7204	1.572	2.098	1.9213	1.6827	1.3883	1.3289	2.1748	1.8727	1.6077	1.55	1.7395	1.8392	2.0292	2.126	2.0824	1.7906	1.4533	1.3081	1.5312	1.3732	1.4878	1.5114	2.7689	1.6595	1.6479	1.7259	2.1513	1.2574	2.3106
valine	Amino Acid	Leucine, Isoleucine and Valine Metabolism	1649	LC/MS Pos Early	566	2479	118.086	72-18-4	6287	C00183	HMDB00883	2.7293	2.0742	2.0841	0.9268	1.2301	1.1569	1.715	1.6763	1.7975	1.9374	1.163	1.4548	2.0939	2.3955	3.049	1.5769	1.5736	1.5341	2.2559	1.7164	1.6614	1.9263	1.6005	2.0597	3.0579	2.5483	2.4324	2.7131	3.4909	3.8566	2.5685	1.4817	2.2452	1.9047	1.8182	2.0511	1.8282	1.4167
valylglutamine	Peptide	Dipeptide	42079	LC/MS Pos Early	100003640	2295	246.145	42854-54-6	5253209			0.6949	3.5849	4.9212	1.8137	4.3038	1.6236	3.443	1.687	2.8188	1.0807	3.2195	2.8013	2.0546	6.2422	3.9748	2.1683	0.9512	2.0117	1.0834	0.8586	2.078	2.2108	3.3902	4.4212	1.783	2.6861	2.0113	1.089	2.177	5.9702	1.3717	1.3638	1.7719	4.3115	0.9006	2.878	0.9042	1.053
valylglycine	Peptide	Dipeptide	40475	LC/MS Pos Early	100003641	2444	175.108	686-43-1	136487		HMDB29127	1.7015	3.8881	5.1363	1.2108	1.6064	1.5283	1.9385	1.5613	2.2289	1.4522	1.7997	2.4255	1.9964	3.18	3.0393	1.9823	1.7568	2.1181	1.9378	0.9783	2.0881	2.5675	2.2085	3.1606	1.3495	2.5104	2.9983	2.0437	2.6384	4.8909	1.9313	2.1065	2.8058	3.6355	0.9927	3.0652	1.4668	1.1573
valylleucinamide	Xenobiotics	Chemical	37460	LC/MS Pos Early	100002062	2950	230.186		4693887			1.8988	1.809	1.044	0.9867	1.1154	2.2882	1.4049	1.3626	2.2348	1.7288	1.7595	2.2529	1.6754	3.0415	4.0657	0.6864	1.1124	0.8576	1.8127	1.7377	1.8203	2.0588	1.8848	2.1007	1.1689	1.5174	1.7635	1.9902	3.4536	2.8109	2.0315	1.8761	3.3844	1.4218	1.7152	1.7249	1.915	1.51
valylleucine	Peptide	Dipeptide	39994	LC/MS Pos Early	100003210	3138	231.17	22906-55-4	352039		HMDB29131	0.8727	4.4251	6.416	2.6399	5.8091	2.4555	4.9468	2.6473	5.0488	1.4844	6.0442	5.2006	2.6543	8.8686	6.1882	3.0973	1.3773	3.4833	1.5789	1.1517	3.0217	3.1075	5.4149	7.4275	2.5285	3.7743	3.05	1.6338	2.2117	7.7527	1.7491	2.4312	2.4214	5.3053	1.1492	4.026	1.6883	1.6035
xanthine	Nucleotide	Purine Metabolism, (Hypo)Xanthine/Inosine containing	3147	LC/MS Polar	1004	2023	151.026	69-89-6	1188	C00385	HMDB00292	1.9016	1.1949	1.5934	0.8058	0.5101	0.4816	0.6583	0.8264	0.4228	0.4437	0.4575	0.699	0.9982	0.3862	0.7555	0.7188	0.6305	0.6326	1.1205	0.9889	0.5587	1.1697	1.8989	1.089	1.7949	2.4839	2.2752	1.1241	1.5656	2.2371	0.7041	0.9332	1.6015	0.7187	1.089	1.7104	1.305	1.1873
xanthopterin	Cofactors and Vitamins	Folate Metabolism	54728	LC/MS Neg	100006338	866	178.037		8397			0.9113	1.658	5.1905	1.6501	5.8021	0.7211	2.1139	6.048	1.4191	0.6152	0.5594	1.5064	0.4069	1.7448	1.7778	0.1309	0.3419	0.679	0.8936	1.0008	0.8688	0.4367	0.5129	0.4812	0.9221	0.9997	3.3613	0.5939	3.0735	1.5628	0.794	0.2013	0.6863	1.9584	0.6158	0.768	1.7119	0.941
xanthosine	Nucleotide	Purine Metabolism, (Hypo)Xanthine/Inosine containing	15136	LC/MS Neg	100000299	1075.3	283.068	146-80-5	64959	C01762	HMDB00299	2.3214	1.0848	3.8178	0.8606	0.8184	1.4233	1.9792	0.6393	2.3635	0.7081	0.3717	1.8983	0.7939	0.8587	1.7264	0.8692	0.6573	4.6167	1.059	0.3597	2.5915	0.8282	0.3663	1.4589	0.9712	0.47	2.4391	1.0502	1.9358	0.8745	0.823	0.4237	2.6915	1.6373	0.563	0.8349	1.4354	0.3006
xanthurenate	Amino Acid	Tryptophan Metabolism	15679	LC/MS Neg	100000015	1476	204.03	59-007	5699	C02470	HMDB00881	1.3343	1.2303	1.1283	0.8924	0.9256	0.8905	1.1728	1.0137	1.0762	1.4861	1.3357	1.3194	0.2692	0.2657	0.2341	1.7995	1.6523	1.5555	1.2614	1.2339	1.2042	1.3832	1.2901	1.2814	0.8645	0.7827	0.8446	0.0227	0.0241	0.0165	0.6287	0.7406	0.6439	0.9063	0.9733	0.9852	1.146	1.2125
[truncated: 202 more columns]
