# Supplementary material for: Systems genetics of the Drosophila metabolome
Source: Genome Res. 2020 Mar;30(3):392–405. doi: 10.1101/gr.243030.118 (PMC7111526; doi:10.1101/gr.243030.118)
Supplement: Supplemental Material [file supp_gr.243030.118_Supplemental_Table_S2.xlsx.xlsx]

## Sheet: ANOVAs
Supplemental Table S2. Full model ANOVAs. Metabolites that are not genetically variable are highlighted in gray.
Metabolite	Source	F Value	P-value	FDR
1-(1-enyl-palmitoyl)-2-linoleoyl-GPC (P-16:0/18:2)*	Line	1	0.5	0.51233
1-(1-enyl-palmitoyl)-2-linoleoyl-GPC (P-16:0/18:2)*	Sex	1504.1	<.0001	1.0897e-31
1-(1-enyl-palmitoyl)-2-linoleoyl-GPC (P-16:0/18:2)*	Sex*Line	71.97	<.0001	2.7213e-80
1-(1-enyl-palmitoyl)-2-linoleoyl-GPE (P-16:0/18:2)*	Line	1.5	0.1037	0.117408
1-(1-enyl-palmitoyl)-2-linoleoyl-GPE (P-16:0/18:2)*	Sex	1943.5	<.0001	1.1434e-33
1-(1-enyl-palmitoyl)-2-linoleoyl-GPE (P-16:0/18:2)*	Sex*Line	1.36	0.095	0.213064
1-(1-enyl-palmitoyl)-2-oleoyl-GPC (P-16:0/18:1)*	Line	1.17	0.3111	0.33471
1-(1-enyl-palmitoyl)-2-oleoyl-GPC (P-16:0/18:1)*	Sex	584.11	<.0001	2.4599e-24
1-(1-enyl-palmitoyl)-2-oleoyl-GPC (P-16:0/18:1)*	Sex*Line	2.34	0.0001	0.00054082
1-(1-enyl-palmitoyl)-2-oleoyl-GPE (P-16:0/18:1)*	Line	1.15	0.3368	0.358962
1-(1-enyl-palmitoyl)-2-oleoyl-GPE (P-16:0/18:1)*	Sex	1018.31	<.0001	1.227e-28
1-(1-enyl-palmitoyl)-2-oleoyl-GPE (P-16:0/18:1)*	Sex*Line	2.7	<.0001	4.342e-05
1-(1-enyl-palmitoyl)-2-palmitoleoyl-GPC (P-16:0/16:	Line	1	0.5	0.51233
1-(1-enyl-palmitoyl)-2-palmitoleoyl-GPC (P-16:0/16:	Sex	157.84	<.0001	7.2467e-15
1-(1-enyl-palmitoyl)-2-palmitoleoyl-GPC (P-16:0/16:	Sex*Line	8.61	<.0001	1.8414e-21
1-(1-enyl-palmitoyl)-GPE (P-16:0)*	Line	1.91	0.0235	0.0285389
1-(1-enyl-palmitoyl)-GPE (P-16:0)*	Sex	128.28	<.0001	1.5743e-13
1-(1-enyl-palmitoyl)-GPE (P-16:0)*	Sex*Line	1.82	0.0054	0.0168994
1-(1-enyl-stearoyl)-2-linoleoyl-GPE (P-18:0/18:2)*	Line	5.94	<.0001	3.64584e-07
1-(1-enyl-stearoyl)-2-linoleoyl-GPE (P-18:0/18:2)*	Sex	179.39	<.0001	1.0156e-15
1-(1-enyl-stearoyl)-2-linoleoyl-GPE (P-18:0/18:2)*	Sex*Line	1.78	0.0068	0.020948
1-(1-enyl-stearoyl)-2-oleoyl-GPE (P-18:0/18:1)	Line	3.39	0.0001	0.00022814
1-(1-enyl-stearoyl)-2-oleoyl-GPE (P-18:0/18:1)	Sex	45.06	<.0001	9.06887e-08
1-(1-enyl-stearoyl)-2-oleoyl-GPE (P-18:0/18:1)	Sex*Line	3.3	<.0001	6.35288e-07
1-(1-enyl-stearoyl)-GPE (P-18:0)*	Line	3.66	<.0001	0.0001087
1-(1-enyl-stearoyl)-GPE (P-18:0)*	Sex	124.1	<.0001	2.5232e-13
1-(1-enyl-stearoyl)-GPE (P-18:0)*	Sex*Line	3.05	<.0001	3.61934e-06
1,2-dilinoleoyl-galactosylglycerol (18:2/18:2)*	Line	2.1	0.0115	0.014752
1,2-dilinoleoyl-galactosylglycerol (18:2/18:2)*	Sex	660.04	<.0001	2.9659e-25
1,2-dilinoleoyl-galactosylglycerol (18:2/18:2)*	Sex*Line	1.66	0.0157	0.041917
1,2-dilinoleoyl-GPC (18:2/18:2)	Line	2.3	0.0053	0.00728536
1,2-dilinoleoyl-GPC (18:2/18:2)	Sex	1816.32	<.0001	3.6674e-33
1,2-dilinoleoyl-GPC (18:2/18:2)	Sex*Line	3.74	<.0001	2.52457e-08
1,2-dilinoleoyl-GPE (18:2/18:2)*	Line	1.65	0.06	0.0704471
1,2-dilinoleoyl-GPE (18:2/18:2)*	Sex	1906.96	<.0001	1.5458e-33
1,2-dilinoleoyl-GPE (18:2/18:2)*	Sex*Line	2.57	<.0001	0.00010318
1,2-dioleoyl-GPC (18:1/18:1)*	Line	2.46	0.003	0.00435301
1,2-dioleoyl-GPC (18:1/18:1)*	Sex	1955.94	<.0001	1.0616e-33
1,2-dioleoyl-GPC (18:1/18:1)*	Sex*Line	0.77	0.8329	1
1,2-dioleoyl-GPE (18:1/18:1)	Line	2.11	0.0109	0.0142642
1,2-dioleoyl-GPE (18:1/18:1)	Sex	2801.33	<.0001	2.5484e-36
1,2-dioleoyl-GPE (18:1/18:1)	Sex*Line	1.99	0.0016	0.005682
1,2-dipalmitoleoyl-GPC (16:1/16:1)*	Line	1.32	0.1955	0.217549
1,2-dipalmitoleoyl-GPC (16:1/16:1)*	Sex	862.17	<.0001	2.4989e-27
1,2-dipalmitoleoyl-GPC (16:1/16:1)*	Sex*Line	3.97	<.0001	5.14182e-09
1,2-dipalmitoyl-GPC (16:0/16:0)	Line	2.11	0.011	0.0142797
1,2-dipalmitoyl-GPC (16:0/16:0)	Sex	2873.09	<.0001	1.7229e-36
1,2-dipalmitoyl-GPC (16:0/16:0)	Sex*Line	3.27	<.0001	7.75534e-07
10-heptadecenoate (17:1n7)	Line	2.03	0.0147	0.0184969
10-heptadecenoate (17:1n7)	Sex	27.8	<.0001	8.22035e-06
10-heptadecenoate (17:1n7)	Sex*Line	0.86	0.7063	0.960785
10-nonadecenoate (19:1n9)	Line	2.55	0.0021	0.00316378
10-nonadecenoate (19:1n9)	Sex	2.31	0.1364	0.152996
10-nonadecenoate (19:1n9)	Sex*Line	0.87	0.6852	0.944702
12,13-DiHOME	Line	12.23	<.0001	1.6283e-11
12,13-DiHOME	Sex	6.9	0.0123	0.0151643
12,13-DiHOME	Sex*Line	0.82	0.7658	0.998103
13-HODE + 9-HODE	Line	3.6	<.0001	0.00012447
13-HODE + 9-HODE	Sex	104.28	<.0001	2.9962e-12
13-HODE + 9-HODE	Sex*Line	0.95	0.5604	0.84054
13-methylmyristate	Line	8.77	<.0001	2.20148e-09
13-methylmyristate	Sex	137.93	<.0001	5.4033e-14
13-methylmyristate	Sex*Line	1.01	0.4691	0.743273
15-methylpalmitate	Line	4.88	<.0001	4.25676e-06
15-methylpalmitate	Sex	35.71	<.0001	9.11286e-07
15-methylpalmitate	Sex*Line	0.72	0.8856	1
16-hydroxypalmitate	Line	3.66	<.0001	0.00010656
16-hydroxypalmitate	Sex	9.62	0.0036	0.00460995
16-hydroxypalmitate	Sex*Line	0.95	0.5667	0.841732
17-methylstearate	Line	5.01	<.0001	3.07947e-06
17-methylstearate	Sex	39.51	<.0001	3.45787e-07
17-methylstearate	Sex*Line	0.81	0.7736	0.998383
1-kestose	Line	6.19	<.0001	2.18801e-07
1-kestose	Sex	4.33	0.0441	0.0521996
1-kestose	Sex*Line	0.98	0.518	0.795503
1-linolenoyl-GPC (18:3)*	Line	1.52	0.0978	0.111566
1-linolenoyl-GPC (18:3)*	Sex	3448.07	<.0001	7.3234e-38
1-linolenoyl-GPC (18:3)*	Sex*Line	0.45	0.9978	1
1-linoleoyl-2-linolenoyl-galactosylglycerol (18:2/1	Line	2.04	0.0141	0.0178517
1-linoleoyl-2-linolenoyl-galactosylglycerol (18:2/1	Sex	534.62	<.0001	1.1544e-23
1-linoleoyl-2-linolenoyl-galactosylglycerol (18:2/1	Sex*Line	0.96	0.5444	0.819308
1-linoleoyl-2-linolenoyl-GPC (18:2/18:3)*	Line	1.92	0.0227	0.0276803
1-linoleoyl-2-linolenoyl-GPC (18:2/18:3)*	Sex	1229.3	<.0001	3.7283e-30
1-linoleoyl-2-linolenoyl-GPC (18:2/18:3)*	Sex*Line	2.1	0.0007	0.00270183
1-linoleoylglycerol (18:2)	Line	1.14	0.3428	0.36457
1-linoleoylglycerol (18:2)	Sex	321.03	<.0001	7.5449e-20
1-linoleoylglycerol (18:2)	Sex*Line	1.09	0.3457	0.61654
1-linoleoyl-GPA (18:2)*	Line	4.16	<.0001	2.80515e-05
1-linoleoyl-GPA (18:2)*	Sex	624.84	<.0001	7.6932e-25
1-linoleoyl-GPA (18:2)*	Sex*Line	0.38	0.9997	1
1-linoleoyl-GPC (18:2)	Line	1	0.501	0.51233
1-linoleoyl-GPC (18:2)	Sex	2715.62	<.0001	4.2467e-36
1-linoleoyl-GPC (18:2)	Sex*Line	2.06	0.001	0.00354279
1-linoleoyl-GPE (18:2)*	Line	1.63	0.065	0.0758747
1-linoleoyl-GPE (18:2)*	Sex	3497.39	<.0001	7.3234e-38
1-linoleoyl-GPE (18:2)*	Sex*Line	1.56	0.0291	0.0737613
1-linoleoyl-GPG (18:2)*	Line	2.58	0.002	0.0029072
1-linoleoyl-GPG (18:2)*	Sex	1487.88	<.0001	1.2919e-31
1-linoleoyl-GPG (18:2)*	Sex*Line	0.55	0.9848	1
1-linoleoyl-GPI (18:2)*	Line	1.19	0.2929	0.317473
1-linoleoyl-GPI (18:2)*	Sex	1387.21	<.0001	4.5854e-31
1-linoleoyl-GPI (18:2)*	Sex*Line	1.32	0.1175	0.251116
1-linoleoyl-GPS (18:2)*	Line	1.2	0.29	0.315063
1-linoleoyl-GPS (18:2)*	Sex	790.99	<.0001	1.1862e-26
1-linoleoyl-GPS (18:2)*	Sex*Line	1.47	0.0509	0.120651
1-methyladenine	Line	5.48	<.0001	9.75195e-07
1-methyladenine	Sex	198.04	<.0001	2.1309e-16
1-methyladenine	Sex*Line	3.39	<.0001	3.22499e-07
1-methylhistamine	Line	14.1	<.0001	2.5695e-12
1-methylhistamine	Sex	304.5	<.0001	1.7747e-19
1-methylhistamine	Sex*Line	1.45	0.0566	0.132924
1-methylhistidine	Line	2.99	0.0004	0.00076311
1-methylhistidine	Sex	86.65	<.0001	3.8353e-11
1-methylhistidine	Sex*Line	1.32	0.1198	0.254708
1-methylimidazoleacetate	Line	2.65	0.0015	0.00230231
1-methylimidazoleacetate	Sex	2.07	0.1578	0.175646
1-methylimidazoleacetate	Sex*Line	1.05	0.3977	0.675634
1-methylurate	Line	15.62	<.0001	6.433e-13
1-methylurate	Sex	358.62	<.0001	1.159e-20
1-methylurate	Sex*Line	1.26	0.159	0.323723
1-oleoyl-2-linoleoyl-glycerol (18:1/18:2)	Line	2.84	0.0008	0.00121505
1-oleoyl-2-linoleoyl-glycerol (18:1/18:2)	Sex	30.9	<.0001	3.36e-06
1-oleoyl-2-linoleoyl-glycerol (18:1/18:2)	Sex*Line	3.02	<.0001	4.26e-06
1-oleoyl-2-linoleoyl-GPC (18:1/18:2)*	Line	1.29	0.2167	0.238794
1-oleoyl-2-linoleoyl-GPC (18:1/18:2)*	Sex	2419.22	<.0001	2.7621e-35
1-oleoyl-2-linoleoyl-GPC (18:1/18:2)*	Sex*Line	1.74	0.0095	0.0273764
1-oleoyl-2-linoleoyl-GPE (18:1/18:2)*	Line	1.26	0.237	0.260546
1-oleoyl-2-linoleoyl-GPE (18:1/18:2)*	Sex	2081.08	<.0001	3.369e-34
1-oleoyl-2-linoleoyl-GPE (18:1/18:2)*	Sex*Line	1.71	0.0113	0.0323435
1-oleoyl-2-linoleoyl-GPI (18:1/18:2)*	Line	2.1	0.0116	0.0148386
1-oleoyl-2-linoleoyl-GPI (18:1/18:2)*	Sex	2370.85	<.0001	3.8438e-35
1-oleoyl-2-linoleoyl-GPI (18:1/18:2)*	Sex*Line	3.13	<.0001	1.94105e-06
1-oleoyl-3-linoleoyl-glycerol (18:1/18:2)	Line	2.54	0.0022	0.00323764
1-oleoyl-3-linoleoyl-glycerol (18:1/18:2)	Sex	648.98	<.0001	3.9941e-25
1-oleoyl-3-linoleoyl-glycerol (18:1/18:2)	Sex*Line	3.41	<.0001	2.81327e-07
1-oleoyl-GPA (18:1)	Line	1.15	0.3362	0.358962
1-oleoyl-GPA (18:1)	Sex	314.55	<.0001	1.0255e-19
1-oleoyl-GPA (18:1)	Sex*Line	0.79	0.8003	1
1-oleoyl-GPC (18:1)	Line	0.99	0.5062	0.516499
1-oleoyl-GPC (18:1)	Sex	2106.56	<.0001	2.9007e-34
1-oleoyl-GPC (18:1)	Sex*Line	2.12	0.0006	0.00232814
1-oleoyl-GPE (18:1)	Line	1.97	0.0189	0.0233012
1-oleoyl-GPE (18:1)	Sex	2617.05	<.0001	7.9799e-36
1-oleoyl-GPE (18:1)	Sex*Line	1.03	0.4296	0.705147
1-oleoyl-GPG (18:1)*	Line	1.49	0.1083	0.122299
1-oleoyl-GPG (18:1)*	Sex	5289.85	<.0001	1.3111e-40
1-oleoyl-GPG (18:1)*	Sex*Line	1.89	0.0033	0.0107447
1-oleoyl-GPI (18:1)*	Line	2.11	0.011	0.0142797
1-oleoyl-GPI (18:1)*	Sex	1525.36	<.0001	8.5687e-32
1-oleoyl-GPI (18:1)*	Sex*Line	0.43	0.9985	1
1-oleoyl-GPS (18:1)	Line	0.93	0.5901	0.596665
1-oleoyl-GPS (18:1)	Sex	56.42	<.0001	7.78958e-09
1-oleoyl-GPS (18:1)	Sex*Line	4.46	<.0001	1.4956e-10
1-palmitoleoyl-2-linolenoyl-GPC (16:1/18:3)*	Line	1.85	0.0289	0.0348551
1-palmitoleoyl-2-linolenoyl-GPC (16:1/18:3)*	Sex	1486.68	<.0001	1.2919e-31
1-palmitoleoyl-2-linolenoyl-GPC (16:1/18:3)*	Sex*Line	0.41	0.9991	1
1-palmitoleoyl-2-linoleoyl-GPC (16:1/18:2)*	Line	1.38	0.1584	0.177615
1-palmitoleoyl-2-linoleoyl-GPC (16:1/18:2)*	Sex	2154.46	<.0001	1.9711e-34
1-palmitoleoyl-2-linoleoyl-GPC (16:1/18:2)*	Sex*Line	3.39	<.0001	3.30422e-07
1-palmitoleoyl-2-oleoyl-glycerol (16:1/18:1)*	Line	2.29	0.0056	0.00766833
1-palmitoleoyl-2-oleoyl-glycerol (16:1/18:1)*	Sex	265.5	<.0001	1.7661e-18
1-palmitoleoyl-2-oleoyl-glycerol (16:1/18:1)*	Sex*Line	3.41	<.0001	2.81327e-07
1-palmitoleoyl-3-oleoyl-glycerol (16:1/18:1)*	Line	2.32	0.0051	0.007002
1-palmitoleoyl-3-oleoyl-glycerol (16:1/18:1)*	Sex	1333.35	<.0001	9.2766e-31
1-palmitoleoyl-3-oleoyl-glycerol (16:1/18:1)*	Sex*Line	3.96	<.0001	5.40931e-09
1-palmitoleoyl-GPC (16:1)*	Line	2.39	0.0038	0.00534331
1-palmitoleoyl-GPC (16:1)*	Sex	4137.29	<.0001	7.6029e-39
1-palmitoleoyl-GPC (16:1)*	Sex*Line	1.51	0.0414	0.101699
1-palmitoyl-2-linolenoyl-galactosylglycerol (16:0/1	Line	0.92	0.6006	0.605997
1-palmitoyl-2-linolenoyl-galactosylglycerol (16:0/1	Sex	319.15	<.0001	8.2896e-20
1-palmitoyl-2-linolenoyl-galactosylglycerol (16:0/1	Sex*Line	2.71	<.0001	4.11973e-05
1-palmitoyl-2-linoleoyl-galactosylglycerol (16:0/18	Line	1.21	0.2749	0.300072
1-palmitoyl-2-linoleoyl-galactosylglycerol (16:0/18	Sex	406.7	<.0001	1.3022e-21
1-palmitoyl-2-linoleoyl-galactosylglycerol (16:0/18	Sex*Line	2.12	0.0006	0.00243823
1-palmitoyl-2-linoleoyl-glycerol (16:0/18:2)*	Line	3.85	<.0001	6.30642e-05
1-palmitoyl-2-linoleoyl-glycerol (16:0/18:2)*	Sex	30.61	<.0001	3.62599e-06
1-palmitoyl-2-linoleoyl-glycerol (16:0/18:2)*	Sex*Line	1.27	0.1545	0.318961
1-palmitoyl-2-linoleoyl-GPC (16:0/18:2)	Line	1.51	0.1009	0.114866
1-palmitoyl-2-linoleoyl-GPC (16:0/18:2)	Sex	2438.71	<.0001	2.5156e-35
1-palmitoyl-2-linoleoyl-GPC (16:0/18:2)	Sex*Line	2.11	0.0006	0.00246663
1-palmitoyl-2-linoleoyl-GPE (16:0/18:2)	Line	1.09	0.3992	0.419547
1-palmitoyl-2-linoleoyl-GPE (16:0/18:2)	Sex	1021.32	<.0001	1.1829e-28
1-palmitoyl-2-linoleoyl-GPE (16:0/18:2)	Sex*Line	2.26	0.0002	0.00095632
1-palmitoyl-2-linoleoyl-GPI (16:0/18:2)	Line	1.75	0.0429	0.050974
1-palmitoyl-2-linoleoyl-GPI (16:0/18:2)	Sex	2555.17	<.0001	1.1736e-35
1-palmitoyl-2-linoleoyl-GPI (16:0/18:2)	Sex*Line	3.95	<.0001	5.40931e-09
1-palmitoyl-2-oleoyl-GPC (16:0/18:1)	Line	1.31	0.2025	0.22485
1-palmitoyl-2-oleoyl-GPC (16:0/18:1)	Sex	3358.82	<.0001	1.0626e-37
1-palmitoyl-2-oleoyl-GPC (16:0/18:1)	Sex*Line	2.07	0.0009	0.00335003
1-palmitoyl-2-oleoyl-GPE (16:0/18:1)	Line	1.15	0.3308	0.355137
1-palmitoyl-2-oleoyl-GPE (16:0/18:1)	Sex	2487.4	<.0001	1.8357e-35
1-palmitoyl-2-oleoyl-GPE (16:0/18:1)	Sex*Line	3.32	<.0001	5.42496e-07
1-palmitoyl-2-palmitoleoyl-GPC (16:0/16:1)*	Line	1.59	0.0768	0.0887719
1-palmitoyl-2-palmitoleoyl-GPC (16:0/16:1)*	Sex	410.68	<.0001	1.1255e-21
1-palmitoyl-2-palmitoleoyl-GPC (16:0/16:1)*	Sex*Line	2.41	<.0001	0.00033446
1-palmitoyl-2-stearoyl-GPC (16:0/18:0)	Line	1.59	0.075	0.0868793
1-palmitoyl-2-stearoyl-GPC (16:0/18:0)	Sex	1289.99	<.0001	1.6602e-30
1-palmitoyl-2-stearoyl-GPC (16:0/18:0)	Sex*Line	0.59	0.9708	1
1-palmitoyl-3-linoleoyl-glycerol (16:0/18:2)*	Line	4.93	<.0001	3.70426e-06
1-palmitoyl-3-linoleoyl-glycerol (16:0/18:2)*	Sex	2099.77	<.0001	2.9571e-34
1-palmitoyl-3-linoleoyl-glycerol (16:0/18:2)*	Sex*Line	1.38	0.0884	0.201134
1-palmitoyl-GPA (16:0)	Line	1.75	0.043	0.0510294
1-palmitoyl-GPA (16:0)	Sex	304.22	<.0001	1.7792e-19
1-palmitoyl-GPA (16:0)	Sex*Line	0.74	0.8618	1
1-palmitoyl-GPC (16:0)	Line	1.23	0.2602	0.284708
1-palmitoyl-GPC (16:0)	Sex	1792.01	<.0001	4.4558e-33
1-palmitoyl-GPC (16:0)	Sex*Line	2.61	<.0001	7.80433e-05
1-palmitoyl-GPE (16:0)	Line	1.54	0.0924	0.105646
1-palmitoyl-GPE (16:0)	Sex	1435.34	<.0001	2.458e-31
1-palmitoyl-GPE (16:0)	Sex*Line	1.64	0.018	0.0475328
1-palmitoyl-GPG (16:0)*	Line	2.51	0.0025	0.00358971
1-palmitoyl-GPG (16:0)*	Sex	1660.36	<.0001	1.8546e-32
1-palmitoyl-GPG (16:0)*	Sex*Line	0.42	0.9989	1
1-palmitoyl-GPI (16:0)*	Line	1.18	0.3035	0.327358
1-palmitoyl-GPI (16:0)*	Sex	477.7	<.0001	8.3235e-23
1-palmitoyl-GPI (16:0)*	Sex*Line	1.59	0.0249	0.0644877
1-stearoyl-2-linoleoyl-GPC (18:0/18:2)*	Line	1.04	0.4526	0.471279
1-stearoyl-2-linoleoyl-GPC (18:0/18:2)*	Sex	1571.23	<.0001	5.154e-32
1-stearoyl-2-linoleoyl-GPC (18:0/18:2)*	Sex*Line	3.58	<.0001	8.09599e-08
1-stearoyl-2-linoleoyl-GPE (18:0/18:2)*	Line	1.12	0.3655	0.387775
1-stearoyl-2-linoleoyl-GPE (18:0/18:2)*	Sex	2255.26	<.0001	9.0033e-35
1-stearoyl-2-linoleoyl-GPE (18:0/18:2)*	Sex*Line	2.45	<.0001	0.00025066
1-stearoyl-2-oleoyl-GPC (18:0/18:1)	Line	1.6	0.0746	0.0866423
1-stearoyl-2-oleoyl-GPC (18:0/18:1)	Sex	1839.79	<.0001	2.9654e-33
1-stearoyl-2-oleoyl-GPC (18:0/18:1)	Sex*Line	0.33	0.9999	1
1-stearoyl-2-oleoyl-GPE (18:0/18:1)	Line	2.21	0.0077	0.0102815
1-stearoyl-2-oleoyl-GPE (18:0/18:1)	Sex	3114.75	<.0001	4.0428e-37
1-stearoyl-2-oleoyl-GPE (18:0/18:1)	Sex*Line	0.52	0.9909	1
1-stearoyl-GPC (18:0)	Line	1.79	0.0369	0.0441513
1-stearoyl-GPC (18:0)	Sex	1800.72	<.0001	4.1888e-33
1-stearoyl-GPC (18:0)	Sex*Line	0.64	0.9468	1
1-stearoyl-GPE (18:0)	Line	1.89	0.0251	0.0303236
1-stearoyl-GPE (18:0)	Sex	2249.81	<.0001	9.0033e-35
1-stearoyl-GPE (18:0)	Sex*Line	3.03	<.0001	3.92067e-06
1-stearoyl-GPI (18:0)	Line	1	0.5	0.51233
1-stearoyl-GPI (18:0)	Sex	624.46	<.0001	7.6932e-25
1-stearoyl-GPI (18:0)	Sex*Line	3.19	<.0001	1.37252e-06
2,3-dihydroxyisovalerate	Line	7.56	<.0001	1.75012e-08
2,3-dihydroxyisovalerate	Sex	8.59	0.0056	0.00708293
2,3-dihydroxyisovalerate	Sex*Line	0.31	1	1
2-aminooctanoate	Line	5.11	<.0001	2.35552e-06
2-aminooctanoate	Sex	83.59	<.0001	6.1505e-11
2-aminooctanoate	Sex*Line	2.38	<.0001	0.00041866
2'-deoxycytidine	Line	1.5	0.1035	0.117408
2'-deoxycytidine	Sex	601.04	<.0001	1.513e-24
2'-deoxycytidine	Sex*Line	2.29	0.0002	0.00076773
2'-deoxyguanosine	Line	2.71	0.0012	0.00183405
2'-deoxyguanosine	Sex	170.12	<.0001	2.3054e-15
2'-deoxyguanosine	Sex*Line	1.02	0.4487	0.729673
2'-deoxyinosine	Line	4.45	<.0001	1.24776e-05
2'-deoxyinosine	Sex	527.96	<.0001	1.4338e-23
2'-deoxyinosine	Sex*Line	0.98	0.5118	0.791358
2'-deoxyuridine	Line	2.7	0.0013	0.00193933
2'-deoxyuridine	Sex	276.57	<.0001	8.8482e-19
2'-deoxyuridine	Sex*Line	2.58	<.0001	9.71967e-05
2-hydroxy-3-methylvalerate	Line	7.19	<.0001	3.2253e-08
2-hydroxy-3-methylvalerate	Sex	74.48	<.0001	2.7119e-10
2-hydroxy-3-methylvalerate	Sex*Line	0.74	0.8594	1
2-hydroxybutyrate/2-hydroxyisobutyrate	Line	2.31	0.0053	0.00726389
2-hydroxybutyrate/2-hydroxyisobutyrate	Sex	10.07	0.0029	0.0038318
2-hydroxybutyrate/2-hydroxyisobutyrate	Sex*Line	0.69	0.9135	1
2-hydroxyglutarate	Line	3.94	<.0001	5.00625e-05
2-hydroxyglutarate	Sex	33.51	<.0001	1.63665e-06
2-hydroxyglutarate	Sex*Line	0.96	0.5358	0.811539
2-isopropylmalate	Line	6.15	<.0001	2.34707e-07
2-isopropylmalate	Sex	23.83	<.0001	2.71679e-05
2-isopropylmalate	Sex*Line	0.36	0.9998	1
2-keto-3-deoxy-gluconate	Line	3.94	<.0001	4.91016e-05
2-keto-3-deoxy-gluconate	Sex	3.42	0.0722	0.0838338
2-keto-3-deoxy-gluconate	Sex*Line	0.66	0.9379	1
2-ketogluconate	Line	5.98	<.0001	3.41605e-07
2-ketogluconate	Sex	48.8	<.0001	3.88026e-08
2-ketogluconate	Sex*Line	0.61	0.9661	1
2-linoleoylglycerol (18:2)	Line	0.74	0.8295	0.833201
2-linoleoylglycerol (18:2)	Sex	458.01	<.0001	1.7237e-22
2-linoleoylglycerol (18:2)	Sex*Line	1.36	0.0955	0.213171
2-methylcitrate	Line	7.8	<.0001	1.12051e-08
2-methylcitrate	Sex	10.86	0.0021	0.00276331
2-methylcitrate	Sex*Line	0.75	0.8541	1
2-methylserine	Line	4.7	<.0001	6.68377e-06
2-methylserine	Sex	0.31	0.5829	0.608392
2-methylserine	Sex*Line	0.82	0.7612	0.998103
2'-O-methylguanosine	Line	3.41	0.0001	0.00021947
2'-O-methylguanosine	Sex	166.17	<.0001	3.2891e-15
2'-O-methylguanosine	Sex*Line	5.67	<.0001	5.6208e-14
2-palmitoleoylglycerol (16:1)*	Line	1.68	0.0549	0.0645814
2-palmitoleoylglycerol (16:1)*	Sex	120.73	<.0001	3.7484e-13
2-palmitoleoylglycerol (16:1)*	Sex*Line	1.03	0.428	0.705019
2-palmitoleoyl-GPC (16:1)*	Line	1.93	0.0215	0.0263057
2-palmitoleoyl-GPC (16:1)*	Sex	3466.9	<.0001	7.3234e-38
2-palmitoleoyl-GPC (16:1)*	Sex*Line	1.48	0.0497	0.119138
2-palmitoyl-GPC (16:0)*	Line	0.98	0.5231	0.531313
2-palmitoyl-GPC (16:0)*	Sex	248.78	<.0001	5.2191e-18
2-palmitoyl-GPC (16:0)*	Sex*Line	6.36	<.0001	7.26e-16
2-phosphoglycerate	Line	1.94	0.0204	0.0250877
2-phosphoglycerate	Sex	202.9	<.0001	1.4511e-16
2-phosphoglycerate	Sex*Line	1.75	0.0087	0.0256892
2-stearoyl-GPE (18:0)*	Line	1.62	0.0679	0.0790361
2-stearoyl-GPE (18:0)*	Sex	2329.21	<.0001	5.1165e-35
2-stearoyl-GPE (18:0)*	Sex*Line	1.18	0.2412	0.464953
3-(4-hydroxyphenyl)lactate	Line	7.04	<.0001	4.17203e-08
3-(4-hydroxyphenyl)lactate	Sex	43.24	<.0001	1.39789e-07
3-(4-hydroxyphenyl)lactate	Sex*Line	0.94	0.572	0.845682
3,4-dihydroxyphenylacetate	Line	0.76	0.8034	0.808767
3,4-dihydroxyphenylacetate	Sex	318.47	<.0001	8.5344e-20
3,4-dihydroxyphenylacetate	Sex*Line	5.1	<.0001	2.5873e-12
3-aminoisobutyrate	Line	9.04	<.0001	1.41079e-09
3-aminoisobutyrate	Sex	207.17	<.0001	1.0511e-16
3-aminoisobutyrate	Sex*Line	1.01	0.4656	0.74259
3-hydroxy-3-methylglutarate	Line	8.9	<.0001	1.76367e-09
3-hydroxy-3-methylglutarate	Sex	0.38	0.5427	0.573033
3-hydroxy-3-methylglutarate	Sex*Line	0.59	0.9719	1
3-hydroxybutyrate (BHBA)	Line	2.92	0.0006	0.0009598
3-hydroxybutyrate (BHBA)	Sex	61.12	<.0001	3.06675e-09
3-hydroxybutyrate (BHBA)	Sex*Line	0.71	0.8907	1
3-hydroxybutyrylcarnitine (2)	Line	6.63	<.0001	9.47135e-08
3-hydroxybutyrylcarnitine (2)	Sex	1.35	0.2521	0.272601
3-hydroxybutyrylcarnitine (2)	Sex*Line	2.67	<.0001	5.29547e-05
3-hydroxydecanoate	Line	18.18	<.0001	5.9494e-14
3-hydroxydecanoate	Sex	3.29	0.0775	0.0898045
3-hydroxydecanoate	Sex*Line	0.48	0.9956	1
3-hydroxyisobutyrate	Line	7.48	<.0001	2.06014e-08
3-hydroxyisobutyrate	Sex	141.59	<.0001	3.6717e-14
3-hydroxyisobutyrate	Sex*Line	0.83	0.7508	0.991545
3-hydroxykynurenine	Line	8.04	<.0001	7.66578e-09
3-hydroxykynurenine	Sex	151.55	<.0001	1.3317e-14
3-hydroxykynurenine	Sex*Line	4.65	<.0001	4.6117e-11
3-hydroxylaurate	Line	19.85	<.0001	1.4092e-14
3-hydroxylaurate	Sex	18.01	0.0001	0.00018902
3-hydroxylaurate	Sex*Line	0.59	0.9734	1
3-hydroxymyristate	Line	4.03	<.0001	3.808e-05
3-hydroxymyristate	Sex	94.97	<.0001	1.1029e-11
3-hydroxymyristate	Sex*Line	1.49	0.0454	0.109972
3-hydroxyoctanoate	Line	21.02	<.0001	5.6966e-15
3-hydroxyoctanoate	Sex	5.45	0.0248	0.0301756
3-hydroxyoctanoate	Sex*Line	0.35	0.9999	1
3-hydroxypalmitate	Line	2.89	0.0006	0.00105448
3-hydroxypalmitate	Sex	79.23	<.0001	1.2328e-10
3-hydroxypalmitate	Sex*Line	1.82	0.0052	0.0161189
3-hydroxypropanoate	Line	12.48	<.0001	1.281e-11
3-hydroxypropanoate	Sex	63.07	<.0001	2.11327e-09
3-hydroxypropanoate	Sex*Line	0.43	0.9987	1
3-hydroxysebacate	Line	9.29	<.0001	9.6866e-10
3-hydroxysebacate	Sex	2.76	0.1046	0.119334
3-hydroxysebacate	Sex*Line	0.69	0.9118	1
3-hydroxysuberate	Line	4.04	<.0001	3.71779e-05
3-hydroxysuberate	Sex	7.56	0.009	0.0111812
3-hydroxysuberate	Sex*Line	0.8	0.7872	1
3-ketosphinganine	Line	6.68	<.0001	8.48935e-08
3-ketosphinganine	Sex	136.01	<.0001	6.6604e-14
3-ketosphinganine	Sex*Line	0.38	0.9996	1
3-methyl-2-oxobutyrate	Line	3.14	0.0003	0.00049143
3-methyl-2-oxobutyrate	Sex	784.71	<.0001	1.3543e-26
3-methyl-2-oxobutyrate	Sex*Line	1.45	0.0576	0.133902
3-methyl-2-oxovalerate	Line	3.3	0.0002	0.00030048
3-methyl-2-oxovalerate	Sex	350.72	<.0001	1.6713e-20
3-methyl-2-oxovalerate	Sex*Line	0.38	0.9997	1
3-methylcytidine	Line	3.62	<.0001	0.00012054
3-methylcytidine	Sex	0.24	0.6258	0.65025
3-methylcytidine	Sex*Line	0.63	0.9549	1
3-methylhistidine	Line	5.29	<.0001	1.55e-06
3-methylhistidine	Sex	1.8	0.1879	0.207049
3-methylhistidine	Sex*Line	1.01	0.4618	0.739204
3-phosphoglycerate	Line	5.22	<.0001	1.84506e-06
3-phosphoglycerate	Sex	14.88	0.0004	0.00057814
3-phosphoglycerate	Sex*Line	0.28	1	1
3-ureidopropionate	Line	2.84	0.0008	0.00121714
3-ureidopropionate	Sex	0.47	0.4951	0.524029
3-ureidopropionate	Sex*Line	1.17	0.2507	0.479277
4-guanidinobutanoate	Line	2.81	0.0009	0.00134282
4-guanidinobutanoate	Sex	4.6	0.0383	0.0457563
4-guanidinobutanoate	Sex*Line	1.37	0.093	0.210643
4-hydroxybenzoate	Line	10.97	<.0001	7.7301e-11
4-hydroxybenzoate	Sex	17.84	0.0001	0.00019996
4-hydroxybenzoate	Sex*Line	0.77	0.831	1
4-hydroxybutyrate (GHB)	Line	2	0.0167	0.0207165
4-hydroxybutyrate (GHB)	Sex	101.03	<.0001	4.681e-12
4-hydroxybutyrate (GHB)	Sex*Line	1.34	0.1099	0.238308
4-hydroxyhippurate	Line	22.76	<.0001	1.5787e-15
4-hydroxyhippurate	Sex	1.74	0.1945	0.213874
4-hydroxyhippurate	Sex*Line	0.38	0.9997	1
4-hydroxyphenylpyruvate	Line	1.02	0.4758	0.494363
4-hydroxyphenylpyruvate	Sex	26.08	<.0001	1.36459e-05
4-hydroxyphenylpyruvate	Sex*Line	0.78	0.8212	1
4-imidazoleacetate	Line	3.45	<.0001	0.00019874
4-imidazoleacetate	Sex	11.51	0.0016	0.00212567
4-imidazoleacetate	Sex*Line	0.87	0.6805	0.944702
4-methyl-2-oxopentanoate	Line	3.36	0.0001	0.00025666
4-methyl-2-oxopentanoate	Sex	471.9	<.0001	1.0164e-22
4-methyl-2-oxopentanoate	Sex*Line	0.84	0.7269	0.977078
5-aminolevulinate	Line	11.43	<.0001	4.3454e-11
5-aminolevulinate	Sex	0.04	0.8472	0.860521
5-aminolevulinate	Sex*Line	0.69	0.9151	1
5-dodecenoate (12:1n7)	Line	5.89	<.0001	3.95668e-07
5-dodecenoate (12:1n7)	Sex	32.81	<.0001	1.98131e-06
5-dodecenoate (12:1n7)	Sex*Line	1.26	0.1594	0.323723
5-methylthioadenosine (MTA)	Line	2.47	0.0029	0.00411518
5-methylthioadenosine (MTA)	Sex	25.15	<.0001	1.80579e-05
5-methylthioadenosine (MTA)	Sex*Line	1.02	0.4494	0.729673
5-methyluridine (ribothymidine)	Line	1.06	0.4309	0.450809
5-methyluridine (ribothymidine)	Sex	214.54	<.0001	5.9796e-17
5-methyluridine (ribothymidine)	Sex*Line	2.49	<.0001	0.0001854
5-oxoproline	Line	7.36	<.0001	2.50729e-08
5-oxoproline	Sex	76.68	<.0001	1.8727e-10
5-oxoproline	Sex*Line	2.29	0.0002	0.00078406
6-phosphogluconate	Line	4.07	<.0001	3.48927e-05
6-phosphogluconate	Sex	8.19	0.0067	0.00843194
6-phosphogluconate	Sex*Line	1.34	0.1074	0.235655
7-methylguanine	Line	7.13	<.0001	3.51937e-08
7-methylguanine	Sex	7.69	0.0085	0.0105425
7-methylguanine	Sex*Line	13.28	<.0001	2.665e-31
7-methylguanosine	Line	2.27	0.006	0.00811904
7-methylguanosine	Sex	63.94	<.0001	1.80098e-09
7-methylguanosine	Sex*Line	1.05	0.3997	0.675634
9,10-DiHOME	Line	13.15	<.0001	6.0916e-12
9,10-DiHOME	Sex	14.18	0.0005	0.00075603
9,10-DiHOME	Sex*Line	1.08	0.3564	0.633133
acetylcarnitine	Line	3.44	0.0001	0.00020527
acetylcarnitine	Sex	51.46	<.0001	2.18481e-08
acetylcarnitine	Sex*Line	1.71	0.0117	0.0330268
acetylphosphate	Line	6.41	<.0001	1.38615e-07
acetylphosphate	Sex	37.52	<.0001	5.69013e-07
acetylphosphate	Sex*Line	0.86	0.7003	0.955554
aconitate [cis or trans]	Line	7.36	<.0001	2.50729e-08
aconitate [cis or trans]	Sex	71.29	<.0001	4.7027e-10
aconitate [cis or trans]	Sex*Line	0.42	0.9989	1
adenine	Line	3.26	0.0002	0.00033611
adenine	Sex	51.67	<.0001	2.09705e-08
adenine	Sex*Line	4.47	<.0001	1.477e-10
adenosine	Line	2.89	0.0006	0.0010412
adenosine	Sex	2.27	0.1401	0.156688
adenosine	Sex*Line	0.93	0.5904	0.857168
adenosine 3'-monophosphate (3'-AMP)	Line	5.84	<.0001	4.48712e-07
adenosine 3'-monophosphate (3'-AMP)	Sex	106.73	<.0001	2.1668e-12
adenosine 3'-monophosphate (3'-AMP)	Sex*Line	0.94	0.5824	0.856569
adenosine 5'-monophosphate (AMP)	Line	9.28	<.0001	9.6866e-10
adenosine 5'-monophosphate (AMP)	Sex	0.09	0.7655	0.786328
adenosine 5'-monophosphate (AMP)	Sex*Line	0.47	0.9962	1
adenosine-2',3'-cyclic monophosphate	Line	6.09	<.0001	2.68424e-07
adenosine-2',3'-cyclic monophosphate	Sex	133.81	<.0001	8.4469e-14
adenosine-2',3'-cyclic monophosphate	Sex*Line	0.83	0.7487	0.991545
adipate	Line	4.81	<.0001	4.91849e-06
adipate	Sex	3.16	0.0832	0.0961488
adipate	Sex*Line	0.95	0.5631	0.841135
alanine	Line	2.87	0.0007	0.00109403
alanine	Sex	142.66	<.0001	3.2881e-14
alanine	Sex*Line	1.47	0.0508	0.120651
alanylleucine	Line	3.09	0.0003	0.00057217
alanylleucine	Sex	123.33	<.0001	2.7564e-13
alanylleucine	Sex*Line	2.24	0.0002	0.00108108
allantoin	Line	14.31	<.0001	2.0929e-12
allantoin	Sex	9.97	0.0031	0.00397912
allantoin	Sex*Line	0.5	0.9934	1
alpha-hydroxyisocaproate	Line	7.16	<.0001	3.36659e-08
alpha-hydroxyisocaproate	Sex	241.78	<.0001	8.3363e-18
alpha-hydroxyisocaproate	Sex*Line	0.84	0.7337	0.979507
alpha-hydroxyisovalerate	Line	6.71	<.0001	8.22714e-08
alpha-hydroxyisovalerate	Sex	19.31	<.0001	0.00012068
alpha-hydroxyisovalerate	Sex*Line	0.88	0.6651	0.932811
alpha-ketoglutarate	Line	4.13	<.0001	2.99829e-05
alpha-ketoglutarate	Sex	0.89	0.3507	0.376425
alpha-ketoglutarate	Sex*Line	0.92	0.6111	0.878845
alpha-tocopherol	Line	11.08	<.0001	6.9015e-11
alpha-tocopherol	Sex	163.26	<.0001	4.3038e-15
alpha-tocopherol	Sex*Line	0.51	0.9922	1
alpha-tocotrienol	Line	13.95	<.0001	2.7834e-12
alpha-tocotrienol	Sex	7.69	0.0085	0.0105425
alpha-tocotrienol	Sex*Line	1.47	0.052	0.122647
arabitol/xylitol	Line	3.02	0.0004	0.00070345
arabitol/xylitol	Sex	57.06	<.0001	6.87608e-09
arabitol/xylitol	Sex*Line	1.9	0.003	0.00984246
arabonate/xylonate	Line	4.05	<.0001	3.71779e-05
arabonate/xylonate	Sex	40.55	<.0001	2.69395e-07
arabonate/xylonate	Sex*Line	0.84	0.7352	0.979507
arachidate (20:0)	Line	1.64	0.063	0.0737263
arachidate (20:0)	Sex	0.09	0.7711	0.790317
arachidate (20:0)	Sex*Line	1.1	0.3282	0.597095
arginine	Line	4.07	<.0001	3.486e-05
arginine	Sex	139.8	<.0001	4.4426e-14
arginine	Sex*Line	1.56	0.0295	0.0742171
argininosuccinate	Line	5.62	<.0001	7.06078e-07
argininosuccinate	Sex	22.48	<.0001	4.165e-05
argininosuccinate	Sex*Line	1.33	0.1126	0.241833
asparagine	Line	2.87	0.0007	0.00109818
asparagine	Sex	570.29	<.0001	3.6783e-24
asparagine	Sex*Line	3.17	<.0001	1.54266e-06
aspartate	Line	2.87	0.0007	0.0011136
aspartate	Sex	10.55	0.0024	0.00313036
aspartate	Sex*Line	1.78	0.0072	0.0219505
azelate (nonanedioate)	Line	3.03	0.0004	0.00069422
azelate (nonanedioate)	Sex	286.5	<.0001	4.9339e-19
azelate (nonanedioate)	Sex*Line	1.08	0.3673	0.646033
benzoate	Line	1.08	0.408	0.427851
benzoate	Sex	4.2	0.0472	0.0555237
benzoate	Sex*Line	0.9	0.6424	0.906595
beta-alanine	Line	4.61	<.0001	8.31594e-06
beta-alanine	Sex	27.23	<.0001	9.70356e-06
beta-alanine	Sex*Line	0.46	0.9972	1
beta-hydroxyisovalerate	Line	3.88	<.0001	5.7966e-05
beta-hydroxyisovalerate	Sex	1.71	0.1988	0.218037
beta-hydroxyisovalerate	Sex*Line	0.76	0.8373	1
betaine	Line	2.36	0.0043	0.00603755
betaine	Sex	1.7	0.2005	0.219334
betaine	Sex*Line	1.24	0.1749	0.350522
beta-sitosterol	Line	4.35	<.0001	1.6583e-05
beta-sitosterol	Sex	69.8	<.0001	6.1306e-10
beta-sitosterol	Sex*Line	1.23	0.1902	0.375657
biliverdin	Line	4.23	<.0001	2.29767e-05
biliverdin	Sex	106.16	<.0001	2.33e-12
biliverdin	Sex*Line	1.3	0.1321	0.278431
biopterin	Line	3.39	0.0001	0.00022814
biopterin	Sex	595.79	<.0001	1.7545e-24
biopterin	Sex*Line	7.75	<.0001	1.8569e-19
biotin	Line	3.26	0.0002	0.00033611
biotin	Sex	45.33	<.0001	8.54982e-08
biotin	Sex*Line	1.05	0.3993	0.675634
campesterol	Line	3.15	0.0003	0.00047522
campesterol	Sex	149.36	<.0001	1.652e-14
campesterol	Sex*Line	1.94	0.0022	0.00762207
caprate (10:0)	Line	2.42	0.0034	0.0048428
caprate (10:0)	Sex	51.43	<.0001	2.18933e-08
caprate (10:0)	Sex*Line	2.13	0.0006	0.00224388
carboxyethyl-GABA	Line	7.13	<.0001	3.51937e-08
carboxyethyl-GABA	Sex	13.43	0.0007	0.00099785
carboxyethyl-GABA	Sex*Line	0.35	0.9999	1
carnitine	Line	2.83	0.0008	0.00126058
carnitine	Sex	23.24	<.0001	3.275e-05
carnitine	Sex*Line	0.75	0.8577	1
choline	Line	2.05	0.0136	0.0172707
choline	Sex	15.6	0.0003	0.00044702
choline	Sex*Line	1.1	0.3297	0.597376
choline phosphate	Line	12.25	<.0001	1.6283e-11
choline phosphate	Sex	175.11	<.0001	1.4787e-15
choline phosphate	Sex*Line	3.89	<.0001	8.7697e-09
citraconate/glutaconate	Line	3.31	0.0002	0.00029606
citraconate/glutaconate	Sex	2.34	0.1341	0.1511
citraconate/glutaconate	Sex*Line	1.34	0.1077	0.235655
citrate	Line	2.37	0.0041	0.00574376
citrate	Sex	0.31	0.5823	0.608392
citrate	Sex*Line	1.26	0.1591	0.323723
citrulline	Line	5.71	<.0001	5.84629e-07
citrulline	Sex	16.65	0.0002	0.00030432
citrulline	Sex*Line	0.55	0.9848	1
cystathionine	Line	5.99	<.0001	3.34073e-07
cystathionine	Sex	4.44	0.0417	0.0496793
cystathionine	Sex*Line	2.37	<.0001	0.00045425
cysteine	Line	2.72	0.0012	0.00178053
cysteine	Sex	203.14	<.0001	1.4332e-16
cysteine	Sex*Line	1.11	0.315	0.577741
cysteinylglycine	Line	3.53	<.0001	0.00015441
cysteinylglycine	Sex	5.4	0.0254	0.0308243
cysteinylglycine	Sex*Line	1.76	0.0079	0.0237827
cystine	Line	1.55	0.0876	0.100494
cystine	Sex	97.54	<.0001	7.6229e-12
cystine	Sex*Line	4.93	<.0001	7.395e-12
cytidine	Line	2.14	0.0098	0.0129541
cytidine	Sex	1280.2	<.0001	1.8382e-30
cytidine	Sex*Line	2.7	<.0001	4.434e-05
cytidine 2',3'-cyclic monophosphate	Line	2.68	0.0014	0.0020762
cytidine 2',3'-cyclic monophosphate	Sex	803.35	<.0001	9.031e-27
cytidine 2',3'-cyclic monophosphate	Sex*Line	1.43	0.0665	0.153693
cytidine 3'-monophosphate (3'-CMP)	Line	3.01	0.0004	0.00073419
cytidine 3'-monophosphate (3'-CMP)	Sex	89.37	<.0001	2.524e-11
cytidine 3'-monophosphate (3'-CMP)	Sex*Line	0.57	0.9806	1
cytidine 5'-diphosphocholine	Line	1.11	0.3718	0.392647
cytidine 5'-diphosphocholine	Sex	56.38	<.0001	7.81799e-09
cytidine 5'-diphosphocholine	Sex*Line	2.19	0.0004	0.00148577
cytidine 5'-monophosphate (5'-CMP)	Line	8.01	<.0001	7.9219e-09
cytidine 5'-monophosphate (5'-CMP)	Sex	19.01	<.0001	0.00013316
cytidine 5'-monophosphate (5'-CMP)	Sex*Line	1.67	0.015	0.0409112
cytidine-5'-diphosphoethanolamine	Line	3.08	0.0003	0.00058457
cytidine-5'-diphosphoethanolamine	Sex	32.57	<.0001	2.10658e-06
cytidine-5'-diphosphoethanolamine	Sex*Line	2.23	0.0003	0.00117891
cytosine	Line	7.44	<.0001	2.16905e-08
cytosine	Sex	57.37	<.0001	6.48305e-09
cytosine	Sex*Line	1.06	0.386	0.662261
dehydroascorbate	Line	1.9	0.0243	0.0293851
dehydroascorbate	Sex	0.03	0.8694	0.879108
dehydroascorbate	Sex*Line	2.93	<.0001	8.12078e-06
deoxycarnitine	Line	7.92	<.0001	9.04566e-09
deoxycarnitine	Sex	32.19	<.0001	2.33821e-06
deoxycarnitine	Sex*Line	1.12	0.3053	0.56451
dihomo-linoleate (20:2n6)	Line	2.02	0.0154	0.0192294
dihomo-linoleate (20:2n6)	Sex	681.62	<.0001	1.7094e-25
dihomo-linoleate (20:2n6)	Sex*Line	1.27	0.1549	0.318961
dihydoxyphenylalanine (L-DOPA)	Line	2.23	0.0069	0.00930381
dihydoxyphenylalanine (L-DOPA)	Sex	155.9	<.0001	8.6953e-15
dihydoxyphenylalanine (L-DOPA)	Sex*Line	3.14	<.0001	1.90097e-06
dihydrobiopterin	Line	6.51	<.0001	1.17119e-07
dihydrobiopterin	Sex	673.51	<.0001	2.102e-25
dihydrobiopterin	Sex*Line	3.62	<.0001	6.01649e-08
dihydroxyacetone phosphate (DHAP)	Line	2.57	0.002	0.00299565
dihydroxyacetone phosphate (DHAP)	Sex	13.03	0.0009	0.00116701
dihydroxyacetone phosphate (DHAP)	Sex*Line	1.51	0.0416	0.101699
dimethylarginine (SDMA + ADMA)	Line	4.84	<.0001	4.57792e-06
dimethylarginine (SDMA + ADMA)	Sex	422.63	<.0001	6.8712e-22
dimethylarginine (SDMA + ADMA)	Sex*Line	3	<.0001	4.85891e-06
docosadienoate (22:2n6)	Line	1.36	0.1712	0.191525
docosadienoate (22:2n6)	Sex	127.99	<.0001	1.6219e-13
docosadienoate (22:2n6)	Sex*Line	0.64	0.9485	1
dodecanedioate	Line	7.32	<.0001	2.59556e-08
dodecanedioate	Sex	170.96	<.0001	2.1433e-15
dodecanedioate	Sex*Line	1.01	0.4581	0.73849
eicosenoate (20:1)	Line	2.22	0.0073	0.00981722
eicosenoate (20:1)	Sex	48.57	<.0001	4.0648e-08
eicosenoate (20:1)	Sex*Line	0.81	0.7712	0.998383
ergosterol	Line	2.91	0.0006	0.0009837
ergosterol	Sex	65.64	<.0001	1.30597e-09
ergosterol	Sex*Line	1.57	0.0288	0.0732473
ergothioneine	Line	2.75	0.001	0.00159795
ergothioneine	Sex	4.17	0.048	0.0563759
ergothioneine	Sex*Line	0.79	0.8053	1
erucate (22:1n9)	Line	2.27	0.0061	0.0083115
erucate (22:1n9)	Sex	257.3	<.0001	2.9707e-18
erucate (22:1n9)	Sex*Line	0.62	0.9584	1
erythritol	Line	4.61	<.0001	8.22e-06
erythritol	Sex	9.51	0.0038	0.0048127
erythritol	Sex*Line	0.62	0.958	1
erythronate*	Line	4.75	<.0001	5.78961e-06
erythronate*	Sex	37.56	<.0001	5.64734e-07
erythronate*	Sex*Line	0.87	0.6861	0.944702
ethylmalonate	Line	8.42	<.0001	4.03411e-09
ethylmalonate	Sex	61.78	<.0001	2.70348e-09
ethylmalonate	Sex*Line	0.9	0.6335	0.899672
flavin mononucleotide (FMN)	Line	11.72	<.0001	3.1107e-11
flavin mononucleotide (FMN)	Sex	15.09	0.0004	0.00053764
flavin mononucleotide (FMN)	Sex*Line	0.75	0.8499	1
fructose	Line	3.73	<.0001	8.73817e-05
fructose	Sex	0.01	0.9142	0.920277
fructose	Sex*Line	1.05	0.4059	0.678572
fumarate	Line	2.58	0.002	0.00291957
fumarate	Sex	125.36	<.0001	2.1802e-13
fumarate	Sex*Line	2.27	0.0002	0.00089789
galactonate	Line	1.29	0.2134	0.236319
galactonate	Sex	8.33	0.0063	0.00793301
galactonate	Sex*Line	0.52	0.9913	1
galactose 1-phosphate	Line	5.93	<.0001	3.70494e-07
galactose 1-phosphate	Sex	2.6	0.1151	0.130667
galactose 1-phosphate	Sex*Line	0.74	0.8668	1
gamma-aminobutyrate (GABA)	Line	3.01	0.0004	0.00072701
gamma-aminobutyrate (GABA)	Sex	77.16	<.0001	1.7338e-10
gamma-aminobutyrate (GABA)	Sex*Line	0.68	0.9236	1
gamma-glutamylalanine	Line	3.57	<.0001	0.00013902
gamma-glutamylalanine	Sex	40.34	<.0001	2.82927e-07
gamma-glutamylalanine	Sex*Line	0.8	0.7876	1
gamma-glutamylglutamate	Line	2.03	0.015	0.0187247
gamma-glutamylglutamate	Sex	0.15	0.699	0.721329
gamma-glutamylglutamate	Sex*Line	0.77	0.8336	1
gamma-glutamylglutamine	Line	10.75	<.0001	1.0538e-10
gamma-glutamylglutamine	Sex	112	<.0001	1.0885e-12
gamma-glutamylglutamine	Sex*Line	0.78	0.8212	1
gamma-glutamylhistidine	Line	6.45	<.0001	1.28297e-07
gamma-glutamylhistidine	Sex	3.88	0.0561	0.0656604
gamma-glutamylhistidine	Sex*Line	0.85	0.7197	0.970268
gamma-glutamylisoleucine*	Line	2.36	0.0044	0.00604105
gamma-glutamylisoleucine*	Sex	3.77	0.0594	0.0692941
gamma-glutamylisoleucine*	Sex*Line	1.35	0.1045	0.230959
gamma-glutamylleucine	Line	2.51	0.0025	0.00360474
gamma-glutamylleucine	Sex	129.7	<.0001	1.3417e-13
gamma-glutamylleucine	Sex*Line	1.59	0.0251	0.0646508
gamma-glutamylmethionine	Line	8.03	<.0001	7.66578e-09
gamma-glutamylmethionine	Sex	12.61	0.001	0.00137406
gamma-glutamylmethionine	Sex*Line	1.09	0.3436	0.615201
gamma-tocopherol/beta-tocopherol	Line	27.43	<.0001	6.2898e-17
gamma-tocopherol/beta-tocopherol	Sex	2.71	0.1074	0.122295
gamma-tocopherol/beta-tocopherol	Sex*Line	1.19	0.2226	0.430857
gluconate	Line	6.36	<.0001	1.51834e-07
gluconate	Sex	84.82	<.0001	5.0946e-11
gluconate	Sex*Line	0.51	0.9928	1
glucosamine-6-phosphate	Line	6.9	<.0001	5.59144e-08
glucosamine-6-phosphate	Sex	2.34	0.1344	0.1511
glucosamine-6-phosphate	Sex*Line	0.91	0.6272	0.8935
glucose	Line	5.96	<.0001	3.51557e-07
glucose	Sex	42.42	<.0001	1.69806e-07
glucose	Sex*Line	2.29	0.0002	0.00079699
glucose 1-phosphate	Line	6.47	<.0001	1.24391e-07
glucose 1-phosphate	Sex	1.54	0.2221	0.2413
glucose 1-phosphate	Sex*Line	1.02	0.4517	0.730713
glucose 6-phosphate	Line	6.92	<.0001	5.37067e-08
glucose 6-phosphate	Sex	15.69	0.0003	0.00043472
glucose 6-phosphate	Sex*Line	1.1	0.3398	0.610836
glucuronate	Line	3.18	0.0002	0.00044438
glucuronate	Sex	139.35	<.0001	4.6406e-14
glucuronate	Sex*Line	1.51	0.0406	0.100382
glutamate	Line	5.08	<.0001	2.56159e-06
glutamate	Sex	23.05	<.0001	3.47531e-05
glutamate	Sex*Line	0.63	0.9523	1
glutamate, gamma-methyl ester	Line	3.64	<.0001	0.00011462
glutamate, gamma-methyl ester	Sex	0.8	0.3761	0.40085
glutamate, gamma-methyl ester	Sex*Line	0.71	0.896	1
glutamine	Line	5.06	<.0001	2.65835e-06
glutamine	Sex	49.58	<.0001	3.28746e-08
glutamine	Sex*Line	1.75	0.0089	0.0258681
glutaminylleucine	Line	2.84	0.0008	0.00121714
glutaminylleucine	Sex	364.86	<.0001	8.6217e-21
glutaminylleucine	Sex*Line	2.18	0.0004	0.00160551
glutarate (pentanedioate)	Line	6.7	<.0001	8.26689e-08
glutarate (pentanedioate)	Sex	0.36	0.5515	0.579671
glutarate (pentanedioate)	Sex*Line	0.77	0.8241	1
glycerate	Line	4	<.0001	4.12845e-05
glycerate	Sex	24.81	<.0001	2.00335e-05
glycerate	Sex*Line	2.22	0.0003	0.00119766
glycerol	Line	4.14	<.0001	2.89361e-05
glycerol	Sex	313.35	<.0001	1.0876e-19
glycerol	Sex*Line	1.97	0.0018	0.00644893
glycerol 2-phosphate	Line	1	0.5	0.51233
glycerol 2-phosphate	Sex	353.46	<.0001	1.4704e-20
glycerol 2-phosphate	Sex*Line	2.08	0.0008	0.00307286
glycerol 3-phosphate	Line	1.35	0.1791	0.199888
glycerol 3-phosphate	Sex	132.08	<.0001	1.024e-13
glycerol 3-phosphate	Sex*Line	3.24	<.0001	9.28172e-07
glycerophosphoethanolamine	Line	0.99	0.5156	0.524869
glycerophosphoethanolamine	Sex	602.55	<.0001	1.4634e-24
glycerophosphoethanolamine	Sex*Line	4.16	<.0001	1.26e-09
glycerophosphoglycerol	Line	2.04	0.0143	0.0180605
glycerophosphoglycerol	Sex	1006.56	<.0001	1.4716e-28
glycerophosphoglycerol	Sex*Line	3.03	<.0001	3.92753e-06
glycerophosphoinositol*	Line	1.04	0.4507	0.470468
glycerophosphoinositol*	Sex	1240.1	<.0001	3.2231e-30
glycerophosphoinositol*	Sex*Line	4.33	<.0001	3.8611e-10
glycerophosphorylcholine (GPC)	Line	1.11	0.3685	0.390043
glycerophosphorylcholine (GPC)	Sex	628.93	<.0001	6.9267e-25
glycerophosphorylcholine (GPC)	Sex*Line	4.64	<.0001	4.6153e-11
glycine	Line	2.6	0.0018	0.00267378
glycine	Sex	26.51	<.0001	1.204e-05
glycine	Sex*Line	0.51	0.9918	1
glycosyl-N-palmitoyl-sphingosine	Line	3.53	<.0001	0.00015752
glycosyl-N-palmitoyl-sphingosine	Sex	8.66	0.0054	0.00691501
glycosyl-N-palmitoyl-sphingosine	Sex*Line	2.62	<.0001	7.41279e-05
glycosyl-N-stearoyl-sphingosine	Line	4.28	<.0001	2.00033e-05
glycosyl-N-stearoyl-sphingosine	Sex	54.77	<.0001	1.08447e-08
glycosyl-N-stearoyl-sphingosine	Sex*Line	1.89	0.0033	0.0105733
glycylisoleucine	Line	3.81	<.0001	6.93263e-05
glycylisoleucine	Sex	486.72	<.0001	6.0011e-23
glycylisoleucine	Sex*Line	2.9	<.0001	9.72482e-06
glycylleucine	Line	6.36	<.0001	1.51834e-07
glycylleucine	Sex	1012.64	<.0001	1.3381e-28
glycylleucine	Sex*Line	2.37	<.0001	0.0004382
glycylvaline	Line	5.72	<.0001	5.75745e-07
glycylvaline	Sex	1135.99	<.0001	1.6248e-29
glycylvaline	Sex*Line	1.95	0.0021	0.00718983
guanine	Line	3.38	0.0001	0.00024126
guanine	Sex	181.41	<.0001	8.5321e-16
guanine	Sex*Line	0.68	0.9208	1
guanosine	Line	2.51	0.0025	0.00367362
guanosine	Sex	244.53	<.0001	6.9337e-18
guanosine	Sex*Line	0.51	0.9921	1
guanosine 3'-monophosphate (3'-GMP)	Line	6.14	<.0001	2.38899e-07
guanosine 3'-monophosphate (3'-GMP)	Sex	456.28	<.0001	1.8262e-22
guanosine 3'-monophosphate (3'-GMP)	Sex*Line	1.23	0.1907	0.375657
guanosine-2',3'-cyclic monophosphate	Line	3.13	0.0003	0.00050136
guanosine-2',3'-cyclic monophosphate	Sex	630.61	<.0001	6.6856e-25
guanosine-2',3'-cyclic monophosphate	Sex*Line	0.82	0.7668	0.998103
gulonic acid*	Line	2.83	0.0008	0.00125233
gulonic acid*	Sex	8.98	0.0047	0.0060403
gulonic acid*	Sex*Line	1.05	0.4056	0.678572
heme	Line	2.71	0.0012	0.00186508
heme	Sex	99.57	<.0001	5.7317e-12
heme	Sex*Line	1.14	0.2777	0.519867
hexanoylglycine	Line	3.34	0.0001	0.00026665
hexanoylglycine	Sex	5.35	0.026	0.0313499
hexanoylglycine	Sex*Line	1.29	0.1366	0.285065
hippurate	Line	5.42	<.0001	1.13866e-06
hippurate	Sex	2.84	0.0999	0.114238
hippurate	Sex*Line	0.58	0.9758	1
histamine	Line	10.33	<.0001	1.9837e-10
histamine	Sex	160.31	<.0001	5.7087e-15
histamine	Sex*Line	1.68	0.014	0.0385702
histidine	Line	14.75	<.0001	1.4913e-12
histidine	Sex	49.14	<.0001	3.60555e-08
histidine	Sex*Line	0.99	0.488	0.76229
homoserine lactone	Line	0.7	0.8604	0.862331
homoserine lactone	Sex	152.48	<.0001	1.2172e-14
homoserine lactone	Sex*Line	1.14	0.2773	0.519867
hypoxanthine	Line	2.01	0.0161	0.0199616
hypoxanthine	Sex	55.85	<.0001	8.68834e-09
hypoxanthine	Sex*Line	3.26	<.0001	8.28424e-07
inosine	Line	8.26	<.0001	5.32155e-09
inosine	Sex	0.06	0.8125	0.827131
inosine	Sex*Line	0.14	1	1
inositol 1-phosphate (I1P)	Line	1.42	0.1391	0.156327
inositol 1-phosphate (I1P)	Sex	0	0.9641	0.966218
inositol 1-phosphate (I1P)	Sex*Line	3.07	<.0001	2.95658e-06
Isobar: fructose 1,6-diphosphate, glucose 1,6-dipho	Line	4.65	<.0001	7.5656e-06
Isobar: fructose 1,6-diphosphate, glucose 1,6-dipho	Sex	18.02	0.0001	0.00018877
Isobar: fructose 1,6-diphosphate, glucose 1,6-dipho	Sex*Line	0.82	0.7591	0.998103
isobutyrylcarnitine	Line	5.3	<.0001	1.53982e-06
isobutyrylcarnitine	Sex	38.26	<.0001	4.72641e-07
isobutyrylcarnitine	Sex*Line	1	0.4754	0.747867
isoleucine	Line	3.09	0.0003	0.00057538
isoleucine	Sex	808.13	<.0001	8.2188e-27
isoleucine	Sex*Line	0.98	0.5161	0.795272
isoleucylglycine	Line	3.8	<.0001	7.133e-05
isoleucylglycine	Sex	586.54	<.0001	2.308e-24
isoleucylglycine	Sex*Line	1.85	0.0042	0.0133941
isomaltose	Line	8.17	<.0001	6.16319e-09
isomaltose	Sex	356.4	<.0001	1.2818e-20
isomaltose	Sex*Line	2.15	0.0005	0.0019505
isoxanthopterin	Line	7.34	<.0001	2.54801e-08
isoxanthopterin	Sex	1342.88	<.0001	8.2942e-31
isoxanthopterin	Sex*Line	8.49	<.0001	2.9793e-21
kojibiose	Line	5.28	<.0001	1.57291e-06
kojibiose	Sex	134.7	<.0001	7.6781e-14
kojibiose	Sex*Line	1.64	0.018	0.0475328
kynurenate	Line	62.72	<.0001	1.9624e-23
kynurenate	Sex	371.34	<.0001	6.3736e-21
kynurenate	Sex*Line	1.94	0.0023	0.00777025
kynurenine	Line	7.31	<.0001	2.60429e-08
kynurenine	Sex	455.39	<.0001	1.8538e-22
kynurenine	Sex*Line	1.85	0.0042	0.0133941
lactate	Line	2.9	0.0006	0.00100924
lactate	Sex	17.39	0.0002	0.00023446
lactate	Sex*Line	2.24	0.0003	0.00112984
lactosyl-N-palmitoyl-sphingosine	Line	5.91	<.0001	3.80758e-07
lactosyl-N-palmitoyl-sphingosine	Sex	11.69	0.0015	0.00197691
lactosyl-N-palmitoyl-sphingosine	Sex*Line	0.98	0.5045	0.784814
lanthionine	Line	2.1	0.0113	0.014616
lanthionine	Sex	91.82	<.0001	1.7556e-11
lanthionine	Sex*Line	0.66	0.9362	1
laurate (12:0)	Line	3.71	<.0001	9.224e-05
laurate (12:0)	Sex	3.14	0.0842	0.0971092
laurate (12:0)	Sex*Line	4.67	<.0001	4.1651e-11
leucine	Line	5.15	<.0001	2.18764e-06
leucine	Sex	1276.07	<.0001	1.9142e-30
leucine	Sex*Line	2.14	0.0005	0.00204934
leucylalanine	Line	2.84	0.0008	0.00121714
leucylalanine	Sex	72.28	<.0001	3.9555e-10
leucylalanine	Sex*Line	1.2	0.2129	0.417539
leucylglutamine*	Line	3.44	<.0001	0.00020441
leucylglutamine*	Sex	115.2	<.0001	7.3413e-13
leucylglutamine*	Sex*Line	1.17	0.2441	0.46859
leucylglycine	Line	2.98	0.0005	0.00080261
leucylglycine	Sex	209.46	<.0001	8.8286e-17
leucylglycine	Sex*Line	1	0.4755	0.747867
linoleate (18:2n6)	Line	2.01	0.016	0.0199616
linoleate (18:2n6)	Sex	36.25	<.0001	7.92523e-07
linoleate (18:2n6)	Sex*Line	0.81	0.7729	0.998383
linolenate [alpha or gamma; (18:3n3 or 6)]	Line	3.62	<.0001	0.00011794
linolenate [alpha or gamma; (18:3n3 or 6)]	Sex	341.16	<.0001	2.6932e-20
linolenate [alpha or gamma; (18:3n3 or 6)]	Sex*Line	0.58	0.9768	1
linoleoylcarnitine*	Line	10.03	<.0001	3.0293e-10
linoleoylcarnitine*	Sex	1.42	0.2405	0.260609
linoleoylcarnitine*	Sex*Line	1.67	0.0146	0.0400235
lysine	Line	3.63	<.0001	0.00011751
lysine	Sex	1316.82	<.0001	1.149e-30
lysine	Sex*Line	1.51	0.0418	0.101699
lysylleucine	Line	5.56	<.0001	8.06652e-07
lysylleucine	Sex	574.91	<.0001	3.211e-24
lysylleucine	Sex*Line	0.76	0.8449	1
malate	Line	12.23	<.0001	1.6283e-11
malate	Sex	14.09	0.0006	0.00077943
malate	Sex*Line	0.06	1	1
malonate	Line	2.97	0.0005	0.00081344
malonate	Sex	2.35	0.133	0.150233
malonate	Sex*Line	0.79	0.7999	1
maltopentaose	Line	8.03	<.0001	7.66578e-09
maltopentaose	Sex	30.03	<.0001	4.28112e-06
maltopentaose	Sex*Line	1.3	0.1349	0.282888
maltose	Line	9.94	<.0001	3.4641e-10
maltose	Sex	0.91	0.3469	0.373318
maltose	Sex*Line	1.69	0.0131	0.0369884
maltotetraose	Line	5.63	<.0001	7.06078e-07
maltotetraose	Sex	2.16	0.1494	0.16671
maltotetraose	Sex*Line	1.31	0.1261	0.266832
maltotriose	Line	8.57	<.0001	3.08847e-09
maltotriose	Sex	30.83	<.0001	3.41985e-06
maltotriose	Sex*Line	0.58	0.9762	1
mannitol/sorbitol	Line	3.82	<.0001	6.82882e-05
mannitol/sorbitol	Sex	113.14	<.0001	9.4686e-13
mannitol/sorbitol	Sex*Line	1.45	0.0573	0.133833
mannose	Line	7.7	<.0001	1.34059e-08
mannose	Sex	497.09	<.0001	4.1864e-23
mannose	Sex*Line	0.62	0.9613	1
mannose-6-phosphate	Line	6.52	<.0001	1.15447e-07
mannose-6-phosphate	Sex	5.56	0.0235	0.0286638
mannose-6-phosphate	Sex*Line	1.12	0.3125	0.575384
margarate (17:0)	Line	2.12	0.0105	0.0137865
margarate (17:0)	Sex	0.62	0.435	0.461527
margarate (17:0)	Sex*Line	0.82	0.7665	0.998103
mesaconate (methylfumarate)	Line	2.93	0.0006	0.00092487
mesaconate (methylfumarate)	Sex	0.16	0.6906	0.714302
mesaconate (methylfumarate)	Sex*Line	1.26	0.161	0.32567
methionine	Line	3.23	0.0002	0.00037285
methionine	Sex	1002.1	<.0001	1.5717e-28
methionine	Sex*Line	3.03	<.0001	3.92753e-06
methionine sulfone	Line	5.29	<.0001	1.55e-06
methionine sulfone	Sex	75.9	<.0001	2.1302e-10
methionine sulfone	Sex*Line	0.93	0.5997	0.867925
methionine sulfoxide	Line	3.05	0.0004	0.00064735
methionine sulfoxide	Sex	126.14	<.0001	2.0063e-13
methionine sulfoxide	Sex*Line	14.69	<.0001	1.0623e-33
methyl glucopyranoside (alpha + beta)	Line	3.83	<.0001	6.5276e-05
methyl glucopyranoside (alpha + beta)	Sex	0.73	0.397	0.422181
methyl glucopyranoside (alpha + beta)	Sex*Line	0.64	0.9488	1
methyl-4-hydroxybenzoate	Line	5.66	<.0001	6.60169e-07
methyl-4-hydroxybenzoate	Sex	15.07	0.0004	0.00054096
methyl-4-hydroxybenzoate	Sex*Line	0.71	0.8911	1
methylmalonate (MMA)	Line	13.96	<.0001	2.7834e-12
methylmalonate (MMA)	Sex	4.65	0.0373	0.0446915
methylmalonate (MMA)	Sex*Line	0.47	0.9968	1
methylphosphate	Line	4.33	<.0001	1.724e-05
methylphosphate	Sex	49.24	<.0001	3.54078e-08
methylphosphate	Sex*Line	0.66	0.9323	1
methylsuccinate	Line	3	0.0004	0.00073971
methylsuccinate	Sex	2.97	0.0927	0.106609
methylsuccinate	Sex*Line	0.92	0.6157	0.879788
mevalonate	Line	3.43	0.0001	0.00020958
mevalonate	Sex	3799.57	<.0001	2.6253e-38
mevalonate	Sex*Line	1.04	0.4193	0.695566
mevalonate 5-phosphate	Line	1	0.5	0.51233
mevalonate 5-phosphate	Sex	578.84	<.0001	2.8688e-24
mevalonate 5-phosphate	Sex*Line	6.25	<.0001	1.3637e-15
mevalonolactone	Line	2.08	0.0124	0.0157201
mevalonolactone	Sex	1940.83	<.0001	1.1434e-33
mevalonolactone	Sex*Line	1.39	0.0823	0.189155
myo-inositol	Line	1.11	0.3756	0.395729
myo-inositol	Sex	568.47	<.0001	3.8545e-24
myo-inositol	Sex*Line	6.7	<.0001	9.2624e-17
myristate (14:0)	Line	2.13	0.0103	0.0135546
myristate (14:0)	Sex	163.8	<.0001	4.1096e-15
myristate (14:0)	Sex*Line	1.92	0.0026	0.00867318
myristoleate (14:1n5)	Line	3.25	0.0002	0.00035665
myristoleate (14:1n5)	Sex	72.95	<.0001	3.5275e-10
myristoleate (14:1n5)	Sex*Line	4.47	<.0001	1.477e-10
myristoylcarnitine	Line	13.53	<.0001	4.1009e-12
myristoylcarnitine	Sex	26.24	<.0001	1.29942e-05
myristoylcarnitine	Sex*Line	2.03	0.0012	0.00420426
N1-methyladenosine	Line	17.69	<.0001	8.7777e-14
N1-methyladenosine	Sex	169.93	<.0001	2.3321e-15
N1-methyladenosine	Sex*Line	1.94	0.0023	0.00777025
N1-methylinosine	Line	1.74	0.0436	0.0515665
N1-methylinosine	Sex	0.37	0.5456	0.574737
N1-methylinosine	Sex*Line	0.87	0.6819	0.944702
N2,N2-dimethylguanine	Line	2.94	0.0005	0.00089508
N2,N2-dimethylguanine	Sex	407.03	<.0001	1.3019e-21
N2,N2-dimethylguanine	Sex*Line	5.17	<.0001	1.7727e-12
N2,N2-dimethylguanosine	Line	3.02	0.0004	0.00070345
N2,N2-dimethylguanosine	Sex	1.24	0.2727	0.294083
N2,N2-dimethylguanosine	Sex*Line	0.73	0.8758	1
N6,N6,N6-trimethyllysine	Line	11.61	<.0001	3.5282e-11
N6,N6,N6-trimethyllysine	Sex	1286.69	<.0001	1.7057e-30
N6,N6,N6-trimethyllysine	Sex*Line	1.92	0.0026	0.00867318
N6,N6-dimethyladenosine	Line	1.72	0.0464	0.0547121
N6,N6-dimethyladenosine	Sex	145.31	<.0001	2.49e-14
N6,N6-dimethyladenosine	Sex*Line	2.19	0.0004	0.00148577
N6-acetyllysine	Line	2.63	0.0016	0.00243106
N6-acetyllysine	Sex	869.5	<.0001	2.1695e-27
N6-acetyllysine	Sex*Line	0.7	0.9084	1
N6-carboxymethyllysine	Line	13.54	<.0001	4.1009e-12
N6-carboxymethyllysine	Sex	5.42	0.0252	0.0306567
N6-carboxymethyllysine	Sex*Line	1.07	0.3729	0.647182
N6-succinyladenosine	Line	2.03	0.0149	0.0187247
N6-succinyladenosine	Sex	13.45	0.0007	0.00099119
N6-succinyladenosine	Sex*Line	0.77	0.8313	1
N-acetyl-1-methylhistidine*	Line	2.17	0.0088	0.0116551
N-acetyl-1-methylhistidine*	Sex	2.52	0.1203	0.13619
N-acetyl-1-methylhistidine*	Sex*Line	0.74	0.8681	1
N-acetylalanine	Line	3.89	<.0001	5.58e-05
N-acetylalanine	Sex	671.29	<.0001	2.2023e-25
N-acetylalanine	Sex*Line	4	<.0001	4.25013e-09
N-acetylarginine	Line	11.05	<.0001	7.0876e-11
N-acetylarginine	Sex	114.78	<.0001	7.7113e-13
N-acetylarginine	Sex*Line	0.6	0.9666	1
N-acetylasparagine	Line	3.51	<.0001	0.00016355
N-acetylasparagine	Sex	3.55	0.0671	0.0781117
N-acetylasparagine	Sex*Line	0.93	0.5864	0.856849
N-acetylaspartate (NAA)	Line	11.19	<.0001	6.022e-11
N-acetylaspartate (NAA)	Sex	0.03	0.8647	0.876346
N-acetylaspartate (NAA)	Sex*Line	1.01	0.4693	0.743273
N-acetyl-beta-alanine	Line	14.61	<.0001	1.6506e-12
N-acetyl-beta-alanine	Sex	112.42	<.0001	1.0344e-12
N-acetyl-beta-alanine	Sex*Line	1.92	0.0026	0.00867318
N-acetylcysteine	Line	1.91	0.0229	0.0279451
N-acetylcysteine	Sex	12.31	0.0012	0.00154587
N-acetylcysteine	Sex*Line	0.97	0.5277	0.807567
N-acetyl-glucosamine 1-phosphate	Line	6.37	<.0001	1.49568e-07
N-acetyl-glucosamine 1-phosphate	Sex	8.76	0.0052	0.00662782
N-acetyl-glucosamine 1-phosphate	Sex*Line	2.61	<.0001	7.80433e-05
N-acetylglucosamine 6-phosphate	Line	3.64	<.0001	0.00011363
N-acetylglucosamine 6-phosphate	Sex	406.91	<.0001	1.3019e-21
N-acetylglucosamine 6-phosphate	Sex*Line	1.79	0.0065	0.0201202
N-acetylglucosamine/N-acetylgalactosamine	Line	6.24	<.0001	1.96186e-07
N-acetylglucosamine/N-acetylgalactosamine	Sex	168.16	<.0001	2.7387e-15
N-acetylglucosamine/N-acetylgalactosamine	Sex*Line	1.07	0.3679	0.646033
N-acetylglutamate	Line	5.55	<.0001	8.37627e-07
N-acetylglutamate	Sex	22.01	<.0001	4.851e-05
N-acetylglutamate	Sex*Line	1.07	0.38	0.654456
N-acetylglutamine	Line	2.22	0.0072	0.0096423
N-acetylglutamine	Sex	5.64	0.0226	0.0276925
N-acetylglutamine	Sex*Line	2.83	<.0001	1.65366e-05
N-acetylglycine	Line	1.15	0.3355	0.358962
N-acetylglycine	Sex	5.37	0.0258	0.0311465
N-acetylglycine	Sex*Line	1.08	0.3673	0.646033
N-acetylhistamine	Line	3.18	0.0002	0.00044438
N-acetylhistamine	Sex	3699.76	<.0001	3.2915e-38
N-acetylhistamine	Sex*Line	2.83	<.0001	1.65366e-05
N-acetylhistidine	Line	3.17	0.0002	0.00045512
N-acetylhistidine	Sex	19.1	<.0001	0.00012934
N-acetylhistidine	Sex*Line	2.4	<.0001	0.00035147
N-acetylleucine	Line	2.65	0.0015	0.00224329
N-acetylleucine	Sex	278.7	<.0001	7.8145e-19
N-acetylleucine	Sex*Line	1.59	0.0239	0.0622869
N-acetylmethionine	Line	0.43	0.9951	0.995117
N-acetylmethionine	Sex	56.7	<.0001	7.38668e-09
N-acetylmethionine	Sex*Line	1.49	0.0466	0.112206
N-acetylmethionine sulfoxide	Line	3.33	0.0001	0.00027733
N-acetylmethionine sulfoxide	Sex	316.36	<.0001	9.5045e-20
N-acetylmethionine sulfoxide	Sex*Line	4.73	<.0001	2.7806e-11
N-acetylphenylalanine	Line	3.41	0.0001	0.00021888
N-acetylphenylalanine	Sex	186.43	<.0001	5.5572e-16
N-acetylphenylalanine	Sex*Line	0.84	0.7344	0.979507
N-acetylputrescine	Line	1	0.4943	0.51233
N-acetylputrescine	Sex	146.17	<.0001	2.284e-14
N-acetylputrescine	Sex*Line	2.42	<.0001	0.00032766
N-acetylserine	Line	3.34	0.0001	0.00026974
N-acetylserine	Sex	315.38	<.0001	9.8712e-20
N-acetylserine	Sex*Line	2.67	<.0001	5.40285e-05
N-acetyltaurine	Line	5.78	<.0001	5.09952e-07
N-acetyltaurine	Sex	28.63	<.0001	6.43389e-06
N-acetyltaurine	Sex*Line	1.38	0.0865	0.197789
N-acetylthreonine	Line	3.99	<.0001	4.25168e-05
N-acetylthreonine	Sex	178.22	<.0001	1.1214e-15
N-acetylthreonine	Sex*Line	1.04	0.4207	0.695566
N-acetylvaline	Line	4.86	<.0001	4.44668e-06
N-acetylvaline	Sex	283.86	<.0001	5.742e-19
N-acetylvaline	Sex*Line	1.16	0.2558	0.486916
N-alpha-acetylornithine	Line	4.19	<.0001	2.52523e-05
N-alpha-acetylornithine	Sex	4.43	0.0419	0.0497724
N-alpha-acetylornithine	Sex*Line	0.42	0.9991	1
N-delta-acetylornithine	Line	9.73	<.0001	4.7726e-10
N-delta-acetylornithine	Sex	1.91	0.1748	0.193647
N-delta-acetylornithine	Sex*Line	0.55	0.9842	1
nicotinamide	Line	4.4	<.0001	1.436e-05
nicotinamide	Sex	6.69	0.0136	0.0166856
nicotinamide	Sex*Line	0.41	0.9992	1
nicotinamide ribonucleotide (NMN)	Line	11.88	<.0001	2.563e-11
nicotinamide ribonucleotide (NMN)	Sex	0.35	0.5571	0.584214
nicotinamide ribonucleotide (NMN)	Sex*Line	1.36	0.0968	0.21503
nicotinamide riboside	Line	2.96	0.0005	0.00083769
nicotinamide riboside	Sex	20.81	<.0001	7.238e-05
nicotinamide riboside	Sex*Line	0.6	0.9699	1
nicotinate	Line	2.91	0.0006	0.00099972
nicotinate	Sex	146.79	<.0001	2.15e-14
nicotinate	Sex*Line	0.88	0.6699	0.936676
nicotinate ribonucleoside	Line	1.83	0.031	0.0372973
nicotinate ribonucleoside	Sex	4.38	0.0429	0.0509001
nicotinate ribonucleoside	Sex*Line	1.36	0.0948	0.213064
N-methylalanine	Line	3.11	0.0003	0.00054119
N-methylalanine	Sex	14.98	0.0004	0.00055759
N-methylalanine	Sex*Line	0.95	0.5645	0.841135
N-monomethylarginine	Line	3.46	<.0001	0.00019413
N-monomethylarginine	Sex	226.05	<.0001	2.5234e-17
N-monomethylarginine	Sex*Line	3.29	<.0001	6.43868e-07
nonadecanoate (19:0)	Line	1.77	0.0397	0.0473662
nonadecanoate (19:0)	Sex	2.93	0.095	0.109005
nonadecanoate (19:0)	Sex*Line	1.54	0.0335	0.0838374
N-palmitoyl-sphinganine (d18:0/16:0)	Line	6.56	<.0001	1.0812e-07
N-palmitoyl-sphinganine (d18:0/16:0)	Sex	125.39	<.0001	2.1802e-13
N-palmitoyl-sphinganine (d18:0/16:0)	Sex*Line	1.68	0.0135	0.0377227
N-palmitoyl-sphingosine (d18:1/16:0)	Line	2.76	0.001	0.00157658
N-palmitoyl-sphingosine (d18:1/16:0)	Sex	500.55	<.0001	3.7331e-23
N-palmitoyl-sphingosine (d18:1/16:0)	Sex*Line	2.13	0.0006	0.00224013
oleate/vaccenate (18:1)	Line	1.8	0.0351	0.0420519
oleate/vaccenate (18:1)	Sex	0.11	0.7471	0.769214
oleate/vaccenate (18:1)	Sex*Line	0.92	0.6091	0.8788
oleoylcarnitine	Line	3.87	<.0001	5.97939e-05
oleoylcarnitine	Sex	77.34	<.0001	1.6879e-10
oleoylcarnitine	Sex*Line	1.11	0.325	0.593602
oleoylcholine	Line	2.34	0.0046	0.00637424
oleoylcholine	Sex	60.92	<.0001	3.17874e-09
oleoylcholine	Sex*Line	0.93	0.589	0.857168
ornithine	Line	4.48	<.0001	1.18054e-05
ornithine	Sex	0.06	0.811	0.827131
ornithine	Sex*Line	1.53	0.0369	0.0917706
orotate	Line	3.16	0.0003	0.00047203
orotate	Sex	80.08	<.0001	1.081e-10
orotate	Sex*Line	2.48	<.0001	0.00020725
O-sulfo-L-tyrosine	Line	1.29	0.2148	0.237372
O-sulfo-L-tyrosine	Sex	374.32	<.0001	5.5836e-21
O-sulfo-L-tyrosine	Sex*Line	2.85	<.0001	1.421e-05
oxalate (ethanedioate)	Line	2.41	0.0035	0.00498823
oxalate (ethanedioate)	Sex	1.54	0.2217	0.2413
oxalate (ethanedioate)	Sex*Line	1.07	0.3717	0.647182
oxaloacetate	Line	0.93	0.5875	0.595368
oxaloacetate	Sex	0.01	0.9391	0.943272
oxaloacetate	Sex*Line	0.93	0.5846	0.856849
palmitate (16:0)	Line	2.11	0.0111	0.0144455
palmitate (16:0)	Sex	12.43	0.0011	0.00147463
palmitate (16:0)	Sex*Line	0.97	0.5327	0.809823
palmitoleate (16:1n7)	Line	2.1	0.0114	0.014752
palmitoleate (16:1n7)	Sex	155.17	<.0001	9.3133e-15
palmitoleate (16:1n7)	Sex*Line	0.81	0.7807	1
palmitoleoylcarnitine*	Line	12.58	<.0001	1.1571e-11
palmitoleoylcarnitine*	Sex	20.41	<.0001	8.28148e-05
palmitoleoylcarnitine*	Sex*Line	2.1	0.0007	0.00273579
palmitoloelycholine	Line	2.86	0.0007	0.00115836
palmitoloelycholine	Sex	204.26	<.0001	1.3182e-16
palmitoloelycholine	Sex*Line	1.83	0.0051	0.0160717
palmitoylcarnitine	Line	3.64	<.0001	0.00011462
palmitoylcarnitine	Sex	6.86	0.0125	0.0153911
palmitoylcarnitine	Sex*Line	1.33	0.1107	0.238901
palmitoylcholine	Line	2.46	0.003	0.00435301
palmitoylcholine	Sex	8.61	0.0056	0.00704252
palmitoylcholine	Sex*Line	1.24	0.183	0.363609
panose	Line	12.63	<.0001	1.1133e-11
panose	Sex	199.08	<.0001	1.9702e-16
panose	Sex*Line	1.66	0.0156	0.0417611
pantethine	Line	3.14	0.0003	0.00048653
pantethine	Sex	55.84	<.0001	8.68834e-09
pantethine	Sex*Line	1.66	0.0154	0.0416951
pantothenate	Line	4.98	<.0001	3.2886e-06
pantothenate	Sex	90.19	<.0001	2.2354e-11
pantothenate	Sex*Line	5.12	<.0001	2.2631e-12
pentadecanoate (15:0)	Line	2.08	0.0123	0.0156408
pentadecanoate (15:0)	Sex	5.04	0.0306	0.0367107
pentadecanoate (15:0)	Sex*Line	0.86	0.7003	0.955554
phenylalanine	Line	6.48	<.0001	1.22475e-07
phenylalanine	Sex	1568.27	<.0001	5.1942e-32
phenylalanine	Sex*Line	1.24	0.1799	0.359079
phenylalanylalanine	Line	2.18	0.0085	0.0113569
phenylalanylalanine	Sex	194.91	<.0001	2.7303e-16
phenylalanylalanine	Sex*Line	0.97	0.5327	0.809823
phenylalanylglycine	Line	2.43	0.0033	0.00472623
phenylalanylglycine	Sex	115.99	<.0001	6.6757e-13
phenylalanylglycine	Sex*Line	1.68	0.0137	0.0381999
phenyllactate (PLA)	Line	6.18	<.0001	2.21463e-07
phenyllactate (PLA)	Sex	11.74	0.0015	0.00194729
phenyllactate (PLA)	Sex*Line	0.96	0.5374	0.811539
phosphate	Line	3.31	0.0002	0.00029104
phosphate	Sex	157.32	<.0001	7.587e-15
phosphate	Sex*Line	0.65	0.9445	1
phosphoenolpyruvate (PEP)	Line	2.9	0.0006	0.00100399
phosphoenolpyruvate (PEP)	Sex	229.33	<.0001	1.9964e-17
phosphoenolpyruvate (PEP)	Sex*Line	1.66	0.0156	0.0417611
phosphoethanolamine	Line	13.3	<.0001	5.2257e-12
phosphoethanolamine	Sex	0.06	0.8026	0.820757
phosphoethanolamine	Sex*Line	4.61	<.0001	5.4528e-11
phosphopantetheine	Line	1.56	0.084	0.0965622
phosphopantetheine	Sex	54.34	<.0001	1.18262e-08
phosphopantetheine	Sex*Line	1.05	0.4054	0.678572
phosphothreonine	Line	3.83	<.0001	6.54181e-05
phosphothreonine	Sex	16.92	0.0002	0.00027683
phosphothreonine	Sex*Line	0.89	0.6596	0.927903
phytosphingosine	Line	5.77	<.0001	5.17502e-07
phytosphingosine	Sex	327.07	<.0001	5.541e-20
phytosphingosine	Sex*Line	1.07	0.3755	0.649283
pipecolate	Line	94.92	<.0001	1.4807e-26
pipecolate	Sex	11.02	0.002	0.00258683
pipecolate	Sex*Line	1.13	0.2974	0.552145
proline	Line	6.4	<.0001	1.41915e-07
proline	Sex	0.85	0.3623	0.387284
proline	Sex*Line	2.14	0.0005	0.00213229
prolylglycine	Line	7.31	<.0001	2.60429e-08
prolylglycine	Sex	783.5	<.0001	1.3722e-26
prolylglycine	Sex*Line	1.74	0.0092	0.026713
propionylcarnitine	Line	9.23	<.0001	1.03959e-09
propionylcarnitine	Sex	35.65	<.0001	9.23446e-07
propionylcarnitine	Sex*Line	1.76	0.0083	0.0249515
propionylglycine	Line	15.56	<.0001	6.433e-13
propionylglycine	Sex	1.97	0.1686	0.18717
propionylglycine	Sex*Line	0.47	0.9967	1
pseudouridine	Line	4.11	<.0001	3.15565e-05
pseudouridine	Sex	182.15	<.0001	8.0404e-16
pseudouridine	Sex*Line	2.19	0.0004	0.00148577
pterin	Line	14.49	<.0001	1.7997e-12
pterin	Sex	63.76	<.0001	1.85701e-09
pterin	Sex*Line	4.93	<.0001	7.3118e-12
putrescine	Line	2.55	0.0022	0.00316378
putrescine	Sex	449.39	<.0001	2.3299e-22
putrescine	Sex*Line	7.04	<.0001	1.2425e-17
pyridoxal	Line	1.94	0.0204	0.0250877
pyridoxal	Sex	40.11	<.0001	2.9862e-07
pyridoxal	Sex*Line	1.58	0.0269	0.0688027
pyridoxamine	Line	3.1	0.0003	0.00055772
pyridoxamine	Sex	35.2	<.0001	1.03793e-06
pyridoxamine	Sex*Line	0.87	0.6848	0.944702
pyridoxate	Line	2.43	0.0033	0.00472623
pyridoxate	Sex	9.35	0.004	0.00512938
pyridoxate	Sex*Line	2.37	<.0001	0.00045425
pyroglutamine*	Line	4.89	<.0001	4.13864e-06
pyroglutamine*	Sex	0.28	0.5977	0.622479
pyroglutamine*	Sex*Line	0.94	0.5731	0.845682
pyruvate	Line	3.89	<.0001	5.58e-05
pyruvate	Sex	0.85	0.3625	0.387284
pyruvate	Sex*Line	0.92	0.6144	0.879788
quinate	Line	5.91	<.0001	3.80758e-07
quinate	Sex	0	0.9677	0.96774
quinate	Sex*Line	0.48	0.996	1
ribitol	Line	5.73	<.0001	5.7445e-07
ribitol	Sex	116.7	<.0001	6.1273e-13
ribitol	Sex*Line	1.75	0.0087	0.0256892
riboflavin (Vitamin B2)	Line	13.91	<.0001	2.7998e-12
riboflavin (Vitamin B2)	Sex	27.5	<.0001	8.96204e-06
riboflavin (Vitamin B2)	Sex*Line	0.57	0.9794	1
ribose	Line	4.15	<.0001	2.813e-05
ribose	Sex	22.72	<.0001	3.86674e-05
ribose	Sex*Line	2.15	0.0005	0.00196064
ribose 1-phosphate	Line	2.94	0.0005	0.00090664
ribose 1-phosphate	Sex	705.34	<.0001	9.3044e-26
ribose 1-phosphate	Sex*Line	0.83	0.7485	0.991545
ribose 5-phosphate	Line	6.52	<.0001	1.15447e-07
ribose 5-phosphate	Sex	13.86	0.0006	0.00084984
ribose 5-phosphate	Sex*Line	0.85	0.713	0.964108
ribulose/xylulose	Line	2.39	0.0039	0.00549788
ribulose/xylulose	Sex	1.83	0.184	0.20335
ribulose/xylulose	Sex*Line	1.71	0.0114	0.0323435
S-1-pyrroline-5-carboxylate	Line	2.68	0.0014	0.00205484
S-1-pyrroline-5-carboxylate	Sex	38.73	<.0001	4.2097e-07
S-1-pyrroline-5-carboxylate	Sex*Line	0.87	0.6923	0.95032
saccharopine	Line	1.24	0.2542	0.278775
saccharopine	Sex	17.31	0.0002	0.00024094
saccharopine	Sex*Line	1.01	0.4601	0.739156
S-adenosylhomocysteine (SAH)	Line	2.93	0.0005	0.00091488
S-adenosylhomocysteine (SAH)	Sex	13.63	0.0007	0.00092704
S-adenosylhomocysteine (SAH)	Sex*Line	2.02	0.0013	0.00457495
S-adenosylmethionine (SAM)	Line	2.51	0.0025	0.00358971
S-adenosylmethionine (SAM)	Sex	25.96	<.0001	1.408e-05
S-adenosylmethionine (SAM)	Sex*Line	5.03	<.0001	3.8091e-12
sarcosine	Line	4.1	<.0001	3.206e-05
sarcosine	Sex	83.95	<.0001	5.8268e-11
sarcosine	Sex*Line	6.14	<.0001	2.5923e-15
sedoheptulose	Line	5.59	<.0001	7.62883e-07
sedoheptulose	Sex	188.94	<.0001	4.5012e-16
sedoheptulose	Sex*Line	2.6	<.0001	8.56981e-05
sedoheptulose-7-phosphate	Line	4.62	<.0001	8.21057e-06
sedoheptulose-7-phosphate	Sex	15.21	0.0004	0.00051499
sedoheptulose-7-phosphate	Sex*Line	2.79	<.0001	2.26354e-05
sepiapterin	Line	3.22	0.0002	0.00038204
sepiapterin	Sex	385.54	<.0001	3.3385e-21
sepiapterin	Sex*Line	25.62	<.0001	1.1116e-48
serine	Line	3.81	<.0001	6.93263e-05
serine	Sex	563.99	<.0001	4.4033e-24
serine	Sex*Line	2.57	<.0001	0.0001033
spermidine	Line	1.2	0.2887	0.314348
spermidine	Sex	172.47	<.0001	1.8741e-15
spermidine	Sex*Line	3.13	<.0001	1.94105e-06
sphinganine	Line	4.59	<.0001	8.73735e-06
sphinganine	Sex	235.9	<.0001	1.252e-17
sphinganine	Sex*Line	0.52	0.9913	1
stachydrine	Line	7.34	<.0001	2.54801e-08
stachydrine	Sex	9.94	0.0031	0.00402405
stachydrine	Sex*Line	0.9	0.6422	0.906595
stearate (18:0)	Line	1.44	0.1316	0.148259
stearate (18:0)	Sex	8.62	0.0055	0.0070148
stearate (18:0)	Sex*Line	1.06	0.3935	0.672658
stearidonate (18:4n3)	Line	3.46	<.0001	0.00019277
stearidonate (18:4n3)	Sex	68.16	<.0001	8.197e-10
stearidonate (18:4n3)	Sex*Line	0.6	0.9684	1
stearoylcarnitine	Line	4.64	<.0001	7.70677e-06
stearoylcarnitine	Sex	26.29	<.0001	1.28543e-05
stearoylcarnitine	Sex*Line	0.86	0.7091	0.96181
succinate	Line	2.45	0.0031	0.00441127
succinate	Sex	46.73	<.0001	6.17691e-08
succinate	Sex*Line	1.34	0.1087	0.236685
succinimide	Line	2.81	0.0008	0.00130377
succinimide	Sex	9.56	0.0037	0.00472018
succinimide	Sex*Line	0.98	0.5059	0.784814
sucrose	Line	10.14	<.0001	2.594e-10
sucrose	Sex	79.34	<.0001	1.2162e-10
sucrose	Sex*Line	0.6	0.9672	1
sulfate*	Line	3.9	<.0001	5.51161e-05
sulfate*	Sex	81.95	<.0001	7.9843e-11
sulfate*	Sex*Line	0.24	1	1
taurine	Line	92.53	<.0001	1.6076e-26
taurine	Sex	420.24	<.0001	7.5323e-22
taurine	Sex*Line	2.96	<.0001	6.4316e-06
tetradecanedioate	Line	17.54	<.0001	9.342e-14
tetradecanedioate	Sex	1.56	0.2197	0.239808
tetradecanedioate	Sex*Line	1.1	0.3359	0.606203
thiamin (Vitamin B1)	Line	6.87	<.0001	5.78242e-08
thiamin (Vitamin B1)	Sex	195.14	<.0001	2.6951e-16
thiamin (Vitamin B1)	Sex*Line	1.03	0.4344	0.710351
thiamin monophosphate	Line	4.03	<.0001	3.87836e-05
thiamin monophosphate	Sex	0.18	0.6731	0.69778
thiamin monophosphate	Sex*Line	2.03	0.0012	0.00422114
thioproline	Line	1.56	0.0834	0.0961873
thioproline	Sex	324.32	<.0001	6.3683e-20
thioproline	Sex*Line	3.65	<.0001	5.08173e-08
threonate	Line	4.05	<.0001	3.649e-05
threonate	Sex	0.02	0.8809	0.888725
threonate	Sex*Line	0.7	0.9001	1
threonine	Line	4.49	<.0001	1.15079e-05
threonine	Sex	304.19	<.0001	1.7792e-19
threonine	Sex*Line	1.89	0.0032	0.010505
threonylphenylalanine	Line	2.45	0.0031	0.00440908
threonylphenylalanine	Sex	261.76	<.0001	2.2328e-18
threonylphenylalanine	Sex*Line	1.07	0.371	0.647182
thymidine	Line	2.95	0.0005	0.00086963
thymidine	Sex	494.74	<.0001	4.5123e-23
thymidine	Sex*Line	1.96	0.002	0.00682289
thymine	Line	3.41	0.0001	0.00021888
thymine	Sex	68.3	<.0001	8.0193e-10
thymine	Sex*Line	1.26	0.1662	0.33454
trans-4-hydroxyproline	Line	12.77	<.0001	9.6628e-12
trans-4-hydroxyproline	Sex	5.65	0.0225	0.0276104
trans-4-hydroxyproline	Sex*Line	1.04	0.4134	0.688567
tricarballylate	Line	6.55	<.0001	1.09488e-07
tricarballylate	Sex	4.27	0.0455	0.053634
tricarballylate	Sex*Line	1	0.4775	0.748508
trigonelline (N'-methylnicotinate)	Line	4.27	<.0001	2.05e-05
trigonelline (N'-methylnicotinate)	Sex	11.19	0.0018	0.00242115
trigonelline (N'-methylnicotinate)	Sex*Line	0.75	0.8538	1
tryptophan	Line	3.06	0.0004	0.000635
tryptophan	Sex	122.17	<.0001	3.1551e-13
tryptophan	Sex*Line	2.62	<.0001	7.41279e-05
tyrosine	Line	3.91	<.0001	5.47455e-05
tyrosine	Sex	15.27	0.0004	0.00050626
tyrosine	Sex*Line	3.47	<.0001	1.89527e-07
tyrosylglycine	Line	1.19	0.2961	0.320171
tyrosylglycine	Sex	149.85	<.0001	1.5783e-14
tyrosylglycine	Sex*Line	1.2	0.2182	0.424201
UDP-N-acetylglucosamine	Line	7.23	<.0001	3.01902e-08
UDP-N-acetylglucosamine	Sex	34.3	<.0001	1.32026e-06
UDP-N-acetylglucosamine	Sex*Line	1.15	0.2679	0.505686
undecanedioate	Line	3.45	<.0001	0.00019592
undecanedioate	Sex	10.81	0.0021	0.00281402
undecanedioate	Sex*Line	0.8	0.7901	1
uracil	Line	2.09	0.0116	0.0148899
uracil	Sex	107.66	<.0001	1.922e-12
uracil	Sex*Line	3.83	<.0001	1.35053e-08
urate	Line	3.89	<.0001	5.58e-05
urate	Sex	337.63	<.0001	3.2049e-20
urate	Sex*Line	4.2	<.0001	9.877e-10
uridine	Line	3.78	<.0001	7.58631e-05
uridine	Sex	704.98	<.0001	9.3044e-26
uridine	Sex*Line	0.55	0.9858	1
uridine 3'-monophosphate (3'-UMP)	Line	4.7	<.0001	6.68663e-06
uridine 3'-monophosphate (3'-UMP)	Sex	455.64	<.0001	1.8538e-22
uridine 3'-monophosphate (3'-UMP)	Sex*Line	1.2	0.2163	0.422387
uridine-2',3'-cyclic monophosphate	Line	2.26	0.0063	0.0085419
uridine-2',3'-cyclic monophosphate	Sex	729.38	<.0001	5.1039e-26
uridine-2',3'-cyclic monophosphate	Sex*Line	1.16	0.2574	0.487962
valine	Line	3.4	0.0001	0.00022504
valine	Sex	938.47	<.0001	5.2893e-28
valine	Sex*Line	3.01	<.0001	4.49672e-06
valylglutamine	Line	4.42	<.0001	1.38052e-05
valylglutamine	Sex	315.63	<.0001	9.8148e-20
valylglutamine	Sex*Line	1.62	0.0203	0.0532382
valylglycine	Line	5.2	<.0001	1.92383e-06
valylglycine	Sex	436.12	<.0001	3.9533e-22
valylglycine	Sex*Line	1.29	0.1409	0.292713
valylleucinamide	Line	11.46	<.0001	4.289e-11
valylleucinamide	Sex	474.86	<.0001	9.1741e-23
valylleucinamide	Sex*Line	1.13	0.2939	0.547822
valylleucine	Line	4.25	<.0001	2.17324e-05
valylleucine	Sex	300.35	<.0001	2.1994e-19
valylleucine	Sex*Line	1.75	0.0085	0.0253887
xanthine	Line	2.15	0.0095	0.0125749
xanthine	Sex	25.44	<.0001	1.65074e-05
xanthine	Sex*Line	4.74	<.0001	2.6373e-11
xanthopterin	Line	7.92	<.0001	9.04566e-09
xanthopterin	Sex	117.08	<.0001	5.8716e-13
xanthopterin	Sex*Line	0.3	1	1
xanthosine	Line	39.12	<.0001	1.0986e-19
xanthosine	Sex	24.11	<.0001	2.49176e-05
xanthosine	Sex*Line	0.25	1	1
xanthurenate	Line	172.81	<.0001	2.9753e-31
xanthurenate	Sex	10.52	0.0024	0.00316079
xanthurenate	Sex*Line	3.14	<.0001	1.89303e-06
