# Supplementary material for: Systems genetics of the Drosophila metabolome
Source: Genome Res. 2020 Mar;30(3):392–405. doi: 10.1101/gr.243030.118 (PMC7111526; doi:10.1101/gr.243030.118)
Supplement: Supplemental Material [file supp_gr.243030.118_Supplemental_Table_S3.xlsx.xlsx]

## Sheet: A. Females
Supplemental Table S3. Reduced model ANOVAs. DF indicates degrees of freedom. Metabolites that are not genetically variable are highlighted in gray. (A) Females. (B) Males
Metabolite	Metabolite ID	DF	F Value	P-value	FDR	Var Component Line	Var Component Rep[Line]	Heritability	Mean of Response	CV Line	CV Rep[Line]
pipecolate	1444	39	153.36	4.16e-61	1.88e-58	1602.34	31.5509	0.98069	10.4192	384.188	53.9104
nicotinamide ribonucleotide (NMN)	22152	39	110.92	1.32e-55	2.39e-53	345.731	9.43578	0.97343	4.88728	380.454	62.8524
N6,N6,N6-trimethyllysine	1498	39	85.17	3.72e-51	4.81e-49	14.463	0.515473	0.96559	2.61927	145.194	27.4108
trans-4-hydroxyproline	32306	39	81.38	2.16e-50	2.44e-48	482.762	18.0176	0.96402	6.23736	352.262	68.0531
xanthurenate	15679	39	79.47	5.38e-50	4.77e-48	0.15192	0.00580786	0.96318	0.979741	39.7828	7.77852
7-methylguanine	35114	39	79.32	5.79e-50	4.77e-48	0.302518	0.0115875	0.96311	1.00108	54.9425	10.753
pterin	43023	39	50.81	1.4e-42	9.07e-41	0.280899	0.0169182	0.94319	1.0439	50.7709	12.46
sepiapterin	48139	39	34.1	3.98e-36	2e-34	0.0700459	0.00634865	0.9169	0.701346	37.7363	11.3608
kynurenate	1417	39	33.38	8.7e-36	4.15e-34	0.381751	0.0353686	0.91521	1.36231	45.3539	13.8049
phosphoethanolamine	1600	39	30.55	2.2e-34	9.48e-33	0.169044	0.0171596	0.90784	1.11014	37.0359	11.7999
cytidine 5'-monophosphate (5'-CMP)	2372	39	26.4	4.27e-32	1.61e-30	4.35736	0.514582	0.89438	1.15341	180.979	62.1933
taurine	2125	39	23.48	2.76e-30	9.27e-29	0.0294646	0.00393141	0.88228	0.839725	20.4415	7.46684
3-hydroxykynurenine	22110	39	23.35	3.38e-30	1.06e-28	0.0776375	0.0104216	0.88165	0.843679	33.0262	12.1001
choline phosphate	34396	39	19.29	2.63e-27	7.22e-26	0.054608	0.00895539	0.85911	1.15203	20.2845	8.21443
N1-methyladenosine	15650	39	17.23	1.24e-25	3.03e-24	0.125339	0.0231619	0.84403	1.22461	28.9099	12.4277
dihydrobiopterin	35129	39	15.38	5.57e-24	1.2e-22	0.0272996	0.0056935	0.82743	0.739746	22.3355	10.2002
N-acetylalanine	1585	39	15.31	6.59e-24	1.36e-22	0.175305	0.0367596	0.82666	1.65181	25.3477	11.6072
3-aminoisobutyrate	1566	39	15.13	9.73e-24	1.96e-22	6.43573	1.36665	0.82484	2.01187	126.095	58.1068
tetradecanedioate	35669	39	14.87	1.72e-23	3.38e-22	0.323708	0.0700176	0.82217	1.2085	47.0792	21.8955
ornithine	1493	39	14.77	2.12e-23	4.09e-22	0.564699	0.122993	0.82115	1.1348	66.2202	30.9045
sarcosine	1516	39	14.76	2.21e-23	4.18e-22	0.33567	0.0732075	0.82095	0.810469	71.4857	33.3842
isobutyrylcarnitine	33441	39	13.44	4.66e-22	8.12e-21	0.466895	0.112596	0.8057	0.782663	87.3041	42.8733
dodecanedioate	32388	39	13.3	6.53e-22	1.12e-20	0.589165	0.143695	0.80393	1.49289	51.415	25.3917
biopterin	12358	39	13.06	1.17e-21	1.96e-20	0.0187126	0.00465399	0.80083	0.769271	17.7823	8.86816
1-methyladenine	1527	39	12.99	1.39e-21	2.25e-20	0.0774957	0.0193891	0.79987	0.79055	35.2135	17.6137
methionine sulfoxide	18374	39	12.92	1.65e-21	2.53e-20	0.109954	0.0276665	0.79896	1.43992	23.0285	11.5515
1-methylhistamine	43831	39	12.91	1.7e-21	2.53e-20	0.186626	0.0470058	0.7988	0.734718	58.7985	29.5091
N-acetyl-glucosamine 1-phosphate	15741	39	12.72	2.75e-21	3.95e-20	0.0815977	0.0208899	0.79617	1.07313	26.6186	13.4684
isoxanthopterin	27732	39	12.39	6.28e-21	8.62e-20	0.0354901	0.00934586	0.79155	0.440609	42.7563	21.941
myristoylcarnitine	33952	39	12.14	1.2e-20	1.6e-19	3.71149	0.999404	0.78785	1.44076	133.716	69.3873
3-hydroxybutyrylcarnitine (2)	52984	39	11.95	1.96e-20	2.54e-19	0.232871	0.0637779	0.78501	1.15511	41.7768	21.8631
pantothenate	1508	39	10.85	3.98e-19	4.93e-18	0.0543958	0.016561	0.7666	1.17743	19.8083	10.9297
adenosine 5'-monophosphate (AMP)	32342	39	10.76	5.25e-19	6.25e-18	1.07745	0.331308	0.76482	1.00047	103.751	57.5322
1,2-dilinoleoyl-GPE (18:2/18:2)*	53174	39	10.67	6.76e-19	7.85e-18	0.351268	0.109	0.76318	2.46055	24.0873	13.4178
1-methylurate	34395	39	10.6	8.19e-19	9.39e-18	0.0502441	0.0156991	0.76193	0.866023	25.8829	14.468
sedoheptulose-7-phosphate	35649	39	10.44	1.31e-18	1.49e-17	0.0994513	0.0316109	0.75881	0.947345	33.2887	18.7677
panose	37284	39	10.43	1.34e-18	1.5e-17	0.376712	0.119812	0.7587	1.49259	41.1212	23.1905
1,2-dioleoyl-GPE (18:1/18:1)	52609	39	10.29	2.01e-18	2.14e-17	0.201386	0.0650101	0.75596	2.16425	20.7352	11.781
gamma-tocopherol/beta-tocopherol	52473	39	10.18	2.79e-18	2.94e-17	0.271456	0.0886795	0.75376	1.12281	46.4027	26.5219
isomaltose	39777	39	10.04	4.31e-18	4.49e-17	0.251373	0.0834436	0.75078	1.50301	33.3577	19.2191
1,2-dilinoleoyl-GPC (18:2/18:2)	52603	39	10.01	4.64e-18	4.78e-17	0.390316	0.129916	0.75027	2.41219	25.8999	14.9424
N-acetyl-beta-alanine	37432	39	9.86	7.45e-18	7.58e-17	0.568583	0.192594	0.74698	1.43716	52.4677	30.5363
1,2-dipalmitoleoyl-GPC (16:1/16:1)*	52472	39	9.68	1.26e-17	1.23e-16	0.403844	0.139506	0.74325	2.17199	29.2583	17.1965
histamine	1574	39	9.67	1.32e-17	1.27e-16	0.0359678	0.0124445	0.74295	0.907112	20.9072	12.2978
cystathionine	15705	39	9.62	1.55e-17	1.45e-16	0.284848	0.0991637	0.74177	1.09018	48.9564	28.8854
glycerate	1572	39	9.36	3.53e-17	3.23e-16	0.111972	0.0402038	0.73581	1.18434	28.2539	16.93
sedoheptulose	53237	39	9.28	4.43e-17	4.02e-16	0.132715	0.0480634	0.73413	1.3811	26.3775	15.8738
alpha-tocotrienol	37502	39	9.25	4.9e-17	4.39e-16	0.240687	0.0874984	0.73339	0.929229	52.7963	31.833
prolylglycine	40703	39	9.14	7.01e-17	6.17e-16	0.653687	0.24091	0.73071	2.02114	40.0027	24.2847
1-(1-enyl-stearoyl)-GPE (P-18:0)*	39271	39	9.06	8.96e-17	7.81e-16	0.16496	0.0613685	0.72885	1.34803	30.1294	18.377
methionine	1302	39	8.81	2.09e-16	1.77e-15	0.196189	0.0754084	0.72235	1.81184	24.4466	15.1562
gamma-glutamylmethionine	44872	39	8.69	3.04e-16	2.53e-15	0.928196	0.362025	0.71941	0.768012	125.444	78.3431
laurate (12:0)	1645	39	8.62	3.93e-16	3.24e-15	0.0452098	0.0178107	0.71738	0.976279	21.7792	13.6699
5-aminolevulinate	2290	39	8.61	4.03e-16	3.29e-15	0.250759	0.0988855	0.71718	1.10621	45.2678	28.4268
maltose	15586	39	8.59	4.25e-16	3.43e-15	0.172786	0.068276	0.71677	1.01536	40.9388	25.7344
valine	1649	39	8.55	4.86e-16	3.83e-15	0.200623	0.0796978	0.71569	1.78956	25.029	15.7752
propionylcarnitine	32452	39	8.49	5.96e-16	4.65e-15	1.02646	0.411039	0.71406	1.10878	91.3745	57.8224
2-aminooctanoate	43343	39	8.39	8.37e-16	6.42e-15	0.187365	0.0760452	0.7113	0.689608	62.7685	39.9884
histidine	59	39	8.38	8.67e-16	6.6e-15	0.0396549	0.0161172	0.71102	1.08029	18.4336	11.7518
cysteinylglycine	35637	39	8.36	9.35e-16	7e-15	0.339975	0.138594	0.7104	1.19116	48.9501	31.2537
1,2-dipalmitoyl-GPC (16:0/16:0)	19130	39	8.31	1.12e-15	8.32e-15	0.0652486	0.0267908	0.70892	1.84099	13.8751	8.89082
1-palmitoyl-2-linoleoyl-GPI (16:0/18:2)	52450	39	8.23	1.47e-15	1.07e-14	0.137725	0.0571599	0.7067	2.04426	18.1539	11.6953
tyrosine	1299	39	8.18	1.75e-15	1.27e-14	0.311936	0.130385	0.70523	0.959539	58.2063	37.6314
leucine	60	39	7.92	4.38e-15	3.03e-14	0.135957	0.0589764	0.69745	1.62997	22.6216	14.8991
5-oxoproline	1494	39	7.89	4.76e-15	3.27e-14	0.0597949	0.0260265	0.69674	1.13152	21.6108	14.2576
palmitoloelycholine	53257	39	7.78	7.01e-15	4.74e-14	0.35257	0.155907	0.69338	1.54927	38.3263	25.4863
1-(1-enyl-stearoyl)-2-linoleoyl-GPE (P-18:0/18:2)*	52748	39	7.75	7.97e-15	5.35e-14	0.0177945	0.00791072	0.69225	0.910845	14.6453	9.76481
1-(1-enyl-stearoyl)-2-oleoyl-GPE (P-18:0/18:1)	52614	39	7.65	1.14e-14	7.31e-14	0.0386684	0.0174445	0.68912	0.908046	21.6556	14.5453
cystine	56	39	7.64	1.18e-14	7.55e-14	0.134868	0.0609431	0.68877	0.590391	62.2034	41.8141
1-stearoyl-2-linoleoyl-GPC (18:0/18:2)*	52452	39	7.59	1.4e-14	8.9e-14	0.424855	0.193352	0.68724	2.80337	23.2509	15.6853
glucose 1-phosphate	15561	39	7.48	2.14e-14	1.33e-13	0.124872	0.0578421	0.68343	1.06361	33.2237	22.6119
9,10-DiHOME	38399	39	7.44	2.48e-14	1.51e-13	0.125019	0.0582608	0.68212	1.1415	30.9751	21.1453
1-palmitoyl-2-palmitoleoyl-GPC (16:0/16:1)*	52470	39	7.31	3.97e-14	2.38e-13	0.126961	0.0603567	0.67778	1.52192	23.4122	16.1425
kojibiose	21040	39	7.29	4.3e-14	2.55e-13	0.28099	0.134039	0.67704	1.46563	36.1676	24.9799
dimethylarginine (SDMA + ADMA)	36808	39	7.28	4.44e-14	2.59e-13	0.114237	0.0545637	0.67676	1.43503	23.5527	16.2776
1-palmitoleoyl-3-oleoyl-glycerol (16:1/18:1)*	52631	39	7.28	4.49e-14	2.61e-13	0.250008	0.11948	0.67663	2.2224	22.4985	15.5534
urate	1604	39	7.21	5.9e-14	3.4e-13	0.0224409	0.0108495	0.6741	0.773977	19.3549	13.4579
glycylleucine	34398	39	7.18	6.56e-14	3.74e-13	0.303915	0.1476	0.6731	1.90032	29.0101	20.217
serine	1648	39	7.13	7.85e-14	4.42e-13	0.0792569	0.0387907	0.6714	1.48445	18.965	13.2678
glucose 6-phosphate	31260	39	7.11	8.57e-14	4.76e-13	0.228007	0.112015	0.67057	1.19949	39.8087	27.9024
glucose	48152	39	7.02	1.18e-13	6.5e-13	0.0493572	0.0245815	0.66754	1.12214	19.7983	13.972
linoleoylcarnitine*	46223	39	6.97	1.45e-13	7.93e-13	0.763057	0.38353	0.6655	1.29048	67.6902	47.9896
mannose-6-phosphate	1469	39	6.96	1.52e-13	8.2e-13	0.143516	0.0722787	0.66506	1.10395	34.3164	24.3532
asparagine	512	39	6.89	1.95e-13	1.04e-12	0.088154	0.044882	0.66263	1.5792	18.8011	13.4153
valylleucinamide	37460	39	6.89	1.96e-13	1.04e-12	0.406188	0.206846	0.66259	1.76186	36.1737	25.8139
lactate	527	39	6.89	1.98e-13	1.04e-12	0.0816048	0.0415731	0.6625	1.14184	25.0181	17.8567
kynurenine	15140	39	6.87	2.14e-13	1.12e-12	0.198078	0.101259	0.66172	1.54787	28.7531	20.5581
gamma-glutamylglutamine	2730	39	6.84	2.4e-13	1.24e-12	0.654354	0.336203	0.66059	0.875676	92.3768	66.2151
glycylvaline	18357	39	6.82	2.56e-13	1.32e-12	0.55717	0.287092	0.65995	2.24089	33.3099	23.9106
13-methylmyristate	38293	39	6.8	2.84e-13	1.45e-12	0.0811961	0.042027	0.65894	0.775567	36.7408	26.4329
N-palmitoyl-sphinganine (d18:0/16:0)	52604	39	6.74	3.49e-13	1.75e-12	0.070399	0.036772	0.65688	1.21571	21.8249	15.7735
N6-carboxymethyllysine	36713	39	6.71	3.95e-13	1.96e-12	0.0483625	0.0254007	0.65565	1.05394	20.866	15.122
proline	1898	39	6.64	5.29e-13	2.57e-12	0.0230226	0.0122496	0.65271	1.00638	15.077	10.9977
phenylalanine	64	39	6.55	7.6e-13	3.64e-12	0.169159	0.0914836	0.64901	1.77719	23.1427	17.0191
N-monomethylarginine	43586	39	6.53	8.03e-13	3.83e-12	0.155416	0.0842597	0.64844	1.43336	27.5039	20.2514
maltopentaose	35163	39	6.52	8.49e-13	4.03e-12	0.189305	0.102893	0.64787	1.19946	36.2739	26.7427
1-stearoyl-GPE (18:0)	42398	39	6.49	9.46e-13	4.46e-12	1.9854	1.08438	0.64676	4.19408	33.596	24.8287
1,2-dioleoyl-GPC (18:1/18:1)*	52457	39	6.33	1.82e-12	8.46e-12	0.267715	0.150651	0.63991	2.52819	20.4657	15.3524
lactosyl-N-palmitoyl-sphingosine	53010	39	6.26	2.43e-12	1.11e-11	0.164989	0.0940949	0.63682	0.984358	41.2643	31.1623
glutarate (pentanedioate)	396	39	6.24	2.61e-12	1.18e-11	0.373464	0.213678	0.63607	1.13822	53.6906	40.612
1-palmitoyl-2-oleoyl-GPE (16:0/18:1)	19263	39	6.14	4.08e-12	1.82e-11	0.0884171	0.0516525	0.63124	1.9337	15.3773	11.7532
deoxycarnitine	36747	39	6.08	5.11e-12	2.27e-11	0.196807	0.116196	0.62877	1.25565	35.3306	27.1473
glycosyl-N-palmitoyl-sphingosine	53013	39	6.07	5.43e-12	2.4e-11	0.027843	0.0164853	0.62811	0.993237	16.7998	12.9269
N-acetylglucosamine 6-phosphate	15107	39	6	7.24e-12	3.14e-11	0.143602	0.0861914	0.62492	1.52124	24.9106	19.299
xanthine	3147	39	6	7.31e-12	3.15e-11	0.152139	0.0913582	0.62481	0.912789	42.7316	33.1134
glutamine	53	39	5.92	1.02e-11	4.3e-11	0.0214401	0.0130784	0.62112	1.08096	13.5458	10.5796
3-hydroxylaurate	32457	39	5.92	1.03e-11	4.33e-11	0.19663	0.120009	0.62099	1.12982	39.2477	30.6617
N-acetylaspartate (NAA)	22185	39	5.91	1.07e-11	4.47e-11	8.18202	5.00246	0.62058	1.87361	152.669	119.375
xanthosine	15136	39	5.89	1.15e-11	4.79e-11	114.612	70.3181	0.61976	4.70942	227.325	178.06
ribose	1471	39	5.87	1.24e-11	5.15e-11	0.429127	0.264263	0.61888	1.38348	47.3499	37.1574
N-acetylmethionine sulfoxide	45428	39	5.84	1.43e-11	5.91e-11	0.546264	0.338722	0.61726	1.74368	42.3872	33.3777
arabitol/xylitol	48885	39	5.77	1.88e-11	7.69e-11	0.0557087	0.0350033	0.61413	1.1399	20.7059	16.4129
1-oleoyl-2-linoleoyl-GPE (18:1/18:2)*	52687	39	5.75	2.06e-11	8.37e-11	0.135914	0.0857857	0.61305	2.05341	17.9538	14.2637
UDP-N-acetylglucosamine	35162	39	5.75	2.09e-11	8.47e-11	0.0234995	0.0148445	0.61286	1.03962	14.7453	11.7195
12,13-DiHOME	38395	39	5.71	2.49e-11	9.91e-11	0.0601876	0.0383469	0.61083	0.98615	24.8777	19.8574
S-adenosylmethionine (SAM)	15915	39	5.66	3.02e-11	1.19e-10	0.0776285	0.0499221	0.60861	1.1882	23.4489	18.8043
lysine	1301	39	5.66	3.05e-11	1.2e-10	0.169744	0.109221	0.60848	1.876	21.9617	17.6166
maltotriose	44688	39	5.62	3.63e-11	1.42e-10	0.42606	0.276521	0.60642	1.34839	48.4084	38.9986
glycosyl-N-stearoyl-sphingosine	52234	39	5.61	3.77e-11	1.47e-10	0.0287695	0.0187061	0.60598	0.929307	18.2519	14.7174
thiamin monophosphate	15798	39	5.56	4.85e-11	1.87e-10	0.0263691	0.0173619	0.60298	1.01232	16.0409	13.016
ribose 5-phosphate	561	39	5.54	5.25e-11	2.02e-10	0.177401	0.117276	0.60202	1.13698	37.0446	30.1198
orotate	1505	39	5.52	5.59e-11	2.13e-10	0.135658	0.0899581	0.60128	0.858289	42.913	34.9451
argininosuccinate	15497	39	5.43	8.37e-11	3.16e-10	0.210964	0.142772	0.59639	1.21819	37.7042	31.0176
tryptophan	54	39	5.43	8.64e-11	3.23e-10	0.0565703	0.0383466	0.596	1.24067	19.1707	15.7837
1-palmitoleoyl-2-linoleoyl-GPC (16:1/18:2)*	52683	39	5.4	9.58e-11	3.56e-10	0.294426	0.200625	0.59474	2.33401	23.248	19.1907
adenine	554	39	5.35	1.2e-10	4.43e-10	0.09719	0.0670028	0.59193	0.775551	40.1976	33.3761
thymine	604	39	5.32	1.39e-10	5.09e-10	0.796274	0.55312	0.5901	1.15339	77.3669	64.4813
2'-O-methylguanosine	36811	39	5.3	1.55e-10	5.58e-10	0.0194053	0.0135521	0.5888	0.858537	16.2256	13.5595
flavin mononucleotide (FMN)	15797	39	5.24	2e-10	7.12e-10	0.0304456	0.0215499	0.58554	1.04858	16.6403	13.9998
threonine	1284	39	5.22	2.14e-10	7.48e-10	0.117416	0.0833918	0.58472	1.48196	23.122	19.486
hypoxanthine	3127	39	5.21	2.24e-10	7.81e-10	0.312277	0.22233	0.58413	0.791909	70.5659	59.542
nonadecanoate (19:0)	1356	39	5.2	2.36e-10	8.19e-10	0.0821309	0.0586312	0.58347	1.08445	26.4267	22.3282
1-stearoyl-GPI (18:0)	19324	39	5.18	2.65e-10	9.17e-10	0.138743	0.0996543	0.58198	1.02812	36.2294	30.7047
N-acetylglucosamine/N-acetylgalactosamine	46539	39	5.05	4.7e-10	1.56e-09	0.153672	0.113777	0.57458	1.26807	30.9139	26.6001
glucosamine-6-phosphate	580	39	5.04	5.01e-10	1.65e-09	0.123051	0.0914122	0.57376	1.08771	32.2499	27.7963
1-oleoyl-3-linoleoyl-glycerol (18:1/18:2)	46799	39	5.01	5.65e-10	1.84e-09	0.0955206	0.0714237	0.57217	1.6048	19.2587	16.6533
N-acetylserine	37076	39	5.01	5.73e-10	1.85e-09	0.103452	0.077411	0.57199	1.4371	22.3811	19.3604
stachydrine	34384	39	4.99	6.31e-10	2.03e-09	0.703638	0.529251	0.57072	1.34296	62.4613	54.1711
pyroglutamine*	46225	39	4.98	6.46e-10	2.08e-09	0.305973	0.230444	0.5704	1.00506	55.0364	47.7629
glycerophosphorylcholine (GPC)	15990	39	4.97	7.01e-10	2.24e-09	0.0130397	0.00986395	0.56933	0.576004	19.8248	17.2425
putrescine	1408	39	4.95	7.47e-10	2.37e-09	0.0331935	0.0251955	0.56849	0.612264	29.7569	25.9253
thiamin (Vitamin B1)	5341	39	4.95	7.54e-10	2.39e-09	0.0825332	0.0626794	0.56836	1.26241	22.7569	19.8318
arginine	1638	39	4.92	8.64e-10	2.68e-09	0.00928712	0.00710556	0.56654	1.07924	8.92938	7.81052
2-methylserine	53229	39	4.88	1.05e-09	3.23e-09	5.55864	4.29758	0.56397	1.579	149.315	131.29
N-acetylglutamate	15720	39	4.85	1.23e-09	3.79e-09	0.183702	0.143327	0.56173	1.00809	42.5166	37.5549
1-oleoyl-2-linoleoyl-GPI (18:1/18:2)*	52451	39	4.84	1.26e-09	3.84e-09	0.106466	0.0831639	0.56144	2.09092	15.6052	13.7921
myristoleate (14:1n5)	32418	39	4.82	1.39e-09	4.21e-09	0.0199777	0.0156886	0.56013	0.918448	15.3893	13.6376
ribitol	15772	39	4.82	1.41e-09	4.24e-09	0.815558	0.640906	0.55996	1.65859	54.4489	48.268
isoleucine	1125	39	4.76	1.8e-09	5.41e-09	0.125799	0.100247	0.55652	1.74781	20.2928	18.1151
dehydroascorbate	1659	39	4.71	2.32e-09	6.87e-09	0.311578	0.251817	0.55304	1.02709	54.3471	48.858
nicotinate ribonucleoside	33471	39	4.7	2.44e-09	7.19e-09	0.888703	0.720243	0.55235	1.19146	79.1223	71.2295
1-oleoyl-GPS (18:1)	19260	39	4.65	3.12e-09	9.16e-09	0.777426	0.639009	0.54886	2.10134	41.9597	38.0414
O-sulfo-L-tyrosine	45413	39	4.63	3.49e-09	1.02e-08	0.170165	0.140769	0.54727	1.07929	38.2204	34.7627
1-palmitoyl-3-linoleoyl-glycerol (16:0/18:2)*	52634	39	4.61	3.8e-09	1.1e-08	0.140707	0.116952	0.5461	2.07482	18.0791	16.4825
ethylmalonate	15765	39	4.61	3.83e-09	1.11e-08	0.344444	0.286453	0.54596	1.40593	41.7442	38.0683
palmitoleoylcarnitine*	53223	39	4.59	4.25e-09	1.22e-08	2.52759	2.11447	0.5445	1.41289	112.524	102.918
guanosine 3'-monophosphate (3'-GMP)	39786	39	4.58	4.39e-09	1.26e-08	0.0789245	0.0661507	0.54402	1.40843	19.9467	18.2613
acetylphosphate	15488	39	4.57	4.53e-09	1.29e-08	0.0576487	0.0484092	0.54356	0.94582	25.3855	23.2624
glycylisoleucine	36659	39	4.54	5.2e-09	1.47e-08	0.301844	0.255482	0.54159	1.86035	29.5323	27.1697
cytidine-5'-diphosphoethanolamine	34410	39	4.53	5.68e-09	1.6e-08	0.531265	0.452018	0.5403	1.42189	51.2614	47.2839
N6,N6-dimethyladenosine	42081	39	4.45	8.19e-09	2.28e-08	0.293115	0.254803	0.53496	0.977674	55.3764	51.6307
maltotetraose	15910	39	4.44	8.52e-09	2.37e-08	0.506513	0.441344	0.53438	1.39776	50.9171	47.5288
uracil	605	39	4.44	8.82e-09	2.43e-08	0.0460824	0.0402348	0.53387	0.806016	26.6332	24.8861
1-palmitoleoyl-2-oleoyl-glycerol (16:1/18:1)*	52632	39	4.4	1.04e-08	2.85e-08	0.0600591	0.0529687	0.53137	1.44284	16.9853	15.9512
3-methyl-2-oxobutyrate	44526	39	4.37	1.21e-08	3.26e-08	0.629573	0.560051	0.52922	2.5607	30.986	29.2251
glycerophosphoethanolamine	37455	39	4.33	1.52e-08	4.08e-08	0.00892487	0.00805065	0.52575	0.646835	14.6052	13.8715
1-palmitoyl-GPE (16:0)	35631	39	4.3	1.69e-08	4.52e-08	3.84081	3.48761	0.5241	4.66181	42.0394	40.0599
dihomo-linoleate (20:2n6)	17805	39	4.29	1.79e-08	4.75e-08	0.70775	0.644802	0.52327	2.60646	32.2766	30.8078
N-acetylleucine	1587	39	4.24	2.32e-08	6.08e-08	0.364085	0.337066	0.51927	1.40909	42.8216	41.2021
riboflavin (Vitamin B2)	1827	39	4.19	3.06e-08	7.93e-08	0.246225	0.231881	0.515	1.10987	44.7089	43.3871
3-hydroxymyristate	21158	39	4.17	3.31e-08	8.53e-08	0.028214	0.0267012	0.51377	0.902167	18.6185	18.1125
N-delta-acetylornithine	43249	39	4.14	3.78e-08	9.66e-08	0.287085	0.273975	0.51168	1.17211	45.7128	44.6569
nicotinate	1504	39	4.13	4.07e-08	1.03e-07	0.156284	0.149845	0.51052	1.36227	29.0197	28.4156
uridine 3'-monophosphate (3'-UMP)	39764	39	4.12	4.22e-08	1.07e-07	0.0450165	0.0432667	0.50991	1.3385	15.8514	15.5402
thioproline	53231	39	4.12	4.34e-08	1.09e-07	0.0465339	0.0447992	0.5095	0.364158	59.2372	58.1226
4-guanidinobutanoate	15681	39	4.09	4.83e-08	1.22e-07	0.222161	0.215347	0.50779	1.18589	39.7455	39.1312
16-hydroxypalmitate	39609	39	4.09	4.91e-08	1.23e-07	0.13605	0.132022	0.50751	0.895931	41.1695	40.5553
1-stearoyl-2-linoleoyl-GPE (18:0/18:2)*	52446	39	4.09	4.95e-08	1.24e-07	0.258932	0.251383	0.5074	2.52159	20.1799	19.8836
N-acetyltaurine	48187	39	4.09	4.98e-08	1.24e-07	0.0889056	0.0863509	0.50729	0.893464	33.3724	32.8894
glycerophosphoglycerol	48857	39	4.09	5e-08	1.24e-07	0.013472	0.0130879	0.50723	0.44557	26.0496	25.6755
3-hydroxyisobutyrate	1549	39	3.98	8.7e-08	2.15e-07	0.306732	0.30885	0.49828	1.35549	40.8587	40.9995
alanine	1126	39	3.97	8.91e-08	2.19e-07	0.035168	0.035466	0.49789	1.195	15.6931	15.7594
1-linoleoyl-2-linolenoyl-GPC (18:2/18:3)*	53176	39	3.96	9.49e-08	2.32e-07	0.427541	0.432959	0.49685	2.36501	27.6475	27.8221
gamma-glutamylhistidine	18245	39	3.91	1.23e-07	2.94e-07	0.0976775	0.100638	0.49254	1.10456	28.2948	28.7204
methionine sulfone	44878	39	3.89	1.41e-07	3.35e-07	2.43872	2.53561	0.49026	1.72378	90.5938	92.3759
1-palmitoyl-2-linoleoyl-GPC (16:0/18:2)	42446	39	3.88	1.45e-07	3.44e-07	0.168953	0.176023	0.48975	2.15319	19.0898	19.4851
threonate	27738	39	3.86	1.62e-07	3.81e-07	0.23192	0.243366	0.48796	1.16481	41.3442	42.3522
glycerol 3-phosphate	43847	39	3.84	1.81e-07	4.25e-07	0.0920733	0.0973659	0.48603	0.683038	44.4244	45.6834
glycerol	15122	39	3.84	1.83e-07	4.28e-07	0.0189059	0.0200055	0.48587	0.810154	16.9719	17.4585
pyridoxal	1651	39	3.82	1.94e-07	4.53e-07	0.0329032	0.0349593	0.48485	0.893664	20.2976	20.9222
acetylcarnitine	32198	39	3.78	2.44e-07	5.66e-07	0.0391114	0.0422079	0.48096	0.927929	21.3126	22.1402
pyridoxate	31555	39	3.76	2.77e-07	6.39e-07	0.0202906	0.0220913	0.47876	1.06759	13.3427	13.9222
glycerophosphoinositol*	47155	39	3.75	2.78e-07	6.39e-07	0.00735489	0.00800913	0.47871	0.275853	31.0892	32.4425
1-oleoyl-2-linoleoyl-glycerol (18:1/18:2)	46798	39	3.75	2.85e-07	6.54e-07	0.0763848	0.0833281	0.47826	1.20237	22.9861	24.0081
fumarate	1643	39	3.73	3.11e-07	7.11e-07	0.0381652	0.041881	0.47679	1.25172	15.6073	16.3494
N-acetylhistamine	48679	39	3.73	3.11e-07	7.11e-07	0.00376313	0.0041303	0.47674	0.0982433	62.4413	65.4165
campesterol	33997	39	3.68	4.12e-07	9.38e-07	0.0178756	0.02001	0.47183	0.821961	16.2659	17.2097
6-phosphogluconate	15442	39	3.66	4.52e-07	1.03e-06	1.06097	1.19545	0.4702	1.17781	87.4534	92.8302
phosphothreonine	37453	39	3.66	4.67e-07	1.06e-06	0.137062	0.1548	0.46961	0.612826	60.4117	64.2021
S-adenosylhomocysteine (SAH)	42382	39	3.6	6.13e-07	1.37e-06	0.0635075	0.0731461	0.46473	0.738872	34.107	36.6038
pseudouridine	33442	39	3.58	7.09e-07	1.58e-06	0.0795415	0.0925784	0.46213	1.28663	21.9201	23.6483
citraconate/glutaconate	47076	39	3.57	7.35e-07	1.64e-06	0.173425	0.202385	0.46147	1.06723	39.0209	42.1532
phytosphingosine	1510	39	3.53	9e-07	1.99e-06	0.278505	0.32989	0.45777	1.71156	30.8336	33.5577
glutamate	57	39	3.5	1.1e-06	2.42e-06	0.0309242	0.0371828	0.45405	1.06355	16.5345	18.1306
N-palmitoyl-sphingosine (d18:1/16:0)	44877	39	3.46	1.31e-06	2.87e-06	0.0419068	0.0510507	0.45082	1.47147	13.9121	15.355
mesaconate (methylfumarate)	18493	39	3.4	1.79e-06	3.89e-06	0.225997	0.282022	0.44486	1.02265	46.4863	51.9296
4-hydroxyhippurate	35527	39	3.39	1.91e-06	4.14e-06	10.7793	13.5197	0.44361	2.05061	160.108	179.308
alanylleucine	37093	39	3.38	2.01e-06	4.33e-06	0.846464	1.06559	0.4427	2.02008	45.5444	51.1006
valylleucine	39994	39	3.38	2.03e-06	4.38e-06	5.35667	6.75015	0.44245	3.55997	65.0132	72.9812
valylglutamine	42079	39	3.38	2.09e-06	4.48e-06	3.18242	4.01806	0.44197	2.55962	69.6951	78.3127
inositol 1-phosphate (I1P)	43849	39	3.37	2.12e-06	4.55e-06	0.0553585	0.0699925	0.44163	1.04683	22.4758	25.2725
1-palmitoyl-2-linoleoyl-glycerol (16:0/18:2)*	52633	39	3.35	2.34e-06	5e-06	0.133772	0.170447	0.43972	1.26255	28.969	32.6999
cytidine	514	39	3.35	2.44e-06	5.18e-06	0.0931759	0.119089	0.43896	1.87288	16.2983	18.4258
glutaminylleucine	42994	39	3.31	2.98e-06	6.26e-06	0.919306	1.19379	0.43505	2.54993	37.6012	42.8486
adenosine-2',3'-cyclic monophosphate	37467	39	3.3	3.13e-06	6.56e-06	0.177195	0.230986	0.43411	1.39887	30.0918	34.3571
mannitol/sorbitol	46142	39	3.25	4.09e-06	8.46e-06	0.109389	0.145721	0.42879	1.31725	25.1083	28.9795
1-palmitoyl-2-oleoyl-GPC (16:0/18:1)	52461	39	3.24	4.45e-06	9.19e-06	0.125059	0.16776	0.42709	2.30591	15.3361	17.7624
alpha-tocopherol	1561	39	3.18	5.99e-06	1.22536e-05	0.026762	0.036791	0.4211	0.917457	17.8309	20.9067
N-acetylglutamine	33943	39	3.18	6.05e-06	1.23544e-05	0.192792	0.265272	0.42088	1.22168	35.9409	42.1589
17-methylstearate	38296	39	3.18	6.19e-06	1.26056e-05	0.0563109	0.077626	0.42043	0.946874	25.0613	29.4247
pyridoxamine	2150	39	3.17	6.56e-06	1.33284e-05	0.0484522	0.0671186	0.41924	1.11148	19.8041	23.3088
1-linoleoyl-GPE (18:2)*	36600	39	3.16	6.71e-06	1.3528e-05	0.501875	0.696526	0.41879	4.08612	17.3375	20.4248
1-oleoyl-GPG (18:1)*	45968	39	3.16	6.72e-06	1.3528e-05	0.101989	0.141564	0.41875	1.09265	29.2278	34.4347
allantoin	1107	39	3.15	7.02e-06	1.40953e-05	1.27736	1.77951	0.41787	1.4043	80.4815	94.9924
1-linoleoyl-GPI (18:2)*	36594	39	3.15	7.35e-06	1.46965e-05	0.813914	1.13831	0.41692	3.45957	26.0776	30.8397
cysteine	1868	39	3.14	7.65e-06	1.5235e-05	0.0587642	0.0824682	0.41608	0.731696	33.1303	39.2476
palmitoylcarnitine	44681	39	3.13	8.06e-06	1.59735e-05	0.049024	0.0691029	0.41501	1.07655	20.567	24.4182
erythronate*	42420	39	3.09	1.02129e-05	2.01149e-05	0.094236	0.135572	0.41006	1.20619	25.4504	30.526
arachidate (20:0)	1118	39	3.08	1.02596e-05	2.01631e-05	0.0389968	0.0561248	0.40997	0.991225	19.9224	23.9004
15-methylpalmitate	38768	39	3.08	1.06132e-05	2.0813e-05	0.054744	0.0790209	0.40926	0.957524	24.4353	29.3576
palmitoylcholine	52944	39	3.06	1.19338e-05	2.33018e-05	0.131626	0.191957	0.40678	0.882077	41.1306	49.6702
N-acetylhistidine	33946	39	3.02	1.46409e-05	2.83434e-05	0.0887084	0.131732	0.40241	1.16209	25.6296	31.2324
sulfate*	46960	39	2.99	1.68454e-05	3.24723e-05	0.422303	0.635068	0.39939	0.720017	90.2546	110.68
1-(1-enyl-palmitoyl)-GPE (P-16:0)*	39270	39	2.98	1.81737e-05	3.49584e-05	0.0563331	0.0852991	0.39774	0.670344	35.4066	43.5687
3-methylhistidine	15677	39	2.98	1.82903e-05	3.5108e-05	0.0580454	0.0879429	0.3976	1.01776	23.6722	29.1378
5-methyluridine (ribothymidine)	35136	39	2.98	1.8522e-05	3.54777e-05	0.0551253	0.0836144	0.39733	0.921438	25.4806	31.3816
2'-deoxycytidine	15949	39	2.98	1.86009e-05	3.54884e-05	0.174865	0.26534	0.39724	1.16168	35.997	44.342
1-linoleoyl-GPS (18:2)*	43676	39	2.98	1.8606e-05	3.54884e-05	0.211928	0.321586	0.39723	1.45675	31.6017	38.9282
Isobar: fructose 1,6-diphosphate, glucose 1,6-diphosphate, myo-inositol 1,4 or 1,3-diphosphate	46896	39	2.97	1.96055e-05	3.73164e-05	0.519318	0.791799	0.39609	1.17883	61.1316	75.4842
spermidine	485	39	2.95	2.17771e-05	4.12762e-05	0.00710861	0.0109434	0.39378	0.845439	9.97264	12.3735
dihydoxyphenylalanine (L-DOPA)	1576	39	2.94	2.34285e-05	4.42212e-05	0.256462	0.39749	0.39217	0.641235	78.9759	98.3209
2-stearoyl-GPE (18:0)*	41220	39	2.92	2.48963e-05	4.67967e-05	0.266627	0.415584	0.39083	1.43226	36.052	45.0098
1-kestose	22012	39	2.9	2.87575e-05	5.37203e-05	0.173105	0.273486	0.38761	1.11357	37.3627	46.9625
N2,N2-dimethylguanine	37081	39	2.89	2.94343e-05	5.48713e-05	0.0158085	0.0250306	0.38709	0.709688	17.7165	22.293
aspartate	443	39	2.89	3.0038e-05	5.58818e-05	0.517658	0.821214	0.38664	1.45432	49.4722	62.3114
oleoylcholine	53260	39	2.89	3.06014e-05	5.66971e-05	0.429367	0.682349	0.38622	1.18481	55.3051	69.7194
3-hydroxypalmitate	27503	39	2.87	3.43602e-05	6.34019e-05	0.0251855	0.0404691	0.38361	0.890161	17.8282	22.5992
glucuronate	15443	39	2.85	3.69261e-05	6.78601e-05	0.0488067	0.0789688	0.38197	0.827855	26.6861	33.9448
adenosine 3'-monophosphate (3'-AMP)	35142	39	2.82	4.56384e-05	8.35321e-05	0.0366296	0.0605002	0.37712	1.14663	16.6914	21.4514
oleoylcarnitine	35160	39	2.81	4.73773e-05	8.65063e-05	0.0591155	0.0979994	0.37626	1.20541	20.1704	25.9702
dihydroxyacetone phosphate (DHAP)	15522	39	2.79	5.42965e-05	9.79933e-05	0.302503	0.5083	0.37309	1.09932	50.031	64.8536
alpha-ketoglutarate	528	39	2.75	6.49818e-05	0.000117045	0.209968	0.359246	0.36887	1.14256	40.105	52.4588
lysylleucine	40020	39	2.75	6.54698e-05	0.00011769	0.644837	1.10412	0.3687	2.20332	36.4457	47.6903
mannose	48153	39	2.75	6.65918e-05	0.00011947	0.0378244	0.0648769	0.3683	1.29171	15.0564	19.7188
1-oleoyl-GPE (18:1)	35628	39	2.74	6.84976e-05	0.000122646	0.255279	0.439117	0.36763	3.16092	15.9843	20.9641
leucylglycine	40045	39	2.73	7.56205e-05	0.000134602	1.5003	2.60701	0.36528	2.20851	55.4613	73.1092
1-methylhistidine	30460	39	2.7	8.93536e-05	0.000157806	0.00486735	0.00860548	0.36127	0.904155	7.7162	10.2599
myo-inositol	1124	39	2.69	9.13667e-05	0.000160986	0.00721699	0.0127894	0.36073	0.607206	13.9908	18.6247
5-methylthioadenosine (MTA)	1419	39	2.69	9.15095e-05	0.000160986	0.0981668	0.173993	0.3607	1.24123	25.2423	33.6056
ribose 1-phosphate	1763	39	2.68	9.76389e-05	0.000171104	0.014861	0.0265201	0.35912	0.330583	36.876	49.2615
leucylglutamine*	48189	39	2.68	9.78687e-05	0.000171176	3.52988	6.3008	0.35907	2.29207	81.9694	109.514
3-hydroxypropanoate	1556	39	2.65	0.000114874	0.000199761	0.225302	0.409074	0.35516	1.37082	34.6259	46.6573
adipate	21134	39	2.64	0.000120636	0.00020938	0.493588	0.90092	0.35395	1.15617	60.7658	82.0957
3-hydroxy-3-methylglutarate	531	39	2.62	0.000140486	0.000242901	0.0838366	0.155576	0.35018	1.08864	26.5969	36.2314
caprate (10:0)	1642	39	2.61	0.000142353	0.00024566	0.0152911	0.0284167	0.34985	0.941787	13.1301	17.8992
gamma-glutamylleucine	18369	39	2.57	0.000185236	0.000316649	0.078808	0.150807	0.34322	1.2279	22.8625	31.6264
1-palmitoyl-2-linoleoyl-GPE (16:0/18:2)	42449	39	2.56	0.000188131	0.000320992	0.114219	0.218953	0.34282	1.98429	17.032	23.5815
10-nonadecenoate (19:1n9)	33972	39	2.55	0.000200067	0.000340716	0.0428986	0.08281	0.34125	1.00749	20.558	28.5629
phosphoenolpyruvate (PEP)	597	39	2.54	0.000221756	0.000376944	2.17096	4.24039	0.33861	3.02365	48.7298	68.1038
sucrose	1519	39	2.51	0.000256197	0.000434671	0.0632102	0.125549	0.33487	1.16445	21.591	30.4288
hexanoylglycine	35436	39	2.51	0.000261363	0.000442607	0.0402486	0.0801292	0.33435	0.847365	23.6758	33.406
eicosenoate (20:1)	33587	39	2.51	0.00026374	0.0004458	0.0218231	0.0434929	0.33412	0.882619	16.7373	23.6285
1-oleoyl-2-linoleoyl-GPC (18:1/18:2)*	52453	39	2.5	0.000276513	0.000466519	0.110407	0.221265	0.33288	2.23072	14.8954	21.0868
gamma-glutamylalanine	37063	39	2.5	0.000278041	0.000468225	0.0567301	0.113766	0.33274	0.843575	28.2347	39.9837
leucylalanine	40010	39	2.49	0.000286584	0.000480583	1.60394	3.22806	0.33194	1.65959	76.3122	108.261
3-ureidopropionate	3155	39	2.49	0.000286971	0.000480583	0.870131	1.75149	0.33191	1.51977	61.3783	87.0816
5-dodecenoate (12:1n7)	33968	39	2.49	0.000288456	0.000482179	0.0282824	0.0569647	0.33177	0.965128	17.425	24.7297
3-hydroxydecanoate	22053	39	2.48	0.000296826	0.000495257	0.640271	1.29398	0.33102	1.31514	60.8431	86.4955
citrate	1564	39	2.48	0.000305318	0.000507556	0.57454	1.16505	0.33027	1.54351	49.1078	69.9299
ergothioneine	37459	39	2.47	0.000317857	0.000525507	0.192543	0.392321	0.32921	0.917419	47.8295	68.2737
ergosterol	27553	39	2.46	0.000340261	0.000560503	0.00676475	0.0138972	0.3274	0.944257	8.71035	12.4846
4-hydroxybutyrate (GHB)	34585	39	2.45	0.00037102	0.000610062	0.0979236	0.203297	0.32509	1.31409	23.8132	34.3115
phenylalanylglycine	41370	39	2.44	0.000385117	0.000630197	0.565506	1.17941	0.32409	1.65836	45.3462	65.4869
palmitate (16:0)	1336	39	2.44	0.000385352	0.000630197	0.0187513	0.0391104	0.32407	0.93601	14.6297	21.1284
valylglycine	40475	39	2.44	0.00038872	0.000634559	1.10544	2.30812	0.32384	2.20197	47.7481	68.9951
arabonate/xylonate	48255	39	2.42	0.000423801	0.000687703	0.0906992	0.19141	0.3215	1.18927	25.3235	36.7877
betaine	3141	39	2.4	0.000474925	0.00076486	0.207765	0.444753	0.3184	1.09144	41.7625	61.1027
3-methylcytidine	35132	39	2.4	0.000475294	0.00076486	0.0592305	0.126805	0.31838	0.975867	24.9392	36.4902
cytidine 2',3'-cyclic monophosphate	37465	39	2.4	0.000486583	0.000781639	0.0486958	0.10456	0.31774	1.68873	13.0673	19.148
1-palmitoleoyl-GPC (16:1)*	33230	39	2.38	0.000532027	0.00085162	1.08887	2.36473	0.31529	4.5022	23.1774	34.1559
galactose 1-phosphate	15706	39	2.38	0.00054629	0.000871371	0.0231667	0.0504822	0.31456	1.05335	14.4496	21.3302
3-hydroxyoctanoate	22001	39	2.37	0.000556464	0.000885971	0.422566	0.922995	0.31404	1.25436	51.8235	76.5912
N-acetylthreonine	33939	39	2.37	0.000577454	0.000914639	0.205558	0.451139	0.31302	1.46945	30.8539	45.7087
N-acetylphenylalanine	33950	39	2.35	0.000642836	0.00101465	0.171782	0.38231	0.31002	1.27817	32.4264	48.3747
10-heptadecenoate (17:1n7)	33971	39	2.34	0.000657226	0.00103376	0.0244497	0.0545723	0.3094	0.916966	17.0523	25.4761
2-hydroxyglutarate	37253	39	2.34	0.000679847	0.00106564	0.137355	0.30795	0.30845	1.3084	28.3258	42.413
1-palmitoyl-GPC (16:0)	33955	39	2.32	0.000733241	0.00114537	0.248773	0.563374	0.30632	2.98673	16.6996	25.1306
tyrosylglycine	41375	39	2.31	0.000803553	0.00124646	0.25378	0.581821	0.30371	1.53478	32.8232	49.699
succinate	1437	39	2.31	0.000804836	0.00124646	0.00769825	0.017653	0.30366	0.931922	9.41491	14.257
1-oleoyl-GPC (18:1)	48258	39	2.3	0.000824296	0.00127442	0.582732	1.3406	0.30298	4.19048	18.2168	27.6303
alpha-hydroxyisocaproate	22132	39	2.27	0.00100306	0.00154817	1.81682	4.29399	0.29731	1.88243	71.604	110.081
2'-deoxyinosine	15076	39	2.27	0.00102762	0.00158338	0.17692	0.41956	0.29661	1.83061	22.977	35.3836
pantethine	39791	39	2.26	0.00104838	0.00161262	0.0333504	0.0793112	0.29602	0.523797	34.8648	53.7656
2-palmitoleoyl-GPC (16:1)*	35819	39	2.26	0.00106719	0.001636	3.14627	7.50093	0.2955	5.7518	30.8386	47.6161
3,4-dihydroxyphenylacetate	18296	39	2.26	0.00108722	0.00166389	0.00884917	0.0211524	0.29496	0.177884	52.8827	81.7603
beta-sitosterol	27414	39	2.25	0.0011169	0.00170355	0.0102657	0.0246319	0.29417	0.945497	10.716	16.5993
choline	15506	39	2.25	0.00113455	0.00172757	0.0280009	0.0673359	0.2937	0.934049	17.915	27.7814
pyruvate	22250	39	2.24	0.00117271	0.00178268	1.65241	3.99244	0.29273	1.91305	67.1942	104.446
S-1-pyrroline-5-carboxylate	42370	39	2.23	0.00125852	0.00190992	0.167024	0.407658	0.29064	1.08933	37.517	58.6121
gamma-glutamylisoleucine*	34456	39	2.23	0.00128722	0.0019502	0.110447	0.27045	0.28997	0.739563	44.9368	70.3184
pentadecanoate (15:0)	1361	39	2.22	0.00135591	0.00204742	0.0156293	0.0385614	0.28841	0.983039	12.7174	19.9759
biliverdin	2137	39	2.19	0.00153141	0.00229219	0.0386979	0.0972036	0.28475	1.20274	16.3558	25.9221
2'-deoxyguanosine	1411	39	2.19	0.00155598	0.00232243	0.0778579	0.196032	0.28427	1.39793	19.9603	31.6722
tricarballylate	15729	39	2.18	0.00165146	0.00245282	1.9678	4.99893	0.28246	2.05355	68.3101	108.876
citrulline	2132	39	2.17	0.00174083	0.00258133	0.579658	1.48431	0.28085	1.19993	63.45	101.533
alpha-hydroxyisovalerate	46537	39	2.17	0.00176196	0.00260616	0.534493	1.37117	0.28048	1.56769	46.6347	74.6937
2-palmitoyl-GPC (16:0)*	35253	39	2.17	0.00176333	0.00260616	3.89867	10.0027	0.28045	5.22252	37.8075	60.5589
linoleate (18:2n6)	1105	39	2.15	0.00197556	0.00291507	0.0111253	0.029046	0.27695	0.916149	11.5131	18.6027
isoleucylglycine	40008	39	2.14	0.00208451	0.00307084	0.295376	0.777634	0.27528	1.9631	27.6851	44.9206
1-palmitoyl-GPG (16:0)*	45970	39	2.13	0.00223814	0.00328647	0.659763	1.75648	0.27305	2.8875	28.1301	45.8985
thymidine	2183	39	2.12	0.00234186	0.00343321	0.127695	0.342413	0.27163	1.81899	19.6452	32.1696
oleate/vaccenate (18:1)	52285	39	2.12	0.00239177	0.00350071	0.0168146	0.0452405	0.27096	0.953028	13.6062	22.3182
undecanedioate	42395	39	2.08	0.00288121	0.00419674	0.0300655	0.0833788	0.26502	0.918722	18.8734	31.43
7-methylguanosine	31580	39	2.08	0.00289488	0.00420989	0.0781507	0.216901	0.26487	1.30382	21.4412	35.7201
gamma-aminobutyrate (GABA)	1416	39	2.06	0.00318416	0.00460839	0.00990096	0.0279196	0.26179	0.881044	11.2938	18.9652
2-methylcitrate	37483	39	2.06	0.00322121	0.00465458	0.0822986	0.232526	0.26141	1.15583	24.82	41.7197
N-acetylvaline	1591	39	2.06	0.0032499	0.0046811	0.120608	0.341275	0.26112	1.3738	25.2793	42.5235
glutamate, gamma-methyl ester	33487	39	2.03	0.00388968	0.00555844	0.0468919	0.136848	0.25521	0.991777	21.8341	37.2997
stearoylcarnitine	34409	39	2.02	0.00399372	0.00569812	0.012596	0.0369302	0.25433	1.0548	10.6401	18.2188
guanosine-2',3'-cyclic monophosphate	37139	39	2.02	0.00417346	0.00594521	0.0431327	0.127447	0.25286	1.56921	13.2349	22.7501
threonylphenylalanine	31530	39	1.99	0.00468435	0.00665207	0.253711	0.765342	0.24897	1.51637	33.2173	57.6929
margarate (17:0)	1121	39	1.99	0.00475796	0.00674603	0.0176925	0.0535221	0.24844	1.00256	13.2674	23.0758
2-phosphoglycerate	35629	39	1.98	0.00509869	0.00720657	0.777668	2.38255	0.24608	1.60726	54.867	96.0363
1,2-dilinoleoyl-galactosylglycerol (18:2/18:2)*	54899	39	1.97	0.00548547	0.00770518	0.552658	1.71636	0.24357	2.89427	25.6855	45.2653
stearate (18:0)	1358	39	1.96	0.00569566	0.00798803	0.013169	0.0411885	0.24227	0.932422	12.3073	21.7659
beta-alanine	55	39	1.96	0.0057982	0.00810674	0.012208	0.0383119	0.24165	0.889737	12.4183	21.9991
cytidine 5'-diphosphocholine	34418	39	1.94	0.00621359	0.00863422	0.126695	0.402891	0.23923	0.805569	44.1852	78.7936
N-acetylasparagine	33942	39	1.94	0.00624774	0.00866839	0.190052	0.605004	0.23904	1.17437	37.1221	66.2332
1-linoleoyl-GPC (18:2)	34419	39	1.94	0.00631329	0.00874593	0.524386	1.67268	0.23868	4.2796	16.9209	30.2206
N-acetylarginine	33953	39	1.94	0.00635518	0.00879052	0.0806414	0.257557	0.23844	0.914173	31.0635	55.5148
guanine	32352	39	1.93	0.0065826	0.00909121	0.0717077	0.230592	0.23721	1.38058	19.3964	34.7825
gluconate	587	39	1.92	0.00693527	0.00953468	0.275822	0.896087	0.23536	1.62775	32.2646	58.155
uridine-2',3'-cyclic monophosphate	37137	39	1.88	0.00859099	0.011722	0.0317379	0.107666	0.22767	1.67655	10.6261	19.5714
linolenate [alpha or gamma; (18:3n3 or 6)]	34035	39	1.88	0.00892217	0.0121192	0.00820924	0.0280685	0.22629	0.832893	10.8783	20.115
beta-hydroxyisovalerate	12129	39	1.87	0.00909836	0.01234	0.0748276	0.256895	0.22557	0.819426	33.3827	61.8541
biotin	568	39	1.87	0.00954227	0.0129034	0.0831063	0.288201	0.22382	1.28893	22.3659	41.6502
phenyllactate (PLA)	22130	39	1.86	0.00956897	0.0129203	4.40504	15.2852	0.22372	2.30809	90.9332	169.388
myristate (14:0)	1365	39	1.82	0.0119966	0.0160308	0.00591782	0.0215746	0.21525	0.847724	9.07457	17.3267
13-HODE + 9-HODE	37752	39	1.82	0.0123797	0.0164941	0.0146441	0.0537685	0.21406	0.900556	13.4376	25.7486
palmitoleate (16:1n7)	33447	39	1.79	0.014078	0.0186472	0.00618005	0.0233742	0.20911	0.868152	9.05525	17.6106
3-ketosphinganine	34381	39	1.77	0.01606	0.0211488	0.307299	1.19946	0.20395	1.5988	34.6726	68.5013
hippurate	15753	39	1.76	0.0168637	0.0221748	0.123959	0.48967	0.20201	0.704875	49.9491	99.275
phosphopantetheine	15504	39	1.75	0.0178103	0.0233519	0.0488712	0.195697	0.19983	0.515185	42.9105	85.8675
methylphosphate	37070	39	1.75	0.017912	0.0234512	0.0142679	0.0572154	0.1996	0.943178	12.6645	25.3608
oxalate (ethanedioate)	20694	39	1.75	0.0179899	0.0235193	0.064006	0.256949	0.19942	1.17428	21.5446	43.167
N-acetylputrescine	37496	39	1.75	0.0180496	0.0235633	0.0246754	0.0991408	0.19929	0.622234	25.2452	50.6025
docosadienoate (22:2n6)	32415	39	1.73	0.0199803	0.0259343	0.109511	0.451587	0.19517	1.39466	23.728	48.184
sphinganine	17769	39	1.71	0.0215137	0.0278051	0.20186	0.848737	0.19214	1.78419	25.1816	51.6351
mevalonate	39583	39	1.71	0.021685	0.0279866	0.0025474	0.0107334	0.19181	0.161268	31.297	64.2425
fructose	48195	39	1.7	0.0228578	0.0294583	0.0364006	0.15556	0.18963	1.06137	17.9758	37.1607
trigonelline (N'-methylnicotinate)	32401	39	1.7	0.0230903	0.0297157	0.0372258	0.159525	0.1892	0.988839	19.5118	40.3913
phenylalanylalanine	41374	39	1.69	0.0244973	0.0313926	0.621788	2.7082	0.18672	2.20378	35.781	74.6744
1-linoleoyl-2-linolenoyl-galactosylglycerol (18:2/18:3)*	54898	39	1.68	0.0257906	0.0330032	0.219855	0.971461	0.18455	1.66641	28.1376	59.1469
adenosine	555	39	1.67	0.0264596	0.033764	0.0138392	0.061596	0.18346	1.04926	11.2118	23.6535
1-(1-enyl-palmitoyl)-2-linoleoyl-GPE (P-16:0/18:2)*	52677	39	1.67	0.0270199	0.034382	0.00470908	0.0210851	0.18256	0.403902	16.9899	35.951
2-hydroxy-3-methylvalerate	36746	39	1.67	0.0270743	0.0344029	1.37648	6.1668	0.18248	1.71393	68.4528	144.889
N-acetylcysteine	1586	39	1.66	0.0277599	0.0352247	0.100449	0.453278	0.18141	0.767107	41.3159	87.766
2'-deoxyuridine	1412	39	1.66	0.0284189	0.0360105	0.18809	0.854562	0.1804	1.64381	26.3834	56.2368
cytidine 3'-monophosphate (3'-CMP)	2959	39	1.64	0.0312509	0.0394336	0.157306	0.735127	0.17627	1.54948	25.5968	55.3343
carnitine	15500	39	1.62	0.0354709	0.044449	0.0138253	0.0671872	0.17066	0.886917	13.2573	29.2254
N-methylalanine	37069	39	1.61	0.0369149	0.046131	0.0373829	0.183997	0.16886	0.806671	23.9685	53.1751
2-palmitoleoylglycerol (16:1)*	52432	39	1.59	0.0404912	0.0504608	0.0654382	0.331977	0.16466	1.35717	18.8487	42.4542
4-methyl-2-oxopentanoate	22116	39	1.57	0.0453789	0.0563968	0.202455	1.06781	0.15938	2.12681	21.1561	48.5868
nicotinamide riboside	33013	39	1.57	0.0454413	0.0563971	0.0113368	0.0598226	0.15932	0.907651	11.7308	26.9472
4-imidazoleacetate	32349	39	1.56	0.0479905	0.0594793	0.034075	0.183314	0.15675	1.11331	16.5807	38.4577
succinimide	41888	39	1.55	0.0506581	0.0626998	0.0192538	0.10563	0.15417	0.977712	14.1921	33.2417
propionylglycine	31932	39	1.54	0.0514325	0.0634848	0.291101	1.60598	0.15345	1.33924	40.2869	94.6263
methyl glucopyranoside (alpha + beta)	46144	39	1.53	0.0550942	0.067912	0.050289	0.28469	0.15013	1.10037	20.3797	48.4895
methylmalonate (MMA)	1496	39	1.52	0.0590228	0.0725572	0.269621	1.56762	0.14675	1.42683	36.392	87.7504
gulonic acid*	46957	39	1.51	0.0619049	0.0758942	0.0193216	0.114493	0.14439	1.10201	12.6135	30.7045
nicotinamide	594	39	1.5	0.0637182	0.0779064	0.0239185	0.143404	0.14295	0.952071	16.2442	39.7751
heme	41754	39	1.47	0.0749715	0.0914189	0.111049	0.71364	0.13466	1.62348	20.5263	52.0348
3-hydroxysebacate	31943	39	1.46	0.0763568	0.0929828	0.384514	2.49137	0.1337	1.39585	44.424	113.079
1-palmitoyl-GPI (16:0)*	35305	39	1.45	0.081369	0.0988208	0.0650683	0.434059	0.13036	1.52306	16.7481	43.257
1-linoleoyl-GPG (18:2)*	54885	39	1.44	0.0848839	0.102677	0.694364	4.72545	0.12812	3.1497	26.456	69.0165
N2,N2-dimethylguanosine	35137	39	1.44	0.0858235	0.103675	0.030322	0.207448	0.12753	0.93532	18.6174	48.6961
phosphate	42109	39	1.44	0.0859612	0.103684	0.00161037	0.0110258	0.12744	1.07006	3.7502	9.81291
glycine	58	39	1.42	0.0946267	0.11358	0.0128243	0.0920919	0.12223	1.05851	10.6985	28.6692
1-(1-enyl-palmitoyl)-2-oleoyl-GPE (P-16:0/18:1)*	52477	39	1.42	0.0946502	0.11358	0.00042363	0.00304249	0.12222	0.09573	21.5003	57.6191
ribulose/xylulose	54671	39	1.41	0.0969416	0.116023	0.0139195	0.101209	0.1209	1.05868	11.1442	30.0501
mevalonolactone	48118	39	1.4	0.102649	0.12253	0.000670541	0.00502534	0.11772	0.106442	24.3275	66.599
lanthionine	42002	39	1.4	0.103847	0.123797	0.358948	2.70707	0.11707	1.67627	35.7414	98.1534
methylsuccinate	15745	39	1.39	0.108027	0.128454	0.0182897	0.140966	0.11484	1.0265	13.1748	36.5761
N6-acetyllysine	36752	39	1.36	0.121105	0.143614	0.0762783	0.628312	0.10826	2.09778	13.1656	37.7856
uridine	606	39	1.35	0.129928	0.153876	0.0092473	0.0795823	0.1041	1.39763	6.8804	20.1843
1-palmitoyl-GPA (16:0)	34428	39	1.33	0.138562	0.16346	0.102087	0.91651	0.10022	1.33755	23.8877	71.5745
1-oleoyl-GPA (18:1)	36812	39	1.32	0.147003	0.172296	0.0533436	0.498914	0.09659	0.940963	24.5453	75.0655
erythritol	20699	39	1.3	0.157892	0.183869	0.0376369	0.37095	0.09211	1.08963	17.8044	55.8958
2-ketogluconate	48370	39	1.3	0.158391	0.184214	0.828209	8.18246	0.09191	2.18557	41.6395	130.881
2,3-dihydroxyisovalerate	38276	39	1.3	0.163428	0.189828	0.402079	4.06951	0.08992	1.81111	35.0116	111.385
1-palmitoyl-2-linoleoyl-galactosylglycerol (16:0/18:2)*	54901	39	1.29	0.169018	0.195818	0.00309909	0.0322176	0.08775	0.168568	33.025	106.481
azelate (nonanedioate)	18362	39	1.29	0.171553	0.198502	0.00461873	0.0486022	0.08678	0.768089	8.8481	28.7023
malonate	15872	39	1.28	0.176765	0.204011	0.00880559	0.0950029	0.08483	1.09219	8.59176	28.221
cytosine	573	39	1.24	0.203462	0.233338	5.83727	71.645	0.07534	3.23203	74.7532	261.889
3-hydroxybutyrate (BHBA)	542	39	1.24	0.210756	0.241397	0.00859776	0.109368	0.07288	1.14941	8.06713	28.7722
stearidonate (18:4n3)	33969	39	1.22	0.224965	0.256376	0.00697495	0.095224	0.06825	0.766513	10.8956	40.2581
N-acetyl-1-methylhistidine*	43255	39	1.22	0.227441	0.258547	0.0224469	0.3103	0.06746	1.04226	14.3749	53.4461
methyl-4-hydroxybenzoate	34386	39	1.22	0.228414	0.259327	0.038383	0.533212	0.06715	1.27262	15.3947	57.3789
1-methylimidazoleacetate	32350	39	1.21	0.231378	0.262364	0.0537167	0.757535	0.06621	1.04884	22.0975	82.9832
4-hydroxybenzoate	21133	39	1.2	0.247292	0.278665	0.103436	1.58379	0.06131	1.35351	23.7615	92.9794
aconitate [cis or trans]	46173	39	1.19	0.248447	0.279619	0.0111202	0.171309	0.06096	1.18369	8.90875	34.9664
erucate (22:1n9)	1552	39	1.18	0.26258	0.294792	0.00299065	0.0497029	0.05676	0.770514	7.09745	28.9341
4-hydroxyphenylpyruvate	1669	39	1.18	0.2646	0.296693	0.0450346	0.756787	0.05617	1.26097	16.8294	68.9894
2-hydroxybutyrate/2-hydroxyisobutyrate	52281	39	1.17	0.268553	0.300753	0.0104198	0.178971	0.05502	0.79201	12.8884	53.4147
2-keto-3-deoxy-gluconate	48141	39	1.17	0.276157	0.307747	0.0671636	1.20403	0.05284	1.2248	21.1592	89.5884
N6-succinyladenosine	48130	39	1.15	0.290638	0.323487	0.0434786	0.848131	0.04876	1.28534	16.2226	71.6495
3-phosphoglycerate	1414	39	1.13	0.316543	0.349316	0.0854693	1.96278	0.04173	1.57071	18.6127	89.1946
3-(4-hydroxyphenyl)lactate	32197	39	1.12	0.331954	0.365432	0.122916	3.13994	0.03767	0.982853	35.671	180.29
N-acetylglycine	27710	39	1.1	0.349864	0.383749	0.00666569	0.194961	0.03306	1.05498	7.73885	41.8531
carboxyethyl-GABA	40007	39	1.09	0.362701	0.397349	0.0551947	1.79609	0.02981	1.36669	17.19	98.0602
oxaloacetate	47173	39	1.09	0.37011	0.404487	0.0769043	2.67343	0.02796	1.17517	23.5979	139.134
2-linoleoylglycerol (18:2)	32506	39	1.06	0.406577	0.442207	0.00593603	0.305988	0.01903	1.34856	5.71317	41.0187
gamma-glutamylglutamate	36738	39	1.05	0.413004	0.448659	0.00576385	0.323906	0.01748	0.757474	10.0228	75.1349
1-stearoyl-2-oleoyl-GPE (18:0/18:1)	42448	39	1.04	0.437733	0.474386	0.00638731	0.544509	0.01159	2.09793	3.80949	35.1731
N1-methylinosine	48351	39	1.03	0.451791	0.488991	0.00250328	0.29971	0.00828	0.632989	7.90421	86.4877
2-isopropylmalate	15667	39	1.02	0.45229	0.488991	0.0313984	3.81353	0.00817	1.76236	10.0545	110.807
N-acetylmethionine	1589	39	1.01	0.472415	0.507119	0.00739163	2.12767	0.00346	1.869	4.60002	78.0445
quinate	18335	39	1.01	0.479397	0.514005	0.000625477	0.339714	0.00184	1.13088	2.21151	51.5395
1-palmitoyl-2-stearoyl-GPC (16:0/18:0)	52616	39	1	0.480653	0.514742	0.000608127	0.392736	0.00155	1.43957	1.71302	43.5327
1-linoleoyl-GPA (18:2)*	52690	39	1	0.490536	0.524087	-0.00508681	6.81535	0	3.33445	2.13894	78.2925
1-palmitoyl-2-linolenoyl-galactosylglycerol (16:0/18:3)*	54900	39	0.99	0.50501	0.53882	-6.7267e-05	0.0164859	0	0.0786467	10.4285	163.259
1-oleoyl-GPI (18:1)*	36602	39	0.97	0.52395	0.557158	-0.0356002	4.23769	0	2.73103	6.90875	75.3769
N-alpha-acetylornithine	32984	39	0.96	0.549174	0.583296	-0.0026996	0.191489	0	1.01123	5.13806	43.2734
guanosine	1573	39	0.94	0.568362	0.602264	-0.00377998	0.205425	0	1.37195	4.48133	33.0361
xanthopterin	54728	39	0.91	0.616916	0.648016	-0.0803609	2.74795	0	1.38944	20.4025	119.307
3-hydroxysuberate	31936	39	0.91	0.623583	0.653528	-0.0992618	3.22967	0	0.979048	32.1801	183.559
3-methyl-2-oxovalerate	15676	39	0.87	0.675968	0.703939	-0.103195	2.42533	0	2.03782	15.7639	76.4223
saccharopine	1495	39	0.87	0.677795	0.704638	-0.0252329	0.587278	0	0.912449	17.409	83.9872
galactonate	27719	39	0.87	0.678194	0.704638	-0.0726684	1.68773	0	1.27745	21.1023	101.697
1-(1-enyl-palmitoyl)-2-oleoyl-GPC (P-16:0/18:1)*	52478	39	0.84	0.717937	0.740832	-2.79288e-05	0.00053433	0	0.02286	23.118	101.118
1-palmitoleoyl-2-linolenoyl-GPC (16:1/18:3)*	53180	39	0.82	0.744158	0.765275	-0.064432	1.1007	0	1.84325	13.7711	56.9182
benzoate	15778	39	0.78	0.804255	0.823339	-0.0258013	0.349479	0	0.807917	19.8817	73.1718
1-linoleoylglycerol (18:2)	27447	39	0.78	0.805788	0.823977	-0.0508909	0.685483	0	1.9818	11.3831	41.7771
homoserine lactone	15696	39	0.73	0.855516	0.872858	-0.00826496	0.0933094	0	0.467439	19.4489	65.3488
1-stearoyl-GPC (18:0)	33961	39	0.7	0.886949	0.902894	-0.155055	1.56641	0	2.44057	16.1343	51.2815
inosine	1123	39	0.67	0.915688	0.929018	-0.0103057	0.0936254	0	0.957418	10.6032	31.9592
1-linolenoyl-GPC (18:3)*	45951	39	0.66	0.920237	0.932589	-0.131971	1.17801	0	1.75751	20.67	61.7558
malate	1303	39	0.61	0.955414	0.967157	-0.234046	1.79536	0	1.40457	34.4437	95.3968
1-stearoyl-2-oleoyl-GPC (18:0/18:1)	52438	39	0.49	0.992667	0.999284	-0.152259	0.889874	0	1.7232	22.6442	54.7432
glycerol 2-phosphate	27728	39	0	1	1	-3.5498e-19	5.97095e-17	0	0.5914	1.00744e-07	1.30659e-06
mevalonate 5-phosphate	38627	39	0	1	1	-1.67365e-19	3.73184e-18	0	0.1619	2.52688e-07	1.1932e-06
1-(1-enyl-palmitoyl)-2-linoleoyl-GPC (P-16:0/18:2)*	52682	39	0	1	1	0	-2.9155e-18	0	0.0253	0	6.74895e-06
1-(1-enyl-palmitoyl)-2-palmitoleoyl-GPC (P-16:0/16:1)*	52713	39	0	1	1	-6.77569e-20	1.49274e-17	0	0.258	1.00892e-07	1.49752e-06

## Sheet: B. Males
Metabolite	Metabolite ID	DF	F Value	P-value	FDR	Var Component Line	Var Component Rep[Line]	Heritability	Mean of Response	CV Line	CV Rep[Line]
pipecolate	1444	39	270.81	7.68e-71	6.96e-68	2455.31	27.3002	0.989	12.3254	402.024	42.3919
7-methylguanine	35114	39	148.41	1.5e-60	4.54e-58	2.53827	0.0516562	0.98005	1.29391	123.13	17.5653
N6,N6,N6-trimethyllysine	1498	39	115.38	2.84e-56	6.43e-54	3.86213	0.1013	0.97444	0.583555	336.769	54.5409
3-aminoisobutyrate	1566	39	94.3	7.22e-53	1.09e-50	10.0312	0.322529	0.96885	1.11764	283.383	50.8139
sepiapterin	48139	39	79.55	5.19e-50	4.77e-48	0.406153	0.0155122	0.96321	1.85101	34.43	6.72865
xanthurenate	15679	39	57.3	1.48e-44	1.12e-42	0.164055	0.0087418	0.94941	1.03118	39.2791	9.06707
putrescine	1408	39	54.72	8.49e-44	5.91e-42	1.49337	0.0833973	0.94711	2.78414	43.8927	10.3725
phosphoethanolamine	1600	39	48.82	6.34e-42	3.83e-40	0.219962	0.0138002	0.94096	1.13407	41.3556	10.3587
choline phosphate	34396	39	39.02	2.76e-38	1.56e-36	0.048231	0.00380615	0.92686	0.892761	24.5996	6.91048
1-methylhistamine	43831	39	35.5	9.03e-37	4.81e-35	1.09126	0.0948836	0.92001	1.66993	62.5557	18.4458
pterin	43023	39	30.81	1.63e-34	7.38e-33	0.300682	0.0302636	0.90855	1.32092	41.5122	13.1699
N2,N2-dimethylguanine	37081	39	28.72	2.06e-33	8.48e-32	0.726778	0.0786422	0.90236	2.30489	36.9871	12.1668
myo-inositol	1124	39	26.84	2.37e-32	9.33e-31	0.300308	0.0348645	0.89598	1.94428	28.1854	9.60356
taurine	2125	39	26.18	5.82e-32	2.11e-30	0.0622251	0.00741503	0.89352	1.20473	20.7058	7.14771
methionine sulfoxide	18374	39	23.93	1.42e-30	4.94e-29	0.0999908	0.0130814	0.88431	0.635335	49.7711	18.0021
1-(1-enyl-palmitoyl)-2-linoleoyl-GPC (P-16:0/18:2)*	52682	39	23.45	2.91e-30	9.43e-29	0.0927513	0.0123954	0.88211	1.01839	29.9053	10.9325
3-hydroxykynurenine	22110	39	22.07	2.47e-29	7.45e-28	0.134845	0.0192013	0.87535	1.27949	28.7	10.83
cytidine 5'-monophosphate (5'-CMP)	2372	39	21.73	4.25e-29	1.24e-27	0.807839	0.11692	0.87357	0.638004	140.877	53.5947
biopterin	12358	39	20.23	5.13e-28	1.45e-26	0.120944	0.0188696	0.86504	1.61905	21.4799	8.4844
2'-O-methylguanosine	36811	39	18.82	6.14e-27	1.64e-25	0.193053	0.0324947	0.85593	1.46492	29.9932	12.3053
S-adenosylmethionine (SAM)	15915	39	17.51	7.3e-26	1.89e-24	0.0632554	0.0114968	0.8462	0.95491	26.3382	11.2286
N-acetyl-beta-alanine	37432	39	17.29	1.12e-25	2.82e-24	0.363412	0.0669417	0.84445	1.0198	59.1135	25.3709
isoxanthopterin	27732	39	16.84	2.72e-25	6.49e-24	1.25737	0.238182	0.84074	3.94309	28.4378	12.3771
gamma-tocopherol/beta-tocopherol	52473	39	16.28	8.5e-25	1.97e-23	0.492897	0.0967946	0.83586	1.25659	55.8708	24.7589
pantothenate	1508	39	16.11	1.2e-24	2.73e-23	0.0438994	0.00871682	0.83433	0.901803	23.2336	10.353
nicotinamide ribonucleotide (NMN)	22152	39	15.39	5.45e-24	1.2e-22	160.314	33.4106	0.82754	3.89769	324.846	148.298
sarcosine	1516	39	15.35	5.95e-24	1.25e-22	1.29334	0.270313	0.82713	1.85168	61.4172	28.0781
alpha-tocotrienol	37502	39	14.37	5.26e-23	9.72e-22	0.436743	0.0979851	0.81676	1.10169	59.9863	28.4131
urate	1604	39	14.1	9.9e-23	1.79e-21	0.054348	0.0124497	0.81362	1.30035	17.928	8.58065
N1-methyladenosine	15650	39	13.68	2.62e-22	4.65e-21	0.0553851	0.0131022	0.80869	0.917152	25.6599	12.4805
laurate (12:0)	1645	39	13.02	1.31e-21	2.15e-20	0.129833	0.0324134	0.80022	1.08425	33.2324	16.6047
kynurenate	1417	39	12.97	1.48e-21	2.35e-20	0.121278	0.0304021	0.79956	0.814609	42.7505	21.4044
3-hydroxybutyrylcarnitine (2)	52984	39	12.94	1.57e-21	2.45e-20	0.266931	0.0670514	0.79924	1.10387	46.8037	23.4577
tetradecanedioate	35669	39	12.91	1.7e-21	2.53e-20	0.404383	0.101866	0.79878	1.17684	54.0353	27.1204
trans-4-hydroxyproline	32306	39	12.75	2.54e-21	3.71e-20	402.198	102.696	0.7966	5.67216	353.567	178.66
9,10-DiHOME	38399	39	12.46	5.23e-21	7.4e-20	0.141829	0.0371146	0.79259	1.0428	36.1145	18.4745
myristoleate (14:1n5)	32418	39	12.4	6.1e-21	8.5e-20	0.171898	0.0452213	0.79172	1.33411	31.0774	15.9397
cystathionine	15705	39	12.3	7.96e-21	1.08e-19	0.214523	0.0569518	0.79021	1.18416	39.1134	20.1531
1-methylurate	34395	39	12.1	1.32e-20	1.74e-19	0.101391	0.0273918	0.7873	1.25613	25.3492	13.1757
1-(1-enyl-palmitoyl)-2-palmitoleoyl-GPC (P-16:0/16:1)*	52713	39	11.86	2.53e-20	3.22e-19	0.406234	0.112235	0.78353	1.07155	59.4804	31.2644
dihydrobiopterin	35129	39	11.73	3.59e-20	4.51e-19	0.0866638	0.0242374	0.78145	1.44295	20.4017	10.7892
panose	37284	39	10.8	4.64e-19	5.68e-18	0.111278	0.0340666	0.76561	0.868961	38.3887	21.2405
histamine	1574	39	10.78	4.85e-19	5.86e-18	0.0399594	0.0122525	0.76533	1.13957	17.5415	9.71338
2-phosphoglycerate	35629	39	10.67	6.64e-19	7.81e-18	0.22543	0.0699077	0.7633	0.24443	194.246	108.17
2-aminooctanoate	43343	39	10.35	1.71e-18	1.89e-17	0.368552	0.118266	0.75706	1.24361	48.8162	27.6531
kynurenine	15140	39	10.34	1.76e-18	1.92e-17	0.0766382	0.0246195	0.75686	0.654307	42.3098	23.9805
S-adenosylhomocysteine (SAH)	42382	39	10.31	1.94e-18	2.09e-17	0.187713	0.0605113	0.75622	0.933167	46.4289	26.3608
xanthine	3147	39	9.85	7.69e-18	7.75e-17	0.0769794	0.0261061	0.74675	1.1454	24.2231	14.1063
myristoylcarnitine	33952	39	9.82	8.45e-18	8.41e-17	3.78375	1.28764	0.7461	1.99239	97.6307	56.9537
gamma-glutamylmethionine	44872	39	9.75	1.03e-17	1.02e-16	0.789774	0.270787	0.74468	0.920941	96.4983	56.5044
proline	1898	39	9.64	1.46e-17	1.38e-16	0.0226688	0.00787251	0.74223	1.02156	14.7384	8.68544
valylleucine	39994	39	9.64	1.47e-17	1.38e-16	0.262751	0.0912757	0.74218	0.599731	85.4704	50.3757
1-palmitoleoyl-2-oleoyl-glycerol (16:1/18:1)*	52632	39	9.42	2.89e-17	2.67e-16	0.0543542	0.0193691	0.73727	0.696689	33.464	19.9763
N-acetylmethionine sulfoxide	45428	39	9.17	6.33e-17	5.62e-16	0.0590005	0.0216586	0.73148	0.479505	50.6564	30.6918
dimethylarginine (SDMA + ADMA)	36808	39	9	1.11e-16	9.59e-16	0.0619774	0.0232477	0.72722	0.613974	40.5477	24.8336
phosphoenolpyruvate (PEP)	597	39	8.99	1.13e-16	9.7e-16	0.471152	0.17687	0.72706	0.736829	93.1566	57.0769
glucose	48152	39	8.77	2.31e-16	1.94e-15	0.0307677	0.011872	0.72157	0.946072	18.5406	11.5169
maltose	15586	39	8.58	4.38e-16	3.51e-15	0.141025	0.0557938	0.71652	1.03912	36.1397	22.7315
N6-carboxymethyllysine	36713	39	8.55	4.86e-16	3.83e-15	0.0572062	0.0227258	0.71569	1.0104	23.6716	14.9199
N-acetylglucosamine 6-phosphate	15107	39	8.4	8.08e-16	6.26e-15	0.0639016	0.0258995	0.71159	0.658506	38.3881	24.4391
maltopentaose	35163	39	8.37	9.13e-16	6.89e-15	0.160912	0.0655346	0.7106	0.957543	41.8924	26.7348
histidine	59	39	8.27	1.26e-15	9.28e-15	0.0387681	0.015993	0.70795	0.968832	20.3231	13.0532
adenine	554	39	8.11	2.22e-15	1.59e-14	0.291964	0.123206	0.70324	1.34709	40.1113	26.0566
1-methyladenine	1527	39	8.04	2.83e-15	2.02e-14	0.112916	0.0481179	0.70119	1.35855	24.7345	16.1465
pyroglutamine*	46225	39	8.02	3.05e-15	2.16e-14	0.63809	0.272749	0.70055	1.03287	77.3388	50.5636
isomaltose	39777	39	7.97	3.6e-15	2.53e-14	0.0489242	0.0210542	0.69913	0.757307	29.2072	19.1601
2'-deoxyuridine	1412	39	7.92	4.34e-15	3.02e-14	0.0679209	0.0294517	0.69754	0.54136	48.141	31.7007
sedoheptulose	53237	39	7.82	6.09e-15	4.15e-14	0.0336023	0.0147741	0.6946	0.832242	22.026	14.605
orotate	1505	39	7.74	8.23e-15	5.48e-14	0.126249	0.0561988	0.69197	1.26447	28.1001	18.748
N-acetyl-glucosamine 1-phosphate	15741	39	7.7	9.32e-15	6.16e-14	0.0417616	0.0186857	0.69088	0.977196	20.9126	13.9885
lactosyl-N-palmitoyl-sphingosine	53010	39	7.69	9.76e-15	6.41e-14	0.18083	0.0810644	0.69047	0.843627	50.4063	33.7493
N-monomethylarginine	43586	39	7.69	1e-14	6.52e-14	0.0698226	0.0313327	0.69025	0.640777	41.2374	27.6244
1-(1-enyl-stearoyl)-2-oleoyl-GPE (P-18:0/18:1)	52614	39	7.68	1.01e-14	6.55e-14	0.0234291	0.0105189	0.69015	1.08013	14.171	9.49529
cysteinylglycine	35637	39	7.56	1.6e-14	1.01e-13	0.36291	0.166079	0.68604	1.07578	55.9985	37.8821
1-oleoyl-3-linoleoyl-glycerol (18:1/18:2)	46799	39	7.55	1.61e-14	1.01e-13	0.0282471	0.0129285	0.68602	0.520893	32.2655	21.8286
3,4-dihydroxyphenylacetate	18296	39	7.45	2.36e-14	1.46e-13	0.366438	0.170429	0.68255	1.33004	45.513	31.039
tryptophan	54	39	7.44	2.48e-14	1.51e-13	0.0312029	0.0145408	0.68212	0.858189	20.5833	14.0511
pseudouridine	33442	39	7.36	3.3e-14	1.99e-13	0.0397364	0.0187435	0.67949	0.818916	24.3419	16.718
1-oleoyl-2-linoleoyl-glycerol (18:1/18:2)	46798	39	7.31	4.05e-14	2.41e-13	0.0968438	0.0460786	0.6776	0.943994	32.966	22.7395
propionylcarnitine	32452	39	7.29	4.34e-14	2.56e-13	0.924497	0.441182	0.67695	1.62626	59.1237	40.843
sedoheptulose-7-phosphate	35649	39	7.2	6.08e-14	3.49e-13	0.0642244	0.0310913	0.67381	1.08249	23.4113	16.289
valylglutamine	42079	39	7.13	7.86e-14	4.42e-13	0.110868	0.0542662	0.67138	0.34645	96.1088	67.2394
N-acetylalanine	1585	39	7.11	8.46e-14	4.73e-13	0.0186965	0.0091802	0.67069	0.705815	19.3726	13.5749
glycylleucine	34398	39	7.02	1.18e-13	6.5e-13	0.026205	0.0130551	0.66747	0.614134	26.359	18.6049
glycerophosphoglycerol	48857	39	6.96	1.51e-13	8.2e-13	0.0897372	0.0451823	0.66512	1.83304	16.3423	11.5961
3-hydroxylaurate	32457	39	6.91	1.79e-13	9.59e-13	0.105626	0.0535743	0.66348	1.01661	31.9691	22.7679
2'-deoxycytidine	15949	39	6.85	2.32e-13	1.21e-12	0.00266769	0.00136849	0.66094	0.157214	32.8531	23.5304
linoleoylcarnitine*	46223	39	6.8	2.75e-13	1.41e-12	0.332693	0.171967	0.65924	1.14281	50.4718	36.2869
valylglycine	40475	39	6.78	2.98e-13	1.5e-12	0.0693369	0.0359642	0.65846	0.695747	37.8469	27.2574
glycylisoleucine	36659	39	6.78	2.98e-13	1.5e-12	0.0232079	0.0120379	0.65846	0.707544	21.531	15.5068
12,13-DiHOME	38395	39	6.72	3.82e-13	1.9e-12	0.0517514	0.0271406	0.65598	1.03033	22.0792	15.9894
mevalonate 5-phosphate	38627	39	6.7	4.14e-13	2.04e-12	0.194653	0.102451	0.65517	1.07538	41.027	29.7644
tyrosine	1299	39	6.65	5.04e-13	2.47e-12	0.307425	0.163224	0.65319	1.30863	42.3694	30.8728
xanthosine	15136	39	6.63	5.39e-13	2.61e-12	100.97	53.7697	0.65251	4.04971	248.126	181.069
alanylleucine	37093	39	6.58	6.77e-13	3.26e-12	0.103265	0.0555574	0.65019	0.71684	44.8284	32.8813
palmitoleoylcarnitine*	53223	39	6.47	1.02e-12	4.79e-12	2.05509	1.12632	0.64597	1.7355	82.602	61.1513
1-palmitoleoyl-3-oleoyl-glycerol (16:1/18:1)*	52631	39	6.38	1.47e-12	6.85e-12	0.015049	0.00838493	0.64219	0.368581	33.2829	24.8437
5-aminolevulinate	2290	39	6.32	1.91e-12	8.84e-12	0.208245	0.117454	0.63938	1.09332	41.7389	31.3465
glycerol	15122	39	6.31	1.95e-12	8.96e-12	0.123687	0.0698216	0.63918	1.43621	24.4875	18.3983
5-dodecenoate (12:1n7)	33968	39	6.26	2.47e-12	1.12e-11	0.138235	0.0788923	0.63665	1.211	30.7018	23.1938
fumarate	1643	39	6.24	2.7e-12	1.22e-11	0.0190968	0.0109433	0.63571	0.891475	15.5014	11.7345
N-acetylhistidine	33946	39	6.16	3.73e-12	1.67e-11	0.0995799	0.0579302	0.63221	0.914337	34.5128	26.3237
asparagine	512	39	6.06	5.57e-12	2.45e-11	0.0146844	0.00870465	0.62783	0.739922	16.3773	12.6093
N-acetylaspartate (NAA)	22185	39	6.05	5.89e-12	2.58e-11	7.0327	4.18014	0.6272	1.91519	138.468	106.754
glucose 6-phosphate	31260	39	6.01	6.92e-12	3.01e-11	0.178598	0.106965	0.62542	1.01065	41.8155	32.3608
glutarate (pentanedioate)	396	39	5.96	8.4e-12	3.61e-11	0.295845	0.178832	0.62326	1.16292	46.7716	36.3641
glucose 1-phosphate	15561	39	5.95	8.84e-12	3.78e-11	0.113407	0.0687169	0.62269	1.02394	32.8885	25.6009
serine	1648	39	5.92	9.96e-12	4.24e-11	0.0149548	0.00911367	0.62134	0.760585	16.0784	12.5516
biliverdin	2137	39	5.78	1.87e-11	7.69e-11	0.0709004	0.0445381	0.61418	0.823171	32.347	25.6375
pantethine	39791	39	5.77	1.93e-11	7.89e-11	0.133819	0.0842049	0.61378	0.889364	41.1319	32.6279
methylmalonate (MMA)	1496	39	5.73	2.27e-11	9.15e-11	0.424617	0.269298	0.61191	1.2162	53.579	42.669
thymidine	2183	39	5.73	2.32e-11	9.3e-11	0.0377222	0.0239478	0.61168	0.602913	32.2139	25.6672
N-palmitoyl-sphinganine (d18:0/16:0)	52604	39	5.72	2.39e-11	9.56e-11	0.0400344	0.0254558	0.6113	0.890072	22.4798	17.9254
glycosyl-N-palmitoyl-sphingosine	53013	39	5.57	4.6e-11	1.79e-10	0.0263746	0.0173199	0.60361	1.06749	15.2136	12.3285
16-hydroxypalmitate	39609	39	5.56	4.8e-11	1.86e-10	0.154676	0.101791	0.6031	1.04317	37.7013	30.5844
adenosine 5'-monophosphate (AMP)	32342	39	5.53	5.39e-11	2.06e-10	0.402724	0.266574	0.60171	0.928119	68.3754	55.6295
flavin mononucleotide (FMN)	15797	39	5.47	6.99e-11	2.65e-10	0.0248499	0.0166648	0.59858	0.981987	16.053	13.146
ribitol	15772	39	5.43	8.5e-11	3.2e-10	0.106136	0.0718873	0.59619	0.873396	37.301	30.6984
mannitol/sorbitol	46142	39	5.4	9.52e-11	3.55e-10	0.0891193	0.0607076	0.59482	0.893888	33.3966	27.5637
5-oxoproline	1494	39	5.39	9.95e-11	3.68e-10	0.0382479	0.026114	0.59426	0.87763	22.284	18.413
1-(1-enyl-palmitoyl)-2-oleoyl-GPE (P-16:0/18:1)*	52477	39	5.33	1.32e-10	4.84e-10	0.165611	0.114713	0.59078	1.52789	26.635	22.1673
threonine	1284	39	5.31	1.47e-10	5.35e-10	0.0384689	0.0267946	0.58944	0.811303	24.1753	20.1763
N-acetylhistamine	48679	39	5.3	1.54e-10	5.58e-10	3.74874	2.61737	0.58886	6.0151	32.1884	26.8961
1-oleoyl-GPS (18:1)	19260	39	5.29	1.56e-10	5.61e-10	0.0600075	0.0419255	0.5887	0.591927	41.3842	34.5917
campesterol	33997	39	5.29	1.59e-10	5.7e-10	0.0376818	0.0263557	0.58843	1.19875	16.1934	13.5428
mannose-6-phosphate	1469	39	5.27	1.71e-10	6.09e-10	0.114038	0.0800485	0.58756	1.00929	33.4586	28.0323
1,2-dipalmitoyl-GPC (16:0/16:0)	19130	39	5.23	2.08e-10	7.34e-10	0.00461998	0.00327653	0.58507	0.320895	21.1815	17.8379
leucine	60	39	5.23	2.08e-10	7.34e-10	0.011091	0.00786602	0.58506	0.624045	16.876	14.2122
2-palmitoyl-GPC (16:0)*	35253	39	5.23	2.12e-10	7.44e-10	0.0259889	0.0184487	0.58484	0.381822	42.2215	35.5732
cytidine-5'-diphosphoethanolamine	34410	39	5.17	2.72e-10	9.38e-10	0.149994	0.107882	0.58165	0.747798	51.7908	43.9229
glucuronate	15443	39	5.15	3.01e-10	1.03e-09	0.223304	0.161455	0.58037	1.46128	32.3381	27.4975
N-palmitoyl-sphingosine (d18:1/16:0)	44877	39	5.14	3.13e-10	1.07e-09	0.0164512	0.0119201	0.57985	0.784737	16.3446	13.9128
isoleucylglycine	40008	39	5.12	3.4e-10	1.16e-09	0.0255327	0.0185804	0.5788	0.612403	26.0922	22.2582
maltotriose	44688	39	5.11	3.63e-10	1.23e-09	0.40202	0.293577	0.57795	1.06615	59.4709	50.8208
cytidine	514	39	5.09	3.89e-10	1.31e-09	0.0120878	0.00885917	0.57707	0.439239	25.0307	21.4287
1-(1-enyl-stearoyl)-GPE (P-18:0)*	39271	39	5.08	4.09e-10	1.38e-09	0.0355149	0.0261006	0.5764	0.789732	23.863	20.4571
ribulose/xylulose	54671	39	5.08	4.2e-10	1.41e-09	0.0432301	0.0318141	0.57606	1.00008	20.7902	17.8351
beta-sitosterol	27414	39	5.06	4.52e-10	1.51e-09	0.0288307	0.0213011	0.5751	1.12744	15.0603	12.9452
caprate (10:0)	1642	39	5.06	4.56e-10	1.52e-09	0.0538826	0.0398272	0.57499	1.1962	19.4052	16.6834
deoxycarnitine	36747	39	5.05	4.73e-10	1.56e-09	0.1144	0.084723	0.57452	0.970837	34.8391	29.9816
argininosuccinate	15497	39	5.04	5.02e-10	1.65e-09	0.158446	0.117727	0.57372	0.983847	40.4588	34.8746
N-acetyltaurine	48187	39	5.04	5.05e-10	1.65e-09	0.130232	0.0967889	0.57366	1.14068	31.6368	27.2739
3-(4-hydroxyphenyl)lactate	32197	39	5.03	5.23e-10	1.71e-09	1.0823	0.805924	0.57318	1.4831	70.1461	60.5309
dihydroxyacetone phosphate (DHAP)	15522	39	4.98	6.63e-10	2.12e-09	0.177323	0.13373	0.57007	1.18985	35.3906	30.7342
gamma-glutamylleucine	18369	39	4.94	7.83e-10	2.47e-09	0.0797681	0.060705	0.56785	0.562061	50.2495	43.8358
leucylglutamine*	48189	39	4.94	7.87e-10	2.48e-09	0.192188	0.146298	0.56779	0.440582	99.5028	86.8144
N-acetylglucosamine/N-acetylgalactosamine	46539	39	4.93	8.13e-10	2.55e-09	0.0395732	0.0301767	0.56736	0.876623	22.6928	19.8163
1-(1-enyl-stearoyl)-2-linoleoyl-GPE (P-18:0/18:2)*	52748	39	4.93	8.3e-10	2.59e-09	0.0161502	0.0123296	0.56708	1.13035	11.2428	9.8234
ornithine	1493	39	4.92	8.62e-10	2.68e-09	0.0755371	0.0577886	0.56656	1.0722	25.6333	22.4205
galactose 1-phosphate	15706	39	4.85	1.21e-09	3.74e-09	0.0374102	0.0291608	0.56196	1.00218	19.2996	17.0394
1-oleoyl-2-linoleoyl-GPI (18:1/18:2)*	52451	39	4.84	1.24e-09	3.8e-09	0.00617257	0.00481747	0.56165	0.345244	22.7566	20.104
3-hydroxydecanoate	22053	39	4.82	1.37e-09	4.15e-09	0.331941	0.260443	0.56035	1.12941	51.0127	45.186
glutamine	53	39	4.78	1.71e-09	5.15e-09	0.017523	0.0139214	0.55727	0.938986	14.0976	12.5656
N-methylalanine	37069	39	4.73	2.18e-09	6.52e-09	0.196357	0.158137	0.55391	1.04487	42.4094	38.0588
glycylvaline	18357	39	4.72	2.24e-09	6.68e-09	0.0216664	0.0174765	0.55352	0.569822	25.8318	23.2
glutaminylleucine	42994	39	4.71	2.31e-09	6.86e-09	0.0419618	0.0339039	0.55311	0.547222	37.4338	33.6482
valine	1649	39	4.67	2.88e-09	8.48e-09	0.0105521	0.00863404	0.54999	0.646717	15.8838	14.3679
leucylalanine	40010	39	4.63	3.36e-09	9.83e-09	0.245178	0.202384	0.54781	0.45135	109.705	99.6724
biotin	568	39	4.62	3.61e-09	1.05e-08	0.126024	0.104455	0.54679	0.805986	44.0452	40.0994
3-hydroxy-3-methylglutarate	531	39	4.58	4.4e-09	1.26e-08	0.0620561	0.0520214	0.54398	1.07561	23.1599	21.2048
riboflavin (Vitamin B2)	1827	39	4.55	5e-09	1.42e-08	0.350564	0.296052	0.54215	1.33953	44.2007	40.619
glycosyl-N-stearoyl-sphingosine	52234	39	4.51	6.07e-09	1.71e-08	0.0247706	0.0211579	0.53933	1.10705	14.2168	13.1392
glucosamine-6-phosphate	580	39	4.49	6.89e-09	1.93e-08	0.135162	0.116303	0.5375	1.04774	35.0891	32.5491
maltotetraose	15910	39	4.47	7.58e-09	2.12e-08	0.927608	0.802687	0.5361	1.43773	66.9893	62.3156
UDP-N-acetylglucosamine	35162	39	4.44	8.57e-09	2.38e-08	0.0135239	0.0117883	0.53428	0.938041	12.3974	11.5746
3-hydroxysebacate	31943	39	4.44	8.71e-09	2.41e-08	0.621223	0.541998	0.53405	1.22828	64.1694	59.9381
sucrose	1519	39	4.43	9.1e-09	2.5e-08	0.0402715	0.0352272	0.53341	0.917414	21.8743	20.4585
valylleucinamide	37460	39	4.43	9.24e-09	2.53e-08	0.0821573	0.07193	0.53319	0.676796	42.3512	39.6276
3-hydroxyoctanoate	22001	39	4.39	1.13e-08	3.08e-08	0.25741	0.228129	0.53015	1.08189	46.8954	44.1477
1-palmitoyl-2-linoleoyl-GPI (16:0/18:2)	52450	39	4.38	1.18e-08	3.19e-08	0.00375041	0.00333145	0.52958	0.255217	23.9955	22.6155
prolylglycine	40703	39	4.36	1.31e-08	3.52e-08	0.0305176	0.0272777	0.52803	0.638818	27.3462	25.8539
ergosterol	27553	39	4.32	1.57e-08	4.2e-08	0.0124463	0.0112479	0.52529	1.09393	10.1984	9.69499
ribose	1471	39	4.3	1.73e-08	4.62e-08	0.0625122	0.0568473	0.52373	1.03158	24.2371	23.1128
pyridoxate	31555	39	4.29	1.79e-08	4.75e-08	0.0305733	0.0278597	0.52322	0.980641	17.8304	17.0207
inositol 1-phosphate (I1P)	43849	39	4.27	1.99e-08	5.25e-08	0.0673087	0.0617226	0.52165	1.0552	24.5867	23.5443
1-palmitoyl-GPC (16:0)	33955	39	4.25	2.24e-08	5.89e-08	0.00654699	0.00604727	0.51984	0.24736	32.7108	31.4377
gamma-glutamylglutamine	2730	39	4.25	2.27e-08	5.96e-08	1.20575	1.11471	0.51962	1.76857	62.0879	59.698
ribose 5-phosphate	561	39	4.23	2.44e-08	6.37e-08	0.133681	0.124148	0.51849	0.968321	37.7586	36.3874
3-hydroxymyristate	21158	39	4.19	2.92e-08	7.59e-08	0.0400637	0.03762	0.51573	1.17503	17.0344	16.5067
3-methylhistidine	15677	39	4.18	3.21e-08	8.32e-08	0.102132	0.0964844	0.51422	0.994244	32.1432	31.2418
arabitol/xylitol	48885	39	4.16	3.42e-08	8.81e-08	0.0387621	0.0367629	0.51324	0.87108	22.6019	22.0114
alpha-hydroxyisovalerate	46537	39	4.15	3.69e-08	9.48e-08	0.33137	0.315804	0.51203	1.15165	49.9847	48.7965
myristate (14:0)	1365	39	4.14	3.85e-08	9.82e-08	0.081054	0.0774465	0.51138	1.37415	20.7183	20.252
1-kestose	22012	39	4.13	3.98e-08	1.01e-07	0.13227	0.126653	0.51085	0.960301	37.8725	37.0596
propionylglycine	31932	39	4.01	7.61e-08	1.89e-07	0.449241	0.448428	0.50045	1.32136	50.7245	50.6786
alpha-hydroxyisocaproate	22132	39	3.98	8.58e-08	2.12e-07	0.199421	0.20062	0.4985	0.56489	79.0536	79.2908
guanosine 3'-monophosphate (3'-GMP)	39786	39	3.97	8.95e-08	2.2e-07	0.0264713	0.0267034	0.49782	0.742519	21.9119	22.0077
adipate	21134	39	3.97	9.28e-08	2.27e-07	5.47486	5.53608	0.49722	1.51628	154.315	155.175
1-(1-enyl-palmitoyl)-2-oleoyl-GPC (P-16:0/18:1)*	52478	39	3.96	9.6e-08	2.34e-07	0.229116	0.232193	0.49667	1.11945	42.7585	43.0446
N-acetylarginine	33953	39	3.96	9.78e-08	2.38e-07	0.145707	0.14785	0.49635	1.23873	30.815	31.0409
kojibiose	21040	39	3.95	9.9e-08	2.4e-07	0.064077	0.0650684	0.49616	0.829125	30.5303	30.7656
3-hydroxypalmitate	27503	39	3.94	1.04e-07	2.51e-07	0.13086	0.133316	0.49535	1.32253	27.3526	27.608
betaine	3141	39	3.94	1.05e-07	2.53e-07	0.185285	0.188902	0.49517	0.9219	46.6914	47.1448
citrulline	2132	39	3.93	1.14e-07	2.75e-07	0.656828	0.673369	0.49378	1.37321	59.0187	59.7573
1-palmitoyl-3-linoleoyl-glycerol (16:0/18:2)*	52634	39	3.93	1.15e-07	2.75e-07	0.0153016	0.0156915	0.49371	0.44219	27.9744	28.3285
isobutyrylcarnitine	33441	39	3.92	1.16e-07	2.76e-07	0.271414	0.278452	0.4936	1.18341	44.0231	44.5903
spermidine	485	39	3.9	1.29e-07	3.06e-07	0.0168559	0.0174166	0.49182	1.19193	10.8924	11.0721
stachydrine	34384	39	3.87	1.52e-07	3.59e-07	0.201912	0.21099	0.48901	0.999771	44.9449	45.9441
N-acetylputrescine	37496	39	3.85	1.73e-07	4.07e-07	0.161881	0.170669	0.48679	1.61802	24.8665	25.5325
N-acetylglutamate	15720	39	3.8	2.21e-07	5.13e-07	0.393309	0.421543	0.48268	1.3402	46.7948	48.4453
thiamin monophosphate	15798	39	3.77	2.56e-07	5.91e-07	0.022566	0.0244297	0.48017	1.00164	14.9975	15.6045
arginine	1638	39	3.65	4.74e-07	1.07e-06	0.00430852	0.00487153	0.46934	0.925934	7.08898	7.53793
4-hydroxyhippurate	35527	39	3.65	4.75e-07	1.07e-06	7.58717	8.57874	0.46933	1.79286	153.637	163.368
methionine	1302	39	3.65	4.76e-07	1.07e-06	0.00703206	0.00795298	0.46927	0.663256	12.6433	13.4457
hypoxanthine	3127	39	3.61	5.88e-07	1.32e-06	0.0700849	0.0804711	0.46551	1.20379	21.9919	23.5652
glycerate	1572	39	3.57	7.37e-07	1.64e-06	0.0395946	0.0462177	0.46141	0.975643	20.3951	22.035
adenosine-2',3'-cyclic monophosphate	37467	39	3.53	9.07e-07	2e-06	0.0577823	0.0684845	0.45762	0.806184	29.8169	32.461
dihydoxyphenylalanine (L-DOPA)	1576	39	3.46	1.29e-06	2.85e-06	0.335609	0.408501	0.45102	1.89299	30.6033	33.7635
4-hydroxybenzoate	21133	39	3.45	1.42e-06	3.1e-06	0.120105	0.147197	0.44932	1.02746	33.7301	37.341
N-acetylglutamine	33943	39	3.43	1.53e-06	3.33e-06	0.0585488	0.0721599	0.44793	1.01029	23.9504	26.5889
stearoylcarnitine	34409	39	3.4	1.79e-06	3.89e-06	0.0105344	0.0131415	0.44494	0.94449	10.867	12.1374
acetylcarnitine	32198	39	3.4	1.79e-06	3.89e-06	0.04892	0.0610432	0.44488	1.19476	18.5125	20.6795
ethylmalonate	15765	39	3.36	2.34e-06	4.99e-06	0.157841	0.201069	0.43978	1.01673	39.0757	44.1031
phenylalanylglycine	41370	39	3.34	2.52e-06	5.35e-06	0.0566073	0.0725464	0.43829	0.794164	29.9589	33.9155
2-methylcitrate	37483	39	3.33	2.67e-06	5.66e-06	0.108108	0.139179	0.43718	1.01987	32.2392	36.5799
adenosine 3'-monophosphate (3'-AMP)	35142	39	3.33	2.68e-06	5.66e-06	0.0241285	0.0310706	0.43712	0.846596	18.348	20.8209
phenyllactate (PLA)	22130	39	3.33	2.73e-06	5.75e-06	0.610709	0.787573	0.43676	0.984621	79.3685	90.1315
hexanoylglycine	35436	39	3.29	3.25e-06	6.81e-06	0.0751467	0.0982756	0.43332	0.966052	28.3762	32.4506
dodecanedioate	32388	39	3.26	3.91e-06	8.16e-06	0.114702	0.152234	0.4297	0.814493	41.5813	47.9037
phenylalanine	64	39	3.26	3.94e-06	8.2e-06	0.0117809	0.0156477	0.42951	0.615106	17.6457	20.3365
azelate (nonanedioate)	18362	39	3.26	3.95e-06	8.2e-06	0.177336	0.23556	0.42949	1.52182	27.6717	31.8924
stearidonate (18:4n3)	33969	39	3.26	4.01e-06	8.31e-06	0.0773416	0.10286	0.42919	1.12088	24.8111	28.613
allantoin	1107	39	3.22	4.89e-06	1.00629e-05	3.20583	4.33332	0.42522	1.4031	127.609	148.362
mevalonate	39583	39	3.22	5e-06	1.02641e-05	3.47327	4.70336	0.42478	6.08854	30.6095	35.6198
palmitoylcarnitine	44681	39	3.21	5.01e-06	1.02756e-05	0.0465944	0.063114	0.42471	0.974325	22.1546	25.7845
uridine 3'-monophosphate (3'-UMP)	39764	39	3.16	6.64e-06	1.34529e-05	0.0157938	0.0218997	0.41901	0.771076	16.2984	19.1921
1-palmitoleoyl-GPC (16:1)*	33230	39	3.16	6.68e-06	1.35086e-05	0.00173603	0.00240846	0.41888	0.187045	22.2757	26.2376
thiamin (Vitamin B1)	5341	39	3.15	7.11e-06	1.42538e-05	0.025535	0.0356134	0.41759	0.866428	18.4432	21.7808
1-palmitoyl-2-linoleoyl-glycerol (16:0/18:2)*	52633	39	3.14	7.5e-06	1.49657e-05	0.0617883	0.0865647	0.4165	0.963617	25.7958	30.5328
2'-deoxyinosine	15076	39	3.13	7.83e-06	1.55614e-05	0.0324308	0.0456032	0.4156	0.690481	26.0812	30.9276
13-methylmyristate	38293	39	3.11	9.13e-06	1.80627e-05	0.186051	0.265081	0.41241	1.31314	32.8478	39.2084
mevalonolactone	48118	39	3.1	9.33e-06	1.84175e-05	0.501728	0.716184	0.41196	2.50682	28.256	33.759
citraconate/glutaconate	47076	39	3.06	1.14725e-05	2.24495e-05	0.267997	0.389484	0.40761	1.25068	41.3924	49.9
cytidine 2',3'-cyclic monophosphate	37465	39	3.06	1.20513e-05	2.34805e-05	0.0111798	0.0163181	0.40657	0.688095	15.3663	18.5646
thioproline	53231	39	3.04	1.32579e-05	2.57761e-05	0.561849	0.827017	0.40454	2.40731	31.1371	37.7769
1-methylimidazoleacetate	32350	39	3.02	1.44004e-05	2.79373e-05	0.262734	0.389585	0.40277	0.956351	53.5971	65.2655
gamma-glutamylisoleucine*	34456	39	3	1.66869e-05	3.22353e-05	0.129769	0.194983	0.39959	0.619271	58.1707	71.3045
1,2-dilinoleoyl-GPC (18:2/18:2)	52603	39	2.96	2.03258e-05	3.86062e-05	0.00487764	0.00746148	0.3953	0.383978	18.1886	22.496
tricarballylate	15729	39	2.95	2.2167e-05	4.19276e-05	1.01418	1.56384	0.39339	1.44979	69.4629	86.2565
2-methylserine	53229	39	2.92	2.48707e-05	4.67967e-05	2.29008	3.56915	0.39085	1.18345	127.872	159.636
1-stearoyl-2-linoleoyl-GPC (18:0/18:2)*	52452	39	2.92	2.57338e-05	4.82708e-05	0.00455623	0.00712363	0.39009	0.253262	26.6522	33.3259
cytosine	573	39	2.9	2.85085e-05	5.33651e-05	0.669387	1.05669	0.38781	1.01293	80.7713	101.483
1-stearoyl-GPE (18:0)	42398	39	2.89	3.02832e-05	5.62224e-05	0.00247066	0.00392247	0.38646	0.231214	21.4977	27.0873
2-hydroxy-3-methylvalerate	36746	39	2.88	3.11851e-05	5.76607e-05	0.191713	0.305217	0.3858	0.729576	60.0144	75.724
erythritol	20699	39	2.86	3.50914e-05	6.46195e-05	0.067145	0.108109	0.38313	1.1575	22.3865	28.406
3-hydroxyisobutyrate	1549	39	2.84	3.88971e-05	7.13375e-05	0.0621646	0.101088	0.38079	0.793793	31.4098	40.0538
gulonic acid*	46957	39	2.81	4.74543e-05	8.65063e-05	0.0394125	0.0653471	0.37622	0.995003	19.9523	25.6915
sulfate*	46960	39	2.8	4.95736e-05	9.01881e-05	0.238548	0.397229	0.37521	1.07394	45.4787	58.6869
mesaconate (methylfumarate)	18493	39	2.79	5.36227e-05	9.72671e-05	0.358311	0.601326	0.37338	1.19297	50.1766	65.0019
N-delta-acetylornithine	43249	39	2.79	5.36794e-05	9.72671e-05	0.396248	0.665063	0.37336	1.18363	53.1822	68.8992
methyl-4-hydroxybenzoate	34386	39	2.79	5.41665e-05	9.79538e-05	0.0741322	0.124536	0.37315	1.03635	26.2721	34.0517
N-acetylvaline	1591	39	2.73	7.39735e-05	0.000132189	0.018453	0.0319926	0.3658	0.78574	17.2884	22.7639
1-palmitoyl-2-linoleoyl-galactosylglycerol (16:0/18:2)*	54901	39	2.73	7.50525e-05	0.000133854	0.557113	0.967323	0.36546	1.88831	39.5275	52.0851
gamma-glutamylhistidine	18245	39	2.71	8.32514e-05	0.000147894	0.0679673	0.119284	0.36297	1.03546	25.1777	33.3547
3-hydroxypropanoate	1556	39	2.71	8.51769e-05	0.000151018	0.107395	0.188929	0.36242	1.03676	31.6091	41.9246
N6,N6-dimethyladenosine	42081	39	2.7	8.93247e-05	0.000157806	0.0234996	0.0415459	0.36128	0.262639	58.3675	77.6077
3-hydroxysuberate	31936	39	2.69	9.31743e-05	0.000163597	2.41336	4.28558	0.36026	0.921766	168.535	224.587
lysylleucine	40020	39	2.66	0.000111207	0.00019413	0.0289433	0.0523692	0.35595	0.601016	28.3066	38.0761
1-palmitoleoyl-2-linoleoyl-GPC (16:1/18:2)*	52683	39	2.65	0.000114402	0.000199324	0.00249295	0.00452438	0.35526	0.283132	17.6347	23.757
N-acetylserine	37076	39	2.63	0.00012969	0.000224664	0.0107933	0.0198552	0.35216	0.817537	12.7078	17.2357
13-HODE + 9-HODE	37752	39	2.6	0.000152754	0.000263109	0.0475331	0.089023	0.34808	1.23747	17.6182	24.111
uracil	605	39	2.6	0.000155289	0.000266968	0.0149033	0.0279628	0.34767	1.20071	10.1673	13.9268
1-palmitoyl-2-linolenoyl-galactosylglycerol (16:0/18:3)*	54900	39	2.59	0.000164139	0.000281648	0.159901	0.301869	0.34628	0.961333	41.596	57.1525
mannose	48153	39	2.57	0.000178998	0.000306563	0.0162425	0.0309621	0.34409	0.797729	15.9761	22.0577
fructose	48195	39	2.49	0.000282728	0.000475234	0.0583299	0.117206	0.3323	1.05266	22.9433	32.5226
N-acetylcysteine	1586	39	2.48	0.000299543	0.000498871	0.203237	0.411186	0.33078	1.01911	44.2366	62.9216
1,2-dipalmitoleoyl-GPC (16:1/16:1)*	52472	39	2.48	0.000306969	0.000509365	0.00738113	0.0149771	0.33013	0.445498	19.2848	27.4705
dehydroascorbate	1659	39	2.47	0.000313667	0.000519528	0.116565	0.237134	0.32956	0.934732	36.5256	52.0966
1-palmitoyl-2-oleoyl-GPE (16:0/18:1)	19263	39	2.47	0.000325872	0.000537778	0.00208377	0.00425858	0.32855	0.334589	13.6431	19.5039
1,2-dilinoleoyl-galactosylglycerol (18:2/18:2)*	54899	39	2.44	0.000382293	0.000627459	0.0164607	0.0342993	0.32429	0.426766	30.0632	43.3963
oleoylcarnitine	35160	39	2.43	0.000410955	0.00066965	0.0347965	0.0731541	0.32234	0.861172	21.661	31.4072
1-methylhistidine	30460	39	2.43	0.000413282	0.000672233	0.00852396	0.0179328	0.32218	1.07804	8.56415	12.4219
gamma-glutamylalanine	37063	39	2.42	0.000424311	0.000687703	0.132403	0.279461	0.32147	1.2482	29.1517	42.3523
lysine	1301	39	2.42	0.000425887	0.000689024	0.00624605	0.0131896	0.32137	0.654062	12.0832	17.5588
1-palmitoyl-2-linoleoyl-GPE (16:0/18:2)	42449	39	2.42	0.00043383	0.000700623	0.00638387	0.0135116	0.32087	0.450368	17.7408	25.8099
palmitoloelycholine	53257	39	2.39	0.000497236	0.000797338	0.027901	0.0600738	0.31715	0.695635	24.012	35.2339
methionine sulfone	44878	39	2.38	0.000541127	0.000864657	0.288089	0.627008	0.31482	0.702228	76.4338	112.761
cystine	56	39	2.37	0.000557399	0.000885971	0.0734476	0.160463	0.314	1.41949	19.0923	28.22
acetylphosphate	15488	39	2.37	0.00056565	0.000897512	0.0400105	0.0875777	0.31359	1.14223	17.512	25.9087
2'-deoxyguanosine	1411	39	2.36	0.00058384	0.000923139	0.0231724	0.0509291	0.31271	0.785716	19.3741	28.7222
6-phosphogluconate	15442	39	2.35	0.000645169	0.00101656	0.407731	0.907858	0.30992	1.33871	47.6979	71.174
hippurate	15753	39	2.34	0.000668673	0.00104994	0.227259	0.508402	0.30892	0.774162	61.5784	92.1025
pyruvate	22250	39	2.33	0.000695452	0.00108822	1.70566	3.83559	0.30781	1.77393	73.6225	110.403
methylsuccinate	15745	39	2.31	0.000779239	0.00121513	0.0473611	0.108132	0.30459	1.08585	20.042	30.2837
alpha-tocopherol	1561	39	2.31	0.000792816	0.00123418	0.039191	0.0896871	0.30409	1.20022	16.4942	24.9519
succinate	1437	39	2.31	0.000803322	0.00124646	0.00551786	0.0126499	0.30372	1.06	7.00776	10.6105
4-imidazoleacetate	32349	39	2.26	0.00105572	0.00162115	0.0504016	0.119978	0.29582	0.969078	23.1667	35.7431
uridine-2',3'-cyclic monophosphate	37137	39	2.25	0.00110424	0.00168708	0.00824239	0.0197452	0.2945	0.729423	12.4465	19.2642
1-(1-enyl-palmitoyl)-2-linoleoyl-GPE (P-16:0/18:2)*	52677	39	2.22	0.00129342	0.00195633	1.75874	4.30959	0.28982	7.20583	18.4042	28.8094
heme	41754	39	2.21	0.00137033	0.00206575	0.0384062	0.094904	0.2881	0.772938	25.3546	39.8564
erythronate*	42420	39	2.21	0.00137266	0.00206584	0.0259647	0.0641763	0.28805	0.971832	16.5806	26.0673
glycerol 3-phosphate	43847	39	2.2	0.0014796	0.00222308	0.117442	0.293497	0.28579	1.59539	21.4806	33.9575
1-linoleoyl-2-linolenoyl-GPC (18:2/18:3)*	53176	39	2.2	0.00149786	0.00224679	0.0047272	0.0118351	0.28542	0.357538	19.2301	30.4274
1-stearoyl-2-linoleoyl-GPE (18:0/18:2)*	52446	39	2.19	0.00153319	0.00229219	0.00214967	0.0054006	0.28471	0.240524	19.2765	30.5536
N6-acetyllysine	36752	39	2.19	0.00157301	0.002344	0.0224886	0.0567141	0.28394	0.406963	36.849	58.5181
leucylglycine	40045	39	2.19	0.00160279	0.00238445	0.0463829	0.117302	0.28337	0.631007	34.1307	54.2773
homoserine lactone	15696	39	2.13	0.00221076	0.00325153	0.0973073	0.258557	0.27344	1.32212	23.594	38.4598
N-acetylasparagine	33942	39	2.11	0.00250731	0.0036639	0.0995699	0.269935	0.26947	0.980774	32.1733	52.9738
1-palmitoyl-2-oleoyl-GPC (16:0/18:1)	52461	39	2.1	0.00267519	0.00390293	0.00139339	0.00381741	0.2674	0.259703	14.3734	23.7908
4-guanidinobutanoate	15681	39	2.07	0.00312677	0.00453983	0.0519181	0.145956	0.26238	1.03837	21.9435	36.7924
Isobar: fructose 1,6-diphosphate, glucose 1,6-diphosphate, myo-inositol 1,4 or 1,3-diphosphate	46896	39	2.07	0.00314925	0.00456515	0.194006	0.546062	0.26215	0.814403	54.084	90.7364
1-palmitoyl-2-palmitoleoyl-GPC (16:0/16:1)*	52470	39	2.06	0.00322703	0.00465555	0.0143785	0.0406372	0.26135	0.604897	19.8233	33.3258
gamma-aminobutyrate (GABA)	1416	39	2.06	0.00329535	0.00473902	0.0147566	0.0418537	0.26067	1.13497	10.703	18.0253
1-linoleoyl-GPC (18:2)	34419	39	2.05	0.00349656	0.00502041	0.00126235	0.0036167	0.25873	0.175312	20.2665	34.3041
citrate	1564	39	2.04	0.00358125	0.00512903	0.346583	0.997071	0.25794	1.3622	43.2178	73.3031
methylphosphate	37070	39	2.04	0.00358353	0.00512903	0.0260638	0.0749901	0.25792	1.13678	14.2018	24.0893
1,2-dioleoyl-GPE (18:1/18:1)	52609	39	2.01	0.00428937	0.00610074	0.00206219	0.00612303	0.25194	0.296214	15.3306	26.4166
3-ureidopropionate	3155	39	1.98	0.00504215	0.0071378	0.260314	0.79589	0.24646	1.27113	40.1382	70.1836
glycerol 2-phosphate	27728	39	1.97	0.00525208	0.00741181	0.0156663	0.0482611	0.24506	1.02075	12.262	21.5218
ribose 1-phosphate	1763	39	1.97	0.00532932	0.00750912	0.0564154	0.174264	0.24456	1.42822	16.6305	29.2287
phosphothreonine	37453	39	1.97	0.00542207	0.00762794	0.134307	0.416203	0.24397	0.844801	43.3805	76.3657
adenosine	555	39	1.96	0.0057504	0.00805234	0.0196918	0.0617014	0.24193	1.00618	13.9466	24.6873
glycerophosphorylcholine (GPC)	15990	39	1.95	0.00583272	0.00813383	0.00256916	0.00807179	0.24144	1.42303	3.5619	6.31351
carboxyethyl-GABA	40007	39	1.95	0.00583553	0.00813383	0.174195	0.547337	0.24142	1.06593	39.1552	69.4063
1-palmitoyl-2-linoleoyl-GPC (16:0/18:2)	42446	39	1.95	0.00592704	0.00824869	0.00180749	0.00569614	0.24088	0.338907	12.5446	22.2695
glycerophosphoinositol*	47155	39	1.93	0.00677921	0.0093485	0.0327751	0.106004	0.23617	2.2003	8.22791	14.7971
lactate	527	39	1.92	0.00690114	0.00950218	0.0108176	0.0351098	0.23554	0.954313	10.8987	19.6347
4-methyl-2-oxopentanoate	22116	39	1.92	0.00699831	0.00960677	0.0299744	0.0975544	0.23504	0.551855	31.3726	56.5976
1-oleoyl-GPC (18:1)	48258	39	1.92	0.00725097	0.00993855	0.00193757	0.0063505	0.23378	0.21194	20.769	37.6003
choline	15506	39	1.9	0.00787819	0.0107819	0.0149707	0.0498922	0.23081	1.06294	11.511	21.014
arabonate/xylonate	48255	39	1.88	0.00857748	0.0117213	0.0271184	0.0919651	0.22773	0.869727	18.9343	34.8681
guanosine-2',3'-cyclic monophosphate	37139	39	1.88	0.00865991	0.0117983	0.00878936	0.029866	0.22738	0.702947	13.3369	24.5848
quinate	18335	39	1.88	0.0088316	0.0120142	0.0436424	0.148902	0.22666	1.09153	19.139	35.3521
gluconate	587	39	1.87	0.00946054	0.012812	0.081257	0.281274	0.22414	0.952725	29.9201	55.667
N-acetylthreonine	33939	39	1.85	0.0101338	0.0136626	0.0300302	0.105489	0.22159	0.845103	20.5054	38.4321
phytosphingosine	1510	39	1.84	0.0107047	0.0144107	0.0195299	0.0694244	0.21955	0.731901	19.094	36.0001
palmitoylcholine	52944	39	1.84	0.0111125	0.0149376	0.0223782	0.0802052	0.21815	0.689092	21.7088	41.0983
aspartate	443	39	1.83	0.0116004	0.0155704	0.0995	0.36003	0.21653	0.945357	33.3669	63.4707
beta-hydroxyisovalerate	12129	39	1.83	0.0117906	0.0158022	0.0983657	0.357221	0.21591	0.775608	40.4371	77.0596
alpha-ketoglutarate	528	39	1.83	0.0118353	0.0158386	0.0992722	0.360818	0.21577	1.01094	31.1664	59.4178
ergothioneine	37459	39	1.82	0.0120546	0.0160846	0.143471	0.52362	0.21507	1.11978	33.8259	64.6213
1-(1-enyl-palmitoyl)-GPE (P-16:0)*	39270	39	1.81	0.0128891	0.0171476	0.514577	1.90681	0.21251	2.30923	31.0641	59.7981
aconitate [cis or trans]	46173	39	1.8	0.013215	0.0175554	0.0163852	0.0610664	0.21155	0.945327	13.5408	26.1408
alanine	1126	39	1.8	0.0137741	0.0182714	0.0060658	0.0228252	0.20995	0.866326	8.99006	17.4392
1-linoleoyl-GPE (18:2)*	36600	39	1.79	0.014404	0.0190511	0.00140186	0.00533079	0.20822	0.210955	17.7485	34.6103
succinimide	41888	39	1.78	0.0151502	0.0200088	0.0312996	0.12046	0.20624	1.10168	16.0589	31.5041
glycerophosphoethanolamine	37455	39	1.78	0.0154895	0.0204272	0.00226389	0.00875938	0.20537	1.34201	3.54544	6.97396
malonate	15872	39	1.75	0.0175261	0.0230125	0.0144241	0.0575268	0.20047	1.03764	11.5744	23.1147
3-phosphoglycerate	1414	39	1.74	0.0187098	0.0243901	0.126463	0.51275	0.19784	0.988035	35.9923	72.4737
isoleucine	1125	39	1.74	0.0188448	0.0245307	0.00634997	0.0257934	0.19755	0.684532	11.641	23.4618
N-acetylglycine	27710	39	1.73	0.019364	0.0251704	0.0177991	0.0728052	0.19645	0.875731	15.2345	30.8113
1-palmitoyl-GPI (16:0)*	35305	39	1.73	0.020086	0.0260342	0.0170368	0.0703504	0.19496	0.212842	61.3247	124.616
N-acetylphenylalanine	33950	39	1.73	0.0202166	0.0261661	0.0283951	0.117451	0.19469	0.50208	33.5621	68.2582
trigonelline (N'-methylnicotinate)	32401	39	1.7	0.0236551	0.0303993	0.0336427	0.145125	0.18819	1.10942	16.5329	34.338
1,2-dilinoleoyl-GPE (18:2/18:2)*	53174	39	1.69	0.024245	0.0311133	0.00243776	0.0105873	0.18716	0.352552	14.0046	29.1856
pyridoxamine	2150	39	1.68	0.0259144	0.0331148	0.0150246	0.0664781	0.18434	0.910404	13.4638	28.3208
N-acetylleucine	1587	39	1.67	0.0267288	0.0340594	0.0124029	0.0553625	0.18303	0.431358	25.8181	54.547
uridine	606	39	1.66	0.0288642	0.0365237	0.00497317	0.0226979	0.17972	0.810197	8.70414	18.5953
3-methyl-2-oxobutyrate	44526	39	1.65	0.0299633	0.0378616	0.0107643	0.0496741	0.1781	0.581754	17.8342	38.3112
1-linoleoyl-GPS (18:2)*	43676	39	1.64	0.031686	0.039927	0.00321318	0.0150789	0.17566	0.0854158	66.3635	143.763
1-oleoyl-2-linoleoyl-GPC (18:1/18:2)*	52453	39	1.64	0.0317485	0.0399502	0.00153558	0.0072105	0.17557	0.309637	12.6556	27.424
7-methylguanosine	31580	39	1.63	0.0327155	0.0411099	0.0121941	0.0577857	0.17425	0.850764	12.9797	28.2554
phenylalanylalanine	41374	39	1.63	0.032894	0.041277	0.0232645	0.110431	0.17401	0.584278	26.1052	56.8755
N-acetylmethionine	1589	39	1.62	0.0356923	0.0446647	0.0565889	0.275549	0.17038	0.829124	28.691	63.3111
thymine	604	39	1.6	0.0389081	0.0485547	0.0231269	0.115789	0.16648	0.490076	31.031	69.4337
oxaloacetate	47173	39	1.58	0.042869	0.0533507	0.0930606	0.481281	0.16203	0.768079	39.717	90.322
cysteine	1868	39	1.54	0.0511871	0.0632681	0.0669949	0.368954	0.15368	1.61146	16.062	37.6934
17-methylstearate	38296	39	1.52	0.058143	0.0715728	0.13353	0.771805	0.14749	1.41475	25.8292	62.0976
3-hydroxybutyrate (BHBA)	542	39	1.51	0.0599173	0.073557	0.0101916	0.0596091	0.14601	0.921733	10.9526	26.4881
5-methylthioadenosine (MTA)	1419	39	1.5	0.0628823	0.0769884	0.0212075	0.126467	0.14361	0.980123	14.8581	36.2834
1-linoleoylglycerol (18:2)	27447	39	1.47	0.0724455	0.0884577	0.0133525	0.0845199	0.13643	0.628266	18.3924	46.2739
1,2-dioleoyl-GPC (18:1/18:1)*	52457	39	1.46	0.0768781	0.0934921	0.00190739	0.0123965	0.13335	0.268878	16.2429	41.4089
glutamate, gamma-methyl ester	33487	39	1.45	0.0831332	0.100828	0.0224489	0.151269	0.12923	1.02436	14.6267	37.9684
N-acetyl-1-methylhistidine*	43255	39	1.44	0.0833513	0.100958	0.028053	0.189266	0.12909	0.921234	18.1811	47.2243
15-methylpalmitate	38768	39	1.44	0.0860602	0.103684	0.0903586	0.619008	0.12738	1.35596	22.1686	58.0231
1-palmitoyl-GPA (16:0)	34428	39	1.42	0.0946108	0.11358	0.00427399	0.0306891	0.12224	0.186555	35.0437	93.9042
pyridoxal	1651	39	1.42	0.0952494	0.114148	0.00840028	0.0605258	0.12187	1.12891	8.11871	21.7927
saccharopine	1495	39	1.41	0.099143	0.118501	0.02708	0.199225	0.11966	0.571212	28.8089	78.1403
threonylphenylalanine	31530	39	1.39	0.108037	0.128454	0.0089718	0.0691527	0.11484	0.400911	23.6261	65.5929
cytidine 5'-diphosphocholine	34418	39	1.38	0.110532	0.131248	0.0016473	0.0128613	0.11354	0.295733	13.7242	38.348
beta-alanine	55	39	1.35	0.130575	0.15444	0.00565498	0.0488221	0.1038	1.00575	7.47699	21.9695
2,3-dihydroxyisovalerate	38276	39	1.34	0.132076	0.156012	0.161262	1.40257	0.10312	1.36282	29.4663	86.9004
phosphate	42109	39	1.33	0.141415	0.166609	0.000879732	0.00800833	0.09898	0.941559	3.15012	9.50437
N1-methylinosine	48351	39	1.33	0.141926	0.166994	0.0195136	0.178077	0.09876	0.562347	24.8407	75.0411
nonadecanoate (19:0)	1356	39	1.32	0.145003	0.170286	0.0112856	0.104536	0.09744	0.9991	10.6329	32.3612
N2,N2-dimethylguanosine	35137	39	1.32	0.1451	0.170286	0.0161578	0.149737	0.0974	0.87267	14.566	44.3419
guanine	32352	39	1.32	0.147721	0.172914	0.00800098	0.0750917	0.09629	0.798129	11.2072	34.3339
2-palmitoleoylglycerol (16:1)*	52432	39	1.32	0.148247	0.173305	0.0152175	0.143183	0.09607	0.670992	18.3846	56.3934
2-hydroxyglutarate	37253	39	1.31	0.15517	0.181165	0.0184827	0.179801	0.09321	0.937644	14.4992	45.2228
2-linoleoylglycerol (18:2)	32506	39	1.31	0.155896	0.181779	0.00313584	0.0306123	0.09292	0.288181	19.4317	60.7131
N-alpha-acetylornithine	32984	39	1.3	0.164069	0.190328	0.0105518	0.107125	0.08967	0.908039	11.3125	36.0446
2-palmitoleoyl-GPC (16:1)*	35819	39	1.28	0.176743	0.204011	0.000153215	0.00165286	0.08483	0.10192	12.1448	39.8895
O-sulfo-L-tyrosine	45413	39	1.26	0.189662	0.218618	0.000131535	0.00150989	0.08013	0.228032	5.02949	17.0402
1-oleoyl-GPE (18:1)	35628	39	1.25	0.196863	0.22663	0.00134441	0.0159794	0.0776	0.333705	10.9876	37.8807
2-keto-3-deoxy-gluconate	48141	39	1.25	0.197262	0.226801	0.0385708	0.459334	0.07747	0.974263	20.1583	69.5646
threonate	27738	39	1.25	0.199491	0.229073	0.043247	0.520629	0.0767	1.19211	17.4446	60.5267
S-1-pyrroline-5-carboxylate	42370	39	1.24	0.211337	0.241757	0.0167932	0.214231	0.07269	0.63911	20.2764	72.4212
undecanedioate	42395	39	1.23	0.211666	0.241827	0.00744005	0.0950667	0.07258	1.02693	8.39934	30.0242
methyl glucopyranoside (alpha + beta)	46144	39	1.23	0.214723	0.245011	0.0189299	0.245562	0.07157	1.02904	13.3703	48.1555
nicotinate ribonucleoside	33471	39	1.22	0.227091	0.258473	0.0177126	0.244421	0.06757	0.746372	17.8314	66.239
oxalate (ethanedioate)	20694	39	1.21	0.231693	0.262392	0.00806041	0.113853	0.06612	1.06309	8.44521	31.7398
4-hydroxybutyrate (GHB)	34585	39	1.21	0.234503	0.265243	0.00642211	0.0920231	0.06524	0.747186	10.7253	40.5994
benzoate	15778	39	1.21	0.237776	0.26861	0.016285	0.237304	0.06422	0.665863	19.165	73.1589
1-oleoyl-2-linoleoyl-GPE (18:1/18:2)*	52687	39	1.2	0.244139	0.275454	0.000673868	0.010149	0.06226	0.333406	7.786	30.2161
xanthopterin	54728	39	1.19	0.249045	0.279944	1.49586	23.1169	0.06078	3.27721	37.32	146.71
nicotinamide riboside	33013	39	1.17	0.269304	0.301222	0.00407687	0.0703176	0.0548	1.04971	6.08268	25.2618
4-hydroxyphenylpyruvate	1669	39	1.17	0.274374	0.306514	0.00612439	0.108685	0.05334	0.654863	11.9504	50.3424
carnitine	15500	39	1.17	0.275873	0.307747	0.00353162	0.0632084	0.05292	1.0384	5.72297	24.2115
gamma-glutamylglutamate	36738	39	1.15	0.294991	0.327929	0.0126568	0.253461	0.04756	0.750195	14.9965	67.1091
1-linoleoyl-GPI (18:2)*	36594	39	1.15	0.296535	0.329241	0.000936061	0.0189225	0.04714	0.163552	18.7067	84.1074
2-ketogluconate	48370	39	1.14	0.304074	0.337198	0.0923935	1.95722	0.04508	1.03854	29.2682	134.709
1-palmitoyl-GPE (16:0)	35631	39	1.14	0.306765	0.339767	0.00117355	0.0252876	0.04435	0.234093	14.6339	67.9305
3-ketosphinganine	34381	39	1.14	0.307512	0.340178	0.0191658	0.414957	0.04415	0.808818	17.1164	79.6436
glutamate	57	39	1.13	0.314077	0.347017	0.00245976	0.055573	0.04239	0.954908	5.1938	24.6871
2-isopropylmalate	15667	39	1.12	0.329021	0.362643	0.0395829	0.990236	0.03844	1.11407	17.8584	89.3219
cytidine 3'-monophosphate (3'-CMP)	2959	39	1.11	0.338375	0.372048	0.0088659	0.237368	0.03601	0.796411	11.8229	61.175
linolenate [alpha or gamma; (18:3n3 or 6)]	34035	39	1.1	0.34942	0.383726	0.00364208	0.106149	0.03317	1.30107	4.63846	25.0413
1-stearoyl-GPC (18:0)	33961	39	1.09	0.367985	0.402651	0.000473357	0.0161406	0.02849	0.197028	11.0425	64.4809
palmitate (16:0)	1336	39	1.08	0.377308	0.411856	0.00260647	0.0969708	0.02618	1.0798	4.72806	28.8388
arachidate (20:0)	1118	39	1.08	0.381564	0.416001	0.00374172	0.145183	0.02512	1.01004	6.05617	37.7242
nicotinamide	594	39	1.07	0.386481	0.420856	0.0028691	0.117095	0.02392	1.0181	5.26116	33.6107
1-oleoyl-GPI (18:1)*	36602	39	1.04	0.428993	0.46547	0.000404043	0.0291622	0.01367	0.142813	14.0749	119.575
1-linoleoyl-2-linolenoyl-galactosylglycerol (18:2/18:3)*	54898	39	1.02	0.454445	0.490735	0.00068101	0.0882166	0.00766	0.33093	7.88571	89.7509
oleoylcholine	53260	39	1.02	0.459434	0.495514	0.000459657	0.0703445	0.00649	0.480366	4.46318	55.2132
3-methylcytidine	35132	39	1.02	0.459964	0.495514	0.000994436	0.155169	0.00637	0.950087	3.31914	41.4609
1-oleoyl-GPG (18:1)*	45968	39	1.02	0.463671	0.498914	3.47497e-07	6.28159e-05	0.0055	0.0085125	6.92498	93.106
lanthionine	42002	39	1.02	0.465088	0.499846	0.000518637	0.0997899	0.00517	0.334512	6.808	94.4346
stearate (18:0)	1358	39	1	0.483226	0.516886	0.00012737	0.134138	0.00095	1.0851	1.04007	33.7524
2-hydroxybutyrate/2-hydroxyisobutyrate	52281	39	0.99	0.505516	0.53882	-0.000513212	0.122307	0	0.653613	3.46599	53.5063
10-nonadecenoate (19:1n9)	33972	39	0.98	0.517451	0.550894	-0.0020775	0.300081	0	1.14928	3.96594	47.6645
oleate/vaccenate (18:1)	52285	39	0.96	0.550481	0.584	-0.00226699	0.157521	0	1.02001	4.6679	38.9104
5-methyluridine (ribothymidine)	35136	39	0.94	0.569607	0.602879	-1.57265e-05	0.000841913	0	0.361828	1.09601	8.01922
3-methyl-2-oxovalerate	15676	39	0.94	0.573938	0.606754	-0.00316783	0.161229	0	0.542588	10.3732	74.0033
pentadecanoate (15:0)	1361	39	0.94	0.582465	0.61505	-0.00160458	0.0744478	0	1.051	3.81133	25.961
tyrosylglycine	41375	39	0.93	0.583439	0.615361	-0.00192272	0.0883177	0	0.463682	9.45667	64.092
sphinganine	17769	39	0.93	0.591935	0.623597	-0.00607085	0.256508	0	0.828199	9.40784	61.1527
N6-succinyladenosine	48130	39	0.93	0.59599	0.627139	-0.00821271	0.334229	0	0.915223	9.90185	63.1677
palmitoleate (16:1n7)	33447	39	0.91	0.61726	0.648016	-0.00190802	0.0650741	0	1.18657	3.68129	21.4987
eicosenoate (20:1)	33587	39	0.91	0.623953	0.653528	-0.0178229	0.57834	0	1.40668	9.4906	54.0625
guanosine	1573	39	0.89	0.644819	0.674603	-0.00183122	0.0515886	0	0.802039	5.3355	28.3192
dihomo-linoleate (20:2n6)	17805	39	0.88	0.660287	0.689988	-0.00270242	0.0693179	0	0.490844	10.5909	53.6388
1-linoleoyl-GPA (18:2)*	52690	39	0.88	0.661981	0.690961	-0.00442892	0.112497	0	0.396593	16.7805	84.5717
glycine	58	39	0.88	0.670985	0.699554	-0.00277226	0.066941	0	0.874543	6.02054	29.5845
10-heptadecenoate (17:1n7)	33971	39	0.87	0.679635	0.705214	-0.0111651	0.257341	0	1.18901	8.88682	42.6648
1-oleoyl-GPA (18:1)	36812	39	0.87	0.680396	0.705214	-0.000354898	0.00814727	0	0.073145	25.7553	123.402
linoleate (18:2n6)	1105	39	0.87	0.681084	0.705214	-0.00376239	0.0860608	0	1.10835	5.5342	26.4682
margarate (17:0)	1121	39	0.86	0.692516	0.716232	-0.00583726	0.125955	0	1.04768	7.29246	33.8748
2-stearoyl-GPE (18:0)*	41220	39	0.84	0.716303	0.73999	-9.1626e-05	0.00176598	0	0.0378808	25.2691	110.936
nicotinate	1504	39	0.84	0.725104	0.747377	-0.00594268	0.110123	0	0.833579	9.24792	39.8099
erucate (22:1n9)	1552	39	0.83	0.732547	0.75419	-0.0591037	1.06037	0	1.79091	13.5748	57.4984
phosphopantetheine	15504	39	0.81	0.760687	0.781386	-0.0582705	0.930916	0	1.31688	18.3306	73.2671
1-stearoyl-2-oleoyl-GPE (18:0/18:1)	42448	39	0.8	0.779249	0.799183	-0.000545221	0.00810461	0	0.186157	12.5432	48.3601
1-linoleoyl-GPG (18:2)*	54885	39	0.8	0.779777	0.799183	-0.0023503	0.0348668	0	0.15866	30.5559	117.69
galactonate	27719	39	0.77	0.812289	0.829688	-0.0306257	0.402927	0	0.710447	24.6327	89.3474
1-palmitoyl-2-stearoyl-GPC (16:0/18:0)	52616	39	0.72	0.868699	0.885311	-0.0012233	0.0131855	0	0.160627	21.7745	71.4875
1-linolenoyl-GPC (18:3)*	45951	39	0.67	0.911635	0.926982	-0.000182761	0.00168621	0	0.0422117	32.0265	97.2799
1-palmitoyl-GPG (16:0)*	45970	39	0.67	0.915526	0.929018	-0.00369911	0.0336268	0	0.214497	28.3549	85.4913
1-palmitoleoyl-2-linolenoyl-GPC (16:1/18:3)*	53180	39	0.59	0.965829	0.976609	-0.00217572	0.0158048	0	0.139034	33.549	90.4217
inosine	1123	39	0.57	0.973749	0.983519	-0.0101182	0.0700901	0	0.946817	10.6239	27.9616
malate	1303	39	0.51	0.98908	0.997892	-0.151665	0.927079	0	1.08164	36.0046	89.0172
1-stearoyl-2-oleoyl-GPC (18:0/18:1)	52438	39	0.49	0.992534	0.999284	-0.00275675	0.0161424	0	0.126114	41.6327	100.744
docosadienoate (22:2n6)	32415	39	0.43	0.997913	1	-0.0370591	0.193827	0	0.574869	33.4872	76.5841
1-stearoyl-GPI (18:0)	19324	39	0	1	1	0	-1.71665e-16	0	0.2142	0	6.11676e-06
