# Supplementary material for: Systems genetics of the Drosophila metabolome
Source: Genome Res. 2020 Mar;30(3):392–405. doi: 10.1101/gr.243030.118 (PMC7111526; doi:10.1101/gr.243030.118)
Supplement: Supplemental Material [file supp_gr.243030.118_Supplemental_Table_S4.xlsx.xlsx]

## Sheet: A. Females
Supplemental Table S4. Modulated modularity clustering analysis. (A) Females. (B) Males.
Metabolite	Metabolite ID	Module	Entry Index	Average Degree	Degree	Super pathway	Sub pathway
1-oleoyl-2-linoleoyl-glycerol (18:1/18:2)	46798	1	190	0.74271	0.783581	Lipid	Diacylglycerol
1-palmitoyl-3-linoleoyl-glycerol (16:0/18:2)*	52634	1	150	0.74271	0.748485	Lipid	Diacylglycerol
1-oleoyl-3-linoleoyl-glycerol (18:1/18:2)	46799	1	132	0.74271	0.745008	Lipid	Diacylglycerol
1-palmitoyl-2-linoleoyl-glycerol (16:0/18:2)*	52633	1	208	0.74271	0.693765	Lipid	Diacylglycerol
1-methylhistidine	30460	2	252	0.718929	0.493007	Amino Acid	Histidine Metabolism
glucosamine-6-phosphate	580	2	131	0.718929	0.772075	Carbohydrate	Aminosugar Metabolism
mannose-6-phosphate	1469	2	81	0.718929	0.822411	Carbohydrate	Fructose, Mannose and Galactose Metabolism
galactose 1-phosphate	15706	2	286	0.718929	0.544225	Carbohydrate	Fructose, Mannose and Galactose Metabolism
glucose 1-phosphate	15561	2	69	0.718929	0.813759	Carbohydrate	Glycolysis, Gluconeogenesis, and Pyruvate Metabolism
glucose 6-phosphate	31260	2	78	0.718929	0.802104	Carbohydrate	Glycolysis, Gluconeogenesis, and Pyruvate Metabolism
ribose 5-phosphate	561	2	118	0.718929	0.80976	Carbohydrate	Pentose Phosphate Pathway
sedoheptulose-7-phosphate	35649	2	36	0.718929	0.70544	Carbohydrate	Pentose Phosphate Pathway
acetylphosphate	15488	2	154	0.718929	0.707584	Energy	Oxidative Phosphorylation
argininosuccinate	15497	3	120	0.584394	0.360156	Amino Acid	Urea cycle; Arginine and Proline Metabolism
biliverdin	2137	3	307	0.584394	0.418826	Cofactors and Vitamins	Hemoglobin and Porphyrin Metabolism
alpha-tocopherol	1561	3	214	0.584394	0.339753	Cofactors and Vitamins	Tocopherol Metabolism
succinate	1437	3	294	0.584394	0.360702	Energy	TCA Cycle
pseudouridine	33442	3	197	0.584394	0.297711	Nucleotide	Pyrimidine Metabolism, Uracil containing
glutaminylleucine	42994	3	210	0.584394	0.721866	Peptide	Dipeptide
valylleucine	39994	3	205	0.584394	0.721482	Peptide	Dipeptide
valylglutamine	42079	3	206	0.584394	0.720629	Peptide	Dipeptide
alanylleucine	37093	3	204	0.584394	0.719343	Peptide	Dipeptide
isoleucylglycine	40008	3	314	0.584394	0.714184	Peptide	Dipeptide
leucylglycine	40045	3	251	0.584394	0.700094	Peptide	Dipeptide
leucylalanine	40010	3	270	0.584394	0.684916	Peptide	Dipeptide
leucylglutamine*	48189	3	256	0.584394	0.665078	Peptide	Dipeptide
valylglycine	40475	3	280	0.584394	0.656811	Peptide	Dipeptide
phenylalanylalanine	41374	3	356	0.584394	0.642053	Peptide	Dipeptide
phenylalanylglycine	41370	3	278	0.584394	0.621541	Peptide	Dipeptide
threonylphenylalanine	31530	3	326	0.584394	0.589547	Peptide	Dipeptide
asparagine	512	4	82	0.54936	0.581857	Amino Acid	Alanine and Aspartate Metabolism
N-acetylalanine	1585	4	17	0.54936	0.542931	Amino Acid	Alanine and Aspartate Metabolism
alanine	1126	4	178	0.54936	0.406163	Amino Acid	Alanine and Aspartate Metabolism
glutamate	57	4	200	0.54936	0.473138	Amino Acid	Glutamate Metabolism
glutamine	53	4	103	0.54936	0.392608	Amino Acid	Glutamate Metabolism
threonine	1284	4	127	0.54936	0.624881	Amino Acid	Glycine, Serine and Threonine Metabolism
serine	1648	4	77	0.54936	0.613961	Amino Acid	Glycine, Serine and Threonine Metabolism
N-acetylserine	37076	4	133	0.54936	0.593977	Amino Acid	Glycine, Serine and Threonine Metabolism
N-acetylthreonine	33939	4	288	0.54936	0.487604	Amino Acid	Glycine, Serine and Threonine Metabolism
valine	1649	4	55	0.54936	0.716899	Amino Acid	Leucine, Isoleucine and Valine Metabolism
leucine	60	4	63	0.54936	0.715596	Amino Acid	Leucine, Isoleucine and Valine Metabolism
isoleucine	1125	4	145	0.54936	0.690948	Amino Acid	Leucine, Isoleucine and Valine Metabolism
N-acetylvaline	1591	4	322	0.54936	0.619011	Amino Acid	Leucine, Isoleucine and Valine Metabolism
N-acetylleucine	1587	4	165	0.54936	0.570283	Amino Acid	Leucine, Isoleucine and Valine Metabolism
3-methyl-2-oxobutyrate	44526	4	161	0.54936	0.484818	Amino Acid	Leucine, Isoleucine and Valine Metabolism
lysine	1301	4	114	0.54936	0.670828	Amino Acid	Lysine Metabolism
N6,N6,N6-trimethyllysine	1498	4	3	0.54936	0.405405	Amino Acid	Lysine Metabolism
methionine	1302	4	50	0.54936	0.682355	Amino Acid	Methionine, Cysteine, SAM and Taurine Metabolism
phenylalanine	64	4	92	0.54936	0.704166	Amino Acid	Phenylalanine and Tyrosine Metabolism
N-acetylphenylalanine	33950	4	289	0.54936	0.576291	Amino Acid	Phenylalanine and Tyrosine Metabolism
dihydoxyphenylalanine (L-DOPA)	1576	4	237	0.54936	0.523481	Amino Acid	Phenylalanine and Tyrosine Metabolism
tryptophan	54	4	121	0.54936	0.531182	Amino Acid	Tryptophan Metabolism
arginine	1638	4	139	0.54936	0.617201	Amino Acid	Urea cycle; Arginine and Proline Metabolism
proline	1898	4	91	0.54936	0.360671	Amino Acid	Urea cycle; Arginine and Proline Metabolism
N6-carboxymethyllysine	36713	4	90	0.54936	0.285665	Carbohydrate	Advanced Glycation End-product
nicotinate	1504	4	169	0.54936	0.493178	Cofactors and Vitamins	Nicotinate and Nicotinamide Metabolism
methylphosphate	37070	4	348	0.54936	0.371158	Nucleotide	Purine and Pyrimidine Metabolism
uracil	605	4	159	0.54936	0.447896	Nucleotide	Pyrimidine Metabolism, Uracil containing
glycylvaline	18357	4	87	0.54936	0.68533	Peptide	Dipeptide
glycylleucine	34398	4	76	0.54936	0.641651	Peptide	Dipeptide
glycylisoleucine	36659	4	155	0.54936	0.624382	Peptide	Dipeptide
lysylleucine	40020	4	248	0.54936	0.552932	Peptide	Dipeptide
prolylglycine	40703	4	48	0.54936	0.543525	Peptide	Dipeptide
O-sulfo-L-tyrosine	45413	4	149	0.54936	0.44628	Xenobiotics	Chemical
alpha-tocotrienol	37502	5	47	0.543226	0.390393	Cofactors and Vitamins	Tocopherol Metabolism
gamma-tocopherol/beta-tocopherol	52473	5	39	0.543226	0.352026	Cofactors and Vitamins	Tocopherol Metabolism
palmitate (16:0)	1336	5	279	0.543226	0.706117	Lipid	Long Chain Fatty Acid
eicosenoate (20:1)	33587	5	267	0.543226	0.686199	Lipid	Long Chain Fatty Acid
oleate/vaccenate (18:1)	52285	5	317	0.543226	0.682666	Lipid	Long Chain Fatty Acid
stearate (18:0)	1358	5	330	0.543226	0.676647	Lipid	Long Chain Fatty Acid
arachidate (20:0)	1118	5	225	0.543226	0.650631	Lipid	Long Chain Fatty Acid
margarate (17:0)	1121	5	327	0.543226	0.646107	Lipid	Long Chain Fatty Acid
palmitoleate (16:1n7)	33447	5	344	0.543226	0.621839	Lipid	Long Chain Fatty Acid
10-heptadecenoate (17:1n7)	33971	5	290	0.543226	0.593733	Lipid	Long Chain Fatty Acid
pentadecanoate (15:0)	1361	5	306	0.543226	0.59012	Lipid	Long Chain Fatty Acid
10-nonadecenoate (19:1n9)	33972	5	263	0.543226	0.554011	Lipid	Long Chain Fatty Acid
myristate (14:0)	1365	5	342	0.543226	0.463094	Lipid	Long Chain Fatty Acid
1-linoleoyl-GPI (18:2)*	36594	5	221	0.543226	0.573584	Lipid	Lysolipid
1-linoleoyl-GPS (18:2)*	43676	5	234	0.543226	0.39245	Lipid	Lysolipid
mevalonate	39583	5	353	0.543226	0.171743	Lipid	Mevalonate Metabolism
linoleate (18:2n6)	1105	5	313	0.543226	0.67532	Lipid	Polyunsaturated Fatty Acid (n3 and n6)
dihomo-linoleate (20:2n6)	17805	5	164	0.543226	0.617454	Lipid	Polyunsaturated Fatty Acid (n3 and n6)
docosadienoate (22:2n6)	32415	5	351	0.543226	0.556279	Lipid	Polyunsaturated Fatty Acid (n3 and n6)
linolenate [alpha or gamma; (18:3n3 or 6)]	34035	5	338	0.543226	0.487542	Lipid	Polyunsaturated Fatty Acid (n3 and n6)
5-methyluridine (ribothymidine)	35136	5	232	0.543226	0.319787	Nucleotide	Pyrimidine Metabolism, Uracil containing
deoxycarnitine	36747	6	99	0.540806	0.393932	Lipid	Carnitine Metabolism
carnitine	15500	6	364	0.540806	0.378265	Lipid	Carnitine Metabolism
1-palmitoleoyl-GPC (16:1)*	33230	6	285	0.540806	0.66979	Lipid	Lysolipid
1-oleoyl-GPC (18:1)	48258	6	295	0.540806	0.658913	Lipid	Lysolipid
1-linoleoyl-GPC (18:2)	34419	6	334	0.540806	0.642829	Lipid	Lysolipid
2-palmitoleoyl-GPC (16:1)*	35819	6	299	0.540806	0.607568	Lipid	Lysolipid
1-oleoyl-GPE (18:1)	35628	6	250	0.540806	0.573248	Lipid	Lysolipid
1-oleoyl-GPG (18:1)*	45968	6	219	0.540806	0.545727	Lipid	Lysolipid
1-linoleoyl-GPE (18:2)*	36600	6	218	0.540806	0.529163	Lipid	Lysolipid
7-methylguanosine	31580	6	319	0.540806	0.408621	Nucleotide	Purine Metabolism, Guanine containing
sarcosine	1516	7	21	0.538873	0.201905	Amino Acid	Glycine, Serine and Threonine Metabolism
glycerate	1572	7	45	0.538873	0.278643	Carbohydrate	Glycolysis, Gluconeogenesis, and Pyruvate Metabolism
flavin mononucleotide (FMN)	15797	7	126	0.538873	0.32003	Cofactors and Vitamins	Riboflavin Metabolism
riboflavin (Vitamin B2)	1827	7	166	0.538873	0.301213	Cofactors and Vitamins	Riboflavin Metabolism
fumarate	1643	7	191	0.538873	0.298215	Energy	TCA Cycle
2-palmitoyl-GPC (16:0)*	35253	7	312	0.538873	0.526683	Lipid	Lysolipid
1-oleoyl-GPS (18:1)	19260	7	148	0.538873	0.522489	Lipid	Lysolipid
1-palmitoyl-2-linoleoyl-GPC (16:0/18:2)	42446	7	182	0.538873	0.712776	Lipid	Phospholipid Metabolism
1-palmitoleoyl-2-linoleoyl-GPC (16:1/18:2)*	52683	7	122	0.538873	0.704891	Lipid	Phospholipid Metabolism
1-oleoyl-2-linoleoyl-GPC (18:1/18:2)*	52453	7	268	0.538873	0.691008	Lipid	Phospholipid Metabolism
1,2-dipalmitoleoyl-GPC (16:1/16:1)*	52472	7	42	0.538873	0.66113	Lipid	Phospholipid Metabolism
1-palmitoyl-2-oleoyl-GPE (16:0/18:1)	19263	7	98	0.538873	0.658718	Lipid	Phospholipid Metabolism
1-palmitoyl-2-palmitoleoyl-GPC (16:0/16:1)*	52470	7	71	0.538873	0.652498	Lipid	Phospholipid Metabolism
1,2-dilinoleoyl-GPC (18:2/18:2)	52603	7	41	0.538873	0.652245	Lipid	Phospholipid Metabolism
1-palmitoyl-2-linoleoyl-GPI (16:0/18:2)	52450	7	61	0.538873	0.650964	Lipid	Phospholipid Metabolism
1-palmitoyl-2-oleoyl-GPC (16:0/18:1)	52461	7	213	0.538873	0.650906	Lipid	Phospholipid Metabolism
1-oleoyl-2-linoleoyl-GPE (18:1/18:2)*	52687	7	110	0.538873	0.648456	Lipid	Phospholipid Metabolism
1-oleoyl-2-linoleoyl-GPI (18:1/18:2)*	52451	7	142	0.538873	0.641919	Lipid	Phospholipid Metabolism
1-stearoyl-2-linoleoyl-GPE (18:0/18:2)*	52446	7	174	0.538873	0.636609	Lipid	Phospholipid Metabolism
1,2-dilinoleoyl-GPE (18:2/18:2)*	53174	7	34	0.538873	0.632731	Lipid	Phospholipid Metabolism
1-linoleoyl-2-linolenoyl-GPC (18:2/18:3)*	53176	7	179	0.538873	0.616352	Lipid	Phospholipid Metabolism
1-stearoyl-2-linoleoyl-GPC (18:0/18:2)*	52452	7	68	0.538873	0.595789	Lipid	Phospholipid Metabolism
1,2-dioleoyl-GPE (18:1/18:1)	52609	7	38	0.538873	0.560804	Lipid	Phospholipid Metabolism
1,2-dipalmitoyl-GPC (16:0/16:0)	19130	7	60	0.538873	0.560543	Lipid	Phospholipid Metabolism
1-palmitoyl-2-linoleoyl-GPE (16:0/18:2)	42449	7	262	0.538873	0.548611	Lipid	Phospholipid Metabolism
1,2-dioleoyl-GPC (18:1/18:1)*	52457	7	95	0.538873	0.530203	Lipid	Phospholipid Metabolism
beta-alanine	55	7	331	0.538873	0.311222	Nucleotide	Pyrimidine Metabolism, Uracil containing
valylleucinamide	37460	7	83	0.538873	0.320895	Xenobiotics	Chemical
N-acetylglucosamine/N-acetylgalactosamine	46539	8	130	0.531317	0.476248	Carbohydrate	Aminosugar Metabolism
N-acetylglucosamine 6-phosphate	15107	8	101	0.531317	0.319517	Carbohydrate	Aminosugar Metabolism
adenosine 3'-monophosphate (3'-AMP)	35142	8	244	0.531317	0.614915	Nucleotide	Purine Metabolism, Adenine containing
guanosine 3'-monophosphate (3'-GMP)	39786	8	153	0.531317	0.668194	Nucleotide	Purine Metabolism, Guanine containing
uridine 3'-monophosphate (3'-UMP)	39764	8	170	0.531317	0.57771	Nucleotide	Pyrimidine Metabolism, Uracil containing
spermidine	485	9	236	0.48191	0.317604	Amino Acid	Polyamine Metabolism
beta-sitosterol	27414	9	301	0.48191	0.27948	Lipid	Sterol
adenosine-2',3'-cyclic monophosphate	37467	9	211	0.48191	0.458409	Nucleotide	Purine Metabolism, Adenine containing
guanosine-2',3'-cyclic monophosphate	37139	9	325	0.48191	0.610008	Nucleotide	Purine Metabolism, Guanine containing
cytidine 2',3'-cyclic monophosphate	37465	9	284	0.48191	0.59184	Nucleotide	Pyrimidine Metabolism, Cytidine containing
uridine-2',3'-cyclic monophosphate	37137	9	337	0.48191	0.634117	Nucleotide	Pyrimidine Metabolism, Uracil containing
ethylmalonate	15765	10	151	0.474446	0.528408	Amino Acid	Leucine, Isoleucine and Valine Metabolism
beta-hydroxyisovalerate	12129	10	339	0.474446	0.332202	Amino Acid	Leucine, Isoleucine and Valine Metabolism
15-methylpalmitate	38768	10	226	0.474446	0.606997	Lipid	Fatty Acid, Branched
17-methylstearate	38296	10	216	0.474446	0.597283	Lipid	Fatty Acid, Branched
13-methylmyristate	38293	10	88	0.474446	0.551968	Lipid	Fatty Acid, Branched
2'-O-methylguanosine	36811	10	125	0.474446	0.22982	Nucleotide	Purine Metabolism, Guanine containing
2'-deoxyinosine	15076	11	297	0.41796	0.454108	Nucleotide	Purine Metabolism, (Hypo)Xanthine/Inosine containing
2'-deoxyguanosine	1411	11	308	0.41796	0.410918	Nucleotide	Purine Metabolism, Guanine containing
cytidine	514	11	209	0.41796	0.310266	Nucleotide	Pyrimidine Metabolism, Cytidine containing
thymidine	2183	11	316	0.41796	0.57413	Nucleotide	Pyrimidine Metabolism, Thymine containing
2'-deoxyuridine	1412	11	362	0.41796	0.340379	Nucleotide	Pyrimidine Metabolism, Uracil containing
4-guanidinobutanoate	15681	12	172	0.412953	0.390359	Amino Acid	Guanidino and Acetamido Metabolism
methionine sulfone	44878	12	181	0.412953	0.538361	Amino Acid	Methionine, Cysteine, SAM and Taurine Metabolism
N-acetylmethionine sulfoxide	45428	12	108	0.412953	0.438625	Amino Acid	Methionine, Cysteine, SAM and Taurine Metabolism
cystathionine	15705	12	44	0.412953	0.332838	Amino Acid	Methionine, Cysteine, SAM and Taurine Metabolism
mannitol/sorbitol	46142	12	212	0.412953	0.369699	Carbohydrate	Fructose, Mannose and Galactose Metabolism
pyruvate	22250	12	303	0.412953	0.596145	Carbohydrate	Glycolysis, Gluconeogenesis, and Pyruvate Metabolism
arabitol/xylitol	48885	12	109	0.412953	0.249631	Carbohydrate	Pentose Metabolism
threonate	27738	12	183	0.412953	0.443102	Cofactors and Vitamins	Ascorbate and Aldarate Metabolism
oxalate (ethanedioate)	20694	12	349	0.412953	0.421011	Cofactors and Vitamins	Ascorbate and Aldarate Metabolism
pantothenate	1508	12	32	0.412953	0.225085	Cofactors and Vitamins	Pantothenate and CoA Metabolism
pyridoxamine	2150	12	217	0.412953	0.476717	Cofactors and Vitamins	Vitamin B6 Metabolism
pyridoxate	31555	12	188	0.412953	0.236053	Cofactors and Vitamins	Vitamin B6 Metabolism
alpha-ketoglutarate	528	12	247	0.412953	0.589868	Energy	TCA Cycle
citraconate/glutaconate	47076	12	198	0.412953	0.548245	Energy	TCA Cycle
mesaconate (methylfumarate)	18493	12	202	0.412953	0.545753	Energy	TCA Cycle
campesterol	33997	12	193	0.412953	0.275165	Lipid	Sterol
3-ureidopropionate	3155	12	271	0.412953	0.343544	Nucleotide	Pyrimidine Metabolism, Uracil containing
palmitoylcarnitine	44681	13	223	0.390621	0.568904	Lipid	Fatty Acid Metabolism(Acyl Carnitine)
oleoylcarnitine	35160	13	245	0.390621	0.529949	Lipid	Fatty Acid Metabolism(Acyl Carnitine)
stearoylcarnitine	34409	13	324	0.390621	0.40285	Lipid	Fatty Acid Metabolism(Acyl Carnitine)
glycerol 3-phosphate	43847	13	184	0.390621	0.223056	Lipid	Glycerolipid Metabolism
7-methylguanine	35114	13	6	0.390621	0.228346	Nucleotide	Purine Metabolism, Guanine containing
N-acetylaspartate (NAA)	22185	14	105	0.34664	0.305174	Amino Acid	Alanine and Aspartate Metabolism
isobutyrylcarnitine	33441	14	22	0.34664	0.44714	Amino Acid	Leucine, Isoleucine and Valine Metabolism
N-acetyltaurine	48187	14	175	0.34664	0.262503	Amino Acid	Methionine, Cysteine, SAM and Taurine Metabolism
glucuronate	15443	14	243	0.34664	0.435511	Carbohydrate	Aminosugar Metabolism
lactate	527	14	84	0.34664	0.394575	Carbohydrate	Glycolysis, Gluconeogenesis, and Pyruvate Metabolism
dihydroxyacetone phosphate (DHAP)	15522	14	246	0.34664	0.279449	Carbohydrate	Glycolysis, Gluconeogenesis, and Pyruvate Metabolism
5-aminolevulinate	2290	14	53	0.34664	0.232545	Cofactors and Vitamins	Hemoglobin and Porphyrin Metabolism
propionylcarnitine	32452	14	56	0.34664	0.538302	Lipid	Fatty Acid Metabolism (also BCAA Metabolism)
linoleoylcarnitine*	46223	14	80	0.34664	0.539298	Lipid	Fatty Acid Metabolism(Acyl Carnitine)
palmitoleoylcarnitine*	53223	14	152	0.34664	0.526087	Lipid	Fatty Acid Metabolism(Acyl Carnitine)
myristoylcarnitine	33952	14	30	0.34664	0.516271	Lipid	Fatty Acid Metabolism(Acyl Carnitine)
3-hydroxybutyrylcarnitine (2)	52984	14	31	0.34664	0.249212	Lipid	Fatty Acid Metabolism(Acyl Carnitine)
acetylcarnitine	32198	14	187	0.34664	0.174759	Lipid	Fatty Acid Metabolism(Acyl Carnitine)
2-hydroxyglutarate	37253	14	291	0.34664	0.331176	Lipid	Fatty Acid, Dicarboxylate
4-hydroxybutyrate (GHB)	34585	14	277	0.34664	0.314907	Lipid	Fatty Acid, Monohydroxy
choline phosphate	34396	14	14	0.34664	0.198767	Lipid	Phospholipid Metabolism
1-(1-enyl-stearoyl)-2-linoleoyl-GPE (P-18:0/18:2)*	52748	14	65	0.34664	0.350533	Lipid	Plasmalogen
ergosterol	27553	14	276	0.34664	0.276394	Lipid	Sterol
N2,N2-dimethylguanine	37081	14	240	0.34664	0.213562	Nucleotide	Purine Metabolism, Guanine containing
3-methylhistidine	15677	15	231	0.334441	0.263968	Amino Acid	Histidine Metabolism
2-phosphoglycerate	35629	15	328	0.334441	0.507262	Carbohydrate	Glycolysis, Gluconeogenesis, and Pyruvate Metabolism
phosphoenolpyruvate (PEP)	597	15	264	0.334441	0.469033	Carbohydrate	Glycolysis, Gluconeogenesis, and Pyruvate Metabolism
Isobar: fructose 1,6-diphosphate, glucose 1,6-diphosphate, myo-inositol 1,4 or 1,3-diphosphate	46896	15	235	0.334441	0.222065	Carbohydrate	Glycolysis, Gluconeogenesis, and Pyruvate Metabolism
ribose 1-phosphate	1763	15	255	0.334441	0.313662	Carbohydrate	Pentose Phosphate Pathway
thymine	604	15	124	0.334441	0.230657	Nucleotide	Pyrimidine Metabolism, Thymine containing
cysteine	1868	16	222	0.325921	0.327126	Amino Acid	Methionine, Cysteine, SAM and Taurine Metabolism
methionine sulfoxide	18374	16	26	0.325921	0.251621	Amino Acid	Methionine, Cysteine, SAM and Taurine Metabolism
trans-4-hydroxyproline	32306	16	4	0.325921	0.281458	Amino Acid	Urea cycle; Arginine and Proline Metabolism
N-acetyl-glucosamine 1-phosphate	15741	16	28	0.325921	0.331883	Carbohydrate	Aminosugar Metabolism
nicotinamide ribonucleotide (NMN)	22152	16	2	0.325921	0.410036	Cofactors and Vitamins	Nicotinate and Nicotinamide Metabolism
phosphopantetheine	15504	16	347	0.325921	0.358489	Cofactors and Vitamins	Pantothenate and CoA Metabolism
pyridoxal	1651	16	186	0.325921	0.25252	Cofactors and Vitamins	Vitamin B6 Metabolism
glycerol	15122	16	185	0.325921	0.218282	Lipid	Glycerolipid Metabolism
myristoleate (14:1n5)	32418	16	143	0.325921	0.343374	Lipid	Long Chain Fatty Acid
5-dodecenoate (12:1n7)	33968	16	272	0.325921	0.393804	Lipid	Medium Chain Fatty Acid
caprate (10:0)	1642	16	260	0.325921	0.306121	Lipid	Medium Chain Fatty Acid
laurate (12:0)	1645	16	52	0.325921	0.272148	Lipid	Medium Chain Fatty Acid
cytidine-5'-diphosphoethanolamine	34410	16	156	0.325921	0.372857	Lipid	Phospholipid Metabolism
cytidine 5'-diphosphocholine	34418	16	332	0.325921	0.302029	Lipid	Phospholipid Metabolism
1-(1-enyl-palmitoyl)-2-linoleoyl-GPE (P-16:0/18:2)*	52677	16	359	0.325921	0.221178	Lipid	Plasmalogen
adenosine 5'-monophosphate (AMP)	32342	16	33	0.325921	0.477094	Nucleotide	Purine Metabolism, Adenine containing
N6,N6-dimethyladenosine	42081	16	157	0.325921	0.235678	Nucleotide	Purine Metabolism, Adenine containing
cytidine 5'-monophosphate (5'-CMP)	2372	16	11	0.325921	0.441515	Nucleotide	Pyrimidine Metabolism, Cytidine containing
3-methylcytidine	35132	16	283	0.325921	0.274869	Nucleotide	Pyrimidine Metabolism, Cytidine containing
ergothioneine	37459	16	275	0.325921	0.446347	Xenobiotics	Food Component/Plant
glutamate, gamma-methyl ester	33487	17	323	0.305162	0.193534	Amino Acid	Glutamate Metabolism
putrescine	1408	17	137	0.305162	0.289081	Amino Acid	Polyamine Metabolism
3-hydroxyoctanoate	22001	17	287	0.305162	0.479432	Lipid	Fatty Acid, Monohydroxy
3-hydroxydecanoate	22053	17	273	0.305162	0.472131	Lipid	Fatty Acid, Monohydroxy
3-hydroxylaurate	32457	17	104	0.305162	0.464568	Lipid	Fatty Acid, Monohydroxy
3-hydroxymyristate	21158	17	167	0.305162	0.253721	Lipid	Fatty Acid, Monohydroxy
phosphoethanolamine	1600	17	10	0.305162	0.314121	Lipid	Phospholipid Metabolism
phytosphingosine	1510	17	199	0.305162	0.29109	Lipid	Sphingolipid Metabolism
adenine	554	17	123	0.305162	0.165971	Nucleotide	Purine Metabolism, Adenine containing
3-aminoisobutyrate	1566	17	18	0.305162	0.127972	Nucleotide	Pyrimidine Metabolism, Thymine containing
N-methylalanine	37069	18	365	0.300376	0.257464	Amino Acid	Alanine and Aspartate Metabolism
1-methylhistamine	43831	18	27	0.300376	0.170023	Amino Acid	Histidine Metabolism
kynurenine	15140	18	85	0.300376	0.21301	Amino Acid	Tryptophan Metabolism
hexanoylglycine	35436	18	266	0.300376	0.223659	Lipid	Fatty Acid Metabolism(Acyl Glycine)
undecanedioate	42395	18	318	0.300376	0.178538	Lipid	Fatty Acid, Dicarboxylate
13-HODE + 9-HODE	37752	18	343	0.300376	0.121726	Lipid	Fatty Acid, Monohydroxy
myo-inositol	1124	18	253	0.300376	0.195853	Lipid	Inositol Metabolism
1-stearoyl-GPE (18:0)	42398	18	94	0.300376	0.475314	Lipid	Lysolipid
2-stearoyl-GPE (18:0)*	41220	18	238	0.300376	0.463692	Lipid	Lysolipid
1-palmitoyl-GPE (16:0)	35631	18	163	0.300376	0.449906	Lipid	Lysolipid
1-palmitoyl-GPG (16:0)*	45970	18	315	0.300376	0.415242	Lipid	Lysolipid
1-palmitoyl-GPC (16:0)	33955	18	292	0.300376	0.341017	Lipid	Lysolipid
1-stearoyl-GPI (18:0)	19324	18	129	0.300376	0.305127	Lipid	Lysolipid
1-(1-enyl-stearoyl)-GPE (P-18:0)*	39271	18	49	0.300376	0.439764	Lipid	Lysoplasmalogen
1-(1-enyl-palmitoyl)-GPE (P-16:0)*	39270	18	230	0.300376	0.406998	Lipid	Lysoplasmalogen
1-(1-enyl-stearoyl)-2-oleoyl-GPE (P-18:0/18:1)	52614	18	66	0.300376	0.217313	Lipid	Plasmalogen
2'-deoxycytidine	15949	18	233	0.300376	0.231753	Nucleotide	Pyrimidine Metabolism, Cytidine containing
N-acetylasparagine	33942	19	333	0.299272	0.371601	Amino Acid	Alanine and Aspartate Metabolism
aspartate	443	19	241	0.299272	0.362067	Amino Acid	Alanine and Aspartate Metabolism
N-acetylglutamine	33943	19	215	0.299272	0.380425	Amino Acid	Glutamate Metabolism
S-1-pyrroline-5-carboxylate	42370	19	304	0.299272	0.35294	Amino Acid	Glutamate Metabolism
gamma-aminobutyrate (GABA)	1416	19	320	0.299272	0.137713	Amino Acid	Glutamate Metabolism
betaine	3141	19	282	0.299272	0.388405	Amino Acid	Glycine, Serine and Threonine Metabolism
2-methylserine	53229	19	140	0.299272	0.329058	Amino Acid	Glycine, Serine and Threonine Metabolism
phosphothreonine	37453	19	195	0.299272	0.168116	Amino Acid	Glycine, Serine and Threonine Metabolism
N-acetylhistidine	33946	19	228	0.299272	0.244191	Amino Acid	Histidine Metabolism
N-acetylhistamine	48679	19	192	0.299272	0.241115	Amino Acid	Histidine Metabolism
histamine	1574	19	43	0.299272	0.17648	Amino Acid	Histidine Metabolism
alpha-hydroxyisovalerate	46537	19	311	0.299272	0.461147	Amino Acid	Leucine, Isoleucine and Valine Metabolism
2-hydroxy-3-methylvalerate	36746	19	360	0.299272	0.452891	Amino Acid	Leucine, Isoleucine and Valine Metabolism
alpha-hydroxyisocaproate	22132	19	296	0.299272	0.405676	Amino Acid	Leucine, Isoleucine and Valine Metabolism
3-hydroxyisobutyrate	1549	19	177	0.299272	0.323768	Amino Acid	Leucine, Isoleucine and Valine Metabolism
glutarate (pentanedioate)	396	19	97	0.299272	0.268215	Amino Acid	Lysine Metabolism
S-adenosylhomocysteine (SAH)	42382	19	196	0.299272	0.358828	Amino Acid	Methionine, Cysteine, SAM and Taurine Metabolism
cystine	56	19	67	0.299272	0.232933	Amino Acid	Methionine, Cysteine, SAM and Taurine Metabolism
phenyllactate (PLA)	22130	19	341	0.299272	0.448856	Amino Acid	Phenylalanine and Tyrosine Metabolism
N-acetylputrescine	37496	19	350	0.299272	0.270551	Amino Acid	Polyamine Metabolism
thioproline	53231	19	171	0.299272	0.29533	Amino Acid	Tryptophan Metabolism
citrulline	2132	19	310	0.299272	0.258836	Amino Acid	Urea cycle; Arginine and Proline Metabolism
ornithine	1493	19	20	0.299272	0.245649	Amino Acid	Urea cycle; Arginine and Proline Metabolism
N-delta-acetylornithine	43249	19	168	0.299272	0.201324	Amino Acid	Urea cycle; Arginine and Proline Metabolism
erythronate*	42420	19	224	0.299272	0.400097	Carbohydrate	Aminosugar Metabolism
sucrose	1519	19	265	0.299272	0.239938	Carbohydrate	Disaccharides and Oligosaccharides
fructose	48195	19	354	0.299272	0.230356	Carbohydrate	Fructose, Mannose and Galactose Metabolism
UDP-N-acetylglucosamine	35162	19	111	0.299272	0.206329	Carbohydrate	Nucleotide Sugar
ribitol	15772	19	144	0.299272	0.368143	Carbohydrate	Pentose Metabolism
ribose	1471	19	107	0.299272	0.367014	Carbohydrate	Pentose Metabolism
arabonate/xylonate	48255	19	281	0.299272	0.328737	Carbohydrate	Pentose Metabolism
nicotinate ribonucleoside	33471	19	147	0.299272	0.422	Cofactors and Vitamins	Nicotinate and Nicotinamide Metabolism
trigonelline (N'-methylnicotinate)	32401	19	355	0.299272	0.293232	Cofactors and Vitamins	Nicotinate and Nicotinamide Metabolism
pantethine	39791	19	298	0.299272	0.242473	Cofactors and Vitamins	Pantothenate and CoA Metabolism
isoxanthopterin	27732	19	29	0.299272	0.212236	Cofactors and Vitamins	Pterin Metabolism
tricarballylate	15729	19	309	0.299272	0.371898	Energy	TCA Cycle
2-methylcitrate	37483	19	321	0.299272	0.261596	Energy	TCA Cycle
16-hydroxypalmitate	39609	19	173	0.299272	0.294981	Lipid	Fatty Acid, Monohydroxy
3-hydroxypropanoate	1556	19	257	0.299272	0.225263	Lipid	Fatty Acid, Monohydroxy
3-hydroxy-3-methylglutarate	531	19	259	0.299272	0.182691	Lipid	Mevalonate Metabolism
3-ketosphinganine	34381	19	345	0.299272	0.440089	Lipid	Sphingolipid Metabolism
sphinganine	17769	19	352	0.299272	0.37585	Lipid	Sphingolipid Metabolism
hypoxanthine	3127	19	128	0.299272	0.373457	Nucleotide	Purine Metabolism, (Hypo)Xanthine/Inosine containing
xanthine	3147	19	102	0.299272	0.315078	Nucleotide	Purine Metabolism, (Hypo)Xanthine/Inosine containing
N1-methyladenosine	15650	19	15	0.299272	0.165608	Nucleotide	Purine Metabolism, Adenine containing
adenosine	555	19	358	0.299272	0.128229	Nucleotide	Purine Metabolism, Adenine containing
cytidine 3'-monophosphate (3'-CMP)	2959	19	363	0.299272	0.177779	Nucleotide	Pyrimidine Metabolism, Cytidine containing
orotate	1505	19	119	0.299272	0.159127	Nucleotide	Pyrimidine Metabolism, Orotate containing
gluconate	587	19	336	0.299272	0.428003	Xenobiotics	Food Component/Plant
stachydrine	34384	19	134	0.299272	0.414747	Xenobiotics	Food Component/Plant
1-kestose	22012	19	239	0.299272	0.261789	Xenobiotics	Food Component/Plant
N-acetylglutamate	15720	20	141	0.263938	0.184253	Amino Acid	Glutamate Metabolism
histidine	59	20	58	0.263938	0.226648	Amino Acid	Histidine Metabolism
maltotetraose	15910	20	158	0.263938	0.220406	Carbohydrate	Glycogen Metabolism
pterin	43023	20	7	0.263938	0.23592	Cofactors and Vitamins	Pterin Metabolism
thiamin (Vitamin B1)	5341	20	138	0.263938	0.238327	Cofactors and Vitamins	Thiamine Metabolism
1-palmitoleoyl-3-oleoyl-glycerol (16:1/18:1)*	52631	20	74	0.263938	0.28857	Lipid	Diacylglycerol
1-palmitoleoyl-2-oleoyl-glycerol (16:1/18:1)*	52632	20	160	0.263938	0.132056	Lipid	Diacylglycerol
2-aminooctanoate	43343	20	57	0.263938	0.114241	Lipid	Fatty Acid, Amino
glycerophosphoglycerol	48857	20	176	0.263938	0.433852	Lipid	Glycerolipid Metabolism
inositol 1-phosphate (I1P)	43849	20	207	0.263938	0.272492	Lipid	Inositol Metabolism
glycerophosphorylcholine (GPC)	15990	20	136	0.263938	0.425646	Lipid	Phospholipid Metabolism
glycerophosphoethanolamine	37455	20	162	0.263938	0.414054	Lipid	Phospholipid Metabolism
glycerophosphoinositol*	47155	20	189	0.263938	0.368334	Lipid	Phospholipid Metabolism
N-palmitoyl-sphinganine (d18:0/16:0)	52604	20	89	0.263938	0.150558	Lipid	Sphingolipid Metabolism
gamma-glutamylhistidine	18245	20	180	0.263938	0.253715	Peptide	Gamma-glutamyl Amino Acid
pyroglutamine*	46225	21	135	0.257539	0.221934	Amino Acid	Glutamate Metabolism
cysteinylglycine	35637	21	59	0.257539	0.1475	Amino Acid	Glutathione Metabolism
pipecolate	1444	21	1	0.257539	0.187431	Amino Acid	Lysine Metabolism
N-acetylcysteine	1586	21	361	0.257539	0.256865	Amino Acid	Methionine, Cysteine, SAM and Taurine Metabolism
mannose	48153	21	249	0.257539	0.195444	Carbohydrate	Fructose, Mannose and Galactose Metabolism
isomaltose	39777	21	40	0.257539	0.409677	Carbohydrate	Glycogen Metabolism
maltotriose	44688	21	115	0.257539	0.264104	Carbohydrate	Glycogen Metabolism
maltose	15586	21	54	0.257539	0.251734	Carbohydrate	Glycogen Metabolism
glucose	48152	21	79	0.257539	0.412565	Carbohydrate	Glycolysis, Gluconeogenesis, and Pyruvate Metabolism
sedoheptulose	53237	21	46	0.257539	0.310298	Carbohydrate	Pentose Metabolism
dehydroascorbate	1659	21	146	0.257539	0.209182	Cofactors and Vitamins	Ascorbate and Aldarate Metabolism
biopterin	12358	21	24	0.257539	0.204278	Cofactors and Vitamins	Tetrahydrobiopterin Metabolism
thiamin monophosphate	15798	21	117	0.257539	0.22944	Cofactors and Vitamins	Thiamine Metabolism
citrate	1564	21	274	0.257539	0.210181	Energy	TCA Cycle
urate	1604	21	75	0.257539	0.239151	Nucleotide	Purine Metabolism, (Hypo)Xanthine/Inosine containing
guanine	32352	21	335	0.257539	0.231884	Nucleotide	Purine Metabolism, Guanine containing
gamma-glutamylisoleucine*	34456	21	305	0.257539	0.275542	Peptide	Gamma-glutamyl Amino Acid
gamma-glutamylleucine	18369	21	261	0.257539	0.200153	Peptide	Gamma-glutamyl Amino Acid
sulfate*	46960	21	229	0.257539	0.224779	Xenobiotics	Chemical
kojibiose	21040	21	72	0.257539	0.409144	Xenobiotics	Food Component/Plant
panose	37284	21	37	0.257539	0.317029	Xenobiotics	Food Component/Plant
5-oxoproline	1494	22	64	0.167727	0.160293	Amino Acid	Glutathione Metabolism
S-adenosylmethionine (SAM)	15915	22	113	0.167727	0.159798	Amino Acid	Methionine, Cysteine, SAM and Taurine Metabolism
taurine	2125	22	12	0.167727	0.154482	Amino Acid	Methionine, Cysteine, SAM and Taurine Metabolism
3,4-dihydroxyphenylacetate	18296	22	300	0.167727	0.203039	Amino Acid	Phenylalanine and Tyrosine Metabolism
tyrosine	1299	22	62	0.167727	0.191718	Amino Acid	Phenylalanine and Tyrosine Metabolism
5-methylthioadenosine (MTA)	1419	22	254	0.167727	0.169765	Amino Acid	Polyamine Metabolism
3-hydroxykynurenine	22110	22	13	0.167727	0.155291	Amino Acid	Tryptophan Metabolism
xanthurenate	15679	22	5	0.167727	0.149756	Amino Acid	Tryptophan Metabolism
kynurenate	1417	22	9	0.167727	0.141208	Amino Acid	Tryptophan Metabolism
dimethylarginine (SDMA + ADMA)	36808	22	73	0.167727	0.184549	Amino Acid	Urea cycle; Arginine and Proline Metabolism
N-monomethylarginine	43586	22	93	0.167727	0.180894	Amino Acid	Urea cycle; Arginine and Proline Metabolism
6-phosphogluconate	15442	22	194	0.167727	0.145984	Carbohydrate	Pentose Phosphate Pathway
biotin	568	22	340	0.167727	0.0906652	Cofactors and Vitamins	Biotin Metabolism
sepiapterin	48139	22	8	0.167727	0.159869	Cofactors and Vitamins	Pterin Metabolism
dihydrobiopterin	35129	22	16	0.167727	0.183896	Cofactors and Vitamins	Tetrahydrobiopterin Metabolism
palmitoylcholine	52944	22	227	0.167727	0.216352	Lipid	Fatty Acid Metabolism (Acyl Choline)
dodecanedioate	32388	22	23	0.167727	0.203855	Lipid	Fatty Acid, Dicarboxylate
tetradecanedioate	35669	22	19	0.167727	0.186183	Lipid	Fatty Acid, Dicarboxylate
adipate	21134	22	258	0.167727	0.179776	Lipid	Fatty Acid, Dicarboxylate
9,10-DiHOME	38399	22	70	0.167727	0.173798	Lipid	Fatty Acid, Dihydroxy
12,13-DiHOME	38395	22	112	0.167727	0.170498	Lipid	Fatty Acid, Dihydroxy
1-linoleoyl-2-linolenoyl-galactosylglycerol (18:2/18:3)*	54898	22	357	0.167727	0.162698	Lipid	Glycolipid Metabolism
1,2-dilinoleoyl-galactosylglycerol (18:2/18:2)*	54899	22	329	0.167727	0.160402	Lipid	Glycolipid Metabolism
oleoylcholine	53260	22	242	0.167727	0.214707	Lipid	Phospholipid Metabolism
choline	15506	22	302	0.167727	0.19767	Lipid	Phospholipid Metabolism
glycosyl-N-palmitoyl-sphingosine	53013	22	100	0.167727	0.179944	Lipid	Sphingolipid Metabolism
glycosyl-N-stearoyl-sphingosine	52234	22	116	0.167727	0.162873	Lipid	Sphingolipid Metabolism
N-palmitoyl-sphingosine (d18:1/16:0)	44877	22	201	0.167727	0.152818	Lipid	Sphingolipid Metabolism
lactosyl-N-palmitoyl-sphingosine	53010	22	96	0.167727	0.142338	Lipid	Sphingolipid Metabolism
xanthosine	15136	22	106	0.167727	0.249105	Nucleotide	Purine Metabolism, (Hypo)Xanthine/Inosine containing
allantoin	1107	22	220	0.167727	0.134557	Nucleotide	Purine Metabolism, (Hypo)Xanthine/Inosine containing
1-methyladenine	1527	22	25	0.167727	0.145298	Nucleotide	Purine Metabolism, Adenine containing
tyrosylglycine	41375	22	293	0.167727	0.178058	Peptide	Dipeptide
gamma-glutamylmethionine	44872	22	51	0.167727	0.159042	Peptide	Gamma-glutamyl Amino Acid
gamma-glutamylglutamine	2730	22	86	0.167727	0.149575	Peptide	Gamma-glutamyl Amino Acid
gamma-glutamylalanine	37063	22	269	0.167727	0.136556	Peptide	Gamma-glutamyl Amino Acid
4-hydroxyhippurate	35527	22	203	0.167727	0.168801	Xenobiotics	Benzoate Metabolism
hippurate	15753	22	346	0.167727	0.135298	Xenobiotics	Benzoate Metabolism
1-methylurate	34395	22	35	0.167727	0.149949	Xenobiotics	Xanthine Metabolism

## Sheet: B. Males
Metabolite	Metabolite ID	Module	Entry Index	Average Degree	Degree	Super pathway	Sub pathway
dimethylarginine (SDMA + ADMA)	36808	1	55	0.875305	0.875305	Amino Acid	Urea cycle; Arginine and Proline Metabolism
N-monomethylarginine	43586	1	72	0.875305	0.875305	Amino Acid	Urea cycle; Arginine and Proline Metabolism
laurate (12:0)	1645	2	31	0.676968	0.779999	Lipid	Medium Chain Fatty Acid
myristoleate (14:1n5)	32418	2	37	0.676968	0.767331	Lipid	Long Chain Fatty Acid
5-dodecenoate (12:1n7)	33968	2	99	0.676968	0.760735	Lipid	Medium Chain Fatty Acid
glycerol	15122	2	98	0.676968	0.743065	Lipid	Glycerolipid Metabolism
myristate (14:0)	1365	2	179	0.676968	0.719603	Lipid	Long Chain Fatty Acid
caprate (10:0)	1642	2	137	0.676968	0.63389	Lipid	Medium Chain Fatty Acid
citrate	1564	2	297	0.676968	0.334151	Energy	TCA Cycle
gamma-tocopherol/beta-tocopherol	52473	3	24	0.643855	0.643855	Cofactors and Vitamins	Tocopherol Metabolism
alpha-tocotrienol	37502	3	28	0.643855	0.643855	Cofactors and Vitamins	Tocopherol Metabolism
taurine	2125	4	14	0.610152	0.701052	Amino Acid	Methionine, Cysteine, SAM and Taurine Metabolism
kynurenate	1417	4	32	0.610152	0.646728	Amino Acid	Tryptophan Metabolism
xanthurenate	15679	4	6	0.610152	0.621698	Amino Acid	Tryptophan Metabolism
N-acetyltaurine	48187	4	140	0.610152	0.47113	Amino Acid	Methionine, Cysteine, SAM and Taurine Metabolism
glycylleucine	34398	5	83	0.592475	0.718285	Peptide	Dipeptide
glycylisoleucine	36659	5	89	0.592475	0.643555	Peptide	Dipeptide
valylleucinamide	37460	5	165	0.592475	0.627622	Xenobiotics	Chemical
glycylvaline	18357	5	152	0.592475	0.588434	Peptide	Dipeptide
arginine	1638	5	197	0.592475	0.384478	Amino Acid	Urea cycle; Arginine and Proline Metabolism
mannose-6-phosphate	1469	6	124	0.589387	0.749305	Carbohydrate	Fructose, Mannose and Galactose Metabolism
glucose 1-phosphate	15561	6	105	0.589387	0.745606	Carbohydrate	Glycolysis, Gluconeogenesis, and Pyruvate Metabolism
glucose 6-phosphate	31260	6	103	0.589387	0.734954	Carbohydrate	Glycolysis, Gluconeogenesis, and Pyruvate Metabolism
ribose 5-phosphate	561	6	174	0.589387	0.708122	Carbohydrate	Pentose Phosphate Pathway
glucosamine-6-phosphate	580	6	160	0.589387	0.668362	Carbohydrate	Aminosugar Metabolism
acetylphosphate	15488	6	271	0.589387	0.657717	Energy	Oxidative Phosphorylation
mannose	48153	6	256	0.589387	0.445657	Carbohydrate	Fructose, Mannose and Galactose Metabolism
sedoheptulose-7-phosphate	35649	6	80	0.589387	0.405595	Carbohydrate	Pentose Phosphate Pathway
galactose 1-phosphate	15706	6	147	0.589387	0.395623	Carbohydrate	Fructose, Mannose and Galactose Metabolism
uridine	606	6	340	0.589387	0.382926	Nucleotide	Pyrimidine Metabolism, Uracil containing
1-palmitoyl-2-linoleoyl-GPC (16:0/18:2)	42446	7	307	0.543611	0.659884	Lipid	Phospholipid Metabolism
1-oleoyl-2-linoleoyl-GPC (18:1/18:2)*	52453	7	343	0.543611	0.654495	Lipid	Phospholipid Metabolism
1-palmitoleoyl-2-linoleoyl-GPC (16:1/18:2)*	52683	7	251	0.543611	0.650306	Lipid	Phospholipid Metabolism
1-palmitoyl-2-oleoyl-GPE (16:0/18:1)	19263	7	261	0.543611	0.649106	Lipid	Phospholipid Metabolism
1-palmitoyl-2-oleoyl-GPC (16:0/18:1)	52461	7	291	0.543611	0.637477	Lipid	Phospholipid Metabolism
1,2-dilinoleoyl-GPE (18:2/18:2)*	53174	7	337	0.543611	0.628335	Lipid	Phospholipid Metabolism
1-stearoyl-2-linoleoyl-GPE (18:0/18:2)*	52446	7	286	0.543611	0.624876	Lipid	Phospholipid Metabolism
1-palmitoyl-2-linoleoyl-GPI (16:0/18:2)	52450	7	167	0.543611	0.619374	Lipid	Phospholipid Metabolism
1,2-dilinoleoyl-GPC (18:2/18:2)	52603	7	232	0.543611	0.609567	Lipid	Phospholipid Metabolism
1-oleoyl-2-linoleoyl-GPI (18:1/18:2)*	52451	7	148	0.543611	0.603623	Lipid	Phospholipid Metabolism
1-palmitoyl-2-linoleoyl-GPE (16:0/18:2)	42449	7	267	0.543611	0.59675	Lipid	Phospholipid Metabolism
1-linoleoyl-2-linolenoyl-GPC (18:2/18:3)*	53176	7	285	0.543611	0.483102	Lipid	Phospholipid Metabolism
1,2-dioleoyl-GPE (18:1/18:1)	52609	7	299	0.543611	0.443669	Lipid	Phospholipid Metabolism
1-stearoyl-2-linoleoyl-GPC (18:0/18:2)*	52452	7	235	0.543611	0.41487	Lipid	Phospholipid Metabolism
cystine	56	7	270	0.543611	0.328721	Amino Acid	Methionine, Cysteine, SAM and Taurine Metabolism
N-acetylputrescine	37496	7	194	0.543611	0.321051	Amino Acid	Polyamine Metabolism
dihydoxyphenylalanine (L-DOPA)	1576	7	203	0.543611	0.316181	Amino Acid	Phenylalanine and Tyrosine Metabolism
1-palmitoyl-GPC (16:0)	33955	8	172	0.530749	0.692844	Lipid	Lysolipid
1-oleoyl-GPS (18:1)	19260	8	122	0.530749	0.634582	Lipid	Lysolipid
1-linoleoyl-GPC (18:2)	34419	8	296	0.530749	0.623716	Lipid	Lysolipid
1-linoleoyl-GPE (18:2)*	36600	8	327	0.530749	0.621446	Lipid	Lysolipid
1-oleoyl-GPC (18:1)	48258	8	311	0.530749	0.61141	Lipid	Lysolipid
1,2-dipalmitoyl-GPC (16:0/16:0)	19130	8	125	0.530749	0.600842	Lipid	Phospholipid Metabolism
2-palmitoyl-GPC (16:0)*	35253	8	127	0.530749	0.587304	Lipid	Lysolipid
1-palmitoyl-GPI (16:0)*	35305	8	334	0.530749	0.579035	Lipid	Lysolipid
1-linoleoyl-GPS (18:2)*	43676	8	342	0.530749	0.573396	Lipid	Lysolipid
1-stearoyl-GPE (18:0)	42398	8	236	0.530749	0.4046	Lipid	Lysolipid
1-palmitoleoyl-GPC (16:1)*	33230	8	222	0.530749	0.282578	Lipid	Lysolipid
N-acetylhistamine	48679	8	121	0.530749	0.157237	Amino Acid	Histidine Metabolism
3-methylhistidine	15677	9	176	0.515971	0.595738	Amino Acid	Histidine Metabolism
1-methylhistidine	30460	9	264	0.515971	0.528926	Amino Acid	Histidine Metabolism
mannitol/sorbitol	46142	9	117	0.515971	0.515105	Carbohydrate	Fructose, Mannose and Galactose Metabolism
acetylcarnitine	32198	9	207	0.515971	0.424113	Lipid	Fatty Acid Metabolism(Acyl Carnitine)
azelate (nonanedioate)	18362	10	216	0.491785	0.564588	Lipid	Fatty Acid, Dicarboxylate
13-HODE + 9-HODE	37752	10	253	0.491785	0.521284	Lipid	Fatty Acid, Monohydroxy
sulfate*	46960	10	241	0.491785	0.389483	Xenobiotics	Chemical
valylleucine	39994	11	52	0.45258	0.607716	Peptide	Dipeptide
alanylleucine	37093	11	94	0.45258	0.607076	Peptide	Dipeptide
leucylglycine	40045	11	288	0.45258	0.603043	Peptide	Dipeptide
phenylalanylalanine	41374	11	345	0.45258	0.588116	Peptide	Dipeptide
glutaminylleucine	42994	11	153	0.45258	0.585761	Peptide	Dipeptide
isoleucylglycine	40008	11	131	0.45258	0.565597	Peptide	Dipeptide
valylglutamine	42079	11	81	0.45258	0.557906	Peptide	Dipeptide
valylglycine	40475	11	88	0.45258	0.522481	Peptide	Dipeptide
cysteinylglycine	35637	11	74	0.45258	0.476693	Amino Acid	Glutathione Metabolism
leucylalanine	40010	11	155	0.45258	0.468548	Peptide	Dipeptide
phenylalanylglycine	41370	11	209	0.45258	0.458082	Peptide	Dipeptide
prolylglycine	40703	11	168	0.45258	0.417232	Peptide	Dipeptide
N-acetylglucosamine 6-phosphate	15107	11	60	0.45258	0.297071	Carbohydrate	Aminosugar Metabolism
glycerol 3-phosphate	43847	11	284	0.45258	0.270908	Lipid	Glycerolipid Metabolism
N1-methyladenosine	15650	11	30	0.45258	0.26889	Nucleotide	Purine Metabolism, Adenine containing
deoxycarnitine	36747	11	138	0.45258	0.202037	Lipid	Carnitine Metabolism
3-hydroxykynurenine	22110	11	17	0.45258	0.196698	Amino Acid	Tryptophan Metabolism
1-palmitoyl-2-linoleoyl-galactosylglycerol (16:0/18:2)*	54901	12	246	0.447103	0.582962	Lipid	Glycolipid Metabolism
1-palmitoyl-2-linolenoyl-galactosylglycerol (16:0/18:3)*	54900	12	255	0.447103	0.567705	Lipid	Glycolipid Metabolism
1,2-dilinoleoyl-galactosylglycerol (18:2/18:2)*	54899	12	262	0.447103	0.397947	Lipid	Glycolipid Metabolism
orotate	1505	12	69	0.447103	0.239798	Nucleotide	Pyrimidine Metabolism, Orotate containing
leucine	60	13	126	0.427616	0.617038	Amino Acid	Leucine, Isoleucine and Valine Metabolism
valine	1649	13	154	0.427616	0.581132	Amino Acid	Leucine, Isoleucine and Valine Metabolism
phenylalanine	64	13	215	0.427616	0.519493	Amino Acid	Phenylalanine and Tyrosine Metabolism
lysylleucine	40020	13	250	0.427616	0.49212	Peptide	Dipeptide
isoleucine	1125	13	332	0.427616	0.488999	Amino Acid	Leucine, Isoleucine and Valine Metabolism
lysine	1301	13	266	0.427616	0.456994	Amino Acid	Lysine Metabolism
methionine	1302	13	199	0.427616	0.428319	Amino Acid	Methionine, Cysteine, SAM and Taurine Metabolism
N-acetylvaline	1591	13	245	0.427616	0.401966	Amino Acid	Leucine, Isoleucine and Valine Metabolism
gamma-glutamylleucine	18369	13	143	0.427616	0.38839	Peptide	Gamma-glutamyl Amino Acid
N6-acetyllysine	36752	13	287	0.427616	0.364	Amino Acid	Lysine Metabolism
N-palmitoyl-sphinganine (d18:0/16:0)	52604	13	111	0.427616	0.328016	Lipid	Sphingolipid Metabolism
N-palmitoyl-sphingosine (d18:1/16:0)	44877	13	130	0.427616	0.324495	Lipid	Sphingolipid Metabolism
gamma-glutamylisoleucine*	34456	13	231	0.427616	0.168048	Peptide	Gamma-glutamyl Amino Acid
glutarate (pentanedioate)	396	14	104	0.427492	0.571726	Amino Acid	Lysine Metabolism
3-hydroxy-3-methylglutarate	531	14	157	0.427492	0.477094	Lipid	Mevalonate Metabolism
N6,N6-dimethyladenosine	42081	14	248	0.427492	0.468089	Nucleotide	Purine Metabolism, Adenine containing
3-hydroxyisobutyrate	1549	14	239	0.427492	0.422943	Amino Acid	Leucine, Isoleucine and Valine Metabolism
3-hydroxypropanoate	1556	14	247	0.427492	0.403164	Lipid	Fatty Acid, Monohydroxy
glutamine	53	14	150	0.427492	0.221934	Amino Acid	Glutamate Metabolism
1-oleoyl-3-linoleoyl-glycerol (18:1/18:2)	46799	15	75	0.424611	0.600955	Lipid	Diacylglycerol
1-oleoyl-2-linoleoyl-glycerol (18:1/18:2)	46798	15	78	0.424611	0.597871	Lipid	Diacylglycerol
1-palmitoleoyl-2-oleoyl-glycerol (16:1/18:1)*	52632	15	53	0.424611	0.564248	Lipid	Diacylglycerol
1-palmitoleoyl-3-oleoyl-glycerol (16:1/18:1)*	52631	15	96	0.424611	0.529715	Lipid	Diacylglycerol
1-palmitoyl-3-linoleoyl-glycerol (16:0/18:2)*	52634	15	190	0.424611	0.44485	Lipid	Diacylglycerol
1-palmitoyl-2-linoleoyl-glycerol (16:0/18:2)*	52633	15	223	0.424611	0.428862	Lipid	Diacylglycerol
3-hydroxypalmitate	27503	15	187	0.424611	0.390102	Lipid	Fatty Acid, Monohydroxy
16-hydroxypalmitate	39609	15	113	0.424611	0.376505	Lipid	Fatty Acid, Monohydroxy
1-(1-enyl-stearoyl)-GPE (P-18:0)*	39271	15	134	0.424611	0.334749	Lipid	Lysoplasmalogen
tyrosine	1299	15	92	0.424611	0.302339	Amino Acid	Phenylalanine and Tyrosine Metabolism
dihydroxyacetone phosphate (DHAP)	15522	15	142	0.424611	0.273291	Carbohydrate	Glycolysis, Gluconeogenesis, and Pyruvate Metabolism
alpha-tocopherol	1561	15	277	0.424611	0.251849	Cofactors and Vitamins	Tocopherol Metabolism
gamma-glutamylglutamine	2730	16	173	0.419527	0.574004	Peptide	Gamma-glutamyl Amino Acid
gamma-glutamylmethionine	44872	16	50	0.419527	0.499511	Peptide	Gamma-glutamyl Amino Acid
gamma-glutamylalanine	37063	16	265	0.419527	0.461687	Peptide	Gamma-glutamyl Amino Acid
stearidonate (18:4n3)	33969	16	217	0.419527	0.366311	Lipid	Polyunsaturated Fatty Acid (n3 and n6)
glycerate	1572	16	201	0.419527	0.315967	Carbohydrate	Glycolysis, Gluconeogenesis, and Pyruvate Metabolism
campesterol	33997	16	123	0.419527	0.299681	Lipid	Sterol
myristoylcarnitine	33952	17	49	0.41796	0.586075	Lipid	Fatty Acid Metabolism(Acyl Carnitine)
palmitoleoylcarnitine*	53223	17	95	0.41796	0.576775	Lipid	Fatty Acid Metabolism(Acyl Carnitine)
linoleoylcarnitine*	46223	17	87	0.41796	0.557438	Lipid	Fatty Acid Metabolism(Acyl Carnitine)
propionylcarnitine	32452	17	79	0.41796	0.521034	Lipid	Fatty Acid Metabolism (also BCAA Metabolism)
isobutyrylcarnitine	33441	17	191	0.41796	0.432117	Amino Acid	Leucine, Isoleucine and Valine Metabolism
1-(1-enyl-stearoyl)-2-linoleoyl-GPE (P-18:0/18:2)*	52748	17	145	0.41796	0.425903	Lipid	Plasmalogen
glycerophosphoglycerol	48857	17	84	0.41796	0.387107	Lipid	Glycerolipid Metabolism
choline phosphate	34396	17	9	0.41796	0.31521	Lipid	Phospholipid Metabolism
phosphothreonine	37453	17	303	0.41796	0.293284	Amino Acid	Glycine, Serine and Threonine Metabolism
trans-4-hydroxyproline	32306	17	35	0.41796	0.255315	Amino Acid	Urea cycle; Arginine and Proline Metabolism
1-(1-enyl-stearoyl)-2-oleoyl-GPE (P-18:0/18:1)	52614	17	73	0.41796	0.247308	Lipid	Plasmalogen
pyruvate	22250	18	275	0.40553	0.594732	Carbohydrate	Glycolysis, Gluconeogenesis, and Pyruvate Metabolism
mesaconate (methylfumarate)	18493	18	242	0.40553	0.593328	Energy	TCA Cycle
citraconate/glutaconate	47076	18	227	0.40553	0.588289	Energy	TCA Cycle
alpha-ketoglutarate	528	18	322	0.40553	0.548319	Energy	TCA Cycle
5-oxoproline	1494	18	118	0.40553	0.378111	Amino Acid	Glutathione Metabolism
pyridoxate	31555	18	171	0.40553	0.338147	Cofactors and Vitamins	Vitamin B6 Metabolism
stearoylcarnitine	34409	18	206	0.40553	0.334767	Lipid	Fatty Acid Metabolism(Acyl Carnitine)
alanine	1126	18	326	0.40553	0.324216	Amino Acid	Alanine and Aspartate Metabolism
succinimide	41888	18	328	0.40553	0.319563	Xenobiotics	Chemical
N-acetylarginine	33953	18	185	0.40553	0.319358	Amino Acid	Urea cycle; Arginine and Proline Metabolism
mevalonate 5-phosphate	38627	18	91	0.40553	0.274509	Lipid	Mevalonate Metabolism
myo-inositol	1124	18	13	0.40553	0.253027	Lipid	Inositol Metabolism
isoxanthopterin	27732	19	23	0.394293	0.458662	Cofactors and Vitamins	Pterin Metabolism
2'-deoxyinosine	15076	19	224	0.394293	0.452031	Nucleotide	Purine Metabolism, (Hypo)Xanthine/Inosine containing
2'-deoxyguanosine	1411	19	272	0.394293	0.385875	Nucleotide	Purine Metabolism, Guanine containing
putrescine	1408	19	7	0.394293	0.280605	Amino Acid	Polyamine Metabolism
oleoylcarnitine	35160	20	263	0.381789	0.551977	Lipid	Fatty Acid Metabolism(Acyl Carnitine)
palmitoylcarnitine	44681	20	220	0.381789	0.551753	Lipid	Fatty Acid Metabolism(Acyl Carnitine)
succinate	1437	20	278	0.381789	0.340291	Energy	TCA Cycle
hexanoylglycine	35436	20	213	0.381789	0.29321	Lipid	Fatty Acid Metabolism(Acyl Glycine)
2-aminooctanoate	43343	20	45	0.381789	0.171711	Lipid	Fatty Acid, Amino
2-phosphoglycerate	35629	21	44	0.3755	0.505296	Carbohydrate	Glycolysis, Gluconeogenesis, and Pyruvate Metabolism
nicotinamide ribonucleotide (NMN)	22152	21	26	0.3755	0.502872	Cofactors and Vitamins	Nicotinate and Nicotinamide Metabolism
cytidine 5'-monophosphate (5'-CMP)	2372	21	18	0.3755	0.487723	Nucleotide	Pyrimidine Metabolism, Cytidine containing
adenosine 5'-monophosphate (AMP)	32342	21	114	0.3755	0.467443	Nucleotide	Purine Metabolism, Adenine containing
phosphoenolpyruvate (PEP)	597	21	56	0.3755	0.466219	Carbohydrate	Glycolysis, Gluconeogenesis, and Pyruvate Metabolism
N-acetylcysteine	1586	21	258	0.3755	0.418712	Amino Acid	Methionine, Cysteine, SAM and Taurine Metabolism
cytidine-5'-diphosphoethanolamine	34410	21	128	0.3755	0.406704	Lipid	Phospholipid Metabolism
gulonic acid*	46957	21	240	0.3755	0.395134	Cofactors and Vitamins	Ascorbate and Aldarate Metabolism
N-acetyl-glucosamine 1-phosphate	15741	21	70	0.3755	0.394624	Carbohydrate	Aminosugar Metabolism
glucuronate	15443	21	129	0.3755	0.390271	Carbohydrate	Aminosugar Metabolism
3-phosphoglycerate	1414	21	331	0.3755	0.387652	Carbohydrate	Glycolysis, Gluconeogenesis, and Pyruvate Metabolism
Isobar: fructose 1,6-diphosphate, glucose 1,6-diphosphate, myo-inositol 1,4 or 1,3-diphosphate	46896	21	293	0.3755	0.357112	Carbohydrate	Glycolysis, Gluconeogenesis, and Pyruvate Metabolism
aspartate	443	21	320	0.3755	0.331976	Amino Acid	Alanine and Aspartate Metabolism
ribose 1-phosphate	1763	21	302	0.3755	0.276146	Carbohydrate	Pentose Phosphate Pathway
6-phosphogluconate	15442	21	273	0.3755	0.225681	Carbohydrate	Pentose Phosphate Pathway
ergothioneine	37459	21	323	0.3755	0.199883	Xenobiotics	Food Component/Plant
malonate	15872	21	330	0.3755	0.170049	Lipid	Fatty Acid Synthesis
3-hydroxydecanoate	22053	22	149	0.373492	0.550729	Lipid	Fatty Acid, Monohydroxy
3-hydroxylaurate	32457	22	85	0.373492	0.549818	Lipid	Fatty Acid, Monohydroxy
3-hydroxyoctanoate	22001	22	166	0.373492	0.516453	Lipid	Fatty Acid, Monohydroxy
3-hydroxysebacate	31943	22	163	0.373492	0.39583	Lipid	Fatty Acid, Monohydroxy
3-hydroxymyristate	21158	22	175	0.373492	0.310821	Lipid	Fatty Acid, Monohydroxy
2-methylserine	53229	22	234	0.373492	0.296223	Amino Acid	Glycine, Serine and Threonine Metabolism
histamine	1574	22	43	0.373492	0.291655	Amino Acid	Histidine Metabolism
7-methylguanosine	31580	22	344	0.373492	0.284376	Nucleotide	Purine Metabolism, Guanine containing
pipecolate	1444	22	1	0.373492	0.165519	Amino Acid	Lysine Metabolism
mevalonate	39583	23	219	0.358803	0.532921	Lipid	Mevalonate Metabolism
mevalonolactone	48118	23	226	0.358803	0.523952	Lipid	Mevalonate Metabolism
fumarate	1643	23	100	0.358803	0.273124	Energy	TCA Cycle
homoserine lactone	15696	23	289	0.358803	0.257608	Amino Acid	Glycine, Serine and Threonine Metabolism
sarcosine	1516	23	27	0.358803	0.206411	Amino Acid	Glycine, Serine and Threonine Metabolism
quinate	18335	24	315	0.358224	0.547564	Xenobiotics	Food Component/Plant
erythronate*	42420	24	283	0.358224	0.492753	Carbohydrate	Aminosugar Metabolism
aconitate [cis or trans]	46173	24	325	0.358224	0.490763	Energy	TCA Cycle
arabonate/xylonate	48255	24	313	0.358224	0.453509	Carbohydrate	Pentose Metabolism
trigonelline (N'-methylnicotinate)	32401	24	336	0.358224	0.452333	Cofactors and Vitamins	Nicotinate and Nicotinamide Metabolism
fructose	48195	24	257	0.358224	0.441898	Carbohydrate	Fructose, Mannose and Galactose Metabolism
methyl-4-hydroxybenzoate	34386	24	244	0.358224	0.441512	Xenobiotics	Benzoate Metabolism
4-hydroxybenzoate	21133	24	204	0.358224	0.385044	Xenobiotics	Benzoate Metabolism
propionylglycine	31932	24	181	0.358224	0.367542	Lipid	Fatty Acid Metabolism (also BCAA Metabolism)
sucrose	1519	24	164	0.358224	0.363105	Carbohydrate	Disaccharides and Oligosaccharides
2-methylcitrate	37483	24	210	0.358224	0.357857	Energy	TCA Cycle
pyroglutamine*	46225	24	65	0.358224	0.352043	Amino Acid	Glutamate Metabolism
biliverdin	2137	24	107	0.358224	0.348239	Cofactors and Vitamins	Hemoglobin and Porphyrin Metabolism
methylsuccinate	15745	24	276	0.358224	0.335877	Amino Acid	Leucine, Isoleucine and Valine Metabolism
4-hydroxyhippurate	35527	24	198	0.358224	0.332875	Xenobiotics	Benzoate Metabolism
erythritol	20699	24	238	0.358224	0.32797	Xenobiotics	Food Component/Plant
methylmalonate (MMA)	1496	24	109	0.358224	0.32262	Lipid	Fatty Acid Metabolism (also BCAA Metabolism)
1-kestose	22012	24	180	0.358224	0.309135	Xenobiotics	Food Component/Plant
ornithine	1493	24	146	0.358224	0.297113	Amino Acid	Urea cycle; Arginine and Proline Metabolism
phytosphingosine	1510	24	318	0.358224	0.275434	Lipid	Sphingolipid Metabolism
hippurate	15753	24	274	0.358224	0.231192	Xenobiotics	Benzoate Metabolism
N-acetylmethionine	1589	24	346	0.358224	0.200718	Amino Acid	Methionine, Cysteine, SAM and Taurine Metabolism
allantoin	1107	24	218	0.358224	0.11205	Nucleotide	Purine Metabolism, (Hypo)Xanthine/Inosine containing
1-(1-enyl-palmitoyl)-2-oleoyl-GPE (P-16:0/18:1)*	52477	25	119	0.342024	0.517029	Lipid	Plasmalogen
1-(1-enyl-palmitoyl)-2-linoleoyl-GPC (P-16:0/18:2)*	52682	25	16	0.342024	0.505394	Lipid	Plasmalogen
1-(1-enyl-palmitoyl)-2-oleoyl-GPC (P-16:0/18:1)*	52478	25	184	0.342024	0.483649	Lipid	Plasmalogen
1-(1-enyl-palmitoyl)-2-linoleoyl-GPE (P-16:0/18:2)*	52677	25	281	0.342024	0.386142	Lipid	Plasmalogen
biopterin	12358	25	19	0.342024	0.325303	Cofactors and Vitamins	Tetrahydrobiopterin Metabolism
1-(1-enyl-palmitoyl)-2-palmitoleoyl-GPC (P-16:0/16:1)*	52713	25	40	0.342024	0.319494	Lipid	Plasmalogen
phosphoethanolamine	1600	25	8	0.342024	0.313428	Lipid	Phospholipid Metabolism
1-(1-enyl-palmitoyl)-GPE (P-16:0)*	39270	25	324	0.342024	0.310956	Lipid	Lysoplasmalogen
dihydrobiopterin	35129	25	41	0.342024	0.283217	Cofactors and Vitamins	Tetrahydrobiopterin Metabolism
asparagine	512	25	102	0.342024	0.25989	Amino Acid	Alanine and Aspartate Metabolism
threonine	1284	25	120	0.342024	0.203717	Amino Acid	Glycine, Serine and Threonine Metabolism
sepiapterin	48139	25	5	0.342024	0.196065	Cofactors and Vitamins	Pterin Metabolism
uridine-2',3'-cyclic monophosphate	37137	26	280	0.333457	0.443657	Nucleotide	Pyrimidine Metabolism, Uracil containing
guanosine-2',3'-cyclic monophosphate	37139	26	314	0.333457	0.423271	Nucleotide	Purine Metabolism, Guanine containing
tryptophan	54	26	77	0.333457	0.418339	Amino Acid	Tryptophan Metabolism
cytidine 2',3'-cyclic monophosphate	37465	26	228	0.333457	0.413112	Nucleotide	Pyrimidine Metabolism, Cytidine containing
uridine 3'-monophosphate (3'-UMP)	39764	26	221	0.333457	0.399209	Nucleotide	Pyrimidine Metabolism, Uracil containing
hypoxanthine	3127	26	200	0.333457	0.371126	Nucleotide	Purine Metabolism, (Hypo)Xanthine/Inosine containing
uracil	605	26	254	0.333457	0.356859	Nucleotide	Pyrimidine Metabolism, Uracil containing
adenosine 3'-monophosphate (3'-AMP)	35142	26	211	0.333457	0.352127	Nucleotide	Purine Metabolism, Adenine containing
riboflavin (Vitamin B2)	1827	26	158	0.333457	0.32121	Cofactors and Vitamins	Riboflavin Metabolism
adenosine-2',3'-cyclic monophosphate	37467	26	202	0.333457	0.320798	Nucleotide	Purine Metabolism, Adenine containing
kynurenine	15140	26	46	0.333457	0.310112	Amino Acid	Tryptophan Metabolism
pantethine	39791	26	108	0.333457	0.30904	Cofactors and Vitamins	Pantothenate and CoA Metabolism
cytidine	514	26	133	0.333457	0.30067	Nucleotide	Pyrimidine Metabolism, Cytidine containing
biotin	568	26	156	0.333457	0.291273	Cofactors and Vitamins	Biotin Metabolism
heme	41754	26	282	0.333457	0.290256	Cofactors and Vitamins	Hemoglobin and Porphyrin Metabolism
N6-carboxymethyllysine	36713	26	59	0.333457	0.290197	Carbohydrate	Advanced Glycation End-product
beta-sitosterol	27414	26	136	0.333457	0.217508	Lipid	Sterol
ergosterol	27553	26	169	0.333457	0.173459	Lipid	Sterol
palmitoloelycholine	53257	27	268	0.3141	0.415595	Lipid	Phospholipid Metabolism
choline	15506	27	312	0.3141	0.372394	Lipid	Phospholipid Metabolism
palmitoylcholine	52944	27	319	0.3141	0.365156	Lipid	Fatty Acid Metabolism (Acyl Choline)
13-methylmyristate	38293	27	225	0.3141	0.347915	Lipid	Fatty Acid, Branched
sedoheptulose	53237	27	68	0.3141	0.313346	Carbohydrate	Pentose Metabolism
ethylmalonate	15765	27	208	0.3141	0.234335	Amino Acid	Leucine, Isoleucine and Valine Metabolism
flavin mononucleotide (FMN)	15797	27	115	0.3141	0.149956	Cofactors and Vitamins	Riboflavin Metabolism
2'-deoxycytidine	15949	28	86	0.308221	0.391455	Nucleotide	Pyrimidine Metabolism, Cytidine containing
thymidine	2183	28	110	0.308221	0.381121	Nucleotide	Pyrimidine Metabolism, Thymine containing
7-methylguanine	35114	28	2	0.308221	0.346796	Nucleotide	Purine Metabolism, Guanine containing
2'-deoxyuridine	1412	28	67	0.308221	0.345842	Nucleotide	Pyrimidine Metabolism, Uracil containing
lactosyl-N-palmitoyl-sphingosine	53010	28	71	0.308221	0.343171	Lipid	Sphingolipid Metabolism
N-acetylhistidine	33946	28	101	0.308221	0.305503	Amino Acid	Histidine Metabolism
1-methylurate	34395	28	39	0.308221	0.287964	Xenobiotics	Xanthine Metabolism
histidine	59	28	62	0.308221	0.257856	Amino Acid	Histidine Metabolism
1-methylhistamine	43831	28	10	0.308221	0.219023	Amino Acid	Histidine Metabolism
gamma-aminobutyrate (GABA)	1416	28	295	0.308221	0.203477	Amino Acid	Glutamate Metabolism
N2,N2-dimethylguanine	37081	29	12	0.307529	0.460402	Nucleotide	Purine Metabolism, Guanine containing
2'-O-methylguanosine	36811	29	20	0.307529	0.398747	Nucleotide	Purine Metabolism, Guanine containing
N6,N6,N6-trimethyllysine	1498	29	3	0.307529	0.358391	Amino Acid	Lysine Metabolism
1-methyladenine	1527	29	64	0.307529	0.342357	Nucleotide	Purine Metabolism, Adenine containing
urate	1604	29	29	0.307529	0.302691	Nucleotide	Purine Metabolism, (Hypo)Xanthine/Inosine containing
1,2-dipalmitoleoyl-GPC (16:1/16:1)*	52472	29	259	0.307529	0.282604	Lipid	Phospholipid Metabolism
S-adenosylmethionine (SAM)	15915	29	21	0.307529	0.280365	Amino Acid	Methionine, Cysteine, SAM and Taurine Metabolism
1-palmitoyl-2-palmitoleoyl-GPC (16:0/16:1)*	52470	29	294	0.307529	0.224967	Lipid	Phospholipid Metabolism
adenine	554	29	63	0.307529	0.221848	Nucleotide	Purine Metabolism, Adenine containing
adenosine	555	29	304	0.307529	0.202917	Nucleotide	Purine Metabolism, Adenine containing
glycerophosphoinositol*	47155	30	308	0.302469	0.397586	Lipid	Phospholipid Metabolism
glycerophosphoethanolamine	37455	30	329	0.302469	0.389695	Lipid	Phospholipid Metabolism
methionine sulfone	44878	30	269	0.302469	0.376916	Amino Acid	Methionine, Cysteine, SAM and Taurine Metabolism
methionine sulfoxide	18374	30	15	0.302469	0.369981	Amino Acid	Methionine, Cysteine, SAM and Taurine Metabolism
5-aminolevulinate	2290	30	97	0.302469	0.346217	Cofactors and Vitamins	Hemoglobin and Porphyrin Metabolism
glycerophosphorylcholine (GPC)	15990	30	305	0.302469	0.342132	Lipid	Phospholipid Metabolism
N-acetylmethionine sulfoxide	45428	30	54	0.302469	0.302193	Amino Acid	Methionine, Cysteine, SAM and Taurine Metabolism
serine	1648	30	106	0.302469	0.272965	Amino Acid	Glycine, Serine and Threonine Metabolism
glycerol 2-phosphate	27728	30	301	0.302469	0.266809	Xenobiotics	Chemical
arabitol/xylitol	48885	30	177	0.302469	0.264005	Carbohydrate	Pentose Metabolism
ribulose/xylulose	54671	30	135	0.302469	0.239712	Carbohydrate	Pentose Metabolism
cystathionine	15705	30	38	0.302469	0.23908	Amino Acid	Methionine, Cysteine, SAM and Taurine Metabolism
UDP-N-acetylglucosamine	35162	30	162	0.302469	0.223058	Carbohydrate	Nucleotide Sugar
thiamin monophosphate	15798	30	196	0.302469	0.204224	Cofactors and Vitamins	Thiamine Metabolism
3-hydroxysuberate	31936	31	249	0.300052	0.411047	Lipid	Fatty Acid, Monohydroxy
adipate	21134	31	183	0.300052	0.367335	Lipid	Fatty Acid, Dicarboxylate
tetradecanedioate	35669	31	34	0.300052	0.338903	Lipid	Fatty Acid, Dicarboxylate
12,13-DiHOME	38395	31	90	0.300052	0.325985	Lipid	Fatty Acid, Dihydroxy
dodecanedioate	32388	31	214	0.300052	0.324061	Lipid	Fatty Acid, Dicarboxylate
9,10-DiHOME	38399	31	36	0.300052	0.300037	Lipid	Fatty Acid, Dihydroxy
4-imidazoleacetate	32349	31	279	0.300052	0.281177	Amino Acid	Histidine Metabolism
4-guanidinobutanoate	15681	31	292	0.300052	0.251692	Amino Acid	Guanidino and Acetamido Metabolism
1-methylimidazoleacetate	32350	31	230	0.300052	0.232679	Amino Acid	Histidine Metabolism
N-acetyl-beta-alanine	37432	31	22	0.300052	0.167607	Nucleotide	Pyrimidine Metabolism, Uracil containing
alpha-hydroxyisocaproate	22132	32	182	0.283386	0.439197	Amino Acid	Leucine, Isoleucine and Valine Metabolism
alpha-hydroxyisovalerate	46537	32	178	0.283386	0.416645	Amino Acid	Leucine, Isoleucine and Valine Metabolism
2-hydroxy-3-methylvalerate	36746	32	237	0.283386	0.41421	Amino Acid	Leucine, Isoleucine and Valine Metabolism
phenyllactate (PLA)	22130	32	212	0.283386	0.407405	Amino Acid	Phenylalanine and Tyrosine Metabolism
tricarballylate	15729	32	233	0.283386	0.4016	Energy	TCA Cycle
ribose	1471	32	170	0.283386	0.38024	Carbohydrate	Pentose Metabolism
N-acetylthreonine	33939	32	317	0.283386	0.370231	Amino Acid	Glycine, Serine and Threonine Metabolism
gluconate	587	32	316	0.283386	0.364297	Xenobiotics	Food Component/Plant
carboxyethyl-GABA	40007	32	306	0.283386	0.346446	Amino Acid	Glutamate Metabolism
3-(4-hydroxyphenyl)lactate	32197	32	141	0.283386	0.336242	Amino Acid	Phenylalanine and Tyrosine Metabolism
N-acetylphenylalanine	33950	32	335	0.283386	0.320382	Amino Acid	Phenylalanine and Tyrosine Metabolism
stachydrine	34384	32	193	0.283386	0.316847	Xenobiotics	Food Component/Plant
betaine	3141	32	188	0.283386	0.313158	Amino Acid	Glycine, Serine and Threonine Metabolism
N-acetylleucine	1587	32	339	0.283386	0.307774	Amino Acid	Leucine, Isoleucine and Valine Metabolism
ribitol	15772	32	116	0.283386	0.305541	Carbohydrate	Pentose Metabolism
pyridoxamine	2150	32	338	0.283386	0.296644	Cofactors and Vitamins	Vitamin B6 Metabolism
N-acetylasparagine	33942	32	290	0.283386	0.28604	Amino Acid	Alanine and Aspartate Metabolism
N-acetylglucosamine/N-acetylgalactosamine	46539	32	144	0.283386	0.268631	Carbohydrate	Aminosugar Metabolism
citrulline	2132	32	189	0.283386	0.25392	Amino Acid	Urea cycle; Arginine and Proline Metabolism
S-adenosylhomocysteine (SAH)	42382	32	47	0.283386	0.251065	Amino Acid	Methionine, Cysteine, SAM and Taurine Metabolism
N-acetylserine	37076	32	252	0.283386	0.245719	Amino Acid	Glycine, Serine and Threonine Metabolism
4-methyl-2-oxopentanoate	22116	32	310	0.283386	0.243867	Amino Acid	Leucine, Isoleucine and Valine Metabolism
N-delta-acetylornithine	43249	32	243	0.283386	0.241465	Amino Acid	Urea cycle; Arginine and Proline Metabolism
N-acetylglycine	27710	32	333	0.283386	0.235004	Amino Acid	Glycine, Serine and Threonine Metabolism
3-methyl-2-oxobutyrate	44526	32	341	0.283386	0.21685	Amino Acid	Leucine, Isoleucine and Valine Metabolism
N-acetylglutamine	33943	32	205	0.283386	0.207176	Amino Acid	Glutamate Metabolism
3-ureidopropionate	3155	32	300	0.283386	0.204827	Nucleotide	Pyrimidine Metabolism, Uracil containing
argininosuccinate	15497	32	139	0.283386	0.198415	Amino Acid	Urea cycle; Arginine and Proline Metabolism
3-aminoisobutyrate	1566	32	4	0.283386	0.184416	Nucleotide	Pyrimidine Metabolism, Thymine containing
N-acetylalanine	1585	32	82	0.283386	0.168574	Amino Acid	Alanine and Aspartate Metabolism
methylphosphate	37070	32	298	0.283386	0.139541	Nucleotide	Purine and Pyrimidine Metabolism
thioproline	53231	32	229	0.283386	0.136592	Amino Acid	Tryptophan Metabolism
N-acetylglutamate	15720	32	195	0.283386	0.132763	Amino Acid	Glutamate Metabolism
isomaltose	39777	33	66	0.227481	0.347043	Carbohydrate	Glycogen Metabolism
panose	37284	33	42	0.227481	0.339321	Xenobiotics	Food Component/Plant
glucose	48152	33	57	0.227481	0.337183	Carbohydrate	Glycolysis, Gluconeogenesis, and Pyruvate Metabolism
kojibiose	21040	33	186	0.227481	0.31813	Xenobiotics	Food Component/Plant
maltopentaose	35163	33	61	0.227481	0.303643	Carbohydrate	Glycogen Metabolism
xanthosine	15136	33	93	0.227481	0.294635	Nucleotide	Purine Metabolism, (Hypo)Xanthine/Inosine containing
xanthine	3147	33	48	0.227481	0.258542	Nucleotide	Purine Metabolism, (Hypo)Xanthine/Inosine containing
glycosyl-N-stearoyl-sphingosine	52234	33	159	0.227481	0.256874	Lipid	Sphingolipid Metabolism
thymine	604	33	347	0.227481	0.244152	Nucleotide	Pyrimidine Metabolism, Thymine containing
spermidine	485	33	192	0.227481	0.238595	Amino Acid	Polyamine Metabolism
glycosyl-N-palmitoyl-sphingosine	53013	33	112	0.227481	0.21701	Lipid	Sphingolipid Metabolism
proline	1898	33	51	0.227481	0.18934	Amino Acid	Urea cycle; Arginine and Proline Metabolism
maltotetraose	15910	33	161	0.227481	0.188274	Carbohydrate	Glycogen Metabolism
maltotriose	44688	33	132	0.227481	0.188221	Carbohydrate	Glycogen Metabolism
maltose	15586	33	58	0.227481	0.187395	Carbohydrate	Glycogen Metabolism
pterin	43023	33	11	0.227481	0.186641	Cofactors and Vitamins	Pterin Metabolism
beta-hydroxyisovalerate	12129	33	321	0.227481	0.184828	Amino Acid	Leucine, Isoleucine and Valine Metabolism
pantothenate	1508	33	25	0.227481	0.184332	Cofactors and Vitamins	Pantothenate and CoA Metabolism
N-methylalanine	37069	33	151	0.227481	0.171652	Amino Acid	Alanine and Aspartate Metabolism
lactate	527	33	309	0.227481	0.166304	Carbohydrate	Glycolysis, Gluconeogenesis, and Pyruvate Metabolism
dehydroascorbate	1659	33	260	0.227481	0.158834	Cofactors and Vitamins	Ascorbate and Aldarate Metabolism
3-hydroxybutyrylcarnitine (2)	52984	33	33	0.227481	0.155612	Lipid	Fatty Acid Metabolism(Acyl Carnitine)
3,4-dihydroxyphenylacetate	18296	33	76	0.227481	0.115509	Amino Acid	Phenylalanine and Tyrosine Metabolism
