# Supplementary material for: Systems genetics of the Drosophila metabolome
Source: Genome Res. 2020 Mar;30(3):392–405. doi: 10.1101/gr.243030.118 (PMC7111526; doi:10.1101/gr.243030.118)
Supplement: Supplemental Material [file supp_gr.243030.118_Supplemental_Table_S5.xlsx.xlsx]

## Sheet: A. Females
Supplemental Table S5. Polymorphisms associated with different metabolites at a Bonferroni threshold of P ≤ 3.2E-8. (A) Females. (B) Males.
Metabolite	Metabolite ID	SNP ID	Flybase ID	Gene Symbol	SNP Location	Position	Minor Allele	Major Allele	Ref Allele	MAF	Minor Allele Count	Major Allele Count	Effect Size	P-value	Regulation Annotation
1,2-dioleoyl-GPC (18:1/18:1)*	52457	3L_12937171_SNP	Intergenic	Intergenic	Intergenic		T	G	G	0.1765	6	28	-0.5964	2.15002e-08	-
1,2-dioleoyl-GPC (18:1/18:1)*	52457	3L_12937053_SNP	Intergenic	Intergenic	Intergenic		G	T	T	0.1875	6	26	-0.5978	2.66538e-08	-
1,2-dioleoyl-GPE (18:1/18:1)	52609	2L_5907732_SNP	FBgn0043362	bchs	INTRON	0	G	A	G	0.225	9	31	-0.4364	2.21709e-08	(TF_binding_site|BDTNP1_TFBS_da|FBsf0000321565);(TF_binding_site|BDTNP1_TFBS_dl|FBsf0000296900);(TF_binding_site|BDTNP1_TFBS_hb|FBsf0000290609);(TF_binding_site|BDTNP1_TFBS_Med|FBsf0000277683);(TF_binding_site|BDTNP1_TFBS_slp1|FBsf0000271709);(TF_binding_site|BDTNP1_TFBS_sna|FBsf0000268377);(TF_binding_site|BDTNP1_TFBS_twi|FBsf0000200955);(TF_binding_site|BDTNP1_TFBS_z|FBsf0000196038);(TF_binding…
1,2-dioleoyl-GPE (18:1/18:1)	52609	2L_5908404_SNP	FBgn0043362	bchs	SYNONYMOUS_CODING	0	C	T	T	0.2308	9	30	-0.4357	2.65331e-08	(TF_binding_site|BDTNP1_TFBS_dl|FBsf0000296901);(TF_binding_site|BDTNP1_TFBS_twi|FBsf0000200956);(TF_binding_site|mE1_TFBS_Trl|FBsf0000337255)
1,2-dioleoyl-GPE (18:1/18:1)	52609	2L_5908404_SNP	FBgn0031749	CG14000	DOWNSTREAM	523	C	T	T	0.2308	9	30	-0.4357	2.65331e-08	(TF_binding_site|BDTNP1_TFBS_dl|FBsf0000296901);(TF_binding_site|BDTNP1_TFBS_twi|FBsf0000200956);(TF_binding_site|mE1_TFBS_Trl|FBsf0000337255)
1,2-dipalmitoleoyl-GPC (16:1/16:1)*	52472	2R_523199_SNP	Intergenic	Intergenic	Intergenic		G	C	C	0.15	6	34	-0.6982	2.17419e-08	(transposable_element|FlyBase|FBti0061657)
1-linoleoyl-2-linolenoyl-galactosylglycerol (18:2/18:3)*	54898	2R_2053582_SNP	FBgn0000546	EcR	INTRON	0	A	C	C	0.1282	5	34	-0.8477	5.17174e-09	(TF_binding_site|BDTNP1_TFBS_dl|FBsf0000300159);(TF_binding_site|mE1_TFBS_cad|FBsf0000245871)
1-linoleoyl-2-linolenoyl-galactosylglycerol (18:2/18:3)*	54898	2R_2053582_SNP	FBgn0011887	tRNA:K2:42Aa	DOWNSTREAM	21	A	C	C	0.1282	5	34	-0.8477	5.17174e-09	(TF_binding_site|BDTNP1_TFBS_dl|FBsf0000300159);(TF_binding_site|mE1_TFBS_cad|FBsf0000245871)
1-linoleoyl-2-linolenoyl-galactosylglycerol (18:2/18:3)*	54898	2R_2053582_SNP	FBgn0011880	tRNA:I:42A	UPSTREAM	74	A	C	C	0.1282	5	34	-0.8477	5.17174e-09	(TF_binding_site|BDTNP1_TFBS_dl|FBsf0000300159);(TF_binding_site|mE1_TFBS_cad|FBsf0000245871)
1-linoleoyl-2-linolenoyl-galactosylglycerol (18:2/18:3)*	54898	X_16095959_SNP	Intergenic	Intergenic	Intergenic		A	T	T	0.1026	4	35	-0.9069	2.9801e-08	(TF_binding_site|BDTNP1_TFBS_dl|FBsf0000319459);(TF_binding_site|BDTNP1_TFBS_twi|FBsf0000263420)
1-methyladenine	1527	2R_18612005_DEL	FBgn0028371	jbug	INTRON	0	T	TAT	TAT	0.1795	7	32	-0.2855	6.92749e-09	(TF_binding_site|BDTNP1_TFBS_sna|FBsf0000268028);(TF_binding_site|mE1_TFBS_inv|FBsf0000236866)
1-methyladenine	1527	2R_18611969_SNP	FBgn0028371	jbug	INTRON	0	G	C	C	0.15	6	34	-0.3054	1.09927e-08	(TF_binding_site|BDTNP1_TFBS_sna|FBsf0000268028);(TF_binding_site|mE1_TFBS_inv|FBsf0000236866)
1-methyladenine	1527	2R_18612010_SNP	FBgn0028371	jbug	INTRON	0	G	A	A	0.15	6	34	-0.3054	1.09927e-08	(TF_binding_site|BDTNP1_TFBS_sna|FBsf0000268028);(TF_binding_site|mE1_TFBS_inv|FBsf0000236866)
1-methyladenine	1527	2R_18612012_SNP	FBgn0028371	jbug	INTRON	0	G	C	C	0.15	6	34	-0.3054	1.09927e-08	(TF_binding_site|BDTNP1_TFBS_sna|FBsf0000268028);(TF_binding_site|mE1_TFBS_inv|FBsf0000236866)
1-methyladenine	1527	2R_18612029_SNP	FBgn0028371	jbug	INTRON	0	A	G	G	0.15	6	34	-0.3054	1.09927e-08	(TF_binding_site|BDTNP1_TFBS_sna|FBsf0000268028);(TF_binding_site|mE1_TFBS_HSA|FBsf0000359533);(TF_binding_site|mE1_TFBS_inv|FBsf0000236866)
1-methyladenine	1527	2R_1013085_DEL	FBgn0026238	gus	INTRON	0	G	GTTAG	GTTAG	0.1081	4	33	-0.3599	2.31184e-08	-
1-methylurate	34395	3L_9590038_SNP	FBgn0261555	CG42673	DOWNSTREAM	225	T	G	G	0.1026	4	35	-0.2925	1.99835e-08	-
1-methylurate	34395	3L_9590038_SNP	FBgn0036013	CG14177	UPSTREAM	916	T	G	G	0.1026	4	35	-0.2925	1.99835e-08	-
1-methylurate	34395	3L_9586549_SNP	FBgn0261555	CG42673	INTRON	0	T	A	A	0.1	4	36	-0.29	2.86174e-08	(TF_binding_site|BDTNP1_TFBS_sna|FBsf0000269268);(TF_binding_site|mE1_TFBS_chinmo|FBsf0000210024)
1-methylurate	34395	3L_9586558_SNP	FBgn0261555	CG42673	INTRON	0	T	C	C	0.1	4	36	-0.29	2.86174e-08	(TF_binding_site|BDTNP1_TFBS_sna|FBsf0000269268);(TF_binding_site|mE1_TFBS_chinmo|FBsf0000210024)
1-methylurate	34395	3L_9586588_SNP	FBgn0261555	CG42673	INTRON	0	G	C	C	0.1	4	36	-0.29	2.86174e-08	(TF_binding_site|BDTNP1_TFBS_sna|FBsf0000269268);(TF_binding_site|mE1_TFBS_chinmo|FBsf0000210024)
1-oleoyl-2-linoleoyl-GPI (18:1/18:2)*	52451	X_6331078_SNP	FBgn0259242	CG42340	INTRON	0	A	G	G	0.1282	5	34	-0.4412	4.1174e-10	-
1-palmitoyl-2-oleoyl-GPC (16:0/18:1)	52461	3R_23119131_INS	FBgn0039510	CG3339	DOWNSTREAM	876	AC	A	A	0.3056	11	25	-0.3631	1.41694e-08	-
1-palmitoyl-2-oleoyl-GPC (16:0/18:1)	52461	2L_5908404_SNP	FBgn0043362	bchs	SYNONYMOUS_CODING	0	C	T	T	0.2308	9	30	-0.3783	2.69988e-08	(TF_binding_site|BDTNP1_TFBS_dl|FBsf0000296901);(TF_binding_site|BDTNP1_TFBS_twi|FBsf0000200956);(TF_binding_site|mE1_TFBS_Trl|FBsf0000337255)
1-palmitoyl-2-oleoyl-GPC (16:0/18:1)	52461	2L_5908404_SNP	FBgn0031749	CG14000	DOWNSTREAM	523	C	T	T	0.2308	9	30	-0.3783	2.69988e-08	(TF_binding_site|BDTNP1_TFBS_dl|FBsf0000296901);(TF_binding_site|BDTNP1_TFBS_twi|FBsf0000200956);(TF_binding_site|mE1_TFBS_Trl|FBsf0000337255)
1-palmitoyl-GPE (16:0)	35631	2R_17652969_SNP	FBgn0050395	CG30395	UPSTREAM	25	A	T	T	0.1026	4	35	-2.806	1.145e-08	-
1-palmitoyl-GPE (16:0)	35631	2R_17652969_SNP	FBgn0264716	CR43984	UPSTREAM	169	A	T	T	0.1026	4	35	-2.806	1.145e-08	-
1-palmitoyl-GPE (16:0)	35631	2R_17652969_SNP	FBgn0264714	CG43982	DOWNSTREAM	769	A	T	T	0.1026	4	35	-2.806	1.145e-08	-
1-stearoyl-GPI (18:0)	19324	2R_3423441_SNP	FBgn0033190	CG2137	UTR_5_PRIME	0	T	C	C	0.1026	4	35	-0.5452	6.1722e-10	-
1-stearoyl-GPI (18:0)	19324	2R_3423441_SNP	FBgn0264294	Cyt-b5	UTR_3_PRIME	0	T	C	C	0.1026	4	35	-0.5452	6.1722e-10	-
1-stearoyl-GPI (18:0)	19324	2R_20194885_SNP	FBgn0003888	betaTub60D	INTRON	0	A	G	G	0.125	5	35	-0.4716	1.11596e-08	(regulatory_region|REDfly_CRMs|FBsf0000435601)
1-stearoyl-GPI (18:0)	19324	2R_20176958_SNP	FBgn0005636	nvy	INTRON	0	C	T	C	0.1143	4	31	-0.5177	1.57219e-08	(TF_binding_site|mE1_TFBS_cad|FBsf0000247439);(TF_binding_site|mE1_TFBS_chinmo|FBsf0000212025)
1-stearoyl-GPI (18:0)	19324	3L_855698_SNP	FBgn0035170	dpr20	INTRON	0	C	T	T	0.1351	5	32	-0.4697	2.09929e-08	-
2-aminooctanoate	43343	X_7923039_SNP	Intergenic	Intergenic	Intergenic		A	G	G	0.1081	4	33	-0.5997	1.99128e-09	-
2-aminooctanoate	43343	3L_713275_SNP	FBgn0266960	CR45411	DOWNSTREAM	941	T	C	C	0.1026	4	35	-0.5981	2.18199e-09	(TF_binding_site|mE1_TFBS_sens|FBsf0000222268)
2-aminooctanoate	43343	3L_6898075_SNP	Intergenic	Intergenic	Intergenic		T	A	A	0.1026	4	35	-0.593	3.68257e-09	(TF_binding_site|BDTNP1_TFBS_da|FBsf0000326279);(TF_binding_site|BDTNP1_TFBS_dl|FBsf0000305991);(TF_binding_site|BDTNP1_TFBS_Med|FBsf0000282362);(TF_binding_site|BDTNP1_TFBS_twi|FBsf0000203121);(TF_binding_site|mE1_TFBS_Trl|FBsf0000339591)
2'-deoxyuridine	1412	2L_2286081_SNP	FBgn0051681	CG31681	NON_SYNONYMOUS_CODING	0	C	T	T	0.1053	4	34	-0.87	7.89687e-09	-
2'-deoxyuridine	1412	2L_2286081_SNP	FBgn0031409	CG4271	DOWNSTREAM	155	C	T	T	0.1053	4	34	-0.87	7.89687e-09	-
2'-deoxyuridine	1412	2L_2286081_SNP	FBgn0261523	CG42658	DOWNSTREAM	944	C	T	T	0.1053	4	34	-0.87	7.89687e-09	-
2'-deoxyuridine	1412	2L_2286085_SNP	FBgn0051681	CG31681	NON_SYNONYMOUS_CODING	0	G	T	T	0.1	4	36	-0.8489	2.50599e-08	-
2'-deoxyuridine	1412	2L_2286085_SNP	FBgn0031409	CG4271	DOWNSTREAM	159	G	T	T	0.1	4	36	-0.8489	2.50599e-08	-
2'-deoxyuridine	1412	2L_2286085_SNP	FBgn0261523	CG42658	DOWNSTREAM	940	G	T	T	0.1	4	36	-0.8489	2.50599e-08	-
2'-deoxyuridine	1412	2L_2286104_SNP	FBgn0051681	CG31681	NON_SYNONYMOUS_CODING	0	C	G	G	0.1	4	36	-0.8489	2.50599e-08	-
2'-deoxyuridine	1412	2L_2286104_SNP	FBgn0031409	CG4271	DOWNSTREAM	178	C	G	G	0.1	4	36	-0.8489	2.50599e-08	-
2'-deoxyuridine	1412	2L_2286104_SNP	FBgn0261523	CG42658	DOWNSTREAM	921	C	G	G	0.1	4	36	-0.8489	2.50599e-08	-
2'-deoxyuridine	1412	2L_2286527_SNP	FBgn0051681	CG31681	SYNONYMOUS_CODING	0	A	G	G	0.1	4	36	-0.8489	2.50599e-08	-
2'-deoxyuridine	1412	2L_2286527_SNP	FBgn0261523	CG42658	DOWNSTREAM	498	A	G	G	0.1	4	36	-0.8489	2.50599e-08	-
2'-deoxyuridine	1412	2L_2286527_SNP	FBgn0031409	CG4271	DOWNSTREAM	601	A	G	G	0.1	4	36	-0.8489	2.50599e-08	-
2-hydroxy-3-methylvalerate	36746	2L_1315109_SNP	Intergenic	Intergenic	Intergenic		T	G	G	0.1053	4	34	-2.594	4.7658e-12	(TF_binding_site|BDTNP1_TFBS_twi|FBsf0000200559)
2-hydroxy-3-methylvalerate	36746	2R_14721107_INS	FBgn0034398	CG15098	UTR_3_PRIME	0	A	AA	A	0.1176	4	30	-2.469	4.9881e-10	-
2-hydroxy-3-methylvalerate	36746	2R_14721107_INS	FBgn0034397	CG15082	DOWNSTREAM	362	A	AA	A	0.1176	4	30	-2.469	4.9881e-10	-
2-hydroxy-3-methylvalerate	36746	2L_7359146_SNP	Intergenic	Intergenic	Intergenic		A	G	G	0.1081	4	33	-2.427	1.10018e-09	(TF_binding_site|mE1_TFBS_HSA|FBsf0000346408);(TF_binding_site|mE1_TFBS_sens|FBsf0000216612)
2-hydroxy-3-methylvalerate	36746	3R_13643247_SNP	FBgn0261649	tinc	INTRON	0	C	T	T	0.1111	4	32	-2.326	1.43742e-08	-
2-methylserine	53229	3L_6455540_SNP	FBgn0261801	CG42747	INTRON	0	T	A	A	0.1081	4	33	-3.723	3.5991e-12	(TF_binding_site|BDTNP1_TFBS_da|FBsf0000326237);(TF_binding_site|BDTNP1_TFBS_twi|FBsf0000203081)
2-methylserine	53229	2L_19157630_SNP	FBgn0010300	brat	INTRON	0	A	T	T	0.1143	4	31	-3.72	3.8345e-12	(TF_binding_site|BDTNP1_TFBS_da|FBsf0000322887);(TF_binding_site|BDTNP1_TFBS_dl|FBsf0000299369);(TF_binding_site|BDTNP1_TFBS_gt|FBsf0000293300);(TF_binding_site|BDTNP1_TFBS_hb|FBsf0000290919);(TF_binding_site|BDTNP1_TFBS_Med|FBsf0000278951);(TF_binding_site|BDTNP1_TFBS_twi|FBsf0000202123);(TF_binding_site|BDTNP1_TFBS_z|FBsf0000196264);(TF_binding_site|mE1_TFBS_cad|FBsf0000242397);(TF_binding_site…
2-methylserine	53229	2L_19157630_SNP	FBgn0266312	CR44977	DOWNSTREAM	238	A	T	T	0.1143	4	31	-3.72	3.8345e-12	(TF_binding_site|BDTNP1_TFBS_da|FBsf0000322887);(TF_binding_site|BDTNP1_TFBS_dl|FBsf0000299369);(TF_binding_site|BDTNP1_TFBS_gt|FBsf0000293300);(TF_binding_site|BDTNP1_TFBS_hb|FBsf0000290919);(TF_binding_site|BDTNP1_TFBS_Med|FBsf0000278951);(TF_binding_site|BDTNP1_TFBS_twi|FBsf0000202123);(TF_binding_site|BDTNP1_TFBS_z|FBsf0000196264);(TF_binding_site|mE1_TFBS_cad|FBsf0000242397);(TF_binding_site…
2-methylserine	53229	2L_18387490_INS	FBgn0000636	Fas3	DOWNSTREAM	388	AA	A	A	0.1111	4	32	-3.585	1.4299e-10	-
2-methylserine	53229	2L_19404005_SNP	FBgn0041789	Pax	SYNONYMOUS_CODING	0	A	G	G	0.1	4	36	-3.551	1.6019e-10	(TF_binding_site|mE1_TFBS_cad|FBsf0000242419);(TF_binding_site|mE1_TFBS_chinmo|FBsf0000207838);(TF_binding_site|mE1_TFBS_HSA|FBsf0000352496)
2-methylserine	53229	2L_19404005_SNP	FBgn0065096	snmRNA:359	UPSTREAM	437	A	G	G	0.1	4	36	-3.551	1.6019e-10	(TF_binding_site|mE1_TFBS_cad|FBsf0000242419);(TF_binding_site|mE1_TFBS_chinmo|FBsf0000207838);(TF_binding_site|mE1_TFBS_HSA|FBsf0000352496)
2-methylserine	53229	2L_3982276_SNP	FBgn0051774	fred	INTRON	0	A	G	G	0.1	4	36	-3.551	1.6019e-10	-
2-methylserine	53229	3L_2120721_SNP	FBgn0052311	zormin	INTRON	0	A	G	G	0.1	4	36	-3.551	1.6019e-10	-
2-methylserine	53229	X_12382217_SNP	FBgn0030394	Cpr11A	INTRON	0	C	T	T	0.1081	4	33	-3.564	1.7204e-10	-
2-methylserine	53229	2L_6744421_SNP	FBgn0031855	CG11221	INTRON	0	C	G	G	0.1	4	36	-3.497	4.2764e-10	-
2-methylserine	53229	2L_6744421_SNP	FBgn0051910	CG31910	DOWNSTREAM	242	C	G	G	0.1	4	36	-3.497	4.2764e-10	-
2-methylserine	53229	2L_6744421_SNP	FBgn0086034	snoRNA:Me28S-G2743	UPSTREAM	579	C	G	G	0.1	4	36	-3.497	4.2764e-10	-
2-methylserine	53229	2L_5904232_SNP	FBgn0031747	CG9021	SYNONYMOUS_CODING	0	T	C	C	0.1026	4	35	-3.48	6.6822e-10	(TF_binding_site|mE1_TFBS_HSA|FBsf0000345828)
2-methylserine	53229	2L_5904232_SNP	FBgn0264352	CR43808	DOWNSTREAM	726	T	C	C	0.1026	4	35	-3.48	6.6822e-10	(TF_binding_site|mE1_TFBS_HSA|FBsf0000345828)
2-methylserine	53229	2L_5904241_SNP	FBgn0031747	CG9021	SYNONYMOUS_CODING	0	C	G	G	0.1026	4	35	-3.48	6.6822e-10	(TF_binding_site|mE1_TFBS_HSA|FBsf0000345828)
2-methylserine	53229	2L_5904241_SNP	FBgn0264352	CR43808	DOWNSTREAM	717	C	G	G	0.1026	4	35	-3.48	6.6822e-10	(TF_binding_site|mE1_TFBS_HSA|FBsf0000345828)
2-methylserine	53229	3R_12672371_SNP	FBgn0264857	iab-8	INTRON	0	C	A	A	0.1143	4	31	-3.496	7.5821e-10	(TF_binding_site|BDTNP1_TFBS_da|FBsf0000329586);(TF_binding_site|BDTNP1_TFBS_dl|FBsf0000312275);(TF_binding_site|BDTNP1_TFBS_twi|FBsf0000265251);(TF_binding_site|BDTNP1_TFBS_z|FBsf0000197689);(TF_binding_site|mE1_TFBS_cad|FBsf0000248577);(TF_binding_site|mE1_TFBS_HSA|FBsf0000372404);(TF_binding_site|mE1_TFBS_inv|FBsf0000237275)
2-methylserine	53229	3R_12672384_SNP	FBgn0264857	iab-8	INTRON	0	T	A	A	0.1111	4	32	-3.499	1.05176e-09	(TF_binding_site|BDTNP1_TFBS_da|FBsf0000329586);(TF_binding_site|BDTNP1_TFBS_dl|FBsf0000312275);(TF_binding_site|BDTNP1_TFBS_twi|FBsf0000265251);(TF_binding_site|BDTNP1_TFBS_z|FBsf0000197689);(TF_binding_site|mE1_TFBS_cad|FBsf0000248577);(TF_binding_site|mE1_TFBS_HSA|FBsf0000372404);(TF_binding_site|mE1_TFBS_inv|FBsf0000237275)
2-methylserine	53229	2L_19366796_SNP	Intergenic	Intergenic	Intergenic		C	A	A	0.1081	4	33	-3.48	1.15732e-09	-
2-methylserine	53229	3R_10310111_SNP	Intergenic	Intergenic	Intergenic		T	A	A	0.1	4	36	-3.452	1.24949e-09	(silencer|mE1_HDAC_PRE|FBsf0000343652);(TF_binding_site|BDTNP1_TFBS_da|FBsf0000329209);(TF_binding_site|BDTNP1_TFBS_dl|FBsf0000311684);(TF_binding_site|BDTNP1_TFBS_gt|FBsf0000294407);(TF_binding_site|BDTNP1_TFBS_Med|FBsf0000285304);(TF_binding_site|BDTNP1_TFBS_slp1|FBsf0000273010);(TF_binding_site|BDTNP1_TFBS_sna|FBsf0000270996);(TF_binding_site|BDTNP1_TFBS_twi|FBsf0000264985);(TF_binding_site|mE…
2-methylserine	53229	3R_10310240_INS	Intergenic	Intergenic	Intergenic		GATTCGG	G	G	0.1	4	36	-3.452	1.24949e-09	(silencer|mE1_HDAC_PRE|FBsf0000343652);(TF_binding_site|BDTNP1_TFBS_da|FBsf0000329209);(TF_binding_site|BDTNP1_TFBS_dl|FBsf0000311684);(TF_binding_site|BDTNP1_TFBS_gt|FBsf0000294407);(TF_binding_site|BDTNP1_TFBS_Med|FBsf0000285304);(TF_binding_site|BDTNP1_TFBS_slp1|FBsf0000273010);(TF_binding_site|BDTNP1_TFBS_sna|FBsf0000270996);(TF_binding_site|BDTNP1_TFBS_twi|FBsf0000264985);(TF_binding_site|mE…
2-methylserine	53229	3R_10310244_SNP	Intergenic	Intergenic	Intergenic		T	C	C	0.1	4	36	-3.452	1.24949e-09	(silencer|mE1_HDAC_PRE|FBsf0000343652);(TF_binding_site|BDTNP1_TFBS_da|FBsf0000329209);(TF_binding_site|BDTNP1_TFBS_dl|FBsf0000311684);(TF_binding_site|BDTNP1_TFBS_gt|FBsf0000294407);(TF_binding_site|BDTNP1_TFBS_Med|FBsf0000285304);(TF_binding_site|BDTNP1_TFBS_slp1|FBsf0000273010);(TF_binding_site|BDTNP1_TFBS_sna|FBsf0000270996);(TF_binding_site|BDTNP1_TFBS_twi|FBsf0000264985);(TF_binding_site|mE…
2-methylserine	53229	2L_8790425_SNP	Intergenic	Intergenic	Intergenic		A	G	G	0.1026	4	35	-3.449	1.35316e-09	-
2-methylserine	53229	2L_11200104_SNP	FBgn0259822	Ca-beta	INTRON	0	C	T	C	0.1	4	36	-3.436	1.51282e-09	-
2-methylserine	53229	3L_15472821_SNP	Intergenic	Intergenic	Intergenic		C	G	C	0.1	4	36	-3.436	1.51282e-09	-
2-methylserine	53229	X_14755447_SNP	FBgn0264078	Flo2	INTRON	0	T	G	G	0.1	4	36	-3.436	1.51282e-09	-
2-methylserine	53229	2L_9119855_SNP	FBgn0265828	CR44617	EXON	0	C	G	G	0.1026	4	35	-3.435	1.67712e-09	-
2-methylserine	53229	3L_19175052_SNP	FBgn0016797	fz2	INTRON	0	G	C	C	0.1026	4	35	-3.424	2.07118e-09	(TF_binding_site|mE1_TFBS_cad|FBsf0000245378);(TF_binding_site|mE1_TFBS_disco|FBsf0000260464)
2-methylserine	53229	3L_4090333_SNP	FBgn0035495	CG14989	NON_SYNONYMOUS_CODING	0	A	G	G	0.1282	5	34	-3.098	2.65263e-09	(TF_binding_site|mE1_TFBS_cad|FBsf0000244192)
2-methylserine	53229	X_10817043_SNP	FBgn0264502	CG43901	UTR_3_PRIME	0	G	A	A	0.1212	4	29	-3.443	2.68158e-09	(TF_binding_site|mE1_TFBS_HSA|FBsf0000381366)
2-methylserine	53229	X_10817043_SNP	FBgn0003965	v	UPSTREAM	962	G	A	A	0.1212	4	29	-3.443	2.68158e-09	(TF_binding_site|mE1_TFBS_HSA|FBsf0000381366)
2-methylserine	53229	X_1209129_SNP	FBgn0025641	DAAM	INTRON	0	C	T	T	0.1	4	36	-3.387	3.55598e-09	(TF_binding_site|mE1_TFBS_chinmo|FBsf0000208008)
2-methylserine	53229	3L_5785371_SNP	FBgn0086694	Bre1	SYNONYMOUS_CODING	0	C	G	G	0.1081	4	33	-3.38	4.81086e-09	(TF_binding_site|mE1_TFBS_cad|FBsf0000244292);(TF_binding_site|mE1_TFBS_HSA|FBsf0000362462);(TF_binding_site|mE1_TFBS_sens|FBsf0000223108)
2-methylserine	53229	2L_18372802_SNP	FBgn0000636	Fas3	INTRON	0	G	T	T	0.1	4	36	-3.344	5.07998e-09	-
2-methylserine	53229	3L_6455555_SNP	FBgn0261801	CG42747	INTRON	0	T	C	C	0.125	5	35	-3.063	5.39975e-09	(TF_binding_site|BDTNP1_TFBS_da|FBsf0000326237);(TF_binding_site|BDTNP1_TFBS_twi|FBsf0000203081)
2-methylserine	53229	2L_19238833_SNP	Intergenic	Intergenic	Intergenic		G	A	A	0.1053	4	34	-3.389	5.637e-09	-
2-methylserine	53229	2L_19238840_SNP	Intergenic	Intergenic	Intergenic		T	A	A	0.1053	4	34	-3.389	5.637e-09	-
2-methylserine	53229	3R_26169890_INS	FBgn0010113	hdc	INTRON	0	TCT	T	T	0.1351	5	32	-3.07	5.86763e-09	(TF_binding_site|BDTNP1_TFBS_dl|FBsf0000314799);(TF_binding_site|BDTNP1_TFBS_twi|FBsf0000266433)
2-methylserine	53229	3L_6455413_SNP	FBgn0261801	CG42747	INTRON	0	T	A	A	0.1282	5	34	-3.067	5.89552e-09	(TF_binding_site|BDTNP1_TFBS_da|FBsf0000326237);(TF_binding_site|BDTNP1_TFBS_dl|FBsf0000305919);(TF_binding_site|BDTNP1_TFBS_twi|FBsf0000203081)
2-methylserine	53229	3L_6455517_SNP	FBgn0261801	CG42747	INTRON	0	T	C	C	0.1282	5	34	-3.067	5.89552e-09	(TF_binding_site|BDTNP1_TFBS_da|FBsf0000326237);(TF_binding_site|BDTNP1_TFBS_twi|FBsf0000203081)
2-methylserine	53229	3L_6455561_INS	FBgn0261801	CG42747	INTRON	0	CT	C	C	0.1282	5	34	-3.067	5.89552e-09	(TF_binding_site|BDTNP1_TFBS_da|FBsf0000326237);(TF_binding_site|BDTNP1_TFBS_twi|FBsf0000203081)
2-methylserine	53229	3R_26089160_SNP	Intergenic	Intergenic	Intergenic		T	C	C	0.1026	4	35	-3.368	6.24875e-09	(TF_binding_site|BDTNP1_TFBS_dl|FBsf0000314774)
2-methylserine	53229	2L_4053576_SNP	FBgn0000547	ed	INTRON	0	C	A	A	0.1	4	36	-3.324	6.8891e-09	(TF_binding_site|BDTNP1_TFBS_da|FBsf0000321353);(TF_binding_site|BDTNP1_TFBS_dl|FBsf0000296547);(TF_binding_site|BDTNP1_TFBS_hb|FBsf0000290554);(TF_binding_site|BDTNP1_TFBS_Med|FBsf0000277484);(TF_binding_site|BDTNP1_TFBS_twi|FBsf0000200781);(TF_binding_site|mE1_TFBS_HSA|FBsf0000345166)
2-methylserine	53229	X_7512426_SNP	FBgn0004198	ct	INTRON	0	A	G	G	0.1026	4	35	-3.341	6.89837e-09	-
2-methylserine	53229	X_7512440_SNP	FBgn0004198	ct	INTRON	0	A	T	T	0.1026	4	35	-3.341	6.89837e-09	-
2-methylserine	53229	X_7512499_SNP	FBgn0004198	ct	INTRON	0	A	T	T	0.1026	4	35	-3.341	6.89837e-09	-
2-methylserine	53229	X_659331_INS	FBgn0266281	CR44966	EXON	0	AA	A	A	0.1111	4	32	-3.383	7.40896e-09	(TF_binding_site|BDTNP1_TFBS_da|FBsf0000331223);(TF_binding_site|BDTNP1_TFBS_dl|FBsf0000315581);(TF_binding_site|BDTNP1_TFBS_hb|FBsf0000291685);(TF_binding_site|BDTNP1_TFBS_twi|FBsf0000204717);(TF_binding_site|mE1_TFBS_bab1|FBsf0000214898);(TF_binding_site|mE1_TFBS_cad|FBsf0000242629);(TF_binding_site|mE1_TFBS_D|FBsf0000238333);(TF_binding_site|mE1_TFBS_disco|FBsf0000261181);(TF_binding_site|mE1_…
2-methylserine	53229	X_659331_INS	FBgn0015288	RpL22	UPSTREAM	169	AA	A	A	0.1111	4	32	-3.383	7.40896e-09	(TF_binding_site|BDTNP1_TFBS_da|FBsf0000331223);(TF_binding_site|BDTNP1_TFBS_dl|FBsf0000315581);(TF_binding_site|BDTNP1_TFBS_hb|FBsf0000291685);(TF_binding_site|BDTNP1_TFBS_twi|FBsf0000204717);(TF_binding_site|mE1_TFBS_bab1|FBsf0000214898);(TF_binding_site|mE1_TFBS_cad|FBsf0000242629);(TF_binding_site|mE1_TFBS_D|FBsf0000238333);(TF_binding_site|mE1_TFBS_disco|FBsf0000261181);(TF_binding_site|mE1_…
2-methylserine	53229	3L_4997378_SNP	FBgn0005775	Con	INTRON	0	G	T	T	0.1	4	36	-3.354	7.58588e-09	-
2-methylserine	53229	3L_4997378_SNP	FBgn0052232	CG32232	UPSTREAM	501	G	T	T	0.1	4	36	-3.354	7.58588e-09	-
2-methylserine	53229	X_18922953_SNP	FBgn0264090	CG43759	DOWNSTREAM	291	G	A	A	0.1026	4	35	-3.335	8.97471e-09	-
2-methylserine	53229	X_4091448_SNP	FBgn0000635	Fas2	INTRON	0	G	A	A	0.1316	5	33	-3.019	9.06977e-09	-
2-methylserine	53229	2L_13515559_SNP	FBgn0023407	B4	INTRON	0	A	G	G	0.1	4	36	-3.344	9.36591e-09	(TF_binding_site|BDTNP1_TFBS_da|FBsf0000322336);(TF_binding_site|BDTNP1_TFBS_dl|FBsf0000298495);(TF_binding_site|BDTNP1_TFBS_twi|FBsf0000201626);(TF_binding_site|mE1_TFBS_cnc|FBsf0000206256);(TF_binding_site|mE1_TFBS_HSA|FBsf0000350838)
2-methylserine	53229	2L_13515560_SNP	FBgn0023407	B4	INTRON	0	A	G	G	0.1	4	36	-3.344	9.36591e-09	(TF_binding_site|BDTNP1_TFBS_da|FBsf0000322336);(TF_binding_site|BDTNP1_TFBS_dl|FBsf0000298495);(TF_binding_site|BDTNP1_TFBS_twi|FBsf0000201626);(TF_binding_site|mE1_TFBS_cnc|FBsf0000206256);(TF_binding_site|mE1_TFBS_HSA|FBsf0000350838)
2-methylserine	53229	2L_6239511_SNP	Intergenic	Intergenic	Intergenic		A	G	G	0.1026	4	35	-3.343	9.55872e-09	(TF_binding_site|BDTNP1_TFBS_da|FBsf0000321636)
2-methylserine	53229	3R_10029501_SNP	FBgn0011582	Dop1R1	INTRON	0	G	A	A	0.1	4	36	-3.314	9.59478e-09	-
2-methylserine	53229	3R_10029523_SNP	FBgn0011582	Dop1R1	INTRON	0	C	T	T	0.1	4	36	-3.314	9.59478e-09	-
2-methylserine	53229	2L_323939_SNP	FBgn0004611	Plc21C	INTRON	0	T	G	G	0.1026	4	35	-3.331	9.61261e-09	-
2-methylserine	53229	2L_323939_SNP	FBgn0053127	CG33127	DOWNSTREAM	848	T	G	G	0.1026	4	35	-3.331	9.61261e-09	-
2-methylserine	53229	3R_1185637_SNP	FBgn0037315	Cerk	INTRON	0	C	G	C	0.1	4	36	-3.316	9.7361e-09	(TF_binding_site|mE1_TFBS_cad|FBsf0000247634)
2-methylserine	53229	X_18813717_SNP	Intergenic	Intergenic	Intergenic		A	G	G	0.1053	4	34	-3.349	9.86685e-09	-
2-methylserine	53229	3R_13780502_INS	FBgn0263995	cpo	INTRON	0	TCGGTTTGCCAGCA	T	T	0.1026	4	35	-3.314	1.07437e-08	(TF_binding_site|mE1_TFBS_cad|FBsf0000248652);(TF_binding_site|mE1_TFBS_HSA|FBsf0000372739);(TF_binding_site|mE1_TFBS_sens|FBsf0000232313)
2-methylserine	53229	2L_19235914_SNP	Intergenic	Intergenic	Intergenic		T	C	C	0.1053	4	34	-3.32	1.11505e-08	(TF_binding_site|mE1_TFBS_HSA|FBsf0000352447);(TF_binding_site|mE1_TFBS_sens|FBsf0000218292)
2-methylserine	53229	3R_16666522_SNP	FBgn0053094	Synd	DOWNSTREAM	682	A	T	T	0.1026	4	35	-3.316	1.17951e-08	-
2-methylserine	53229	X_624038_SNP	FBgn0021764	sdk	INTRON	0	A	G	G	0.1026	4	35	-3.338	1.21883e-08	-
2-methylserine	53229	X_633653_SNP	FBgn0021764	sdk	INTRON	0	A	G	G	0.1026	4	35	-3.338	1.21883e-08	-
2-methylserine	53229	X_634075_SNP	FBgn0021764	sdk	INTRON	0	T	C	C	0.1026	4	35	-3.338	1.21883e-08	-
2-methylserine	53229	X_720373_SNP	FBgn0264449	CG43867	INTRON	0	T	C	C	0.1026	4	35	-3.338	1.21883e-08	(TF_binding_site|mE1_TFBS_h|FBsf0000257704);(TF_binding_site|mE1_TFBS_HSA|FBsf0000377894);(TF_binding_site|mE1_TFBS_sens|FBsf0000218927)
2-methylserine	53229	X_751306_SNP	FBgn0264449	CG43867	INTRON	0	C	T	T	0.1026	4	35	-3.338	1.21883e-08	(TF_binding_site|mE1_TFBS_chinmo|FBsf0000207961)
2-methylserine	53229	3R_5122404_SNP	FBgn0037676	CG8861	INTRON	0	A	G	G	0.1026	4	35	-3.316	1.22189e-08	-
2-methylserine	53229	2L_8451975_SNP	FBgn0026718	fu12	INTRON	0	C	A	A	0.1212	4	29	-3.378	1.28252e-08	-
2-methylserine	53229	X_633958_SNP	FBgn0021764	sdk	INTRON	0	C	G	G	0.1026	4	35	-3.333	1.3093e-08	-
2-methylserine	53229	3R_16666613_SNP	FBgn0053094	Synd	DOWNSTREAM	773	T	C	C	0.1053	4	34	-3.313	1.34674e-08	-
2-methylserine	53229	X_617230_INS	FBgn0021764	sdk	INTRON	0	CGC	C	C	0.1	4	36	-3.323	1.41183e-08	-
2-methylserine	53229	X_624388_SNP	FBgn0021764	sdk	NON_SYNONYMOUS_CODING	0	A	G	G	0.1	4	36	-3.323	1.41183e-08	(TF_binding_site|mE1_TFBS_cad|FBsf0000242626)
2-methylserine	53229	X_626694_SNP	FBgn0021764	sdk	INTRON	0	A	G	G	0.1	4	36	-3.323	1.41183e-08	-
2-methylserine	53229	X_627144_SNP	FBgn0021764	sdk	INTRON	0	A	T	T	0.1	4	36	-3.323	1.41183e-08	-
2-methylserine	53229	X_627145_SNP	FBgn0021764	sdk	INTRON	0	T	A	A	0.1	4	36	-3.323	1.41183e-08	-
2-methylserine	53229	X_627184_SNP	FBgn0021764	sdk	INTRON	0	G	A	A	0.1	4	36	-3.323	1.41183e-08	-
2-methylserine	53229	X_631337_SNP	FBgn0021764	sdk	INTRON	0	G	T	T	0.1	4	36	-3.323	1.41183e-08	-
2-methylserine	53229	X_631338_SNP	FBgn0021764	sdk	INTRON	0	T	C	C	0.1	4	36	-3.323	1.41183e-08	-
2-methylserine	53229	X_631506_SNP	FBgn0021764	sdk	INTRON	0	A	G	G	0.1	4	36	-3.323	1.41183e-08	-
2-methylserine	53229	X_640905_SNP	FBgn0021764	sdk	INTRON	0	G	A	G	0.1	4	36	-3.323	1.41183e-08	-
2-methylserine	53229	X_653912_SNP	FBgn0040382	CG5273	SYNONYMOUS_CODING	0	T	C	C	0.1	4	36	-3.323	1.41183e-08	(TF_binding_site|BDTNP1_TFBS_da|FBsf0000331220);(TF_binding_site|BDTNP1_TFBS_dl|FBsf0000315578);(TF_binding_site|BDTNP1_TFBS_Med|FBsf0000287343);(TF_binding_site|mE1_TFBS_bab1|FBsf0000214897);(TF_binding_site|mE1_TFBS_cad|FBsf0000242627);(TF_binding_site|mE1_TFBS_chinmo|FBsf0000207952);(TF_binding_site|mE1_TFBS_HSA|FBsf0000377862);(TF_binding_site|mE1_TFBS_inv|FBsf0000235169);(TF_binding_site|mE1…
2-methylserine	53229	X_660375_SNP	FBgn0266281	CR44966	DOWNSTREAM	242	C	T	T	0.1	4	36	-3.323	1.41183e-08	(TF_binding_site|BDTNP1_TFBS_da|FBsf0000331224);(TF_binding_site|BDTNP1_TFBS_dl|FBsf0000315582);(TF_binding_site|BDTNP1_TFBS_Med|FBsf0000287347);(TF_binding_site|BDTNP1_TFBS_twi|FBsf0000204717);(TF_binding_site|mE1_TFBS_sens|FBsf0000218902)
2-methylserine	53229	X_661886_SNP	Intergenic	Intergenic	Intergenic		C	T	T	0.1	4	36	-3.323	1.41183e-08	-
2-methylserine	53229	X_664435_SNP	FBgn0027343	fz3	SYNONYMOUS_CODING	0	A	G	G	0.1	4	36	-3.323	1.41183e-08	(TF_binding_site|BDTNP1_TFBS_dl|FBsf0000315585);(TF_binding_site|BDTNP1_TFBS_Med|FBsf0000287348);(TF_binding_site|mE1_TFBS_HSA|FBsf0000377866);(TF_binding_site|mE1_TFBS_sens|FBsf0000218903)
2-methylserine	53229	X_665080_SNP	FBgn0027343	fz3	INTRON	0	A	G	G	0.1	4	36	-3.323	1.41183e-08	(TF_binding_site|BDTNP1_TFBS_dl|FBsf0000315585);(TF_binding_site|BDTNP1_TFBS_Med|FBsf0000287349);(TF_binding_site|BDTNP1_TFBS_prd|FBsf0000275851);(TF_binding_site|mE1_TFBS_HSA|FBsf0000377867)
2-methylserine	53229	X_665221_SNP	FBgn0027343	fz3	INTRON	0	G	T	T	0.1	4	36	-3.323	1.41183e-08	(TF_binding_site|BDTNP1_TFBS_da|FBsf0000331225);(TF_binding_site|BDTNP1_TFBS_dl|FBsf0000315586);(TF_binding_site|BDTNP1_TFBS_Med|FBsf0000287349);(TF_binding_site|BDTNP1_TFBS_prd|FBsf0000275851);(TF_binding_site|mE1_TFBS_HSA|FBsf0000377867)
2-methylserine	53229	X_668032_DEL	FBgn0027343	fz3	INTRON	0	C	CCAC	CCAC	0.1	4	36	-3.323	1.41183e-08	(TF_binding_site|BDTNP1_TFBS_dl|FBsf0000315588);(TF_binding_site|BDTNP1_TFBS_Med|FBsf0000287351);(TF_binding_site|mE1_TFBS_cad|FBsf0000242630);(TF_binding_site|mE1_TFBS_HSA|FBsf0000377868);(TF_binding_site|mE1_TFBS_sens|FBsf0000218905)
2-methylserine	53229	X_668704_SNP	FBgn0027343	fz3	INTRON	0	C	A	A	0.1	4	36	-3.323	1.41183e-08	(TF_binding_site|BDTNP1_TFBS_dl|FBsf0000315589);(TF_binding_site|BDTNP1_TFBS_Med|FBsf0000287351);(TF_binding_site|mE1_TFBS_HSA|FBsf0000377868);(TF_binding_site|mE1_TFBS_sens|FBsf0000218905)
2-methylserine	53229	X_672687_SNP	FBgn0027343	fz3	INTRON	0	G	T	T	0.1	4	36	-3.323	1.41183e-08	(TF_binding_site|BDTNP1_TFBS_dl|FBsf0000315590);(TF_binding_site|BDTNP1_TFBS_prd|FBsf0000275852);(TF_binding_site|mE1_TFBS_HSA|FBsf0000377870)
2-methylserine	53229	X_679630_SNP	FBgn0086368	tw	SYNONYMOUS_CODING	0	G	C	C	0.1	4	36	-3.323	1.41183e-08	(TF_binding_site|mE1_TFBS_sens|FBsf0000218908)
2-methylserine	53229	X_680887_SNP	FBgn0086368	tw	INTRON	0	T	G	G	0.1	4	36	-3.323	1.41183e-08	-
2-methylserine	53229	X_681410_SNP	FBgn0086368	tw	NON_SYNONYMOUS_CODING	0	A	G	G	0.1	4	36	-3.323	1.41183e-08	-
2-methylserine	53229	X_681410_SNP	FBgn0025620	CG13360	DOWNSTREAM	478	A	G	G	0.1	4	36	-3.323	1.41183e-08	-
2-methylserine	53229	X_684780_SNP	FBgn0265662	CR44469	UPSTREAM	181	A	G	G	0.1	4	36	-3.323	1.41183e-08	-
2-methylserine	53229	X_684780_SNP	FBgn0025620	CG13360	UPSTREAM	658	A	G	G	0.1	4	36	-3.323	1.41183e-08	-
2-methylserine	53229	X_685049_SNP	FBgn0265662	CR44469	UPSTREAM	450	T	A	A	0.1	4	36	-3.323	1.41183e-08	(TF_binding_site|mE1_TFBS_sens|FBsf0000218910)
2-methylserine	53229	X_685049_SNP	FBgn0025620	CG13360	UPSTREAM	927	T	A	A	0.1	4	36	-3.323	1.41183e-08	(TF_binding_site|mE1_TFBS_sens|FBsf0000218910)
2-methylserine	53229	X_686124_SNP	Intergenic	Intergenic	Intergenic		A	T	T	0.1	4	36	-3.323	1.41183e-08	(TF_binding_site|mE1_TFBS_sens|FBsf0000218910)
2-methylserine	53229	X_688382_SNP	FBgn0025621	CG16989	SYNONYMOUS_CODING	0	A	G	G	0.1	4	36	-3.323	1.41183e-08	(TF_binding_site|BDTNP1_TFBS_da|FBsf0000331229);(TF_binding_site|mE1_TFBS_chinmo|FBsf0000207955);(TF_binding_site|mE1_TFBS_HSA|FBsf0000377877)
2-methylserine	53229	X_700850_SNP	FBgn0260855	Sec22	INTRON	0	C	G	G	0.1	4	36	-3.323	1.41183e-08	(TF_binding_site|BDTNP1_TFBS_dl|FBsf0000315604);(TF_binding_site|BDTNP1_TFBS_Med|FBsf0000287358);(TF_binding_site|mE1_TFBS_HSA|FBsf0000377885);(TF_binding_site|mE1_TFBS_sens|FBsf0000218919)
2-methylserine	53229	X_704397_SNP	FBgn0264449	CG43867	SYNONYMOUS_CODING	0	A	G	G	0.1	4	36	-3.323	1.41183e-08	(TF_binding_site|mE1_TFBS_sens|FBsf0000218920)
2-methylserine	53229	X_704490_SNP	FBgn0264449	CG43867	NON_SYNONYMOUS_CODING	0	A	C	C	0.1	4	36	-3.323	1.41183e-08	(TF_binding_site|mE1_TFBS_HSA|FBsf0000377887);(TF_binding_site|mE1_TFBS_sens|FBsf0000218920)
2-methylserine	53229	X_704520_SNP	FBgn0264449	CG43867	SYNONYMOUS_CODING	0	T	C	C	0.1	4	36	-3.323	1.41183e-08	(TF_binding_site|mE1_TFBS_HSA|FBsf0000377887);(TF_binding_site|mE1_TFBS_sens|FBsf0000218920)
2-methylserine	53229	X_705455_SNP	FBgn0264449	CG43867	INTRON	0	T	C	C	0.1	4	36	-3.323	1.41183e-08	(TF_binding_site|mE1_TFBS_HSA|FBsf0000377888);(TF_binding_site|mE1_TFBS_sens|FBsf0000218921)
2-methylserine	53229	X_713014_SNP	FBgn0264449	CG43867	SYNONYMOUS_CODING	0	T	C	C	0.1	4	36	-3.323	1.41183e-08	-
2-methylserine	53229	X_714737_SNP	FBgn0264449	CG43867	NON_SYNONYMOUS_CODING	0	C	A	A	0.1	4	36	-3.323	1.41183e-08	(TF_binding_site|mE1_TFBS_chinmo|FBsf0000207958)
2-methylserine	53229	X_716587_SNP	FBgn0264449	CG43867	INTRON	0	A	T	T	0.1	4	36	-3.323	1.41183e-08	-
2-methylserine	53229	X_716923_SNP	FBgn0264449	CG43867	INTRON	0	A	G	G	0.1	4	36	-3.323	1.41183e-08	(TF_binding_site|mE1_TFBS_HSA|FBsf0000377891);(TF_binding_site|mE1_TFBS_sens|FBsf0000218925)
2-methylserine	53229	X_717525_SNP	FBgn0264449	CG43867	INTRON	0	T	G	G	0.1	4	36	-3.323	1.41183e-08	-
2-methylserine	53229	X_720230_SNP	FBgn0264449	CG43867	INTRON	0	T	G	G	0.1	4	36	-3.323	1.41183e-08	(TF_binding_site|mE1_TFBS_h|FBsf0000257704);(TF_binding_site|mE1_TFBS_HSA|FBsf0000377894);(TF_binding_site|mE1_TFBS_sens|FBsf0000218927)
2-methylserine	53229	X_729701_DEL	FBgn0264449	CG43867	INTRON	0	C	CTTCTC	CTTCTC	0.1	4	36	-3.323	1.41183e-08	-
2-methylserine	53229	X_732233_SNP	FBgn0264449	CG43867	INTRON	0	A	G	G	0.1	4	36	-3.323	1.41183e-08	-
2-methylserine	53229	X_732284_INS	FBgn0264449	CG43867	INTRON	0	AAAAGGAA	T	T	0.1	4	36	-3.323	1.41183e-08	-
2-methylserine	53229	X_732290_SNP	FBgn0264449	CG43867	INTRON	0	T	C	C	0.1	4	36	-3.323	1.41183e-08	-
2-methylserine	53229	X_734132_SNP	FBgn0264449	CG43867	INTRON	0	C	T	T	0.1	4	36	-3.323	1.41183e-08	(TF_binding_site|mE1_TFBS_Trl|FBsf0000342061)
2-methylserine	53229	X_738244_SNP	FBgn0264449	CG43867	INTRON	0	A	C	C	0.1	4	36	-3.323	1.41183e-08	(TF_binding_site|mE1_TFBS_bab1|FBsf0000214901);(TF_binding_site|mE1_TFBS_HSA|FBsf0000377897);(TF_binding_site|mE1_TFBS_sens|FBsf0000218932)
2-methylserine	53229	X_738244_SNP	FBgn0029535	CG14635	UPSTREAM	612	A	C	C	0.1	4	36	-3.323	1.41183e-08	(TF_binding_site|mE1_TFBS_bab1|FBsf0000214901);(TF_binding_site|mE1_TFBS_HSA|FBsf0000377897);(TF_binding_site|mE1_TFBS_sens|FBsf0000218932)
2-methylserine	53229	X_739633_SNP	FBgn0264449	CG43867	INTRON	0	C	G	G	0.1	4	36	-3.323	1.41183e-08	-
2-methylserine	53229	X_739633_SNP	FBgn0029535	CG14635	DOWNSTREAM	303	C	G	G	0.1	4	36	-3.323	1.41183e-08	-
2-methylserine	53229	X_739633_SNP	FBgn0040343	CG3713	DOWNSTREAM	571	C	G	G	0.1	4	36	-3.323	1.41183e-08	-
2-methylserine	53229	X_743044_SNP	FBgn0264449	CG43867	INTRON	0	T	C	C	0.1	4	36	-3.323	1.41183e-08	(TF_binding_site|mE1_TFBS_HSA|FBsf0000377900)
2-methylserine	53229	X_744238_SNP	FBgn0264449	CG43867	INTRON	0	T	C	C	0.1	4	36	-3.323	1.41183e-08	-
2-methylserine	53229	X_746869_SNP	FBgn0264449	CG43867	INTRON	0	A	G	G	0.1	4	36	-3.323	1.41183e-08	-
2-methylserine	53229	X_748539_SNP	FBgn0264449	CG43867	INTRON	0	T	C	C	0.1	4	36	-3.323	1.41183e-08	-
2-methylserine	53229	X_748848_SNP	FBgn0264449	CG43867	INTRON	0	C	T	T	0.1	4	36	-3.323	1.41183e-08	-
2-methylserine	53229	X_750253_SNP	FBgn0264449	CG43867	INTRON	0	A	C	C	0.1	4	36	-3.323	1.41183e-08	(TF_binding_site|mE1_TFBS_chinmo|FBsf0000207961)
2-methylserine	53229	X_750401_SNP	FBgn0264449	CG43867	INTRON	0	T	A	A	0.1	4	36	-3.323	1.41183e-08	(TF_binding_site|mE1_TFBS_chinmo|FBsf0000207961)
2-methylserine	53229	X_751669_SNP	FBgn0264449	CG43867	INTRON	0	T	C	C	0.1	4	36	-3.323	1.41183e-08	(TF_binding_site|mE1_TFBS_chinmo|FBsf0000207961)
2-methylserine	53229	X_751889_SNP	FBgn0264449	CG43867	INTRON	0	T	G	G	0.1	4	36	-3.323	1.41183e-08	(TF_binding_site|mE1_TFBS_chinmo|FBsf0000207961)
2-methylserine	53229	X_756015_SNP	FBgn0264449	CG43867	INTRON	0	A	G	G	0.1	4	36	-3.323	1.41183e-08	-
2-methylserine	53229	X_756015_SNP	FBgn0040892	CG14634	UPSTREAM	626	A	G	G	0.1	4	36	-3.323	1.41183e-08	-
2-methylserine	53229	X_756038_SNP	FBgn0264449	CG43867	INTRON	0	G	A	A	0.1	4	36	-3.323	1.41183e-08	-
2-methylserine	53229	X_756038_SNP	FBgn0040892	CG14634	UPSTREAM	603	G	A	A	0.1	4	36	-3.323	1.41183e-08	-
2-methylserine	53229	X_757156_SNP	FBgn0264449	CG43867	INTRON	0	C	T	T	0.1	4	36	-3.323	1.41183e-08	-
2-methylserine	53229	X_757156_SNP	FBgn0040892	CG14634	UTR_3_PRIME	0	C	T	T	0.1	4	36	-3.323	1.41183e-08	-
2-methylserine	53229	X_678181_SNP	FBgn0086368	tw	UPSTREAM	598	C	T	T	0.1026	4	35	-3.326	1.44527e-08	(TF_binding_site|BDTNP1_TFBS_dl|FBsf0000315593);(TF_binding_site|mE1_TFBS_bab1|FBsf0000214899);(TF_binding_site|mE1_TFBS_HSA|FBsf0000377873)
2-methylserine	53229	X_678181_SNP	FBgn0027343	fz3	DOWNSTREAM	846	C	T	T	0.1026	4	35	-3.326	1.44527e-08	(TF_binding_site|BDTNP1_TFBS_dl|FBsf0000315593);(TF_binding_site|mE1_TFBS_bab1|FBsf0000214899);(TF_binding_site|mE1_TFBS_HSA|FBsf0000377873)
2-methylserine	53229	X_665946_SNP	FBgn0027343	fz3	INTRON	0	A	G	G	0.1026	4	35	-3.325	1.45711e-08	(TF_binding_site|BDTNP1_TFBS_da|FBsf0000331225);(TF_binding_site|BDTNP1_TFBS_dl|FBsf0000315586);(TF_binding_site|BDTNP1_TFBS_Med|FBsf0000287350);(TF_binding_site|BDTNP1_TFBS_prd|FBsf0000275851);(TF_binding_site|BDTNP1_TFBS_twi|FBsf0000204718);(TF_binding_site|mE1_TFBS_HSA|FBsf0000377867);(TF_binding_site|mE1_TFBS_sens|FBsf0000218904)
2-methylserine	53229	X_757078_SNP	FBgn0040892	CG14634	NON_SYNONYMOUS_CODING	0	T	C	C	0.1026	4	35	-3.325	1.45711e-08	(TF_binding_site|mE1_TFBS_chinmo|FBsf0000207962)
2-methylserine	53229	X_757078_SNP	FBgn0264449	CG43867	INTRON	0	T	C	C	0.1026	4	35	-3.325	1.45711e-08	(TF_binding_site|mE1_TFBS_chinmo|FBsf0000207962)
2-methylserine	53229	2L_2198192_INS	FBgn0085201	CG34172	UPSTREAM	281	CC	C	C	0.1111	4	32	-3.297	1.46051e-08	(TF_binding_site|BDTNP1_TFBS_dl|FBsf0000296178);(TF_binding_site|BDTNP1_TFBS_z|FBsf0000195956);(TF_binding_site|mE1_TFBS_sens|FBsf0000215617)
2-methylserine	53229	3R_12061612_SNP	FBgn0040071	tara	INTRON	0	C	T	T	0.1	4	36	-3.328	1.46867e-08	(TF_binding_site|BDTNP1_TFBS_da|FBsf0000329427);(TF_binding_site|BDTNP1_TFBS_dl|FBsf0000312040);(TF_binding_site|BDTNP1_TFBS_hb|FBsf0000292537);(TF_binding_site|BDTNP1_TFBS_Med|FBsf0000285526);(TF_binding_site|BDTNP1_TFBS_twi|FBsf0000265153);(TF_binding_site|mE1_TFBS_HSA|FBsf0000372129)
2-methylserine	53229	X_742165_SNP	FBgn0264449	CG43867	INTRON	0	G	A	A	0.1026	4	35	-3.325	1.4813e-08	(TF_binding_site|BDTNP1_TFBS_dl|FBsf0000315611);(TF_binding_site|mE1_TFBS_HSA|FBsf0000377900)
2-methylserine	53229	X_742165_SNP	FBgn0040343	CG3713	UPSTREAM	975	G	A	A	0.1026	4	35	-3.325	1.4813e-08	(TF_binding_site|BDTNP1_TFBS_dl|FBsf0000315611);(TF_binding_site|mE1_TFBS_HSA|FBsf0000377900)
2-methylserine	53229	X_743091_SNP	FBgn0264449	CG43867	INTRON	0	C	T	T	0.1026	4	35	-3.325	1.4813e-08	(TF_binding_site|mE1_TFBS_HSA|FBsf0000377900)
2-methylserine	53229	X_749472_SNP	FBgn0264449	CG43867	INTRON	0	C	T	T	0.1026	4	35	-3.325	1.4813e-08	(TF_binding_site|mE1_TFBS_sbb|FBsf0000250407)
2-methylserine	53229	X_732530_SNP	FBgn0264449	CG43867	INTRON	0	A	G	G	0.1053	4	34	-3.327	1.5373e-08	-
2-methylserine	53229	2L_18376890_SNP	FBgn0000636	Fas3	INTRON	0	T	C	C	0.125	5	35	-2.973	1.55327e-08	-
2-methylserine	53229	2R_7964684_SNP	FBgn0033679	CG8888	SYNONYMOUS_CODING	0	T	C	C	0.1026	4	35	-3.299	1.61676e-08	-
2-methylserine	53229	X_633721_SNP	FBgn0021764	sdk	INTRON	0	A	G	G	0.1026	4	35	-3.317	1.72515e-08	-
2-methylserine	53229	X_665133_SNP	FBgn0027343	fz3	INTRON	0	A	G	G	0.1026	4	35	-3.317	1.72515e-08	(TF_binding_site|BDTNP1_TFBS_dl|FBsf0000315585);(TF_binding_site|BDTNP1_TFBS_Med|FBsf0000287349);(TF_binding_site|BDTNP1_TFBS_prd|FBsf0000275851);(TF_binding_site|mE1_TFBS_HSA|FBsf0000377867)
2-methylserine	53229	X_764592_DEL	FBgn0264449	CG43867	INTRON	0	T	TACCCC	TACCCC	0.1053	4	34	-3.319	1.7541e-08	-
2-methylserine	53229	X_720182_INS	FBgn0264449	CG43867	INTRON	0	TAAAATCGGAAGGAGGTTGTCCGTCTCA	T	T	0.1176	4	30	-3.336	1.87388e-08	(TF_binding_site|mE1_TFBS_h|FBsf0000257704);(TF_binding_site|mE1_TFBS_HSA|FBsf0000377894)
2-methylserine	53229	X_675366_SNP	FBgn0027343	fz3	INTRON	0	A	T	T	0.1053	4	34	-3.314	1.9041e-08	(TF_binding_site|BDTNP1_TFBS_twi|FBsf0000204720)
2-methylserine	53229	3R_448859_SNP	FBgn0087012	5-HT2A	SYNONYMOUS_CODING	0	A	G	G	0.1026	4	35	-3.273	1.91812e-08	(TF_binding_site|mE1_TFBS_HSA|FBsf0000368329);(TF_binding_site|mE1_TFBS_inv|FBsf0000236942);(TF_binding_site|mE1_TFBS_sens|FBsf0000230093)
2-methylserine	53229	2L_2196519_SNP	FBgn0085201	CG34172	INTRON	0	A	G	G	0.1	4	36	-3.267	1.94884e-08	(TF_binding_site|BDTNP1_TFBS_da|FBsf0000321146);(TF_binding_site|BDTNP1_TFBS_dl|FBsf0000296176);(TF_binding_site|BDTNP1_TFBS_Med|FBsf0000277270);(TF_binding_site|BDTNP1_TFBS_prd|FBsf0000274746);(TF_binding_site|BDTNP1_TFBS_sna|FBsf0000268221);(TF_binding_site|BDTNP1_TFBS_twi|FBsf0000200625);(TF_binding_site|mE1_TFBS_sens|FBsf0000215616)
2-methylserine	53229	2L_2196524_SNP	FBgn0085201	CG34172	INTRON	0	A	G	G	0.1	4	36	-3.267	1.94884e-08	(TF_binding_site|BDTNP1_TFBS_da|FBsf0000321146);(TF_binding_site|BDTNP1_TFBS_dl|FBsf0000296176);(TF_binding_site|BDTNP1_TFBS_Med|FBsf0000277270);(TF_binding_site|BDTNP1_TFBS_prd|FBsf0000274746);(TF_binding_site|BDTNP1_TFBS_sna|FBsf0000268221);(TF_binding_site|BDTNP1_TFBS_twi|FBsf0000200625);(TF_binding_site|mE1_TFBS_sens|FBsf0000215616)
2-methylserine	53229	3L_10880221_DEL	FBgn0027615	CG6404	UPSTREAM	650	T	AGAGGGTTGCGTATGCA	AGAGGGTTGCGTATGCA	0.1026	4	35	-3.286	1.98349e-08	-
2-methylserine	53229	X_651432_SNP	FBgn0040383	CG5254	INTRON	0	T	C	C	0.1081	4	33	-3.311	2.04979e-08	-
2-methylserine	53229	3R_26168405_SNP	FBgn0010113	hdc	INTRON	0	G	T	T	0.1316	5	33	-2.983	2.11744e-08	-
2-methylserine	53229	2L_17693460_SNP	FBgn0015609	CadN	INTRON	0	A	G	G	0.1026	4	35	-3.279	2.13208e-08	(TF_binding_site|mE1_TFBS_HSA|FBsf0000351947);(TF_binding_site|mE1_TFBS_inv|FBsf0000235022)
2-methylserine	53229	X_13144666_SNP	FBgn0004456	mew	INTRON	0	G	A	A	0.1026	4	35	-3.296	2.3005e-08	(enhancer|mE1_CBP_Enhancers|FBsf0000343838);(TF_binding_site|BDTNP1_TFBS_twi|FBsf0000205883)
2-methylserine	53229	X_13144684_SNP	FBgn0004456	mew	INTRON	0	C	T	T	0.1026	4	35	-3.296	2.3005e-08	(enhancer|mE1_CBP_Enhancers|FBsf0000343838);(TF_binding_site|BDTNP1_TFBS_twi|FBsf0000205883)
2-methylserine	53229	3R_7514847_SNP	FBgn0037936	CG6908	INTRON	0	C	T	T	0.1143	4	31	-3.3	2.30331e-08	(TF_binding_site|BDTNP1_TFBS_z|FBsf0000197555)
2-methylserine	53229	3R_7514847_SNP	FBgn0037935	CG6834	UPSTREAM	992	C	T	T	0.1143	4	31	-3.3	2.30331e-08	(TF_binding_site|BDTNP1_TFBS_z|FBsf0000197555)
2-methylserine	53229	3R_14643448_SNP	FBgn0038653	CG18208	INTRON	0	C	T	C	0.125	5	35	-2.998	2.35732e-08	-
2-methylserine	53229	2L_2196529_SNP	FBgn0085201	CG34172	INTRON	0	T	G	G	0.1053	4	34	-3.264	2.3927e-08	(TF_binding_site|BDTNP1_TFBS_da|FBsf0000321146);(TF_binding_site|BDTNP1_TFBS_dl|FBsf0000296176);(TF_binding_site|BDTNP1_TFBS_Med|FBsf0000277270);(TF_binding_site|BDTNP1_TFBS_prd|FBsf0000274746);(TF_binding_site|BDTNP1_TFBS_sna|FBsf0000268221);(TF_binding_site|BDTNP1_TFBS_twi|FBsf0000200625);(TF_binding_site|mE1_TFBS_sens|FBsf0000215616)
2-methylserine	53229	2R_18854123_SNP	Intergenic	Intergenic	Intergenic		A	C	C	0.1053	4	34	-3.284	2.40593e-08	-
2-methylserine	53229	X_17453348_SNP	FBgn0263706	CG43658	INTRON	0	G	C	C	0.125	5	35	-2.973	2.4169e-08	-
2-methylserine	53229	3R_9982430_SNP	FBgn0051533	CG31533	NON_SYNONYMOUS_CODING	0	T	C	C	0.1053	4	34	-3.28	2.43747e-08	(TF_binding_site|mE1_TFBS_HSA|FBsf0000371458);(TF_binding_site|mE1_TFBS_sens|FBsf0000231665)
2-methylserine	53229	3R_9982430_SNP	FBgn0051327	CG31327	DOWNSTREAM	852	T	C	C	0.1053	4	34	-3.28	2.43747e-08	(TF_binding_site|mE1_TFBS_HSA|FBsf0000371458);(TF_binding_site|mE1_TFBS_sens|FBsf0000231665)
2-methylserine	53229	2L_18383748_SNP	FBgn0000636	Fas3	INTRON	0	G	A	A	0.1053	4	34	-3.274	2.46085e-08	(TF_binding_site|mE1_TFBS_cad|FBsf0000242326);(TF_binding_site|mE1_TFBS_chinmo|FBsf0000207777);(TF_binding_site|mE1_TFBS_HSA|FBsf0000352110)
2-methylserine	53229	2L_8176227_SNP	FBgn0264953	Piezo	INTRON	0	T	C	C	0.1282	5	34	-2.972	2.46602e-08	-
2-methylserine	53229	2L_12034013_SNP	FBgn0010497	dmGlut	UTR_3_PRIME	0	G	A	G	0.1026	4	35	-3.255	2.512e-08	-
2-methylserine	53229	2L_12034013_SNP	FBgn0042126	CG18788	UPSTREAM	177	G	A	G	0.1026	4	35	-3.255	2.512e-08	-
2-methylserine	53229	2L_7153807_SNP	FBgn0085407	Pvf3	INTRON	0	G	A	A	0.1026	4	35	-3.283	2.85178e-08	-
2-phosphoglycerate	35629	3R_22788698_SNP	FBgn0039465	Tsp97E	INTRON	0	C	T	T	0.1	4	36	-1.616	1.95059e-09	-
2-phosphoglycerate	35629	3R_476151_SNP	FBgn0087013	Karybeta3	INTRON	0	A	C	C	0.1389	5	31	-1.48	2.39223e-09	(TF_binding_site|BDTNP1_TFBS_da|FBsf0000328061);(TF_binding_site|BDTNP1_TFBS_dl|FBsf0000309482);(TF_binding_site|BDTNP1_TFBS_gt|FBsf0000294176);(TF_binding_site|BDTNP1_TFBS_Med|FBsf0000284114);(TF_binding_site|BDTNP1_TFBS_twi|FBsf0000264049);(TF_binding_site|mE1_TFBS_HSA|FBsf0000368342)
2-phosphoglycerate	35629	3L_12376155_SNP	FBgn0036279	Ncc69	INTRON	0	A	G	G	0.15	6	34	-1.36	3.27889e-09	-
2-phosphoglycerate	35629	3L_12376175_SNP	FBgn0036279	Ncc69	INTRON	0	C	T	T	0.15	6	34	-1.36	3.27889e-09	-
2-phosphoglycerate	35629	2L_9964089_INS	FBgn0015664	Dref	DOWNSTREAM	57	TT	T	T	0.1143	4	31	-1.596	6.71744e-09	-
2-phosphoglycerate	35629	2L_9964089_INS	FBgn0032172	CG5850	UPSTREAM	141	TT	T	T	0.1143	4	31	-1.596	6.71744e-09	-
2-phosphoglycerate	35629	3R_14936563_SNP	FBgn0038679	CG6040	INTRON	0	T	G	G	0.1	4	36	-1.582	7.04868e-09	-
2-phosphoglycerate	35629	3L_15295725_SNP	FBgn0036492	Best3	INTRON	0	C	G	G	0.1026	4	35	-1.581	8.08748e-09	-
2-phosphoglycerate	35629	2L_9964093_SNP	FBgn0015664	Dref	DOWNSTREAM	54	T	A	A	0.1176	4	30	-1.593	8.11978e-09	-
2-phosphoglycerate	35629	2L_9964093_SNP	FBgn0032172	CG5850	UPSTREAM	144	T	A	A	0.1176	4	30	-1.593	8.11978e-09	-
2-phosphoglycerate	35629	2R_17655662_SNP	FBgn0050395	CG30395	NON_SYNONYMOUS_CODING	0	A	G	A	0.1667	6	30	-1.332	9.44101e-09	-
2-phosphoglycerate	35629	3R_13699955_SNP	FBgn0053547	Rim	DOWNSTREAM	808	T	G	G	0.1111	4	32	-1.581	9.61037e-09	-
2-phosphoglycerate	35629	2R_19601141_SNP	FBgn0034897	Sesn	UPSTREAM	282	T	A	A	0.1026	4	35	-1.562	1.64443e-08	(TF_binding_site|BDTNP1_TFBS_dl|FBsf0000304197);(TF_binding_site|mE1_TFBS_HSA|FBsf0000359911);(TF_binding_site|mE1_TFBS_inv|FBsf0000236891);(TF_binding_site|mE1_TFBS_Trl|FBsf0000339170)
2-phosphoglycerate	35629	3L_291445_SNP	FBgn0264707	RhoGEF3	INTRON	0	G	A	A	0.15	6	34	-1.307	2.24777e-08	(TF_binding_site|BDTNP1_TFBS_dl|FBsf0000304676);(TF_binding_site|mE1_TFBS_HSA|FBsf0000360641);(TF_binding_site|mE1_TFBS_sens|FBsf0000222128)
2-phosphoglycerate	35629	3L_293746_SNP	FBgn0264707	RhoGEF3	INTRON	0	A	C	C	0.15	6	34	-1.307	2.24777e-08	(TF_binding_site|BDTNP1_TFBS_dl|FBsf0000304678);(TF_binding_site|BDTNP1_TFBS_twi|FBsf0000202557)
2-phosphoglycerate	35629	2L_12539463_SNP	FBgn0259176	bun	SYNONYMOUS_CODING	0	T	C	C	0.1	4	36	-1.547	2.45673e-08	(TF_binding_site|BDTNP1_TFBS_dl|FBsf0000298318);(TF_binding_site|mE1_TFBS_chinmo|FBsf0000207634)
2-phosphoglycerate	35629	2R_19600724_SNP	FBgn0034897	Sesn	UPSTREAM	699	A	G	G	0.1	4	36	-1.547	2.45673e-08	(TF_binding_site|BDTNP1_TFBS_dl|FBsf0000304197);(TF_binding_site|mE1_TFBS_HSA|FBsf0000359911);(TF_binding_site|mE1_TFBS_inv|FBsf0000236891);(TF_binding_site|mE1_TFBS_Trl|FBsf0000339170)
2-phosphoglycerate	35629	2R_19601124_SNP	FBgn0034897	Sesn	UPSTREAM	299	A	T	T	0.1053	4	34	-1.56	2.53995e-08	(TF_binding_site|BDTNP1_TFBS_dl|FBsf0000304197);(TF_binding_site|mE1_TFBS_HSA|FBsf0000359911);(TF_binding_site|mE1_TFBS_inv|FBsf0000236891);(TF_binding_site|mE1_TFBS_Trl|FBsf0000339170)
2-phosphoglycerate	35629	2L_3471932_SNP	FBgn0051776	CG31776	SYNONYMOUS_CODING	0	A	G	G	0.15	6	34	-1.299	2.59127e-08	(TF_binding_site|BDTNP1_TFBS_prd|FBsf0000274771);(TF_binding_site|mE1_TFBS_bab1|FBsf0000213959)
2-phosphoglycerate	35629	2L_3471932_SNP	FBgn0051956	pgant4	UPSTREAM	671	A	G	G	0.15	6	34	-1.299	2.59127e-08	(TF_binding_site|BDTNP1_TFBS_prd|FBsf0000274771);(TF_binding_site|mE1_TFBS_bab1|FBsf0000213959)
3,4-dihydroxyphenylacetate	18296	2L_11340564_SNP	Intergenic	Intergenic	Intergenic		G	C	C	0.1	4	36	-0.1651	4.9172e-11	-
3,4-dihydroxyphenylacetate	18296	2L_11346510_SNP	Intergenic	Intergenic	Intergenic		A	G	G	0.1	4	36	-0.163	1.1151e-10	(TF_binding_site|BDTNP1_TFBS_twi|FBsf0000201476);(TF_binding_site|mE1_TFBS_HSA|FBsf0000347693)
3,4-dihydroxyphenylacetate	18296	2R_13761768_MNP	FBgn0011589	Elk	INTRON	0	TAT	CTC	CTC	0.1026	4	35	-0.1605	5.29199e-09	-
3,4-dihydroxyphenylacetate	18296	2R_5086652_SNP	FBgn0015561	unpg	SYNONYMOUS_CODING	0	T	C	C	0.1053	4	34	-0.159	1.00176e-08	(TF_binding_site|mE1_TFBS_cad|FBsf0000246164);(TF_binding_site|mE1_TFBS_chinmo|FBsf0000210971)
3,4-dihydroxyphenylacetate	18296	2R_10676159_SNP	FBgn0001319	kn	INTRON	0	A	G	G	0.15	6	34	-0.1322	1.46773e-08	(TF_binding_site|BDTNP1_TFBS_da|FBsf0000324250);(TF_binding_site|BDTNP1_TFBS_dl|FBsf0000302192);(TF_binding_site|BDTNP1_TFBS_twi|FBsf0000199392);(TF_binding_site|mE1_TFBS_HSA|FBsf0000356814);(TF_binding_site|mE1_TFBS_sens|FBsf0000228045)
3,4-dihydroxyphenylacetate	18296	2R_7038551_SNP	FBgn0033579	CG13229	INTRON	0	C	T	T	0.1026	4	35	-0.1575	1.49781e-08	-
3,4-dihydroxyphenylacetate	18296	2R_7038551_SNP	FBgn0033581	CG12391	UPSTREAM	978	C	T	T	0.1026	4	35	-0.1575	1.49781e-08	-
3,4-dihydroxyphenylacetate	18296	2R_7038558_SNP	FBgn0033579	CG13229	INTRON	0	C	T	T	0.1026	4	35	-0.1575	1.49781e-08	-
3,4-dihydroxyphenylacetate	18296	2R_7038558_SNP	FBgn0033581	CG12391	UPSTREAM	985	C	T	T	0.1026	4	35	-0.1575	1.49781e-08	-
3,4-dihydroxyphenylacetate	18296	3L_24505132_SNP	Intergenic	Intergenic	Intergenic		G	T	T	0.1515	5	28	-0.1445	1.75291e-08	-
3,4-dihydroxyphenylacetate	18296	2R_11044964_SNP	FBgn0013467	igl	INTRON	0	C	A	A	0.1026	4	35	-0.1564	2.12948e-08	-
3,4-dihydroxyphenylacetate	18296	3R_7891972_SNP	Intergenic	Intergenic	Intergenic		T	A	T	0.1053	4	34	-0.1469	2.60272e-08	-
3-hydroxyisobutyrate	1549	X_14943449_SNP	FBgn0030600	hiw	INTRON	0	A	T	T	0.1282	5	34	-0.7405	2.14458e-09	(TF_binding_site|BDTNP1_TFBS_dl|FBsf0000319141);(TF_binding_site|mE1_TFBS_inv|FBsf0000235481);(TF_binding_site|mE1_TFBS_Trl|FBsf0000343006)
3-hydroxyisobutyrate	1549	X_14943449_SNP	FBgn0030603	CG5541	INTRON	0	A	T	T	0.1282	5	34	-0.7405	2.14458e-09	(TF_binding_site|BDTNP1_TFBS_dl|FBsf0000319141);(TF_binding_site|mE1_TFBS_inv|FBsf0000235481);(TF_binding_site|mE1_TFBS_Trl|FBsf0000343006)
3-hydroxyisobutyrate	1549	3R_17532524_SNP	FBgn0051176	CG31176	INTRON	0	T	A	A	0.1538	6	33	-0.6799	2.4919e-09	-
3-hydroxypropanoate	1556	2R_12854447_SNP	Intergenic	Intergenic	Intergenic		G	T	G	0.1351	5	32	-0.6877	1.42863e-08	-
3-ureidopropionate	3155	3R_26480639_SNP	Intergenic	Intergenic	Intergenic		T	A	A	0.125	5	35	-1.393	4.7242e-09	-
3-ureidopropionate	3155	3R_26480647_SNP	Intergenic	Intergenic	Intergenic		G	C	C	0.125	5	35	-1.393	4.7242e-09	-
3-ureidopropionate	3155	3R_26480660_SNP	Intergenic	Intergenic	Intergenic		T	C	C	0.125	5	35	-1.393	4.7242e-09	-
3-ureidopropionate	3155	3R_21680115_SNP	FBgn0039379	CG5886	DOWNSTREAM	404	G	T	T	0.1622	6	31	-1.282	1.02631e-08	-
3-ureidopropionate	3155	3R_27026565_SNP	FBgn0039827	CG1544	INTRON	0	C	T	C	0.1053	4	34	-1.516	1.16433e-08	(TF_binding_site|mE1_TFBS_cad|FBsf0000249647);(TF_binding_site|mE1_TFBS_HSA|FBsf0000376943)
3-ureidopropionate	3155	2R_18284810_SNP	FBgn0034724	babos	INTRON	0	A	T	T	0.1143	4	31	-1.509	1.90399e-08	(TF_binding_site|BDTNP1_TFBS_da|FBsf0000325136);(TF_binding_site|BDTNP1_TFBS_dl|FBsf0000303888);(TF_binding_site|BDTNP1_TFBS_Med|FBsf0000281253);(TF_binding_site|BDTNP1_TFBS_twi|FBsf0000200141);(TF_binding_site|mE1_TFBS_cad|FBsf0000247256);(TF_binding_site|mE1_TFBS_HSA|FBsf0000359388)
3-ureidopropionate	3155	3L_5145560_SNP	FBgn0263831	Gen	UPSTREAM	84	A	T	T	0.1026	4	35	-1.49	2.59078e-08	(TF_binding_site|BDTNP1_TFBS_da|FBsf0000326116);(TF_binding_site|BDTNP1_TFBS_dl|FBsf0000305703);(TF_binding_site|BDTNP1_TFBS_Med|FBsf0000282218);(TF_binding_site|BDTNP1_TFBS_slp1|FBsf0000272467);(TF_binding_site|BDTNP1_TFBS_twi|FBsf0000202986);(TF_binding_site|mE1_TFBS_D|FBsf0000239126);(TF_binding_site|mE1_TFBS_disco|FBsf0000260138);(TF_binding_site|mE1_TFBS_GATAe|FBsf0000258501);(TF_binding_sit…
3-ureidopropionate	3155	3L_5145560_SNP	FBgn0010747	Srp54k	UPSTREAM	218	A	T	T	0.1026	4	35	-1.49	2.59078e-08	(TF_binding_site|BDTNP1_TFBS_da|FBsf0000326116);(TF_binding_site|BDTNP1_TFBS_dl|FBsf0000305703);(TF_binding_site|BDTNP1_TFBS_Med|FBsf0000282218);(TF_binding_site|BDTNP1_TFBS_slp1|FBsf0000272467);(TF_binding_site|BDTNP1_TFBS_twi|FBsf0000202986);(TF_binding_site|mE1_TFBS_D|FBsf0000239126);(TF_binding_site|mE1_TFBS_disco|FBsf0000260138);(TF_binding_site|mE1_TFBS_GATAe|FBsf0000258501);(TF_binding_sit…
3-ureidopropionate	3155	3L_5572033_SNP	Intergenic	Intergenic	Intergenic		T	G	G	0.1026	4	35	-1.489	2.73792e-08	-
4-guanidinobutanoate	15681	3R_13069733_SNP	FBgn0038494	beat-IIb	INTRON	0	G	A	A	0.1	4	36	-0.6752	1.83568e-09	-
4-guanidinobutanoate	15681	3R_13069735_SNP	FBgn0038494	beat-IIb	INTRON	0	A	T	T	0.1	4	36	-0.6752	1.83568e-09	-
4-guanidinobutanoate	15681	3R_13071039_SNP	FBgn0038494	beat-IIb	INTRON	0	G	A	A	0.1	4	36	-0.6752	1.83568e-09	-
4-guanidinobutanoate	15681	3R_13071800_SNP	FBgn0038494	beat-IIb	INTRON	0	A	G	G	0.1	4	36	-0.6752	1.83568e-09	-
4-guanidinobutanoate	15681	3R_13073369_SNP	FBgn0038494	beat-IIb	UTR_5_PRIME	0	C	T	T	0.1	4	36	-0.6752	1.83568e-09	(TF_binding_site|BDTNP1_TFBS_twi|FBsf0000265315)
4-guanidinobutanoate	15681	3R_13074211_SNP	FBgn0038494	beat-IIb	INTRON	0	A	C	C	0.1	4	36	-0.6752	1.83568e-09	-
4-guanidinobutanoate	15681	3R_13070781_SNP	FBgn0038494	beat-IIb	INTRON	0	C	A	A	0.1026	4	35	-0.6729	2.34777e-09	-
4-guanidinobutanoate	15681	X_10436856_SNP	FBgn0085443	spri	INTRON	0	T	G	G	0.1111	4	32	-0.6613	7.5367e-09	-
4-guanidinobutanoate	15681	3L_2263301_SNP	FBgn0035323	CG13807	INTRON	0	T	C	C	0.1	4	36	-0.645	1.5232e-08	(TF_binding_site|BDTNP1_TFBS_da|FBsf0000325819);(TF_binding_site|BDTNP1_TFBS_dl|FBsf0000305150);(TF_binding_site|BDTNP1_TFBS_Med|FBsf0000281936);(TF_binding_site|BDTNP1_TFBS_twi|FBsf0000202751);(TF_binding_site|mE1_TFBS_cad|FBsf0000244042);(TF_binding_site|mE1_TFBS_HSA|FBsf0000361431);(TF_binding_site|mE1_TFBS_sens|FBsf0000222602)
4-guanidinobutanoate	15681	3L_2263301_SNP	FBgn0000543	ecd	DOWNSTREAM	280	T	C	C	0.1	4	36	-0.645	1.5232e-08	(TF_binding_site|BDTNP1_TFBS_da|FBsf0000325819);(TF_binding_site|BDTNP1_TFBS_dl|FBsf0000305150);(TF_binding_site|BDTNP1_TFBS_Med|FBsf0000281936);(TF_binding_site|BDTNP1_TFBS_twi|FBsf0000202751);(TF_binding_site|mE1_TFBS_cad|FBsf0000244042);(TF_binding_site|mE1_TFBS_HSA|FBsf0000361431);(TF_binding_site|mE1_TFBS_sens|FBsf0000222602)
4-guanidinobutanoate	15681	3L_2263301_SNP	FBgn0015360	oxt	UPSTREAM	637	T	C	C	0.1	4	36	-0.645	1.5232e-08	(TF_binding_site|BDTNP1_TFBS_da|FBsf0000325819);(TF_binding_site|BDTNP1_TFBS_dl|FBsf0000305150);(TF_binding_site|BDTNP1_TFBS_Med|FBsf0000281936);(TF_binding_site|BDTNP1_TFBS_twi|FBsf0000202751);(TF_binding_site|mE1_TFBS_cad|FBsf0000244042);(TF_binding_site|mE1_TFBS_HSA|FBsf0000361431);(TF_binding_site|mE1_TFBS_sens|FBsf0000222602)
4-guanidinobutanoate	15681	3R_13068269_SNP	FBgn0038494	beat-IIb	INTRON	0	A	G	A	0.125	5	35	-0.5792	2.33437e-08	-
5-aminolevulinate	2290	2L_7497702_SNP	FBgn0264895	RapGAP1	DOWNSTREAM	103	G	A	A	0.1282	5	34	-0.643	3.1677e-10	-
5-aminolevulinate	2290	2L_7497702_SNP	FBgn0011283	Obp28a	UPSTREAM	337	G	A	A	0.1282	5	34	-0.643	3.1677e-10	-
5-aminolevulinate	2290	2R_9248122_SNP	Intergenic	Intergenic	Intergenic		T	C	C	0.1282	5	34	-0.6334	8.9764e-10	-
5-aminolevulinate	2290	2R_7418828_SNP	Intergenic	Intergenic	Intergenic		G	T	T	0.1316	5	33	-0.6333	1.74064e-09	(TF_binding_site|BDTNP1_TFBS_dl|FBsf0000301404);(TF_binding_site|BDTNP1_TFBS_slp1|FBsf0000272096)
5-aminolevulinate	2290	2L_7497750_SNP	FBgn0264895	RapGAP1	DOWNSTREAM	55	G	A	A	0.1282	5	34	-0.6276	2.75466e-09	-
5-aminolevulinate	2290	2L_7497750_SNP	FBgn0011283	Obp28a	UPSTREAM	385	G	A	A	0.1282	5	34	-0.6276	2.75466e-09	-
5-aminolevulinate	2290	2R_7137521_SNP	FBgn0262572	CG43112	DOWNSTREAM	83	A	G	G	0.1	4	36	-0.687	3.82179e-09	-
5-aminolevulinate	2290	2R_7137521_SNP	FBgn0026386	Or47a	UPSTREAM	352	A	G	G	0.1	4	36	-0.687	3.82179e-09	-
5-aminolevulinate	2290	2R_7137811_SNP	FBgn0026386	Or47a	UPSTREAM	62	A	C	C	0.1	4	36	-0.687	3.82179e-09	-
5-aminolevulinate	2290	2R_7137811_SNP	FBgn0262572	CG43112	DOWNSTREAM	373	A	C	C	0.1	4	36	-0.687	3.82179e-09	-
5-aminolevulinate	2290	2R_7137831_SNP	FBgn0026386	Or47a	UPSTREAM	42	T	C	C	0.1	4	36	-0.687	3.82179e-09	-
5-aminolevulinate	2290	2R_7137831_SNP	FBgn0262572	CG43112	DOWNSTREAM	393	T	C	C	0.1	4	36	-0.687	3.82179e-09	-
5-aminolevulinate	2290	2L_12158685_SNP	FBgn0051760	CG31760	INTRON	0	G	A	A	0.1579	6	32	-0.5744	3.95785e-09	(TF_binding_site|mE1_TFBS_inv|FBsf0000234885)
5-aminolevulinate	2290	3L_8662845_SNP	Intergenic	Intergenic	Intergenic		G	T	T	0.1351	5	32	-0.6184	5.00112e-09	(regulatory_region|FlyBase|FBsf0000161368);(TF_binding_site|BDTNP1_TFBS_bcd|FBsf0000333852);(TF_binding_site|BDTNP1_TFBS_da|FBsf0000326415);(TF_binding_site|BDTNP1_TFBS_ftz|FBsf0000295288);(TF_binding_site|BDTNP1_TFBS_gt|FBsf0000293864);(TF_binding_site|BDTNP1_TFBS_hb|FBsf0000291265);(TF_binding_site|BDTNP1_TFBS_Med|FBsf0000282527);(TF_binding_site|BDTNP1_TFBS_prd|FBsf0000275462);(TF_binding_site…
5-aminolevulinate	2290	2R_4144599_SNP	FBgn0033277	CG14760	DOWNSTREAM	163	A	G	G	0.1026	4	35	-0.6786	5.08612e-09	-
5-aminolevulinate	2290	2L_10862411_SNP	FBgn0264351	CR43807	EXON	0	T	C	T	0.1	4	36	-0.6762	5.74527e-09	-
5-aminolevulinate	2290	2L_10862411_SNP	FBgn0027363	Stam	DOWNSTREAM	405	T	C	T	0.1	4	36	-0.6762	5.74527e-09	-
5-aminolevulinate	2290	2R_4098742_SNP	FBgn0053087	LRP1	SYNONYMOUS_CODING	0	T	C	C	0.1	4	36	-0.6762	5.74527e-09	-
5-aminolevulinate	2290	2R_4139196_SNP	Intergenic	Intergenic	Intergenic		C	G	G	0.1	4	36	-0.6762	5.74527e-09	(TF_binding_site|BDTNP1_TFBS_dl|FBsf0000300651);(TF_binding_site|mE1_TFBS_bab1|FBsf0000214180);(TF_binding_site|mE1_TFBS_cad|FBsf0000246063);(TF_binding_site|mE1_TFBS_zfh1|FBsf0000334628)
5-aminolevulinate	2290	2L_7499256_SNP	FBgn0264895	RapGAP1	INTRON	0	A	G	G	0.15	6	34	-0.5547	2.13195e-08	(TF_binding_site|mE1_TFBS_cad|FBsf0000241617)
6-phosphogluconate	15442	2L_18970961_SNP	FBgn0032728	Tango6	NON_SYNONYMOUS_CODING	0	G	C	C	0.1	4	36	-1.622	1.8496e-10	(TF_binding_site|mE1_TFBS_sens|FBsf0000218212)
6-phosphogluconate	15442	3L_9654253_SNP	FBgn0016081	fry	INTRON	0	T	A	A	0.1	4	36	-1.622	1.8496e-10	(TF_binding_site|BDTNP1_TFBS_twi|FBsf0000203348)
6-phosphogluconate	15442	3L_18433308_SNP	FBgn0036786	skl	UPSTREAM	266	A	G	G	0.1026	4	35	-1.592	7.0268e-10	(TF_binding_site|BDTNP1_TFBS_da|FBsf0000327547);(TF_binding_site|BDTNP1_TFBS_dl|FBsf0000308400);(TF_binding_site|BDTNP1_TFBS_Med|FBsf0000283575);(TF_binding_site|BDTNP1_TFBS_sna|FBsf0000269565);(TF_binding_site|BDTNP1_TFBS_twi|FBsf0000204204);(TF_binding_site|mE1_TFBS_D|FBsf0000239511);(TF_binding_site|mE1_TFBS_HSA|FBsf0000366562);(TF_binding_site|mE1_TFBS_HSA|FBsf0000366563);(TF_binding_site|mE1…
6-phosphogluconate	15442	3L_18433308_SNP	FBgn0262969	CR43280	UPSTREAM	522	A	G	G	0.1026	4	35	-1.592	7.0268e-10	(TF_binding_site|BDTNP1_TFBS_da|FBsf0000327547);(TF_binding_site|BDTNP1_TFBS_dl|FBsf0000308400);(TF_binding_site|BDTNP1_TFBS_Med|FBsf0000283575);(TF_binding_site|BDTNP1_TFBS_sna|FBsf0000269565);(TF_binding_site|BDTNP1_TFBS_twi|FBsf0000204204);(TF_binding_site|mE1_TFBS_D|FBsf0000239511);(TF_binding_site|mE1_TFBS_HSA|FBsf0000366562);(TF_binding_site|mE1_TFBS_HSA|FBsf0000366563);(TF_binding_site|mE1…
6-phosphogluconate	15442	3L_7395776_SNP	FBgn0035781	CG8560	INTRON	0	G	C	C	0.1	4	36	-1.587	7.7262e-10	(TF_binding_site|mE1_TFBS_HSA|FBsf0000362956);(TF_binding_site|mE1_TFBS_sens|FBsf0000223356)
6-phosphogluconate	15442	3L_7399308_SNP	FBgn0063083	pncr015:3L	UPSTREAM	115	A	G	G	0.1	4	36	-1.587	7.7262e-10	-
6-phosphogluconate	15442	3L_7399711_SNP	FBgn0063083	pncr015:3L	EXON	0	T	A	A	0.1	4	36	-1.587	7.7262e-10	-
6-phosphogluconate	15442	3L_7399866_SNP	FBgn0063083	pncr015:3L	DOWNSTREAM	147	A	G	G	0.1	4	36	-1.587	7.7262e-10	-
6-phosphogluconate	15442	2L_5249917_INS	FBgn0003716	tkv	INTRON	0	GG	G	G	0.125	5	35	-1.434	9.8072e-10	(TF_binding_site|mE1_TFBS_chinmo|FBsf0000207250);(TF_binding_site|mE1_TFBS_HSA|FBsf0000345606);(TF_binding_site|mE1_TFBS_sens|FBsf0000216206)
6-phosphogluconate	15442	2L_5249920_SNP	FBgn0003716	tkv	INTRON	0	C	A	A	0.125	5	35	-1.434	9.8072e-10	(TF_binding_site|mE1_TFBS_chinmo|FBsf0000207250);(TF_binding_site|mE1_TFBS_HSA|FBsf0000345606);(TF_binding_site|mE1_TFBS_sens|FBsf0000216206)
6-phosphogluconate	15442	2R_8421285_SNP	FBgn0011592	fra	INTRON	0	G	T	T	0.1053	4	34	-1.545	3.7274e-09	(TF_binding_site|BDTNP1_TFBS_dl|FBsf0000301664);(TF_binding_site|BDTNP1_TFBS_twi|FBsf0000199170);(TF_binding_site|mE1_TFBS_HSA|FBsf0000356031);(TF_binding_site|mE1_TFBS_sens|FBsf0000227616)
6-phosphogluconate	15442	2L_14848507_SNP	FBgn0028886	CG15279	INTRON	0	T	A	A	0.1053	4	34	-1.546	4.36482e-09	-
6-phosphogluconate	15442	3R_19587352_SNP	FBgn0039113	CG10217	SYNONYMOUS_CODING	0	A	G	G	0.1026	4	35	-1.535	4.68098e-09	(TF_binding_site|mE1_TFBS_sens|FBsf0000233173)
6-phosphogluconate	15442	2R_6393046_SNP	FBgn0005630	lola	INTRON	0	C	T	C	0.1	4	36	-1.532	4.6892e-09	(TF_binding_site|BDTNP1_TFBS_dl|FBsf0000301139);(TF_binding_site|mE1_TFBS_chinmo|FBsf0000211049);(TF_binding_site|mE1_TFBS_HSA|FBsf0000355306)
6-phosphogluconate	15442	2R_6864250_SNP	Intergenic	Intergenic	Intergenic		G	A	A	0.1026	4	35	-1.534	4.74143e-09	-
6-phosphogluconate	15442	3L_19242951_SNP	Intergenic	Intergenic	Intergenic		A	T	T	0.1026	4	35	-1.534	5.69443e-09	-
6-phosphogluconate	15442	2R_9349785_SNP	FBgn0000119	arr	INTRON	0	T	C	T	0.1351	5	32	-1.403	5.86696e-09	(TF_binding_site|mE1_TFBS_chinmo|FBsf0000211221)
6-phosphogluconate	15442	3L_18136588_SNP	FBgn0020300	gk	INTRON	0	T	G	G	0.1429	5	30	-1.4	6.2528e-09	-
6-phosphogluconate	15442	2R_6440442_SNP	Intergenic	Intergenic	Intergenic		G	A	A	0.125	5	35	-1.37	8.06547e-09	(TF_binding_site|BDTNP1_TFBS_da|FBsf0000323739);(TF_binding_site|BDTNP1_TFBS_dl|FBsf0000301168);(TF_binding_site|BDTNP1_TFBS_Med|FBsf0000279814);(TF_binding_site|BDTNP1_TFBS_twi|FBsf0000198969);(TF_binding_site|mE1_TFBS_HSA|FBsf0000355328);(TF_binding_site|mE1_TFBS_zfh1|FBsf0000334645)
6-phosphogluconate	15442	3L_7402072_SNP	FBgn0265718	CR44525	EXON	0	T	C	C	0.1316	5	33	-1.385	1.27955e-08	-
6-phosphogluconate	15442	2R_20228098_SNP	Intergenic	Intergenic	Intergenic		A	C	C	0.1	4	36	-1.495	1.53977e-08	-
6-phosphogluconate	15442	2R_20228104_SNP	Intergenic	Intergenic	Intergenic		A	T	T	0.1	4	36	-1.495	1.53977e-08	-
6-phosphogluconate	15442	2R_20228105_SNP	Intergenic	Intergenic	Intergenic		G	A	A	0.1	4	36	-1.495	1.53977e-08	-
6-phosphogluconate	15442	3R_23272639_SNP	Intergenic	Intergenic	Intergenic		T	A	A	0.1	4	36	-1.492	2.22181e-08	(TF_binding_site|BDTNP1_TFBS_da|FBsf0000330624)
6-phosphogluconate	15442	3R_14101934_SNP	FBgn0026250	eIF-1A	INTRON	0	A	T	T	0.125	5	35	-1.362	2.27578e-08	(TF_binding_site|BDTNP1_TFBS_prd|FBsf0000276660);(TF_binding_site|BDTNP1_TFBS_twi|FBsf0000265395);(TF_binding_site|mE1_TFBS_HSA|FBsf0000372845)
6-phosphogluconate	15442	2L_12326738_SNP	Intergenic	Intergenic	Intergenic		C	T	T	0.1	4	36	-1.493	2.51258e-08	-
6-phosphogluconate	15442	2L_12328170_SNP	Intergenic	Intergenic	Intergenic		T	C	C	0.1	4	36	-1.493	2.51258e-08	-
6-phosphogluconate	15442	2L_9528844_SNP	FBgn0032123	Oatp30B	INTRON	0	C	G	G	0.125	5	35	-1.348	2.6692e-08	-
6-phosphogluconate	15442	2L_9528844_SNP	FBgn0032122	CG31883	NON_SYNONYMOUS_CODING	0	C	G	G	0.125	5	35	-1.348	2.6692e-08	-
6-phosphogluconate	15442	2R_14020730_INS	FBgn0001222	Hsf	INTRON	0	TAAT	T	T	0.1351	5	32	-1.361	2.76245e-08	(TF_binding_site|BDTNP1_TFBS_dl|FBsf0000302941);(TF_binding_site|BDTNP1_TFBS_Med|FBsf0000280766)
9,10-DiHOME	38399	3L_20433761_SNP	FBgn0264571	CR43943	DOWNSTREAM	98	T	C	C	0.1081	4	33	-0.4893	3.29353e-09	-
9,10-DiHOME	38399	3L_20433761_SNP	FBgn0266686	CR45176	DOWNSTREAM	740	T	C	C	0.1081	4	33	-0.4893	3.29353e-09	-
9,10-DiHOME	38399	3L_20433761_SNP	FBgn0036992	CG11796	UPSTREAM	789	T	C	C	0.1081	4	33	-0.4893	3.29353e-09	-
9,10-DiHOME	38399	3R_23331989_SNP	Intergenic	Intergenic	Intergenic		C	T	T	0.1	4	36	-0.4844	4.55264e-09	-
9,10-DiHOME	38399	3R_23332008_SNP	Intergenic	Intergenic	Intergenic		C	T	T	0.1	4	36	-0.4844	4.55264e-09	-
9,10-DiHOME	38399	3R_23332013_SNP	Intergenic	Intergenic	Intergenic		T	A	A	0.1	4	36	-0.4844	4.55264e-09	-
9,10-DiHOME	38399	2R_19455060_SNP	FBgn0015903	apt	INTRON	0	A	T	A	0.1026	4	35	-0.4805	7.81826e-09	-
adenosine 5'-monophosphate (AMP)	32342	X_5500955_SNP	FBgn0263511	Vsx1	INTRON	0	C	A	A	0.1	4	36	-1.418	1.18545e-09	(TF_binding_site|mE1_TFBS_cad|FBsf0000242875);(TF_binding_site|mE1_TFBS_chinmo|FBsf0000208349)
adenosine 5'-monophosphate (AMP)	32342	3L_14561340_SNP	FBgn0261816	CG42758	DOWNSTREAM	107	T	C	C	0.1081	4	33	-1.412	2.01832e-09	-
adenosine 5'-monophosphate (AMP)	32342	2L_6778523_SNP	FBgn0015776	nrv1	DOWNSTREAM	32	A	G	G	0.125	4	28	-1.423	2.07103e-09	-
adenosine 5'-monophosphate (AMP)	32342	2L_6778523_SNP	FBgn0031858	CG17378	DOWNSTREAM	79	A	G	G	0.125	4	28	-1.423	2.07103e-09	-
adenosine 5'-monophosphate (AMP)	32342	3L_12565203_SNP	FBgn0036302	sowah	SYNONYMOUS_CODING	0	C	T	T	0.1	4	36	-1.384	5.03922e-09	(TF_binding_site|BDTNP1_TFBS_dl|FBsf0000307064);(TF_binding_site|BDTNP1_TFBS_ftz|FBsf0000295305);(TF_binding_site|BDTNP1_TFBS_Med|FBsf0000282902);(TF_binding_site|mE1_TFBS_cad|FBsf0000244853);(TF_binding_site|mE1_TFBS_HSA|FBsf0000364601)
adenosine 5'-monophosphate (AMP)	32342	X_6187519_SNP	FBgn0029859	CG15892	SYNONYMOUS_CODING	0	G	A	A	0.1	4	36	-1.384	5.03922e-09	(TF_binding_site|mE1_TFBS_chinmo|FBsf0000208428);(TF_binding_site|mE1_TFBS_HSA|FBsf0000379810);(TF_binding_site|mE1_TFBS_sens|FBsf0000219827)
adenosine 5'-monophosphate (AMP)	32342	X_6187519_SNP	FBgn0029858	CG15896	DOWNSTREAM	333	G	A	A	0.1	4	36	-1.384	5.03922e-09	(TF_binding_site|mE1_TFBS_chinmo|FBsf0000208428);(TF_binding_site|mE1_TFBS_HSA|FBsf0000379810);(TF_binding_site|mE1_TFBS_sens|FBsf0000219827)
adenosine 5'-monophosphate (AMP)	32342	X_11254177_SNP	FBgn0030294	Pa1	UTR_3_PRIME	0	G	A	A	0.1053	4	34	-1.38	6.85857e-09	-
adenosine 5'-monophosphate (AMP)	32342	X_11254177_SNP	FBgn0004864	hop	DOWNSTREAM	786	G	A	A	0.1053	4	34	-1.38	6.85857e-09	-
adipate	21134	2L_11347480_SNP	Intergenic	Intergenic	Intergenic		A	T	T	0.1053	4	34	-1.178	5.2146e-10	(TF_binding_site|BDTNP1_TFBS_twi|FBsf0000201476)
adipate	21134	3L_7840100_SNP	FBgn0016694	Pdp1	INTRON	0	A	T	T	0.1026	4	35	-1.172	6.5632e-10	(regulatory_region|REDfly_CRMs|FBsf0000435665)
adipate	21134	2L_9654862_SNP	FBgn0032136	Apoltp	SYNONYMOUS_CODING	0	T	C	C	0.1	4	36	-1.166	8.7787e-10	(TF_binding_site|mE1_TFBS_HSA|FBsf0000347141);(TF_binding_site|mE1_TFBS_sens|FBsf0000217001)
adipate	21134	2L_9654879_SNP	FBgn0032136	Apoltp	NON_SYNONYMOUS_CODING	0	A	C	C	0.1	4	36	-1.166	8.7787e-10	(TF_binding_site|mE1_TFBS_HSA|FBsf0000347141);(TF_binding_site|mE1_TFBS_sens|FBsf0000217001)
adipate	21134	2L_9654961_SNP	FBgn0032136	Apoltp	SYNONYMOUS_CODING	0	T	G	G	0.1	4	36	-1.166	8.7787e-10	-
adipate	21134	2L_9655244_SNP	FBgn0032136	Apoltp	SYNONYMOUS_CODING	0	T	G	G	0.1	4	36	-1.166	8.7787e-10	-
adipate	21134	2R_2599149_SNP	FBgn0266525	CG45092	INTRON	0	C	A	A	0.1	4	36	-1.159	1.62847e-09	(TF_binding_site|BDTNP1_TFBS_dl|FBsf0000300302);(TF_binding_site|BDTNP1_TFBS_Med|FBsf0000279384);(TF_binding_site|mE1_TFBS_HSA|FBsf0000353876);(TF_binding_site|mE1_TFBS_sens|FBsf0000226492)
adipate	21134	2R_2599149_SNP	FBgn0033095	CG3409	INTRON	0	C	A	A	0.1	4	36	-1.159	1.62847e-09	(TF_binding_site|BDTNP1_TFBS_dl|FBsf0000300302);(TF_binding_site|BDTNP1_TFBS_Med|FBsf0000279384);(TF_binding_site|mE1_TFBS_HSA|FBsf0000353876);(TF_binding_site|mE1_TFBS_sens|FBsf0000226492)
adipate	21134	2L_9655493_SNP	FBgn0032136	Apoltp	SYNONYMOUS_CODING	0	G	A	A	0.1026	4	35	-1.157	1.63795e-09	-
adipate	21134	X_1685983_SNP	FBgn0261548	CG42666	INTRON	0	C	T	T	0.1053	4	34	-1.157	2.25093e-09	(TF_binding_site|BDTNP1_TFBS_dl|FBsf0000315801);(TF_binding_site|mE1_TFBS_cad|FBsf0000242689)
adipate	21134	3L_11087234_SNP	FBgn0036125	CG6279	NON_SYNONYMOUS_CODING	0	C	G	G	0.1081	4	33	-1.154	2.56437e-09	(TF_binding_site|mE1_TFBS_chinmo|FBsf0000210079)
adipate	21134	3L_11087234_SNP	FBgn0020412	JIL-1	UPSTREAM	941	C	G	G	0.1081	4	33	-1.154	2.56437e-09	(TF_binding_site|mE1_TFBS_chinmo|FBsf0000210079)
adipate	21134	X_1684463_SNP	FBgn0261548	CG42666	INTRON	0	T	A	A	0.1026	4	35	-1.151	2.91442e-09	-
adipate	21134	X_1684463_SNP	FBgn0052806	CG32806	DOWNSTREAM	12	T	A	A	0.1026	4	35	-1.151	2.91442e-09	-
adipate	21134	2L_2330632_INS	FBgn0031414	eys	INTRON	0	GTTTTG	G	G	0.1111	4	32	-1.102	2.27189e-08	-
adipate	21134	2L_2330632_INS	FBgn0031413	CG9967	INTRON	0	GTTTTG	G	G	0.1111	4	32	-1.102	2.27189e-08	-
adipate	21134	2L_1143910_SNP	FBgn0031307	MFS3	INTRON	0	T	A	A	0.1026	4	35	-1.094	2.85323e-08	-
adipate	21134	2L_1143910_SNP	FBgn0267281	CR45717	DOWNSTREAM	694	T	A	A	0.1026	4	35	-1.094	2.85323e-08	-
adipate	21134	2L_1143916_SNP	FBgn0031307	MFS3	INTRON	0	T	C	C	0.1026	4	35	-1.094	2.85323e-08	-
adipate	21134	2L_1143916_SNP	FBgn0267281	CR45717	DOWNSTREAM	700	T	C	C	0.1026	4	35	-1.094	2.85323e-08	-
alanylleucine	37093	3R_17741845_SNP	FBgn0038919	CG17843	DOWNSTREAM	577	C	T	T	0.2564	10	29	-0.9412	2.47944e-09	-
alpha-hydroxyisocaproate	22132	2L_1315109_SNP	Intergenic	Intergenic	Intergenic		T	G	G	0.1053	4	34	-2.536	2.9192e-12	(TF_binding_site|BDTNP1_TFBS_twi|FBsf0000200559)
alpha-hydroxyisocaproate	22132	3R_13643247_SNP	FBgn0261649	tinc	INTRON	0	C	T	T	0.1111	4	32	-2.505	1.3351e-11	-
alpha-hydroxyisocaproate	22132	3R_13643258_SNP	FBgn0261649	tinc	INTRON	0	G	A	A	0.1351	5	32	-2.097	4.42687e-09	-
alpha-hydroxyisocaproate	22132	2L_7451600_DEL	FBgn0025697	santa-maria	UPSTREAM	357	G	GA	GA	0.1316	5	33	-2.057	1.14055e-08	-
alpha-hydroxyisocaproate	22132	2L_7451600_DEL	FBgn0041247	Gr28a	DOWNSTREAM	919	G	GA	GA	0.1316	5	33	-2.057	1.14055e-08	-
alpha-hydroxyisocaproate	22132	2L_7451603_SNP	FBgn0025697	santa-maria	UPSTREAM	359	C	A	A	0.1316	5	33	-2.057	1.14055e-08	-
alpha-hydroxyisocaproate	22132	2L_7451603_SNP	FBgn0041247	Gr28a	DOWNSTREAM	917	C	A	A	0.1316	5	33	-2.057	1.14055e-08	-
alpha-hydroxyisocaproate	22132	2L_2243014_SNP	FBgn0264979	CG4267	INTRON	0	A	C	C	0.1	4	36	-2.253	1.30025e-08	(TF_binding_site|mE1_TFBS_Trl|FBsf0000337070)
alpha-hydroxyisocaproate	22132	2L_2245398_SNP	FBgn0262106	CR42859	EXON	0	G	A	A	0.1	4	36	-2.253	1.30025e-08	-
alpha-hydroxyisocaproate	22132	2L_2245398_SNP	FBgn0264979	CG4267	DOWNSTREAM	124	G	A	A	0.1	4	36	-2.253	1.30025e-08	-
alpha-hydroxyisocaproate	22132	2L_2245523_INS	FBgn0262106	CR42859	INTRON	0	ACA	A	A	0.1	4	36	-2.253	1.30025e-08	-
alpha-hydroxyisocaproate	22132	2L_2245523_INS	FBgn0264979	CG4267	DOWNSTREAM	250	ACA	A	A	0.1	4	36	-2.253	1.30025e-08	-
alpha-hydroxyisocaproate	22132	2L_2245724_SNP	FBgn0262106	CR42859	EXON	0	A	T	T	0.1	4	36	-2.253	1.30025e-08	-
alpha-hydroxyisocaproate	22132	2L_2245724_SNP	FBgn0264979	CG4267	DOWNSTREAM	450	A	T	T	0.1	4	36	-2.253	1.30025e-08	-
alpha-hydroxyisocaproate	22132	2L_7451604_DEL	FBgn0025697	santa-maria	UPSTREAM	361	T	TAAAAATGAAATGAA	TAAAAATGAAATGAA	0.1282	5	34	-2.047	1.31187e-08	-
alpha-hydroxyisocaproate	22132	2L_7451604_DEL	FBgn0041247	Gr28a	DOWNSTREAM	915	T	TAAAAATGAAATGAA	TAAAAATGAAATGAA	0.1282	5	34	-2.047	1.31187e-08	-
alpha-hydroxyisocaproate	22132	2L_7451630_SNP	FBgn0025697	santa-maria	UPSTREAM	386	G	A	A	0.1282	5	34	-2.047	1.31187e-08	(TF_binding_site|BDTNP1_TFBS_ftz|FBsf0000295076)
alpha-hydroxyisocaproate	22132	2L_7451630_SNP	FBgn0041247	Gr28a	DOWNSTREAM	890	G	A	A	0.1282	5	34	-2.047	1.31187e-08	(TF_binding_site|BDTNP1_TFBS_ftz|FBsf0000295076)
alpha-hydroxyisocaproate	22132	2L_7451584_SNP	FBgn0025697	santa-maria	UPSTREAM	340	T	C	C	0.1351	5	32	-2.055	1.32545e-08	-
alpha-hydroxyisocaproate	22132	2L_7451584_SNP	FBgn0041247	Gr28a	DOWNSTREAM	936	T	C	C	0.1351	5	32	-2.055	1.32545e-08	-
alpha-hydroxyisocaproate	22132	2L_7359146_SNP	Intergenic	Intergenic	Intergenic		A	G	G	0.1081	4	33	-2.242	2.14618e-08	(TF_binding_site|mE1_TFBS_HSA|FBsf0000346408);(TF_binding_site|mE1_TFBS_sens|FBsf0000216612)
alpha-hydroxyisocaproate	22132	2L_3667878_SNP	FBgn0085369	CG34340	INTRON	0	T	A	A	0.1282	5	34	-2.026	2.26249e-08	-
alpha-hydroxyisocaproate	22132	2L_3667878_SNP	FBgn0259951	Sfp24Ba	DOWNSTREAM	99	T	A	A	0.1282	5	34	-2.026	2.26249e-08	-
alpha-hydroxyisocaproate	22132	2L_3667878_SNP	FBgn0259953	CG42463	DOWNSTREAM	813	T	A	A	0.1282	5	34	-2.026	2.26249e-08	-
alpha-hydroxyisocaproate	22132	2L_2585493_SNP	FBgn0026479	Drp1	UPSTREAM	63	A	G	G	0.1622	6	31	-1.882	2.56895e-08	(TF_binding_site|BDTNP1_TFBS_dl|FBsf0000296240);(TF_binding_site|BDTNP1_TFBS_Med|FBsf0000277310);(TF_binding_site|mE1_TFBS_cad|FBsf0000241177);(TF_binding_site|mE1_TFBS_D|FBsf0000237833);(TF_binding_site|mE1_TFBS_HSA|FBsf0000344707)
alpha-hydroxyisovalerate	46537	2L_7359146_SNP	Intergenic	Intergenic	Intergenic		A	G	G	0.1081	4	33	-1.353	1.2135e-12	(TF_binding_site|mE1_TFBS_HSA|FBsf0000346408);(TF_binding_site|mE1_TFBS_sens|FBsf0000216612)
alpha-hydroxyisovalerate	46537	3R_17409410_INS	FBgn0013984	InR	INTRON	0	ATCAGAGA	A	A	0.1081	4	33	-1.194	3.44843e-09	(TF_binding_site|BDTNP1_TFBS_dl|FBsf0000313217);(TF_binding_site|mE1_TFBS_bab1|FBsf0000214796);(TF_binding_site|mE1_TFBS_cad|FBsf0000248945);(TF_binding_site|mE1_TFBS_HSA|FBsf0000373843);(TF_binding_site|mE1_TFBS_Trl|FBsf0000341475)
alpha-hydroxyisovalerate	46537	2L_1315109_SNP	Intergenic	Intergenic	Intergenic		T	G	G	0.1053	4	34	-1.275	4.13498e-09	(TF_binding_site|BDTNP1_TFBS_twi|FBsf0000200559)
alpha-hydroxyisovalerate	46537	2R_14721107_INS	FBgn0034398	CG15098	UTR_3_PRIME	0	A	AA	A	0.1176	4	30	-1.281	4.54414e-09	-
alpha-hydroxyisovalerate	46537	2R_14721107_INS	FBgn0034397	CG15082	DOWNSTREAM	362	A	AA	A	0.1176	4	30	-1.281	4.54414e-09	-
arabitol/xylitol	48885	3R_15738731_SNP	FBgn0038747	RhoGAP92B	SYNONYMOUS_CODING	0	A	G	G	0.1026	4	35	-0.3258	7.37951e-09	(TF_binding_site|mE1_TFBS_cad|FBsf0000248802)
arabitol/xylitol	48885	3R_15738225_SNP	FBgn0038747	RhoGAP92B	SYNONYMOUS_CODING	0	C	T	T	0.1026	4	35	-0.3242	8.18087e-09	(TF_binding_site|mE1_TFBS_cad|FBsf0000248802)
arabitol/xylitol	48885	3R_15738221_SNP	FBgn0038747	RhoGAP92B	SYNONYMOUS_CODING	0	C	G	G	0.1053	4	34	-0.3216	9.87761e-09	(TF_binding_site|mE1_TFBS_cad|FBsf0000248802)
arabitol/xylitol	48885	3R_15737204_SNP	FBgn0038747	RhoGAP92B	NON_SYNONYMOUS_CODING	0	G	A	A	0.1	4	36	-0.3215	1.33238e-08	-
arabitol/xylitol	48885	3R_15737445_SNP	FBgn0038747	RhoGAP92B	SYNONYMOUS_CODING	0	A	G	G	0.1	4	36	-0.3215	1.33238e-08	-
arabitol/xylitol	48885	3R_15737690_SNP	FBgn0038747	RhoGAP92B	INTRON	0	T	C	C	0.1	4	36	-0.3215	1.33238e-08	-
arabitol/xylitol	48885	3R_15737973_SNP	FBgn0038747	RhoGAP92B	INTRON	0	A	G	G	0.1026	4	35	-0.3192	2.0759e-08	(TF_binding_site|mE1_TFBS_cad|FBsf0000248802)
argininosuccinate	15497	3R_21500512_SNP	FBgn0039354	Lgr3	INTRON	0	C	T	T	0.1	4	36	-0.6309	2.10229e-08	-
argininosuccinate	15497	3R_21500512_SNP	FBgn0266752	CR45225	DOWNSTREAM	987	C	T	T	0.1	4	36	-0.6309	2.10229e-08	-
citrulline	2132	3R_13018317_SNP	FBgn0038492	Mur89F	INTRON	0	C	T	C	0.1	4	36	-1.312	5.46075e-09	-
citrulline	2132	X_14904027_SNP	FBgn0000535	eag	DOWNSTREAM	5	T	A	A	0.1282	5	34	-1.177	5.65081e-09	(TF_binding_site|BDTNP1_TFBS_dl|FBsf0000319130)
citrulline	2132	X_14904027_SNP	FBgn0030600	hiw	DOWNSTREAM	143	T	A	A	0.1282	5	34	-1.177	5.65081e-09	(TF_binding_site|BDTNP1_TFBS_dl|FBsf0000319130)
citrulline	2132	X_9283531_MNP	FBgn0261260	mgl	INTRON	0	GAG	AGC	AGC	0.1282	5	34	-1.18	1.21253e-08	-
citrulline	2132	2L_1286899_SNP	FBgn0041097	robo3	NON_SYNONYMOUS_CODING	0	A	G	G	0.1282	5	34	-1.172	1.63549e-08	-
citrulline	2132	3R_6372864_SNP	FBgn0001235	hth	INTRON	0	T	C	C	0.1111	4	32	-1.286	2.37728e-08	(TF_binding_site|BDTNP1_TFBS_da|FBsf0000328804);(TF_binding_site|BDTNP1_TFBS_dl|FBsf0000310929);(TF_binding_site|BDTNP1_TFBS_twi|FBsf0000264660);(TF_binding_site|mE1_TFBS_HSA|FBsf0000370316)
citrulline	2132	3R_10833265_SNP	Intergenic	Intergenic	Intergenic		C	T	T	0.1053	4	34	-1.26	2.62702e-08	-
dihydoxyphenylalanine (L-DOPA)	1576	X_12637134_SNP	FBgn0267183	CR45623	DOWNSTREAM	175	G	C	C	0.1176	4	30	-0.7991	3.2865e-10	(TF_binding_site|BDTNP1_TFBS_da|FBsf0000332494);(TF_binding_site|BDTNP1_TFBS_dl|FBsf0000318673);(TF_binding_site|BDTNP1_TFBS_Med|FBsf0000288547);(TF_binding_site|BDTNP1_TFBS_twi|FBsf0000205831);(TF_binding_site|mE1_TFBS_HSA|FBsf0000381934);(TF_binding_site|mE1_TFBS_HSA|FBsf0000381935)
dihydoxyphenylalanine (L-DOPA)	1576	X_12637134_SNP	FBgn0265523	Smr	UPSTREAM	483	G	C	C	0.1176	4	30	-0.7991	3.2865e-10	(TF_binding_site|BDTNP1_TFBS_da|FBsf0000332494);(TF_binding_site|BDTNP1_TFBS_dl|FBsf0000318673);(TF_binding_site|BDTNP1_TFBS_Med|FBsf0000288547);(TF_binding_site|BDTNP1_TFBS_twi|FBsf0000205831);(TF_binding_site|mE1_TFBS_HSA|FBsf0000381934);(TF_binding_site|mE1_TFBS_HSA|FBsf0000381935)
dihydoxyphenylalanine (L-DOPA)	1576	2R_17028512_SNP	FBgn0034590	Magi	INTRON	0	C	A	A	0.1081	4	33	-0.7761	1.15861e-09	(TF_binding_site|BDTNP1_TFBS_da|FBsf0000324983);(TF_binding_site|BDTNP1_TFBS_dl|FBsf0000303617);(TF_binding_site|BDTNP1_TFBS_sna|FBsf0000267973);(TF_binding_site|mE1_TFBS_D|FBsf0000240853);(TF_binding_site|mE1_TFBS_HSA|FBsf0000358966);(TF_binding_site|mE1_TFBS_sens|FBsf0000229152)
dihydoxyphenylalanine (L-DOPA)	1576	3R_13643247_SNP	FBgn0261649	tinc	INTRON	0	C	T	T	0.1111	4	32	-0.761	2.77155e-09	-
dihydoxyphenylalanine (L-DOPA)	1576	3R_8194770_SNP	FBgn0001149	GstD1	INTRON	0	G	C	C	0.1026	4	35	-0.7546	3.03651e-09	(TF_binding_site|BDTNP1_TFBS_dl|FBsf0000311290);(TF_binding_site|mE1_TFBS_HSA|FBsf0000370930);(TF_binding_site|mE1_TFBS_Trl|FBsf0000340943)
dihydoxyphenylalanine (L-DOPA)	1576	3R_25968658_SNP	FBgn0039747	AdoR	INTRON	0	A	G	G	0.1111	4	32	-0.7588	4.36726e-09	-
dihydoxyphenylalanine (L-DOPA)	1576	3R_17662131_SNP	Intergenic	Intergenic	Intergenic		T	C	C	0.1026	4	35	-0.7526	5.09458e-09	(TF_binding_site|BDTNP1_TFBS_dl|FBsf0000313296)
dihydoxyphenylalanine (L-DOPA)	1576	X_5754992_SNP	Intergenic	Intergenic	Intergenic		T	C	T	0.1	4	36	-0.7223	2.17098e-08	(TF_binding_site|mE1_TFBS_cad|FBsf0000242897)
dihydoxyphenylalanine (L-DOPA)	1576	X_5754993_SNP	Intergenic	Intergenic	Intergenic		T	C	T	0.1	4	36	-0.7223	2.17098e-08	(TF_binding_site|mE1_TFBS_cad|FBsf0000242897)
dihydroxyacetone phosphate (DHAP)	15522	3L_12199028_SNP	FBgn0036266	CG5626	INTRON	0	T	C	C	0.125	5	35	-0.8226	5.7416e-10	(TF_binding_site|mE1_TFBS_zfh1|FBsf0000334817)
dihydroxyacetone phosphate (DHAP)	15522	3L_12199028_SNP	FBgn0260941	app	DOWNSTREAM	310	T	C	C	0.125	5	35	-0.8226	5.7416e-10	(TF_binding_site|mE1_TFBS_zfh1|FBsf0000334817)
dihydroxyacetone phosphate (DHAP)	15522	3L_12199189_SNP	FBgn0036266	CG5626	UPSTREAM	67	T	G	G	0.125	5	35	-0.8226	5.7416e-10	(TF_binding_site|mE1_TFBS_HSA|FBsf0000364483);(TF_binding_site|mE1_TFBS_zfh1|FBsf0000334817)
dihydroxyacetone phosphate (DHAP)	15522	3L_12199189_SNP	FBgn0260941	app	DOWNSTREAM	149	T	G	G	0.125	5	35	-0.8226	5.7416e-10	(TF_binding_site|mE1_TFBS_HSA|FBsf0000364483);(TF_binding_site|mE1_TFBS_zfh1|FBsf0000334817)
dodecanedioate	32388	2R_18583748_SNP	FBgn0005631	robo	NON_SYNONYMOUS_CODING	0	A	G	G	0.1282	5	34	-0.9128	1.24445e-08	(TF_binding_site|mE1_TFBS_HSA|FBsf0000359519)
dodecanedioate	32388	2R_4907765_SNP	FBgn0033365	CG8170	SYNONYMOUS_CODING	0	A	T	T	0.1026	4	35	-1.004	1.62909e-08	(TF_binding_site|BDTNP1_TFBS_sna|FBsf0000267555);(TF_binding_site|mE1_TFBS_chinmo|FBsf0000210955);(TF_binding_site|mE1_TFBS_HSA|FBsf0000354769);(TF_binding_site|mE1_TFBS_HSA|FBsf0000354770)
dodecanedioate	32388	3L_11363661_SNP	Intergenic	Intergenic	Intergenic		T	A	A	0.1026	4	35	-0.9928	2.83854e-08	-
dodecanedioate	32388	2R_18583713_SNP	FBgn0005631	robo	SYNONYMOUS_CODING	0	T	G	G	0.1026	4	35	-0.9837	2.99944e-08	(TF_binding_site|mE1_TFBS_HSA|FBsf0000359519)
ergothioneine	37459	3L_12610139_SNP	FBgn0015919	caup	SYNONYMOUS_CODING	0	T	C	T	0.1053	4	34	-0.7275	4.11854e-09	(TF_binding_site|BDTNP1_TFBS_da|FBsf0000326795);(TF_binding_site|mE1_TFBS_cad|FBsf0000244859);(TF_binding_site|mE1_TFBS_chinmo|FBsf0000210166);(TF_binding_site|mE1_TFBS_HSA|FBsf0000364621)
ergothioneine	37459	2L_1548997_SNP	Intergenic	Intergenic	Intergenic		A	G	G	0.1	4	36	-0.7184	7.29272e-09	-
ergothioneine	37459	2R_1711923_SNP	FBgn0085414	dpr12	INTRON	0	G	A	A	0.1	4	36	-0.7184	7.29272e-09	-
ergothioneine	37459	3R_16410589_SNP	FBgn0038809	CG16953	INTRON	0	A	T	T	0.1	4	36	-0.7184	7.29272e-09	-
ergothioneine	37459	3R_16410656_SNP	FBgn0038809	CG16953	INTRON	0	T	G	G	0.1026	4	35	-0.7166	9.07663e-09	-
ergothioneine	37459	2R_1064893_SNP	FBgn0053554	Nipped-A	DOWNSTREAM	577	T	C	C	0.1111	4	32	-0.71	1.88509e-08	(transposable_element|FlyBase|FBti0061094)
erythronate*	42420	2L_1315109_SNP	Intergenic	Intergenic	Intergenic		T	G	G	0.1053	4	34	-0.5024	2.2747e-11	(TF_binding_site|BDTNP1_TFBS_twi|FBsf0000200559)
erythronate*	42420	3R_13643247_SNP	FBgn0261649	tinc	INTRON	0	C	T	T	0.1111	4	32	-0.4698	1.9004e-09	-
erythronate*	42420	2L_3667878_SNP	FBgn0085369	CG34340	INTRON	0	T	A	A	0.1282	5	34	-0.422	2.62558e-09	-
erythronate*	42420	2L_3667878_SNP	FBgn0259951	Sfp24Ba	DOWNSTREAM	99	T	A	A	0.1282	5	34	-0.422	2.62558e-09	-
erythronate*	42420	2L_3667878_SNP	FBgn0259953	CG42463	DOWNSTREAM	813	T	A	A	0.1282	5	34	-0.422	2.62558e-09	-
erythronate*	42420	2L_2345253_SNP	FBgn0031413	CG9967	INTRON	0	G	T	T	0.1316	5	33	-0.4055	1.85642e-08	-
erythronate*	42420	2L_2345253_SNP	FBgn0031414	eys	INTRON	0	G	T	T	0.1316	5	33	-0.4055	1.85642e-08	-
erythronate*	42420	2L_8611037_SNP	FBgn0011259	Sema-1a	INTRON	0	T	C	C	0.1026	4	35	-0.4437	2.24611e-08	(TF_binding_site|mE1_TFBS_sens|FBsf0000216856)
erythronate*	42420	2L_2237999_SNP	FBgn0051679	Tengl3	INTRON	0	T	A	A	0.1026	4	35	-0.4435	2.9548e-08	-
erythronate*	42420	2L_2237999_SNP	FBgn0052463	Tengl2	DOWNSTREAM	305	T	A	A	0.1026	4	35	-0.4435	2.9548e-08	-
erythronate*	42420	2L_2237999_SNP	FBgn0264946	CR44115	DOWNSTREAM	977	T	A	A	0.1026	4	35	-0.4435	2.9548e-08	-
ethylmalonate	15765	2L_5704337_DEL	Intergenic	Intergenic	Intergenic		A	ACTGCAG	ACTGCAG	0.175	7	33	-0.7219	2.0009e-11	-
ethylmalonate	15765	3R_20569142_SNP	FBgn0004885	tok	SYNONYMOUS_CODING	0	A	G	G	0.125	5	35	-0.822	6.7329e-11	-
ethylmalonate	15765	2L_9562866_INS	FBgn0032129	jp	INTRON	0	ATA	A	A	0.1026	4	35	-0.9015	1.3239e-10	-
ethylmalonate	15765	2L_1407437_SNP	FBgn0002543	lea	INTRON	0	T	C	C	0.1	4	36	-0.8976	1.658e-10	(TF_binding_site|BDTNP1_TFBS_da|FBsf0000321045);(TF_binding_site|BDTNP1_TFBS_twi|FBsf0000200565);(TF_binding_site|mE1_TFBS_cad|FBsf0000241104);(TF_binding_site|mE1_TFBS_HSA|FBsf0000344354)
ethylmalonate	15765	3L_419910_SNP	Intergenic	Intergenic	Intergenic		A	G	G	0.1	4	36	-0.8976	1.658e-10	(TF_binding_site|mE1_TFBS_Kr|FBsf0000253474)
ethylmalonate	15765	X_21291259_SNP	Intergenic	Intergenic	Intergenic		G	C	C	0.1026	4	35	-0.8924	2.9501e-10	-
ethylmalonate	15765	3L_420454_SNP	Intergenic	Intergenic	Intergenic		T	A	A	0.15	6	34	-0.7142	6.65205e-09	-
ethylmalonate	15765	X_10277866_INS	FBgn0030196	Psf3	DOWNSTREAM	37	ACGAA	A	A	0.2647	9	25	-0.6206	8.52178e-09	-
ethylmalonate	15765	X_10277866_INS	FBgn0028480	CG17841	DOWNSTREAM	254	ACGAA	A	A	0.2647	9	25	-0.6206	8.52178e-09	-
ethylmalonate	15765	X_2268978_SNP	FBgn0264598	PsGEF	SYNONYMOUS_CODING	0	G	A	A	0.1892	7	30	-0.6728	9.42802e-09	(TF_binding_site|mE1_TFBS_chinmo|FBsf0000208186)
ethylmalonate	15765	3L_17706139_SNP	FBgn0052183	Ccn	INTRON	0	C	T	C	0.2162	8	29	-0.6303	1.69319e-08	-
ethylmalonate	15765	X_2276870_SNP	FBgn0264598	PsGEF	INTRON	0	T	G	G	0.1282	5	34	-0.7599	1.80731e-08	(TF_binding_site|BDTNP1_TFBS_dl|FBsf0000316047);(TF_binding_site|mE1_TFBS_HSA|FBsf0000378524)
ethylmalonate	15765	X_2277122_SNP	FBgn0264598	PsGEF	INTRON	0	G	A	A	0.1282	5	34	-0.7599	1.80731e-08	(TF_binding_site|BDTNP1_TFBS_dl|FBsf0000316047);(TF_binding_site|mE1_TFBS_hkb|FBsf0000255949);(TF_binding_site|mE1_TFBS_HSA|FBsf0000378524)
ethylmalonate	15765	X_2278084_SNP	FBgn0264598	PsGEF	INTRON	0	C	G	G	0.1282	5	34	-0.7599	1.80731e-08	(TF_binding_site|BDTNP1_TFBS_sna|FBsf0000269833);(TF_binding_site|mE1_TFBS_HSA|FBsf0000378525)
ethylmalonate	15765	X_2278702_SNP	FBgn0264598	PsGEF	INTRON	0	C	G	G	0.1282	5	34	-0.7599	1.80731e-08	(TF_binding_site|BDTNP1_TFBS_sna|FBsf0000269833);(TF_binding_site|mE1_TFBS_HSA|FBsf0000378525)
ethylmalonate	15765	X_2278767_SNP	FBgn0264598	PsGEF	INTRON	0	G	A	A	0.1282	5	34	-0.7599	1.80731e-08	(TF_binding_site|BDTNP1_TFBS_sna|FBsf0000269833);(TF_binding_site|mE1_TFBS_cad|FBsf0000242751);(TF_binding_site|mE1_TFBS_HSA|FBsf0000378525)
gamma-glutamylmethionine	44872	2L_3999879_DEL	FBgn0264341	CG43797	UPSTREAM	138	A	AATCTAT	AATCTAT	0.1	4	36	-1.284	1.12408e-08	-
gamma-glutamylmethionine	44872	2L_3999878_SNP	FBgn0264341	CG43797	UPSTREAM	140	G	A	A	0.1026	4	35	-1.281	1.39679e-08	-
gamma-glutamylmethionine	44872	3R_20328016_SNP	Intergenic	Intergenic	Intergenic		A	G	A	0.1081	4	33	-1.281	1.60974e-08	(TF_binding_site|mE1_TFBS_inv|FBsf0000237521)
gamma-glutamylmethionine	44872	2L_4081661_SNP	FBgn0000547	ed	INTRON	0	G	A	A	0.1026	4	35	-1.272	2.00566e-08	(TF_binding_site|BDTNP1_TFBS_dl|FBsf0000296552);(TF_binding_site|mE1_TFBS_HSA|FBsf0000345172)
glycerate	1572	3L_14665406_SNP	FBgn0262581	CG43121	NON_SYNONYMOUS_CODING	0	G	A	A	0.2105	8	30	-0.3373	8.15256e-09	(TF_binding_site|mE1_TFBS_bab1|FBsf0000214512)
glycerate	1572	3L_14665406_SNP	FBgn0259175	ome	UPSTREAM	533	G	A	A	0.2105	8	30	-0.3373	8.15256e-09	(TF_binding_site|mE1_TFBS_bab1|FBsf0000214512)
glycerate	1572	3L_14665406_SNP	FBgn0041604	dlp	DOWNSTREAM	697	G	A	A	0.2105	8	30	-0.3373	8.15256e-09	(TF_binding_site|mE1_TFBS_bab1|FBsf0000214512)
glycerol	15122	3R_7786694_SNP	FBgn0260741	CG3281	UTR_3_PRIME	0	A	T	T	0.1944	7	29	-0.162	7.02101e-09	(TF_binding_site|mE1_TFBS_chinmo|FBsf0000212550)
glycerol	15122	3R_7786694_SNP	FBgn0013276	Hsp70Ab	DOWNSTREAM	63	A	T	T	0.1944	7	29	-0.162	7.02101e-09	(TF_binding_site|mE1_TFBS_chinmo|FBsf0000212550)
glycerol	15122	X_16443395_SNP	FBgn0011742	Arp2	SYNONYMOUS_CODING	0	G	A	A	0.15	6	34	-0.1653	2.32937e-08	-
glycerol 3-phosphate	43847	2L_9722291_SNP	FBgn0028704	Nckx30C	INTRON	0	A	G	A	0.1	4	36	-0.4611	8.4398e-10	-
glycerol 3-phosphate	43847	2L_12699899_SNP	FBgn0032449	CG17036	NON_SYNONYMOUS_CODING	0	C	T	T	0.1282	5	34	-0.4123	2.18357e-09	(TF_binding_site|BDTNP1_TFBS_da|FBsf0000322297);(TF_binding_site|mE1_TFBS_cad|FBsf0000241991);(TF_binding_site|mE1_TFBS_chinmo|FBsf0000207638);(TF_binding_site|mE1_TFBS_HSA|FBsf0000350627);(TF_binding_site|mE1_TFBS_inv|FBsf0000234896);(TF_binding_site|mE1_TFBS_sens|FBsf0000217453)
glycerol 3-phosphate	43847	2L_12699899_SNP	FBgn0032447	PICK1	DOWNSTREAM	982	C	T	T	0.1282	5	34	-0.4123	2.18357e-09	(TF_binding_site|BDTNP1_TFBS_da|FBsf0000322297);(TF_binding_site|mE1_TFBS_cad|FBsf0000241991);(TF_binding_site|mE1_TFBS_chinmo|FBsf0000207638);(TF_binding_site|mE1_TFBS_HSA|FBsf0000350627);(TF_binding_site|mE1_TFBS_inv|FBsf0000234896);(TF_binding_site|mE1_TFBS_sens|FBsf0000217453)
glycerol 3-phosphate	43847	2L_16525244_SNP	FBgn0032587	CG5953	INTRON	0	A	G	G	0.125	5	35	-0.4117	2.24851e-09	-
glycerol 3-phosphate	43847	2L_8918550_SNP	FBgn0085427	CG34398	INTRON	0	A	T	T	0.1212	4	29	-0.4574	3.60501e-09	-
glycerol 3-phosphate	43847	2L_8912423_SNP	FBgn0085427	CG34398	INTRON	0	A	T	T	0.1111	4	32	-0.4542	3.79076e-09	-
glycerol 3-phosphate	43847	2L_8912424_SNP	FBgn0085427	CG34398	INTRON	0	C	T	T	0.1081	4	33	-0.4515	4.68813e-09	-
glycerol 3-phosphate	43847	2L_8918546_SNP	FBgn0085427	CG34398	INTRON	0	A	G	G	0.1081	4	33	-0.4515	4.68813e-09	-
glycerol 3-phosphate	43847	2L_8918559_SNP	FBgn0085427	CG34398	INTRON	0	A	T	T	0.1081	4	33	-0.4515	4.68813e-09	-
glycerol 3-phosphate	43847	3R_7786685_DEL	FBgn0260741	CG3281	UTR_3_PRIME	0	A	AC	AC	0.1714	6	29	-0.3838	5.18433e-09	(TF_binding_site|mE1_TFBS_chinmo|FBsf0000212550)
glycerol 3-phosphate	43847	3R_7786685_DEL	FBgn0013276	Hsp70Ab	DOWNSTREAM	55	A	AC	AC	0.1714	6	29	-0.3838	5.18433e-09	(TF_binding_site|mE1_TFBS_chinmo|FBsf0000212550)
glycerol 3-phosphate	43847	3L_109580_SNP	Intergenic	Intergenic	Intergenic		A	G	G	0.2105	8	30	-0.3352	9.48092e-09	-
glycerol 3-phosphate	43847	3L_64151_SNP	Intergenic	Intergenic	Intergenic		T	A	A	0.2051	8	31	-0.3313	1.42636e-08	-
glycerol 3-phosphate	43847	3L_81572_SNP	Intergenic	Intergenic	Intergenic		G	A	A	0.2051	8	31	-0.3313	1.42636e-08	-
glycerol 3-phosphate	43847	3L_82089_SNP	Intergenic	Intergenic	Intergenic		G	C	C	0.2105	8	30	-0.3309	1.61575e-08	-
hypoxanthine	3127	3L_6976528_SNP	FBgn0250849	CG32388	DOWNSTREAM	45	T	G	G	0.1282	5	34	-0.7352	1.27158e-09	(TF_binding_site|mE1_TFBS_sens|FBsf0000223296)
hypoxanthine	3127	3L_6976528_SNP	FBgn0263387	CG43439	DOWNSTREAM	45	T	G	G	0.1282	5	34	-0.7352	1.27158e-09	(TF_binding_site|mE1_TFBS_sens|FBsf0000223296)
hypoxanthine	3127	3L_21939591_SNP	FBgn0037142	CG14562	INTRON	0	G	A	A	0.1351	5	32	-0.7049	1.80113e-08	-
hypoxanthine	3127	2L_2350098_DEL	FBgn0031414	eys	INTRON	0	G	GA	GA	0.2	8	32	-0.561	2.05292e-08	-
hypoxanthine	3127	2L_2350098_DEL	FBgn0031413	CG9967	INTRON	0	G	GA	GA	0.2	8	32	-0.561	2.05292e-08	-
hypoxanthine	3127	2L_2350518_SNP	FBgn0031413	CG9967	INTRON	0	C	G	G	0.2	8	32	-0.561	2.05292e-08	-
hypoxanthine	3127	2L_2350518_SNP	FBgn0031414	eys	INTRON	0	C	G	G	0.2	8	32	-0.561	2.05292e-08	-
hypoxanthine	3127	2L_7778600_SNP	FBgn0020880	CG7179	UPSTREAM	571	A	G	G	0.1026	4	35	-0.7699	2.3003e-08	-
hypoxanthine	3127	3L_8584163_SNP	FBgn0262508	CG43078	INTRON	0	G	A	A	0.1	4	36	-0.7663	2.71089e-08	(TF_binding_site|mE1_TFBS_chinmo|FBsf0000209983);(TF_binding_site|mE1_TFBS_HSA|FBsf0000363363)
hypoxanthine	3127	3R_13643247_SNP	FBgn0261649	tinc	INTRON	0	C	T	T	0.1111	4	32	-0.7366	2.71706e-08	-
inositol 1-phosphate (I1P)	43849	X_10378478_SNP	FBgn0052687	CG32687	INTRON	0	A	G	G	0.2308	9	30	-0.2495	2.33502e-08	-
Isobar: fructose 1,6-diphosphate, glucose 1,6-diphosphate, myo-inositol 1,4 or 1,3-diphosphate	46896	3L_4437843_SNP	FBgn0035544	CG15021	SYNONYMOUS_CODING	0	G	A	A	0.1053	4	34	-1.182	2.3421e-10	(TF_binding_site|mE1_TFBS_cad|FBsf0000244231)
Isobar: fructose 1,6-diphosphate, glucose 1,6-diphosphate, myo-inositol 1,4 or 1,3-diphosphate	46896	3L_4391057_SNP	FBgn0035539	slow	SYNONYMOUS_CODING	0	C	T	T	0.1	4	36	-1.177	2.5706e-10	(TF_binding_site|mE1_TFBS_cad|FBsf0000244226);(TF_binding_site|mE1_TFBS_HSA|FBsf0000362120)
lactosyl-N-palmitoyl-sphingosine	53010	2L_7773542_SNP	FBgn0031945	CG7191	SYNONYMOUS_CODING	0	T	C	C	0.1026	4	35	-0.5605	9.90507e-09	-
lactosyl-N-palmitoyl-sphingosine	53010	2L_7772902_SNP	FBgn0031945	CG7191	INTRON	0	G	A	A	0.1	4	36	-0.5615	1.11031e-08	-
lactosyl-N-palmitoyl-sphingosine	53010	2L_7773521_SNP	FBgn0031945	CG7191	SYNONYMOUS_CODING	0	C	T	T	0.1	4	36	-0.5615	1.11031e-08	-
lactosyl-N-palmitoyl-sphingosine	53010	3L_7272771_SNP	FBgn0035756	unc-13-4A	INTRON	0	T	C	C	0.1316	5	33	-0.5074	1.15985e-08	-
lactosyl-N-palmitoyl-sphingosine	53010	2L_3531310_SNP	FBgn0031550	Che-13	SYNONYMOUS_CODING	0	T	C	C	0.1282	5	34	-0.5046	1.17249e-08	-
lactosyl-N-palmitoyl-sphingosine	53010	2L_3531310_SNP	FBgn0031549	Spindly	UPSTREAM	993	T	C	C	0.1282	5	34	-0.5046	1.17249e-08	-
lactosyl-N-palmitoyl-sphingosine	53010	X_17260089_SNP	Intergenic	Intergenic	Intergenic		C	G	G	0.1026	4	35	-0.5557	1.20504e-08	(TF_binding_site|mE1_TFBS_cnc|FBsf0000206824);(TF_binding_site|mE1_TFBS_HSA|FBsf0000348844)
leucylalanine	40010	2L_10557400_SNP	FBgn0051721	Trim9	INTRON	0	A	G	A	0.125	5	35	-2.061	8.4311e-12	(TF_binding_site|mE1_TFBS_inv|FBsf0000234840)
leucylalanine	40010	2R_13721697_DEL	FBgn0259211	grh	INTRON	0	T	TTCACTTGGCT	TTCACTTGGCT	0.1515	5	28	-2.044	8.6899e-11	-
leucylalanine	40010	2R_19428955_SNP	FBgn0041233	Gr59e	INTRON	0	G	A	A	0.1	4	36	-2.206	1.0707e-10	(TF_binding_site|mE1_TFBS_cad|FBsf0000247349)
leucylalanine	40010	2R_19428955_SNP	FBgn0050181	ppk3	UPSTREAM	659	G	A	A	0.1	4	36	-2.206	1.0707e-10	(TF_binding_site|mE1_TFBS_cad|FBsf0000247349)
leucylalanine	40010	2R_19428958_SNP	FBgn0041233	Gr59e	INTRON	0	G	A	A	0.1	4	36	-2.206	1.0707e-10	(TF_binding_site|mE1_TFBS_cad|FBsf0000247349)
leucylalanine	40010	2R_19428958_SNP	FBgn0050181	ppk3	UPSTREAM	662	G	A	A	0.1	4	36	-2.206	1.0707e-10	(TF_binding_site|mE1_TFBS_cad|FBsf0000247349)
leucylalanine	40010	2R_19426870_SNP	FBgn0050181	ppk3	INTRON	0	T	G	G	0.1026	4	35	-2.206	1.2082e-10	(TF_binding_site|BDTNP1_TFBS_da|FBsf0000325250);(TF_binding_site|mE1_TFBS_cad|FBsf0000247349);(TF_binding_site|mE1_TFBS_chinmo|FBsf0000211907);(TF_binding_site|mE1_TFBS_HSA|FBsf0000359815)
leucylalanine	40010	2R_19426870_SNP	FBgn0000241	bw	UPSTREAM	848	T	G	G	0.1026	4	35	-2.206	1.2082e-10	(TF_binding_site|BDTNP1_TFBS_da|FBsf0000325250);(TF_binding_site|mE1_TFBS_cad|FBsf0000247349);(TF_binding_site|mE1_TFBS_chinmo|FBsf0000211907);(TF_binding_site|mE1_TFBS_HSA|FBsf0000359815)
leucylalanine	40010	3R_14281797_SNP	FBgn0004652	fru	INTRON	0	C	G	G	0.1053	4	34	-2.159	6.493e-10	-
leucylalanine	40010	3R_20822204_DEL	FBgn0039257	tnc	INTRON	0	T	TAATCCA	TAATCCA	0.1	4	36	-2.127	1.43752e-09	(TF_binding_site|mE1_TFBS_chinmo|FBsf0000213324);(TF_binding_site|mE1_TFBS_inv|FBsf0000237534)
leucylalanine	40010	2R_17671195_SNP	Intergenic	Intergenic	Intergenic		A	T	T	0.1351	5	32	-1.939	1.52195e-09	-
leucylalanine	40010	2R_17671196_SNP	Intergenic	Intergenic	Intergenic		A	T	T	0.1351	5	32	-1.939	1.52195e-09	-
leucylalanine	40010	3R_20822211_INS	FBgn0039257	tnc	INTRON	0	GAACTGGAT	G	G	0.1026	4	35	-2.116	2.16267e-09	(TF_binding_site|mE1_TFBS_chinmo|FBsf0000213324);(TF_binding_site|mE1_TFBS_inv|FBsf0000237534)
leucylalanine	40010	X_20507466_SNP	Intergenic	Intergenic	Intergenic		A	G	G	0.1515	5	28	-1.922	4.60477e-09	-
leucylalanine	40010	2L_3236134_SNP	Intergenic	Intergenic	Intergenic		A	G	G	0.1	4	36	-2.053	1.11157e-08	-
leucylalanine	40010	2R_3688011_SNP	FBgn0002891	mus205	SYNONYMOUS_CODING	0	A	C	C	0.1	4	36	-2.053	1.11157e-08	(TF_binding_site|mE1_TFBS_cad|FBsf0000246015);(TF_binding_site|mE1_TFBS_chinmo|FBsf0000210810)
leucylalanine	40010	2R_3688011_SNP	FBgn0033224	Nop17l	DOWNSTREAM	279	A	C	C	0.1	4	36	-2.053	1.11157e-08	(TF_binding_site|mE1_TFBS_cad|FBsf0000246015);(TF_binding_site|mE1_TFBS_chinmo|FBsf0000210810)
leucylalanine	40010	2L_7851808_SNP	FBgn0031955	CG14535	INTRON	0	C	T	T	0.1579	6	32	-1.705	3.01968e-08	-
leucylglutamine*	48189	2L_10557400_SNP	FBgn0051721	Trim9	INTRON	0	A	G	A	0.125	5	35	-2.951	2.5519e-11	(TF_binding_site|mE1_TFBS_inv|FBsf0000234840)
leucylglutamine*	48189	X_9669682_SNP	Intergenic	Intergenic	Intergenic		T	C	C	0.1316	5	33	-2.889	2.5137e-10	-
leucylglutamine*	48189	2R_14149713_SNP	Intergenic	Intergenic	Intergenic		G	T	T	0.1538	6	33	-2.612	1.16061e-09	-
leucylglutamine*	48189	2R_19426870_SNP	FBgn0050181	ppk3	INTRON	0	T	G	G	0.1026	4	35	-3.077	2.42449e-09	(TF_binding_site|BDTNP1_TFBS_da|FBsf0000325250);(TF_binding_site|mE1_TFBS_cad|FBsf0000247349);(TF_binding_site|mE1_TFBS_chinmo|FBsf0000211907);(TF_binding_site|mE1_TFBS_HSA|FBsf0000359815)
leucylglutamine*	48189	2R_19426870_SNP	FBgn0000241	bw	UPSTREAM	848	T	G	G	0.1026	4	35	-3.077	2.42449e-09	(TF_binding_site|BDTNP1_TFBS_da|FBsf0000325250);(TF_binding_site|mE1_TFBS_cad|FBsf0000247349);(TF_binding_site|mE1_TFBS_chinmo|FBsf0000211907);(TF_binding_site|mE1_TFBS_HSA|FBsf0000359815)
leucylglutamine*	48189	2R_19428955_SNP	FBgn0041233	Gr59e	INTRON	0	G	A	A	0.1	4	36	-3.065	2.8342e-09	(TF_binding_site|mE1_TFBS_cad|FBsf0000247349)
leucylglutamine*	48189	2R_19428955_SNP	FBgn0050181	ppk3	UPSTREAM	659	G	A	A	0.1	4	36	-3.065	2.8342e-09	(TF_binding_site|mE1_TFBS_cad|FBsf0000247349)
leucylglutamine*	48189	2R_19428958_SNP	FBgn0041233	Gr59e	INTRON	0	G	A	A	0.1	4	36	-3.065	2.8342e-09	(TF_binding_site|mE1_TFBS_cad|FBsf0000247349)
leucylglutamine*	48189	2R_19428958_SNP	FBgn0050181	ppk3	UPSTREAM	662	G	A	A	0.1	4	36	-3.065	2.8342e-09	(TF_binding_site|mE1_TFBS_cad|FBsf0000247349)
leucylglutamine*	48189	X_11526539_SNP	FBgn0004370	Ptp10D	INTRON	0	G	A	A	0.1	4	36	-3.051	3.5364e-09	-
leucylglutamine*	48189	X_11526583_SNP	FBgn0004370	Ptp10D	INTRON	0	A	G	G	0.1026	4	35	-3.051	3.83883e-09	-
leucylglutamine*	48189	X_16638853_SNP	FBgn0027528	CG9634	INTRON	0	A	G	G	0.1026	4	35	-3.037	5.07526e-09	(TF_binding_site|BDTNP1_TFBS_dl|FBsf0000319641);(TF_binding_site|mE1_TFBS_HSA|FBsf0000348661);(TF_binding_site|mE1_TFBS_sens|FBsf0000221306)
leucylglutamine*	48189	X_16638853_SNP	FBgn0052574	Twdlalpha	DOWNSTREAM	455	A	G	G	0.1026	4	35	-3.037	5.07526e-09	(TF_binding_site|BDTNP1_TFBS_dl|FBsf0000319641);(TF_binding_site|mE1_TFBS_HSA|FBsf0000348661);(TF_binding_site|mE1_TFBS_sens|FBsf0000221306)
leucylglutamine*	48189	2R_13721697_DEL	FBgn0259211	grh	INTRON	0	T	TTCACTTGGCT	TTCACTTGGCT	0.1515	5	28	-2.775	6.59506e-09	-
leucylglutamine*	48189	3R_21011621_SNP	FBgn0039286	dan	INTRON	0	C	A	A	0.125	4	28	-3.061	6.86411e-09	(TF_binding_site|BDTNP1_TFBS_dl|FBsf0000314014);(TF_binding_site|BDTNP1_TFBS_Med|FBsf0000286537)
leucylglutamine*	48189	3R_21011621_SNP	FBgn0083946	lobo	INTRON	0	C	A	A	0.125	4	28	-3.061	6.86411e-09	(TF_binding_site|BDTNP1_TFBS_dl|FBsf0000314014);(TF_binding_site|BDTNP1_TFBS_Med|FBsf0000286537)
leucylglutamine*	48189	3R_21011622_SNP	FBgn0083946	lobo	INTRON	0	A	T	T	0.125	4	28	-3.061	6.86411e-09	(TF_binding_site|BDTNP1_TFBS_dl|FBsf0000314014);(TF_binding_site|BDTNP1_TFBS_Med|FBsf0000286537)
leucylglutamine*	48189	3R_21011622_SNP	FBgn0039286	dan	INTRON	0	A	T	T	0.125	4	28	-3.061	6.86411e-09	(TF_binding_site|BDTNP1_TFBS_dl|FBsf0000314014);(TF_binding_site|BDTNP1_TFBS_Med|FBsf0000286537)
leucylglutamine*	48189	X_14089201_SNP	FBgn0004649	yl	NON_SYNONYMOUS_CODING	0	C	G	G	0.225	9	31	-2.157	7.19977e-09	(TF_binding_site|mE1_TFBS_cad|FBsf0000243390);(TF_binding_site|mE1_TFBS_chinmo|FBsf0000208890);(TF_binding_site|mE1_TFBS_sens|FBsf0000220876)
leucylglutamine*	48189	3L_24022801_SNP	FBgn0058045	CG40045	INTRON	0	C	T	T	0.1081	4	33	-2.959	2.56751e-08	-
leucylglutamine*	48189	3L_23289120_SNP	Intergenic	Intergenic	Intergenic		A	C	C	0.1026	4	35	-2.945	2.73018e-08	-
leucylglutamine*	48189	3L_23390194_SNP	Intergenic	Intergenic	Intergenic		G	A	A	0.1026	4	35	-2.945	2.73018e-08	(transposable_element|FlyBase|FBti0062664)
leucylglutamine*	48189	3L_23500652_SNP	Intergenic	Intergenic	Intergenic		G	A	A	0.1026	4	35	-2.945	2.73018e-08	(transposable_element|FlyBase|FBti0059867);(transposable_element|FlyBase|FBti0062666)
leucylglutamine*	48189	3L_23647954_SNP	FBgn0250816	AGO3	INTRON	0	T	C	C	0.1026	4	35	-2.945	2.73018e-08	(transposable_element|FlyBase|FBti0062671)
leucylglutamine*	48189	3L_23732960_SNP	FBgn0040056	CG17698	INTRON	0	T	A	A	0.1026	4	35	-2.945	2.73018e-08	-
leucylglutamine*	48189	3L_23689652_INS	Intergenic	Intergenic	Intergenic		TTA	T	T	0.1081	4	33	-2.953	2.89486e-08	(transposable_element|FlyBase|FBti0062674)
leucylglycine	40045	2L_8037695_SNP	FBgn0031976	CG7367	INTRON	0	A	G	G	0.1026	4	35	-1.791	2.44743e-08	(TF_binding_site|mE1_TFBS_HSA|FBsf0000346610);(TF_binding_site|mE1_TFBS_sens|FBsf0000216712)
leucylglycine	40045	2L_8037695_SNP	FBgn0044323	Cka	NON_SYNONYMOUS_CODING	0	A	G	G	0.1026	4	35	-1.791	2.44743e-08	(TF_binding_site|mE1_TFBS_HSA|FBsf0000346610);(TF_binding_site|mE1_TFBS_sens|FBsf0000216712)
maltotetraose	15910	3L_15963448_SNP	FBgn0000212	brm	NON_SYNONYMOUS_CODING	0	T	C	C	0.1282	5	34	-0.9558	1.26219e-09	-
maltotetraose	15910	3L_15963448_SNP	FBgn0036549	CG10516	DOWNSTREAM	446	T	C	C	0.1282	5	34	-0.9558	1.26219e-09	-
maltotetraose	15910	3L_15963449_SNP	FBgn0000212	brm	NON_SYNONYMOUS_CODING	0	T	C	C	0.1282	5	34	-0.9558	1.26219e-09	-
maltotetraose	15910	3L_15963449_SNP	FBgn0036549	CG10516	DOWNSTREAM	447	T	C	C	0.1282	5	34	-0.9558	1.26219e-09	-
maltotetraose	15910	3L_15964372_SNP	FBgn0000212	brm	INTRON	0	G	A	A	0.1282	5	34	-0.9558	1.26219e-09	(TF_binding_site|mE1_TFBS_HSA|FBsf0000365700);(TF_binding_site|mE1_TFBS_inv|FBsf0000236070);(TF_binding_site|mE1_TFBS_sens|FBsf0000224691)
maltotetraose	15910	3L_15966880_SNP	FBgn0000212	brm	SYNONYMOUS_CODING	0	A	G	G	0.1282	5	34	-0.9558	1.26219e-09	(TF_binding_site|mE1_TFBS_HSA|FBsf0000365703);(TF_binding_site|mE1_TFBS_inv|FBsf0000236071)
maltotetraose	15910	3R_18536035_SNP	FBgn0039010	CG4907	SYNONYMOUS_CODING	0	C	A	C	0.2	8	32	-0.7816	1.92152e-09	(TF_binding_site|BDTNP1_TFBS_twi|FBsf0000265802);(TF_binding_site|mE1_TFBS_HSA|FBsf0000374223);(TF_binding_site|mE1_TFBS_sens|FBsf0000233020)
maltotetraose	15910	3R_18536035_SNP	FBgn0051151	wge	DOWNSTREAM	570	C	A	C	0.2	8	32	-0.7816	1.92152e-09	(TF_binding_site|BDTNP1_TFBS_twi|FBsf0000265802);(TF_binding_site|mE1_TFBS_HSA|FBsf0000374223);(TF_binding_site|mE1_TFBS_sens|FBsf0000233020)
maltotetraose	15910	2L_7999397_SNP	FBgn0031971	Sirup	SYNONYMOUS_CODING	0	C	T	T	0.125	5	35	-0.9254	9.21245e-09	(TF_binding_site|BDTNP1_TFBS_dl|FBsf0000297395);(TF_binding_site|BDTNP1_TFBS_Med|FBsf0000277942);(TF_binding_site|BDTNP1_TFBS_twi|FBsf0000201185);(TF_binding_site|mE1_TFBS_cad|FBsf0000241659)
maltotetraose	15910	2L_7999397_SNP	FBgn0031972	Wwox	DOWNSTREAM	273	C	T	T	0.125	5	35	-0.9254	9.21245e-09	(TF_binding_site|BDTNP1_TFBS_dl|FBsf0000297395);(TF_binding_site|BDTNP1_TFBS_Med|FBsf0000277942);(TF_binding_site|BDTNP1_TFBS_twi|FBsf0000201185);(TF_binding_site|mE1_TFBS_cad|FBsf0000241659)
maltotetraose	15910	3L_15968341_SNP	FBgn0000212	brm	INTRON	0	T	G	G	0.1053	4	34	-1.01	1.27599e-08	(TF_binding_site|mE1_TFBS_HSA|FBsf0000365704)
maltotetraose	15910	3L_15968341_SNP	FBgn0036550	CG17026	UPSTREAM	127	T	G	G	0.1053	4	34	-1.01	1.27599e-08	(TF_binding_site|mE1_TFBS_HSA|FBsf0000365704)
maltotetraose	15910	3L_15745457_SNP	Intergenic	Intergenic	Intergenic		A	G	G	0.1	4	36	-1.004	2.19667e-08	-
maltotetraose	15910	2R_12225745_SNP	FBgn0010611	Hmgs	INTRON	0	T	C	C	0.1	4	36	-0.9977	2.47191e-08	(TF_binding_site|mE1_TFBS_Trl|FBsf0000338738)
maltotetraose	15910	2R_12226069_SNP	FBgn0010611	Hmgs	INTRON	0	T	A	A	0.1	4	36	-0.9977	2.47191e-08	(TF_binding_site|mE1_TFBS_HSA|FBsf0000357415);(TF_binding_site|mE1_TFBS_Trl|FBsf0000338738)
maltotetraose	15910	2R_12226089_SNP	FBgn0010611	Hmgs	INTRON	0	G	C	C	0.1	4	36	-0.9977	2.47191e-08	(TF_binding_site|mE1_TFBS_HSA|FBsf0000357415);(TF_binding_site|mE1_TFBS_Trl|FBsf0000338738)
maltotetraose	15910	2R_12226120_SNP	FBgn0010611	Hmgs	INTRON	0	T	C	C	0.1	4	36	-0.9977	2.47191e-08	(TF_binding_site|mE1_TFBS_HSA|FBsf0000357415);(TF_binding_site|mE1_TFBS_Trl|FBsf0000338738)
maltotetraose	15910	2R_12226135_SNP	FBgn0010611	Hmgs	INTRON	0	T	A	A	0.1	4	36	-0.9977	2.47191e-08	(TF_binding_site|mE1_TFBS_HSA|FBsf0000357415);(TF_binding_site|mE1_TFBS_Trl|FBsf0000338738)
maltotetraose	15910	2R_12226178_SNP	FBgn0010611	Hmgs	INTRON	0	C	T	T	0.1	4	36	-0.9977	2.47191e-08	(TF_binding_site|mE1_TFBS_HSA|FBsf0000357415);(TF_binding_site|mE1_TFBS_Trl|FBsf0000338738)
maltotetraose	15910	2R_12227182_SNP	FBgn0010611	Hmgs	SYNONYMOUS_CODING	0	T	C	C	0.1	4	36	-0.9977	2.47191e-08	(TF_binding_site|mE1_TFBS_chinmo|FBsf0000211434);(TF_binding_site|mE1_TFBS_HSA|FBsf0000357416)
maltotetraose	15910	2R_12228121_SNP	FBgn0010611	Hmgs	SYNONYMOUS_CODING	0	A	G	G	0.1	4	36	-0.9977	2.47191e-08	(TF_binding_site|mE1_TFBS_chinmo|FBsf0000211434)
maltotetraose	15910	2R_12228121_SNP	FBgn0034117	CG7997	DOWNSTREAM	635	A	G	G	0.1	4	36	-0.9977	2.47191e-08	(TF_binding_site|mE1_TFBS_chinmo|FBsf0000211434)
maltotetraose	15910	3L_12557055_SNP	FBgn0036302	sowah	INTRON	0	G	A	A	0.1143	4	31	-1.002	2.8927e-08	-
maltotriose	44688	2R_20405178_MNP	FBgn0259186	Ir60c	UPSTREAM	169	TTCAA	AGAGT	AGAGT	0.15	6	34	-0.7721	4.15478e-09	(TF_binding_site|mE1_TFBS_cad|FBsf0000247462);(TF_binding_site|mE1_TFBS_chinmo|FBsf0000212075);(TF_binding_site|mE1_TFBS_HSA|FBsf0000360223)
maltotriose	44688	2R_20405178_MNP	FBgn0259185	Ir60b	DOWNSTREAM	197	TTCAA	AGAGT	AGAGT	0.15	6	34	-0.7721	4.15478e-09	(TF_binding_site|mE1_TFBS_cad|FBsf0000247462);(TF_binding_site|mE1_TFBS_chinmo|FBsf0000212075);(TF_binding_site|mE1_TFBS_HSA|FBsf0000360223)
maltotriose	44688	2R_20405190_SNP	FBgn0259186	Ir60c	UPSTREAM	157	A	T	T	0.15	6	34	-0.7721	4.15478e-09	(TF_binding_site|mE1_TFBS_cad|FBsf0000247462);(TF_binding_site|mE1_TFBS_chinmo|FBsf0000212075);(TF_binding_site|mE1_TFBS_HSA|FBsf0000360223)
maltotriose	44688	2R_20405190_SNP	FBgn0259185	Ir60b	DOWNSTREAM	209	A	T	T	0.15	6	34	-0.7721	4.15478e-09	(TF_binding_site|mE1_TFBS_cad|FBsf0000247462);(TF_binding_site|mE1_TFBS_chinmo|FBsf0000212075);(TF_binding_site|mE1_TFBS_HSA|FBsf0000360223)
maltotriose	44688	2R_20405191_SNP	FBgn0259186	Ir60c	UPSTREAM	156	A	G	G	0.15	6	34	-0.7721	4.15478e-09	(TF_binding_site|mE1_TFBS_cad|FBsf0000247462);(TF_binding_site|mE1_TFBS_chinmo|FBsf0000212075);(TF_binding_site|mE1_TFBS_HSA|FBsf0000360223)
maltotriose	44688	2R_20405191_SNP	FBgn0259185	Ir60b	DOWNSTREAM	210	A	G	G	0.15	6	34	-0.7721	4.15478e-09	(TF_binding_site|mE1_TFBS_cad|FBsf0000247462);(TF_binding_site|mE1_TFBS_chinmo|FBsf0000212075);(TF_binding_site|mE1_TFBS_HSA|FBsf0000360223)
maltotriose	44688	2R_20405193_SNP	FBgn0259186	Ir60c	UPSTREAM	154	G	A	A	0.15	6	34	-0.7721	4.15478e-09	(TF_binding_site|mE1_TFBS_cad|FBsf0000247462);(TF_binding_site|mE1_TFBS_chinmo|FBsf0000212075);(TF_binding_site|mE1_TFBS_HSA|FBsf0000360223)
maltotriose	44688	2R_20405193_SNP	FBgn0259185	Ir60b	DOWNSTREAM	212	G	A	A	0.15	6	34	-0.7721	4.15478e-09	(TF_binding_site|mE1_TFBS_cad|FBsf0000247462);(TF_binding_site|mE1_TFBS_chinmo|FBsf0000212075);(TF_binding_site|mE1_TFBS_HSA|FBsf0000360223)
maltotriose	44688	2R_20405194_INS	FBgn0259186	Ir60c	UPSTREAM	152	TCCACC	T	T	0.15	6	34	-0.7721	4.15478e-09	(TF_binding_site|mE1_TFBS_cad|FBsf0000247462);(TF_binding_site|mE1_TFBS_chinmo|FBsf0000212075);(TF_binding_site|mE1_TFBS_HSA|FBsf0000360223)
maltotriose	44688	2R_20405194_INS	FBgn0259185	Ir60b	DOWNSTREAM	214	TCCACC	T	T	0.15	6	34	-0.7721	4.15478e-09	(TF_binding_site|mE1_TFBS_cad|FBsf0000247462);(TF_binding_site|mE1_TFBS_chinmo|FBsf0000212075);(TF_binding_site|mE1_TFBS_HSA|FBsf0000360223)
maltotriose	44688	2R_20405198_SNP	FBgn0259186	Ir60c	UPSTREAM	149	A	C	C	0.15	6	34	-0.7721	4.15478e-09	(TF_binding_site|mE1_TFBS_cad|FBsf0000247462);(TF_binding_site|mE1_TFBS_chinmo|FBsf0000212075);(TF_binding_site|mE1_TFBS_HSA|FBsf0000360223)
maltotriose	44688	2R_20405198_SNP	FBgn0259185	Ir60b	DOWNSTREAM	217	A	C	C	0.15	6	34	-0.7721	4.15478e-09	(TF_binding_site|mE1_TFBS_cad|FBsf0000247462);(TF_binding_site|mE1_TFBS_chinmo|FBsf0000212075);(TF_binding_site|mE1_TFBS_HSA|FBsf0000360223)
maltotriose	44688	2R_20405203_SNP	FBgn0259186	Ir60c	UPSTREAM	144	A	C	C	0.15	6	34	-0.7721	4.15478e-09	(TF_binding_site|mE1_TFBS_cad|FBsf0000247462);(TF_binding_site|mE1_TFBS_chinmo|FBsf0000212075);(TF_binding_site|mE1_TFBS_HSA|FBsf0000360223)
maltotriose	44688	2R_20405203_SNP	FBgn0259185	Ir60b	DOWNSTREAM	222	A	C	C	0.15	6	34	-0.7721	4.15478e-09	(TF_binding_site|mE1_TFBS_cad|FBsf0000247462);(TF_binding_site|mE1_TFBS_chinmo|FBsf0000212075);(TF_binding_site|mE1_TFBS_HSA|FBsf0000360223)
maltotriose	44688	2R_20405209_INS	FBgn0259186	Ir60c	UPSTREAM	138	AACTCAAA	G	G	0.15	6	34	-0.7721	4.15478e-09	(TF_binding_site|mE1_TFBS_cad|FBsf0000247462);(TF_binding_site|mE1_TFBS_chinmo|FBsf0000212075)
maltotriose	44688	2R_20405209_INS	FBgn0259185	Ir60b	DOWNSTREAM	228	AACTCAAA	G	G	0.15	6	34	-0.7721	4.15478e-09	(TF_binding_site|mE1_TFBS_cad|FBsf0000247462);(TF_binding_site|mE1_TFBS_chinmo|FBsf0000212075)
maltotriose	44688	2R_20405213_SNP	FBgn0259186	Ir60c	UPSTREAM	134	T	A	A	0.15	6	34	-0.7721	4.15478e-09	(TF_binding_site|mE1_TFBS_cad|FBsf0000247462);(TF_binding_site|mE1_TFBS_chinmo|FBsf0000212075)
maltotriose	44688	2R_20405213_SNP	FBgn0259185	Ir60b	DOWNSTREAM	232	T	A	A	0.15	6	34	-0.7721	4.15478e-09	(TF_binding_site|mE1_TFBS_cad|FBsf0000247462);(TF_binding_site|mE1_TFBS_chinmo|FBsf0000212075)
maltotriose	44688	2R_20405216_SNP	FBgn0259186	Ir60c	UPSTREAM	131	A	C	C	0.15	6	34	-0.7721	4.15478e-09	(TF_binding_site|mE1_TFBS_cad|FBsf0000247462);(TF_binding_site|mE1_TFBS_chinmo|FBsf0000212075)
maltotriose	44688	2R_20405216_SNP	FBgn0259185	Ir60b	DOWNSTREAM	235	A	C	C	0.15	6	34	-0.7721	4.15478e-09	(TF_binding_site|mE1_TFBS_cad|FBsf0000247462);(TF_binding_site|mE1_TFBS_chinmo|FBsf0000212075)
maltotriose	44688	2R_20405201_SNP	FBgn0259186	Ir60c	UPSTREAM	146	A	C	C	0.1538	6	33	-0.7679	6.47262e-09	(TF_binding_site|mE1_TFBS_cad|FBsf0000247462);(TF_binding_site|mE1_TFBS_chinmo|FBsf0000212075);(TF_binding_site|mE1_TFBS_HSA|FBsf0000360223)
maltotriose	44688	2R_20405201_SNP	FBgn0259185	Ir60b	DOWNSTREAM	220	A	C	C	0.1538	6	33	-0.7679	6.47262e-09	(TF_binding_site|mE1_TFBS_cad|FBsf0000247462);(TF_binding_site|mE1_TFBS_chinmo|FBsf0000212075);(TF_binding_site|mE1_TFBS_HSA|FBsf0000360223)
maltotriose	44688	3L_950764_SNP	FBgn0264574	Glut1	INTRON	0	A	G	G	0.1111	4	32	-0.9161	7.55554e-09	-
maltotriose	44688	2R_20405214_SNP	FBgn0259186	Ir60c	UPSTREAM	133	C	G	G	0.1316	5	33	-0.822	1.17326e-08	(TF_binding_site|mE1_TFBS_cad|FBsf0000247462);(TF_binding_site|mE1_TFBS_chinmo|FBsf0000212075)
maltotriose	44688	2R_20405214_SNP	FBgn0259185	Ir60b	DOWNSTREAM	233	C	G	G	0.1316	5	33	-0.822	1.17326e-08	(TF_binding_site|mE1_TFBS_cad|FBsf0000247462);(TF_binding_site|mE1_TFBS_chinmo|FBsf0000212075)
maltotriose	44688	2R_20405197_SNP	FBgn0259186	Ir60c	UPSTREAM	150	A	G	G	0.1282	5	34	-0.8149	1.59659e-08	(TF_binding_site|mE1_TFBS_cad|FBsf0000247462);(TF_binding_site|mE1_TFBS_chinmo|FBsf0000212075);(TF_binding_site|mE1_TFBS_HSA|FBsf0000360223)
maltotriose	44688	2R_20405197_SNP	FBgn0259185	Ir60b	DOWNSTREAM	216	A	G	G	0.1282	5	34	-0.8149	1.59659e-08	(TF_binding_site|mE1_TFBS_cad|FBsf0000247462);(TF_binding_site|mE1_TFBS_chinmo|FBsf0000212075);(TF_binding_site|mE1_TFBS_HSA|FBsf0000360223)
maltotriose	44688	2L_14900804_SNP	Intergenic	Intergenic	Intergenic		C	T	T	0.1579	6	32	-0.7547	1.8624e-08	-
maltotriose	44688	2L_14839600_SNP	FBgn0264349	CR43805	DOWNSTREAM	834	T	C	T	0.1	4	36	-0.8903	2.31641e-08	-
mevalonate	39583	2L_2542037_SNP	Intergenic	Intergenic	Intergenic		T	A	A	0.125	5	35	-0.08728	3.30645e-09	-
mevalonate	39583	X_485239_SNP	FBgn0025633	CG13366	INTRON	0	A	G	G	0.1053	4	34	-0.09464	5.33354e-09	(silencer|mE1_HDAC_PRE|FBsf0000343230);(TF_binding_site|BDTNP1_TFBS_da|FBsf0000331185);(TF_binding_site|BDTNP1_TFBS_dl|FBsf0000315528);(TF_binding_site|BDTNP1_TFBS_Med|FBsf0000287310);(TF_binding_site|BDTNP1_TFBS_prd|FBsf0000275844);(TF_binding_site|BDTNP1_TFBS_sna|FBsf0000269747);(TF_binding_site|BDTNP1_TFBS_twi|FBsf0000204682);(TF_binding_site|mE1_TFBS_HSA|FBsf0000377788);(TF_binding_site|mE1_T…
mevalonate	39583	X_485239_SNP	FBgn0261930	vnd	INTRON	0	A	G	G	0.1053	4	34	-0.09464	5.33354e-09	(silencer|mE1_HDAC_PRE|FBsf0000343230);(TF_binding_site|BDTNP1_TFBS_da|FBsf0000331185);(TF_binding_site|BDTNP1_TFBS_dl|FBsf0000315528);(TF_binding_site|BDTNP1_TFBS_Med|FBsf0000287310);(TF_binding_site|BDTNP1_TFBS_prd|FBsf0000275844);(TF_binding_site|BDTNP1_TFBS_sna|FBsf0000269747);(TF_binding_site|BDTNP1_TFBS_twi|FBsf0000204682);(TF_binding_site|mE1_TFBS_HSA|FBsf0000377788);(TF_binding_site|mE1_T…
mevalonate	39583	X_404507_SNP	FBgn0260400	elav	UTR_3_PRIME	0	G	A	A	0.1026	4	35	-0.09406	6.57124e-09	-
mevalonate	39583	X_404507_SNP	FBgn0023535	arg	INTRON	0	G	A	A	0.1026	4	35	-0.09406	6.57124e-09	-
mevalonate	39583	2R_2355577_SNP	Intergenic	Intergenic	Intergenic		C	G	G	0.1026	4	35	-0.0991	7.18156e-09	(transposable_element|FlyBase|FBti0019969);(transposable_element|FlyBase|FBti0060325)
mevalonate	39583	2L_2545732_DEL	Intergenic	Intergenic	Intergenic		T	CC	CC	0.1282	5	34	-0.08569	8.30754e-09	-
mevalonate	39583	2L_3265808_SNP	FBgn0267270	CR45706	UPSTREAM	94	T	A	A	0.1	4	36	-0.09862	8.64144e-09	-
mevalonate	39583	X_21285425_SNP	Intergenic	Intergenic	Intergenic		A	G	G	0.1	4	36	-0.09862	8.64144e-09	-
mevalonate	39583	2R_18573113_INS	FBgn0020257	ppa	UTR_3_PRIME	0	CC	C	C	0.1429	5	30	-0.08572	1.33736e-08	(TF_binding_site|BDTNP1_TFBS_da|FBsf0000325173);(TF_binding_site|BDTNP1_TFBS_dl|FBsf0000303960);(TF_binding_site|BDTNP1_TFBS_Med|FBsf0000281293);(TF_binding_site|mE1_TFBS_cad|FBsf0000247291);(TF_binding_site|mE1_TFBS_HSA|FBsf0000359511);(TF_binding_site|mE1_TFBS_kn|FBsf0000336415);(TF_binding_site|mE1_TFBS_Trl|FBsf0000339123)
mevalonate	39583	2R_1955841_SNP	FBgn0033058	CCHa2-R	DOWNSTREAM	11	G	T	T	0.1026	4	35	-0.09774	1.51188e-08	-
mevalonate	39583	2R_1955841_SNP	FBgn0264980	CR44131	UPSTREAM	459	G	T	T	0.1026	4	35	-0.09774	1.51188e-08	-
myristoylcarnitine	33952	3L_7068067_SNP	FBgn0054030	CG34030	NON_SYNONYMOUS_CODING	0	T	G	G	0.125	5	35	-2.225	2.5159e-08	-
myristoylcarnitine	33952	3L_7068067_SNP	FBgn0035733	CG8641	INTRON	0	T	G	G	0.125	5	35	-2.225	2.5159e-08	-
myristoylcarnitine	33952	2L_211264_SNP	FBgn0266557	kis	UTR_3_PRIME	0	C	T	T	0.1026	4	35	-2.478	2.54528e-08	-
myristoylcarnitine	33952	2L_211264_SNP	FBgn0031233	Tbc1d15-17	DOWNSTREAM	539	C	T	T	0.1026	4	35	-2.478	2.54528e-08	-
myristoylcarnitine	33952	2L_16717556_SNP	FBgn0086907	Cyt-c-d	INTRON	0	T	A	A	0.1429	5	30	-2.236	2.98703e-08	-
N-acetylalanine	1585	X_4164466_SNP	FBgn0029702	CG15572	NON_SYNONYMOUS_CODING	0	C	A	A	0.1316	5	33	-0.491	5.67534e-09	(TF_binding_site|mE1_TFBS_chinmo|FBsf0000208289)
N-acetylasparagine	33942	2R_4041236_SNP	FBgn0263593	Lpin	INTRON	0	A	G	G	0.1	4	36	-0.8027	3.15304e-09	-
N-acetylasparagine	33942	2R_4041236_SNP	FBgn0010504	kermit	INTRON	0	A	G	G	0.1	4	36	-0.8027	3.15304e-09	-
N-acetylasparagine	33942	3L_6688331_SNP	FBgn0035710	SP1173	INTRON	0	A	G	G	0.1282	5	34	-0.7051	2.03177e-08	-
N-acetylaspartate (NAA)	22185	2R_16829843_SNP	Intergenic	Intergenic	Intergenic		C	A	A	0.1111	4	32	-4.12	1.10651e-09	-
N-acetylaspartate (NAA)	22185	3R_27099964_DEL	Intergenic	Intergenic	Intergenic		A	AT	AT	0.1026	4	35	-4.058	2.11876e-09	(TF_binding_site|BDTNP1_TFBS_da|FBsf0000330978);(TF_binding_site|BDTNP1_TFBS_twi|FBsf0000266535);(TF_binding_site|mE1_TFBS_HSA|FBsf0000376966)
N-acetylaspartate (NAA)	22185	3L_5770290_SNP	FBgn0052418	vito	INTRON	0	A	G	G	0.1026	4	35	-3.989	5.85815e-09	(TF_binding_site|BDTNP1_TFBS_twi|FBsf0000203015);(TF_binding_site|mE1_TFBS_HSA|FBsf0000362452)
N-acetylaspartate (NAA)	22185	3L_5770290_SNP	FBgn0040298	Myt1	DOWNSTREAM	286	A	G	G	0.1026	4	35	-3.989	5.85815e-09	(TF_binding_site|BDTNP1_TFBS_twi|FBsf0000203015);(TF_binding_site|mE1_TFBS_HSA|FBsf0000362452)
N-acetylaspartate (NAA)	22185	3L_5770290_SNP	FBgn0260936	scny	DOWNSTREAM	919	A	G	G	0.1026	4	35	-3.989	5.85815e-09	(TF_binding_site|BDTNP1_TFBS_twi|FBsf0000203015);(TF_binding_site|mE1_TFBS_HSA|FBsf0000362452)
N-acetylaspartate (NAA)	22185	2L_10136533_SNP	FBgn0265002	CG44153	INTRON	0	A	G	G	0.1111	4	32	-4.007	5.9745e-09	(TF_binding_site|mE1_TFBS_cad|FBsf0000241796)
N-acetylaspartate (NAA)	22185	2L_10136516_SNP	FBgn0265002	CG44153	INTRON	0	G	A	A	0.1081	4	33	-3.999	6.07286e-09	-
N-acetylaspartate (NAA)	22185	2L_10136531_SNP	FBgn0265002	CG44153	INTRON	0	T	A	A	0.1081	4	33	-3.999	6.07286e-09	-
N-acetylaspartate (NAA)	22185	3L_11315313_SNP	FBgn0036154	CG6168	UPSTREAM	494	G	T	G	0.1026	4	35	-3.96	8.77921e-09	-
N-acetylaspartate (NAA)	22185	2L_11120121_SNP	FBgn0027582	CG6230	SYNONYMOUS_CODING	0	G	C	C	0.1	4	36	-3.945	9.95909e-09	(TF_binding_site|BDTNP1_TFBS_dl|FBsf0000298061);(TF_binding_site|BDTNP1_TFBS_Med|FBsf0000278305);(TF_binding_site|BDTNP1_TFBS_twi|FBsf0000201464);(TF_binding_site|mE1_TFBS_cad|FBsf0000241879);(TF_binding_site|mE1_TFBS_HSA|FBsf0000347608);(TF_binding_site|mE1_TFBS_sens|FBsf0000217250)
N-acetylaspartate (NAA)	22185	2L_11120121_SNP	FBgn0032345	CG14921	DOWNSTREAM	521	G	C	C	0.1	4	36	-3.945	9.95909e-09	(TF_binding_site|BDTNP1_TFBS_dl|FBsf0000298061);(TF_binding_site|BDTNP1_TFBS_Med|FBsf0000278305);(TF_binding_site|BDTNP1_TFBS_twi|FBsf0000201464);(TF_binding_site|mE1_TFBS_cad|FBsf0000241879);(TF_binding_site|mE1_TFBS_HSA|FBsf0000347608);(TF_binding_site|mE1_TFBS_sens|FBsf0000217250)
N-acetylaspartate (NAA)	22185	2L_11139068_SNP	FBgn0010197	Gyc32E	SYNONYMOUS_CODING	0	C	A	A	0.1	4	36	-3.945	9.95909e-09	-
N-acetylaspartate (NAA)	22185	2L_11139068_SNP	FBgn0040211	hgo	DOWNSTREAM	503	C	A	A	0.1	4	36	-3.945	9.95909e-09	-
N-acetylaspartate (NAA)	22185	2L_11141221_SNP	FBgn0010197	Gyc32E	SYNONYMOUS_CODING	0	T	C	C	0.1	4	36	-3.945	9.95909e-09	-
N-acetylaspartate (NAA)	22185	3L_11317007_SNP	FBgn0265932	CR44721	UPSTREAM	57	G	T	T	0.1	4	36	-3.945	9.95909e-09	(TF_binding_site|BDTNP1_TFBS_dl|FBsf0000306853)
N-acetylaspartate (NAA)	22185	3L_11317007_SNP	FBgn0265933	CR44722	DOWNSTREAM	64	G	T	T	0.1	4	36	-3.945	9.95909e-09	(TF_binding_site|BDTNP1_TFBS_dl|FBsf0000306853)
N-acetylaspartate (NAA)	22185	3L_11317007_SNP	FBgn0265934	CR44723	DOWNSTREAM	419	G	T	T	0.1	4	36	-3.945	9.95909e-09	(TF_binding_site|BDTNP1_TFBS_dl|FBsf0000306853)
N-acetylaspartate (NAA)	22185	3L_11317011_DEL	FBgn0265932	CR44721	UPSTREAM	62	T	TTTT	TTTT	0.1	4	36	-3.945	9.95909e-09	(TF_binding_site|BDTNP1_TFBS_dl|FBsf0000306853)
N-acetylaspartate (NAA)	22185	3L_11317011_DEL	FBgn0265933	CR44722	DOWNSTREAM	69	T	TTTT	TTTT	0.1	4	36	-3.945	9.95909e-09	(TF_binding_site|BDTNP1_TFBS_dl|FBsf0000306853)
N-acetylaspartate (NAA)	22185	3L_11317011_DEL	FBgn0265934	CR44723	DOWNSTREAM	414	T	TTTT	TTTT	0.1	4	36	-3.945	9.95909e-09	(TF_binding_site|BDTNP1_TFBS_dl|FBsf0000306853)
N-acetylaspartate (NAA)	22185	3L_11317017_SNP	FBgn0265932	CR44721	UPSTREAM	67	C	T	T	0.1	4	36	-3.945	9.95909e-09	(TF_binding_site|BDTNP1_TFBS_dl|FBsf0000306853)
N-acetylaspartate (NAA)	22185	3L_11317017_SNP	FBgn0265933	CR44722	DOWNSTREAM	74	C	T	T	0.1	4	36	-3.945	9.95909e-09	(TF_binding_site|BDTNP1_TFBS_dl|FBsf0000306853)
N-acetylaspartate (NAA)	22185	3L_11317017_SNP	FBgn0265934	CR44723	DOWNSTREAM	409	C	T	T	0.1	4	36	-3.945	9.95909e-09	(TF_binding_site|BDTNP1_TFBS_dl|FBsf0000306853)
N-acetylaspartate (NAA)	22185	3L_11317022_SNP	FBgn0265932	CR44721	UPSTREAM	72	G	A	A	0.1	4	36	-3.945	9.95909e-09	(TF_binding_site|BDTNP1_TFBS_dl|FBsf0000306853)
N-acetylaspartate (NAA)	22185	3L_11317022_SNP	FBgn0265933	CR44722	DOWNSTREAM	79	G	A	A	0.1	4	36	-3.945	9.95909e-09	(TF_binding_site|BDTNP1_TFBS_dl|FBsf0000306853)
N-acetylaspartate (NAA)	22185	3L_11317022_SNP	FBgn0265934	CR44723	DOWNSTREAM	404	G	A	A	0.1	4	36	-3.945	9.95909e-09	(TF_binding_site|BDTNP1_TFBS_dl|FBsf0000306853)
N-acetylaspartate (NAA)	22185	3L_11667149_INS	FBgn0052085	CG32085	INTRON	0	AA	T	T	0.1026	4	35	-3.946	1.06697e-08	-
N-acetylaspartate (NAA)	22185	3L_11667166_SNP	FBgn0052085	CG32085	INTRON	0	T	C	C	0.1026	4	35	-3.946	1.06697e-08	-
N-acetylaspartate (NAA)	22185	3L_11669823_SNP	FBgn0052085	CG32085	INTRON	0	A	C	C	0.1026	4	35	-3.946	1.06697e-08	-
N-acetylaspartate (NAA)	22185	3L_11669888_SNP	FBgn0052085	CG32085	INTRON	0	T	C	C	0.1026	4	35	-3.946	1.06697e-08	-
N-acetylaspartate (NAA)	22185	3L_11670317_SNP	FBgn0052085	CG32085	INTRON	0	A	T	T	0.1026	4	35	-3.946	1.06697e-08	-
N-acetylaspartate (NAA)	22185	3L_11316319_SNP	FBgn0265932	CR44721	DOWNSTREAM	137	A	G	G	0.1026	4	35	-3.945	1.08087e-08	-
N-acetylaspartate (NAA)	22185	3L_11316319_SNP	FBgn0265933	CR44722	UPSTREAM	302	A	G	G	0.1026	4	35	-3.945	1.08087e-08	-
N-acetylaspartate (NAA)	22185	3L_11668834_DEL	FBgn0052085	CG32085	INTRON	0	A	AAAGAGATCTCAGAA	AAAGAGATCTCAGAA	0.1111	4	32	-3.936	1.57259e-08	(TF_binding_site|mE1_TFBS_cad|FBsf0000244768)
N-acetylaspartate (NAA)	22185	2L_10144438_SNP	FBgn0265002	CG44153	INTRON	0	A	C	C	0.1026	4	35	-3.914	1.64792e-08	-
N-acetylaspartate (NAA)	22185	2L_10144438_SNP	FBgn0032187	CG4839	UPSTREAM	338	A	C	C	0.1026	4	35	-3.914	1.64792e-08	-
N-acetylaspartate (NAA)	22185	2R_1607006_SNP	FBgn0000099	ap	INTRON	0	A	T	A	0.1081	4	33	-3.924	1.67741e-08	-
N-acetylaspartate (NAA)	22185	2L_10137798_SNP	FBgn0265002	CG44153	INTRON	0	A	C	C	0.1	4	36	-3.904	1.73498e-08	-
N-acetylaspartate (NAA)	22185	2L_10137806_SNP	FBgn0265002	CG44153	INTRON	0	T	G	G	0.1	4	36	-3.904	1.73498e-08	-
N-acetylaspartate (NAA)	22185	2L_10144506_SNP	FBgn0265002	CG44153	INTRON	0	A	C	C	0.1	4	36	-3.904	1.73498e-08	-
N-acetylaspartate (NAA)	22185	2L_10144506_SNP	FBgn0032187	CG4839	UPSTREAM	270	A	C	C	0.1	4	36	-3.904	1.73498e-08	-
N-acetylaspartate (NAA)	22185	X_14190581_INS	Intergenic	Intergenic	Intergenic		TCT	T	T	0.1026	4	35	-3.9	1.96527e-08	-
N-acetylaspartate (NAA)	22185	2L_14013148_SNP	FBgn0027348	bgm	INTRON	0	G	A	A	0.1	4	36	-3.892	2.02811e-08	(TF_binding_site|BDTNP1_TFBS_dl|FBsf0000298563)
N-acetylaspartate (NAA)	22185	2L_14017645_SNP	FBgn0027348	bgm	INTRON	0	A	G	G	0.1	4	36	-3.892	2.02811e-08	-
N-acetylaspartate (NAA)	22185	3L_7266156_SNP	FBgn0035756	unc-13-4A	INTRON	0	C	A	A	0.1026	4	35	-3.89	2.23671e-08	(TF_binding_site|mE1_TFBS_cad|FBsf0000244406)
N-acetylaspartate (NAA)	22185	2L_10144511_SNP	FBgn0265002	CG44153	INTRON	0	G	T	T	0.1053	4	34	-3.896	2.24455e-08	-
N-acetylaspartate (NAA)	22185	2L_10144511_SNP	FBgn0032187	CG4839	UPSTREAM	265	G	T	T	0.1053	4	34	-3.896	2.24455e-08	-
N-acetylaspartate (NAA)	22185	X_14080811_SNP	FBgn0030542	CG12481	UPSTREAM	475	A	G	G	0.1053	4	34	-3.891	2.40105e-08	(TF_binding_site|mE1_TFBS_kn|FBsf0000336821);(TF_binding_site|mE1_TFBS_zfh1|FBsf0000335205)
N-acetylaspartate (NAA)	22185	X_14080811_SNP	FBgn0052603	CG32603	DOWNSTREAM	971	A	G	G	0.1053	4	34	-3.891	2.40105e-08	(TF_binding_site|mE1_TFBS_kn|FBsf0000336821);(TF_binding_site|mE1_TFBS_zfh1|FBsf0000335205)
N-acetylaspartate (NAA)	22185	2L_10144236_SNP	FBgn0265002	CG44153	INTRON	0	G	T	T	0.1081	4	33	-3.893	2.51834e-08	-
N-acetylaspartate (NAA)	22185	2L_10144236_SNP	FBgn0032187	CG4839	UPSTREAM	540	G	T	T	0.1081	4	33	-3.893	2.51834e-08	-
N-acetylaspartate (NAA)	22185	2L_10144225_SNP	FBgn0265002	CG44153	INTRON	0	C	G	G	0.1053	4	34	-3.886	2.54022e-08	-
N-acetylaspartate (NAA)	22185	2L_10144225_SNP	FBgn0032187	CG4839	UPSTREAM	551	C	G	G	0.1053	4	34	-3.886	2.54022e-08	-
N-acetylaspartate (NAA)	22185	2L_4386058_SNP	FBgn0031598	CG3338	UTR_5_PRIME	0	G	A	A	0.1053	4	34	-3.899	2.67921e-08	(TF_binding_site|BDTNP1_TFBS_dl|FBsf0000296611);(TF_binding_site|BDTNP1_TFBS_Med|FBsf0000277528);(TF_binding_site|BDTNP1_TFBS_twi|FBsf0000200817);(TF_binding_site|mE1_TFBS_cad|FBsf0000241314)
N-acetylaspartate (NAA)	22185	2L_4386058_SNP	FBgn0261976	Psf2	DOWNSTREAM	124	G	A	A	0.1053	4	34	-3.899	2.67921e-08	(TF_binding_site|BDTNP1_TFBS_dl|FBsf0000296611);(TF_binding_site|BDTNP1_TFBS_Med|FBsf0000277528);(TF_binding_site|BDTNP1_TFBS_twi|FBsf0000200817);(TF_binding_site|mE1_TFBS_cad|FBsf0000241314)
N-acetylaspartate (NAA)	22185	3R_24692820_SNP	FBgn0264324	spg	INTRON	0	A	T	T	0.1026	4	35	-3.877	2.69734e-08	-
N-acetylaspartate (NAA)	22185	3L_11512523_SNP	FBgn0036169	Fuca	SYNONYMOUS_CODING	0	A	G	G	0.1081	4	33	-3.902	2.88537e-08	-
N-acetylaspartate (NAA)	22185	3L_11512523_SNP	FBgn0036168	CG7512	DOWNSTREAM	519	A	G	G	0.1081	4	33	-3.902	2.88537e-08	-
N-acetyl-beta-alanine	37432	2R_1161262_SNP	FBgn0033015	d4	INTRON	0	A	G	G	0.1111	4	32	-1.169	3.1573e-14	-
N-acetyl-beta-alanine	37432	3L_2220559_SNP	Intergenic	Intergenic	Intergenic		G	A	A	0.1026	4	35	-1.154	9.2945e-14	-
N-acetyl-beta-alanine	37432	2R_1154774_SNP	FBgn0033015	d4	INTRON	0	A	G	G	0.1351	5	32	-0.9923	4.7975e-11	-
N-acetyl-beta-alanine	37432	2R_1158746_SNP	FBgn0033015	d4	INTRON	0	T	C	C	0.1471	5	29	-0.9964	5.9723e-11	(transposable_element|FlyBase|FBti0018891)
N-acetyl-beta-alanine	37432	3R_7461443_SNP	FBgn0262081	Csk	SYNONYMOUS_CODING	0	T	C	C	0.15	6	34	-0.9092	6.9775e-11	(TF_binding_site|mE1_TFBS_cad|FBsf0000248142);(TF_binding_site|mE1_TFBS_HSA|FBsf0000370668);(TF_binding_site|mE1_TFBS_sens|FBsf0000231304)
N-acetyl-beta-alanine	37432	2R_17777091_SNP	FBgn0085397	Fili	INTRON	0	T	G	G	0.1	4	36	-1.08	7.7861e-11	-
N-acetyl-beta-alanine	37432	X_20183286_SNP	FBgn0031100	CG1504	INTRON	0	C	T	T	0.1	4	36	-1.08	7.7861e-11	-
N-acetyl-beta-alanine	37432	2R_13071986_SNP	FBgn0265537	CR44387	UPSTREAM	615	T	C	C	0.1538	6	33	-0.8893	5.1447e-10	-
N-acetyl-beta-alanine	37432	3R_8011771_SNP	Intergenic	Intergenic	Intergenic		T	G	G	0.1351	5	32	-0.9516	7.8531e-10	-
N-acetyl-beta-alanine	37432	3L_7963020_SNP	FBgn0010406	RNaseX25	UPSTREAM	668	A	C	C	0.1176	4	30	-1.039	1.78006e-09	(TF_binding_site|mE1_TFBS_inv|FBsf0000235850)
N-acetyl-beta-alanine	37432	2L_8233024_SNP	FBgn0032006	Pvr	INTRON	0	T	C	C	0.125	5	35	-0.9336	2.03934e-09	-
N-acetyl-beta-alanine	37432	3L_7962751_SNP	FBgn0010406	RNaseX25	UPSTREAM	937	G	C	C	0.1081	4	33	-1.026	3.15455e-09	(TF_binding_site|mE1_TFBS_HSA|FBsf0000363136);(TF_binding_site|mE1_TFBS_inv|FBsf0000235850)
N-acetyl-beta-alanine	37432	2L_11008485_SNP	FBgn0021761	Nup154	NON_SYNONYMOUS_CODING	0	T	G	T	0.1579	6	32	-0.865	3.40664e-09	-
N-acetyl-beta-alanine	37432	X_5004868_SNP	FBgn0029746	CG15465	INTRON	0	T	C	C	0.1081	4	33	-1.019	3.56139e-09	-
N-acetyl-beta-alanine	37432	X_5004868_SNP	FBgn0266098	rg	INTRON	0	T	C	C	0.1081	4	33	-1.019	3.56139e-09	-
N-acetyl-beta-alanine	37432	X_21318443_INS	FBgn0259245	CG42343	INTRON	0	TCCACTCT	T	T	0.1081	4	33	-1.025	3.63953e-09	-
N-acetyl-beta-alanine	37432	3L_7963068_SNP	FBgn0010406	RNaseX25	UPSTREAM	620	G	C	C	0.1	4	36	-1.02	3.73228e-09	(TF_binding_site|mE1_TFBS_inv|FBsf0000235850)
N-acetyl-beta-alanine	37432	3L_7963381_SNP	FBgn0010406	RNaseX25	UPSTREAM	307	A	T	T	0.1	4	36	-1.02	3.73228e-09	(TF_binding_site|mE1_TFBS_HSA|FBsf0000363137)
N-acetyl-beta-alanine	37432	3L_7963034_SNP	FBgn0010406	RNaseX25	UPSTREAM	654	A	T	T	0.1026	4	35	-1.021	3.84439e-09	(TF_binding_site|mE1_TFBS_inv|FBsf0000235850)
N-acetyl-beta-alanine	37432	X_6858361_SNP	FBgn0029922	CG14431	INTRON	0	A	G	G	0.1053	4	34	-1.017	4.07094e-09	(TF_binding_site|mE1_TFBS_chinmo|FBsf0000208482)
N-acetyl-beta-alanine	37432	X_6858361_SNP	FBgn0052732	CG32732	INTRON	0	A	G	G	0.1053	4	34	-1.017	4.07094e-09	(TF_binding_site|mE1_TFBS_chinmo|FBsf0000208482)
N-acetyl-beta-alanine	37432	3L_7962626_SNP	Intergenic	Intergenic	Intergenic		C	T	T	0.1053	4	34	-1.016	5.38764e-09	(TF_binding_site|mE1_TFBS_HSA|FBsf0000363136);(TF_binding_site|mE1_TFBS_inv|FBsf0000235850)
N-acetyl-beta-alanine	37432	X_2212649_DEL	FBgn0003079	phl	INTRON	0	G	GT	GT	0.15	6	34	-0.8458	6.99087e-09	(TF_binding_site|BDTNP1_TFBS_da|FBsf0000331412);(TF_binding_site|BDTNP1_TFBS_dl|FBsf0000316019);(TF_binding_site|BDTNP1_TFBS_Med|FBsf0000287514);(TF_binding_site|BDTNP1_TFBS_twi|FBsf0000204877);(TF_binding_site|mE1_TFBS_cad|FBsf0000242747);(TF_binding_site|mE1_TFBS_h|FBsf0000257746);(TF_binding_site|mE1_TFBS_HSA|FBsf0000378487);(TF_binding_site|mE1_TFBS_HSA|FBsf0000378488);(TF_binding_site|mE1_TF…
N-acetyl-beta-alanine	37432	2L_16309352_SNP	FBgn0011708	Syx5	DOWNSTREAM	78	G	A	A	0.1053	4	34	-1.009	8.23072e-09	-
N-acetyl-beta-alanine	37432	2L_16309352_SNP	FBgn0000339	cni	DOWNSTREAM	244	G	A	A	0.1053	4	34	-1.009	8.23072e-09	-
N-acetyl-beta-alanine	37432	3L_16064896_SNP	FBgn0005536	Mbs	INTRON	0	T	C	T	0.1053	4	34	-1.004	9.55361e-09	-
N-acetyl-beta-alanine	37432	2R_1287234_SNP	Intergenic	Intergenic	Intergenic		A	G	G	0.15	6	34	-0.8429	1.19019e-08	-
N-acetyl-beta-alanine	37432	2R_1322013_SNP	FBgn0259247	laccase2	INTRON	0	G	A	A	0.1389	5	31	-0.917	1.23308e-08	-
N-acetyl-beta-alanine	37432	3L_1163714_INS	FBgn0025525	bab2	INTRON	0	GCGAAGAAGGGG	G	G	0.1316	5	33	-0.9045	1.54801e-08	(regulatory_region|REDfly_CRMs|FBsf0000436249);(TF_binding_site|mE1_TFBS_cnc|FBsf0000206453);(TF_binding_site|mE1_TFBS_HSA|FBsf0000361002)
N-acetyl-beta-alanine	37432	2R_13071991_INS	FBgn0265537	CR44387	UPSTREAM	609	AC	A	A	0.1351	5	32	-0.9037	1.78034e-08	-
N-acetyl-beta-alanine	37432	X_17344694_SNP	FBgn0030841	CG8568	NON_SYNONYMOUS_CODING	0	T	G	G	0.1026	4	35	-0.9836	2.38925e-08	(TF_binding_site|mE1_TFBS_cad|FBsf0000243579)
N-acetylcysteine	1586	3L_6515451_DEL	FBgn0020251	sfl	INTRON	0	T	TT	TT	0.15	6	34	-0.5335	6.16038e-09	-
N-acetylcysteine	1586	3L_6981700_SNP	Intergenic	Intergenic	Intergenic		C	A	A	0.125	5	35	-0.5603	2.79326e-08	(silencer|mE1_HDAC_PRE|FBsf0000343523);(TF_binding_site|BDTNP1_TFBS_dl|FBsf0000306015);(TF_binding_site|mE1_TFBS_bab1|FBsf0000214429);(TF_binding_site|mE1_TFBS_cad|FBsf0000244390);(TF_binding_site|mE1_TFBS_HSA|FBsf0000362841);(TF_binding_site|mE1_TFBS_Trl|FBsf0000339597)
N-acetylglucosamine 6-phosphate	15107	X_2390295_SNP	FBgn0261451	trol	INTRON	0	C	T	T	0.1026	4	35	-0.5389	4.2876e-09	(TF_binding_site|BDTNP1_TFBS_dl|FBsf0000316098);(TF_binding_site|mE1_TFBS_HSA|FBsf0000378578)
N-acetylglucosamine 6-phosphate	15107	2L_13948437_SNP	FBgn0032536	Ance-3	INTRON	0	A	G	G	0.1143	4	31	-0.5382	7.15134e-09	-
N-acetylglucosamine 6-phosphate	15107	2L_13948437_SNP	FBgn0028544	CG16884	UPSTREAM	961	A	G	G	0.1143	4	31	-0.5382	7.15134e-09	-
N-acetylglucosamine 6-phosphate	15107	2L_19450468_SNP	FBgn0003732	Top2	SYNONYMOUS_CODING	0	T	C	C	0.1026	4	35	-0.5334	7.87974e-09	(TF_binding_site|mE1_TFBS_sens|FBsf0000218328)
N-acetylglucosamine 6-phosphate	15107	2R_1374129_SNP	FBgn0050440	CG30440	INTRON	0	A	G	G	0.1111	4	32	-0.5237	2.30211e-08	(transposable_element|FlyBase|FBti0019035)
N-acetylglucosamine/N-acetylgalactosamine	46539	2R_3024583_SNP	Intergenic	Intergenic	Intergenic		G	C	C	0.1053	4	34	-0.532	1.99338e-08	-
N-acetylglucosamine/N-acetylgalactosamine	46539	2R_13836587_SNP	Intergenic	Intergenic	Intergenic		A	G	G	0.1	4	36	-0.5325	2.42854e-08	-
N-acetylglutamate	15720	3L_10750707_SNP	Intergenic	Intergenic	Intergenic		G	T	T	0.1026	4	35	-0.6612	2.4498e-11	-
N-acetylglutamate	15720	X_2320523_SNP	FBgn0001150	gt	DOWNSTREAM	623	G	A	A	0.1111	4	32	-0.6628	3.012e-11	-
N-acetylglutamate	15720	X_2320523_SNP	FBgn0052797	CG32797	UPSTREAM	635	G	A	A	0.1111	4	32	-0.6628	3.012e-11	-
N-acetylglutamate	15720	3L_12538854_SNP	FBgn0036302	sowah	INTRON	0	C	T	T	0.1053	4	34	-0.6455	1.9545e-10	-
N-acetylglutamate	15720	3L_12538769_SNP	FBgn0036302	sowah	INTRON	0	T	A	A	0.1176	4	30	-0.6468	2.8129e-10	-
N-acetylglutamate	15720	3L_12538826_SNP	FBgn0036302	sowah	INTRON	0	T	G	G	0.1176	4	30	-0.6456	3.2164e-10	-
N-acetylglutamate	15720	3L_13828920_SNP	Intergenic	Intergenic	Intergenic		T	C	C	0.1111	4	32	-0.6408	4.2218e-10	-
N-acetylglutamate	15720	3L_12538757_SNP	FBgn0036302	sowah	INTRON	0	T	C	C	0.1212	4	29	-0.6437	4.6044e-10	-
N-acetylglutamate	15720	3L_13101336_INS	Intergenic	Intergenic	Intergenic		CAATA	C	C	0.1111	4	32	-0.6399	4.6446e-10	(TF_binding_site|BDTNP1_TFBS_da|FBsf0000326886);(TF_binding_site|BDTNP1_TFBS_sna|FBsf0000269366);(TF_binding_site|mE1_TFBS_HSA|FBsf0000364812);(TF_binding_site|mE1_TFBS_inv|FBsf0000235991)
N-acetylglutamate	15720	3L_13828796_SNP	Intergenic	Intergenic	Intergenic		A	G	G	0.1026	4	35	-0.6362	5.0274e-10	-
N-acetylglutamate	15720	2R_13352199_SNP	FBgn0028953	CG14478	UTR_3_PRIME	0	A	C	C	0.1026	4	35	-0.6331	6.9656e-10	-
N-acetylglutamate	15720	3L_13087615_SNP	Intergenic	Intergenic	Intergenic		A	G	G	0.1026	4	35	-0.6329	7.1496e-10	-
N-acetylglutamate	15720	3L_13101334_SNP	Intergenic	Intergenic	Intergenic		C	T	T	0.1143	4	31	-0.637	7.223e-10	(TF_binding_site|BDTNP1_TFBS_da|FBsf0000326886);(TF_binding_site|BDTNP1_TFBS_sna|FBsf0000269366);(TF_binding_site|mE1_TFBS_HSA|FBsf0000364812);(TF_binding_site|mE1_TFBS_inv|FBsf0000235991)
N-acetylglutamate	15720	2L_15521677_SNP	FBgn0264261	CR43761	UPSTREAM	325	T	A	A	0.1	4	36	-0.6309	8.0497e-10	(TF_binding_site|mE1_TFBS_inv|FBsf0000234965)
N-acetylglutamate	15720	2R_12564642_SNP	FBgn0050463	CG30463	INTRON	0	C	T	T	0.1	4	36	-0.6309	8.0497e-10	-
N-acetylglutamate	15720	3L_12302141_SNP	Intergenic	Intergenic	Intergenic		A	G	G	0.1	4	36	-0.6309	8.0497e-10	-
N-acetylglutamate	15720	3L_12302155_SNP	Intergenic	Intergenic	Intergenic		G	A	A	0.1	4	36	-0.6309	8.0497e-10	-
N-acetylglutamate	15720	3L_12302167_SNP	Intergenic	Intergenic	Intergenic		T	C	C	0.1	4	36	-0.6309	8.0497e-10	-
N-acetylglutamate	15720	3L_12538857_SNP	FBgn0036302	sowah	INTRON	0	A	T	T	0.1	4	36	-0.6309	8.0497e-10	-
N-acetylglutamate	15720	3L_13076926_SNP	Intergenic	Intergenic	Intergenic		A	T	T	0.1	4	36	-0.6309	8.0497e-10	(TF_binding_site|BDTNP1_TFBS_da|FBsf0000326875);(TF_binding_site|BDTNP1_TFBS_dl|FBsf0000307189);(TF_binding_site|BDTNP1_TFBS_hb|FBsf0000291374);(TF_binding_site|BDTNP1_TFBS_twi|FBsf0000203659);(TF_binding_site|mE1_TFBS_cad|FBsf0000244896);(TF_binding_site|mE1_TFBS_HSA|FBsf0000364802);(TF_binding_site|mE1_TFBS_Kr|FBsf0000253569);(TF_binding_site|mE1_TFBS_sens|FBsf0000224244)
N-acetylglutamate	15720	3L_13098666_SNP	Intergenic	Intergenic	Intergenic		A	C	C	0.1	4	36	-0.6309	8.0497e-10	-
N-acetylglutamate	15720	3L_13103657_SNP	Intergenic	Intergenic	Intergenic		A	T	T	0.1	4	36	-0.6309	8.0497e-10	(TF_binding_site|BDTNP1_TFBS_da|FBsf0000326887)
N-acetylglutamate	15720	3L_13108270_SNP	FBgn0010452	trn	INTRON	0	G	C	C	0.1	4	36	-0.6309	8.0497e-10	(TF_binding_site|BDTNP1_TFBS_da|FBsf0000326891);(TF_binding_site|BDTNP1_TFBS_dl|FBsf0000307199);(TF_binding_site|BDTNP1_TFBS_Med|FBsf0000282972);(TF_binding_site|BDTNP1_TFBS_twi|FBsf0000203666);(TF_binding_site|BDTNP1_TFBS_z|FBsf0000197159);(TF_binding_site|mE1_TFBS_cad|FBsf0000244899)
N-acetylglutamate	15720	3L_13116218_SNP	Intergenic	Intergenic	Intergenic		A	C	C	0.1	4	36	-0.6309	8.0497e-10	-
N-acetylglutamate	15720	3L_13828874_SNP	Intergenic	Intergenic	Intergenic		A	G	G	0.1	4	36	-0.6309	8.0497e-10	-
N-acetylglutamate	15720	3L_13857520_SNP	FBgn0036381	CG8745	INTRON	0	G	A	A	0.1	4	36	-0.6309	8.0497e-10	(TF_binding_site|BDTNP1_TFBS_da|FBsf0000326954);(TF_binding_site|BDTNP1_TFBS_twi|FBsf0000203735)
N-acetylglutamate	15720	3L_13858281_SNP	FBgn0036381	CG8745	INTRON	0	A	T	T	0.1	4	36	-0.6309	8.0497e-10	(TF_binding_site|mE1_TFBS_inv|FBsf0000236004)
N-acetylglutamate	15720	3L_13859334_SNP	FBgn0036381	CG8745	INTRON	0	C	T	T	0.1	4	36	-0.6309	8.0497e-10	(TF_binding_site|BDTNP1_TFBS_dl|FBsf0000307297)
N-acetylglutamate	15720	3L_15162569_SNP	Intergenic	Intergenic	Intergenic		G	A	A	0.1	4	36	-0.6309	8.0497e-10	-
N-acetylglutamate	15720	3L_15164068_SNP	Intergenic	Intergenic	Intergenic		A	T	T	0.1	4	36	-0.6309	8.0497e-10	-
N-acetylglutamate	15720	3R_8770196_SNP	Intergenic	Intergenic	Intergenic		G	T	T	0.1	4	36	-0.6309	8.0497e-10	-
N-acetylglutamate	15720	3R_9860249_SNP	FBgn0038195	CG3061	UTR_3_PRIME	0	T	C	C	0.1	4	36	-0.6309	8.0497e-10	-
N-acetylglutamate	15720	3R_9860249_SNP	FBgn0038196	CG9922	DOWNSTREAM	491	T	C	C	0.1	4	36	-0.6309	8.0497e-10	-
N-acetylglutamate	15720	3L_12538894_SNP	FBgn0036302	sowah	INTRON	0	T	A	A	0.1026	4	35	-0.6313	8.4716e-10	-
N-acetylglutamate	15720	3L_12705289_SNP	Intergenic	Intergenic	Intergenic		T	G	G	0.1026	4	35	-0.6313	8.4716e-10	-
N-acetylglutamate	15720	3L_12705300_SNP	Intergenic	Intergenic	Intergenic		T	G	G	0.1026	4	35	-0.6313	8.4716e-10	-
N-acetylglutamate	15720	3L_20315134_SNP	FBgn0036969	Spn77Bb	INTRON	0	T	A	A	0.1212	4	29	-0.6358	1.05035e-09	-
N-acetylglutamate	15720	3L_20315134_SNP	FBgn0036972	CG6434	DOWNSTREAM	343	T	A	A	0.1212	4	29	-0.6358	1.05035e-09	-
N-acetylglutamate	15720	2R_8631012_SNP	FBgn0261545	CG42663	INTRON	0	A	G	A	0.1026	4	35	-0.6237	1.85009e-09	(TF_binding_site|BDTNP1_TFBS_da|FBsf0000324005);(TF_binding_site|BDTNP1_TFBS_dl|FBsf0000301699);(TF_binding_site|BDTNP1_TFBS_twi|FBsf0000199185);(TF_binding_site|mE1_TFBS_HSA|FBsf0000356097);(TF_binding_site|mE1_TFBS_Trl|FBsf0000338469)
N-acetylglutamate	15720	3R_14812574_SNP	FBgn0026239	gukh	INTRON	0	G	T	T	0.1143	4	31	-0.627	2.01458e-09	(TF_binding_site|BDTNP1_TFBS_da|FBsf0000329757);(TF_binding_site|BDTNP1_TFBS_dl|FBsf0000312724);(TF_binding_site|BDTNP1_TFBS_hb|FBsf0000292611);(TF_binding_site|BDTNP1_TFBS_sna|FBsf0000271142);(TF_binding_site|BDTNP1_TFBS_twi|FBsf0000265439);(TF_binding_site|mE1_TFBS_HSA|FBsf0000373032)
N-acetylglutamate	15720	3R_21711092_SNP	FBgn0039381	SppL	INTRON	0	A	T	T	0.1	4	36	-0.6196	2.53347e-09	(TF_binding_site|BDTNP1_TFBS_da|FBsf0000330497)
N-acetylglutamate	15720	3R_10217782_SNP	FBgn0086901	cv-c	UTR_3_PRIME	0	C	T	T	0.1351	5	32	-0.5638	2.95973e-09	(TF_binding_site|mE1_TFBS_zfh1|FBsf0000334995)
N-acetylglutamate	15720	3L_14952607_SNP	Intergenic	Intergenic	Intergenic		T	G	G	0.1471	5	29	-0.5672	3.16963e-09	(TF_binding_site|BDTNP1_TFBS_da|FBsf0000327108);(TF_binding_site|BDTNP1_TFBS_dl|FBsf0000307561);(TF_binding_site|BDTNP1_TFBS_hb|FBsf0000291438);(TF_binding_site|BDTNP1_TFBS_Med|FBsf0000283159);(TF_binding_site|BDTNP1_TFBS_slp1|FBsf0000272625);(TF_binding_site|BDTNP1_TFBS_twi|FBsf0000203847);(TF_binding_site|mE1_TFBS_HSA|FBsf0000365342)
N-acetylglutamate	15720	3L_18815230_SNP	FBgn0036815	HipHop	UTR_3_PRIME	0	C	T	T	0.1081	4	33	-0.6164	4.50033e-09	(regulatory_region|REDfly_CRMs|FBsf0000436107);(TF_binding_site|BDTNP1_TFBS_dl|FBsf0000308465)
N-acetylglutamate	15720	3L_18815230_SNP	FBgn0000261	Cat	UPSTREAM	474	C	T	T	0.1081	4	33	-0.6164	4.50033e-09	(regulatory_region|REDfly_CRMs|FBsf0000436107);(TF_binding_site|BDTNP1_TFBS_dl|FBsf0000308465)
N-acetylglutamate	15720	3R_11072210_INS	FBgn0266599	Hsc70-4	UTR_3_PRIME	0	TCATTTAT	T	T	0.1026	4	35	-0.6136	4.88873e-09	(TF_binding_site|mE1_TFBS_cad|FBsf0000248416);(TF_binding_site|mE1_TFBS_chinmo|FBsf0000212714)
N-acetylglutamate	15720	3R_11072210_INS	FBgn0038309	CG6499	DOWNSTREAM	674	TCATTTAT	T	T	0.1026	4	35	-0.6136	4.88873e-09	(TF_binding_site|mE1_TFBS_cad|FBsf0000248416);(TF_binding_site|mE1_TFBS_chinmo|FBsf0000212714)
N-acetylglutamate	15720	3L_10518960_SNP	FBgn0052062	A2bp1	INTRON	0	G	T	T	0.1282	5	34	-0.5547	6.07049e-09	(TF_binding_site|BDTNP1_TFBS_da|FBsf0000326567);(TF_binding_site|BDTNP1_TFBS_dl|FBsf0000306672);(TF_binding_site|BDTNP1_TFBS_Med|FBsf0000282687);(TF_binding_site|BDTNP1_TFBS_prd|FBsf0000275497);(TF_binding_site|BDTNP1_TFBS_twi|FBsf0000203407);(TF_binding_site|mE1_TFBS_HSA|FBsf0000363943)
N-acetylglutamate	15720	2L_1784009_SNP	FBgn0045497	Gr22e	UPSTREAM	53	T	C	C	0.1	4	36	-0.6061	8.99636e-09	(regulatory_region|REDfly_CRMs|FBsf0000435471);(TF_binding_site|mE1_TFBS_cad|FBsf0000241125)
N-acetylglutamate	15720	3L_6584112_SNP	FBgn0042185	CG18769	INTRON	0	A	T	T	0.1	4	36	-0.6061	8.99636e-09	-
N-acetylglutamate	15720	2L_15543175_SNP	Intergenic	Intergenic	Intergenic		A	T	T	0.125	5	35	-0.5473	1.1684e-08	-
N-acetylglutamate	15720	2L_15549826_SNP	FBgn0267292	CR45728	UPSTREAM	43	G	C	C	0.125	5	35	-0.5473	1.1684e-08	-
N-acetylglutamate	15720	2L_15549826_SNP	FBgn0028880	CG15256	UPSTREAM	546	G	C	C	0.125	5	35	-0.5473	1.1684e-08	-
N-acetylglutamate	15720	3L_13831274_SNP	FBgn0262813	CG43184	DOWNSTREAM	94	G	T	T	0.1351	5	32	-0.5478	1.50856e-08	(TF_binding_site|BDTNP1_TFBS_bcd|FBsf0000333880);(TF_binding_site|BDTNP1_TFBS_dl|FBsf0000307294);(TF_binding_site|BDTNP1_TFBS_twi|FBsf0000203732);(TF_binding_site|mE1_TFBS_HSA|FBsf0000364974)
N-acetylglutamate	15720	2L_20670370_SNP	FBgn0051678	CG31678	INTRON	0	G	C	C	0.1282	5	34	-0.5445	1.68646e-08	-
N-acetylglutamate	15720	3L_9290960_SNP	Intergenic	Intergenic	Intergenic		G	C	C	0.1	4	36	-0.5965	2.08525e-08	-
N-acetylglutamate	15720	3R_18879874_SNP	FBgn0039044	p53	UPSTREAM	70	A	G	G	0.1	4	36	-0.5965	2.08525e-08	(TF_binding_site|BDTNP1_TFBS_dl|FBsf0000313509);(TF_binding_site|BDTNP1_TFBS_prd|FBsf0000276774);(TF_binding_site|mE1_TFBS_HSA|FBsf0000374331);(TF_binding_site|mE1_TFBS_run|FBsf0000336018);(TF_binding_site|mE1_TFBS_Ubx|FBsf0000262823)
N-acetylglutamate	15720	3R_18879874_SNP	FBgn0039045	CG17119	DOWNSTREAM	258	A	G	G	0.1	4	36	-0.5965	2.08525e-08	(TF_binding_site|BDTNP1_TFBS_dl|FBsf0000313509);(TF_binding_site|BDTNP1_TFBS_prd|FBsf0000276774);(TF_binding_site|mE1_TFBS_HSA|FBsf0000374331);(TF_binding_site|mE1_TFBS_run|FBsf0000336018);(TF_binding_site|mE1_TFBS_Ubx|FBsf0000262823)
N-acetylglutamate	15720	2R_13351809_SNP	FBgn0028953	CG14478	UTR_3_PRIME	0	T	C	C	0.1026	4	35	-0.5962	2.3102e-08	(TF_binding_site|mE1_TFBS_chinmo|FBsf0000211476)
N-acetylglutamate	15720	3L_11897262_SNP	FBgn0266100	CG44837	INTRON	0	G	C	C	0.1026	4	35	-0.5962	2.3102e-08	-
N-acetylglutamate	15720	3L_11914707_SNP	FBgn0266100	CG44837	INTRON	0	T	G	G	0.1026	4	35	-0.5962	2.3102e-08	(TF_binding_site|mE1_TFBS_cad|FBsf0000244790)
N-acetylglutamate	15720	3L_11914707_SNP	FBgn0036221	CG11588	UTR_5_PRIME	0	T	G	G	0.1026	4	35	-0.5962	2.3102e-08	(TF_binding_site|mE1_TFBS_cad|FBsf0000244790)
N-acetylglutamate	15720	X_2320169_SNP	FBgn0052797	CG32797	UPSTREAM	281	A	G	G	0.125	5	35	-0.5404	2.80637e-08	(transposable_element|FlyBase|FBti0063994)
N-acetylglutamate	15720	X_2320169_SNP	FBgn0001150	gt	DOWNSTREAM	977	A	G	G	0.125	5	35	-0.5404	2.80637e-08	(transposable_element|FlyBase|FBti0063994)
N-acetylglutamate	15720	3L_13137395_SNP	Intergenic	Intergenic	Intergenic		G	A	A	0.1026	4	35	-0.5938	2.80843e-08	-
N-acetylglutamate	15720	X_21440977_SNP	Intergenic	Intergenic	Intergenic		A	T	T	0.125	5	35	-0.5387	2.81492e-08	-
N-acetylglutamine	33943	2L_1315109_SNP	Intergenic	Intergenic	Intergenic		T	G	G	0.1053	4	34	-0.696	8.8697e-10	(TF_binding_site|BDTNP1_TFBS_twi|FBsf0000200559)
N-acetylglutamine	33943	3R_13643247_SNP	FBgn0261649	tinc	INTRON	0	C	T	T	0.1111	4	32	-0.6382	1.27691e-08	-
N-acetylglutamine	33943	2L_8605917_SNP	FBgn0011259	Sema-1a	INTRON	0	T	C	C	0.15	6	34	-0.5303	1.82226e-08	-
N-acetylglutamine	33943	2L_8607580_SNP	FBgn0011259	Sema-1a	INTRON	0	T	C	C	0.1	4	36	-0.6288	2.38076e-08	-
N-acetylglutamine	33943	2L_8607581_DEL	FBgn0011259	Sema-1a	INTRON	0	T	TGAGTGGCGCA	TGAGTGGCGCA	0.1	4	36	-0.6288	2.38076e-08	-
N-acetylglutamine	33943	2L_8607595_DEL	FBgn0011259	Sema-1a	INTRON	0	T	TGGTGGGTG	TGGTGGGTG	0.1	4	36	-0.6288	2.38076e-08	-
N-acetylglutamine	33943	2L_8607607_SNP	FBgn0011259	Sema-1a	INTRON	0	C	G	G	0.1	4	36	-0.6288	2.38076e-08	-
N-acetylglutamine	33943	3L_10039434_SNP	FBgn0040823	dpr6	INTRON	0	G	A	A	0.1053	4	34	-0.6292	2.72533e-08	-
N-acetylglutamine	33943	3L_21171592_SNP	FBgn0021760	chb	SYNONYMOUS_CODING	0	T	C	C	0.1053	4	34	-0.6292	2.72533e-08	(TF_binding_site|BDTNP1_TFBS_dl|FBsf0000308950);(TF_binding_site|mE1_TFBS_cad|FBsf0000245539);(TF_binding_site|mE1_TFBS_HSA|FBsf0000367433);(TF_binding_site|mE1_TFBS_sens|FBsf0000225567)
N-acetylglutamine	33943	3L_21180148_SNP	FBgn0259239	CG42337	INTRON	0	T	C	C	0.1053	4	34	-0.6292	2.72533e-08	(TF_binding_site|mE1_TFBS_Trl|FBsf0000340410)
N-acetylhistamine	48679	3R_14038058_SNP	FBgn0028499	CG7985	INTRON	0	G	C	C	0.1053	4	34	-0.09976	1.0481e-11	-
N-acetylhistamine	48679	2L_13125396_SNP	Intergenic	Intergenic	Intergenic		A	G	G	0.1282	5	34	-0.08762	1.473e-10	-
N-acetylhistamine	48679	3L_9221189_SNP	Intergenic	Intergenic	Intergenic		C	G	G	0.125	5	35	-0.08738	2.4947e-10	-
N-acetylhistamine	48679	X_16985591_SNP	FBgn0030817	CG4991	UPSTREAM	296	A	G	A	0.1176	4	30	-0.09613	3.2304e-10	(TF_binding_site|BDTNP1_TFBS_dl|FBsf0000319710);(TF_binding_site|mE1_TFBS_HSA|FBsf0000348750);(TF_binding_site|mE1_TFBS_Trl|FBsf0000343106)
N-acetylhistamine	48679	X_16985591_SNP	FBgn0030816	CG16700	UPSTREAM	296	A	G	A	0.1176	4	30	-0.09613	3.2304e-10	(TF_binding_site|BDTNP1_TFBS_dl|FBsf0000319710);(TF_binding_site|mE1_TFBS_HSA|FBsf0000348750);(TF_binding_site|mE1_TFBS_Trl|FBsf0000343106)
N-acetylhistamine	48679	X_16985518_SNP	FBgn0030816	CG16700	UPSTREAM	369	G	A	G	0.1053	4	34	-0.09548	3.3951e-10	(TF_binding_site|BDTNP1_TFBS_dl|FBsf0000319710)
N-acetylhistamine	48679	X_16985518_SNP	FBgn0030817	CG4991	UPSTREAM	369	G	A	G	0.1053	4	34	-0.09548	3.3951e-10	(TF_binding_site|BDTNP1_TFBS_dl|FBsf0000319710)
N-acetylhistamine	48679	2L_8715152_SNP	FBgn0003209	raw	INTRON	0	T	C	C	0.1053	4	34	-0.0955	3.4759e-10	-
N-acetylhistamine	48679	X_16985537_SNP	FBgn0030817	CG4991	UPSTREAM	350	C	A	C	0.1026	4	35	-0.0952	3.682e-10	(TF_binding_site|BDTNP1_TFBS_dl|FBsf0000319710);(TF_binding_site|mE1_TFBS_HSA|FBsf0000348750)
N-acetylhistamine	48679	X_16985537_SNP	FBgn0030816	CG16700	UPSTREAM	350	C	A	C	0.1026	4	35	-0.0952	3.682e-10	(TF_binding_site|BDTNP1_TFBS_dl|FBsf0000319710);(TF_binding_site|mE1_TFBS_HSA|FBsf0000348750)
N-acetylhistamine	48679	X_16985710_SNP	FBgn0030817	CG4991	UPSTREAM	177	A	C	C	0.1026	4	35	-0.0952	3.682e-10	(TF_binding_site|BDTNP1_TFBS_dl|FBsf0000319710);(TF_binding_site|mE1_TFBS_HSA|FBsf0000348750);(TF_binding_site|mE1_TFBS_Trl|FBsf0000343106)
N-acetylhistamine	48679	X_16985710_SNP	FBgn0030816	CG16700	UPSTREAM	177	A	C	C	0.1026	4	35	-0.0952	3.682e-10	(TF_binding_site|BDTNP1_TFBS_dl|FBsf0000319710);(TF_binding_site|mE1_TFBS_HSA|FBsf0000348750);(TF_binding_site|mE1_TFBS_Trl|FBsf0000343106)
N-acetylhistamine	48679	3R_14215490_SNP	FBgn0038613	Vha100-4	UTR_5_PRIME	0	A	G	G	0.1	4	36	-0.09539	3.7328e-10	(TF_binding_site|mE1_TFBS_cad|FBsf0000248689)
N-acetylhistamine	48679	3R_14215490_SNP	FBgn0028670	Vha100-2	DOWNSTREAM	555	A	G	G	0.1	4	36	-0.09539	3.7328e-10	(TF_binding_site|mE1_TFBS_cad|FBsf0000248689)
N-acetylhistamine	48679	3R_14215570_SNP	FBgn0038613	Vha100-4	UPSTREAM	43	T	A	A	0.1	4	36	-0.09539	3.7328e-10	(TF_binding_site|mE1_TFBS_cad|FBsf0000248689)
N-acetylhistamine	48679	3R_14215570_SNP	FBgn0028670	Vha100-2	DOWNSTREAM	475	T	A	A	0.1	4	36	-0.09539	3.7328e-10	(TF_binding_site|mE1_TFBS_cad|FBsf0000248689)
N-acetylhistamine	48679	X_5350580_SNP	FBgn0029768	SPR	INTRON	0	G	A	A	0.1	4	36	-0.0943	6.5783e-10	-
N-acetylhistamine	48679	3R_25093780_DEL	Intergenic	Intergenic	Intergenic		G	GCGG	GCGG	0.1143	4	31	-0.0936	1.71059e-09	(regulatory_region|REDfly_CRMs|FBsf0000435857);(regulatory_region|REDfly_CRMs|FBsf0000436229)
N-acetylhistamine	48679	X_16985619_SNP	FBgn0030816	CG16700	UPSTREAM	268	A	G	A	0.1081	4	33	-0.09311	2.02491e-09	(TF_binding_site|BDTNP1_TFBS_dl|FBsf0000319710);(TF_binding_site|mE1_TFBS_HSA|FBsf0000348750);(TF_binding_site|mE1_TFBS_Trl|FBsf0000343106)
N-acetylhistamine	48679	X_16985619_SNP	FBgn0030817	CG4991	UPSTREAM	268	A	G	A	0.1081	4	33	-0.09311	2.02491e-09	(TF_binding_site|BDTNP1_TFBS_dl|FBsf0000319710);(TF_binding_site|mE1_TFBS_HSA|FBsf0000348750);(TF_binding_site|mE1_TFBS_Trl|FBsf0000343106)
N-acetylhistamine	48679	X_20413192_SNP	FBgn0259162	RunxB	INTRON	0	T	C	C	0.1	4	36	-0.09075	8.81815e-09	-
N-acetylhistamine	48679	3R_14170665_SNP	FBgn0038606	CG15803	INTRON	0	C	T	T	0.1111	4	32	-0.09124	9.45394e-09	-
N-acetylhistamine	48679	2L_12123261_SNP	FBgn0032414	CG17211	INTRON	0	T	C	C	0.1026	4	35	-0.08875	2.16512e-08	-
N-acetylhistamine	48679	2L_12123279_DEL	FBgn0032414	CG17211	INTRON	0	A	ATATATAGATATT	ATATATAGATATT	0.1026	4	35	-0.08875	2.16512e-08	-
N-acetylhistamine	48679	2L_12123278_SNP	FBgn0032414	CG17211	INTRON	0	A	G	G	0.1053	4	34	-0.0885	2.6681e-08	-
N-acetylhistamine	48679	3L_3142917_SNP	FBgn0035400	CG11537	UTR_5_PRIME	0	A	C	C	0.1053	4	34	-0.08934	2.88083e-08	(TF_binding_site|BDTNP1_TFBS_dl|FBsf0000305320);(TF_binding_site|BDTNP1_TFBS_twi|FBsf0000202817);(TF_binding_site|mE1_TFBS_HSA|FBsf0000361705);(TF_binding_site|mE1_TFBS_sens|FBsf0000222748)
N-acetylhistamine	48679	3L_3142917_SNP	FBgn0035401	CG1291	UPSTREAM	891	A	C	C	0.1053	4	34	-0.08934	2.88083e-08	(TF_binding_site|BDTNP1_TFBS_dl|FBsf0000305320);(TF_binding_site|BDTNP1_TFBS_twi|FBsf0000202817);(TF_binding_site|mE1_TFBS_HSA|FBsf0000361705);(TF_binding_site|mE1_TFBS_sens|FBsf0000222748)
N-acetylmethionine sulfoxide	45428	X_19174841_SNP	FBgn0031011	CG8034	DOWNSTREAM	424	T	C	C	0.1282	5	34	-0.9619	1.14815e-09	-
N-acetylmethionine sulfoxide	45428	X_19174841_SNP	FBgn0031010	CG8028	UPSTREAM	459	T	C	C	0.1282	5	34	-0.9619	1.14815e-09	-
N-acetylmethionine sulfoxide	45428	3R_19630398_SNP	FBgn0085384	CG34355	INTRON	0	T	G	G	0.1026	4	35	-1.013	1.62472e-09	-
N-acetylmethionine sulfoxide	45428	3R_19630398_SNP	FBgn0053111	CG33111	INTRON	0	T	G	G	0.1026	4	35	-1.013	1.62472e-09	-
N-acetylmethionine sulfoxide	45428	3L_80877_SNP	Intergenic	Intergenic	Intergenic		C	T	T	0.1176	4	30	-1.015	1.73392e-09	-
N-acetylmethionine sulfoxide	45428	2R_4749725_DEL	FBgn0011286	RyR	INTRON	0	T	TT	TT	0.1081	4	33	-1.01	2.03805e-09	(TF_binding_site|BDTNP1_TFBS_da|FBsf0000323541);(TF_binding_site|BDTNP1_TFBS_dl|FBsf0000300742);(TF_binding_site|BDTNP1_TFBS_Med|FBsf0000279594);(TF_binding_site|BDTNP1_TFBS_slp1|FBsf0000272024);(TF_binding_site|BDTNP1_TFBS_twi|FBsf0000198776);(TF_binding_site|mE1_TFBS_HSA|FBsf0000354697);(TF_binding_site|mE1_TFBS_Trl|FBsf0000338145)
N-acetylmethionine sulfoxide	45428	2R_4741175_SNP	FBgn0024189	sns	UTR_3_PRIME	0	A	T	T	0.1026	4	35	-1.006	2.40174e-09	(TF_binding_site|BDTNP1_TFBS_hb|FBsf0000290003);(TF_binding_site|mE1_TFBS_HSA|FBsf0000354694)
N-acetylmethionine sulfoxide	45428	2L_7359146_SNP	Intergenic	Intergenic	Intergenic		A	G	G	0.1081	4	33	-1.049	2.65283e-09	(TF_binding_site|mE1_TFBS_HSA|FBsf0000346408);(TF_binding_site|mE1_TFBS_sens|FBsf0000216612)
N-acetylmethionine sulfoxide	45428	X_4983566_INS	FBgn0029746	CG15465	UTR_5_PRIME	0	C	CAACAACAGC	C	0.1429	5	30	-0.9409	7.20301e-09	(TF_binding_site|BDTNP1_TFBS_dl|FBsf0000316709);(TF_binding_site|mE1_TFBS_HSA|FBsf0000379402)
N-acetylmethionine sulfoxide	45428	X_4983566_INS	FBgn0266098	rg	UTR_5_PRIME	0	C	CAACAACAGC	C	0.1429	5	30	-0.9409	7.20301e-09	(TF_binding_site|BDTNP1_TFBS_dl|FBsf0000316709);(TF_binding_site|mE1_TFBS_HSA|FBsf0000379402)
N-acetylmethionine sulfoxide	45428	3L_3646379_INS	FBgn0263239	dar1	CODON_CHANGE_PLUS_CODON_INSERTION	0	A	AGCA	A	0.2059	7	27	-0.8242	8.21741e-09	(TF_binding_site|BDTNP1_TFBS_da|FBsf0000325973);(TF_binding_site|BDTNP1_TFBS_dl|FBsf0000305434);(TF_binding_site|BDTNP1_TFBS_twi|FBsf0000202865);(TF_binding_site|mE1_TFBS_chinmo|FBsf0000209710);(TF_binding_site|mE1_TFBS_HSA|FBsf0000361878);(TF_binding_site|mE1_TFBS_inv|FBsf0000235727)
N-acetylmethionine sulfoxide	45428	3R_18106371_SNP	FBgn0051163	SKIP	INTRON	0	G	C	C	0.1538	6	33	-0.8501	2.31977e-08	-
N-acetylthreonine	33939	2L_1315109_SNP	Intergenic	Intergenic	Intergenic		T	G	G	0.1053	4	34	-0.8014	2.0021e-11	(TF_binding_site|BDTNP1_TFBS_twi|FBsf0000200559)
N-acetylthreonine	33939	2R_20011753_SNP	FBgn0264299	CG43777	NON_SYNONYMOUS_CODING	0	C	T	T	0.1	4	36	-0.7729	1.69834e-09	(TF_binding_site|mE1_TFBS_cad|FBsf0000247421);(TF_binding_site|mE1_TFBS_chinmo|FBsf0000211997)
N-acetylthreonine	33939	2R_20011753_SNP	FBgn0264298	CG43776	UTR_3_PRIME	0	C	T	T	0.1	4	36	-0.7729	1.69834e-09	(TF_binding_site|mE1_TFBS_cad|FBsf0000247421);(TF_binding_site|mE1_TFBS_chinmo|FBsf0000211997)
N-acetylthreonine	33939	2R_20011753_SNP	FBgn0264297	CG43775	UTR_3_PRIME	0	C	T	T	0.1	4	36	-0.7729	1.69834e-09	(TF_binding_site|mE1_TFBS_cad|FBsf0000247421);(TF_binding_site|mE1_TFBS_chinmo|FBsf0000211997)
N-acetylthreonine	33939	2R_20011753_SNP	FBgn0034978	CG3257	DOWNSTREAM	967	C	T	T	0.1	4	36	-0.7729	1.69834e-09	(TF_binding_site|mE1_TFBS_cad|FBsf0000247421);(TF_binding_site|mE1_TFBS_chinmo|FBsf0000211997)
N-acetylthreonine	33939	2L_16956476_SNP	Intergenic	Intergenic	Intergenic		T	G	G	0.1026	4	35	-0.7737	1.74069e-09	(TF_binding_site|mE1_TFBS_HSA|FBsf0000351790);(TF_binding_site|mE1_TFBS_sbb|FBsf0000249975)
N-acetylthreonine	33939	3R_19757726_SNP	FBgn0039128	CG13599	INTRON	0	G	C	C	0.2564	10	29	-0.5335	2.78134e-09	(TF_binding_site|BDTNP1_TFBS_dl|FBsf0000313708);(TF_binding_site|BDTNP1_TFBS_Med|FBsf0000286361);(TF_binding_site|mE1_TFBS_cnc|FBsf0000206703);(TF_binding_site|mE1_TFBS_HSA|FBsf0000374641)
N-acetylthreonine	33939	3R_19757726_SNP	FBgn0015282	Rpt2	UPSTREAM	446	G	C	C	0.2564	10	29	-0.5335	2.78134e-09	(TF_binding_site|BDTNP1_TFBS_dl|FBsf0000313708);(TF_binding_site|BDTNP1_TFBS_Med|FBsf0000286361);(TF_binding_site|mE1_TFBS_cnc|FBsf0000206703);(TF_binding_site|mE1_TFBS_HSA|FBsf0000374641)
N-acetylthreonine	33939	3R_19757726_SNP	FBgn0039129	RpS19b	DOWNSTREAM	725	G	C	C	0.2564	10	29	-0.5335	2.78134e-09	(TF_binding_site|BDTNP1_TFBS_dl|FBsf0000313708);(TF_binding_site|BDTNP1_TFBS_Med|FBsf0000286361);(TF_binding_site|mE1_TFBS_cnc|FBsf0000206703);(TF_binding_site|mE1_TFBS_HSA|FBsf0000374641)
N-acetylthreonine	33939	2R_14721107_INS	FBgn0034398	CG15098	UTR_3_PRIME	0	A	AA	A	0.1176	4	30	-0.771	3.58931e-09	-
N-acetylthreonine	33939	2R_14721107_INS	FBgn0034397	CG15082	DOWNSTREAM	362	A	AA	A	0.1176	4	30	-0.771	3.58931e-09	-
N-acetylthreonine	33939	3R_19757721_DEL	FBgn0039128	CG13599	INTRON	0	G	GG	GG	0.2368	9	29	-0.5338	2.38618e-08	(TF_binding_site|BDTNP1_TFBS_dl|FBsf0000313708);(TF_binding_site|BDTNP1_TFBS_Med|FBsf0000286361);(TF_binding_site|mE1_TFBS_cnc|FBsf0000206703);(TF_binding_site|mE1_TFBS_HSA|FBsf0000374641)
N-acetylthreonine	33939	3R_19757721_DEL	FBgn0015282	Rpt2	UPSTREAM	442	G	GG	GG	0.2368	9	29	-0.5338	2.38618e-08	(TF_binding_site|BDTNP1_TFBS_dl|FBsf0000313708);(TF_binding_site|BDTNP1_TFBS_Med|FBsf0000286361);(TF_binding_site|mE1_TFBS_cnc|FBsf0000206703);(TF_binding_site|mE1_TFBS_HSA|FBsf0000374641)
N-acetylthreonine	33939	3R_19757721_DEL	FBgn0039129	RpS19b	DOWNSTREAM	729	G	GG	GG	0.2368	9	29	-0.5338	2.38618e-08	(TF_binding_site|BDTNP1_TFBS_dl|FBsf0000313708);(TF_binding_site|BDTNP1_TFBS_Med|FBsf0000286361);(TF_binding_site|mE1_TFBS_cnc|FBsf0000206703);(TF_binding_site|mE1_TFBS_HSA|FBsf0000374641)
nicotinate	1504	3R_13643247_SNP	FBgn0261649	tinc	INTRON	0	C	T	T	0.1111	4	32	-0.5583	5.9322e-09	-
nicotinate	1504	2L_6572135_DEL	FBgn0031835	CG11319	INTRON	0	G	GTCCGCTTTG	GTCCGCTTTG	0.1282	5	34	-0.4926	2.66508e-08	-
nicotinate ribonucleoside	33471	X_10436856_SNP	FBgn0085443	spri	INTRON	0	T	G	G	0.1111	4	32	-1.348	7.56248e-09	-
oleoylcholine	53260	3L_10429246_SNP	Intergenic	Intergenic	Intergenic		A	T	A	0.1053	4	34	-1.166	2.4762e-13	-
oleoylcholine	53260	3R_24204509_DEL	Intergenic	Intergenic	Intergenic		A	ACACACATA	ACACACATA	0.1026	4	35	-1.157	5.595e-13	-
oleoylcholine	53260	2L_6230408_SNP	Intergenic	Intergenic	Intergenic		G	A	A	0.1	4	36	-1.151	8.4918e-13	(TF_binding_site|BDTNP1_TFBS_Med|FBsf0000277737);(TF_binding_site|BDTNP1_TFBS_twi|FBsf0000201007);(TF_binding_site|mE1_TFBS_HSA|FBsf0000345978)
oleoylcholine	53260	3L_6701619_SNP	FBgn0035711	CG8519	INTRON	0	T	A	A	0.1	4	36	-1.151	8.4918e-13	-
oleoylcholine	53260	3L_6701633_SNP	FBgn0035711	CG8519	INTRON	0	T	A	A	0.1	4	36	-1.151	8.4918e-13	-
oleoylcholine	53260	3R_10830882_SNP	FBgn0267159	CR45599	UPSTREAM	218	A	G	G	0.1	4	36	-1.151	8.4918e-13	-
oleoylcholine	53260	3R_20380173_SNP	FBgn0266758	Esyt2	INTRON	0	G	T	T	0.1	4	36	-1.151	8.4918e-13	(TF_binding_site|BDTNP1_TFBS_dl|FBsf0000313843)
oleoylcholine	53260	3R_20380173_SNP	FBgn0011845	tRNA:D:96A	UPSTREAM	851	G	T	T	0.1	4	36	-1.151	8.4918e-13	(TF_binding_site|BDTNP1_TFBS_dl|FBsf0000313843)
oleoylcholine	53260	3R_20389611_SNP	FBgn0039209	CG13624	INTRON	0	A	G	G	0.1	4	36	-1.151	8.4918e-13	-
oleoylcholine	53260	3R_24204719_SNP	Intergenic	Intergenic	Intergenic		A	G	G	0.1	4	36	-1.151	8.4918e-13	-
oleoylcholine	53260	3R_24204784_SNP	Intergenic	Intergenic	Intergenic		C	T	T	0.1	4	36	-1.151	8.4918e-13	-
oleoylcholine	53260	3R_24204786_DEL	Intergenic	Intergenic	Intergenic		T	TGTGTGC	TGTGTGC	0.1	4	36	-1.151	8.4918e-13	-
oleoylcholine	53260	3R_26449834_SNP	FBgn0264985	CR44136	DOWNSTREAM	717	A	G	G	0.1	4	36	-1.151	8.4918e-13	-
oleoylcholine	53260	X_7229862_SNP	FBgn0029941	CG1677	INTRON	0	A	T	T	0.1	4	36	-1.151	8.4918e-13	(TF_binding_site|BDTNP1_TFBS_da|FBsf0000332008);(TF_binding_site|BDTNP1_TFBS_dl|FBsf0000317382);(TF_binding_site|BDTNP1_TFBS_twi|FBsf0000205373);(TF_binding_site|BDTNP1_TFBS_z|FBsf0000198195);(TF_binding_site|mE1_TFBS_bab1|FBsf0000214978);(TF_binding_site|mE1_TFBS_cad|FBsf0000243008);(TF_binding_site|mE1_TFBS_zfh1|FBsf0000335157)
oleoylcholine	53260	X_7229862_SNP	FBgn0265457	CR44357	INTRON	0	A	T	T	0.1	4	36	-1.151	8.4918e-13	(TF_binding_site|BDTNP1_TFBS_da|FBsf0000332008);(TF_binding_site|BDTNP1_TFBS_dl|FBsf0000317382);(TF_binding_site|BDTNP1_TFBS_twi|FBsf0000205373);(TF_binding_site|BDTNP1_TFBS_z|FBsf0000198195);(TF_binding_site|mE1_TFBS_bab1|FBsf0000214978);(TF_binding_site|mE1_TFBS_cad|FBsf0000243008);(TF_binding_site|mE1_TFBS_zfh1|FBsf0000335157)
oleoylcholine	53260	X_7230628_SNP	FBgn0029941	CG1677	INTRON	0	A	G	G	0.1	4	36	-1.151	8.4918e-13	(TF_binding_site|BDTNP1_TFBS_da|FBsf0000332008);(TF_binding_site|BDTNP1_TFBS_dl|FBsf0000317383);(TF_binding_site|BDTNP1_TFBS_Med|FBsf0000288046);(TF_binding_site|BDTNP1_TFBS_slp1|FBsf0000273431);(TF_binding_site|BDTNP1_TFBS_twi|FBsf0000205373);(TF_binding_site|BDTNP1_TFBS_z|FBsf0000198196);(TF_binding_site|mE1_TFBS_bab1|FBsf0000214978);(TF_binding_site|mE1_TFBS_cad|FBsf0000243008);(TF_binding_sit…
oleoylcholine	53260	X_7230628_SNP	FBgn0265457	CR44357	INTRON	0	A	G	G	0.1	4	36	-1.151	8.4918e-13	(TF_binding_site|BDTNP1_TFBS_da|FBsf0000332008);(TF_binding_site|BDTNP1_TFBS_dl|FBsf0000317383);(TF_binding_site|BDTNP1_TFBS_Med|FBsf0000288046);(TF_binding_site|BDTNP1_TFBS_slp1|FBsf0000273431);(TF_binding_site|BDTNP1_TFBS_twi|FBsf0000205373);(TF_binding_site|BDTNP1_TFBS_z|FBsf0000198196);(TF_binding_site|mE1_TFBS_bab1|FBsf0000214978);(TF_binding_site|mE1_TFBS_cad|FBsf0000243008);(TF_binding_sit…
oleoylcholine	53260	X_7230628_SNP	FBgn0026144	CBP	UPSTREAM	757	A	G	G	0.1	4	36	-1.151	8.4918e-13	(TF_binding_site|BDTNP1_TFBS_da|FBsf0000332008);(TF_binding_site|BDTNP1_TFBS_dl|FBsf0000317383);(TF_binding_site|BDTNP1_TFBS_Med|FBsf0000288046);(TF_binding_site|BDTNP1_TFBS_slp1|FBsf0000273431);(TF_binding_site|BDTNP1_TFBS_twi|FBsf0000205373);(TF_binding_site|BDTNP1_TFBS_z|FBsf0000198196);(TF_binding_site|mE1_TFBS_bab1|FBsf0000214978);(TF_binding_site|mE1_TFBS_cad|FBsf0000243008);(TF_binding_sit…
oleoylcholine	53260	X_7230966_SNP	FBgn0029941	CG1677	INTRON	0	C	T	T	0.1	4	36	-1.151	8.4918e-13	(TF_binding_site|BDTNP1_TFBS_da|FBsf0000332009);(TF_binding_site|BDTNP1_TFBS_dl|FBsf0000317383);(TF_binding_site|BDTNP1_TFBS_Med|FBsf0000288046);(TF_binding_site|BDTNP1_TFBS_slp1|FBsf0000273431);(TF_binding_site|BDTNP1_TFBS_twi|FBsf0000205374);(TF_binding_site|BDTNP1_TFBS_z|FBsf0000198196);(TF_binding_site|mE1_TFBS_bab1|FBsf0000214978);(TF_binding_site|mE1_TFBS_cad|FBsf0000243008);(TF_binding_sit…
oleoylcholine	53260	X_7230966_SNP	FBgn0265457	CR44357	INTRON	0	C	T	T	0.1	4	36	-1.151	8.4918e-13	(TF_binding_site|BDTNP1_TFBS_da|FBsf0000332009);(TF_binding_site|BDTNP1_TFBS_dl|FBsf0000317383);(TF_binding_site|BDTNP1_TFBS_Med|FBsf0000288046);(TF_binding_site|BDTNP1_TFBS_slp1|FBsf0000273431);(TF_binding_site|BDTNP1_TFBS_twi|FBsf0000205374);(TF_binding_site|BDTNP1_TFBS_z|FBsf0000198196);(TF_binding_site|mE1_TFBS_bab1|FBsf0000214978);(TF_binding_site|mE1_TFBS_cad|FBsf0000243008);(TF_binding_sit…
oleoylcholine	53260	X_7230966_SNP	FBgn0026144	CBP	UPSTREAM	419	C	T	T	0.1	4	36	-1.151	8.4918e-13	(TF_binding_site|BDTNP1_TFBS_da|FBsf0000332009);(TF_binding_site|BDTNP1_TFBS_dl|FBsf0000317383);(TF_binding_site|BDTNP1_TFBS_Med|FBsf0000288046);(TF_binding_site|BDTNP1_TFBS_slp1|FBsf0000273431);(TF_binding_site|BDTNP1_TFBS_twi|FBsf0000205374);(TF_binding_site|BDTNP1_TFBS_z|FBsf0000198196);(TF_binding_site|mE1_TFBS_bab1|FBsf0000214978);(TF_binding_site|mE1_TFBS_cad|FBsf0000243008);(TF_binding_sit…
oleoylcholine	53260	X_7231954_SNP	FBgn0265457	CR44357	INTRON	0	G	C	C	0.1	4	36	-1.151	8.4918e-13	(TF_binding_site|BDTNP1_TFBS_da|FBsf0000332010);(TF_binding_site|BDTNP1_TFBS_dl|FBsf0000317384);(TF_binding_site|BDTNP1_TFBS_hb|FBsf0000291845);(TF_binding_site|BDTNP1_TFBS_Med|FBsf0000288047);(TF_binding_site|BDTNP1_TFBS_twi|FBsf0000205375);(TF_binding_site|BDTNP1_TFBS_z|FBsf0000198197);(TF_binding_site|mE1_TFBS_bab1|FBsf0000214978);(TF_binding_site|mE1_TFBS_cad|FBsf0000243008);(TF_binding_site|…
oleoylcholine	53260	X_7231954_SNP	FBgn0029941	CG1677	INTRON	0	G	C	C	0.1	4	36	-1.151	8.4918e-13	(TF_binding_site|BDTNP1_TFBS_da|FBsf0000332010);(TF_binding_site|BDTNP1_TFBS_dl|FBsf0000317384);(TF_binding_site|BDTNP1_TFBS_hb|FBsf0000291845);(TF_binding_site|BDTNP1_TFBS_Med|FBsf0000288047);(TF_binding_site|BDTNP1_TFBS_twi|FBsf0000205375);(TF_binding_site|BDTNP1_TFBS_z|FBsf0000198197);(TF_binding_site|mE1_TFBS_bab1|FBsf0000214978);(TF_binding_site|mE1_TFBS_cad|FBsf0000243008);(TF_binding_site|…
oleoylcholine	53260	X_7231954_SNP	FBgn0026144	CBP	INTRON	0	G	C	C	0.1	4	36	-1.151	8.4918e-13	(TF_binding_site|BDTNP1_TFBS_da|FBsf0000332010);(TF_binding_site|BDTNP1_TFBS_dl|FBsf0000317384);(TF_binding_site|BDTNP1_TFBS_hb|FBsf0000291845);(TF_binding_site|BDTNP1_TFBS_Med|FBsf0000288047);(TF_binding_site|BDTNP1_TFBS_twi|FBsf0000205375);(TF_binding_site|BDTNP1_TFBS_z|FBsf0000198197);(TF_binding_site|mE1_TFBS_bab1|FBsf0000214978);(TF_binding_site|mE1_TFBS_cad|FBsf0000243008);(TF_binding_site|…
oleoylcholine	53260	X_7233847_INS	FBgn0026144	CBP	INTRON	0	GTT	A	A	0.1	4	36	-1.151	8.4918e-13	(TF_binding_site|BDTNP1_TFBS_dl|FBsf0000317386);(TF_binding_site|BDTNP1_TFBS_hb|FBsf0000291846);(TF_binding_site|mE1_TFBS_bab1|FBsf0000214978);(TF_binding_site|mE1_TFBS_cad|FBsf0000243008);(TF_binding_site|mE1_TFBS_HSA|FBsf0000380230)
oleoylcholine	53260	X_7233847_INS	FBgn0265457	CR44357	INTRON	0	GTT	A	A	0.1	4	36	-1.151	8.4918e-13	(TF_binding_site|BDTNP1_TFBS_dl|FBsf0000317386);(TF_binding_site|BDTNP1_TFBS_hb|FBsf0000291846);(TF_binding_site|mE1_TFBS_bab1|FBsf0000214978);(TF_binding_site|mE1_TFBS_cad|FBsf0000243008);(TF_binding_site|mE1_TFBS_HSA|FBsf0000380230)
oleoylcholine	53260	X_7233847_INS	FBgn0029941	CG1677	INTRON	0	GTT	A	A	0.1	4	36	-1.151	8.4918e-13	(TF_binding_site|BDTNP1_TFBS_dl|FBsf0000317386);(TF_binding_site|BDTNP1_TFBS_hb|FBsf0000291846);(TF_binding_site|mE1_TFBS_bab1|FBsf0000214978);(TF_binding_site|mE1_TFBS_cad|FBsf0000243008);(TF_binding_site|mE1_TFBS_HSA|FBsf0000380230)
oleoylcholine	53260	3R_26482905_SNP	Intergenic	Intergenic	Intergenic		T	G	G	0.1026	4	35	-1.15	1.2707e-12	-
oleoylcholine	53260	2R_9934723_SNP	FBgn0002643	mam	INTRON	0	T	A	A	0.1351	5	32	-1.034	4.5273e-12	-
oleoylcholine	53260	2L_18430227_INS	Intergenic	Intergenic	Intergenic		AA	A	A	0.1316	5	33	-1.03	5.2212e-12	-
oleoylcholine	53260	2R_775173_DEL	Intergenic	Intergenic	Intergenic		A	ATGTTATTAAAAAACCAAACAATTAA	ATGTTATTAAAAAACCAAACAATTAA	0.1282	5	34	-1.024	7.4081e-12	-
oleoylcholine	53260	3R_14462771_SNP	FBgn0038632	CG14301	INTRON	0	T	G	G	0.1282	5	34	-1.022	8.8804e-12	-
oleoylcholine	53260	3R_14462771_SNP	FBgn0263974	qin	INTRON	0	T	G	G	0.1282	5	34	-1.022	8.8804e-12	-
oleoylcholine	53260	3L_14373342_SNP	Intergenic	Intergenic	Intergenic		T	A	A	0.15	6	34	-0.8986	5.2452e-10	-
oleoylcholine	53260	2R_16331666_SNP	FBgn0086604	CG12484	INTRON	0	C	T	T	0.1111	4	32	-1.072	6.6954e-10	(TF_binding_site|mE1_TFBS_HSA|FBsf0000358709);(TF_binding_site|mE1_TFBS_inv|FBsf0000236786)
oleoylcholine	53260	2R_9959044_SNP	FBgn0040752	Prosap	INTRON	0	C	G	G	0.1795	7	32	-0.8526	6.9463e-10	-
oleoylcholine	53260	3L_1372431_SNP	FBgn0003138	Ptp61F	INTRON	0	C	T	T	0.1515	5	28	-1.002	1.17197e-09	-
oleoylcholine	53260	3L_1372431_SNP	FBgn0003295	ru	INTRON	0	C	T	T	0.1515	5	28	-1.002	1.17197e-09	-
oleoylcholine	53260	3L_1372433_SNP	FBgn0003295	ru	INTRON	0	G	T	T	0.1515	5	28	-1.002	1.17197e-09	-
oleoylcholine	53260	3L_1372433_SNP	FBgn0003138	Ptp61F	INTRON	0	G	T	T	0.1515	5	28	-1.002	1.17197e-09	-
oleoylcholine	53260	3L_1372235_SNP	FBgn0003295	ru	INTRON	0	A	C	C	0.1282	5	34	-0.9866	1.37697e-09	-
oleoylcholine	53260	3L_1372235_SNP	FBgn0003138	Ptp61F	INTRON	0	A	C	C	0.1282	5	34	-0.9866	1.37697e-09	-
oleoylcholine	53260	3L_7985585_SNP	FBgn0011817	nmo	INTRON	0	T	A	A	0.1282	5	34	-0.9862	1.44911e-09	(TF_binding_site|BDTNP1_TFBS_da|FBsf0000326345);(TF_binding_site|BDTNP1_TFBS_dl|FBsf0000306151);(TF_binding_site|BDTNP1_TFBS_Med|FBsf0000282434);(TF_binding_site|BDTNP1_TFBS_sna|FBsf0000269203);(TF_binding_site|mE1_TFBS_cad|FBsf0000244459);(TF_binding_site|mE1_TFBS_HSA|FBsf0000363148)
oleoylcholine	53260	X_13254803_SNP	FBgn0261085	Syt12	INTRON	0	G	A	A	0.1081	4	33	-1.058	1.50572e-09	-
oleoylcholine	53260	X_13254810_INS	FBgn0261085	Syt12	INTRON	0	GTT	G	G	0.1081	4	33	-1.058	1.50572e-09	-
oleoylcholine	53260	3L_6701021_SNP	FBgn0035711	CG8519	INTRON	0	C	T	T	0.15	6	34	-0.8841	1.53739e-09	-
oleoylcholine	53260	3L_6701057_SNP	FBgn0035711	CG8519	INTRON	0	A	G	G	0.15	6	34	-0.8841	1.53739e-09	-
oleoylcholine	53260	3L_6701131_SNP	FBgn0035711	CG8519	INTRON	0	A	T	T	0.15	6	34	-0.8841	1.53739e-09	-
oleoylcholine	53260	3R_26285385_SNP	FBgn0039774	CDase	INTRON	0	A	T	T	0.15	6	34	-0.9036	1.60018e-09	(TF_binding_site|BDTNP1_TFBS_dl|FBsf0000314815);(TF_binding_site|BDTNP1_TFBS_z|FBsf0000197963);(TF_binding_site|mE1_TFBS_Ubx|FBsf0000262917)
oleoylcholine	53260	3R_26285385_SNP	FBgn0039773	CG2224	UPSTREAM	363	A	T	T	0.15	6	34	-0.9036	1.60018e-09	(TF_binding_site|BDTNP1_TFBS_dl|FBsf0000314815);(TF_binding_site|BDTNP1_TFBS_z|FBsf0000197963);(TF_binding_site|mE1_TFBS_Ubx|FBsf0000262917)
oleoylcholine	53260	3L_1372273_SNP	FBgn0003138	Ptp61F	INTRON	0	T	A	A	0.1316	5	33	-0.9867	1.62301e-09	-
oleoylcholine	53260	3L_1372273_SNP	FBgn0003295	ru	INTRON	0	T	A	A	0.1316	5	33	-0.9867	1.62301e-09	-
oleoylcholine	53260	3L_16905993_SNP	FBgn0261565	Lmpt	INTRON	0	T	G	T	0.1622	6	31	-0.8884	1.78339e-09	-
oleoylcholine	53260	3R_26287917_SNP	FBgn0039774	CDase	INTRON	0	C	T	T	0.1538	6	33	-0.904	1.84104e-09	(TF_binding_site|BDTNP1_TFBS_da|FBsf0000330891)
oleoylcholine	53260	X_12731687_SNP	FBgn0259171	Pde9	INTRON	0	A	C	C	0.125	5	35	-0.9813	1.86736e-09	(TF_binding_site|BDTNP1_TFBS_dl|FBsf0000318697);(TF_binding_site|mE1_TFBS_HSA|FBsf0000381965);(TF_binding_site|mE1_TFBS_HSA|FBsf0000381966);(TF_binding_site|mE1_TFBS_inv|FBsf0000235448)
oleoylcholine	53260	3R_11574083_SNP	Intergenic	Intergenic	Intergenic		A	T	T	0.1026	4	35	-1.05	1.92029e-09	-
oleoylcholine	53260	3L_7407089_SNP	Intergenic	Intergenic	Intergenic		T	C	C	0.1795	7	32	-0.8301	1.93163e-09	(TF_binding_site|BDTNP1_TFBS_da|FBsf0000326315);(TF_binding_site|mE1_TFBS_HSA|FBsf0000362957)
oleoylcholine	53260	X_13254696_SNP	FBgn0261085	Syt12	INTRON	0	G	A	A	0.1081	4	33	-1.053	2.00348e-09	-
oleoylcholine	53260	3L_16905994_SNP	FBgn0261565	Lmpt	INTRON	0	C	G	C	0.1667	6	30	-0.8844	2.77952e-09	-
oleoylcholine	53260	3L_16906029_SNP	FBgn0261565	Lmpt	INTRON	0	A	G	A	0.1714	6	29	-0.8851	3.15919e-09	-
oleoylcholine	53260	2R_13957725_SNP	FBgn0085415	CG34386	INTRON	0	A	G	G	0.1081	4	33	-1.044	3.34648e-09	-
oleoylcholine	53260	3R_22771198_SNP	FBgn0039462	CG14252	UPSTREAM	58	G	A	A	0.1143	4	31	-1.048	3.34787e-09	(TF_binding_site|BDTNP1_TFBS_Med|FBsf0000286669);(TF_binding_site|mE1_TFBS_D|FBsf0000240246);(TF_binding_site|mE1_TFBS_HSA|FBsf0000375562)
oleoylcholine	53260	3R_22771198_SNP	FBgn0015541	sda	DOWNSTREAM	167	G	A	A	0.1143	4	31	-1.048	3.34787e-09	(TF_binding_site|BDTNP1_TFBS_Med|FBsf0000286669);(TF_binding_site|mE1_TFBS_D|FBsf0000240246);(TF_binding_site|mE1_TFBS_HSA|FBsf0000375562)
oleoylcholine	53260	2R_5035170_SNP	FBgn0050344	CG30344	SYNONYMOUS_CODING	0	C	T	T	0.15	6	34	-0.8716	3.6783e-09	-
oleoylcholine	53260	X_19058475_SNP	FBgn0261461	RhoGAP18B	SYNONYMOUS_CODING	0	T	C	C	0.1316	5	33	-0.9749	3.70792e-09	-
oleoylcholine	53260	3L_9840550_SNP	FBgn0004390	RasGAP1	INTRON	0	T	A	A	0.1351	5	32	-0.9789	3.81934e-09	-
oleoylcholine	53260	3R_22771073_SNP	FBgn0015541	sda	DOWNSTREAM	42	G	T	T	0.1081	4	33	-1.039	4.30642e-09	(TF_binding_site|BDTNP1_TFBS_Med|FBsf0000286669);(TF_binding_site|mE1_TFBS_HSA|FBsf0000375562)
oleoylcholine	53260	3R_22771073_SNP	FBgn0039462	CG14252	UPSTREAM	183	G	T	T	0.1081	4	33	-1.039	4.30642e-09	(TF_binding_site|BDTNP1_TFBS_Med|FBsf0000286669);(TF_binding_site|mE1_TFBS_HSA|FBsf0000375562)
oleoylcholine	53260	2L_16315684_SNP	FBgn0000250	cact	INTRON	0	T	G	T	0.1143	4	31	-1.043	4.34001e-09	(TF_binding_site|BDTNP1_TFBS_dl|FBsf0000298912);(TF_binding_site|BDTNP1_TFBS_twi|FBsf0000201867)
oleoylcholine	53260	3L_16905996_SNP	FBgn0261565	Lmpt	INTRON	0	T	A	T	0.1667	6	30	-0.8775	4.42518e-09	-
oleoylcholine	53260	3R_14729462_SNP	FBgn0085313	CG34284	UPSTREAM	807	G	A	A	0.15	6	34	-0.8684	4.58074e-09	(TF_binding_site|mE1_TFBS_HSA|FBsf0000373009);(TF_binding_site|mE1_TFBS_sbb|FBsf0000250946)
oleoylcholine	53260	3R_14729464_SNP	FBgn0085313	CG34284	UPSTREAM	809	A	C	C	0.15	6	34	-0.8684	4.58074e-09	(TF_binding_site|mE1_TFBS_HSA|FBsf0000373009);(TF_binding_site|mE1_TFBS_sbb|FBsf0000250946)
oleoylcholine	53260	3R_14729535_SNP	FBgn0085313	CG34284	UPSTREAM	880	C	G	G	0.15	6	34	-0.8684	4.58074e-09	(TF_binding_site|mE1_TFBS_HSA|FBsf0000373009);(TF_binding_site|mE1_TFBS_sbb|FBsf0000250946)
oleoylcholine	53260	2R_11857426_SNP	FBgn0265045	Strn-Mlck	NON_SYNONYMOUS_CODING	0	A	G	A	0.1026	4	35	-1.033	5.02897e-09	(TF_binding_site|mE1_TFBS_HSA|FBsf0000357259);(TF_binding_site|mE1_TFBS_sens|FBsf0000228293)
oleoylcholine	53260	3L_13645465_SNP	FBgn0264001	bru-3	INTRON	0	T	G	G	0.1026	4	35	-1.031	5.60585e-09	-
oleoylcholine	53260	2R_8900017_SNP	Intergenic	Intergenic	Intergenic		T	A	A	0.1026	4	35	-1.03	6.15103e-09	-
oleoylcholine	53260	2R_8900023_SNP	Intergenic	Intergenic	Intergenic		T	C	C	0.1026	4	35	-1.03	6.15103e-09	-
oleoylcholine	53260	2L_18766369_SNP	FBgn0045852	ham	INTRON	0	C	T	T	0.1026	4	35	-1.026	7.62025e-09	-
oleoylcholine	53260	3R_13719033_SNP	FBgn0053547	Rim	INTRON	0	T	C	C	0.1026	4	35	-1.026	7.62025e-09	-
oleoylcholine	53260	2L_14993247_SNP	FBgn0086711	mol	INTRON	0	A	G	G	0.1	4	36	-1.024	7.68182e-09	-
oleoylcholine	53260	2L_16165086_SNP	FBgn0001991	Ca-alpha1D	UPSTREAM	745	C	A	A	0.1	4	36	-1.024	7.68182e-09	-
oleoylcholine	53260	2L_16417405_SNP	FBgn0028523	CG5888	INTRON	0	A	G	G	0.1	4	36	-1.024	7.68182e-09	(TF_binding_site|mE1_TFBS_HSA|FBsf0000351615);(TF_binding_site|mE1_TFBS_inv|FBsf0000234984)
oleoylcholine	53260	2L_16417405_SNP	FBgn0086037	snoRNA:Me28S-A2958	DOWNSTREAM	345	A	G	G	0.1	4	36	-1.024	7.68182e-09	(TF_binding_site|mE1_TFBS_HSA|FBsf0000351615);(TF_binding_site|mE1_TFBS_inv|FBsf0000234984)
oleoylcholine	53260	2L_16417406_SNP	FBgn0028523	CG5888	INTRON	0	A	C	C	0.1	4	36	-1.024	7.68182e-09	(TF_binding_site|mE1_TFBS_HSA|FBsf0000351615);(TF_binding_site|mE1_TFBS_inv|FBsf0000234984)
oleoylcholine	53260	2L_16417406_SNP	FBgn0086037	snoRNA:Me28S-A2958	DOWNSTREAM	344	A	C	C	0.1	4	36	-1.024	7.68182e-09	(TF_binding_site|mE1_TFBS_HSA|FBsf0000351615);(TF_binding_site|mE1_TFBS_inv|FBsf0000234984)
oleoylcholine	53260	2L_16436635_SNP	FBgn0028523	CG5888	INTRON	0	G	T	T	0.1	4	36	-1.024	7.68182e-09	-
oleoylcholine	53260	2L_18766000_DEL	FBgn0045852	ham	INTRON	0	T	TTTT	TTTT	0.1	4	36	-1.024	7.68182e-09	(TF_binding_site|BDTNP1_TFBS_sna|FBsf0000268811);(TF_binding_site|mE1_TFBS_HSA|FBsf0000352234)
oleoylcholine	53260	2L_18766005_INS	FBgn0045852	ham	INTRON	0	AAACTAAC	A	A	0.1	4	36	-1.024	7.68182e-09	(TF_binding_site|BDTNP1_TFBS_sna|FBsf0000268811);(TF_binding_site|mE1_TFBS_HSA|FBsf0000352234)
oleoylcholine	53260	2L_18766221_SNP	FBgn0045852	ham	INTRON	0	A	G	G	0.1	4	36	-1.024	7.68182e-09	-
oleoylcholine	53260	2L_9873493_SNP	FBgn0032151	nAChRalpha6	INTRON	0	T	C	C	0.1	4	36	-1.024	7.68182e-09	-
oleoylcholine	53260	2R_10095334_SNP	FBgn0005613	Sox15	INTRON	0	T	C	C	0.1	4	36	-1.024	7.68182e-09	(regulatory_region|REDfly_CRMs|FBsf0000435238);(regulatory_region|REDfly_CRMs|FBsf0000436289);(silencer|mE1_HDAC_PRE|FBsf0000343458);(TF_binding_site|BDTNP1_TFBS_da|FBsf0000324202);(TF_binding_site|BDTNP1_TFBS_dl|FBsf0000302071);(TF_binding_site|BDTNP1_TFBS_Med|FBsf0000280303);(TF_binding_site|BDTNP1_TFBS_prd|FBsf0000274418);(TF_binding_site|BDTNP1_TFBS_twi|FBsf0000199339);(TF_binding_site|mE1_TF…
oleoylcholine	53260	2R_11838039_SNP	FBgn0265045	Strn-Mlck	INTRON	0	G	C	C	0.1	4	36	-1.024	7.68182e-09	(TF_binding_site|mE1_TFBS_HSA|FBsf0000357251)
oleoylcholine	53260	2R_11866143_SNP	FBgn0265045	Strn-Mlck	SYNONYMOUS_CODING	0	T	C	C	0.1	4	36	-1.024	7.68182e-09	-
oleoylcholine	53260	2R_11868288_SNP	FBgn0265045	Strn-Mlck	SYNONYMOUS_CODING	0	T	C	C	0.1	4	36	-1.024	7.68182e-09	-
oleoylcholine	53260	2R_11870336_SNP	FBgn0265045	Strn-Mlck	NON_SYNONYMOUS_CODING	0	T	C	C	0.1	4	36	-1.024	7.68182e-09	-
oleoylcholine	53260	2R_12553684_SNP	FBgn0024315	Picot	INTRON	0	T	G	T	0.1	4	36	-1.024	7.68182e-09	(TF_binding_site|mE1_TFBS_cad|FBsf0000246826);(TF_binding_site|mE1_TFBS_HSA|FBsf0000357513)
oleoylcholine	53260	2R_1876885_SNP	FBgn0264959	Src42A	INTRON	0	C	T	T	0.1	4	36	-1.024	7.68182e-09	-
oleoylcholine	53260	2R_1949882_SNP	FBgn0033058	CCHa2-R	INTRON	0	T	C	C	0.1	4	36	-1.024	7.68182e-09	-
oleoylcholine	53260	2R_1950313_SNP	FBgn0033058	CCHa2-R	UTR_5_PRIME	0	A	G	G	0.1	4	36	-1.024	7.68182e-09	-
oleoylcholine	53260	2R_2817972_SNP	FBgn0053558	mim	INTRON	0	A	T	T	0.1	4	36	-1.024	7.68182e-09	(TF_binding_site|mE1_TFBS_cad|FBsf0000245929);(TF_binding_site|mE1_TFBS_HSA|FBsf0000353966)
oleoylcholine	53260	2R_3440311_SNP	FBgn0033192	Corin	INTRON	0	T	G	G	0.1	4	36	-1.024	7.68182e-09	-
oleoylcholine	53260	2R_3440326_SNP	FBgn0033192	Corin	INTRON	0	A	C	C	0.1	4	36	-1.024	7.68182e-09	-
oleoylcholine	53260	2R_3597116_SNP	FBgn0033214	CG1941	UPSTREAM	262	C	G	C	0.1	4	36	-1.024	7.68182e-09	(TF_binding_site|mE1_TFBS_HSA|FBsf0000354279);(TF_binding_site|mE1_TFBS_sens|FBsf0000226692)
oleoylcholine	53260	2R_3597116_SNP	FBgn0003733	tor	UPSTREAM	427	C	G	C	0.1	4	36	-1.024	7.68182e-09	(TF_binding_site|mE1_TFBS_HSA|FBsf0000354279);(TF_binding_site|mE1_TFBS_sens|FBsf0000226692)
oleoylcholine	53260	2R_4103119_SNP	FBgn0053087	LRP1	INTRON	0	G	A	A	0.1	4	36	-1.024	7.68182e-09	-
oleoylcholine	53260	2R_4105298_SNP	FBgn0053087	LRP1	SYNONYMOUS_CODING	0	C	T	T	0.1	4	36	-1.024	7.68182e-09	(TF_binding_site|mE1_TFBS_cad|FBsf0000246058);(TF_binding_site|mE1_TFBS_HSA|FBsf0000354472);(TF_binding_site|mE1_TFBS_sens|FBsf0000226813)
oleoylcholine	53260	2R_4114354_SNP	FBgn0053087	LRP1	DOWNSTREAM	411	T	C	C	0.1	4	36	-1.024	7.68182e-09	(TF_binding_site|BDTNP1_TFBS_da|FBsf0000323476);(TF_binding_site|BDTNP1_TFBS_dl|FBsf0000300630);(TF_binding_site|BDTNP1_TFBS_gt|FBsf0000293386);(TF_binding_site|BDTNP1_TFBS_Med|FBsf0000279541);(TF_binding_site|BDTNP1_TFBS_sna|FBsf0000267517);(TF_binding_site|BDTNP1_TFBS_twi|FBsf0000198728);(TF_binding_site|mE1_TFBS_disco|FBsf0000259569);(TF_binding_site|mE1_TFBS_HSA|FBsf0000354476);(TF_binding_si…
oleoylcholine	53260	2R_4118574_SNP	FBgn0010109	dpn	INTRON	0	T	C	C	0.1	4	36	-1.024	7.68182e-09	(TF_binding_site|BDTNP1_TFBS_Med|FBsf0000279543);(TF_binding_site|BDTNP1_TFBS_z|FBsf0000196404);(TF_binding_site|mE1_TFBS_cad|FBsf0000246059);(TF_binding_site|mE1_TFBS_HSA|FBsf0000354477);(TF_binding_site|mE1_TFBS_HSA|FBsf0000354478);(TF_binding_site|mE1_TFBS_sens|FBsf0000226817)
oleoylcholine	53260	2R_4118574_SNP	FBgn0265302	CR44275	DOWNSTREAM	273	T	C	C	0.1	4	36	-1.024	7.68182e-09	(TF_binding_site|BDTNP1_TFBS_Med|FBsf0000279543);(TF_binding_site|BDTNP1_TFBS_z|FBsf0000196404);(TF_binding_site|mE1_TFBS_cad|FBsf0000246059);(TF_binding_site|mE1_TFBS_HSA|FBsf0000354477);(TF_binding_site|mE1_TFBS_HSA|FBsf0000354478);(TF_binding_site|mE1_TFBS_sens|FBsf0000226817)
oleoylcholine	53260	2R_4125488_SNP	FBgn0013726	pnut	UTR_5_PRIME	0	G	A	A	0.1	4	36	-1.024	7.68182e-09	(TF_binding_site|BDTNP1_TFBS_da|FBsf0000323483);(TF_binding_site|BDTNP1_TFBS_dl|FBsf0000300639);(TF_binding_site|BDTNP1_TFBS_Med|FBsf0000279548);(TF_binding_site|BDTNP1_TFBS_prd|FBsf0000274261);(TF_binding_site|BDTNP1_TFBS_tll|FBsf0000266784);(TF_binding_site|BDTNP1_TFBS_twi|FBsf0000198729);(TF_binding_site|BDTNP1_TFBS_z|FBsf0000196409);(TF_binding_site|mE1_TFBS_cad|FBsf0000246061);(TF_binding_si…
oleoylcholine	53260	2R_4346922_SNP	FBgn0033294	Mal-A4	SYNONYMOUS_CODING	0	A	C	C	0.1	4	36	-1.024	7.68182e-09	(TF_binding_site|mE1_TFBS_HSA|FBsf0000354555);(TF_binding_site|mE1_TFBS_inv|FBsf0000236387)
oleoylcholine	53260	2R_4355379_SNP	FBgn0050360	Mal-A6	DOWNSTREAM	279	A	C	C	0.1	4	36	-1.024	7.68182e-09	-
oleoylcholine	53260	2R_4355379_SNP	FBgn0033296	Mal-A7	DOWNSTREAM	772	A	C	C	0.1	4	36	-1.024	7.68182e-09	-
oleoylcholine	53260	2R_791023_SNP	FBgn0264911	CG44102	INTRON	0	A	T	T	0.1	4	36	-1.024	7.68182e-09	(transposable_element|FlyBase|FBti0060923);(transposable_element|FlyBase|FBti0064077)
oleoylcholine	53260	2R_9035836_SNP	FBgn0263998	Ack-like	INTRON	0	G	C	C	0.1	4	36	-1.024	7.68182e-09	(TF_binding_site|mE1_TFBS_cad|FBsf0000246521)
oleoylcholine	53260	2R_9036076_DEL	FBgn0263998	Ack-like	INTRON	0	T	TA	TA	0.1	4	36	-1.024	7.68182e-09	-
oleoylcholine	53260	2R_9036529_SNP	FBgn0263998	Ack-like	SYNONYMOUS_CODING	0	T	C	C	0.1	4	36	-1.024	7.68182e-09	-
oleoylcholine	53260	3L_10428474_SNP	Intergenic	Intergenic	Intergenic		T	G	G	0.1	4	36	-1.024	7.68182e-09	(TF_binding_site|mE1_TFBS_eve|FBsf0000252643);(TF_binding_site|mE1_TFBS_HSA|FBsf0000363917)
oleoylcholine	53260	3L_13200044_SNP	Intergenic	Intergenic	Intergenic		A	G	G	0.1	4	36	-1.024	7.68182e-09	-
oleoylcholine	53260	3L_13200045_SNP	Intergenic	Intergenic	Intergenic		A	C	C	0.1	4	36	-1.024	7.68182e-09	-
oleoylcholine	53260	3L_13254092_SNP	FBgn0023095	caps	INTRON	0	T	C	C	0.1	4	36	-1.024	7.68182e-09	-
oleoylcholine	53260	3R_15638161_SNP	FBgn0014135	bnl	INTRON	0	T	A	A	0.1	4	36	-1.024	7.68182e-09	-
oleoylcholine	53260	3R_22769916_SNP	FBgn0015541	sda	NON_SYNONYMOUS_CODING	0	T	C	T	0.1	4	36	-1.024	7.68182e-09	-
oleoylcholine	53260	3R_22771432_SNP	FBgn0039462	CG14252	INTRON	0	G	T	T	0.1	4	36	-1.024	7.68182e-09	(TF_binding_site|BDTNP1_TFBS_Med|FBsf0000286669);(TF_binding_site|mE1_TFBS_D|FBsf0000240246);(TF_binding_site|mE1_TFBS_HSA|FBsf0000375562)
oleoylcholine	53260	3R_22771432_SNP	FBgn0015541	sda	DOWNSTREAM	401	G	T	T	0.1	4	36	-1.024	7.68182e-09	(TF_binding_site|BDTNP1_TFBS_Med|FBsf0000286669);(TF_binding_site|mE1_TFBS_D|FBsf0000240246);(TF_binding_site|mE1_TFBS_HSA|FBsf0000375562)
oleoylcholine	53260	X_13023299_SNP	FBgn0030451	CG15717	INTRON	0	G	T	T	0.1	4	36	-1.024	7.68182e-09	(TF_binding_site|BDTNP1_TFBS_da|FBsf0000332518);(TF_binding_site|BDTNP1_TFBS_dl|FBsf0000318738);(TF_binding_site|BDTNP1_TFBS_Med|FBsf0000288574);(TF_binding_site|BDTNP1_TFBS_twi|FBsf0000205864);(TF_binding_site|mE1_TFBS_disco|FBsf0000261510);(TF_binding_site|mE1_TFBS_HSA|FBsf0000382025);(TF_binding_site|mE1_TFBS_sens|FBsf0000220772)
oleoylcholine	53260	X_13023299_SNP	FBgn0030452	MFS10	INTRON	0	G	T	T	0.1	4	36	-1.024	7.68182e-09	(TF_binding_site|BDTNP1_TFBS_da|FBsf0000332518);(TF_binding_site|BDTNP1_TFBS_dl|FBsf0000318738);(TF_binding_site|BDTNP1_TFBS_Med|FBsf0000288574);(TF_binding_site|BDTNP1_TFBS_twi|FBsf0000205864);(TF_binding_site|mE1_TFBS_disco|FBsf0000261510);(TF_binding_site|mE1_TFBS_HSA|FBsf0000382025);(TF_binding_site|mE1_TFBS_sens|FBsf0000220772)
oleoylcholine	53260	X_13023299_SNP	FBgn0052638	CG32638	UPSTREAM	472	G	T	T	0.1	4	36	-1.024	7.68182e-09	(TF_binding_site|BDTNP1_TFBS_da|FBsf0000332518);(TF_binding_site|BDTNP1_TFBS_dl|FBsf0000318738);(TF_binding_site|BDTNP1_TFBS_Med|FBsf0000288574);(TF_binding_site|BDTNP1_TFBS_twi|FBsf0000205864);(TF_binding_site|mE1_TFBS_disco|FBsf0000261510);(TF_binding_site|mE1_TFBS_HSA|FBsf0000382025);(TF_binding_site|mE1_TFBS_sens|FBsf0000220772)
oleoylcholine	53260	X_13023299_SNP	FBgn0065101	snmRNA:204	UPSTREAM	636	G	T	T	0.1	4	36	-1.024	7.68182e-09	(TF_binding_site|BDTNP1_TFBS_da|FBsf0000332518);(TF_binding_site|BDTNP1_TFBS_dl|FBsf0000318738);(TF_binding_site|BDTNP1_TFBS_Med|FBsf0000288574);(TF_binding_site|BDTNP1_TFBS_twi|FBsf0000205864);(TF_binding_site|mE1_TFBS_disco|FBsf0000261510);(TF_binding_site|mE1_TFBS_HSA|FBsf0000382025);(TF_binding_site|mE1_TFBS_sens|FBsf0000220772)
oleoylcholine	53260	X_13023301_DEL	FBgn0030452	MFS10	INTRON	0	T	CA	CA	0.1	4	36	-1.024	7.68182e-09	(TF_binding_site|BDTNP1_TFBS_da|FBsf0000332518);(TF_binding_site|BDTNP1_TFBS_dl|FBsf0000318738);(TF_binding_site|BDTNP1_TFBS_Med|FBsf0000288574);(TF_binding_site|BDTNP1_TFBS_twi|FBsf0000205864);(TF_binding_site|mE1_TFBS_disco|FBsf0000261510);(TF_binding_site|mE1_TFBS_HSA|FBsf0000382025);(TF_binding_site|mE1_TFBS_sens|FBsf0000220772)
oleoylcholine	53260	X_13023301_DEL	FBgn0030451	CG15717	INTRON	0	T	CA	CA	0.1	4	36	-1.024	7.68182e-09	(TF_binding_site|BDTNP1_TFBS_da|FBsf0000332518);(TF_binding_site|BDTNP1_TFBS_dl|FBsf0000318738);(TF_binding_site|BDTNP1_TFBS_Med|FBsf0000288574);(TF_binding_site|BDTNP1_TFBS_twi|FBsf0000205864);(TF_binding_site|mE1_TFBS_disco|FBsf0000261510);(TF_binding_site|mE1_TFBS_HSA|FBsf0000382025);(TF_binding_site|mE1_TFBS_sens|FBsf0000220772)
oleoylcholine	53260	X_13023301_DEL	FBgn0052638	CG32638	UPSTREAM	474	T	CA	CA	0.1	4	36	-1.024	7.68182e-09	(TF_binding_site|BDTNP1_TFBS_da|FBsf0000332518);(TF_binding_site|BDTNP1_TFBS_dl|FBsf0000318738);(TF_binding_site|BDTNP1_TFBS_Med|FBsf0000288574);(TF_binding_site|BDTNP1_TFBS_twi|FBsf0000205864);(TF_binding_site|mE1_TFBS_disco|FBsf0000261510);(TF_binding_site|mE1_TFBS_HSA|FBsf0000382025);(TF_binding_site|mE1_TFBS_sens|FBsf0000220772)
oleoylcholine	53260	X_13023301_DEL	FBgn0065101	snmRNA:204	UPSTREAM	638	T	CA	CA	0.1	4	36	-1.024	7.68182e-09	(TF_binding_site|BDTNP1_TFBS_da|FBsf0000332518);(TF_binding_site|BDTNP1_TFBS_dl|FBsf0000318738);(TF_binding_site|BDTNP1_TFBS_Med|FBsf0000288574);(TF_binding_site|BDTNP1_TFBS_twi|FBsf0000205864);(TF_binding_site|mE1_TFBS_disco|FBsf0000261510);(TF_binding_site|mE1_TFBS_HSA|FBsf0000382025);(TF_binding_site|mE1_TFBS_sens|FBsf0000220772)
oleoylcholine	53260	X_13023304_SNP	FBgn0030451	CG15717	INTRON	0	C	A	A	0.1	4	36	-1.024	7.68182e-09	(TF_binding_site|BDTNP1_TFBS_da|FBsf0000332518);(TF_binding_site|BDTNP1_TFBS_dl|FBsf0000318738);(TF_binding_site|BDTNP1_TFBS_Med|FBsf0000288574);(TF_binding_site|BDTNP1_TFBS_twi|FBsf0000205864);(TF_binding_site|mE1_TFBS_disco|FBsf0000261510);(TF_binding_site|mE1_TFBS_HSA|FBsf0000382025);(TF_binding_site|mE1_TFBS_sens|FBsf0000220772)
oleoylcholine	53260	X_13023304_SNP	FBgn0030452	MFS10	INTRON	0	C	A	A	0.1	4	36	-1.024	7.68182e-09	(TF_binding_site|BDTNP1_TFBS_da|FBsf0000332518);(TF_binding_site|BDTNP1_TFBS_dl|FBsf0000318738);(TF_binding_site|BDTNP1_TFBS_Med|FBsf0000288574);(TF_binding_site|BDTNP1_TFBS_twi|FBsf0000205864);(TF_binding_site|mE1_TFBS_disco|FBsf0000261510);(TF_binding_site|mE1_TFBS_HSA|FBsf0000382025);(TF_binding_site|mE1_TFBS_sens|FBsf0000220772)
oleoylcholine	53260	X_13023304_SNP	FBgn0052638	CG32638	UPSTREAM	477	C	A	A	0.1	4	36	-1.024	7.68182e-09	(TF_binding_site|BDTNP1_TFBS_da|FBsf0000332518);(TF_binding_site|BDTNP1_TFBS_dl|FBsf0000318738);(TF_binding_site|BDTNP1_TFBS_Med|FBsf0000288574);(TF_binding_site|BDTNP1_TFBS_twi|FBsf0000205864);(TF_binding_site|mE1_TFBS_disco|FBsf0000261510);(TF_binding_site|mE1_TFBS_HSA|FBsf0000382025);(TF_binding_site|mE1_TFBS_sens|FBsf0000220772)
oleoylcholine	53260	X_13023304_SNP	FBgn0065101	snmRNA:204	UPSTREAM	641	C	A	A	0.1	4	36	-1.024	7.68182e-09	(TF_binding_site|BDTNP1_TFBS_da|FBsf0000332518);(TF_binding_site|BDTNP1_TFBS_dl|FBsf0000318738);(TF_binding_site|BDTNP1_TFBS_Med|FBsf0000288574);(TF_binding_site|BDTNP1_TFBS_twi|FBsf0000205864);(TF_binding_site|mE1_TFBS_disco|FBsf0000261510);(TF_binding_site|mE1_TFBS_HSA|FBsf0000382025);(TF_binding_site|mE1_TFBS_sens|FBsf0000220772)
oleoylcholine	53260	X_13023306_SNP	FBgn0030451	CG15717	INTRON	0	C	A	A	0.1	4	36	-1.024	7.68182e-09	(TF_binding_site|BDTNP1_TFBS_da|FBsf0000332518);(TF_binding_site|BDTNP1_TFBS_dl|FBsf0000318738);(TF_binding_site|BDTNP1_TFBS_Med|FBsf0000288574);(TF_binding_site|BDTNP1_TFBS_twi|FBsf0000205864);(TF_binding_site|mE1_TFBS_disco|FBsf0000261510);(TF_binding_site|mE1_TFBS_HSA|FBsf0000382025);(TF_binding_site|mE1_TFBS_sens|FBsf0000220772)
oleoylcholine	53260	X_13023306_SNP	FBgn0030452	MFS10	INTRON	0	C	A	A	0.1	4	36	-1.024	7.68182e-09	(TF_binding_site|BDTNP1_TFBS_da|FBsf0000332518);(TF_binding_site|BDTNP1_TFBS_dl|FBsf0000318738);(TF_binding_site|BDTNP1_TFBS_Med|FBsf0000288574);(TF_binding_site|BDTNP1_TFBS_twi|FBsf0000205864);(TF_binding_site|mE1_TFBS_disco|FBsf0000261510);(TF_binding_site|mE1_TFBS_HSA|FBsf0000382025);(TF_binding_site|mE1_TFBS_sens|FBsf0000220772)
oleoylcholine	53260	X_13023306_SNP	FBgn0052638	CG32638	UPSTREAM	479	C	A	A	0.1	4	36	-1.024	7.68182e-09	(TF_binding_site|BDTNP1_TFBS_da|FBsf0000332518);(TF_binding_site|BDTNP1_TFBS_dl|FBsf0000318738);(TF_binding_site|BDTNP1_TFBS_Med|FBsf0000288574);(TF_binding_site|BDTNP1_TFBS_twi|FBsf0000205864);(TF_binding_site|mE1_TFBS_disco|FBsf0000261510);(TF_binding_site|mE1_TFBS_HSA|FBsf0000382025);(TF_binding_site|mE1_TFBS_sens|FBsf0000220772)
oleoylcholine	53260	X_13023306_SNP	FBgn0065101	snmRNA:204	UPSTREAM	643	C	A	A	0.1	4	36	-1.024	7.68182e-09	(TF_binding_site|BDTNP1_TFBS_da|FBsf0000332518);(TF_binding_site|BDTNP1_TFBS_dl|FBsf0000318738);(TF_binding_site|BDTNP1_TFBS_Med|FBsf0000288574);(TF_binding_site|BDTNP1_TFBS_twi|FBsf0000205864);(TF_binding_site|mE1_TFBS_disco|FBsf0000261510);(TF_binding_site|mE1_TFBS_HSA|FBsf0000382025);(TF_binding_site|mE1_TFBS_sens|FBsf0000220772)
oleoylcholine	53260	X_13023321_SNP	FBgn0030452	MFS10	INTRON	0	C	A	A	0.1	4	36	-1.024	7.68182e-09	(TF_binding_site|BDTNP1_TFBS_da|FBsf0000332518);(TF_binding_site|BDTNP1_TFBS_dl|FBsf0000318738);(TF_binding_site|BDTNP1_TFBS_Med|FBsf0000288574);(TF_binding_site|BDTNP1_TFBS_twi|FBsf0000205864);(TF_binding_site|mE1_TFBS_disco|FBsf0000261510);(TF_binding_site|mE1_TFBS_HSA|FBsf0000382025);(TF_binding_site|mE1_TFBS_sens|FBsf0000220772)
oleoylcholine	53260	X_13023321_SNP	FBgn0030451	CG15717	INTRON	0	C	A	A	0.1	4	36	-1.024	7.68182e-09	(TF_binding_site|BDTNP1_TFBS_da|FBsf0000332518);(TF_binding_site|BDTNP1_TFBS_dl|FBsf0000318738);(TF_binding_site|BDTNP1_TFBS_Med|FBsf0000288574);(TF_binding_site|BDTNP1_TFBS_twi|FBsf0000205864);(TF_binding_site|mE1_TFBS_disco|FBsf0000261510);(TF_binding_site|mE1_TFBS_HSA|FBsf0000382025);(TF_binding_site|mE1_TFBS_sens|FBsf0000220772)
oleoylcholine	53260	X_13023321_SNP	FBgn0052638	CG32638	UPSTREAM	494	C	A	A	0.1	4	36	-1.024	7.68182e-09	(TF_binding_site|BDTNP1_TFBS_da|FBsf0000332518);(TF_binding_site|BDTNP1_TFBS_dl|FBsf0000318738);(TF_binding_site|BDTNP1_TFBS_Med|FBsf0000288574);(TF_binding_site|BDTNP1_TFBS_twi|FBsf0000205864);(TF_binding_site|mE1_TFBS_disco|FBsf0000261510);(TF_binding_site|mE1_TFBS_HSA|FBsf0000382025);(TF_binding_site|mE1_TFBS_sens|FBsf0000220772)
oleoylcholine	53260	X_13023321_SNP	FBgn0065101	snmRNA:204	UPSTREAM	658	C	A	A	0.1	4	36	-1.024	7.68182e-09	(TF_binding_site|BDTNP1_TFBS_da|FBsf0000332518);(TF_binding_site|BDTNP1_TFBS_dl|FBsf0000318738);(TF_binding_site|BDTNP1_TFBS_Med|FBsf0000288574);(TF_binding_site|BDTNP1_TFBS_twi|FBsf0000205864);(TF_binding_site|mE1_TFBS_disco|FBsf0000261510);(TF_binding_site|mE1_TFBS_HSA|FBsf0000382025);(TF_binding_site|mE1_TFBS_sens|FBsf0000220772)
oleoylcholine	53260	2R_4330834_SNP	FBgn0033292	Cyp4ad1	UPSTREAM	523	A	G	G	0.1176	4	30	-1.034	7.72732e-09	-
oleoylcholine	53260	2R_11436672_SNP	FBgn0034030	CG8192	INTRON	0	A	C	C	0.1053	4	34	-1.027	7.72884e-09	(TF_binding_site|BDTNP1_TFBS_z|FBsf0000196608)
oleoylcholine	53260	3R_22178007_SNP	FBgn0053970	CG33970	INTRON	0	T	A	A	0.1053	4	34	-1.027	7.95311e-09	-
oleoylcholine	53260	3L_13740233_SNP	FBgn0264001	bru-3	INTRON	0	G	T	T	0.1143	4	31	-1.031	8.21269e-09	-
oleoylcholine	53260	3L_15143706_SNP	FBgn0036485	FucTA	INTRON	0	G	A	A	0.1026	4	35	-1.024	8.58234e-09	-
oleoylcholine	53260	3R_14596609_SNP	FBgn0038652	CG7720	INTRON	0	T	C	C	0.1026	4	35	-1.024	8.58234e-09	-
oleoylcholine	53260	2R_11866629_SNP	FBgn0265045	Strn-Mlck	SYNONYMOUS_CODING	0	G	T	T	0.1026	4	35	-1.022	9.34026e-09	-
oleoylcholine	53260	3L_18825213_SNP	FBgn0036816	Indy	INTRON	0	T	C	C	0.1026	4	35	-1.022	9.52541e-09	-
oleoylcholine	53260	3L_20455706_SNP	FBgn0036995	CG5195	INTRON	0	A	C	C	0.1026	4	35	-1.021	9.78023e-09	-
oleoylcholine	53260	3L_20455706_SNP	FBgn0036996	mag	DOWNSTREAM	332	A	C	C	0.1026	4	35	-1.021	9.78023e-09	-
oleoylcholine	53260	2L_17349905_SNP	Intergenic	Intergenic	Intergenic		T	C	C	0.1026	4	35	-1.019	1.08151e-08	-
oleoylcholine	53260	3R_22771096_SNP	FBgn0015541	sda	DOWNSTREAM	65	C	T	T	0.1026	4	35	-1.019	1.08151e-08	(TF_binding_site|BDTNP1_TFBS_Med|FBsf0000286669);(TF_binding_site|mE1_TFBS_D|FBsf0000240246);(TF_binding_site|mE1_TFBS_HSA|FBsf0000375562)
oleoylcholine	53260	3R_22771096_SNP	FBgn0039462	CG14252	UPSTREAM	160	C	T	T	0.1026	4	35	-1.019	1.08151e-08	(TF_binding_site|BDTNP1_TFBS_Med|FBsf0000286669);(TF_binding_site|mE1_TFBS_D|FBsf0000240246);(TF_binding_site|mE1_TFBS_HSA|FBsf0000375562)
oleoylcholine	53260	3R_22771112_SNP	FBgn0015541	sda	DOWNSTREAM	81	G	C	C	0.1026	4	35	-1.019	1.08151e-08	(TF_binding_site|BDTNP1_TFBS_Med|FBsf0000286669);(TF_binding_site|mE1_TFBS_D|FBsf0000240246);(TF_binding_site|mE1_TFBS_HSA|FBsf0000375562)
oleoylcholine	53260	3R_22771112_SNP	FBgn0039462	CG14252	UPSTREAM	144	G	C	C	0.1026	4	35	-1.019	1.08151e-08	(TF_binding_site|BDTNP1_TFBS_Med|FBsf0000286669);(TF_binding_site|mE1_TFBS_D|FBsf0000240246);(TF_binding_site|mE1_TFBS_HSA|FBsf0000375562)
oleoylcholine	53260	3R_22771117_SNP	FBgn0015541	sda	DOWNSTREAM	86	C	G	G	0.1026	4	35	-1.019	1.08151e-08	(TF_binding_site|BDTNP1_TFBS_Med|FBsf0000286669);(TF_binding_site|mE1_TFBS_D|FBsf0000240246);(TF_binding_site|mE1_TFBS_HSA|FBsf0000375562)
oleoylcholine	53260	3R_22771117_SNP	FBgn0039462	CG14252	UPSTREAM	139	C	G	G	0.1026	4	35	-1.019	1.08151e-08	(TF_binding_site|BDTNP1_TFBS_Med|FBsf0000286669);(TF_binding_site|mE1_TFBS_D|FBsf0000240246);(TF_binding_site|mE1_TFBS_HSA|FBsf0000375562)
oleoylcholine	53260	2L_16416412_SNP	FBgn0028523	CG5888	INTRON	0	C	T	T	0.1026	4	35	-1.019	1.1082e-08	(TF_binding_site|mE1_TFBS_cad|FBsf0000242234)
oleoylcholine	53260	3R_14729430_DEL	FBgn0085313	CG34284	UPSTREAM	776	C	CAAGTTTGGCC	CAAGTTTGGCC	0.1579	6	32	-0.858	1.15671e-08	(TF_binding_site|mE1_TFBS_HSA|FBsf0000373009)
oleoylcholine	53260	2R_4418489_SNP	FBgn0050361	mtt	INTRON	0	G	C	C	0.1026	4	35	-1.018	1.18161e-08	-
oleoylcholine	53260	3R_14383416_SNP	Intergenic	Intergenic	Intergenic		A	T	T	0.1026	4	35	-1.018	1.18161e-08	-
oleoylcholine	53260	3L_10208897_SNP	FBgn0036075	CG8065	NON_SYNONYMOUS_CODING	0	A	C	C	0.1282	5	34	-0.9591	1.18666e-08	-
oleoylcholine	53260	3L_10208899_SNP	FBgn0036075	CG8065	NON_SYNONYMOUS_CODING	0	G	A	A	0.1282	5	34	-0.9591	1.18666e-08	-
oleoylcholine	53260	3R_23951223_SNP	Intergenic	Intergenic	Intergenic		T	C	C	0.1026	4	35	-1.017	1.19833e-08	-
oleoylcholine	53260	3L_13732352_SNP	FBgn0264001	bru-3	INTRON	0	T	C	C	0.1053	4	34	-1.017	1.30354e-08	-
oleoylcholine	53260	2R_11864798_SNP	FBgn0265045	Strn-Mlck	NON_SYNONYMOUS_CODING	0	C	T	T	0.1081	4	33	-1.019	1.32864e-08	-
oleoylcholine	53260	3R_22771125_SNP	FBgn0015541	sda	DOWNSTREAM	94	A	G	G	0.1053	4	34	-1.017	1.35005e-08	(TF_binding_site|BDTNP1_TFBS_Med|FBsf0000286669);(TF_binding_site|mE1_TFBS_D|FBsf0000240246);(TF_binding_site|mE1_TFBS_HSA|FBsf0000375562)
oleoylcholine	53260	3R_22771125_SNP	FBgn0039462	CG14252	UPSTREAM	131	A	G	G	0.1053	4	34	-1.017	1.35005e-08	(TF_binding_site|BDTNP1_TFBS_Med|FBsf0000286669);(TF_binding_site|mE1_TFBS_D|FBsf0000240246);(TF_binding_site|mE1_TFBS_HSA|FBsf0000375562)
oleoylcholine	53260	3L_12881778_SNP	FBgn0036321	CG14120	SYNONYMOUS_CODING	0	T	G	G	0.175	7	33	-0.7998	1.395e-08	-
oleoylcholine	53260	3L_12881778_SNP	FBgn0267312	CR45748	DOWNSTREAM	674	T	G	G	0.175	7	33	-0.7998	1.395e-08	-
oleoylcholine	53260	2L_15100050_SNP	Intergenic	Intergenic	Intergenic		T	A	A	0.1026	4	35	-1.014	1.40529e-08	(TF_binding_site|mE1_TFBS_HSA|FBsf0000351298);(TF_binding_site|mE1_TFBS_sens|FBsf0000217761)
oleoylcholine	53260	2R_5035269_SNP	FBgn0050344	CG30344	SYNONYMOUS_CODING	0	T	A	A	0.1026	4	35	-1.014	1.45384e-08	-
oleoylcholine	53260	2R_5035269_SNP	FBgn0050345	CG30345	UPSTREAM	925	T	A	A	0.1026	4	35	-1.014	1.45384e-08	-
oleoylcholine	53260	2L_9883171_SNP	FBgn0032151	nAChRalpha6	INTRON	0	T	C	C	0.1053	4	34	-1.014	1.53754e-08	-
oleoylcholine	53260	3R_5433972_SNP	FBgn0037720	CG8312	INTRON	0	G	T	G	0.125	5	35	-0.951	1.63369e-08	(TF_binding_site|BDTNP1_TFBS_hb|FBsf0000292355)
oleoylcholine	53260	2R_15411935_DEL	FBgn0003435	sm	UTR_3_PRIME	0	A	AA	AA	0.1081	4	33	-1.01	2.02221e-08	-
oleoylcholine	53260	2R_9035756_SNP	FBgn0263998	Ack-like	INTRON	0	C	G	G	0.15	6	34	-0.8432	2.25955e-08	(TF_binding_site|mE1_TFBS_cad|FBsf0000246521)
oleoylcholine	53260	3R_26750156_SNP	FBgn0020912	Ptx1	SYNONYMOUS_CODING	0	C	G	G	0.1538	6	33	-0.8443	2.3684e-08	-
oleoylcholine	53260	2L_15238598_SNP	FBgn0028516	ZnT35C	INTRON	0	A	C	C	0.1538	6	33	-0.8407	2.93241e-08	-
oleoylcholine	53260	3R_20385399_SNP	FBgn0039209	CG13624	DOWNSTREAM	112	T	A	A	0.1351	5	32	-0.9479	2.95448e-08	-
orotate	1505	3R_12674741_SNP	FBgn0264857	iab-8	INTRON	0	C	A	A	0.1111	4	32	-0.5246	5.38031e-09	(TF_binding_site|BDTNP1_TFBS_da|FBsf0000329588);(TF_binding_site|BDTNP1_TFBS_dl|FBsf0000312277);(TF_binding_site|BDTNP1_TFBS_ftz|FBsf0000295486);(TF_binding_site|BDTNP1_TFBS_gt|FBsf0000294474);(TF_binding_site|BDTNP1_TFBS_hb|FBsf0000292569);(TF_binding_site|BDTNP1_TFBS_Med|FBsf0000285658);(TF_binding_site|BDTNP1_TFBS_prd|FBsf0000276629);(TF_binding_site|BDTNP1_TFBS_twi|FBsf0000265253);(TF_binding…
orotate	1505	3R_12674741_SNP	FBgn0020546	iab-4	UPSTREAM	985	C	A	A	0.1111	4	32	-0.5246	5.38031e-09	(TF_binding_site|BDTNP1_TFBS_da|FBsf0000329588);(TF_binding_site|BDTNP1_TFBS_dl|FBsf0000312277);(TF_binding_site|BDTNP1_TFBS_ftz|FBsf0000295486);(TF_binding_site|BDTNP1_TFBS_gt|FBsf0000294474);(TF_binding_site|BDTNP1_TFBS_hb|FBsf0000292569);(TF_binding_site|BDTNP1_TFBS_Med|FBsf0000285658);(TF_binding_site|BDTNP1_TFBS_prd|FBsf0000276629);(TF_binding_site|BDTNP1_TFBS_twi|FBsf0000265253);(TF_binding…
orotate	1505	3L_8624726_SNP	FBgn0035918	Cdc6	UTR_3_PRIME	0	G	A	G	0.1	4	36	-0.5057	2.10018e-08	-
orotate	1505	3L_8624726_SNP	FBgn0035917	Zasp66	INTRON	0	G	A	G	0.1	4	36	-0.5057	2.10018e-08	-
orotate	1505	2R_13659083_SNP	FBgn0028740	CG6362	SYNONYMOUS_CODING	0	A	G	G	0.1026	4	35	-0.5038	2.8841e-08	(TF_binding_site|mE1_TFBS_cad|FBsf0000246900);(TF_binding_site|mE1_TFBS_chinmo|FBsf0000211494);(TF_binding_site|mE1_TFBS_HSA|FBsf0000357868)
orotate	1505	3L_14509723_SNP	FBgn0087007	bbg	INTRON	0	C	G	G	0.1	4	36	-0.5041	2.8878e-08	-
O-sulfo-L-tyrosine	45413	2R_13624486_SNP	FBgn0034269	CG6406	SYNONYMOUS_CODING	0	G	A	G	0.3077	12	27	-0.3772	1.39583e-08	(TF_binding_site|BDTNP1_TFBS_dl|FBsf0000302857);(TF_binding_site|mE1_TFBS_cad|FBsf0000246894);(TF_binding_site|mE1_TFBS_chinmo|FBsf0000211492);(TF_binding_site|mE1_TFBS_sens|FBsf0000228638)
O-sulfo-L-tyrosine	45413	2R_13624486_SNP	FBgn0034270	CG6401	DOWNSTREAM	641	G	A	G	0.3077	12	27	-0.3772	1.39583e-08	(TF_binding_site|BDTNP1_TFBS_dl|FBsf0000302857);(TF_binding_site|mE1_TFBS_cad|FBsf0000246894);(TF_binding_site|mE1_TFBS_chinmo|FBsf0000211492);(TF_binding_site|mE1_TFBS_sens|FBsf0000228638)
palmitoleoylcarnitine*	53223	3L_7068067_SNP	FBgn0054030	CG34030	NON_SYNONYMOUS_CODING	0	T	G	G	0.125	5	35	-2.071	3.44435e-09	-
palmitoleoylcarnitine*	53223	3L_7068067_SNP	FBgn0035733	CG8641	INTRON	0	T	G	G	0.125	5	35	-2.071	3.44435e-09	-
palmitoleoylcarnitine*	53223	2L_16717556_SNP	FBgn0086907	Cyt-c-d	INTRON	0	T	A	A	0.1429	5	30	-2.089	3.57262e-09	-
palmitoleoylcarnitine*	53223	2L_300747_SNP	FBgn0020622	Pi3K21B	INTRON	0	C	G	G	0.1026	4	35	-2.3	3.99018e-09	-
palmitoleoylcarnitine*	53223	3L_4107654_SNP	FBgn0267230	CR45670	UPSTREAM	184	A	C	C	0.1389	5	31	-2.068	5.8348e-09	(TF_binding_site|BDTNP1_TFBS_dl|FBsf0000305523)
palmitoleoylcarnitine*	53223	3L_4107654_SNP	FBgn0028484	Ack	UPSTREAM	532	A	C	C	0.1389	5	31	-2.068	5.8348e-09	(TF_binding_site|BDTNP1_TFBS_dl|FBsf0000305523)
palmitoleoylcarnitine*	53223	3L_4107654_SNP	FBgn0035498	Fit1	DOWNSTREAM	538	A	C	C	0.1389	5	31	-2.068	5.8348e-09	(TF_binding_site|BDTNP1_TFBS_dl|FBsf0000305523)
palmitoleoylcarnitine*	53223	3R_9283189_SNP	FBgn0038156	CG14372	SYNONYMOUS_CODING	0	A	G	G	0.1081	4	33	-2.285	6.83641e-09	-
palmitoleoylcarnitine*	53223	3R_9283189_SNP	FBgn0040554	CR17025	INTRON	0	A	G	G	0.1081	4	33	-2.285	6.83641e-09	-
palmitoleoylcarnitine*	53223	2L_10054492_SNP	FBgn0053302	Cpr31A	INTRON	0	T	A	A	0.1351	5	32	-2.059	6.98133e-09	(TF_binding_site|mE1_TFBS_jumu|FBsf0000254105)
palmitoleoylcarnitine*	53223	2L_10054492_SNP	FBgn0266169	CR44875	DOWNSTREAM	392	T	A	A	0.1351	5	32	-2.059	6.98133e-09	(TF_binding_site|mE1_TFBS_jumu|FBsf0000254105)
palmitoloelycholine	53257	2R_16331666_SNP	FBgn0086604	CG12484	INTRON	0	C	T	T	0.1111	4	32	-0.8607	1.3304e-10	(TF_binding_site|mE1_TFBS_HSA|FBsf0000358709);(TF_binding_site|mE1_TFBS_inv|FBsf0000236786)
palmitoloelycholine	53257	X_13254696_SNP	FBgn0261085	Syt12	INTRON	0	G	A	A	0.1081	4	33	-0.8446	4.7191e-10	-
palmitoloelycholine	53257	2R_11857426_SNP	FBgn0265045	Strn-Mlck	NON_SYNONYMOUS_CODING	0	A	G	A	0.1026	4	35	-0.8414	4.9506e-10	(TF_binding_site|mE1_TFBS_HSA|FBsf0000357259);(TF_binding_site|mE1_TFBS_sens|FBsf0000228293)
palmitoloelycholine	53257	3L_13645465_SNP	FBgn0264001	bru-3	INTRON	0	T	G	G	0.1026	4	35	-0.8403	5.4346e-10	-
palmitoloelycholine	53257	2L_18766369_SNP	FBgn0045852	ham	INTRON	0	C	T	T	0.1026	4	35	-0.8383	6.401e-10	-
palmitoloelycholine	53257	3R_13719033_SNP	FBgn0053547	Rim	INTRON	0	T	C	C	0.1026	4	35	-0.8383	6.401e-10	-
palmitoloelycholine	53257	3R_22771198_SNP	FBgn0039462	CG14252	UPSTREAM	58	G	A	A	0.1143	4	31	-0.8435	6.5543e-10	(TF_binding_site|BDTNP1_TFBS_Med|FBsf0000286669);(TF_binding_site|mE1_TFBS_D|FBsf0000240246);(TF_binding_site|mE1_TFBS_HSA|FBsf0000375562)
palmitoloelycholine	53257	3R_22771198_SNP	FBgn0015541	sda	DOWNSTREAM	167	G	A	A	0.1143	4	31	-0.8435	6.5543e-10	(TF_binding_site|BDTNP1_TFBS_Med|FBsf0000286669);(TF_binding_site|mE1_TFBS_D|FBsf0000240246);(TF_binding_site|mE1_TFBS_HSA|FBsf0000375562)
palmitoloelycholine	53257	3R_11574083_SNP	Intergenic	Intergenic	Intergenic		A	T	T	0.1026	4	35	-0.8379	6.612e-10	-
palmitoloelycholine	53257	3R_22178007_SNP	FBgn0053970	CG33970	INTRON	0	T	A	A	0.1053	4	34	-0.8389	6.7308e-10	-
palmitoloelycholine	53257	3L_18825213_SNP	FBgn0036816	Indy	INTRON	0	T	C	C	0.1026	4	35	-0.8377	6.7443e-10	-
palmitoloelycholine	53257	2R_13957725_SNP	FBgn0085415	CG34386	INTRON	0	A	G	G	0.1081	4	33	-0.84	6.8974e-10	-
palmitoloelycholine	53257	2R_11436672_SNP	FBgn0034030	CG8192	INTRON	0	A	C	C	0.1053	4	34	-0.8384	7.0491e-10	(TF_binding_site|BDTNP1_TFBS_z|FBsf0000196608)
palmitoloelycholine	53257	2R_8900017_SNP	Intergenic	Intergenic	Intergenic		T	A	A	0.1026	4	35	-0.8357	7.8923e-10	-
palmitoloelycholine	53257	2R_8900023_SNP	Intergenic	Intergenic	Intergenic		T	C	C	0.1026	4	35	-0.8357	7.8923e-10	-
palmitoloelycholine	53257	3L_15143706_SNP	FBgn0036485	FucTA	INTRON	0	G	A	A	0.1026	4	35	-0.8349	8.4059e-10	-
palmitoloelycholine	53257	3R_14596609_SNP	FBgn0038652	CG7720	INTRON	0	T	C	C	0.1026	4	35	-0.8349	8.4059e-10	-
palmitoloelycholine	53257	2L_15100050_SNP	Intergenic	Intergenic	Intergenic		T	A	A	0.1026	4	35	-0.8347	8.5511e-10	(TF_binding_site|mE1_TFBS_HSA|FBsf0000351298);(TF_binding_site|mE1_TFBS_sens|FBsf0000217761)
palmitoloelycholine	53257	X_13254803_SNP	FBgn0261085	Syt12	INTRON	0	G	A	A	0.1081	4	33	-0.8373	8.5669e-10	-
palmitoloelycholine	53257	X_13254810_INS	FBgn0261085	Syt12	INTRON	0	GTT	G	G	0.1081	4	33	-0.8373	8.5669e-10	-
palmitoloelycholine	53257	2L_14993247_SNP	FBgn0086711	mol	INTRON	0	A	G	G	0.1	4	36	-0.8335	8.5912e-10	-
palmitoloelycholine	53257	2L_16165086_SNP	FBgn0001991	Ca-alpha1D	UPSTREAM	745	C	A	A	0.1	4	36	-0.8335	8.5912e-10	-
palmitoloelycholine	53257	2L_16417405_SNP	FBgn0028523	CG5888	INTRON	0	A	G	G	0.1	4	36	-0.8335	8.5912e-10	(TF_binding_site|mE1_TFBS_HSA|FBsf0000351615);(TF_binding_site|mE1_TFBS_inv|FBsf0000234984)
palmitoloelycholine	53257	2L_16417405_SNP	FBgn0086037	snoRNA:Me28S-A2958	DOWNSTREAM	345	A	G	G	0.1	4	36	-0.8335	8.5912e-10	(TF_binding_site|mE1_TFBS_HSA|FBsf0000351615);(TF_binding_site|mE1_TFBS_inv|FBsf0000234984)
palmitoloelycholine	53257	2L_16417406_SNP	FBgn0028523	CG5888	INTRON	0	A	C	C	0.1	4	36	-0.8335	8.5912e-10	(TF_binding_site|mE1_TFBS_HSA|FBsf0000351615);(TF_binding_site|mE1_TFBS_inv|FBsf0000234984)
palmitoloelycholine	53257	2L_16417406_SNP	FBgn0086037	snoRNA:Me28S-A2958	DOWNSTREAM	344	A	C	C	0.1	4	36	-0.8335	8.5912e-10	(TF_binding_site|mE1_TFBS_HSA|FBsf0000351615);(TF_binding_site|mE1_TFBS_inv|FBsf0000234984)
palmitoloelycholine	53257	2L_16436635_SNP	FBgn0028523	CG5888	INTRON	0	G	T	T	0.1	4	36	-0.8335	8.5912e-10	-
palmitoloelycholine	53257	2L_18766000_DEL	FBgn0045852	ham	INTRON	0	T	TTTT	TTTT	0.1	4	36	-0.8335	8.5912e-10	(TF_binding_site|BDTNP1_TFBS_sna|FBsf0000268811);(TF_binding_site|mE1_TFBS_HSA|FBsf0000352234)
palmitoloelycholine	53257	2L_18766005_INS	FBgn0045852	ham	INTRON	0	AAACTAAC	A	A	0.1	4	36	-0.8335	8.5912e-10	(TF_binding_site|BDTNP1_TFBS_sna|FBsf0000268811);(TF_binding_site|mE1_TFBS_HSA|FBsf0000352234)
palmitoloelycholine	53257	2L_18766221_SNP	FBgn0045852	ham	INTRON	0	A	G	G	0.1	4	36	-0.8335	8.5912e-10	-
palmitoloelycholine	53257	2L_9873493_SNP	FBgn0032151	nAChRalpha6	INTRON	0	T	C	C	0.1	4	36	-0.8335	8.5912e-10	-
palmitoloelycholine	53257	2R_10095334_SNP	FBgn0005613	Sox15	INTRON	0	T	C	C	0.1	4	36	-0.8335	8.5912e-10	(regulatory_region|REDfly_CRMs|FBsf0000435238);(regulatory_region|REDfly_CRMs|FBsf0000436289);(silencer|mE1_HDAC_PRE|FBsf0000343458);(TF_binding_site|BDTNP1_TFBS_da|FBsf0000324202);(TF_binding_site|BDTNP1_TFBS_dl|FBsf0000302071);(TF_binding_site|BDTNP1_TFBS_Med|FBsf0000280303);(TF_binding_site|BDTNP1_TFBS_prd|FBsf0000274418);(TF_binding_site|BDTNP1_TFBS_twi|FBsf0000199339);(TF_binding_site|mE1_TF…
palmitoloelycholine	53257	2R_11838039_SNP	FBgn0265045	Strn-Mlck	INTRON	0	G	C	C	0.1	4	36	-0.8335	8.5912e-10	(TF_binding_site|mE1_TFBS_HSA|FBsf0000357251)
palmitoloelycholine	53257	2R_11866143_SNP	FBgn0265045	Strn-Mlck	SYNONYMOUS_CODING	0	T	C	C	0.1	4	36	-0.8335	8.5912e-10	-
palmitoloelycholine	53257	2R_11868288_SNP	FBgn0265045	Strn-Mlck	SYNONYMOUS_CODING	0	T	C	C	0.1	4	36	-0.8335	8.5912e-10	-
palmitoloelycholine	53257	2R_11870336_SNP	FBgn0265045	Strn-Mlck	NON_SYNONYMOUS_CODING	0	T	C	C	0.1	4	36	-0.8335	8.5912e-10	-
palmitoloelycholine	53257	2R_12553684_SNP	FBgn0024315	Picot	INTRON	0	T	G	T	0.1	4	36	-0.8335	8.5912e-10	(TF_binding_site|mE1_TFBS_cad|FBsf0000246826);(TF_binding_site|mE1_TFBS_HSA|FBsf0000357513)
palmitoloelycholine	53257	2R_1876885_SNP	FBgn0264959	Src42A	INTRON	0	C	T	T	0.1	4	36	-0.8335	8.5912e-10	-
palmitoloelycholine	53257	2R_1949882_SNP	FBgn0033058	CCHa2-R	INTRON	0	T	C	C	0.1	4	36	-0.8335	8.5912e-10	-
palmitoloelycholine	53257	2R_1950313_SNP	FBgn0033058	CCHa2-R	UTR_5_PRIME	0	A	G	G	0.1	4	36	-0.8335	8.5912e-10	-
palmitoloelycholine	53257	2R_2817972_SNP	FBgn0053558	mim	INTRON	0	A	T	T	0.1	4	36	-0.8335	8.5912e-10	(TF_binding_site|mE1_TFBS_cad|FBsf0000245929);(TF_binding_site|mE1_TFBS_HSA|FBsf0000353966)
palmitoloelycholine	53257	2R_3440311_SNP	FBgn0033192	Corin	INTRON	0	T	G	G	0.1	4	36	-0.8335	8.5912e-10	-
palmitoloelycholine	53257	2R_3440326_SNP	FBgn0033192	Corin	INTRON	0	A	C	C	0.1	4	36	-0.8335	8.5912e-10	-
palmitoloelycholine	53257	2R_3597116_SNP	FBgn0033214	CG1941	UPSTREAM	262	C	G	C	0.1	4	36	-0.8335	8.5912e-10	(TF_binding_site|mE1_TFBS_HSA|FBsf0000354279);(TF_binding_site|mE1_TFBS_sens|FBsf0000226692)
palmitoloelycholine	53257	2R_3597116_SNP	FBgn0003733	tor	UPSTREAM	427	C	G	C	0.1	4	36	-0.8335	8.5912e-10	(TF_binding_site|mE1_TFBS_HSA|FBsf0000354279);(TF_binding_site|mE1_TFBS_sens|FBsf0000226692)
palmitoloelycholine	53257	2R_4103119_SNP	FBgn0053087	LRP1	INTRON	0	G	A	A	0.1	4	36	-0.8335	8.5912e-10	-
palmitoloelycholine	53257	2R_4105298_SNP	FBgn0053087	LRP1	SYNONYMOUS_CODING	0	C	T	T	0.1	4	36	-0.8335	8.5912e-10	(TF_binding_site|mE1_TFBS_cad|FBsf0000246058);(TF_binding_site|mE1_TFBS_HSA|FBsf0000354472);(TF_binding_site|mE1_TFBS_sens|FBsf0000226813)
palmitoloelycholine	53257	2R_4114354_SNP	FBgn0053087	LRP1	DOWNSTREAM	411	T	C	C	0.1	4	36	-0.8335	8.5912e-10	(TF_binding_site|BDTNP1_TFBS_da|FBsf0000323476);(TF_binding_site|BDTNP1_TFBS_dl|FBsf0000300630);(TF_binding_site|BDTNP1_TFBS_gt|FBsf0000293386);(TF_binding_site|BDTNP1_TFBS_Med|FBsf0000279541);(TF_binding_site|BDTNP1_TFBS_sna|FBsf0000267517);(TF_binding_site|BDTNP1_TFBS_twi|FBsf0000198728);(TF_binding_site|mE1_TFBS_disco|FBsf0000259569);(TF_binding_site|mE1_TFBS_HSA|FBsf0000354476);(TF_binding_si…
palmitoloelycholine	53257	2R_4118574_SNP	FBgn0010109	dpn	INTRON	0	T	C	C	0.1	4	36	-0.8335	8.5912e-10	(TF_binding_site|BDTNP1_TFBS_Med|FBsf0000279543);(TF_binding_site|BDTNP1_TFBS_z|FBsf0000196404);(TF_binding_site|mE1_TFBS_cad|FBsf0000246059);(TF_binding_site|mE1_TFBS_HSA|FBsf0000354477);(TF_binding_site|mE1_TFBS_HSA|FBsf0000354478);(TF_binding_site|mE1_TFBS_sens|FBsf0000226817)
palmitoloelycholine	53257	2R_4118574_SNP	FBgn0265302	CR44275	DOWNSTREAM	273	T	C	C	0.1	4	36	-0.8335	8.5912e-10	(TF_binding_site|BDTNP1_TFBS_Med|FBsf0000279543);(TF_binding_site|BDTNP1_TFBS_z|FBsf0000196404);(TF_binding_site|mE1_TFBS_cad|FBsf0000246059);(TF_binding_site|mE1_TFBS_HSA|FBsf0000354477);(TF_binding_site|mE1_TFBS_HSA|FBsf0000354478);(TF_binding_site|mE1_TFBS_sens|FBsf0000226817)
palmitoloelycholine	53257	2R_4125488_SNP	FBgn0013726	pnut	UTR_5_PRIME	0	G	A	A	0.1	4	36	-0.8335	8.5912e-10	(TF_binding_site|BDTNP1_TFBS_da|FBsf0000323483);(TF_binding_site|BDTNP1_TFBS_dl|FBsf0000300639);(TF_binding_site|BDTNP1_TFBS_Med|FBsf0000279548);(TF_binding_site|BDTNP1_TFBS_prd|FBsf0000274261);(TF_binding_site|BDTNP1_TFBS_tll|FBsf0000266784);(TF_binding_site|BDTNP1_TFBS_twi|FBsf0000198729);(TF_binding_site|BDTNP1_TFBS_z|FBsf0000196409);(TF_binding_site|mE1_TFBS_cad|FBsf0000246061);(TF_binding_si…
palmitoloelycholine	53257	2R_4346922_SNP	FBgn0033294	Mal-A4	SYNONYMOUS_CODING	0	A	C	C	0.1	4	36	-0.8335	8.5912e-10	(TF_binding_site|mE1_TFBS_HSA|FBsf0000354555);(TF_binding_site|mE1_TFBS_inv|FBsf0000236387)
palmitoloelycholine	53257	2R_4355379_SNP	FBgn0050360	Mal-A6	DOWNSTREAM	279	A	C	C	0.1	4	36	-0.8335	8.5912e-10	-
palmitoloelycholine	53257	2R_4355379_SNP	FBgn0033296	Mal-A7	DOWNSTREAM	772	A	C	C	0.1	4	36	-0.8335	8.5912e-10	-
palmitoloelycholine	53257	2R_791023_SNP	FBgn0264911	CG44102	INTRON	0	A	T	T	0.1	4	36	-0.8335	8.5912e-10	(transposable_element|FlyBase|FBti0060923);(transposable_element|FlyBase|FBti0064077)
palmitoloelycholine	53257	2R_9035836_SNP	FBgn0263998	Ack-like	INTRON	0	G	C	C	0.1	4	36	-0.8335	8.5912e-10	(TF_binding_site|mE1_TFBS_cad|FBsf0000246521)
palmitoloelycholine	53257	2R_9036076_DEL	FBgn0263998	Ack-like	INTRON	0	T	TA	TA	0.1	4	36	-0.8335	8.5912e-10	-
palmitoloelycholine	53257	2R_9036529_SNP	FBgn0263998	Ack-like	SYNONYMOUS_CODING	0	T	C	C	0.1	4	36	-0.8335	8.5912e-10	-
palmitoloelycholine	53257	3L_10428474_SNP	Intergenic	Intergenic	Intergenic		T	G	G	0.1	4	36	-0.8335	8.5912e-10	(TF_binding_site|mE1_TFBS_eve|FBsf0000252643);(TF_binding_site|mE1_TFBS_HSA|FBsf0000363917)
palmitoloelycholine	53257	3L_13200044_SNP	Intergenic	Intergenic	Intergenic		A	G	G	0.1	4	36	-0.8335	8.5912e-10	-
palmitoloelycholine	53257	3L_13200045_SNP	Intergenic	Intergenic	Intergenic		A	C	C	0.1	4	36	-0.8335	8.5912e-10	-
palmitoloelycholine	53257	3L_13254092_SNP	FBgn0023095	caps	INTRON	0	T	C	C	0.1	4	36	-0.8335	8.5912e-10	-
palmitoloelycholine	53257	3R_15638161_SNP	FBgn0014135	bnl	INTRON	0	T	A	A	0.1	4	36	-0.8335	8.5912e-10	-
palmitoloelycholine	53257	3R_22769916_SNP	FBgn0015541	sda	NON_SYNONYMOUS_CODING	0	T	C	T	0.1	4	36	-0.8335	8.5912e-10	-
palmitoloelycholine	53257	3R_22771432_SNP	FBgn0039462	CG14252	INTRON	0	G	T	T	0.1	4	36	-0.8335	8.5912e-10	(TF_binding_site|BDTNP1_TFBS_Med|FBsf0000286669);(TF_binding_site|mE1_TFBS_D|FBsf0000240246);(TF_binding_site|mE1_TFBS_HSA|FBsf0000375562)
palmitoloelycholine	53257	3R_22771432_SNP	FBgn0015541	sda	DOWNSTREAM	401	G	T	T	0.1	4	36	-0.8335	8.5912e-10	(TF_binding_site|BDTNP1_TFBS_Med|FBsf0000286669);(TF_binding_site|mE1_TFBS_D|FBsf0000240246);(TF_binding_site|mE1_TFBS_HSA|FBsf0000375562)
palmitoloelycholine	53257	X_13023299_SNP	FBgn0030451	CG15717	INTRON	0	G	T	T	0.1	4	36	-0.8335	8.5912e-10	(TF_binding_site|BDTNP1_TFBS_da|FBsf0000332518);(TF_binding_site|BDTNP1_TFBS_dl|FBsf0000318738);(TF_binding_site|BDTNP1_TFBS_Med|FBsf0000288574);(TF_binding_site|BDTNP1_TFBS_twi|FBsf0000205864);(TF_binding_site|mE1_TFBS_disco|FBsf0000261510);(TF_binding_site|mE1_TFBS_HSA|FBsf0000382025);(TF_binding_site|mE1_TFBS_sens|FBsf0000220772)
palmitoloelycholine	53257	X_13023299_SNP	FBgn0030452	MFS10	INTRON	0	G	T	T	0.1	4	36	-0.8335	8.5912e-10	(TF_binding_site|BDTNP1_TFBS_da|FBsf0000332518);(TF_binding_site|BDTNP1_TFBS_dl|FBsf0000318738);(TF_binding_site|BDTNP1_TFBS_Med|FBsf0000288574);(TF_binding_site|BDTNP1_TFBS_twi|FBsf0000205864);(TF_binding_site|mE1_TFBS_disco|FBsf0000261510);(TF_binding_site|mE1_TFBS_HSA|FBsf0000382025);(TF_binding_site|mE1_TFBS_sens|FBsf0000220772)
palmitoloelycholine	53257	X_13023299_SNP	FBgn0052638	CG32638	UPSTREAM	472	G	T	T	0.1	4	36	-0.8335	8.5912e-10	(TF_binding_site|BDTNP1_TFBS_da|FBsf0000332518);(TF_binding_site|BDTNP1_TFBS_dl|FBsf0000318738);(TF_binding_site|BDTNP1_TFBS_Med|FBsf0000288574);(TF_binding_site|BDTNP1_TFBS_twi|FBsf0000205864);(TF_binding_site|mE1_TFBS_disco|FBsf0000261510);(TF_binding_site|mE1_TFBS_HSA|FBsf0000382025);(TF_binding_site|mE1_TFBS_sens|FBsf0000220772)
palmitoloelycholine	53257	X_13023299_SNP	FBgn0065101	snmRNA:204	UPSTREAM	636	G	T	T	0.1	4	36	-0.8335	8.5912e-10	(TF_binding_site|BDTNP1_TFBS_da|FBsf0000332518);(TF_binding_site|BDTNP1_TFBS_dl|FBsf0000318738);(TF_binding_site|BDTNP1_TFBS_Med|FBsf0000288574);(TF_binding_site|BDTNP1_TFBS_twi|FBsf0000205864);(TF_binding_site|mE1_TFBS_disco|FBsf0000261510);(TF_binding_site|mE1_TFBS_HSA|FBsf0000382025);(TF_binding_site|mE1_TFBS_sens|FBsf0000220772)
palmitoloelycholine	53257	X_13023301_DEL	FBgn0030452	MFS10	INTRON	0	T	CA	CA	0.1	4	36	-0.8335	8.5912e-10	(TF_binding_site|BDTNP1_TFBS_da|FBsf0000332518);(TF_binding_site|BDTNP1_TFBS_dl|FBsf0000318738);(TF_binding_site|BDTNP1_TFBS_Med|FBsf0000288574);(TF_binding_site|BDTNP1_TFBS_twi|FBsf0000205864);(TF_binding_site|mE1_TFBS_disco|FBsf0000261510);(TF_binding_site|mE1_TFBS_HSA|FBsf0000382025);(TF_binding_site|mE1_TFBS_sens|FBsf0000220772)
palmitoloelycholine	53257	X_13023301_DEL	FBgn0030451	CG15717	INTRON	0	T	CA	CA	0.1	4	36	-0.8335	8.5912e-10	(TF_binding_site|BDTNP1_TFBS_da|FBsf0000332518);(TF_binding_site|BDTNP1_TFBS_dl|FBsf0000318738);(TF_binding_site|BDTNP1_TFBS_Med|FBsf0000288574);(TF_binding_site|BDTNP1_TFBS_twi|FBsf0000205864);(TF_binding_site|mE1_TFBS_disco|FBsf0000261510);(TF_binding_site|mE1_TFBS_HSA|FBsf0000382025);(TF_binding_site|mE1_TFBS_sens|FBsf0000220772)
palmitoloelycholine	53257	X_13023301_DEL	FBgn0052638	CG32638	UPSTREAM	474	T	CA	CA	0.1	4	36	-0.8335	8.5912e-10	(TF_binding_site|BDTNP1_TFBS_da|FBsf0000332518);(TF_binding_site|BDTNP1_TFBS_dl|FBsf0000318738);(TF_binding_site|BDTNP1_TFBS_Med|FBsf0000288574);(TF_binding_site|BDTNP1_TFBS_twi|FBsf0000205864);(TF_binding_site|mE1_TFBS_disco|FBsf0000261510);(TF_binding_site|mE1_TFBS_HSA|FBsf0000382025);(TF_binding_site|mE1_TFBS_sens|FBsf0000220772)
palmitoloelycholine	53257	X_13023301_DEL	FBgn0065101	snmRNA:204	UPSTREAM	638	T	CA	CA	0.1	4	36	-0.8335	8.5912e-10	(TF_binding_site|BDTNP1_TFBS_da|FBsf0000332518);(TF_binding_site|BDTNP1_TFBS_dl|FBsf0000318738);(TF_binding_site|BDTNP1_TFBS_Med|FBsf0000288574);(TF_binding_site|BDTNP1_TFBS_twi|FBsf0000205864);(TF_binding_site|mE1_TFBS_disco|FBsf0000261510);(TF_binding_site|mE1_TFBS_HSA|FBsf0000382025);(TF_binding_site|mE1_TFBS_sens|FBsf0000220772)
palmitoloelycholine	53257	X_13023304_SNP	FBgn0030451	CG15717	INTRON	0	C	A	A	0.1	4	36	-0.8335	8.5912e-10	(TF_binding_site|BDTNP1_TFBS_da|FBsf0000332518);(TF_binding_site|BDTNP1_TFBS_dl|FBsf0000318738);(TF_binding_site|BDTNP1_TFBS_Med|FBsf0000288574);(TF_binding_site|BDTNP1_TFBS_twi|FBsf0000205864);(TF_binding_site|mE1_TFBS_disco|FBsf0000261510);(TF_binding_site|mE1_TFBS_HSA|FBsf0000382025);(TF_binding_site|mE1_TFBS_sens|FBsf0000220772)
palmitoloelycholine	53257	X_13023304_SNP	FBgn0030452	MFS10	INTRON	0	C	A	A	0.1	4	36	-0.8335	8.5912e-10	(TF_binding_site|BDTNP1_TFBS_da|FBsf0000332518);(TF_binding_site|BDTNP1_TFBS_dl|FBsf0000318738);(TF_binding_site|BDTNP1_TFBS_Med|FBsf0000288574);(TF_binding_site|BDTNP1_TFBS_twi|FBsf0000205864);(TF_binding_site|mE1_TFBS_disco|FBsf0000261510);(TF_binding_site|mE1_TFBS_HSA|FBsf0000382025);(TF_binding_site|mE1_TFBS_sens|FBsf0000220772)
palmitoloelycholine	53257	X_13023304_SNP	FBgn0052638	CG32638	UPSTREAM	477	C	A	A	0.1	4	36	-0.8335	8.5912e-10	(TF_binding_site|BDTNP1_TFBS_da|FBsf0000332518);(TF_binding_site|BDTNP1_TFBS_dl|FBsf0000318738);(TF_binding_site|BDTNP1_TFBS_Med|FBsf0000288574);(TF_binding_site|BDTNP1_TFBS_twi|FBsf0000205864);(TF_binding_site|mE1_TFBS_disco|FBsf0000261510);(TF_binding_site|mE1_TFBS_HSA|FBsf0000382025);(TF_binding_site|mE1_TFBS_sens|FBsf0000220772)
palmitoloelycholine	53257	X_13023304_SNP	FBgn0065101	snmRNA:204	UPSTREAM	641	C	A	A	0.1	4	36	-0.8335	8.5912e-10	(TF_binding_site|BDTNP1_TFBS_da|FBsf0000332518);(TF_binding_site|BDTNP1_TFBS_dl|FBsf0000318738);(TF_binding_site|BDTNP1_TFBS_Med|FBsf0000288574);(TF_binding_site|BDTNP1_TFBS_twi|FBsf0000205864);(TF_binding_site|mE1_TFBS_disco|FBsf0000261510);(TF_binding_site|mE1_TFBS_HSA|FBsf0000382025);(TF_binding_site|mE1_TFBS_sens|FBsf0000220772)
palmitoloelycholine	53257	X_13023306_SNP	FBgn0030451	CG15717	INTRON	0	C	A	A	0.1	4	36	-0.8335	8.5912e-10	(TF_binding_site|BDTNP1_TFBS_da|FBsf0000332518);(TF_binding_site|BDTNP1_TFBS_dl|FBsf0000318738);(TF_binding_site|BDTNP1_TFBS_Med|FBsf0000288574);(TF_binding_site|BDTNP1_TFBS_twi|FBsf0000205864);(TF_binding_site|mE1_TFBS_disco|FBsf0000261510);(TF_binding_site|mE1_TFBS_HSA|FBsf0000382025);(TF_binding_site|mE1_TFBS_sens|FBsf0000220772)
palmitoloelycholine	53257	X_13023306_SNP	FBgn0030452	MFS10	INTRON	0	C	A	A	0.1	4	36	-0.8335	8.5912e-10	(TF_binding_site|BDTNP1_TFBS_da|FBsf0000332518);(TF_binding_site|BDTNP1_TFBS_dl|FBsf0000318738);(TF_binding_site|BDTNP1_TFBS_Med|FBsf0000288574);(TF_binding_site|BDTNP1_TFBS_twi|FBsf0000205864);(TF_binding_site|mE1_TFBS_disco|FBsf0000261510);(TF_binding_site|mE1_TFBS_HSA|FBsf0000382025);(TF_binding_site|mE1_TFBS_sens|FBsf0000220772)
palmitoloelycholine	53257	X_13023306_SNP	FBgn0052638	CG32638	UPSTREAM	479	C	A	A	0.1	4	36	-0.8335	8.5912e-10	(TF_binding_site|BDTNP1_TFBS_da|FBsf0000332518);(TF_binding_site|BDTNP1_TFBS_dl|FBsf0000318738);(TF_binding_site|BDTNP1_TFBS_Med|FBsf0000288574);(TF_binding_site|BDTNP1_TFBS_twi|FBsf0000205864);(TF_binding_site|mE1_TFBS_disco|FBsf0000261510);(TF_binding_site|mE1_TFBS_HSA|FBsf0000382025);(TF_binding_site|mE1_TFBS_sens|FBsf0000220772)
palmitoloelycholine	53257	X_13023306_SNP	FBgn0065101	snmRNA:204	UPSTREAM	643	C	A	A	0.1	4	36	-0.8335	8.5912e-10	(TF_binding_site|BDTNP1_TFBS_da|FBsf0000332518);(TF_binding_site|BDTNP1_TFBS_dl|FBsf0000318738);(TF_binding_site|BDTNP1_TFBS_Med|FBsf0000288574);(TF_binding_site|BDTNP1_TFBS_twi|FBsf0000205864);(TF_binding_site|mE1_TFBS_disco|FBsf0000261510);(TF_binding_site|mE1_TFBS_HSA|FBsf0000382025);(TF_binding_site|mE1_TFBS_sens|FBsf0000220772)
palmitoloelycholine	53257	X_13023321_SNP	FBgn0030452	MFS10	INTRON	0	C	A	A	0.1	4	36	-0.8335	8.5912e-10	(TF_binding_site|BDTNP1_TFBS_da|FBsf0000332518);(TF_binding_site|BDTNP1_TFBS_dl|FBsf0000318738);(TF_binding_site|BDTNP1_TFBS_Med|FBsf0000288574);(TF_binding_site|BDTNP1_TFBS_twi|FBsf0000205864);(TF_binding_site|mE1_TFBS_disco|FBsf0000261510);(TF_binding_site|mE1_TFBS_HSA|FBsf0000382025);(TF_binding_site|mE1_TFBS_sens|FBsf0000220772)
palmitoloelycholine	53257	X_13023321_SNP	FBgn0030451	CG15717	INTRON	0	C	A	A	0.1	4	36	-0.8335	8.5912e-10	(TF_binding_site|BDTNP1_TFBS_da|FBsf0000332518);(TF_binding_site|BDTNP1_TFBS_dl|FBsf0000318738);(TF_binding_site|BDTNP1_TFBS_Med|FBsf0000288574);(TF_binding_site|BDTNP1_TFBS_twi|FBsf0000205864);(TF_binding_site|mE1_TFBS_disco|FBsf0000261510);(TF_binding_site|mE1_TFBS_HSA|FBsf0000382025);(TF_binding_site|mE1_TFBS_sens|FBsf0000220772)
palmitoloelycholine	53257	X_13023321_SNP	FBgn0052638	CG32638	UPSTREAM	494	C	A	A	0.1	4	36	-0.8335	8.5912e-10	(TF_binding_site|BDTNP1_TFBS_da|FBsf0000332518);(TF_binding_site|BDTNP1_TFBS_dl|FBsf0000318738);(TF_binding_site|BDTNP1_TFBS_Med|FBsf0000288574);(TF_binding_site|BDTNP1_TFBS_twi|FBsf0000205864);(TF_binding_site|mE1_TFBS_disco|FBsf0000261510);(TF_binding_site|mE1_TFBS_HSA|FBsf0000382025);(TF_binding_site|mE1_TFBS_sens|FBsf0000220772)
palmitoloelycholine	53257	X_13023321_SNP	FBgn0065101	snmRNA:204	UPSTREAM	658	C	A	A	0.1	4	36	-0.8335	8.5912e-10	(TF_binding_site|BDTNP1_TFBS_da|FBsf0000332518);(TF_binding_site|BDTNP1_TFBS_dl|FBsf0000318738);(TF_binding_site|BDTNP1_TFBS_Med|FBsf0000288574);(TF_binding_site|BDTNP1_TFBS_twi|FBsf0000205864);(TF_binding_site|mE1_TFBS_disco|FBsf0000261510);(TF_binding_site|mE1_TFBS_HSA|FBsf0000382025);(TF_binding_site|mE1_TFBS_sens|FBsf0000220772)
palmitoloelycholine	53257	3R_22771125_SNP	FBgn0015541	sda	DOWNSTREAM	94	A	G	G	0.1053	4	34	-0.8352	9.078e-10	(TF_binding_site|BDTNP1_TFBS_Med|FBsf0000286669);(TF_binding_site|mE1_TFBS_D|FBsf0000240246);(TF_binding_site|mE1_TFBS_HSA|FBsf0000375562)
palmitoloelycholine	53257	3R_22771125_SNP	FBgn0039462	CG14252	UPSTREAM	131	A	G	G	0.1053	4	34	-0.8352	9.078e-10	(TF_binding_site|BDTNP1_TFBS_Med|FBsf0000286669);(TF_binding_site|mE1_TFBS_D|FBsf0000240246);(TF_binding_site|mE1_TFBS_HSA|FBsf0000375562)
palmitoloelycholine	53257	2R_11866629_SNP	FBgn0265045	Strn-Mlck	SYNONYMOUS_CODING	0	G	T	T	0.1026	4	35	-0.8318	1.07499e-09	-
palmitoloelycholine	53257	3R_23951223_SNP	Intergenic	Intergenic	Intergenic		T	C	C	0.1026	4	35	-0.8308	1.16311e-09	-
palmitoloelycholine	53257	2L_17349905_SNP	Intergenic	Intergenic	Intergenic		T	C	C	0.1026	4	35	-0.8307	1.17213e-09	-
palmitoloelycholine	53257	3R_22771096_SNP	FBgn0015541	sda	DOWNSTREAM	65	C	T	T	0.1026	4	35	-0.8307	1.17213e-09	(TF_binding_site|BDTNP1_TFBS_Med|FBsf0000286669);(TF_binding_site|mE1_TFBS_D|FBsf0000240246);(TF_binding_site|mE1_TFBS_HSA|FBsf0000375562)
palmitoloelycholine	53257	3R_22771096_SNP	FBgn0039462	CG14252	UPSTREAM	160	C	T	T	0.1026	4	35	-0.8307	1.17213e-09	(TF_binding_site|BDTNP1_TFBS_Med|FBsf0000286669);(TF_binding_site|mE1_TFBS_D|FBsf0000240246);(TF_binding_site|mE1_TFBS_HSA|FBsf0000375562)
palmitoloelycholine	53257	3R_22771112_SNP	FBgn0015541	sda	DOWNSTREAM	81	G	C	C	0.1026	4	35	-0.8307	1.17213e-09	(TF_binding_site|BDTNP1_TFBS_Med|FBsf0000286669);(TF_binding_site|mE1_TFBS_D|FBsf0000240246);(TF_binding_site|mE1_TFBS_HSA|FBsf0000375562)
palmitoloelycholine	53257	3R_22771112_SNP	FBgn0039462	CG14252	UPSTREAM	144	G	C	C	0.1026	4	35	-0.8307	1.17213e-09	(TF_binding_site|BDTNP1_TFBS_Med|FBsf0000286669);(TF_binding_site|mE1_TFBS_D|FBsf0000240246);(TF_binding_site|mE1_TFBS_HSA|FBsf0000375562)
palmitoloelycholine	53257	3R_22771117_SNP	FBgn0015541	sda	DOWNSTREAM	86	C	G	G	0.1026	4	35	-0.8307	1.17213e-09	(TF_binding_site|BDTNP1_TFBS_Med|FBsf0000286669);(TF_binding_site|mE1_TFBS_D|FBsf0000240246);(TF_binding_site|mE1_TFBS_HSA|FBsf0000375562)
palmitoloelycholine	53257	3R_22771117_SNP	FBgn0039462	CG14252	UPSTREAM	139	C	G	G	0.1026	4	35	-0.8307	1.17213e-09	(TF_binding_site|BDTNP1_TFBS_Med|FBsf0000286669);(TF_binding_site|mE1_TFBS_D|FBsf0000240246);(TF_binding_site|mE1_TFBS_HSA|FBsf0000375562)
palmitoloelycholine	53257	2L_16416412_SNP	FBgn0028523	CG5888	INTRON	0	C	T	T	0.1026	4	35	-0.8304	1.20386e-09	(TF_binding_site|mE1_TFBS_cad|FBsf0000242234)
palmitoloelycholine	53257	3L_20455706_SNP	FBgn0036995	CG5195	INTRON	0	A	C	C	0.1026	4	35	-0.8294	1.29802e-09	-
palmitoloelycholine	53257	3L_20455706_SNP	FBgn0036996	mag	DOWNSTREAM	332	A	C	C	0.1026	4	35	-0.8294	1.29802e-09	-
palmitoloelycholine	53257	2L_16315684_SNP	FBgn0000250	cact	INTRON	0	T	G	T	0.1143	4	31	-0.8344	1.34654e-09	(TF_binding_site|BDTNP1_TFBS_dl|FBsf0000298912);(TF_binding_site|BDTNP1_TFBS_twi|FBsf0000201867)
palmitoloelycholine	53257	2R_11864798_SNP	FBgn0265045	Strn-Mlck	NON_SYNONYMOUS_CODING	0	C	T	T	0.1081	4	33	-0.8278	1.78497e-09	-
palmitoloelycholine	53257	2R_4418489_SNP	FBgn0050361	mtt	INTRON	0	G	C	C	0.1026	4	35	-0.8249	1.83399e-09	-
palmitoloelycholine	53257	3R_14383416_SNP	Intergenic	Intergenic	Intergenic		A	T	T	0.1026	4	35	-0.8249	1.83399e-09	-
palmitoloelycholine	53257	3R_22771073_SNP	FBgn0015541	sda	DOWNSTREAM	42	G	T	T	0.1081	4	33	-0.8266	1.96108e-09	(TF_binding_site|BDTNP1_TFBS_Med|FBsf0000286669);(TF_binding_site|mE1_TFBS_HSA|FBsf0000375562)
palmitoloelycholine	53257	3R_22771073_SNP	FBgn0039462	CG14252	UPSTREAM	183	G	T	T	0.1081	4	33	-0.8266	1.96108e-09	(TF_binding_site|BDTNP1_TFBS_Med|FBsf0000286669);(TF_binding_site|mE1_TFBS_HSA|FBsf0000375562)
palmitoloelycholine	53257	2L_9883171_SNP	FBgn0032151	nAChRalpha6	INTRON	0	T	C	C	0.1053	4	34	-0.8238	2.18341e-09	-
palmitoloelycholine	53257	3L_13732352_SNP	FBgn0264001	bru-3	INTRON	0	T	C	C	0.1053	4	34	-0.8227	2.3777e-09	-
palmitoloelycholine	53257	2R_15411935_DEL	FBgn0003435	sm	UTR_3_PRIME	0	A	AA	AA	0.1081	4	33	-0.8231	2.5576e-09	-
palmitoloelycholine	53257	3L_12619144_SNP	Intergenic	Intergenic	Intergenic		A	C	C	0.1282	5	34	-0.744	2.68161e-09	(TF_binding_site|BDTNP1_TFBS_twi|FBsf0000203595);(TF_binding_site|mE1_TFBS_HSA|FBsf0000364626)
palmitoloelycholine	53257	3L_13740233_SNP	FBgn0264001	bru-3	INTRON	0	G	T	T	0.1143	4	31	-0.8235	3.04594e-09	-
palmitoloelycholine	53257	3L_11232271_SNP	Intergenic	Intergenic	Intergenic		T	C	C	0.125	5	35	-0.7387	3.67059e-09	(TF_binding_site|BDTNP1_TFBS_twi|FBsf0000203464)
palmitoloelycholine	53257	3L_14762448_SNP	FBgn0036448	mop	UTR_3_PRIME	0	T	A	A	0.125	5	35	-0.7387	3.67059e-09	-
palmitoloelycholine	53257	3L_14762448_SNP	FBgn0036447	CG17173	UPSTREAM	65	T	A	A	0.125	5	35	-0.7387	3.67059e-09	-
palmitoloelycholine	53257	2R_4330834_SNP	FBgn0033292	Cyp4ad1	UPSTREAM	523	A	G	G	0.1176	4	30	-0.8194	4.56921e-09	-
palmitoloelycholine	53257	3L_12379593_SNP	FBgn0036279	Ncc69	INTRON	0	A	C	C	0.1282	5	34	-0.7302	7.92095e-09	(TF_binding_site|mE1_TFBS_cnc|FBsf0000206508)
palmitoylcarnitine	44681	2L_13088331_SNP	Intergenic	Intergenic	Intergenic		C	G	G	0.35	14	26	-0.2101	2.06763e-08	(TF_binding_site|mE1_TFBS_hkb|FBsf0000255099);(TF_binding_site|mE1_TFBS_HSA|FBsf0000350704)
palmitoylcholine	52944	3L_1371431_SNP	FBgn0003138	Ptp61F	INTRON	0	A	C	C	0.1026	4	35	-0.5691	3.3901e-10	-
palmitoylcholine	52944	3L_1371431_SNP	FBgn0003295	ru	INTRON	0	A	C	C	0.1026	4	35	-0.5691	3.3901e-10	-
palmitoylcholine	52944	3R_18623852_SNP	Intergenic	Intergenic	Intergenic		A	T	T	0.1	4	36	-0.5579	4.0848e-10	-
palmitoylcholine	52944	3L_20845904_SNP	FBgn0052432	CG32432	INTRON	0	T	C	C	0.1053	4	34	-0.5648	7.1217e-10	-
palmitoylcholine	52944	3L_15742529_SNP	FBgn0266775	CR45240	DOWNSTREAM	730	C	A	A	0.1026	4	35	-0.5817	7.1334e-10	-
palmitoylcholine	52944	2L_5269566_SNP	FBgn0003716	tkv	INTRON	0	G	C	C	0.1282	5	34	-0.5276	7.5475e-10	-
palmitoylcholine	52944	2L_5269566_SNP	FBgn0031695	Cyp4ac3	SYNONYMOUS_CODING	0	G	C	C	0.1282	5	34	-0.5276	7.5475e-10	-
palmitoylcholine	52944	2R_14639027_SNP	FBgn0053147	Hs3st-A	INTRON	0	A	G	G	0.1	4	36	-0.5764	1.1893e-09	(TF_binding_site|BDTNP1_TFBS_sna|FBsf0000267888);(TF_binding_site|mE1_TFBS_chinmo|FBsf0000211554)
palmitoylcholine	52944	X_4314786_SNP	FBgn0052773	CR32773	INTRON	0	C	T	T	0.1579	6	32	-0.4688	1.07555e-08	(TF_binding_site|BDTNP1_TFBS_dl|FBsf0000316531);(TF_binding_site|mE1_TFBS_cad|FBsf0000242834);(TF_binding_site|mE1_TFBS_HSA|FBsf0000379160);(TF_binding_site|mE1_TFBS_inv|FBsf0000235248)
palmitoylcholine	52944	X_4314786_SNP	FBgn0000179	bi	INTRON	0	C	T	T	0.1579	6	32	-0.4688	1.07555e-08	(TF_binding_site|BDTNP1_TFBS_dl|FBsf0000316531);(TF_binding_site|mE1_TFBS_cad|FBsf0000242834);(TF_binding_site|mE1_TFBS_HSA|FBsf0000379160);(TF_binding_site|mE1_TFBS_inv|FBsf0000235248)
palmitoylcholine	52944	3L_12652819_SNP	FBgn0265746	CR44553	EXON	0	C	T	T	0.125	5	35	-0.5035	1.10525e-08	-
palmitoylcholine	52944	3L_15751484_SNP	Intergenic	Intergenic	Intergenic		A	T	T	0.125	5	35	-0.5035	1.10525e-08	(TF_binding_site|BDTNP1_TFBS_da|FBsf0000327267);(TF_binding_site|BDTNP1_TFBS_twi|FBsf0000203962);(TF_binding_site|mE1_TFBS_HSA|FBsf0000365640);(TF_binding_site|mE1_TFBS_Kr|FBsf0000253595)
palmitoylcholine	52944	3L_15751496_SNP	Intergenic	Intergenic	Intergenic		A	C	C	0.125	5	35	-0.5035	1.10525e-08	(TF_binding_site|BDTNP1_TFBS_da|FBsf0000327267);(TF_binding_site|BDTNP1_TFBS_twi|FBsf0000203962);(TF_binding_site|mE1_TFBS_HSA|FBsf0000365640);(TF_binding_site|mE1_TFBS_Kr|FBsf0000253595)
palmitoylcholine	52944	X_12400422_SNP	FBgn0030396	CG2556	INTRON	0	A	G	G	0.125	5	35	-0.5035	1.10525e-08	-
palmitoylcholine	52944	X_4314775_SNP	FBgn0000179	bi	INTRON	0	A	T	T	0.1026	4	35	-0.5556	1.14154e-08	(TF_binding_site|BDTNP1_TFBS_dl|FBsf0000316531);(TF_binding_site|mE1_TFBS_cad|FBsf0000242834);(TF_binding_site|mE1_TFBS_HSA|FBsf0000379160);(TF_binding_site|mE1_TFBS_inv|FBsf0000235248)
palmitoylcholine	52944	X_4314775_SNP	FBgn0052773	CR32773	INTRON	0	A	T	T	0.1026	4	35	-0.5556	1.14154e-08	(TF_binding_site|BDTNP1_TFBS_dl|FBsf0000316531);(TF_binding_site|mE1_TFBS_cad|FBsf0000242834);(TF_binding_site|mE1_TFBS_HSA|FBsf0000379160);(TF_binding_site|mE1_TFBS_inv|FBsf0000235248)
palmitoylcholine	52944	2L_12492824_DEL	FBgn0259176	bun	INTRON	0	G	GGCCAC	GGCCAC	0.125	5	35	-0.4763	1.15182e-08	-
palmitoylcholine	52944	2L_12492832_SNP	FBgn0259176	bun	INTRON	0	T	A	A	0.125	5	35	-0.4763	1.15182e-08	-
palmitoylcholine	52944	2R_16732061_SNP	Intergenic	Intergenic	Intergenic		C	A	A	0.175	7	33	-0.4082	1.18524e-08	-
palmitoylcholine	52944	X_12400486_DEL	FBgn0030396	CG2556	INTRON	0	A	AT	AT	0.1282	5	34	-0.5035	1.21998e-08	-
palmitoylcholine	52944	X_3056581_SNP	FBgn0004647	N	INTRON	0	A	G	G	0.1026	4	35	-0.5549	1.22319e-08	(TF_binding_site|BDTNP1_TFBS_da|FBsf0000331526);(TF_binding_site|BDTNP1_TFBS_dl|FBsf0000316239);(TF_binding_site|BDTNP1_TFBS_hb|FBsf0000291749);(TF_binding_site|BDTNP1_TFBS_Med|FBsf0000287608);(TF_binding_site|BDTNP1_TFBS_prd|FBsf0000275914);(TF_binding_site|BDTNP1_TFBS_slp1|FBsf0000273363);(TF_binding_site|BDTNP1_TFBS_twi|FBsf0000204960);(TF_binding_site|BDTNP1_TFBS_z|FBsf0000198106);(TF_binding…
palmitoylcholine	52944	X_4314788_SNP	FBgn0000179	bi	INTRON	0	C	T	T	0.1795	7	32	-0.4382	1.28554e-08	(TF_binding_site|BDTNP1_TFBS_dl|FBsf0000316531);(TF_binding_site|mE1_TFBS_cad|FBsf0000242834);(TF_binding_site|mE1_TFBS_HSA|FBsf0000379160);(TF_binding_site|mE1_TFBS_inv|FBsf0000235248)
palmitoylcholine	52944	X_4314788_SNP	FBgn0052773	CR32773	INTRON	0	C	T	T	0.1795	7	32	-0.4382	1.28554e-08	(TF_binding_site|BDTNP1_TFBS_dl|FBsf0000316531);(TF_binding_site|mE1_TFBS_cad|FBsf0000242834);(TF_binding_site|mE1_TFBS_HSA|FBsf0000379160);(TF_binding_site|mE1_TFBS_inv|FBsf0000235248)
palmitoylcholine	52944	2L_10198258_SNP	FBgn0028675	Sur	INTRON	0	A	T	T	0.1282	5	34	-0.502	1.4322e-08	-
palmitoylcholine	52944	X_3059637_SNP	FBgn0004647	N	SYNONYMOUS_CODING	0	T	G	G	0.1026	4	35	-0.5517	1.65543e-08	(TF_binding_site|BDTNP1_TFBS_sna|FBsf0000269874);(TF_binding_site|mE1_TFBS_cad|FBsf0000242800);(TF_binding_site|mE1_TFBS_chinmo|FBsf0000208251);(TF_binding_site|mE1_TFBS_HSA|FBsf0000378786);(TF_binding_site|mE1_TFBS_sens|FBsf0000219389)
palmitoylcholine	52944	2L_5411726_SNP	FBgn0016660	H15	INTRON	0	A	G	G	0.1	4	36	-0.5495	1.8864e-08	(TF_binding_site|BDTNP1_TFBS_da|FBsf0000321513);(TF_binding_site|BDTNP1_TFBS_dl|FBsf0000296814);(TF_binding_site|BDTNP1_TFBS_gt|FBsf0000293052);(TF_binding_site|BDTNP1_TFBS_hb|FBsf0000290589);(TF_binding_site|BDTNP1_TFBS_prd|FBsf0000274834);(TF_binding_site|BDTNP1_TFBS_slp1|FBsf0000271695);(TF_binding_site|BDTNP1_TFBS_twi|FBsf0000200901);(TF_binding_site|mE1_TFBS_cad|FBsf0000241431);(TF_binding_s…
palmitoylcholine	52944	2L_5411727_SNP	FBgn0016660	H15	INTRON	0	T	A	A	0.1	4	36	-0.5495	1.8864e-08	(TF_binding_site|BDTNP1_TFBS_da|FBsf0000321513);(TF_binding_site|BDTNP1_TFBS_dl|FBsf0000296814);(TF_binding_site|BDTNP1_TFBS_gt|FBsf0000293052);(TF_binding_site|BDTNP1_TFBS_hb|FBsf0000290589);(TF_binding_site|BDTNP1_TFBS_prd|FBsf0000274834);(TF_binding_site|BDTNP1_TFBS_slp1|FBsf0000271695);(TF_binding_site|BDTNP1_TFBS_twi|FBsf0000200901);(TF_binding_site|mE1_TFBS_cad|FBsf0000241431);(TF_binding_s…
palmitoylcholine	52944	2L_5411757_SNP	FBgn0016660	H15	INTRON	0	T	A	A	0.1	4	36	-0.5495	1.8864e-08	(TF_binding_site|BDTNP1_TFBS_da|FBsf0000321513);(TF_binding_site|BDTNP1_TFBS_dl|FBsf0000296814);(TF_binding_site|BDTNP1_TFBS_gt|FBsf0000293052);(TF_binding_site|BDTNP1_TFBS_hb|FBsf0000290589);(TF_binding_site|BDTNP1_TFBS_prd|FBsf0000274834);(TF_binding_site|BDTNP1_TFBS_slp1|FBsf0000271695);(TF_binding_site|BDTNP1_TFBS_twi|FBsf0000200901);(TF_binding_site|mE1_TFBS_cad|FBsf0000241431);(TF_binding_s…
palmitoylcholine	52944	2R_19141969_SNP	Intergenic	Intergenic	Intergenic		G	C	C	0.1	4	36	-0.5495	1.8864e-08	-
palmitoylcholine	52944	3L_1372329_SNP	FBgn0003295	ru	INTRON	0	A	T	T	0.1	4	36	-0.5495	1.8864e-08	-
palmitoylcholine	52944	3L_1372329_SNP	FBgn0003138	Ptp61F	INTRON	0	A	T	T	0.1	4	36	-0.5495	1.8864e-08	-
palmitoylcholine	52944	2L_8043987_SNP	FBgn0031981	CG7466	SYNONYMOUS_CODING	0	T	C	T	0.2895	11	27	-0.3724	2.02017e-08	(TF_binding_site|BDTNP1_TFBS_dl|FBsf0000297406);(TF_binding_site|BDTNP1_TFBS_twi|FBsf0000201189);(TF_binding_site|mE1_TFBS_HSA|FBsf0000346614)
palmitoylcholine	52944	2L_8044231_SNP	FBgn0031981	CG7466	INTRON	0	T	C	T	0.2895	11	27	-0.3724	2.02017e-08	(TF_binding_site|BDTNP1_TFBS_dl|FBsf0000297406);(TF_binding_site|BDTNP1_TFBS_Med|FBsf0000277949);(TF_binding_site|mE1_TFBS_HSA|FBsf0000346614)
palmitoylcholine	52944	2L_8044245_SNP	FBgn0031981	CG7466	INTRON	0	A	G	A	0.2895	11	27	-0.3724	2.02017e-08	(TF_binding_site|BDTNP1_TFBS_dl|FBsf0000297406);(TF_binding_site|BDTNP1_TFBS_Med|FBsf0000277949);(TF_binding_site|mE1_TFBS_HSA|FBsf0000346614)
palmitoylcholine	52944	3L_1375366_SNP	FBgn0003138	Ptp61F	INTRON	0	A	G	G	0.1053	4	34	-0.5485	2.40558e-08	-
palmitoylcholine	52944	3L_1375366_SNP	FBgn0003295	ru	INTRON	0	A	G	G	0.1053	4	34	-0.5485	2.40558e-08	-
palmitoylcholine	52944	2R_19142012_SNP	Intergenic	Intergenic	Intergenic		G	A	A	0.1026	4	35	-0.5474	2.47856e-08	-
palmitoylcholine	52944	2R_19142022_SNP	Intergenic	Intergenic	Intergenic		A	T	T	0.1026	4	35	-0.5474	2.47856e-08	-
palmitoylcholine	52944	X_12400612_SNP	FBgn0030396	CG2556	INTRON	0	G	A	A	0.1316	5	33	-0.497	2.62629e-08	-
palmitoylcholine	52944	2L_18433602_SNP	FBgn0265681	CR44488	EXON	0	G	A	A	0.1538	6	33	-0.4585	2.97072e-08	-
phenylalanylalanine	41374	2L_8037703_SNP	FBgn0031976	CG7367	INTRON	0	C	T	T	0.125	5	35	-1.407	3.69273e-09	(TF_binding_site|mE1_TFBS_HSA|FBsf0000346610);(TF_binding_site|mE1_TFBS_sens|FBsf0000216712)
phenylalanylalanine	41374	2L_8037703_SNP	FBgn0044323	Cka	SYNONYMOUS_CODING	0	C	T	T	0.125	5	35	-1.407	3.69273e-09	(TF_binding_site|mE1_TFBS_HSA|FBsf0000346610);(TF_binding_site|mE1_TFBS_sens|FBsf0000216712)
phenylalanylalanine	41374	2L_8037695_SNP	FBgn0031976	CG7367	INTRON	0	A	G	G	0.1026	4	35	-1.481	1.28172e-08	(TF_binding_site|mE1_TFBS_HSA|FBsf0000346610);(TF_binding_site|mE1_TFBS_sens|FBsf0000216712)
phenylalanylalanine	41374	2L_8037695_SNP	FBgn0044323	Cka	NON_SYNONYMOUS_CODING	0	A	G	G	0.1026	4	35	-1.481	1.28172e-08	(TF_binding_site|mE1_TFBS_HSA|FBsf0000346610);(TF_binding_site|mE1_TFBS_sens|FBsf0000216712)
phenylalanylalanine	41374	2R_11047135_SNP	FBgn0013467	igl	INTRON	0	T	A	A	0.1053	4	34	-1.451	2.35574e-08	-
phenylalanylalanine	41374	2R_11047135_SNP	FBgn0264379	CR43831	UPSTREAM	85	T	A	A	0.1053	4	34	-1.451	2.35574e-08	-
phenylalanylglycine	41370	2L_7455411_SNP	FBgn0045495	Gr28b	SYNONYMOUS_CODING	0	G	A	A	0.1026	4	35	-1.214	2.12387e-08	-
phenylalanylglycine	41370	2L_8037695_SNP	FBgn0031976	CG7367	INTRON	0	A	G	G	0.1026	4	35	-1.213	2.21665e-08	(TF_binding_site|mE1_TFBS_HSA|FBsf0000346610);(TF_binding_site|mE1_TFBS_sens|FBsf0000216712)
phenylalanylglycine	41370	2L_8037695_SNP	FBgn0044323	Cka	NON_SYNONYMOUS_CODING	0	A	G	G	0.1026	4	35	-1.213	2.21665e-08	(TF_binding_site|mE1_TFBS_HSA|FBsf0000346610);(TF_binding_site|mE1_TFBS_sens|FBsf0000216712)
phenylalanylglycine	41370	2L_12874753_DEL	Intergenic	Intergenic	Intergenic		C	CAC	CAC	0.1053	4	34	-1.211	2.60338e-08	-
phenyllactate (PLA)	22130	3R_13643247_SNP	FBgn0261649	tinc	INTRON	0	C	T	T	0.1111	4	32	-4.074	6.8352e-10	-
phenyllactate (PLA)	22130	2L_2317251_SNP	FBgn0031413	CG9967	INTRON	0	G	T	T	0.1	4	36	-3.848	1.41173e-08	-
phenyllactate (PLA)	22130	2L_2317251_SNP	FBgn0031414	eys	INTRON	0	G	T	T	0.1	4	36	-3.848	1.41173e-08	-
phenyllactate (PLA)	22130	2L_2317256_SNP	FBgn0031413	CG9967	INTRON	0	A	G	G	0.1	4	36	-3.848	1.41173e-08	-
phenyllactate (PLA)	22130	2L_2317256_SNP	FBgn0031414	eys	INTRON	0	A	G	G	0.1	4	36	-3.848	1.41173e-08	-
phenyllactate (PLA)	22130	2L_2318193_SNP	FBgn0031413	CG9967	INTRON	0	A	T	T	0.1	4	36	-3.848	1.41173e-08	-
phenyllactate (PLA)	22130	2L_2318193_SNP	FBgn0031414	eys	INTRON	0	A	T	T	0.1	4	36	-3.848	1.41173e-08	-
phenyllactate (PLA)	22130	2L_2318195_SNP	FBgn0031413	CG9967	INTRON	0	T	C	C	0.1	4	36	-3.848	1.41173e-08	-
phenyllactate (PLA)	22130	2L_2318195_SNP	FBgn0031414	eys	INTRON	0	T	C	C	0.1	4	36	-3.848	1.41173e-08	-
phenyllactate (PLA)	22130	2L_2318427_SNP	FBgn0031413	CG9967	INTRON	0	A	G	G	0.1	4	36	-3.848	1.41173e-08	-
phenyllactate (PLA)	22130	2L_2318427_SNP	FBgn0031414	eys	INTRON	0	A	G	G	0.1	4	36	-3.848	1.41173e-08	-
phenyllactate (PLA)	22130	X_10436856_SNP	FBgn0085443	spri	INTRON	0	T	G	G	0.1111	4	32	-3.847	1.97091e-08	-
phenyllactate (PLA)	22130	2L_2317242_SNP	FBgn0031413	CG9967	INTRON	0	C	A	A	0.1053	4	34	-3.831	2.04919e-08	-
phenyllactate (PLA)	22130	2L_2317242_SNP	FBgn0031414	eys	INTRON	0	C	A	A	0.1053	4	34	-3.831	2.04919e-08	-
phenyllactate (PLA)	22130	2L_7451570_DEL	FBgn0025697	santa-maria	UPSTREAM	327	T	TTAA	TTAA	0.1143	4	31	-3.843	2.26103e-08	-
phenyllactate (PLA)	22130	2L_7451570_DEL	FBgn0041247	Gr28a	DOWNSTREAM	949	T	TTAA	TTAA	0.1143	4	31	-3.843	2.26103e-08	-
phenyllactate (PLA)	22130	2L_7451600_DEL	FBgn0025697	santa-maria	UPSTREAM	357	G	GA	GA	0.1316	5	33	-3.467	2.39816e-08	-
phenyllactate (PLA)	22130	2L_7451600_DEL	FBgn0041247	Gr28a	DOWNSTREAM	919	G	GA	GA	0.1316	5	33	-3.467	2.39816e-08	-
phenyllactate (PLA)	22130	2L_7451603_SNP	FBgn0025697	santa-maria	UPSTREAM	359	C	A	A	0.1316	5	33	-3.467	2.39816e-08	-
phenyllactate (PLA)	22130	2L_7451603_SNP	FBgn0041247	Gr28a	DOWNSTREAM	917	C	A	A	0.1316	5	33	-3.467	2.39816e-08	-
phenyllactate (PLA)	22130	2L_7451584_SNP	FBgn0025697	santa-maria	UPSTREAM	340	T	C	C	0.1351	5	32	-3.473	2.44025e-08	-
phenyllactate (PLA)	22130	2L_7451584_SNP	FBgn0041247	Gr28a	DOWNSTREAM	936	T	C	C	0.1351	5	32	-3.473	2.44025e-08	-
phenyllactate (PLA)	22130	3R_13643258_SNP	FBgn0261649	tinc	INTRON	0	G	A	A	0.1351	5	32	-3.463	2.85325e-08	-
phosphoethanolamine	1600	X_21904747_SNP	FBgn0027279	l_1_G0196	INTRON	0	C	T	T	0.15	6	34	-0.4402	1.25802e-08	-
phosphothreonine	37453	3L_3853988_INS	FBgn0013751	Awh	INTRON	0	T	TATCT	T	0.1111	4	32	-0.5983	2.9306e-11	(TF_binding_site|mE1_TFBS_cad|FBsf0000244174)
phosphothreonine	37453	3R_21670983_SNP	FBgn0267214	CR45654	UPSTREAM	417	A	C	C	0.1081	4	33	-0.595	4.0574e-11	-
phosphothreonine	37453	3R_21670983_SNP	FBgn0267213	CR45653	DOWNSTREAM	883	A	C	C	0.1081	4	33	-0.595	4.0574e-11	-
phosphothreonine	37453	X_8873126_SNP	FBgn0264384	CR43836	INTRON	0	T	C	C	0.1	4	36	-0.5881	7.3306e-11	-
phosphothreonine	37453	X_8873126_SNP	FBgn0261549	rdgA	INTRON	0	T	C	C	0.1	4	36	-0.5881	7.3306e-11	-
phosphothreonine	37453	X_8685507_INS	FBgn0026411	Lim1	INTRON	0	T	TGTTGCAAGTT	T	0.1053	4	34	-0.5833	1.7575e-10	-
phosphothreonine	37453	2R_7021607_DEL	Intergenic	Intergenic	Intergenic		T	TTGGGCGGT	TTGGGCGGT	0.1176	4	30	-0.5841	2.6579e-10	-
phosphothreonine	37453	X_15285589_SNP	FBgn0263257	Cngl	INTRON	0	T	C	C	0.1	4	36	-0.5782	2.6889e-10	-
phosphothreonine	37453	X_9744767_SNP	FBgn0052698	CG32698	UTR_3_PRIME	0	A	T	T	0.1538	6	33	-0.4636	6.1805e-09	-
phosphothreonine	37453	3R_16576238_SNP	FBgn0259222	CG42322	INTRON	0	C	G	G	0.1316	5	33	-0.4997	7.43436e-09	-
phosphothreonine	37453	3R_7419329_SNP	FBgn0051363	Jupiter	INTRON	0	T	C	C	0.1081	4	33	-0.5455	1.31001e-08	-
phosphothreonine	37453	2L_8271744_SNP	FBgn0003502	Btk29A	INTRON	0	T	A	A	0.1053	4	34	-0.5368	2.76573e-08	-
pseudouridine	33442	3L_7027966_SNP	FBgn0260660	Mp	INTRON	0	G	A	A	0.1026	4	35	-0.412	2.55778e-09	-
pseudouridine	33442	2L_2350295_SNP	FBgn0031413	CG9967	INTRON	0	C	T	T	0.1026	4	35	-0.3822	2.73817e-08	-
pseudouridine	33442	2L_2350295_SNP	FBgn0031414	eys	INTRON	0	C	T	T	0.1026	4	35	-0.3822	2.73817e-08	-
pterin	43023	3L_14282143_SNP	FBgn0001085	fz	INTRON	0	T	C	C	0.2105	8	30	-0.5766	5.458e-12	-
pterin	43023	X_16171881_SNP	FBgn0004066	Prosalpha4	DOWNSTREAM	261	A	G	G	0.1579	6	32	-0.6012	3.54599e-09	(TF_binding_site|BDTNP1_TFBS_dl|FBsf0000319490);(TF_binding_site|BDTNP1_TFBS_hb|FBsf0000292043);(TF_binding_site|BDTNP1_TFBS_Med|FBsf0000288830);(TF_binding_site|BDTNP1_TFBS_twi|FBsf0000263437);(TF_binding_site|BDTNP1_TFBS_z|FBsf0000198373);(TF_binding_site|mE1_TFBS_cnc|FBsf0000206819);(TF_binding_site|mE1_TFBS_hkb|FBsf0000256153);(TF_binding_site|mE1_TFBS_HSA|FBsf0000348471);(TF_binding_site|mE1…
pterin	43023	X_16171881_SNP	FBgn0000536	eas	UPSTREAM	480	A	G	G	0.1579	6	32	-0.6012	3.54599e-09	(TF_binding_site|BDTNP1_TFBS_dl|FBsf0000319490);(TF_binding_site|BDTNP1_TFBS_hb|FBsf0000292043);(TF_binding_site|BDTNP1_TFBS_Med|FBsf0000288830);(TF_binding_site|BDTNP1_TFBS_twi|FBsf0000263437);(TF_binding_site|BDTNP1_TFBS_z|FBsf0000198373);(TF_binding_site|mE1_TFBS_cnc|FBsf0000206819);(TF_binding_site|mE1_TFBS_hkb|FBsf0000256153);(TF_binding_site|mE1_TFBS_HSA|FBsf0000348471);(TF_binding_site|mE1…
pterin	43023	X_16171919_SNP	FBgn0004066	Prosalpha4	DOWNSTREAM	299	C	T	T	0.1622	6	31	-0.5998	5.68295e-09	(TF_binding_site|BDTNP1_TFBS_dl|FBsf0000319490);(TF_binding_site|BDTNP1_TFBS_hb|FBsf0000292043);(TF_binding_site|BDTNP1_TFBS_Med|FBsf0000288830);(TF_binding_site|BDTNP1_TFBS_twi|FBsf0000263437);(TF_binding_site|BDTNP1_TFBS_z|FBsf0000198373);(TF_binding_site|mE1_TFBS_cnc|FBsf0000206819);(TF_binding_site|mE1_TFBS_hkb|FBsf0000256153);(TF_binding_site|mE1_TFBS_HSA|FBsf0000348471);(TF_binding_site|mE1…
pterin	43023	X_16171919_SNP	FBgn0000536	eas	UPSTREAM	442	C	T	T	0.1622	6	31	-0.5998	5.68295e-09	(TF_binding_site|BDTNP1_TFBS_dl|FBsf0000319490);(TF_binding_site|BDTNP1_TFBS_hb|FBsf0000292043);(TF_binding_site|BDTNP1_TFBS_Med|FBsf0000288830);(TF_binding_site|BDTNP1_TFBS_twi|FBsf0000263437);(TF_binding_site|BDTNP1_TFBS_z|FBsf0000198373);(TF_binding_site|mE1_TFBS_cnc|FBsf0000206819);(TF_binding_site|mE1_TFBS_hkb|FBsf0000256153);(TF_binding_site|mE1_TFBS_HSA|FBsf0000348471);(TF_binding_site|mE1…
pterin	43023	X_6275747_SNP	Intergenic	Intergenic	Intergenic		C	T	T	0.1282	5	34	-0.638	7.65994e-09	-
pterin	43023	2L_18286314_SNP	FBgn0051787	CG31787	UPSTREAM	594	T	G	G	0.1351	5	32	-0.6383	9.93277e-09	-
pterin	43023	2L_18263981_SNP	FBgn0261804	CG42750	INTRON	0	A	G	G	0.125	5	35	-0.6332	1.12071e-08	-
pterin	43023	2L_18277562_SNP	Intergenic	Intergenic	Intergenic		T	C	C	0.125	5	35	-0.6332	1.12071e-08	-
pterin	43023	2L_18285870_SNP	FBgn0051787	CG31787	UPSTREAM	150	T	A	A	0.125	5	35	-0.6332	1.12071e-08	-
pterin	43023	2L_18286126_SNP	FBgn0051787	CG31787	UPSTREAM	406	C	G	G	0.125	5	35	-0.6332	1.12071e-08	-
pterin	43023	X_9015619_SNP	FBgn0030090	fend	DOWNSTREAM	387	T	A	T	0.125	4	28	-0.6247	1.50948e-08	-
pterin	43023	X_9015619_SNP	FBgn0267099	CR45539	UPSTREAM	668	T	A	T	0.125	4	28	-0.6247	1.50948e-08	-
pterin	43023	2L_10052528_SNP	FBgn0266168	CR44874	DOWNSTREAM	239	T	A	A	0.15	6	34	-0.585	1.74345e-08	-
pterin	43023	3L_11698343_SNP	FBgn0036196	CG11658	INTRON	0	A	C	C	0.1282	5	34	-0.6308	1.78735e-08	-
pterin	43023	3L_11698588_SNP	FBgn0036196	CG11658	INTRON	0	C	G	G	0.1282	5	34	-0.6308	1.78735e-08	-
pterin	43023	2L_9352142_SNP	Intergenic	Intergenic	Intergenic		A	C	C	0.1	4	36	-0.6652	1.84188e-08	-
pterin	43023	2R_12362186_SNP	Intergenic	Intergenic	Intergenic		C	A	A	0.1282	5	34	-0.6279	2.19142e-08	(TF_binding_site|mE1_TFBS_HSA|FBsf0000357452)
pterin	43023	2R_3605127_SNP	FBgn0042135	CG18812	DOWNSTREAM	657	A	G	G	0.175	7	33	-0.5408	2.25388e-08	(TF_binding_site|mE1_TFBS_HSA|FBsf0000354283);(TF_binding_site|mE1_TFBS_sens|FBsf0000226696)
pterin	43023	2R_3605127_SNP	FBgn0033216	CG1946	DOWNSTREAM	841	A	G	G	0.175	7	33	-0.5408	2.25388e-08	(TF_binding_site|mE1_TFBS_HSA|FBsf0000354283);(TF_binding_site|mE1_TFBS_sens|FBsf0000226696)
pterin	43023	2R_3605132_SNP	FBgn0042135	CG18812	DOWNSTREAM	652	T	G	G	0.175	7	33	-0.5408	2.25388e-08	(TF_binding_site|mE1_TFBS_HSA|FBsf0000354283);(TF_binding_site|mE1_TFBS_sens|FBsf0000226696)
pterin	43023	2R_3605132_SNP	FBgn0033216	CG1946	DOWNSTREAM	846	T	G	G	0.175	7	33	-0.5408	2.25388e-08	(TF_binding_site|mE1_TFBS_HSA|FBsf0000354283);(TF_binding_site|mE1_TFBS_sens|FBsf0000226696)
pterin	43023	2R_16734465_SNP	Intergenic	Intergenic	Intergenic		G	A	A	0.1795	7	32	-0.5426	2.40378e-08	(TF_binding_site|BDTNP1_TFBS_da|FBsf0000324927);(TF_binding_site|BDTNP1_TFBS_dl|FBsf0000303508);(TF_binding_site|BDTNP1_TFBS_twi|FBsf0000199971);(TF_binding_site|mE1_TFBS_HSA|FBsf0000358836)
pterin	43023	3L_4739752_SNP	FBgn0035574	RhoGEF64C	INTRON	0	G	A	A	0.1026	4	35	-0.6621	2.46728e-08	(TF_binding_site|mE1_TFBS_inv|FBsf0000235759)
pterin	43023	2R_8866271_SNP	FBgn0005624	Psc	INTRON	0	A	G	G	0.1842	7	31	-0.5446	2.98147e-08	(TF_binding_site|BDTNP1_TFBS_dl|FBsf0000301769);(TF_binding_site|BDTNP1_TFBS_hb|FBsf0000290128);(TF_binding_site|BDTNP1_TFBS_Med|FBsf0000280146);(TF_binding_site|BDTNP1_TFBS_twi|FBsf0000199222)
ribitol	15772	2R_20011753_SNP	FBgn0264299	CG43777	NON_SYNONYMOUS_CODING	0	C	T	T	0.1	4	36	-1.356	2.0256e-10	(TF_binding_site|mE1_TFBS_cad|FBsf0000247421);(TF_binding_site|mE1_TFBS_chinmo|FBsf0000211997)
ribitol	15772	2R_20011753_SNP	FBgn0264298	CG43776	UTR_3_PRIME	0	C	T	T	0.1	4	36	-1.356	2.0256e-10	(TF_binding_site|mE1_TFBS_cad|FBsf0000247421);(TF_binding_site|mE1_TFBS_chinmo|FBsf0000211997)
ribitol	15772	2R_20011753_SNP	FBgn0264297	CG43775	UTR_3_PRIME	0	C	T	T	0.1	4	36	-1.356	2.0256e-10	(TF_binding_site|mE1_TFBS_cad|FBsf0000247421);(TF_binding_site|mE1_TFBS_chinmo|FBsf0000211997)
ribitol	15772	2R_20011753_SNP	FBgn0034978	CG3257	DOWNSTREAM	967	C	T	T	0.1	4	36	-1.356	2.0256e-10	(TF_binding_site|mE1_TFBS_cad|FBsf0000247421);(TF_binding_site|mE1_TFBS_chinmo|FBsf0000211997)
ribitol	15772	2L_1315109_SNP	Intergenic	Intergenic	Intergenic		T	G	G	0.1053	4	34	-1.347	2.6585e-10	(TF_binding_site|BDTNP1_TFBS_twi|FBsf0000200559)
ribitol	15772	2L_16956476_SNP	Intergenic	Intergenic	Intergenic		T	G	G	0.1026	4	35	-1.344	4.3261e-10	(TF_binding_site|mE1_TFBS_HSA|FBsf0000351790);(TF_binding_site|mE1_TFBS_sbb|FBsf0000249975)
ribitol	15772	2R_19131575_SNP	FBgn0040063	yip3	UTR_3_PRIME	0	T	G	G	0.1515	5	28	-1.181	2.75638e-09	-
ribitol	15772	2L_3667878_SNP	FBgn0085369	CG34340	INTRON	0	T	A	A	0.1282	5	34	-1.154	5.61607e-09	-
ribitol	15772	2L_3667878_SNP	FBgn0259951	Sfp24Ba	DOWNSTREAM	99	T	A	A	0.1282	5	34	-1.154	5.61607e-09	-
ribitol	15772	2L_3667878_SNP	FBgn0259953	CG42463	DOWNSTREAM	813	T	A	A	0.1282	5	34	-1.154	5.61607e-09	-
ribitol	15772	3L_1580793_SNP	FBgn0035237	CG13917	INTRON	0	T	C	C	0.25	10	30	-0.8701	2.19746e-08	-
ribose	1471	3L_21939591_SNP	FBgn0037142	CG14562	INTRON	0	G	A	A	0.1351	5	32	-0.848	1.9915e-09	-
ribose	1471	2R_4041236_SNP	FBgn0263593	Lpin	INTRON	0	A	G	G	0.1	4	36	-0.9236	2.92282e-09	-
ribose	1471	2R_4041236_SNP	FBgn0010504	kermit	INTRON	0	A	G	G	0.1	4	36	-0.9236	2.92282e-09	-
ribose	1471	3L_6976528_SNP	FBgn0250849	CG32388	DOWNSTREAM	45	T	G	G	0.1282	5	34	-0.8239	8.4574e-09	(TF_binding_site|mE1_TFBS_sens|FBsf0000223296)
ribose	1471	3L_6976528_SNP	FBgn0263387	CG43439	DOWNSTREAM	45	T	G	G	0.1282	5	34	-0.8239	8.4574e-09	(TF_binding_site|mE1_TFBS_sens|FBsf0000223296)
ribose	1471	2L_7778600_SNP	FBgn0020880	CG7179	UPSTREAM	571	A	G	G	0.1026	4	35	-0.9024	1.17757e-08	-
ribose	1471	2L_5826549_SNP	FBgn0085410	TrissinR	INTRON	0	C	T	T	0.1053	4	34	-0.9022	1.28645e-08	-
ribose	1471	2L_7778638_SNP	FBgn0020880	CG7179	UPSTREAM	609	C	T	T	0.1	4	36	-0.8965	1.54392e-08	-
ribose	1471	2L_7778643_SNP	FBgn0020880	CG7179	UPSTREAM	614	G	C	C	0.1	4	36	-0.8965	1.54392e-08	-
ribose	1471	2R_20011753_SNP	FBgn0264299	CG43777	NON_SYNONYMOUS_CODING	0	C	T	T	0.1	4	36	-0.8952	1.6606e-08	(TF_binding_site|mE1_TFBS_cad|FBsf0000247421);(TF_binding_site|mE1_TFBS_chinmo|FBsf0000211997)
ribose	1471	2R_20011753_SNP	FBgn0264298	CG43776	UTR_3_PRIME	0	C	T	T	0.1	4	36	-0.8952	1.6606e-08	(TF_binding_site|mE1_TFBS_cad|FBsf0000247421);(TF_binding_site|mE1_TFBS_chinmo|FBsf0000211997)
ribose	1471	2R_20011753_SNP	FBgn0264297	CG43775	UTR_3_PRIME	0	C	T	T	0.1	4	36	-0.8952	1.6606e-08	(TF_binding_site|mE1_TFBS_cad|FBsf0000247421);(TF_binding_site|mE1_TFBS_chinmo|FBsf0000211997)
ribose	1471	2R_20011753_SNP	FBgn0034978	CG3257	DOWNSTREAM	967	C	T	T	0.1	4	36	-0.8952	1.6606e-08	(TF_binding_site|mE1_TFBS_cad|FBsf0000247421);(TF_binding_site|mE1_TFBS_chinmo|FBsf0000211997)
ribose	1471	2L_16956476_SNP	Intergenic	Intergenic	Intergenic		T	G	G	0.1026	4	35	-0.889	2.53438e-08	(TF_binding_site|mE1_TFBS_HSA|FBsf0000351790);(TF_binding_site|mE1_TFBS_sbb|FBsf0000249975)
ribose 1-phosphate	1763	2L_6759861_SNP	FBgn0031857	CG11321	UTR_3_PRIME	0	A	G	G	0.1026	4	35	-0.1934	1.09137e-08	-
ribose 1-phosphate	1763	2L_6759861_SNP	FBgn0031856	CG11322	UPSTREAM	233	A	G	G	0.1026	4	35	-0.1934	1.09137e-08	-
ribose 1-phosphate	1763	3R_14706632_SNP	Intergenic	Intergenic	Intergenic		A	C	C	0.1	4	36	-0.1927	1.19718e-08	-
ribose 1-phosphate	1763	3L_6869088_SNP	Intergenic	Intergenic	Intergenic		C	T	T	0.125	5	35	-0.1712	3.00473e-08	-
ribose 1-phosphate	1763	3L_6869613_SNP	Intergenic	Intergenic	Intergenic		G	T	T	0.125	5	35	-0.1712	3.00473e-08	-
ribose 1-phosphate	1763	3L_6869692_SNP	Intergenic	Intergenic	Intergenic		A	T	T	0.125	5	35	-0.1712	3.00473e-08	-
ribose 1-phosphate	1763	3L_6869694_SNP	Intergenic	Intergenic	Intergenic		T	C	C	0.125	5	35	-0.1712	3.00473e-08	-
sedoheptulose	53237	2R_12656974_SNP	FBgn0267002	unc-104	INTRON	0	C	A	A	0.3333	13	26	0.3154	3.50225e-09	(TF_binding_site|mE1_TFBS_HSA|FBsf0000357538);(TF_binding_site|mE1_TFBS_inv|FBsf0000236664)
sedoheptulose	53237	2R_12656974_SNP	FBgn0034156	CG5348	DOWNSTREAM	231	C	A	A	0.3333	13	26	0.3154	3.50225e-09	(TF_binding_site|mE1_TFBS_HSA|FBsf0000357538);(TF_binding_site|mE1_TFBS_inv|FBsf0000236664)
sedoheptulose	53237	3L_9490827_SNP	FBgn0036007	path	INTRON	0	G	C	C	0.2821	11	28	0.3267	1.04349e-08	-
stachydrine	34384	2R_13594975_SNP	FBgn0028494	CG6424	SYNONYMOUS_CODING	0	C	T	T	0.125	5	35	-1.161	3.9239e-11	(TF_binding_site|mE1_TFBS_cad|FBsf0000246892);(TF_binding_site|mE1_TFBS_chinmo|FBsf0000211491);(TF_binding_site|mE1_TFBS_HSA|FBsf0000357837)
stachydrine	34384	2L_7824653_SNP	FBgn0027515	CG7115	SYNONYMOUS_CODING	0	C	T	T	0.1026	4	35	-1.255	2.0638e-10	-
stachydrine	34384	2L_7824653_SNP	FBgn0020618	Rack1	DOWNSTREAM	694	C	T	T	0.1026	4	35	-1.255	2.0638e-10	-
stachydrine	34384	3R_13492866_SNP	FBgn0038532	CG14322	INTRON	0	G	T	G	0.1026	4	35	-1.255	2.0875e-10	(TF_binding_site|BDTNP1_TFBS_da|FBsf0000329666);(TF_binding_site|BDTNP1_TFBS_dl|FBsf0000312452);(TF_binding_site|BDTNP1_TFBS_Med|FBsf0000285752);(TF_binding_site|BDTNP1_TFBS_twi|FBsf0000265337);(TF_binding_site|mE1_TFBS_Trl|FBsf0000341272)
stachydrine	34384	3R_13492866_SNP	FBgn0266405	CR45045	UPSTREAM	433	G	T	G	0.1026	4	35	-1.255	2.0875e-10	(TF_binding_site|BDTNP1_TFBS_da|FBsf0000329666);(TF_binding_site|BDTNP1_TFBS_dl|FBsf0000312452);(TF_binding_site|BDTNP1_TFBS_Med|FBsf0000285752);(TF_binding_site|BDTNP1_TFBS_twi|FBsf0000265337);(TF_binding_site|mE1_TFBS_Trl|FBsf0000341272)
stachydrine	34384	2L_7822110_SNP	FBgn0027515	CG7115	INTRON	0	A	T	T	0.1	4	36	-1.253	2.1592e-10	(TF_binding_site|BDTNP1_TFBS_dl|FBsf0000297362);(TF_binding_site|BDTNP1_TFBS_twi|FBsf0000201172);(TF_binding_site|mE1_TFBS_HSA|FBsf0000346549)
stachydrine	34384	2L_7822110_SNP	FBgn0266360	CR45008	UPSTREAM	767	A	T	T	0.1	4	36	-1.253	2.1592e-10	(TF_binding_site|BDTNP1_TFBS_dl|FBsf0000297362);(TF_binding_site|BDTNP1_TFBS_twi|FBsf0000201172);(TF_binding_site|mE1_TFBS_HSA|FBsf0000346549)
stachydrine	34384	3R_10167737_SNP	FBgn0024321	NK7.1	INTRON	0	T	C	C	0.1351	5	32	-1.111	1.4197e-09	-
stachydrine	34384	2R_12586281_SNP	FBgn0050463	CG30463	INTRON	0	T	A	A	0.125	5	35	-1.054	2.11833e-08	(TF_binding_site|mE1_TFBS_HSA|FBsf0000357520);(TF_binding_site|mE1_TFBS_sbb|FBsf0000251299)
stachydrine	34384	3R_24964529_SNP	FBgn0039640	CG14516	INTRON	0	A	C	C	0.1053	4	34	-1.159	2.78288e-08	(TF_binding_site|BDTNP1_TFBS_dl|FBsf0000314510);(TF_binding_site|mE1_TFBS_D|FBsf0000240280);(TF_binding_site|mE1_TFBS_hkb|FBsf0000255867);(TF_binding_site|mE1_TFBS_HSA|FBsf0000376222);(TF_binding_site|mE1_TFBS_jumu|FBsf0000254705);(TF_binding_site|mE1_TFBS_Ubx|FBsf0000262896)
stachydrine	34384	3R_24964529_SNP	FBgn0039639	CG14512	UPSTREAM	234	A	C	C	0.1053	4	34	-1.159	2.78288e-08	(TF_binding_site|BDTNP1_TFBS_dl|FBsf0000314510);(TF_binding_site|mE1_TFBS_D|FBsf0000240280);(TF_binding_site|mE1_TFBS_hkb|FBsf0000255867);(TF_binding_site|mE1_TFBS_HSA|FBsf0000376222);(TF_binding_site|mE1_TFBS_jumu|FBsf0000254705);(TF_binding_site|mE1_TFBS_Ubx|FBsf0000262896)
stachydrine	34384	3R_24964529_SNP	FBgn0028671	Vha100-1	DOWNSTREAM	827	A	C	C	0.1053	4	34	-1.159	2.78288e-08	(TF_binding_site|BDTNP1_TFBS_dl|FBsf0000314510);(TF_binding_site|mE1_TFBS_D|FBsf0000240280);(TF_binding_site|mE1_TFBS_hkb|FBsf0000255867);(TF_binding_site|mE1_TFBS_HSA|FBsf0000376222);(TF_binding_site|mE1_TFBS_jumu|FBsf0000254705);(TF_binding_site|mE1_TFBS_Ubx|FBsf0000262896)
stachydrine	34384	3R_24965319_SNP	FBgn0039640	CG14516	INTRON	0	T	G	G	0.2	8	32	-0.8652	2.97106e-08	(TF_binding_site|BDTNP1_TFBS_dl|FBsf0000314511)
tetradecanedioate	35669	2L_2528890_SNP	Intergenic	Intergenic	Intergenic		G	T	T	0.1	4	36	-0.807	2.7764e-11	-
tetradecanedioate	35669	3R_19570926_SNP	FBgn0263782	Hmgcr	INTRON	0	T	A	A	0.1053	4	34	-0.8111	3.7451e-11	-
tetradecanedioate	35669	X_1705080_SNP	FBgn0261548	CG42666	INTRON	0	A	G	G	0.1053	4	34	-0.7991	1.2582e-10	(TF_binding_site|BDTNP1_TFBS_sna|FBsf0000269791);(TF_binding_site|mE1_TFBS_chinmo|FBsf0000208104);(TF_binding_site|mE1_TFBS_HSA|FBsf0000378250)
tetradecanedioate	35669	2R_17434724_SNP	FBgn0003731	Egfr	INTRON	0	C	T	T	0.1282	5	34	-0.7155	2.119e-10	(TF_binding_site|BDTNP1_TFBS_da|FBsf0000325042);(TF_binding_site|BDTNP1_TFBS_dl|FBsf0000303737);(TF_binding_site|BDTNP1_TFBS_Med|FBsf0000281174);(TF_binding_site|BDTNP1_TFBS_sna|FBsf0000267997);(TF_binding_site|BDTNP1_TFBS_twi|FBsf0000200066);(TF_binding_site|mE1_TFBS_HSA|FBsf0000359110)
tetradecanedioate	35669	X_19587554_SNP	FBgn0086384	Mer	UPSTREAM	21	G	A	A	0.1026	4	35	-0.7581	2.63407e-09	(TF_binding_site|BDTNP1_TFBS_Med|FBsf0000289188);(TF_binding_site|mE1_TFBS_D|FBsf0000238937);(TF_binding_site|mE1_TFBS_GATAe|FBsf0000259061);(TF_binding_site|mE1_TFBS_HSA|FBsf0000349694);(TF_binding_site|mE1_TFBS_kn|FBsf0000336884);(TF_binding_site|mE1_TFBS_Ubx|FBsf0000262244)
tetradecanedioate	35669	X_19587554_SNP	FBgn0031059	CG14229	DOWNSTREAM	456	G	A	A	0.1026	4	35	-0.7581	2.63407e-09	(TF_binding_site|BDTNP1_TFBS_Med|FBsf0000289188);(TF_binding_site|mE1_TFBS_D|FBsf0000238937);(TF_binding_site|mE1_TFBS_GATAe|FBsf0000259061);(TF_binding_site|mE1_TFBS_HSA|FBsf0000349694);(TF_binding_site|mE1_TFBS_kn|FBsf0000336884);(TF_binding_site|mE1_TFBS_Ubx|FBsf0000262244)
thiamin (Vitamin B1)	5341	3L_15488277_SNP	FBgn0040805	CG12355	INTRON	0	T	C	C	0.3056	11	25	-0.2795	6.70772e-09	(TF_binding_site|mE1_TFBS_Trl|FBsf0000340049)
thiamin (Vitamin B1)	5341	3L_11094575_SNP	FBgn0036128	Elo68beta	INTRON	0	G	A	A	0.3158	12	26	-0.2674	1.06201e-08	(TF_binding_site|mE1_TFBS_HSA|FBsf0000364113);(TF_binding_site|mE1_TFBS_inv|FBsf0000235934);(TF_binding_site|mE1_TFBS_sens|FBsf0000223881)
thiamin (Vitamin B1)	5341	3L_11094575_SNP	FBgn0052072	Elo68alpha	DOWNSTREAM	400	G	A	A	0.3158	12	26	-0.2674	1.06201e-08	(TF_binding_site|mE1_TFBS_HSA|FBsf0000364113);(TF_binding_site|mE1_TFBS_inv|FBsf0000235934);(TF_binding_site|mE1_TFBS_sens|FBsf0000223881)
thiamin (Vitamin B1)	5341	3L_11094575_SNP	FBgn0261112	APP-BP1	DOWNSTREAM	897	G	A	A	0.3158	12	26	-0.2674	1.06201e-08	(TF_binding_site|mE1_TFBS_HSA|FBsf0000364113);(TF_binding_site|mE1_TFBS_inv|FBsf0000235934);(TF_binding_site|mE1_TFBS_sens|FBsf0000223881)
thiamin (Vitamin B1)	5341	2L_18483339_SNP	FBgn0032681	CG10283	INTRON	0	G	T	T	0.2432	9	28	-0.2916	2.16847e-08	(TF_binding_site|BDTNP1_TFBS_da|FBsf0000322774);(TF_binding_site|BDTNP1_TFBS_dl|FBsf0000299185)
tricarballylate	15729	3R_10831987_SNP	Intergenic	Intergenic	Intergenic		C	T	T	0.1429	5	30	-2.037	1.46387e-08	-
tricarballylate	15729	2L_9624328_SNP	FBgn0051882	CG31882	DOWNSTREAM	124	C	A	A	0.1	4	36	-2.199	2.10689e-08	-
tyrosine	1299	2R_17399706_SNP	FBgn0043070	MESK2	INTRON	0	T	C	C	0.1282	5	34	-0.6806	7.84177e-09	(TF_binding_site|mE1_TFBS_cad|FBsf0000247188);(TF_binding_site|mE1_TFBS_HSA|FBsf0000359093)
tyrosine	1299	X_22037716_SNP	Intergenic	Intergenic	Intergenic		T	C	C	0.1026	4	35	-0.7353	2.816e-08	(transposable_element|FlyBase|FBti0061195)
valylglutamine	42079	2L_10557400_SNP	FBgn0051721	Trim9	INTRON	0	A	G	A	0.125	5	35	-2.65	2.1708e-11	(TF_binding_site|mE1_TFBS_inv|FBsf0000234840)
valylglutamine	42079	2R_19426870_SNP	FBgn0050181	ppk3	INTRON	0	T	G	G	0.1026	4	35	-2.886	6.9098e-11	(TF_binding_site|BDTNP1_TFBS_da|FBsf0000325250);(TF_binding_site|mE1_TFBS_cad|FBsf0000247349);(TF_binding_site|mE1_TFBS_chinmo|FBsf0000211907);(TF_binding_site|mE1_TFBS_HSA|FBsf0000359815)
valylglutamine	42079	2R_19426870_SNP	FBgn0000241	bw	UPSTREAM	848	T	G	G	0.1026	4	35	-2.886	6.9098e-11	(TF_binding_site|BDTNP1_TFBS_da|FBsf0000325250);(TF_binding_site|mE1_TFBS_cad|FBsf0000247349);(TF_binding_site|mE1_TFBS_chinmo|FBsf0000211907);(TF_binding_site|mE1_TFBS_HSA|FBsf0000359815)
valylglutamine	42079	2R_19428955_SNP	FBgn0041233	Gr59e	INTRON	0	G	A	A	0.1	4	36	-2.87	9.5126e-11	(TF_binding_site|mE1_TFBS_cad|FBsf0000247349)
valylglutamine	42079	2R_19428955_SNP	FBgn0050181	ppk3	UPSTREAM	659	G	A	A	0.1	4	36	-2.87	9.5126e-11	(TF_binding_site|mE1_TFBS_cad|FBsf0000247349)
valylglutamine	42079	2R_19428958_SNP	FBgn0041233	Gr59e	INTRON	0	G	A	A	0.1	4	36	-2.87	9.5126e-11	(TF_binding_site|mE1_TFBS_cad|FBsf0000247349)
valylglutamine	42079	2R_19428958_SNP	FBgn0050181	ppk3	UPSTREAM	662	G	A	A	0.1	4	36	-2.87	9.5126e-11	(TF_binding_site|mE1_TFBS_cad|FBsf0000247349)
valylglutamine	42079	2R_17671195_SNP	Intergenic	Intergenic	Intergenic		A	T	T	0.1351	5	32	-2.537	9.4826e-10	-
valylglutamine	42079	2R_17671196_SNP	Intergenic	Intergenic	Intergenic		A	T	T	0.1351	5	32	-2.537	9.4826e-10	-
valylglutamine	42079	X_20507466_SNP	Intergenic	Intergenic	Intergenic		A	G	G	0.1515	5	28	-2.479	6.81591e-09	-
valylglutamine	42079	2L_7851808_SNP	FBgn0031955	CG14535	INTRON	0	C	T	T	0.1579	6	32	-2.257	9.77466e-09	-
valylglutamine	42079	2R_16304872_DEL	Intergenic	Intergenic	Intergenic		TGTCGCCTGTG	C	TGTCGCCTGTG	0.125	5	35	-2.421	1.07458e-08	-
valylglutamine	42079	2L_7864088_SNP	FBgn0045038	Proc	DOWNSTREAM	554	T	A	A	0.1795	7	32	-2.073	2.86878e-08	-
valylglycine	40475	X_12629360_SNP	FBgn0265523	Smr	INTRON	0	T	C	C	0.1026	4	35	-1.73	8.02904e-09	(TF_binding_site|BDTNP1_TFBS_da|FBsf0000332489);(TF_binding_site|BDTNP1_TFBS_dl|FBsf0000318667);(TF_binding_site|BDTNP1_TFBS_gt|FBsf0000294903);(TF_binding_site|BDTNP1_TFBS_hb|FBsf0000291981);(TF_binding_site|BDTNP1_TFBS_Med|FBsf0000288542);(TF_binding_site|BDTNP1_TFBS_prd|FBsf0000276066);(TF_binding_site|BDTNP1_TFBS_slp1|FBsf0000273513);(TF_binding_site|BDTNP1_TFBS_sna|FBsf0000270245);(TF_bindin…
valylglycine	40475	3L_6709099_SNP	FBgn0005626	ple	INTRON	0	G	A	A	0.1053	4	34	-1.732	8.18845e-09	(TF_binding_site|mE1_TFBS_chinmo|FBsf0000209872)
valylglycine	40475	3R_20941792_SNP	FBgn0051108	CG31108	INTRON	0	A	G	G	0.1081	4	33	-1.722	1.19783e-08	-
valylglycine	40475	3R_2114642_SNP	FBgn0037421	CG15594	INTRON	0	T	C	C	0.1081	4	33	-1.694	2.82198e-08	-
valylleucine	39994	2L_10557400_SNP	FBgn0051721	Trim9	INTRON	0	A	G	A	0.125	5	35	-3.372	1.0586e-10	(TF_binding_site|mE1_TFBS_inv|FBsf0000234840)
valylleucine	39994	2R_19426870_SNP	FBgn0050181	ppk3	INTRON	0	T	G	G	0.1026	4	35	-3.69	2.0865e-10	(TF_binding_site|BDTNP1_TFBS_da|FBsf0000325250);(TF_binding_site|mE1_TFBS_cad|FBsf0000247349);(TF_binding_site|mE1_TFBS_chinmo|FBsf0000211907);(TF_binding_site|mE1_TFBS_HSA|FBsf0000359815)
valylleucine	39994	2R_19426870_SNP	FBgn0000241	bw	UPSTREAM	848	T	G	G	0.1026	4	35	-3.69	2.0865e-10	(TF_binding_site|BDTNP1_TFBS_da|FBsf0000325250);(TF_binding_site|mE1_TFBS_cad|FBsf0000247349);(TF_binding_site|mE1_TFBS_chinmo|FBsf0000211907);(TF_binding_site|mE1_TFBS_HSA|FBsf0000359815)
valylleucine	39994	2R_19428955_SNP	FBgn0041233	Gr59e	INTRON	0	G	A	A	0.1	4	36	-3.675	2.5296e-10	(TF_binding_site|mE1_TFBS_cad|FBsf0000247349)
valylleucine	39994	2R_19428955_SNP	FBgn0050181	ppk3	UPSTREAM	659	G	A	A	0.1	4	36	-3.675	2.5296e-10	(TF_binding_site|mE1_TFBS_cad|FBsf0000247349)
valylleucine	39994	2R_19428958_SNP	FBgn0041233	Gr59e	INTRON	0	G	A	A	0.1	4	36	-3.675	2.5296e-10	(TF_binding_site|mE1_TFBS_cad|FBsf0000247349)
valylleucine	39994	2R_19428958_SNP	FBgn0050181	ppk3	UPSTREAM	662	G	A	A	0.1	4	36	-3.675	2.5296e-10	(TF_binding_site|mE1_TFBS_cad|FBsf0000247349)
valylleucine	39994	2R_17671195_SNP	Intergenic	Intergenic	Intergenic		A	T	T	0.1351	5	32	-3.308	6.5266e-10	-
valylleucine	39994	2R_17671196_SNP	Intergenic	Intergenic	Intergenic		A	T	T	0.1351	5	32	-3.308	6.5266e-10	-
valylleucine	39994	2L_7864088_SNP	FBgn0045038	Proc	DOWNSTREAM	554	T	A	A	0.1795	7	32	-2.739	1.10561e-08	-
valylleucine	39994	X_20507466_SNP	Intergenic	Intergenic	Intergenic		A	G	G	0.1515	5	28	-3.178	1.29436e-08	-
valylleucine	39994	2L_7851808_SNP	FBgn0031955	CG14535	INTRON	0	C	T	T	0.1579	6	32	-2.866	2.91799e-08	-

## Sheet: B. Males
Metabolite	Metabolite ID	SNP ID	Flybase ID	Gene Symbol	SNP Location	Position	Minor Allele	Major Allele	Ref Allele	MAF	Minor Allele Count	Major Allele Count	Effect Size	P-value	Regulation Annotation
1-(1-enyl-stearoyl)-2-oleoyl-GPE (P-18:0/18:1)	52614	3R_19147525_SNP	FBgn0003118	pnt	INTRON	0	A	G	G	0.125	5	35	-0.1893	5.03007e-09	(TF_binding_site|BDTNP1_TFBS_dl|FBsf0000313607);(TF_binding_site|mE1_TFBS_HSA|FBsf0000374437);(TF_binding_site|mE1_TFBS_HSA|FBsf0000374438)
1-(1-enyl-stearoyl)-2-oleoyl-GPE (P-18:0/18:1)	52614	X_14303860_SNP	FBgn0052600	dpr8	INTRON	0	T	A	T	0.1	4	36	-0.2046	1.51693e-08	-
1-(1-enyl-stearoyl)-2-oleoyl-GPE (P-18:0/18:1)	52614	2R_17652440_DEL	FBgn0264716	CR43984	DOWNSTREAM	60	G	GG	GG	0.1026	4	35	-0.2032	2.33346e-08	(TF_binding_site|BDTNP1_TFBS_dl|FBsf0000303806)
1-(1-enyl-stearoyl)-2-oleoyl-GPE (P-18:0/18:1)	52614	2R_17652440_DEL	FBgn0264714	CG43982	DOWNSTREAM	241	G	GG	GG	0.1026	4	35	-0.2032	2.33346e-08	(TF_binding_site|BDTNP1_TFBS_dl|FBsf0000303806)
1-(1-enyl-stearoyl)-2-oleoyl-GPE (P-18:0/18:1)	52614	2R_17652440_DEL	FBgn0050395	CG30395	UPSTREAM	553	G	GG	GG	0.1026	4	35	-0.2032	2.33346e-08	(TF_binding_site|BDTNP1_TFBS_dl|FBsf0000303806)
1-(1-enyl-stearoyl)-2-oleoyl-GPE (P-18:0/18:1)	52614	2R_17652440_DEL	FBgn0264715	CR43983	UPSTREAM	942	G	GG	GG	0.1026	4	35	-0.2032	2.33346e-08	(TF_binding_site|BDTNP1_TFBS_dl|FBsf0000303806)
1-(1-enyl-stearoyl)-2-oleoyl-GPE (P-18:0/18:1)	52614	2R_17652464_SNP	FBgn0264716	CR43984	DOWNSTREAM	37	C	T	T	0.1026	4	35	-0.2032	2.33346e-08	(TF_binding_site|BDTNP1_TFBS_dl|FBsf0000303806)
1-(1-enyl-stearoyl)-2-oleoyl-GPE (P-18:0/18:1)	52614	2R_17652464_SNP	FBgn0264714	CG43982	DOWNSTREAM	264	C	T	T	0.1026	4	35	-0.2032	2.33346e-08	(TF_binding_site|BDTNP1_TFBS_dl|FBsf0000303806)
1-(1-enyl-stearoyl)-2-oleoyl-GPE (P-18:0/18:1)	52614	2R_17652464_SNP	FBgn0050395	CG30395	UPSTREAM	530	C	T	T	0.1026	4	35	-0.2032	2.33346e-08	(TF_binding_site|BDTNP1_TFBS_dl|FBsf0000303806)
1-(1-enyl-stearoyl)-2-oleoyl-GPE (P-18:0/18:1)	52614	2R_17652464_SNP	FBgn0264715	CR43983	UPSTREAM	965	C	T	T	0.1026	4	35	-0.2032	2.33346e-08	(TF_binding_site|BDTNP1_TFBS_dl|FBsf0000303806)
1,2-dipalmitoleoyl-GPC (16:1/16:1)*	52472	X_13512717_SNP	FBgn0030503	Tango2	SYNONYMOUS_CODING	0	T	C	T	0.125	5	35	-0.13	5.6615e-10	-
1,2-dipalmitoleoyl-GPC (16:1/16:1)*	52472	X_13512717_SNP	FBgn0030504	CG2691	DOWNSTREAM	592	T	C	T	0.125	5	35	-0.13	5.6615e-10	-
1,2-dipalmitoleoyl-GPC (16:1/16:1)*	52472	X_13512729_SNP	FBgn0030503	Tango2	SYNONYMOUS_CODING	0	G	A	G	0.125	5	35	-0.13	5.6615e-10	-
1,2-dipalmitoleoyl-GPC (16:1/16:1)*	52472	X_13512729_SNP	FBgn0030504	CG2691	DOWNSTREAM	580	G	A	G	0.125	5	35	-0.13	5.6615e-10	-
1,2-dipalmitoleoyl-GPC (16:1/16:1)*	52472	X_9646495_SNP	FBgn0020378	Sp1	INTRON	0	C	A	A	0.1538	6	33	-0.1174	4.12383e-09	-
1,2-dipalmitoleoyl-GPC (16:1/16:1)*	52472	3L_7753174_SNP	FBgn0001208	Hn	UPSTREAM	379	T	G	G	0.1	4	36	-0.1374	8.20845e-09	-
1,2-dipalmitoleoyl-GPC (16:1/16:1)*	52472	3L_7753174_SNP	FBgn0052373	CG32373	DOWNSTREAM	951	T	G	G	0.1	4	36	-0.1374	8.20845e-09	-
1,2-dipalmitoleoyl-GPC (16:1/16:1)*	52472	3L_7753354_SNP	FBgn0001208	Hn	UPSTREAM	199	T	C	C	0.1	4	36	-0.1374	8.20845e-09	-
1,2-dipalmitoleoyl-GPC (16:1/16:1)*	52472	3L_8469433_SNP	FBgn0262719	CG43163	SYNONYMOUS_CODING	0	G	T	T	0.1026	4	35	-0.1366	1.17803e-08	(TF_binding_site|mE1_TFBS_cad|FBsf0000244504);(TF_binding_site|mE1_TFBS_chinmo|FBsf0000209973);(TF_binding_site|mE1_TFBS_HSA|FBsf0000363315);(TF_binding_site|mE1_TFBS_HSA|FBsf0000363316);(TF_binding_site|mE1_TFBS_inv|FBsf0000235863)
1,2-dipalmitoleoyl-GPC (16:1/16:1)*	52472	X_3900662_SNP	Intergenic	Intergenic	Intergenic		C	A	A	0.1026	4	35	-0.1366	1.17803e-08	-
1-linoleoyl-GPS (18:2)*	43676	X_12877545_SNP	Intergenic	Intergenic	Intergenic		A	T	T	0.1053	4	34	-0.1204	8.2088e-10	(TF_binding_site|BDTNP1_TFBS_twi|FBsf0000205850);(TF_binding_site|mE1_TFBS_HSA|FBsf0000381998)
1-linoleoyl-GPS (18:2)*	43676	2L_13146321_SNP	FBgn0265088	CR44199	UPSTREAM	315	A	G	G	0.1026	4	35	-0.12	9.5754e-10	-
1-linoleoyl-GPS (18:2)*	43676	2R_17474669_SNP	Intergenic	Intergenic	Intergenic		G	C	C	0.1	4	36	-0.1196	1.06471e-09	(TF_binding_site|mE1_TFBS_cad|FBsf0000247193);(TF_binding_site|mE1_TFBS_chinmo|FBsf0000211719);(TF_binding_site|mE1_TFBS_HSA|FBsf0000359131)
1-linoleoyl-GPS (18:2)*	43676	3L_18474002_SNP	Intergenic	Intergenic	Intergenic		T	G	G	0.1026	4	35	-0.1186	1.4395e-09	-
1-linoleoyl-GPS (18:2)*	43676	2L_482547_SNP	FBgn0003963	ush	INTRON	0	A	G	A	0.1026	4	35	-0.119	1.63069e-09	-
1-linoleoyl-GPS (18:2)*	43676	2R_6011166_INS	FBgn0050011	gem	UPSTREAM	631	G	GCTAAG	G	0.1	4	36	-0.116	3.99726e-09	(TF_binding_site|BDTNP1_TFBS_da|FBsf0000323689);(TF_binding_site|BDTNP1_TFBS_dl|FBsf0000301050);(TF_binding_site|BDTNP1_TFBS_Med|FBsf0000279767);(TF_binding_site|BDTNP1_TFBS_twi|FBsf0000198925);(TF_binding_site|mE1_TFBS_bab1|FBsf0000214207);(TF_binding_site|mE1_TFBS_cad|FBsf0000246244);(TF_binding_site|mE1_TFBS_D|FBsf0000240479);(TF_binding_site|mE1_TFBS_Trl|FBsf0000338239)
1-linoleoyl-GPS (18:2)*	43676	2R_6012424_SNP	FBgn0050011	gem	UPSTREAM	577	G	A	G	0.1	4	36	-0.116	3.99726e-09	(TF_binding_site|BDTNP1_TFBS_da|FBsf0000323690);(TF_binding_site|BDTNP1_TFBS_dl|FBsf0000301051);(TF_binding_site|BDTNP1_TFBS_Med|FBsf0000279768);(TF_binding_site|BDTNP1_TFBS_sna|FBsf0000267593);(TF_binding_site|BDTNP1_TFBS_twi|FBsf0000198925);(TF_binding_site|mE1_TFBS_D|FBsf0000240479);(TF_binding_site|mE1_TFBS_HSA|FBsf0000355178);(TF_binding_site|mE1_TFBS_Trl|FBsf0000338241)
1-linoleoyl-GPS (18:2)*	43676	2R_6012441_SNP	FBgn0050011	gem	START_GAINED	0	A	G	A	0.1	4	36	-0.116	3.99726e-09	(TF_binding_site|BDTNP1_TFBS_da|FBsf0000323690);(TF_binding_site|BDTNP1_TFBS_dl|FBsf0000301051);(TF_binding_site|BDTNP1_TFBS_Med|FBsf0000279768);(TF_binding_site|BDTNP1_TFBS_sna|FBsf0000267593);(TF_binding_site|BDTNP1_TFBS_twi|FBsf0000198925);(TF_binding_site|mE1_TFBS_HSA|FBsf0000355178);(TF_binding_site|mE1_TFBS_sens|FBsf0000227163);(TF_binding_site|mE1_TFBS_Trl|FBsf0000338241)
1-linoleoyl-GPS (18:2)*	43676	2R_7579786_SNP	FBgn0062449	CG13197	INTRON	0	T	A	A	0.1053	4	34	-0.1155	7.24221e-09	-
1-methylhistamine	43831	2R_13684075_SNP	FBgn0028743	Dhit	INTRON	0	C	G	G	0.1026	4	35	-1.34	7.78397e-09	(TF_binding_site|BDTNP1_TFBS_dl|FBsf0000302886);(TF_binding_site|mE1_TFBS_HSA|FBsf0000357881);(TF_binding_site|mE1_TFBS_Trl|FBsf0000338806)
1-methylhistamine	43831	3L_12759724_SNP	FBgn0052113	CG32113	SPLICE_SITE_REGION	0	C	T	T	0.1	4	36	-1.332	1.00203e-08	-
1-methylimidazoleacetate	32350	3L_12715355_SNP	Intergenic	Intergenic	Intergenic		G	A	A	0.1053	4	34	-0.824	7.8289e-10	(TF_binding_site|BDTNP1_TFBS_dl|FBsf0000307114);(TF_binding_site|BDTNP1_TFBS_sna|FBsf0000269347);(TF_binding_site|mE1_TFBS_HSA|FBsf0000364672);(TF_binding_site|mE1_TFBS_HSA|FBsf0000364673)
1-methylimidazoleacetate	32350	2R_6731992_SNP	FBgn0050015	CG30015	INTRON	0	A	G	G	0.125	5	35	-0.7407	1.17727e-09	(TF_binding_site|BDTNP1_TFBS_da|FBsf0000323770);(TF_binding_site|BDTNP1_TFBS_dl|FBsf0000301241);(TF_binding_site|BDTNP1_TFBS_gt|FBsf0000293429);(TF_binding_site|BDTNP1_TFBS_hb|FBsf0000290053);(TF_binding_site|BDTNP1_TFBS_Med|FBsf0000279854);(TF_binding_site|BDTNP1_TFBS_prd|FBsf0000274317);(TF_binding_site|BDTNP1_TFBS_slp1|FBsf0000272077);(TF_binding_site|BDTNP1_TFBS_sna|FBsf0000267620);(TF_bindin…
1-methylimidazoleacetate	32350	2R_6732073_SNP	FBgn0050015	CG30015	INTRON	0	T	A	A	0.125	5	35	-0.7407	1.17727e-09	(TF_binding_site|BDTNP1_TFBS_da|FBsf0000323770);(TF_binding_site|BDTNP1_TFBS_dl|FBsf0000301241);(TF_binding_site|BDTNP1_TFBS_gt|FBsf0000293429);(TF_binding_site|BDTNP1_TFBS_hb|FBsf0000290053);(TF_binding_site|BDTNP1_TFBS_Med|FBsf0000279854);(TF_binding_site|BDTNP1_TFBS_prd|FBsf0000274317);(TF_binding_site|BDTNP1_TFBS_slp1|FBsf0000272077);(TF_binding_site|BDTNP1_TFBS_sna|FBsf0000267620);(TF_bindin…
1-methylimidazoleacetate	32350	2R_6612368_SNP	FBgn0005586	Rab3	SYNONYMOUS_CODING	0	G	A	A	0.1316	5	33	-0.7414	1.41306e-09	-
1-methylimidazoleacetate	32350	2R_6612368_SNP	FBgn0033542	CG12309	UPSTREAM	407	G	A	A	0.1316	5	33	-0.7414	1.41306e-09	-
1-methylimidazoleacetate	32350	2R_16391664_SNP	FBgn0034509	Obp57c	NON_SYNONYMOUS_CODING	0	G	C	C	0.1026	4	35	-0.8092	2.2702e-09	(regulatory_region|REDfly_CRMs|FBsf0000435812);(regulatory_region|REDfly_CRMs|FBsf0000436460)
1-methylimidazoleacetate	32350	2R_16391664_SNP	FBgn0043534	Obp57b	UPSTREAM	92	G	C	C	0.1026	4	35	-0.8092	2.2702e-09	(regulatory_region|REDfly_CRMs|FBsf0000435812);(regulatory_region|REDfly_CRMs|FBsf0000436460)
1-methylimidazoleacetate	32350	2R_16391664_SNP	FBgn0043535	Obp57a	UPSTREAM	991	G	C	C	0.1026	4	35	-0.8092	2.2702e-09	(regulatory_region|REDfly_CRMs|FBsf0000435812);(regulatory_region|REDfly_CRMs|FBsf0000436460)
1-methylimidazoleacetate	32350	2R_14898601_SNP	Intergenic	Intergenic	Intergenic		T	A	A	0.1	4	36	-0.7927	6.97523e-09	-
1-methylimidazoleacetate	32350	2R_15540194_DEL	FBgn0265142	Ir56e	INTRON	0	T	TT	TT	0.1053	4	34	-0.7926	8.20952e-09	-
1-methylimidazoleacetate	32350	2R_15540194_DEL	FBgn0265143	CR44212	EXON	0	T	TT	TT	0.1053	4	34	-0.7926	8.20952e-09	-
1-methylimidazoleacetate	32350	2R_15540194_DEL	FBgn0265144	CR44213	UPSTREAM	606	T	TT	TT	0.1053	4	34	-0.7926	8.20952e-09	-
1-methylimidazoleacetate	32350	3R_19708123_SNP	FBgn0025574	Pli	INTRON	0	A	T	T	0.1026	4	35	-0.7863	1.17153e-08	-
1-methylimidazoleacetate	32350	3R_6549663_SNP	Intergenic	Intergenic	Intergenic		G	T	G	0.1026	4	35	-0.7853	1.26268e-08	-
1-methylimidazoleacetate	32350	3L_24089563_SNP	FBgn0011288	Snap25	INTRON	0	T	G	G	0.1176	4	30	-0.7871	1.73109e-08	-
1-methylimidazoleacetate	32350	2R_15539234_SNP	FBgn0265142	Ir56e	UPSTREAM	566	T	C	C	0.1	4	36	-0.7757	2.21338e-08	-
1-methylimidazoleacetate	32350	2R_15539234_SNP	FBgn0265143	CR44212	DOWNSTREAM	766	T	C	C	0.1	4	36	-0.7757	2.21338e-08	-
1-methylimidazoleacetate	32350	2R_15539800_SNP	FBgn0265142	Ir56e	EXON	0	T	C	C	0.1	4	36	-0.7757	2.21338e-08	-
1-methylimidazoleacetate	32350	2R_15539800_SNP	FBgn0265143	CR44212	DOWNSTREAM	200	T	C	C	0.1	4	36	-0.7757	2.21338e-08	-
1-methylimidazoleacetate	32350	2R_14095273_SNP	FBgn0050114	CG30114	UTR_5_PRIME	0	C	G	G	0.1026	4	35	-0.7749	2.49631e-08	-
1-methylimidazoleacetate	32350	X_12798505_SNP	FBgn0030432	CG4404	SYNONYMOUS_CODING	0	T	C	C	0.1081	4	33	-0.7749	2.87046e-08	(TF_binding_site|mE1_TFBS_chinmo|FBsf0000208828);(TF_binding_site|mE1_TFBS_HSA|FBsf0000381982)
1-methylimidazoleacetate	32350	X_12798505_SNP	FBgn0030431	CG4407	UPSTREAM	956	T	C	C	0.1081	4	33	-0.7749	2.87046e-08	(TF_binding_site|mE1_TFBS_chinmo|FBsf0000208828);(TF_binding_site|mE1_TFBS_HSA|FBsf0000381982)
1-oleoyl-2-linoleoyl-GPC (18:1/18:2)*	52453	3R_19120142_SNP	FBgn0003118	pnt	INTRON	0	G	C	C	0.375	15	25	-0.04813	2.23589e-08	(TF_binding_site|BDTNP1_TFBS_dl|FBsf0000313590);(TF_binding_site|mE1_TFBS_HSA|FBsf0000374424);(TF_binding_site|mE1_TFBS_sens|FBsf0000233111);(TF_binding_site|mE1_TFBS_Trl|FBsf0000341599)
1-palmitoleoyl-3-oleoyl-glycerol (16:1/18:1)*	52631	2L_2790283_SNP	FBgn0004242	Syt1	INTRON	0	C	T	C	0.1579	6	32	-0.142	8.72152e-09	-
1-palmitoleoyl-3-oleoyl-glycerol (16:1/18:1)*	52631	2L_16431797_SNP	FBgn0028523	CG5888	INTRON	0	G	T	T	0.125	5	35	-0.1524	9.64163e-09	-
1-palmitoleoyl-3-oleoyl-glycerol (16:1/18:1)*	52631	3R_26670793_SNP	Intergenic	Intergenic	Intergenic		A	T	T	0.1143	4	31	-0.1687	1.38109e-08	(TF_binding_site|BDTNP1_TFBS_da|FBsf0000330936);(TF_binding_site|BDTNP1_TFBS_dl|FBsf0000314880);(TF_binding_site|BDTNP1_TFBS_hb|FBsf0000292905);(TF_binding_site|BDTNP1_TFBS_Med|FBsf0000287029)
1-palmitoleoyl-3-oleoyl-glycerol (16:1/18:1)*	52631	2L_7996015_SNP	FBgn0266331	CR44996	EXON	0	G	C	C	0.1842	7	31	-0.1324	1.41469e-08	(TF_binding_site|mE1_TFBS_chinmo|FBsf0000207448)
1-palmitoleoyl-3-oleoyl-glycerol (16:1/18:1)*	52631	2L_7996015_SNP	FBgn0031970	CG7227	SYNONYMOUS_CODING	0	G	C	C	0.1842	7	31	-0.1324	1.41469e-08	(TF_binding_site|mE1_TFBS_chinmo|FBsf0000207448)
1-palmitoleoyl-GPC (16:1)*	33230	3R_5534036_SNP	FBgn0037734	trbd	SYNONYMOUS_CODING	0	G	A	A	0.1	4	36	-0.06141	2.87208e-08	(TF_binding_site|mE1_TFBS_chinmo|FBsf0000212412);(TF_binding_site|mE1_TFBS_HSA|FBsf0000370023)
1-palmitoyl-2-linoleoyl-GPE (16:0/18:2)	42449	2L_4165367_SNP	FBgn0026394	Or24a	SYNONYMOUS_CODING	0	G	A	A	0.1026	4	35	-0.1343	2.73361e-09	-
1-palmitoyl-2-linoleoyl-GPI (16:0/18:2)	52450	2L_7625066_SNP	Intergenic	Intergenic	Intergenic		T	A	A	0.1	4	36	-0.08826	7.47636e-09	(TF_binding_site|BDTNP1_TFBS_da|FBsf0000321852);(TF_binding_site|BDTNP1_TFBS_dl|FBsf0000297338);(TF_binding_site|BDTNP1_TFBS_prd|FBsf0000274911);(TF_binding_site|BDTNP1_TFBS_twi|FBsf0000201160);(TF_binding_site|mE1_TFBS_HSA|FBsf0000346500);(TF_binding_site|mE1_TFBS_Kr|FBsf0000253216);(TF_binding_site|mE1_TFBS_sens|FBsf0000216661)
1-palmitoyl-2-linoleoyl-GPI (16:0/18:2)	52450	X_15112180_SNP	Intergenic	Intergenic	Intergenic		A	C	A	0.1	4	36	-0.08826	7.47636e-09	-
1-palmitoyl-2-linoleoyl-GPI (16:0/18:2)	52450	3R_19566699_SNP	FBgn0263782	Hmgcr	INTRON	0	G	C	G	0.1351	5	32	-0.0799	1.03648e-08	-
1-palmitoyl-2-linoleoyl-GPI (16:0/18:2)	52450	2R_16764577_SNP	FBgn0050295	Ipk1	INTRON	0	C	T	C	0.1562	5	27	-0.08055	1.29748e-08	-
1-palmitoyl-2-linoleoyl-GPI (16:0/18:2)	52450	2R_14707399_DEL	FBgn0010551	Phb2	INTRON	0	TGT	T	TGT	0.2432	9	28	-0.06257	2.53812e-08	-
1-palmitoyl-2-palmitoleoyl-GPC (16:0/16:1)*	52470	X_13512717_SNP	FBgn0030503	Tango2	SYNONYMOUS_CODING	0	T	C	T	0.125	5	35	-0.196	1.69552e-09	-
1-palmitoyl-2-palmitoleoyl-GPC (16:0/16:1)*	52470	X_13512717_SNP	FBgn0030504	CG2691	DOWNSTREAM	592	T	C	T	0.125	5	35	-0.196	1.69552e-09	-
1-palmitoyl-2-palmitoleoyl-GPC (16:0/16:1)*	52470	X_13512729_SNP	FBgn0030503	Tango2	SYNONYMOUS_CODING	0	G	A	G	0.125	5	35	-0.196	1.69552e-09	-
1-palmitoyl-2-palmitoleoyl-GPC (16:0/16:1)*	52470	X_13512729_SNP	FBgn0030504	CG2691	DOWNSTREAM	580	G	A	G	0.125	5	35	-0.196	1.69552e-09	-
1-palmitoyl-2-palmitoleoyl-GPC (16:0/16:1)*	52470	3L_7753174_SNP	FBgn0001208	Hn	UPSTREAM	379	T	G	G	0.1	4	36	-0.2061	2.64861e-08	-
1-palmitoyl-2-palmitoleoyl-GPC (16:0/16:1)*	52470	3L_7753174_SNP	FBgn0052373	CG32373	DOWNSTREAM	951	T	G	G	0.1	4	36	-0.2061	2.64861e-08	-
1-palmitoyl-2-palmitoleoyl-GPC (16:0/16:1)*	52470	3L_7753354_SNP	FBgn0001208	Hn	UPSTREAM	199	T	C	C	0.1	4	36	-0.2061	2.64861e-08	-
1-palmitoyl-GPI (16:0)*	35305	3R_13018521_SNP	FBgn0038492	Mur89F	INTRON	0	T	A	A	0.1026	4	35	-0.2815	2.9602e-12	(TF_binding_site|mE1_TFBS_chinmo|FBsf0000212835)
1-palmitoyl-GPI (16:0)*	35305	3R_13018523_SNP	FBgn0038492	Mur89F	INTRON	0	T	C	C	0.1026	4	35	-0.2815	2.9602e-12	(TF_binding_site|mE1_TFBS_chinmo|FBsf0000212835)
1-palmitoyl-GPI (16:0)*	35305	3R_13018532_SNP	FBgn0038492	Mur89F	INTRON	0	C	T	T	0.1026	4	35	-0.2815	2.9602e-12	(TF_binding_site|mE1_TFBS_chinmo|FBsf0000212835)
1-palmitoyl-GPI (16:0)*	35305	2R_6021361_SNP	FBgn0050011	gem	SYNONYMOUS_CODING	0	A	G	A	0.1026	4	35	-0.2811	3.2918e-12	-
1-palmitoyl-GPI (16:0)*	35305	2L_7283616_SNP	Intergenic	Intergenic	Intergenic		C	T	T	0.1471	5	29	-0.2479	5.0084e-11	-
1-palmitoyl-GPI (16:0)*	35305	2L_7280658_SNP	Intergenic	Intergenic	Intergenic		G	C	C	0.1316	5	33	-0.2481	5.8894e-11	-
1-palmitoyl-GPI (16:0)*	35305	3R_19127885_SNP	FBgn0003118	pnt	INTRON	0	T	A	A	0.1026	4	35	-0.2726	7.9176e-11	(TF_binding_site|BDTNP1_TFBS_da|FBsf0000330266);(TF_binding_site|BDTNP1_TFBS_dl|FBsf0000313597);(TF_binding_site|BDTNP1_TFBS_Med|FBsf0000286300);(TF_binding_site|mE1_TFBS_cad|FBsf0000249082);(TF_binding_site|mE1_TFBS_HSA|FBsf0000374428)
1-palmitoyl-GPI (16:0)*	35305	3L_13510715_SNP	FBgn0036377	CG10710	SYNONYMOUS_CODING	0	T	G	T	0.1053	4	34	-0.2722	9.8775e-11	(TF_binding_site|BDTNP1_TFBS_sna|FBsf0000269387);(TF_binding_site|mE1_TFBS_cad|FBsf0000244940);(TF_binding_site|mE1_TFBS_chinmo|FBsf0000210206);(TF_binding_site|mE1_TFBS_HSA|FBsf0000364932)
1-palmitoyl-GPI (16:0)*	35305	2L_7280660_SNP	Intergenic	Intergenic	Intergenic		A	G	G	0.1351	5	32	-0.2465	1.1021e-10	-
1-palmitoyl-GPI (16:0)*	35305	2R_7579786_SNP	FBgn0062449	CG13197	INTRON	0	T	A	A	0.1053	4	34	-0.2717	1.166e-10	-
1-palmitoyl-GPI (16:0)*	35305	2L_13146350_SNP	FBgn0265088	CR44199	UPSTREAM	286	A	G	G	0.1026	4	35	-0.2701	1.6212e-10	-
1-palmitoyl-GPI (16:0)*	35305	2R_7579793_SNP	FBgn0062449	CG13197	INTRON	0	T	A	A	0.1282	5	34	-0.2444	1.7808e-10	-
1-palmitoyl-GPI (16:0)*	35305	2L_12906701_INS	Intergenic	Intergenic	Intergenic		TT	T	T	0.1316	5	33	-0.2436	2.5796e-10	-
1-palmitoyl-GPI (16:0)*	35305	2R_6973327_INS	FBgn0040765	luna	INTRON	0	TGG	T	T	0.1053	4	34	-0.268	3.2267e-10	(TF_binding_site|BDTNP1_TFBS_da|FBsf0000323785);(TF_binding_site|BDTNP1_TFBS_dl|FBsf0000301272);(TF_binding_site|BDTNP1_TFBS_hb|FBsf0000290056);(TF_binding_site|BDTNP1_TFBS_Med|FBsf0000279867);(TF_binding_site|BDTNP1_TFBS_prd|FBsf0000274321);(TF_binding_site|BDTNP1_TFBS_slp1|FBsf0000272079);(TF_binding_site|BDTNP1_TFBS_twi|FBsf0000199008);(TF_binding_site|mE1_TFBS_HSA|FBsf0000355493);(TF_binding_…
1-palmitoyl-GPI (16:0)*	35305	2R_6973327_INS	FBgn0262817	CG43188	UTR_3_PRIME	0	TGG	T	T	0.1053	4	34	-0.268	3.2267e-10	(TF_binding_site|BDTNP1_TFBS_da|FBsf0000323785);(TF_binding_site|BDTNP1_TFBS_dl|FBsf0000301272);(TF_binding_site|BDTNP1_TFBS_hb|FBsf0000290056);(TF_binding_site|BDTNP1_TFBS_Med|FBsf0000279867);(TF_binding_site|BDTNP1_TFBS_prd|FBsf0000274321);(TF_binding_site|BDTNP1_TFBS_slp1|FBsf0000272079);(TF_binding_site|BDTNP1_TFBS_twi|FBsf0000199008);(TF_binding_site|mE1_TFBS_HSA|FBsf0000355493);(TF_binding_…
1-palmitoyl-GPI (16:0)*	35305	2R_6973327_INS	FBgn0262818	CG43189	DOWNSTREAM	422	TGG	T	T	0.1053	4	34	-0.268	3.2267e-10	(TF_binding_site|BDTNP1_TFBS_da|FBsf0000323785);(TF_binding_site|BDTNP1_TFBS_dl|FBsf0000301272);(TF_binding_site|BDTNP1_TFBS_hb|FBsf0000290056);(TF_binding_site|BDTNP1_TFBS_Med|FBsf0000279867);(TF_binding_site|BDTNP1_TFBS_prd|FBsf0000274321);(TF_binding_site|BDTNP1_TFBS_slp1|FBsf0000272079);(TF_binding_site|BDTNP1_TFBS_twi|FBsf0000199008);(TF_binding_site|mE1_TFBS_HSA|FBsf0000355493);(TF_binding_…
1-palmitoyl-GPI (16:0)*	35305	3L_16730306_SNP	FBgn0036659	CG9701	INTRON	0	A	T	T	0.1053	4	34	-0.2667	4.497e-10	(TF_binding_site|mE1_TFBS_cad|FBsf0000245191)
1-palmitoyl-GPI (16:0)*	35305	2L_6018409_SNP	FBgn0001170	H2.0	INTRON	0	A	T	T	0.1	4	36	-0.2606	1.74582e-09	-
1-palmitoyl-GPI (16:0)*	35305	2L_6018410_SNP	FBgn0001170	H2.0	INTRON	0	T	C	C	0.1	4	36	-0.2606	1.74582e-09	-
1-palmitoyl-GPI (16:0)*	35305	2L_7172740_SNP	Intergenic	Intergenic	Intergenic		A	T	A	0.1026	4	35	-0.2597	2.37221e-09	-
1-palmitoyl-GPI (16:0)*	35305	X_9497232_SNP	FBgn0030141	Gga	SYNONYMOUS_CODING	0	A	G	G	0.125	5	35	-0.235	2.50688e-09	(TF_binding_site|mE1_TFBS_chinmo|FBsf0000208647);(TF_binding_site|mE1_TFBS_HSA|FBsf0000380991);(TF_binding_site|mE1_TFBS_sens|FBsf0000220360)
1-palmitoyl-GPI (16:0)*	35305	X_9497232_SNP	FBgn0264691	Lst8	DOWNSTREAM	955	A	G	G	0.125	5	35	-0.235	2.50688e-09	(TF_binding_site|mE1_TFBS_chinmo|FBsf0000208647);(TF_binding_site|mE1_TFBS_HSA|FBsf0000380991);(TF_binding_site|mE1_TFBS_sens|FBsf0000220360)
1-palmitoyl-GPI (16:0)*	35305	3R_23085846_SNP	FBgn0264841	CR44049	EXON	0	A	G	G	0.1316	5	33	-0.234	4.0144e-09	(TF_binding_site|mE1_TFBS_cad|FBsf0000249365);(TF_binding_site|mE1_TFBS_chinmo|FBsf0000213451)
1-palmitoyl-GPI (16:0)*	35305	3R_23085846_SNP	FBgn0010328	woc	SYNONYMOUS_CODING	0	A	G	G	0.1316	5	33	-0.234	4.0144e-09	(TF_binding_site|mE1_TFBS_cad|FBsf0000249365);(TF_binding_site|mE1_TFBS_chinmo|FBsf0000213451)
1-palmitoyl-GPI (16:0)*	35305	3R_8083320_SNP	Intergenic	Intergenic	Intergenic		A	G	G	0.15	6	34	-0.2144	4.10991e-09	(TF_binding_site|BDTNP1_TFBS_da|FBsf0000328993);(TF_binding_site|BDTNP1_TFBS_twi|FBsf0000264809);(TF_binding_site|mE1_TFBS_cad|FBsf0000248190);(TF_binding_site|mE1_TFBS_HSA|FBsf0000370880);(TF_binding_site|mE1_TFBS_Kr|FBsf0000253722)
1-palmitoyl-GPI (16:0)*	35305	3L_11176952_SNP	FBgn0036144	GlcAT-P	UTR_5_PRIME	0	C	T	T	0.125	5	35	-0.2311	5.30678e-09	-
1-palmitoyl-GPI (16:0)*	35305	3L_11863175_SNP	FBgn0266100	CG44837	INTRON	0	A	G	G	0.125	5	35	-0.2311	5.30678e-09	(TF_binding_site|mE1_TFBS_HSA|FBsf0000364374);(TF_binding_site|mE1_TFBS_sbb|FBsf0000250257)
1-palmitoyl-GPI (16:0)*	35305	3L_11863175_SNP	FBgn0036217	CG5906	DOWNSTREAM	382	A	G	G	0.125	5	35	-0.2311	5.30678e-09	(TF_binding_site|mE1_TFBS_HSA|FBsf0000364374);(TF_binding_site|mE1_TFBS_sbb|FBsf0000250257)
1-palmitoyl-GPI (16:0)*	35305	2L_13146321_SNP	FBgn0265088	CR44199	UPSTREAM	315	A	G	G	0.1026	4	35	-0.2553	6.37637e-09	-
1-palmitoyl-GPI (16:0)*	35305	2L_7289465_SNP	Intergenic	Intergenic	Intergenic		G	A	A	0.1538	6	33	-0.2115	6.72719e-09	(TF_binding_site|BDTNP1_TFBS_bcd|FBsf0000333655);(TF_binding_site|BDTNP1_TFBS_da|FBsf0000321792);(TF_binding_site|BDTNP1_TFBS_dl|FBsf0000297256);(TF_binding_site|BDTNP1_TFBS_gt|FBsf0000293090);(TF_binding_site|BDTNP1_TFBS_Med|FBsf0000277870);(TF_binding_site|BDTNP1_TFBS_sna|FBsf0000268461);(TF_binding_site|BDTNP1_TFBS_twi|FBsf0000201124);(TF_binding_site|mE1_TFBS_cad|FBsf0000241604);(TF_binding_s…
1-palmitoyl-GPI (16:0)*	35305	3L_2215388_SNP	Intergenic	Intergenic	Intergenic		A	T	T	0.1	4	36	-0.2533	7.21861e-09	-
1-palmitoyl-GPI (16:0)*	35305	3L_2215391_INS	Intergenic	Intergenic	Intergenic		AAAGTTAAGCATAAGTAAAGTTA	A	A	0.1	4	36	-0.2533	7.21861e-09	-
1-palmitoyl-GPI (16:0)*	35305	X_12877545_SNP	Intergenic	Intergenic	Intergenic		A	T	T	0.1053	4	34	-0.2541	9.034e-09	(TF_binding_site|BDTNP1_TFBS_twi|FBsf0000205850);(TF_binding_site|mE1_TFBS_HSA|FBsf0000381998)
1-palmitoyl-GPI (16:0)*	35305	2R_17474669_SNP	Intergenic	Intergenic	Intergenic		G	C	C	0.1	4	36	-0.2529	9.917e-09	(TF_binding_site|mE1_TFBS_cad|FBsf0000247193);(TF_binding_site|mE1_TFBS_chinmo|FBsf0000211719);(TF_binding_site|mE1_TFBS_HSA|FBsf0000359131)
1-palmitoyl-GPI (16:0)*	35305	2R_6011166_INS	FBgn0050011	gem	UPSTREAM	631	G	GCTAAG	G	0.1	4	36	-0.2525	1.00727e-08	(TF_binding_site|BDTNP1_TFBS_da|FBsf0000323689);(TF_binding_site|BDTNP1_TFBS_dl|FBsf0000301050);(TF_binding_site|BDTNP1_TFBS_Med|FBsf0000279767);(TF_binding_site|BDTNP1_TFBS_twi|FBsf0000198925);(TF_binding_site|mE1_TFBS_bab1|FBsf0000214207);(TF_binding_site|mE1_TFBS_cad|FBsf0000246244);(TF_binding_site|mE1_TFBS_D|FBsf0000240479);(TF_binding_site|mE1_TFBS_Trl|FBsf0000338239)
1-palmitoyl-GPI (16:0)*	35305	2R_6012424_SNP	FBgn0050011	gem	UPSTREAM	577	G	A	G	0.1	4	36	-0.2525	1.00727e-08	(TF_binding_site|BDTNP1_TFBS_da|FBsf0000323690);(TF_binding_site|BDTNP1_TFBS_dl|FBsf0000301051);(TF_binding_site|BDTNP1_TFBS_Med|FBsf0000279768);(TF_binding_site|BDTNP1_TFBS_sna|FBsf0000267593);(TF_binding_site|BDTNP1_TFBS_twi|FBsf0000198925);(TF_binding_site|mE1_TFBS_D|FBsf0000240479);(TF_binding_site|mE1_TFBS_HSA|FBsf0000355178);(TF_binding_site|mE1_TFBS_Trl|FBsf0000338241)
1-palmitoyl-GPI (16:0)*	35305	2R_6012441_SNP	FBgn0050011	gem	START_GAINED	0	A	G	A	0.1	4	36	-0.2525	1.00727e-08	(TF_binding_site|BDTNP1_TFBS_da|FBsf0000323690);(TF_binding_site|BDTNP1_TFBS_dl|FBsf0000301051);(TF_binding_site|BDTNP1_TFBS_Med|FBsf0000279768);(TF_binding_site|BDTNP1_TFBS_sna|FBsf0000267593);(TF_binding_site|BDTNP1_TFBS_twi|FBsf0000198925);(TF_binding_site|mE1_TFBS_HSA|FBsf0000355178);(TF_binding_site|mE1_TFBS_sens|FBsf0000227163);(TF_binding_site|mE1_TFBS_Trl|FBsf0000338241)
1-palmitoyl-GPI (16:0)*	35305	3L_11863439_SNP	FBgn0266100	CG44837	INTRON	0	C	T	T	0.1316	5	33	-0.2281	1.24896e-08	(TF_binding_site|mE1_TFBS_sbb|FBsf0000250257)
1-palmitoyl-GPI (16:0)*	35305	3L_11863439_SNP	FBgn0036217	CG5906	DOWNSTREAM	118	C	T	T	0.1316	5	33	-0.2281	1.24896e-08	(TF_binding_site|mE1_TFBS_sbb|FBsf0000250257)
1-palmitoyl-GPI (16:0)*	35305	3R_13018450_SNP	FBgn0038492	Mur89F	INTRON	0	C	T	T	0.1282	5	34	-0.2272	1.31162e-08	-
1-palmitoyl-GPI (16:0)*	35305	3R_13018514_SNP	FBgn0038492	Mur89F	INTRON	0	G	T	T	0.1282	5	34	-0.2272	1.31162e-08	(TF_binding_site|mE1_TFBS_chinmo|FBsf0000212835)
1-palmitoyl-GPI (16:0)*	35305	2L_7282863_SNP	Intergenic	Intergenic	Intergenic		G	C	C	0.1579	6	32	-0.2119	1.34827e-08	-
1-palmitoyl-GPI (16:0)*	35305	2L_7282887_SNP	Intergenic	Intergenic	Intergenic		G	T	T	0.1579	6	32	-0.2119	1.34827e-08	-
1-palmitoyl-GPI (16:0)*	35305	2L_482547_SNP	FBgn0003963	ush	INTRON	0	A	G	A	0.1026	4	35	-0.2514	1.47513e-08	-
1-palmitoyl-GPI (16:0)*	35305	3R_7129280_SNP	FBgn0051386	CR31386	INTRON	0	T	C	C	0.1	4	36	-0.2502	1.51059e-08	(TF_binding_site|BDTNP1_TFBS_da|FBsf0000328886);(TF_binding_site|BDTNP1_TFBS_dl|FBsf0000311087);(TF_binding_site|BDTNP1_TFBS_hb|FBsf0000292402);(TF_binding_site|BDTNP1_TFBS_Med|FBsf0000285010);(TF_binding_site|BDTNP1_TFBS_prd|FBsf0000276437);(TF_binding_site|BDTNP1_TFBS_twi|FBsf0000264717);(TF_binding_site|mE1_TFBS_HSA|FBsf0000370551);(TF_binding_site|mE1_TFBS_Trl|FBsf0000340882)
1-palmitoyl-GPI (16:0)*	35305	2R_6810847_SNP	Intergenic	Intergenic	Intergenic		A	G	G	0.1	4	36	-0.2501	1.77229e-08	-
1-palmitoyl-GPI (16:0)*	35305	3L_2343161_SNP	FBgn0035331	MsR1	SYNONYMOUS_CODING	0	G	C	C	0.1	4	36	-0.2501	1.77229e-08	-
1-palmitoyl-GPI (16:0)*	35305	3L_18474002_SNP	Intergenic	Intergenic	Intergenic		T	G	G	0.1026	4	35	-0.2496	2.08461e-08	-
1-palmitoyl-GPI (16:0)*	35305	3L_17956812_SNP	FBgn0000568	Eip75B	INTRON	0	G	T	T	0.1667	6	30	-0.2116	2.08833e-08	-
1-palmitoyl-GPI (16:0)*	35305	3R_23086338_SNP	FBgn0264841	CR44049	EXON	0	C	T	T	0.125	5	35	-0.2254	2.4843e-08	(TF_binding_site|mE1_TFBS_cad|FBsf0000249365);(TF_binding_site|mE1_TFBS_chinmo|FBsf0000213451);(TF_binding_site|mE1_TFBS_HSA|FBsf0000375673);(TF_binding_site|mE1_TFBS_sens|FBsf0000233760)
1-palmitoyl-GPI (16:0)*	35305	3R_23086338_SNP	FBgn0010328	woc	SYNONYMOUS_CODING	0	C	T	T	0.125	5	35	-0.2254	2.4843e-08	(TF_binding_site|mE1_TFBS_cad|FBsf0000249365);(TF_binding_site|mE1_TFBS_chinmo|FBsf0000213451);(TF_binding_site|mE1_TFBS_HSA|FBsf0000375673);(TF_binding_site|mE1_TFBS_sens|FBsf0000233760)
2'-deoxyguanosine	1411	2R_11167188_SNP	FBgn0265194	Trpm	INTRON	0	A	C	C	0.1026	4	35	-0.249	1.11325e-08	-
2-hydroxy-3-methylvalerate	36746	2L_7778600_SNP	FBgn0020880	CG7179	UPSTREAM	571	A	G	G	0.1026	4	35	-0.7127	6.833e-10	-
2-hydroxy-3-methylvalerate	36746	2L_7778638_SNP	FBgn0020880	CG7179	UPSTREAM	609	C	T	T	0.1	4	36	-0.704	1.39293e-09	-
2-hydroxy-3-methylvalerate	36746	2L_7778643_SNP	FBgn0020880	CG7179	UPSTREAM	614	G	C	C	0.1	4	36	-0.704	1.39293e-09	-
2-hydroxy-3-methylvalerate	36746	3L_21939591_SNP	FBgn0037142	CG14562	INTRON	0	G	A	A	0.1351	5	32	-0.6419	1.45993e-09	-
2-hydroxy-3-methylvalerate	36746	3L_18269289_SNP	Intergenic	Intergenic	Intergenic		G	T	T	0.1538	6	33	-0.5662	1.92228e-08	-
2-hydroxy-3-methylvalerate	36746	3L_18269518_SNP	Intergenic	Intergenic	Intergenic		G	A	A	0.1538	6	33	-0.5662	1.92228e-08	-
2-methylserine	53229	3L_6455540_SNP	FBgn0261801	CG42747	INTRON	0	T	A	A	0.1081	4	33	-2.561	3.5472e-11	(TF_binding_site|BDTNP1_TFBS_da|FBsf0000326237);(TF_binding_site|BDTNP1_TFBS_twi|FBsf0000203081)
2-methylserine	53229	2L_19157630_SNP	FBgn0010300	brat	INTRON	0	A	T	T	0.1143	4	31	-2.546	7.3269e-11	(TF_binding_site|BDTNP1_TFBS_da|FBsf0000322887);(TF_binding_site|BDTNP1_TFBS_dl|FBsf0000299369);(TF_binding_site|BDTNP1_TFBS_gt|FBsf0000293300);(TF_binding_site|BDTNP1_TFBS_hb|FBsf0000290919);(TF_binding_site|BDTNP1_TFBS_Med|FBsf0000278951);(TF_binding_site|BDTNP1_TFBS_twi|FBsf0000202123);(TF_binding_site|BDTNP1_TFBS_z|FBsf0000196264);(TF_binding_site|mE1_TFBS_cad|FBsf0000242397);(TF_binding_site…
2-methylserine	53229	2L_19157630_SNP	FBgn0266312	CR44977	DOWNSTREAM	238	A	T	T	0.1143	4	31	-2.546	7.3269e-11	(TF_binding_site|BDTNP1_TFBS_da|FBsf0000322887);(TF_binding_site|BDTNP1_TFBS_dl|FBsf0000299369);(TF_binding_site|BDTNP1_TFBS_gt|FBsf0000293300);(TF_binding_site|BDTNP1_TFBS_hb|FBsf0000290919);(TF_binding_site|BDTNP1_TFBS_Med|FBsf0000278951);(TF_binding_site|BDTNP1_TFBS_twi|FBsf0000202123);(TF_binding_site|BDTNP1_TFBS_z|FBsf0000196264);(TF_binding_site|mE1_TFBS_cad|FBsf0000242397);(TF_binding_site…
2-palmitoyl-GPC (16:0)*	35253	2L_6018409_SNP	FBgn0001170	H2.0	INTRON	0	A	T	T	0.1	4	36	-0.2325	1.57919e-09	-
2-palmitoyl-GPC (16:0)*	35253	2L_6018410_SNP	FBgn0001170	H2.0	INTRON	0	T	C	C	0.1	4	36	-0.2325	1.57919e-09	-
2-palmitoyl-GPC (16:0)*	35253	2L_7172740_SNP	Intergenic	Intergenic	Intergenic		A	T	A	0.1026	4	35	-0.2319	2.03929e-09	-
3-(4-hydroxyphenyl)lactate	32197	X_11534957_SNP	FBgn0004370	Ptp10D	INTRON	0	T	A	A	0.1892	7	30	-1.119	1.1521e-08	(TF_binding_site|BDTNP1_TFBS_dl|FBsf0000318415);(TF_binding_site|mE1_TFBS_HSA|FBsf0000381569)
3-(4-hydroxyphenyl)lactate	32197	2L_5826549_SNP	FBgn0085410	TrissinR	INTRON	0	C	T	T	0.1053	4	34	-1.448	1.83126e-08	-
3-(4-hydroxyphenyl)lactate	32197	3L_5815054_SNP	FBgn0003984	vn	INTRON	0	C	A	C	0.1351	5	32	-1.308	2.67295e-08	-
3-(4-hydroxyphenyl)lactate	32197	3L_5815075_SNP	FBgn0003984	vn	INTRON	0	G	C	G	0.1351	5	32	-1.308	2.67295e-08	-
3-hydroxyoctanoate	22001	3L_22991780_INS	FBgn0262509	nrm	UTR_5_PRIME	0	AT	A	A	0.1351	5	32	-0.6298	9.11259e-09	(TF_binding_site|BDTNP1_TFBS_da|FBsf0000327987);(TF_binding_site|BDTNP1_TFBS_dl|FBsf0000309299);(TF_binding_site|BDTNP1_TFBS_twi|FBsf0000204619);(TF_binding_site|mE1_TFBS_HSA|FBsf0000368049);(TF_binding_site|mE1_TFBS_HSA|FBsf0000368050)
3-hydroxyoctanoate	22001	X_2860065_SNP	FBgn0028369	kirre	INTRON	0	T	C	T	0.1842	7	31	-0.5315	2.79514e-08	-
3-hydroxyoctanoate	22001	X_2860065_SNP	FBgn0003285	rst	UTR_5_PRIME	0	T	C	T	0.1842	7	31	-0.5315	2.79514e-08	-
3-hydroxypalmitate	27503	2L_9133400_SNP	FBgn0052982	CG32982	INTRON	0	T	A	A	0.1026	4	35	-0.5339	2.7138e-10	-
3-hydroxypalmitate	27503	2L_2790283_SNP	FBgn0004242	Syt1	INTRON	0	C	T	C	0.1579	6	32	-0.4699	2.9407e-10	-
3-hydroxypalmitate	27503	3L_2789411_SNP	FBgn0263392	CG43444	SYNONYMOUS_CODING	0	T	C	C	0.2121	7	26	-0.4132	2.37655e-09	(TF_binding_site|BDTNP1_TFBS_sna|FBsf0000269054);(TF_binding_site|mE1_TFBS_cad|FBsf0000244089);(TF_binding_site|mE1_TFBS_chinmo|FBsf0000209672);(TF_binding_site|mE1_TFBS_HSA|FBsf0000361604)
3-hydroxysebacate	31943	3R_11264149_SNP	Intergenic	Intergenic	Intergenic		A	T	T	0.1176	4	30	-1.145	6.46912e-09	(TF_binding_site|BDTNP1_TFBS_dl|FBsf0000311893);(TF_binding_site|mE1_TFBS_bab1|FBsf0000214718);(TF_binding_site|mE1_TFBS_HSA|FBsf0000371856)
3-hydroxysebacate	31943	X_22385944_SNP	FBgn0016975	stnB	INTRON	0	A	T	T	0.1026	4	35	-1.111	2.04754e-08	(transposable_element|FlyBase|FBti0061942)
3-hydroxysebacate	31943	X_22385944_SNP	FBgn0016976	stnA	INTRON	0	A	T	T	0.1026	4	35	-1.111	2.04754e-08	(transposable_element|FlyBase|FBti0061942)
3-hydroxysebacate	31943	3L_5481998_DEL	Intergenic	Intergenic	Intergenic		C	CC	CC	0.1081	4	33	-1.109	2.63451e-08	-
3-hydroxysebacate	31943	3R_18645971_SNP	Intergenic	Intergenic	Intergenic		T	C	C	0.1026	4	35	-1.09	2.97414e-08	-
4-guanidinobutanoate	15681	3L_2575311_SNP	FBgn0010909	msn	INTRON	0	G	A	A	0.1	4	36	-0.402	5.4741e-10	-
4-methyl-2-oxopentanoate	22116	2R_18664272_SNP	FBgn0259145	CG42260	INTRON	0	T	C	C	0.1	4	36	-0.3082	2.70391e-08	-
4-methyl-2-oxopentanoate	22116	2R_18664276_SNP	FBgn0259145	CG42260	INTRON	0	A	G	G	0.1	4	36	-0.3082	2.70391e-08	-
4-methyl-2-oxopentanoate	22116	3L_18207825_SNP	Intergenic	Intergenic	Intergenic		A	C	C	0.1	4	36	-0.3082	2.70391e-08	(TF_binding_site|BDTNP1_TFBS_da|FBsf0000327490)
5-aminolevulinate	2290	3L_3772016_SNP	FBgn0052264	CG32264	INTRON	0	T	G	G	0.1429	5	30	-0.6168	1.3413e-10	-
5-aminolevulinate	2290	2L_17443547_SNP	FBgn0260632	dl	INTRON	0	A	G	G	0.1282	5	34	-0.5922	1.35322e-09	-
5-aminolevulinate	2290	2R_9248122_SNP	Intergenic	Intergenic	Intergenic		T	C	C	0.1282	5	34	-0.5908	1.69333e-09	-
5-aminolevulinate	2290	3R_17666338_SNP	Intergenic	Intergenic	Intergenic		T	A	T	0.15	6	34	-0.5421	2.71444e-09	-
5-aminolevulinate	2290	2L_12158685_SNP	FBgn0051760	CG31760	INTRON	0	G	A	A	0.1579	6	32	-0.5386	4.77727e-09	(TF_binding_site|mE1_TFBS_inv|FBsf0000234885)
5-aminolevulinate	2290	3L_9106705_SNP	FBgn0011206	bol	INTRON	0	T	G	G	0.1081	4	33	-0.6313	7.48701e-09	(TF_binding_site|BDTNP1_TFBS_da|FBsf0000326477);(TF_binding_site|BDTNP1_TFBS_dl|FBsf0000306417);(TF_binding_site|BDTNP1_TFBS_twi|FBsf0000203298);(TF_binding_site|mE1_TFBS_HSA|FBsf0000363544)
5-aminolevulinate	2290	3R_10182513_SNP	FBgn0024321	NK7.1	INTRON	0	T	A	A	0.1316	5	33	-0.5779	8.25118e-09	-
5-aminolevulinate	2290	3L_6591953_SNP	FBgn0002926	ndl	SYNONYMOUS_CODING	0	A	C	A	0.1282	5	34	-0.5759	1.0312e-08	-
5-aminolevulinate	2290	2R_4108645_SNP	FBgn0053087	LRP1	SYNONYMOUS_CODING	0	T	C	C	0.1053	4	34	-0.6239	1.979e-08	(TF_binding_site|mE1_TFBS_chinmo|FBsf0000210849);(TF_binding_site|mE1_TFBS_HSA|FBsf0000354474);(TF_binding_site|mE1_TFBS_inv|FBsf0000236381)
5-aminolevulinate	2290	3L_4067651_SNP	FBgn0024179	wit	SYNONYMOUS_CODING	0	A	G	G	0.125	5	35	-0.5648	2.42264e-08	-
6-phosphogluconate	15442	X_13808348_SNP	FBgn0267033	mamo	INTRON	0	T	G	G	0.2105	8	30	-0.8302	1.08437e-09	-
6-phosphogluconate	15442	3L_17053261_SNP	FBgn0260943	Rbp6	UTR_3_PRIME	0	T	C	C	0.1053	4	34	-1.068	6.8883e-09	-
6-phosphogluconate	15442	3L_12383487_SNP	FBgn0036279	Ncc69	INTRON	0	A	T	T	0.1	4	36	-1.064	7.36838e-09	-
6-phosphogluconate	15442	3L_8039324_SNP	FBgn0011817	nmo	INTRON	0	A	T	T	0.1	4	36	-1.064	7.36838e-09	-
6-phosphogluconate	15442	3R_15822199_SNP	FBgn0038755	Hs6st	INTRON	0	T	C	C	0.1579	6	32	-0.888	1.43545e-08	(TF_binding_site|BDTNP1_TFBS_da|FBsf0000329869);(TF_binding_site|BDTNP1_TFBS_dl|FBsf0000312903);(TF_binding_site|BDTNP1_TFBS_Med|FBsf0000285948);(TF_binding_site|BDTNP1_TFBS_prd|FBsf0000276692);(TF_binding_site|BDTNP1_TFBS_twi|FBsf0000265522);(TF_binding_site|mE1_TFBS_HSA|FBsf0000373347)
6-phosphogluconate	15442	X_13808346_SNP	FBgn0267033	mamo	INTRON	0	G	T	T	0.225	9	31	-0.7509	2.0031e-08	-
9,10-DiHOME	38399	3L_20433761_SNP	FBgn0264571	CR43943	DOWNSTREAM	98	T	C	C	0.1081	4	33	-0.5618	6.8491e-13	-
9,10-DiHOME	38399	3L_20433761_SNP	FBgn0266686	CR45176	DOWNSTREAM	740	T	C	C	0.1081	4	33	-0.5618	6.8491e-13	-
9,10-DiHOME	38399	3L_20433761_SNP	FBgn0036992	CG11796	UPSTREAM	789	T	C	C	0.1081	4	33	-0.5618	6.8491e-13	-
9,10-DiHOME	38399	3R_23331989_SNP	Intergenic	Intergenic	Intergenic		C	T	T	0.1	4	36	-0.5567	1.348e-12	-
9,10-DiHOME	38399	3R_23332008_SNP	Intergenic	Intergenic	Intergenic		C	T	T	0.1	4	36	-0.5567	1.348e-12	-
9,10-DiHOME	38399	3R_23332013_SNP	Intergenic	Intergenic	Intergenic		T	A	A	0.1	4	36	-0.5567	1.348e-12	-
9,10-DiHOME	38399	2R_19455060_SNP	FBgn0015903	apt	INTRON	0	A	T	A	0.1026	4	35	-0.5521	3.9766e-12	-
9,10-DiHOME	38399	3R_5224559_SNP	FBgn0037685	Or85f	SYNONYMOUS_CODING	0	A	T	A	0.1026	4	35	-0.5227	5.1964e-10	(TF_binding_site|BDTNP1_TFBS_bcd|FBsf0000334194);(TF_binding_site|BDTNP1_TFBS_da|FBsf0000328697);(TF_binding_site|BDTNP1_TFBS_dl|FBsf0000310662);(TF_binding_site|BDTNP1_TFBS_gt|FBsf0000294329);(TF_binding_site|BDTNP1_TFBS_Med|FBsf0000284805);(TF_binding_site|BDTNP1_TFBS_sna|FBsf0000270816);(TF_binding_site|BDTNP1_TFBS_tll|FBsf0000267155);(TF_binding_site|BDTNP1_TFBS_twi|FBsf0000264564);(TF_bindin…
9,10-DiHOME	38399	3R_5224559_SNP	FBgn0083953	CG34117	DOWNSTREAM	733	A	T	A	0.1026	4	35	-0.5227	5.1964e-10	(TF_binding_site|BDTNP1_TFBS_bcd|FBsf0000334194);(TF_binding_site|BDTNP1_TFBS_da|FBsf0000328697);(TF_binding_site|BDTNP1_TFBS_dl|FBsf0000310662);(TF_binding_site|BDTNP1_TFBS_gt|FBsf0000294329);(TF_binding_site|BDTNP1_TFBS_Med|FBsf0000284805);(TF_binding_site|BDTNP1_TFBS_sna|FBsf0000270816);(TF_binding_site|BDTNP1_TFBS_tll|FBsf0000267155);(TF_binding_site|BDTNP1_TFBS_twi|FBsf0000264564);(TF_bindin…
9,10-DiHOME	38399	3L_2464926_SNP	FBgn0266696	CG45186	DOWNSTREAM	77	G	T	T	0.1026	4	35	-0.5072	4.33865e-09	-
9,10-DiHOME	38399	2R_17942641_DEL	Intergenic	Intergenic	Intergenic		C	CATTTCTCCCGCCAC	CATTTCTCCCGCCAC	0.1	4	36	-0.5061	4.34432e-09	-
9,10-DiHOME	38399	2R_8078325_SNP	FBgn0033697	Cyp6t3	NON_SYNONYMOUS_CODING	0	T	G	G	0.1	4	36	-0.5061	4.34432e-09	-
9,10-DiHOME	38399	2R_8078325_SNP	FBgn0033696	Cyp6g2	UPSTREAM	443	T	G	G	0.1	4	36	-0.5061	4.34432e-09	-
9,10-DiHOME	38399	2R_8077706_SNP	FBgn0033696	Cyp6g2	SYNONYMOUS_CODING	0	T	G	G	0.1026	4	35	-0.5069	4.37568e-09	(TF_binding_site|mE1_TFBS_cad|FBsf0000246428);(TF_binding_site|mE1_TFBS_chinmo|FBsf0000211132)
9,10-DiHOME	38399	2R_8077706_SNP	FBgn0033697	Cyp6t3	UPSTREAM	481	T	G	G	0.1026	4	35	-0.5069	4.37568e-09	(TF_binding_site|mE1_TFBS_cad|FBsf0000246428);(TF_binding_site|mE1_TFBS_chinmo|FBsf0000211132)
9,10-DiHOME	38399	2R_3560419_SNP	FBgn0033208	mRpL52	DOWNSTREAM	807	T	C	C	0.15	6	34	-0.42	7.97006e-09	(TF_binding_site|mE1_TFBS_inv|FBsf0000236358)
9,10-DiHOME	38399	2R_17241326_SNP	Intergenic	Intergenic	Intergenic		C	A	C	0.1	4	36	-0.4962	1.09906e-08	-
9,10-DiHOME	38399	2L_19096980_SNP	FBgn0002023	Lim3	INTRON	0	T	G	G	0.1351	5	32	-0.4543	1.35311e-08	-
9,10-DiHOME	38399	3L_13652976_SNP	FBgn0264001	bru-3	INTRON	0	T	A	T	0.225	9	31	-0.3566	1.82385e-08	-
9,10-DiHOME	38399	2L_11778688_SNP	Intergenic	Intergenic	Intergenic		G	A	A	0.1026	4	35	-0.4963	2.48374e-08	-
9,10-DiHOME	38399	3R_16185371_SNP	FBgn0266381	CR45023	EXON	0	G	A	A	0.125	5	35	-0.4414	2.67854e-08	-
9,10-DiHOME	38399	3R_16185371_SNP	FBgn0038790	MtnC	UPSTREAM	659	G	A	A	0.125	5	35	-0.4414	2.67854e-08	-
alanylleucine	37093	3L_3499429_DEL	FBgn0259224	CG42324	INTRON	0	C	CA	CA	0.1316	5	33	-0.4113	1.78477e-09	-
alanylleucine	37093	2L_6271000_SNP	FBgn0053531	Ddr	INTRON	0	T	A	A	0.1	4	36	-0.4446	4.65773e-09	-
alanylleucine	37093	2L_6271000_SNP	FBgn0261699	CR42735	UPSTREAM	24	T	A	A	0.1	4	36	-0.4446	4.65773e-09	-
alanylleucine	37093	2L_6271039_SNP	FBgn0053531	Ddr	INTRON	0	G	A	A	0.1	4	36	-0.4446	4.65773e-09	-
alanylleucine	37093	2L_6271039_SNP	FBgn0261699	CR42735	EXON	0	G	A	A	0.1	4	36	-0.4446	4.65773e-09	-
alanylleucine	37093	2R_19415243_SNP	FBgn0261786	mi	UTR_3_PRIME	0	A	T	T	0.1	4	36	-0.4446	4.65773e-09	(TF_binding_site|BDTNP1_TFBS_da|FBsf0000325249);(TF_binding_site|BDTNP1_TFBS_dl|FBsf0000304107);(TF_binding_site|BDTNP1_TFBS_Med|FBsf0000281373);(TF_binding_site|BDTNP1_TFBS_twi|FBsf0000200252);(TF_binding_site|mE1_TFBS_cad|FBsf0000247348);(TF_binding_site|mE1_TFBS_HSA|FBsf0000359813)
alanylleucine	37093	2R_19415243_SNP	FBgn0000241	bw	DOWNSTREAM	85	A	T	T	0.1	4	36	-0.4446	4.65773e-09	(TF_binding_site|BDTNP1_TFBS_da|FBsf0000325249);(TF_binding_site|BDTNP1_TFBS_dl|FBsf0000304107);(TF_binding_site|BDTNP1_TFBS_Med|FBsf0000281373);(TF_binding_site|BDTNP1_TFBS_twi|FBsf0000200252);(TF_binding_site|mE1_TFBS_cad|FBsf0000247348);(TF_binding_site|mE1_TFBS_HSA|FBsf0000359813)
alanylleucine	37093	2R_19415265_SNP	FBgn0261786	mi	UTR_3_PRIME	0	A	T	T	0.1	4	36	-0.4446	4.65773e-09	(TF_binding_site|BDTNP1_TFBS_da|FBsf0000325249);(TF_binding_site|BDTNP1_TFBS_dl|FBsf0000304107);(TF_binding_site|BDTNP1_TFBS_Med|FBsf0000281373);(TF_binding_site|BDTNP1_TFBS_twi|FBsf0000200252);(TF_binding_site|mE1_TFBS_cad|FBsf0000247348);(TF_binding_site|mE1_TFBS_HSA|FBsf0000359813)
alanylleucine	37093	2R_19415265_SNP	FBgn0000241	bw	DOWNSTREAM	63	A	T	T	0.1	4	36	-0.4446	4.65773e-09	(TF_binding_site|BDTNP1_TFBS_da|FBsf0000325249);(TF_binding_site|BDTNP1_TFBS_dl|FBsf0000304107);(TF_binding_site|BDTNP1_TFBS_Med|FBsf0000281373);(TF_binding_site|BDTNP1_TFBS_twi|FBsf0000200252);(TF_binding_site|mE1_TFBS_cad|FBsf0000247348);(TF_binding_site|mE1_TFBS_HSA|FBsf0000359813)
alanylleucine	37093	2R_19415252_SNP	FBgn0261786	mi	UTR_3_PRIME	0	C	A	A	0.1143	4	31	-0.4414	1.08137e-08	(TF_binding_site|BDTNP1_TFBS_da|FBsf0000325249);(TF_binding_site|BDTNP1_TFBS_dl|FBsf0000304107);(TF_binding_site|BDTNP1_TFBS_Med|FBsf0000281373);(TF_binding_site|BDTNP1_TFBS_twi|FBsf0000200252);(TF_binding_site|mE1_TFBS_cad|FBsf0000247348);(TF_binding_site|mE1_TFBS_HSA|FBsf0000359813)
alanylleucine	37093	2R_19415252_SNP	FBgn0000241	bw	DOWNSTREAM	76	C	A	A	0.1143	4	31	-0.4414	1.08137e-08	(TF_binding_site|BDTNP1_TFBS_da|FBsf0000325249);(TF_binding_site|BDTNP1_TFBS_dl|FBsf0000304107);(TF_binding_site|BDTNP1_TFBS_Med|FBsf0000281373);(TF_binding_site|BDTNP1_TFBS_twi|FBsf0000200252);(TF_binding_site|mE1_TFBS_cad|FBsf0000247348);(TF_binding_site|mE1_TFBS_HSA|FBsf0000359813)
alpha-hydroxyisocaproate	22132	3L_8584163_SNP	FBgn0262508	CG43078	INTRON	0	G	A	A	0.1	4	36	-0.6419	1.71877e-08	(TF_binding_site|mE1_TFBS_chinmo|FBsf0000209983);(TF_binding_site|mE1_TFBS_HSA|FBsf0000363363)
alpha-hydroxyisocaproate	22132	3L_6976528_SNP	FBgn0250849	CG32388	DOWNSTREAM	45	T	G	G	0.1282	5	34	-0.5799	2.32218e-08	(TF_binding_site|mE1_TFBS_sens|FBsf0000223296)
alpha-hydroxyisocaproate	22132	3L_6976528_SNP	FBgn0263387	CG43439	DOWNSTREAM	45	T	G	G	0.1282	5	34	-0.5799	2.32218e-08	(TF_binding_site|mE1_TFBS_sens|FBsf0000223296)
alpha-hydroxyisocaproate	22132	3L_8583110_SNP	FBgn0262508	CG43078	INTRON	0	A	G	G	0.1026	4	35	-0.6374	2.64278e-08	-
alpha-hydroxyisocaproate	22132	3L_18269289_SNP	Intergenic	Intergenic	Intergenic		G	T	T	0.1538	6	33	-0.5349	2.92433e-08	-
alpha-hydroxyisocaproate	22132	3L_18269518_SNP	Intergenic	Intergenic	Intergenic		G	A	A	0.1538	6	33	-0.5349	2.92433e-08	-
alpha-hydroxyisovalerate	46537	2L_7778600_SNP	FBgn0020880	CG7179	UPSTREAM	571	A	G	G	0.1026	4	35	-0.8543	2.10403e-09	-
alpha-hydroxyisovalerate	46537	3L_21939591_SNP	FBgn0037142	CG14562	INTRON	0	G	A	A	0.1351	5	32	-0.774	3.32328e-09	-
alpha-hydroxyisovalerate	46537	2L_7778638_SNP	FBgn0020880	CG7179	UPSTREAM	609	C	T	T	0.1	4	36	-0.8445	3.89364e-09	-
alpha-hydroxyisovalerate	46537	2L_7778643_SNP	FBgn0020880	CG7179	UPSTREAM	614	G	C	C	0.1	4	36	-0.8445	3.89364e-09	-
alpha-hydroxyisovalerate	46537	2R_10346457_SNP	FBgn0261613	Oaz	INTRON	0	A	G	G	0.1053	4	34	-0.8437	4.8712e-09	(TF_binding_site|BDTNP1_TFBS_dl|FBsf0000302133);(TF_binding_site|mE1_TFBS_HSA|FBsf0000356719);(TF_binding_site|mE1_TFBS_Trl|FBsf0000338617)
alpha-hydroxyisovalerate	46537	2R_10330972_SNP	FBgn0261613	Oaz	INTRON	0	A	G	G	0.1053	4	34	-0.8349	8.77017e-09	-
alpha-hydroxyisovalerate	46537	2R_10341997_SNP	FBgn0261613	Oaz	INTRON	0	A	T	T	0.1026	4	35	-0.8278	1.28259e-08	(TF_binding_site|BDTNP1_TFBS_da|FBsf0000324236);(TF_binding_site|BDTNP1_TFBS_dl|FBsf0000302128);(TF_binding_site|BDTNP1_TFBS_gt|FBsf0000293509);(TF_binding_site|BDTNP1_TFBS_Med|FBsf0000280343);(TF_binding_site|BDTNP1_TFBS_slp1|FBsf0000272171);(TF_binding_site|BDTNP1_TFBS_twi|FBsf0000199369);(TF_binding_site|mE1_TFBS_cad|FBsf0000246649);(TF_binding_site|mE1_TFBS_HSA|FBsf0000356717);(TF_binding_sit…
alpha-hydroxyisovalerate	46537	2R_10342117_SNP	FBgn0261613	Oaz	INTRON	0	A	G	G	0.1026	4	35	-0.8278	1.28259e-08	(TF_binding_site|BDTNP1_TFBS_da|FBsf0000324236);(TF_binding_site|BDTNP1_TFBS_dl|FBsf0000302129);(TF_binding_site|BDTNP1_TFBS_gt|FBsf0000293509);(TF_binding_site|BDTNP1_TFBS_Med|FBsf0000280343);(TF_binding_site|BDTNP1_TFBS_twi|FBsf0000199369);(TF_binding_site|mE1_TFBS_HSA|FBsf0000356717)
alpha-hydroxyisovalerate	46537	2R_10345644_SNP	FBgn0261613	Oaz	INTRON	0	T	G	G	0.1026	4	35	-0.8278	1.28259e-08	(silencer|mE1_HDAC_PRE|FBsf0000343459);(TF_binding_site|BDTNP1_TFBS_da|FBsf0000324237);(TF_binding_site|BDTNP1_TFBS_dl|FBsf0000302132);(TF_binding_site|BDTNP1_TFBS_Med|FBsf0000280345);(TF_binding_site|BDTNP1_TFBS_twi|FBsf0000199371);(TF_binding_site|mE1_TFBS_HSA|FBsf0000356719);(TF_binding_site|mE1_TFBS_Trl|FBsf0000338617);(TF_binding_site|mE1_TFBS_zfh1|FBsf0000334685)
alpha-hydroxyisovalerate	46537	2R_10346545_SNP	FBgn0261613	Oaz	INTRON	0	A	T	T	0.1026	4	35	-0.8278	1.28259e-08	(TF_binding_site|BDTNP1_TFBS_dl|FBsf0000302133);(TF_binding_site|mE1_TFBS_HSA|FBsf0000356719);(TF_binding_site|mE1_TFBS_Trl|FBsf0000338617)
alpha-hydroxyisovalerate	46537	2R_10346651_SNP	FBgn0261613	Oaz	INTRON	0	A	C	C	0.1026	4	35	-0.8278	1.28259e-08	(TF_binding_site|BDTNP1_TFBS_dl|FBsf0000302133);(TF_binding_site|mE1_TFBS_Trl|FBsf0000338617)
alpha-hydroxyisovalerate	46537	2R_10346657_SNP	FBgn0261613	Oaz	INTRON	0	T	C	C	0.1026	4	35	-0.8278	1.28259e-08	(TF_binding_site|BDTNP1_TFBS_dl|FBsf0000302133);(TF_binding_site|mE1_TFBS_Trl|FBsf0000338617)
alpha-hydroxyisovalerate	46537	2R_10346635_INS	FBgn0261613	Oaz	INTRON	0	AATAAGTCTTCATATCAA	A	A	0.1053	4	34	-0.8259	1.56211e-08	(TF_binding_site|BDTNP1_TFBS_dl|FBsf0000302133);(TF_binding_site|mE1_TFBS_HSA|FBsf0000356719);(TF_binding_site|mE1_TFBS_Trl|FBsf0000338617)
alpha-hydroxyisovalerate	46537	2R_10346641_SNP	FBgn0261613	Oaz	INTRON	0	A	G	G	0.1053	4	34	-0.8259	1.56211e-08	(TF_binding_site|BDTNP1_TFBS_dl|FBsf0000302133);(TF_binding_site|mE1_TFBS_HSA|FBsf0000356719);(TF_binding_site|mE1_TFBS_Trl|FBsf0000338617)
alpha-hydroxyisovalerate	46537	3R_25130732_SNP	Intergenic	Intergenic	Intergenic		A	G	G	0.125	5	35	-0.7421	2.18233e-08	(TF_binding_site|BDTNP1_TFBS_da|FBsf0000330779);(TF_binding_site|BDTNP1_TFBS_dl|FBsf0000314565);(TF_binding_site|BDTNP1_TFBS_Med|FBsf0000286849);(TF_binding_site|BDTNP1_TFBS_sna|FBsf0000271473);(TF_binding_site|BDTNP1_TFBS_twi|FBsf0000266330);(TF_binding_site|mE1_TFBS_cad|FBsf0000249499);(TF_binding_site|mE1_TFBS_HSA|FBsf0000376291);(TF_binding_site|mE1_TFBS_sens|FBsf0000234039)
alpha-ketoglutarate	528	2L_5864641_SNP	FBgn0031745	rau	INTRON	0	C	A	A	0.1579	6	32	-0.5068	3.20394e-09	(TF_binding_site|BDTNP1_TFBS_twi|FBsf0000200948)
alpha-ketoglutarate	528	2L_932955_SNP	FBgn0028481	CG4341	INTRON	0	T	A	A	0.1053	4	34	-0.5903	1.12357e-08	(TF_binding_site|BDTNP1_TFBS_twi|FBsf0000200530)
alpha-ketoglutarate	528	3L_14327309_SNP	FBgn0001085	fz	INTRON	0	A	G	G	0.1	4	36	-0.5827	1.50093e-08	(TF_binding_site|BDTNP1_TFBS_dl|FBsf0000307429);(TF_binding_site|BDTNP1_TFBS_twi|FBsf0000203789);(TF_binding_site|mE1_TFBS_cad|FBsf0000245003)
alpha-ketoglutarate	528	3L_4084208_SNP	FBgn0004516	Gad1	INTRON	0	T	C	C	0.1	4	36	-0.5827	1.50093e-08	-
alpha-ketoglutarate	528	2L_5864462_SNP	FBgn0031745	rau	INTRON	0	A	G	G	0.1538	6	33	-0.4863	2.74539e-08	-
alpha-ketoglutarate	528	3L_4323926_SNP	FBgn0035533	Cip4	UTR_3_PRIME	0	G	T	T	0.1538	6	33	-0.4859	2.85124e-08	-
alpha-tocotrienol	37502	2R_16679322_SNP	FBgn0263743	CG43668	NON_SYNONYMOUS_CODING	0	G	A	A	0.25	10	30	-0.5984	8.57924e-09	-
alpha-tocotrienol	37502	2R_16679322_SNP	FBgn0263760	CG43677	UPSTREAM	670	G	A	A	0.25	10	30	-0.5984	8.57924e-09	-
alpha-tocotrienol	37502	3R_17765438_SNP	Intergenic	Intergenic	Intergenic		A	T	T	0.25	10	30	-0.587	2.3559e-08	-
argininosuccinate	15497	2L_14110853_SNP	FBgn0051769	CG31769	UPSTREAM	114	T	G	G	0.1316	5	33	-0.5118	7.82849e-09	-
argininosuccinate	15497	2L_14110841_SNP	FBgn0051769	CG31769	UPSTREAM	102	T	A	A	0.1282	5	34	-0.5079	1.07192e-08	-
argininosuccinate	15497	2L_14110843_SNP	FBgn0051769	CG31769	UPSTREAM	104	G	A	A	0.1282	5	34	-0.5079	1.07192e-08	-
argininosuccinate	15497	2L_14111029_SNP	FBgn0051769	CG31769	UPSTREAM	290	A	G	G	0.1282	5	34	-0.5026	1.90195e-08	-
azelate (nonanedioate)	18362	2R_5697831_SNP	FBgn0033446	CG1648	DOWNSTREAM	648	A	G	G	0.1282	5	34	-0.6042	8.0496e-10	(TF_binding_site|mE1_TFBS_bab1|FBsf0000214200)
azelate (nonanedioate)	18362	2R_5700957_SNP	FBgn0033446	CG1648	INTRON	0	A	G	G	0.1282	5	34	-0.6042	8.0496e-10	-
azelate (nonanedioate)	18362	2R_5701127_SNP	FBgn0033446	CG1648	INTRON	0	C	T	T	0.1282	5	34	-0.6042	8.0496e-10	-
azelate (nonanedioate)	18362	2L_13888129_SNP	FBgn0028509	CenG1A	INTRON	0	A	T	A	0.1579	6	32	-0.5473	3.46952e-09	(TF_binding_site|BDTNP1_TFBS_da|FBsf0000322370);(TF_binding_site|BDTNP1_TFBS_dl|FBsf0000298554);(TF_binding_site|BDTNP1_TFBS_hb|FBsf0000290823);(TF_binding_site|BDTNP1_TFBS_Med|FBsf0000278538);(TF_binding_site|BDTNP1_TFBS_twi|FBsf0000201662);(TF_binding_site|mE1_TFBS_cad|FBsf0000242081);(TF_binding_site|mE1_TFBS_HSA|FBsf0000350935)
azelate (nonanedioate)	18362	2L_10860540_SNP	FBgn0027363	Stam	SYNONYMOUS_CODING	0	A	C	C	0.1053	4	34	-0.6489	4.03305e-09	(TF_binding_site|mE1_TFBS_cad|FBsf0000241858);(TF_binding_site|mE1_TFBS_chinmo|FBsf0000207566)
azelate (nonanedioate)	18362	2R_4524375_SNP	Intergenic	Intergenic	Intergenic		G	C	C	0.1282	5	34	-0.5713	2.17297e-08	(TF_binding_site|BDTNP1_TFBS_da|FBsf0000323511);(TF_binding_site|BDTNP1_TFBS_dl|FBsf0000300696);(TF_binding_site|BDTNP1_TFBS_ftz|FBsf0000295170);(TF_binding_site|BDTNP1_TFBS_hb|FBsf0000289999);(TF_binding_site|BDTNP1_TFBS_Med|FBsf0000279565);(TF_binding_site|BDTNP1_TFBS_prd|FBsf0000274267);(TF_binding_site|BDTNP1_TFBS_slp1|FBsf0000272017);(TF_binding_site|BDTNP1_TFBS_twi|FBsf0000198764);(TF_bindi…
azelate (nonanedioate)	18362	3R_21148989_SNP	FBgn0045761	CHKov1	UTR_3_PRIME	0	A	G	G	0.1282	5	34	-0.5677	2.43377e-08	-
azelate (nonanedioate)	18362	3R_21148989_SNP	FBgn0039326	CG10562	UPSTREAM	510	A	G	G	0.1282	5	34	-0.5677	2.43377e-08	-
beta-hydroxyisovalerate	12129	3L_474031_SNP	FBgn0001316	klar	INTRON	0	C	T	T	0.2	8	32	-0.445	3.1124e-10	-
beta-hydroxyisovalerate	12129	3L_474040_SNP	FBgn0001316	klar	INTRON	0	G	A	A	0.2	8	32	-0.445	3.1124e-10	-
betaine	3141	2R_10226034_SNP	FBgn0085408	Shroom	INTRON	0	A	T	T	0.1	4	36	-0.6713	9.4688e-11	-
betaine	3141	3R_15150790_SNP	FBgn0000463	Dl	INTRON	0	G	C	G	0.1	4	36	-0.6713	9.4688e-11	(TF_binding_site|BDTNP1_TFBS_da|FBsf0000329799);(TF_binding_site|BDTNP1_TFBS_twi|FBsf0000265477);(TF_binding_site|mE1_TFBS_cad|FBsf0000248760);(TF_binding_site|mE1_TFBS_HSA|FBsf0000373148);(TF_binding_site|mE1_TFBS_Trl|FBsf0000341372)
betaine	3141	3R_15150791_SNP	FBgn0000463	Dl	INTRON	0	C	A	C	0.1	4	36	-0.6713	9.4688e-11	(TF_binding_site|BDTNP1_TFBS_da|FBsf0000329799);(TF_binding_site|BDTNP1_TFBS_twi|FBsf0000265477);(TF_binding_site|mE1_TFBS_cad|FBsf0000248760);(TF_binding_site|mE1_TFBS_HSA|FBsf0000373148);(TF_binding_site|mE1_TFBS_Trl|FBsf0000341372)
betaine	3141	3R_15151041_SNP	FBgn0000463	Dl	INTRON	0	T	C	T	0.1	4	36	-0.6713	9.4688e-11	(TF_binding_site|BDTNP1_TFBS_da|FBsf0000329799);(TF_binding_site|BDTNP1_TFBS_dl|FBsf0000312795);(TF_binding_site|BDTNP1_TFBS_twi|FBsf0000265477);(TF_binding_site|mE1_TFBS_cad|FBsf0000248760);(TF_binding_site|mE1_TFBS_HSA|FBsf0000373148);(TF_binding_site|mE1_TFBS_Trl|FBsf0000341372)
betaine	3141	3R_15151138_SNP	FBgn0000463	Dl	INTRON	0	A	G	A	0.1	4	36	-0.6713	9.4688e-11	(TF_binding_site|BDTNP1_TFBS_da|FBsf0000329800);(TF_binding_site|BDTNP1_TFBS_dl|FBsf0000312795);(TF_binding_site|BDTNP1_TFBS_twi|FBsf0000265477);(TF_binding_site|mE1_TFBS_cad|FBsf0000248760);(TF_binding_site|mE1_TFBS_D|FBsf0000240068);(TF_binding_site|mE1_TFBS_HSA|FBsf0000373148);(TF_binding_site|mE1_TFBS_Trl|FBsf0000341373)
betaine	3141	3R_15151177_SNP	FBgn0000463	Dl	INTRON	0	A	G	A	0.1	4	36	-0.6713	9.4688e-11	(TF_binding_site|BDTNP1_TFBS_da|FBsf0000329800);(TF_binding_site|BDTNP1_TFBS_dl|FBsf0000312795);(TF_binding_site|BDTNP1_TFBS_Med|FBsf0000285888);(TF_binding_site|BDTNP1_TFBS_twi|FBsf0000265477);(TF_binding_site|mE1_TFBS_cad|FBsf0000248760);(TF_binding_site|mE1_TFBS_D|FBsf0000240068);(TF_binding_site|mE1_TFBS_HSA|FBsf0000373148);(TF_binding_site|mE1_TFBS_Trl|FBsf0000341373)
betaine	3141	3L_1578865_SNP	FBgn0035237	CG13917	INTRON	0	T	G	G	0.1	4	36	-0.6316	4.90956e-09	(TF_binding_site|BDTNP1_TFBS_da|FBsf0000325776);(TF_binding_site|BDTNP1_TFBS_dl|FBsf0000305053);(TF_binding_site|BDTNP1_TFBS_Med|FBsf0000281876);(TF_binding_site|BDTNP1_TFBS_twi|FBsf0000202695)
betaine	3141	X_2463621_SNP	FBgn0260753	Pdfr	INTRON	0	T	C	C	0.1081	4	33	-0.6331	5.4853e-09	-
betaine	3141	3L_1578326_SNP	FBgn0035237	CG13917	INTRON	0	A	C	C	0.1026	4	35	-0.6308	5.61651e-09	(TF_binding_site|BDTNP1_TFBS_da|FBsf0000325776);(TF_binding_site|BDTNP1_TFBS_dl|FBsf0000305052);(TF_binding_site|BDTNP1_TFBS_twi|FBsf0000202695);(TF_binding_site|mE1_TFBS_sens|FBsf0000222456);(TF_binding_site|mE1_TFBS_Trl|FBsf0000339360)
betaine	3141	2R_10348421_SNP	FBgn0261613	Oaz	INTRON	0	T	C	C	0.1026	4	35	-0.631	6.073e-09	(TF_binding_site|mE1_TFBS_cad|FBsf0000246650)
betaine	3141	2R_16115445_SNP	Intergenic	Intergenic	Intergenic		T	A	T	0.1	4	36	-0.6273	6.92731e-09	-
betaine	3141	3L_1575863_SNP	FBgn0035236	CG12004	DOWNSTREAM	243	A	G	G	0.1053	4	34	-0.6243	1.03523e-08	(TF_binding_site|BDTNP1_TFBS_dl|FBsf0000305050)
betaine	3141	3L_1575863_SNP	FBgn0035237	CG13917	UPSTREAM	836	A	G	G	0.1053	4	34	-0.6243	1.03523e-08	(TF_binding_site|BDTNP1_TFBS_dl|FBsf0000305050)
betaine	3141	3R_9591994_SNP	FBgn0038179	CG9312	NON_SYNONYMOUS_CODING	0	T	C	C	0.15	6	34	-0.5232	1.33824e-08	-
betaine	3141	X_16795830_SNP	FBgn0265967	CR44754	EXON	0	A	G	G	0.1026	4	35	-0.6212	1.43523e-08	-
betaine	3141	2R_16229045_SNP	FBgn0034505	CG16739	UPSTREAM	453	C	T	T	0.125	5	35	-0.5626	1.53716e-08	-
betaine	3141	3L_2311237_SNP	Intergenic	Intergenic	Intergenic		C	T	T	0.1	4	36	-0.619	1.61529e-08	-
betaine	3141	2L_3864177_SNP	FBgn0031574	CG3964	SYNONYMOUS_CODING	0	A	G	A	0.1026	4	35	-0.6195	1.76377e-08	(TF_binding_site|BDTNP1_TFBS_sna|FBsf0000268295)
betaine	3141	2R_19535680_SNP	FBgn0004795	retn	INTRON	0	A	G	G	0.1	4	36	-0.6127	2.90078e-08	(TF_binding_site|BDTNP1_TFBS_dl|FBsf0000304166);(TF_binding_site|mE1_TFBS_HSA|FBsf0000359873)
betaine	3141	3L_7994278_SNP	FBgn0011817	nmo	INTRON	0	C	T	T	0.1	4	36	-0.6127	2.90078e-08	-
biliverdin	2137	2R_10663357_SNP	FBgn0001319	kn	INTRON	0	A	G	G	0.1	4	36	-0.3676	1.45511e-08	(TF_binding_site|mE1_TFBS_cad|FBsf0000246674);(TF_binding_site|mE1_TFBS_sens|FBsf0000228043)
biliverdin	2137	2R_16301708_SNP	Intergenic	Intergenic	Intergenic		T	G	G	0.1	4	36	-0.3676	1.45511e-08	-
biliverdin	2137	X_5325444_SNP	FBgn0029766	CG15784	SYNONYMOUS_CODING	0	G	C	C	0.1026	4	35	-0.3686	1.72626e-08	(TF_binding_site|BDTNP1_TFBS_sna|FBsf0000269936);(TF_binding_site|mE1_TFBS_chinmo|FBsf0000208339);(TF_binding_site|mE1_TFBS_HSA|FBsf0000379484)
biotin	568	2L_1389116_SNP	FBgn0002543	lea	INTRON	0	T	C	C	0.3611	13	23	-0.3227	2.73264e-08	-
caprate (10:0)	1642	2L_16459070_SNP	Intergenic	Intergenic	Intergenic		A	C	A	0.3684	14	24	-0.2049	2.12751e-08	(regulatory_region|REDfly_CRMs|FBsf0000435041);(regulatory_region|REDfly_CRMs|FBsf0000435520);(TF_binding_site|mE1_TFBS_cnc|FBsf0000206269)
carboxyethyl-GABA	40007	3L_18641183_DEL	FBgn0036801	MYPT-75D	INTRON	0	TCT	T	TCT	0.1111	4	32	-0.7502	1.29254e-09	(TF_binding_site|BDTNP1_TFBS_twi|FBsf0000204219)
carboxyethyl-GABA	40007	X_5659847_SNP	FBgn0261610	CG42699	INTRON	0	G	A	A	0.1316	5	33	-0.6673	3.43565e-09	(TF_binding_site|mE1_TFBS_chinmo|FBsf0000208373)
carboxyethyl-GABA	40007	X_5659847_SNP	FBgn0029804	CG3097	DOWNSTREAM	41	G	A	A	0.1316	5	33	-0.6673	3.43565e-09	(TF_binding_site|mE1_TFBS_chinmo|FBsf0000208373)
citrulline	2132	3R_6372864_SNP	FBgn0001235	hth	INTRON	0	T	C	C	0.1111	4	32	-1.416	5.0343e-16	(TF_binding_site|BDTNP1_TFBS_da|FBsf0000328804);(TF_binding_site|BDTNP1_TFBS_dl|FBsf0000310929);(TF_binding_site|BDTNP1_TFBS_twi|FBsf0000264660);(TF_binding_site|mE1_TFBS_HSA|FBsf0000370316)
citrulline	2132	3R_6394208_SNP	FBgn0001235	hth	INTRON	0	A	G	G	0.1	4	36	-1.395	2.9943e-15	(TF_binding_site|mE1_TFBS_cnc|FBsf0000206621)
citrulline	2132	3R_6398723_SNP	FBgn0001235	hth	INTRON	0	C	T	T	0.1	4	36	-1.395	2.9943e-15	(TF_binding_site|BDTNP1_TFBS_dl|FBsf0000310939)
citrulline	2132	2L_13873390_SNP	FBgn0028509	CenG1A	INTRON	0	T	C	C	0.1111	4	32	-1.398	5.1357e-15	-
citrulline	2132	2R_17282348_SNP	FBgn0010415	Sdc	INTRON	0	A	G	A	0.1176	4	30	-1.395	1.0068e-14	-
citrulline	2132	2R_11539513_SNP	FBgn0260429	CG42524	INTRON	0	G	A	A	0.1026	4	35	-1.322	3.3292e-12	-
citrulline	2132	X_12376037_SNP	Intergenic	Intergenic	Intergenic		T	G	G	0.1053	4	34	-1.316	4.9184e-12	-
citrulline	2132	3R_6369759_SNP	FBgn0001235	hth	INTRON	0	G	A	A	0.1316	5	33	-1.195	6.3233e-12	-
citrulline	2132	3R_4247082_SNP	FBgn0266801	CG45263	INTRON	0	C	G	G	0.1026	4	35	-1.297	1.8149e-11	-
citrulline	2132	3R_4247082_SNP	FBgn0037589	Obp85a	UPSTREAM	763	C	G	G	0.1026	4	35	-1.297	1.8149e-11	-
citrulline	2132	3R_4078433_DEL	FBgn0260386	mtg	INTRON	0	T	TAA	TAA	0.1026	4	35	-1.296	1.9919e-11	-
citrulline	2132	3R_4078437_SNP	FBgn0260386	mtg	INTRON	0	T	A	A	0.1026	4	35	-1.296	1.9919e-11	-
citrulline	2132	2L_1887323_SNP	FBgn0031374	CG7337	INTRON	0	A	G	G	0.1	4	36	-1.29	2.6774e-11	(TF_binding_site|BDTNP1_TFBS_da|FBsf0000321101);(TF_binding_site|BDTNP1_TFBS_dl|FBsf0000296101);(TF_binding_site|BDTNP1_TFBS_Med|FBsf0000277223);(TF_binding_site|BDTNP1_TFBS_sna|FBsf0000268205);(TF_binding_site|BDTNP1_TFBS_z|FBsf0000195947);(TF_binding_site|mE1_TFBS_HSA|FBsf0000344489)
citrulline	2132	3R_4067636_SNP	FBgn0037556	CG9636	UTR_3_PRIME	0	A	G	G	0.1	4	36	-1.29	2.6774e-11	-
citrulline	2132	3R_4075096_SNP	FBgn0040528	CG15864	SYNONYMOUS_CODING	0	A	C	C	0.1	4	36	-1.29	2.6774e-11	-
citrulline	2132	3R_4078913_SNP	FBgn0260386	mtg	INTRON	0	A	G	G	0.1	4	36	-1.29	2.6774e-11	(TF_binding_site|mE1_TFBS_cnc|FBsf0000206607)
citrulline	2132	3R_4080595_SNP	FBgn0260386	mtg	INTRON	0	C	T	T	0.1	4	36	-1.29	2.6774e-11	-
citrulline	2132	3R_4080754_SNP	FBgn0260386	mtg	INTRON	0	C	T	T	0.1	4	36	-1.29	2.6774e-11	-
citrulline	2132	3R_4082994_INS	FBgn0260386	mtg	INTRON	0	CG	C	C	0.1	4	36	-1.29	2.6774e-11	-
citrulline	2132	3R_4082997_INS	FBgn0260386	mtg	INTRON	0	CGACGAAACG	C	C	0.1	4	36	-1.29	2.6774e-11	-
citrulline	2132	3R_4085372_SNP	FBgn0260386	mtg	NON_SYNONYMOUS_CODING	0	A	C	C	0.1	4	36	-1.29	2.6774e-11	(TF_binding_site|mE1_TFBS_cad|FBsf0000247884)
citrulline	2132	3R_4087290_SNP	FBgn0037560	CR18228	EXON	0	G	A	A	0.1	4	36	-1.29	2.6774e-11	-
citrulline	2132	3R_4087290_SNP	FBgn0010173	RpA-70	DOWNSTREAM	552	G	A	A	0.1	4	36	-1.29	2.6774e-11	-
citrulline	2132	3R_4087290_SNP	FBgn0260386	mtg	DOWNSTREAM	850	G	A	A	0.1	4	36	-1.29	2.6774e-11	-
citrulline	2132	3R_4096842_SNP	Intergenic	Intergenic	Intergenic		A	G	G	0.1	4	36	-1.29	2.6774e-11	(regulatory_region|REDfly_CRMs|FBsf0000435415);(regulatory_region|REDfly_CRMs|FBsf0000435951)
citrulline	2132	3R_4099793_SNP	Intergenic	Intergenic	Intergenic		T	C	C	0.1	4	36	-1.29	2.6774e-11	(regulatory_region|REDfly_CRMs|FBsf0000435415);(regulatory_region|REDfly_CRMs|FBsf0000435654);(regulatory_region|REDfly_CRMs|FBsf0000435951);(TF_binding_site|BDTNP1_TFBS_da|FBsf0000328538);(TF_binding_site|BDTNP1_TFBS_slp1|FBsf0000272893)
citrulline	2132	3R_4102618_SNP	Intergenic	Intergenic	Intergenic		G	A	A	0.1	4	36	-1.29	2.6774e-11	(regulatory_region|REDfly_CRMs|FBsf0000435401);(regulatory_region|REDfly_CRMs|FBsf0000435415);(regulatory_region|REDfly_CRMs|FBsf0000435654);(regulatory_region|REDfly_CRMs|FBsf0000435951);(TF_binding_site|BDTNP1_TFBS_bcd|FBsf0000334181);(TF_binding_site|BDTNP1_TFBS_da|FBsf0000328540);(TF_binding_site|BDTNP1_TFBS_dl|FBsf0000310362);(TF_binding_site|BDTNP1_TFBS_ftz|FBsf0000295413);(TF_binding_site|…
citrulline	2132	3R_4107770_SNP	Intergenic	Intergenic	Intergenic		T	G	G	0.1	4	36	-1.29	2.6774e-11	(regulatory_region|REDfly_CRMs|FBsf0000435730);(regulatory_region|REDfly_CRMs|FBsf0000436118);(regulatory_region|REDfly_CRMs|FBsf0000436817);(TF_binding_site|BDTNP1_TFBS_dl|FBsf0000310366);(TF_binding_site|BDTNP1_TFBS_gt|FBsf0000294297);(TF_binding_site|BDTNP1_TFBS_Med|FBsf0000284621);(TF_binding_site|BDTNP1_TFBS_prd|FBsf0000276349);(TF_binding_site|mE1_TFBS_HSA|FBsf0000369531);(TF_binding_site|m…
citrulline	2132	3R_4119326_SNP	FBgn0051463	CG31463	UTR_3_PRIME	0	A	C	C	0.1	4	36	-1.29	2.6774e-11	(TF_binding_site|mE1_TFBS_cad|FBsf0000247888);(TF_binding_site|mE1_TFBS_inv|FBsf0000237032)
citrulline	2132	3R_4119326_SNP	FBgn0037565	CG9626	DOWNSTREAM	239	A	C	C	0.1	4	36	-1.29	2.6774e-11	(TF_binding_site|mE1_TFBS_cad|FBsf0000247888);(TF_binding_site|mE1_TFBS_inv|FBsf0000237032)
citrulline	2132	3R_4250675_SNP	FBgn0266801	CG45263	INTRON	0	T	A	A	0.1	4	36	-1.29	2.6774e-11	-
citrulline	2132	3R_4057534_SNP	FBgn0267111	CR45551	EXON	0	T	A	A	0.1053	4	34	-1.288	3.9945e-11	-
citrulline	2132	3R_25065845_SNP	FBgn0051427	CG31427	INTRON	0	C	T	T	0.125	5	35	-1.164	4.5777e-11	-
citrulline	2132	3R_25065845_SNP	FBgn0051445	CG31445	DOWNSTREAM	457	C	T	T	0.125	5	35	-1.164	4.5777e-11	-
citrulline	2132	3R_4228291_SNP	FBgn0266801	CG45263	INTRON	0	T	A	A	0.1026	4	35	-1.283	4.8223e-11	-
citrulline	2132	3R_4069529_SNP	FBgn0037556	CG9636	UPSTREAM	15	G	C	C	0.1053	4	34	-1.28	6.3728e-11	(TF_binding_site|BDTNP1_TFBS_dl|FBsf0000310351);(TF_binding_site|mE1_TFBS_cnc|FBsf0000206606);(TF_binding_site|mE1_TFBS_h|FBsf0000257287);(TF_binding_site|mE1_TFBS_HSA|FBsf0000369515)
citrulline	2132	3R_4069529_SNP	FBgn0042182	CG18749	UPSTREAM	248	G	C	C	0.1053	4	34	-1.28	6.3728e-11	(TF_binding_site|BDTNP1_TFBS_dl|FBsf0000310351);(TF_binding_site|mE1_TFBS_cnc|FBsf0000206606);(TF_binding_site|mE1_TFBS_h|FBsf0000257287);(TF_binding_site|mE1_TFBS_HSA|FBsf0000369515)
citrulline	2132	3R_4069529_SNP	FBgn0064126	CG33722	UPSTREAM	248	G	C	C	0.1053	4	34	-1.28	6.3728e-11	(TF_binding_site|BDTNP1_TFBS_dl|FBsf0000310351);(TF_binding_site|mE1_TFBS_cnc|FBsf0000206606);(TF_binding_site|mE1_TFBS_h|FBsf0000257287);(TF_binding_site|mE1_TFBS_HSA|FBsf0000369515)
citrulline	2132	3R_5999899_DEL	FBgn0037796	CG12814	INTRON	0	T	TGAGCCGCGAGGCGAGAAGGTAAATTAAAT	TGAGCCGCGAGGCGAGAAGGTAAATTAAAT	0.1053	4	34	-1.272	7.1076e-11	-
citrulline	2132	2L_6311165_SNP	FBgn0053531	Ddr	INTRON	0	A	G	G	0.125	5	35	-1.152	1.3506e-10	-
citrulline	2132	2L_14196078_SNP	FBgn0016930	Dyrk2	SYNONYMOUS_CODING	0	T	C	C	0.1026	4	35	-1.264	1.4227e-10	-
citrulline	2132	3L_14208960_SNP	FBgn0013718	nuf	INTRON	0	G	A	A	0.1081	4	33	-1.268	1.4583e-10	-
citrulline	2132	2L_14196643_SNP	FBgn0016930	Dyrk2	INTRON	0	A	G	G	0.1	4	36	-1.259	1.8831e-10	-
citrulline	2132	2L_14196881_SNP	FBgn0016930	Dyrk2	INTRON	0	G	A	A	0.1	4	36	-1.259	1.8831e-10	-
citrulline	2132	2L_14196943_SNP	FBgn0016930	Dyrk2	SYNONYMOUS_CODING	0	G	C	C	0.1	4	36	-1.259	1.8831e-10	-
citrulline	2132	2L_14197080_SNP	FBgn0016930	Dyrk2	NON_SYNONYMOUS_CODING	0	T	C	C	0.1	4	36	-1.259	1.8831e-10	-
citrulline	2132	2L_14197144_SNP	FBgn0016930	Dyrk2	SYNONYMOUS_CODING	0	T	C	C	0.1	4	36	-1.259	1.8831e-10	-
citrulline	2132	2L_14197310_SNP	FBgn0016930	Dyrk2	INTRON	0	G	A	A	0.1	4	36	-1.259	1.8831e-10	-
citrulline	2132	2L_14197428_SNP	FBgn0016930	Dyrk2	INTRON	0	G	A	A	0.1	4	36	-1.259	1.8831e-10	-
citrulline	2132	2L_14198005_SNP	FBgn0016930	Dyrk2	INTRON	0	A	C	C	0.1	4	36	-1.259	1.8831e-10	-
citrulline	2132	3L_14208956_INS	FBgn0013718	nuf	INTRON	0	CC	C	C	0.1026	4	35	-1.259	2.0398e-10	-
citrulline	2132	3L_14208962_SNP	FBgn0013718	nuf	INTRON	0	A	G	G	0.1026	4	35	-1.259	2.0398e-10	-
citrulline	2132	3L_14208963_SNP	FBgn0013718	nuf	INTRON	0	T	A	A	0.1026	4	35	-1.259	2.0398e-10	-
citrulline	2132	3L_14208965_SNP	FBgn0013718	nuf	INTRON	0	T	G	G	0.1026	4	35	-1.259	2.0398e-10	-
citrulline	2132	2L_14196772_SNP	FBgn0016930	Dyrk2	INTRON	0	T	A	A	0.1026	4	35	-1.256	2.4336e-10	-
citrulline	2132	3L_14208952_SNP	FBgn0013718	nuf	INTRON	0	A	T	T	0.1026	4	35	-1.255	2.5623e-10	-
citrulline	2132	2L_6310622_SNP	FBgn0053531	Ddr	INTRON	0	C	G	G	0.1053	4	34	-1.257	3.028e-10	-
citrulline	2132	2R_4479585_SNP	FBgn0262812	CG43183	UPSTREAM	115	G	A	A	0.1026	4	35	-1.249	4.279e-10	-
citrulline	2132	2R_4479585_SNP	FBgn0033307	CG14752	DOWNSTREAM	132	G	A	A	0.1026	4	35	-1.249	4.279e-10	-
citrulline	2132	X_18997298_SNP	Intergenic	Intergenic	Intergenic		A	T	T	0.1	4	36	-1.247	4.2809e-10	-
citrulline	2132	3L_18611999_SNP	FBgn0013717	not	UTR_3_PRIME	0	G	A	A	0.1	4	36	-1.238	5.8369e-10	(TF_binding_site|BDTNP1_TFBS_da|FBsf0000327556);(TF_binding_site|BDTNP1_TFBS_dl|FBsf0000308412);(TF_binding_site|BDTNP1_TFBS_z|FBsf0000197281)
citrulline	2132	3L_18611999_SNP	FBgn0052200	tRNA:CR32200	DOWNSTREAM	438	G	A	A	0.1	4	36	-1.238	5.8369e-10	(TF_binding_site|BDTNP1_TFBS_da|FBsf0000327556);(TF_binding_site|BDTNP1_TFBS_dl|FBsf0000308412);(TF_binding_site|BDTNP1_TFBS_z|FBsf0000197281)
citrulline	2132	3L_18611999_SNP	FBgn0036793	CG4174	UPSTREAM	956	G	A	A	0.1	4	36	-1.238	5.8369e-10	(TF_binding_site|BDTNP1_TFBS_da|FBsf0000327556);(TF_binding_site|BDTNP1_TFBS_dl|FBsf0000308412);(TF_binding_site|BDTNP1_TFBS_z|FBsf0000197281)
citrulline	2132	3L_18611999_SNP	FBgn0036799	CG13380	UPSTREAM	956	G	A	A	0.1	4	36	-1.238	5.8369e-10	(TF_binding_site|BDTNP1_TFBS_da|FBsf0000327556);(TF_binding_site|BDTNP1_TFBS_dl|FBsf0000308412);(TF_binding_site|BDTNP1_TFBS_z|FBsf0000197281)
citrulline	2132	3R_6387460_SNP	FBgn0001235	hth	INTRON	0	A	C	C	0.1538	6	33	-1.044	6.2345e-10	-
citrulline	2132	2R_16575871_SNP	Intergenic	Intergenic	Intergenic		A	C	C	0.1429	5	30	-1.143	6.7386e-10	-
citrulline	2132	3L_6896282_INS	Intergenic	Intergenic	Intergenic		AA	A	A	0.1053	4	34	-1.241	7.0873e-10	(TF_binding_site|BDTNP1_TFBS_dl|FBsf0000305990)
citrulline	2132	X_19998768_SNP	Intergenic	Intergenic	Intergenic		G	T	T	0.1282	5	34	-1.117	7.6024e-10	-
citrulline	2132	3R_8347300_SNP	FBgn0250910	Octbeta3R	INTRON	0	T	G	G	0.1053	4	34	-1.237	9.4175e-10	(TF_binding_site|mE1_TFBS_cad|FBsf0000248209)
citrulline	2132	3L_17339437_SNP	FBgn0036713	Mip	INTRON	0	G	A	A	0.125	5	35	-1.118	1.01412e-09	-
citrulline	2132	3L_17648936_DEL	FBgn0036745	CG7484	DOWNSTREAM	192	A	AATCTAACTAAA	AATCTAACTAAA	0.1053	4	34	-1.227	1.28419e-09	(TF_binding_site|mE1_TFBS_cad|FBsf0000245265)
citrulline	2132	X_6653587_SNP	FBgn0029899	CG14438	INTRON	0	A	G	G	0.125	5	35	-1.119	1.53852e-09	(TF_binding_site|BDTNP1_TFBS_dl|FBsf0000317131);(TF_binding_site|BDTNP1_TFBS_Med|FBsf0000287928);(TF_binding_site|BDTNP1_TFBS_twi|FBsf0000205280);(TF_binding_site|mE1_TFBS_D|FBsf0000238511);(TF_binding_site|mE1_TFBS_HSA|FBsf0000379974);(TF_binding_site|mE1_TFBS_sens|FBsf0000219893)
citrulline	2132	X_6653587_SNP	FBgn0263507	CR43496	UPSTREAM	63	A	G	G	0.125	5	35	-1.119	1.53852e-09	(TF_binding_site|BDTNP1_TFBS_dl|FBsf0000317131);(TF_binding_site|BDTNP1_TFBS_Med|FBsf0000287928);(TF_binding_site|BDTNP1_TFBS_twi|FBsf0000205280);(TF_binding_site|mE1_TFBS_D|FBsf0000238511);(TF_binding_site|mE1_TFBS_HSA|FBsf0000379974);(TF_binding_site|mE1_TFBS_sens|FBsf0000219893)
citrulline	2132	X_6653966_SNP	FBgn0029899	CG14438	INTRON	0	G	T	T	0.125	5	35	-1.119	1.53852e-09	(TF_binding_site|BDTNP1_TFBS_dl|FBsf0000317131);(TF_binding_site|BDTNP1_TFBS_Med|FBsf0000287929);(TF_binding_site|BDTNP1_TFBS_twi|FBsf0000205280);(TF_binding_site|mE1_TFBS_HSA|FBsf0000379974);(TF_binding_site|mE1_TFBS_sens|FBsf0000219893)
citrulline	2132	X_6653966_SNP	FBgn0263507	CR43496	UPSTREAM	442	G	T	T	0.125	5	35	-1.119	1.53852e-09	(TF_binding_site|BDTNP1_TFBS_dl|FBsf0000317131);(TF_binding_site|BDTNP1_TFBS_Med|FBsf0000287929);(TF_binding_site|BDTNP1_TFBS_twi|FBsf0000205280);(TF_binding_site|mE1_TFBS_HSA|FBsf0000379974);(TF_binding_site|mE1_TFBS_sens|FBsf0000219893)
citrulline	2132	X_6656902_SNP	FBgn0029899	CG14438	NON_SYNONYMOUS_CODING	0	G	A	G	0.125	5	35	-1.119	1.53852e-09	(TF_binding_site|mE1_TFBS_sens|FBsf0000219894)
citrulline	2132	X_6657224_SNP	FBgn0029899	CG14438	SYNONYMOUS_CODING	0	A	G	A	0.125	5	35	-1.119	1.53852e-09	(TF_binding_site|mE1_TFBS_HSA|FBsf0000379975);(TF_binding_site|mE1_TFBS_sens|FBsf0000219894)
citrulline	2132	2R_16700559_SNP	Intergenic	Intergenic	Intergenic		C	G	G	0.1	4	36	-1.208	1.67651e-09	-
citrulline	2132	X_6657038_SNP	FBgn0029899	CG14438	SYNONYMOUS_CODING	0	A	G	G	0.1282	5	34	-1.117	1.9317e-09	(TF_binding_site|mE1_TFBS_sens|FBsf0000219894)
citrulline	2132	3R_12750628_MNP	Intergenic	Intergenic	Intergenic		TGC	CTA	CTA	0.1111	4	32	-1.227	1.95676e-09	(TF_binding_site|BDTNP1_TFBS_dl|FBsf0000312328)
citrulline	2132	2L_10073960_SNP	FBgn0265002	CG44153	INTRON	0	T	C	C	0.1	4	36	-1.216	2.52904e-09	-
citrulline	2132	X_877988_DEL	Intergenic	Intergenic	Intergenic		T	CCACCCACGCACCG	CCACCCACGCACCG	0.1026	4	35	-1.218	2.58884e-09	-
citrulline	2132	2L_4278666_SNP	FBgn0031592	Art2	SYNONYMOUS_CODING	0	A	G	G	0.1	4	36	-1.215	2.73307e-09	(TF_binding_site|BDTNP1_TFBS_dl|FBsf0000296568)
citrulline	2132	2R_3731238_SNP	FBgn0085390	Dgk	NON_SYNONYMOUS_CODING	0	G	T	T	0.1	4	36	-1.215	2.73307e-09	(TF_binding_site|mE1_TFBS_chinmo|FBsf0000210816);(TF_binding_site|mE1_TFBS_HSA|FBsf0000354327)
citrulline	2132	2R_3731849_SNP	FBgn0085390	Dgk	INTRON	0	G	T	T	0.1	4	36	-1.215	2.73307e-09	-
citrulline	2132	2R_3733208_SNP	FBgn0085390	Dgk	INTRON	0	T	G	G	0.1	4	36	-1.215	2.73307e-09	-
citrulline	2132	2R_3733233_SNP	FBgn0085390	Dgk	INTRON	0	G	T	T	0.1	4	36	-1.215	2.73307e-09	-
citrulline	2132	2R_5862845_SNP	Intergenic	Intergenic	Intergenic		A	C	A	0.1	4	36	-1.215	2.73307e-09	(regulatory_region|REDfly_CRMs|FBsf0000435778);(TF_binding_site|BDTNP1_TFBS_dl|FBsf0000300996);(TF_binding_site|BDTNP1_TFBS_hb|FBsf0000290030);(TF_binding_site|BDTNP1_TFBS_kni|FBsf0000289637);(TF_binding_site|BDTNP1_TFBS_Med|FBsf0000279729);(TF_binding_site|BDTNP1_TFBS_prd|FBsf0000274298);(TF_binding_site|BDTNP1_TFBS_tll|FBsf0000266790);(TF_binding_site|BDTNP1_TFBS_twi|FBsf0000198902);(TF_binding…
citrulline	2132	2R_5862885_SNP	Intergenic	Intergenic	Intergenic		A	G	A	0.1	4	36	-1.215	2.73307e-09	(regulatory_region|REDfly_CRMs|FBsf0000435778);(TF_binding_site|BDTNP1_TFBS_dl|FBsf0000300996);(TF_binding_site|BDTNP1_TFBS_hb|FBsf0000290030);(TF_binding_site|BDTNP1_TFBS_kni|FBsf0000289637);(TF_binding_site|BDTNP1_TFBS_Med|FBsf0000279729);(TF_binding_site|BDTNP1_TFBS_prd|FBsf0000274298);(TF_binding_site|BDTNP1_TFBS_tll|FBsf0000266790);(TF_binding_site|BDTNP1_TFBS_twi|FBsf0000198902);(TF_binding…
citrulline	2132	X_20002434_SNP	Intergenic	Intergenic	Intergenic		T	C	C	0.1	4	36	-1.215	2.73307e-09	-
citrulline	2132	X_20002437_SNP	Intergenic	Intergenic	Intergenic		G	A	A	0.1	4	36	-1.215	2.73307e-09	-
citrulline	2132	X_15331998_DEL	FBgn0263257	Cngl	INTRON	0	C	CCAGCTATC	CCAGCTATC	0.1026	4	35	-1.207	2.91043e-09	-
citrulline	2132	2L_7575241_SNP	FBgn0264895	RapGAP1	INTRON	0	A	T	T	0.1053	4	34	-1.209	2.94329e-09	(TF_binding_site|BDTNP1_TFBS_dl|FBsf0000297328)
citrulline	2132	2L_11351342_SNP	Intergenic	Intergenic	Intergenic		T	G	G	0.1282	5	34	-1.098	2.9898e-09	(regulatory_region|REDfly_CRMs|FBsf0000435436)
citrulline	2132	2L_11351350_SNP	Intergenic	Intergenic	Intergenic		C	T	T	0.1282	5	34	-1.098	2.9898e-09	(regulatory_region|REDfly_CRMs|FBsf0000435436)
citrulline	2132	2L_11351356_SNP	Intergenic	Intergenic	Intergenic		G	A	A	0.1282	5	34	-1.098	2.9898e-09	(regulatory_region|REDfly_CRMs|FBsf0000435436)
citrulline	2132	2L_1784541_SNP	FBgn0045497	Gr22e	SYNONYMOUS_CODING	0	C	G	G	0.1	4	36	-1.204	3.2096e-09	(TF_binding_site|mE1_TFBS_cad|FBsf0000241125);(TF_binding_site|mE1_TFBS_HSA|FBsf0000344475);(TF_binding_site|mE1_TFBS_sens|FBsf0000215552)
citrulline	2132	2L_1784542_SNP	FBgn0045497	Gr22e	SYNONYMOUS_CODING	0	T	C	C	0.1	4	36	-1.204	3.2096e-09	(TF_binding_site|mE1_TFBS_cad|FBsf0000241125);(TF_binding_site|mE1_TFBS_HSA|FBsf0000344475);(TF_binding_site|mE1_TFBS_sens|FBsf0000215552)
citrulline	2132	3R_4207552_SNP	FBgn0266801	CG45263	DOWNSTREAM	894	T	C	C	0.1	4	36	-1.204	3.2096e-09	-
citrulline	2132	2L_11351327_SNP	Intergenic	Intergenic	Intergenic		C	G	G	0.1282	5	34	-1.094	3.30125e-09	(regulatory_region|REDfly_CRMs|FBsf0000435436)
citrulline	2132	2L_7575150_SNP	FBgn0264895	RapGAP1	INTRON	0	T	A	A	0.1026	4	35	-1.205	3.31291e-09	(TF_binding_site|BDTNP1_TFBS_dl|FBsf0000297328)
citrulline	2132	2R_11472986_SNP	Intergenic	Intergenic	Intergenic		G	A	A	0.1081	4	33	-1.212	3.83844e-09	-
citrulline	2132	3R_8483179_SNP	FBgn0038072	CG6225	INTRON	0	A	G	G	0.1081	4	33	-1.209	4.21e-09	-
citrulline	2132	X_12273592_SNP	Intergenic	Intergenic	Intergenic		A	G	G	0.1	4	36	-1.204	4.21145e-09	-
citrulline	2132	X_14904027_SNP	FBgn0000535	eag	DOWNSTREAM	5	T	A	A	0.1282	5	34	-1.089	4.21228e-09	(TF_binding_site|BDTNP1_TFBS_dl|FBsf0000319130)
citrulline	2132	X_14904027_SNP	FBgn0030600	hiw	DOWNSTREAM	143	T	A	A	0.1282	5	34	-1.089	4.21228e-09	(TF_binding_site|BDTNP1_TFBS_dl|FBsf0000319130)
citrulline	2132	3R_22763541_SNP	FBgn0015541	sda	INTRON	0	T	G	G	0.1143	4	31	-1.218	4.48092e-09	-
citrulline	2132	2L_1879786_SNP	FBgn0051663	CG31663	INTRON	0	A	G	G	0.15	6	34	-1.012	5.25865e-09	-
citrulline	2132	3R_4121263_SNP	FBgn0037565	CG9626	SYNONYMOUS_CODING	0	T	G	G	0.1	4	36	-1.204	5.59045e-09	(TF_binding_site|mE1_TFBS_cad|FBsf0000247889);(TF_binding_site|mE1_TFBS_chinmo|FBsf0000212332);(TF_binding_site|mE1_TFBS_sens|FBsf0000230734)
citrulline	2132	3L_7267921_SNP	FBgn0035756	unc-13-4A	INTRON	0	A	C	C	0.1667	6	30	-1.015	8.97962e-09	-
citrulline	2132	2R_2523644_DEL	FBgn0026761	Trap1	UPSTREAM	53	C	CC	CC	0.1053	4	34	-1.179	1.00809e-08	(TF_binding_site|BDTNP1_TFBS_dl|FBsf0000300278);(TF_binding_site|BDTNP1_TFBS_Med|FBsf0000279368);(TF_binding_site|BDTNP1_TFBS_twi|FBsf0000198577);(TF_binding_site|mE1_TFBS_h|FBsf0000256575);(TF_binding_site|mE1_TFBS_HSA|FBsf0000353839);(TF_binding_site|mE1_TFBS_jumu|FBsf0000254176);(TF_binding_site|mE1_TFBS_sens|FBsf0000226465);(TF_binding_site|mE1_TFBS_Trl|FBsf0000338000);(TF_binding_site|mE1_TF…
citrulline	2132	2R_2523644_DEL	FBgn0042085	Bap170	UPSTREAM	372	C	CC	CC	0.1053	4	34	-1.179	1.00809e-08	(TF_binding_site|BDTNP1_TFBS_dl|FBsf0000300278);(TF_binding_site|BDTNP1_TFBS_Med|FBsf0000279368);(TF_binding_site|BDTNP1_TFBS_twi|FBsf0000198577);(TF_binding_site|mE1_TFBS_h|FBsf0000256575);(TF_binding_site|mE1_TFBS_HSA|FBsf0000353839);(TF_binding_site|mE1_TFBS_jumu|FBsf0000254176);(TF_binding_site|mE1_TFBS_sens|FBsf0000226465);(TF_binding_site|mE1_TFBS_Trl|FBsf0000338000);(TF_binding_site|mE1_TF…
citrulline	2132	2R_11472597_SNP	Intergenic	Intergenic	Intergenic		G	A	A	0.1053	4	34	-1.175	1.12406e-08	-
citrulline	2132	3R_4038886_SNP	Intergenic	Intergenic	Intergenic		A	T	T	0.1282	5	34	-1.077	1.2202e-08	(TF_binding_site|BDTNP1_TFBS_slp1|FBsf0000272892);(TF_binding_site|mE1_TFBS_cnc|FBsf0000206605)
citrulline	2132	2R_11476975_SNP	Intergenic	Intergenic	Intergenic		T	A	A	0.1	4	36	-1.169	1.34081e-08	-
citrulline	2132	2R_11477133_SNP	Intergenic	Intergenic	Intergenic		C	T	T	0.1	4	36	-1.169	1.34081e-08	-
citrulline	2132	2R_11477134_SNP	Intergenic	Intergenic	Intergenic		T	C	C	0.1	4	36	-1.169	1.34081e-08	-
citrulline	2132	2R_17973132_SNP	FBgn0034692	CG13502	DOWNSTREAM	155	C	A	A	0.1	4	36	-1.169	1.34081e-08	-
citrulline	2132	2R_17973132_SNP	FBgn0034691	Synj	DOWNSTREAM	206	C	A	A	0.1	4	36	-1.169	1.34081e-08	-
citrulline	2132	2R_11473590_SNP	Intergenic	Intergenic	Intergenic		C	G	G	0.1026	4	35	-1.17	1.39423e-08	-
citrulline	2132	3L_4339379_SNP	FBgn0035533	Cip4	INTRON	0	C	A	A	0.125	5	35	-1.052	1.41364e-08	-
citrulline	2132	3L_4339380_SNP	FBgn0035533	Cip4	INTRON	0	T	A	A	0.125	5	35	-1.052	1.41364e-08	-
citrulline	2132	3R_17261216_SNP	FBgn0264898	CR44089	DOWNSTREAM	857	A	C	C	0.1316	5	33	-1.079	1.46365e-08	(TF_binding_site|BDTNP1_TFBS_da|FBsf0000329999);(TF_binding_site|BDTNP1_TFBS_dl|FBsf0000313166);(TF_binding_site|BDTNP1_TFBS_prd|FBsf0000276723)
citrulline	2132	3R_3151152_SNP	FBgn0265423	CG44335	UPSTREAM	167	C	G	G	0.1	4	36	-1.177	1.5525e-08	-
citrulline	2132	3R_3151154_SNP	FBgn0265423	CG44335	UPSTREAM	165	C	T	T	0.1	4	36	-1.177	1.5525e-08	-
citrulline	2132	3R_3151155_SNP	FBgn0265423	CG44335	UPSTREAM	164	A	G	G	0.1	4	36	-1.177	1.5525e-08	-
citrulline	2132	3R_4038975_SNP	Intergenic	Intergenic	Intergenic		T	G	G	0.125	5	35	-1.07	1.61619e-08	(TF_binding_site|BDTNP1_TFBS_slp1|FBsf0000272892);(TF_binding_site|mE1_TFBS_cnc|FBsf0000206605);(TF_binding_site|mE1_TFBS_HSA|FBsf0000369503)
citrulline	2132	2R_12851398_SNP	FBgn0265526	CR44376	UPSTREAM	402	C	A	A	0.1026	4	35	-1.172	1.64195e-08	-
citrulline	2132	2R_3687884_SNP	FBgn0002891	mus205	NON_SYNONYMOUS_CODING	0	A	G	G	0.1	4	36	-1.177	1.72309e-08	(TF_binding_site|mE1_TFBS_cad|FBsf0000246015);(TF_binding_site|mE1_TFBS_chinmo|FBsf0000210810)
citrulline	2132	2R_3687884_SNP	FBgn0033224	Nop17l	DOWNSTREAM	406	A	G	G	0.1	4	36	-1.177	1.72309e-08	(TF_binding_site|mE1_TFBS_cad|FBsf0000246015);(TF_binding_site|mE1_TFBS_chinmo|FBsf0000210810)
citrulline	2132	2R_3687906_SNP	FBgn0002891	mus205	NON_SYNONYMOUS_CODING	0	T	G	G	0.1	4	36	-1.177	1.72309e-08	(TF_binding_site|mE1_TFBS_cad|FBsf0000246015);(TF_binding_site|mE1_TFBS_chinmo|FBsf0000210810)
citrulline	2132	2R_3687906_SNP	FBgn0033224	Nop17l	DOWNSTREAM	384	T	G	G	0.1	4	36	-1.177	1.72309e-08	(TF_binding_site|mE1_TFBS_cad|FBsf0000246015);(TF_binding_site|mE1_TFBS_chinmo|FBsf0000210810)
citrulline	2132	3L_11674427_SNP	FBgn0015828	TfIIEalpha	UPSTREAM	711	T	C	T	0.1	4	36	-1.177	1.72309e-08	(TF_binding_site|BDTNP1_TFBS_dl|FBsf0000306919);(TF_binding_site|mE1_TFBS_HSA|FBsf0000364305)
citrulline	2132	3L_11674427_SNP	FBgn0052085	CG32085	UPSTREAM	983	T	C	T	0.1	4	36	-1.177	1.72309e-08	(TF_binding_site|BDTNP1_TFBS_dl|FBsf0000306919);(TF_binding_site|mE1_TFBS_HSA|FBsf0000364305)
citrulline	2132	3L_3843493_SNP	Intergenic	Intergenic	Intergenic		C	T	T	0.1	4	36	-1.177	1.72309e-08	(TF_binding_site|BDTNP1_TFBS_Med|FBsf0000282100);(TF_binding_site|BDTNP1_TFBS_sna|FBsf0000269083);(TF_binding_site|mE1_TFBS_cad|FBsf0000244172);(TF_binding_site|mE1_TFBS_HSA|FBsf0000361928);(TF_binding_site|mE1_TFBS_sens|FBsf0000222860)
citrulline	2132	3R_6385621_SNP	FBgn0001235	hth	INTRON	0	C	G	G	0.125	5	35	-1.064	1.87448e-08	(TF_binding_site|BDTNP1_TFBS_dl|FBsf0000310935)
citrulline	2132	2R_11477200_SNP	Intergenic	Intergenic	Intergenic		A	C	C	0.1026	4	35	-1.163	1.89199e-08	-
citrulline	2132	2R_2523384_SNP	FBgn0026761	Trap1	NON_SYNONYMOUS_CODING	0	G	T	T	0.1579	6	32	-0.9879	1.89615e-08	(TF_binding_site|BDTNP1_TFBS_dl|FBsf0000300278);(TF_binding_site|BDTNP1_TFBS_Med|FBsf0000279368);(TF_binding_site|BDTNP1_TFBS_twi|FBsf0000198577);(TF_binding_site|mE1_TFBS_HSA|FBsf0000353839);(TF_binding_site|mE1_TFBS_sens|FBsf0000226465);(TF_binding_site|mE1_TFBS_Trl|FBsf0000338000);(TF_binding_site|mE1_TFBS_Ubx|FBsf0000262954)
citrulline	2132	2R_2523384_SNP	FBgn0042085	Bap170	UPSTREAM	633	G	T	T	0.1579	6	32	-0.9879	1.89615e-08	(TF_binding_site|BDTNP1_TFBS_dl|FBsf0000300278);(TF_binding_site|BDTNP1_TFBS_Med|FBsf0000279368);(TF_binding_site|BDTNP1_TFBS_twi|FBsf0000198577);(TF_binding_site|mE1_TFBS_HSA|FBsf0000353839);(TF_binding_site|mE1_TFBS_sens|FBsf0000226465);(TF_binding_site|mE1_TFBS_Trl|FBsf0000338000);(TF_binding_site|mE1_TFBS_Ubx|FBsf0000262954)
citrulline	2132	3R_6033898_SNP	FBgn0004575	Syn	INTRON	0	T	C	C	0.1081	4	33	-1.163	2.05658e-08	-
citrulline	2132	3R_6033898_SNP	FBgn0025879	Timp	INTRON	0	T	C	C	0.1081	4	33	-1.163	2.05658e-08	-
citrulline	2132	3R_4085838_SNP	FBgn0260386	mtg	NON_SYNONYMOUS_CODING	0	A	C	C	0.1282	5	34	-1.049	2.23849e-08	(TF_binding_site|mE1_TFBS_cad|FBsf0000247884)
citrulline	2132	3R_4085838_SNP	FBgn0037560	CR18228	DOWNSTREAM	590	A	C	C	0.1282	5	34	-1.049	2.23849e-08	(TF_binding_site|mE1_TFBS_cad|FBsf0000247884)
citrulline	2132	3R_4085839_SNP	FBgn0260386	mtg	NON_SYNONYMOUS_CODING	0	G	A	A	0.1282	5	34	-1.049	2.23849e-08	(TF_binding_site|mE1_TFBS_cad|FBsf0000247884)
citrulline	2132	3R_4085839_SNP	FBgn0037560	CR18228	DOWNSTREAM	589	G	A	A	0.1282	5	34	-1.049	2.23849e-08	(TF_binding_site|mE1_TFBS_cad|FBsf0000247884)
citrulline	2132	3L_22926125_SNP	Intergenic	Intergenic	Intergenic		A	T	T	0.1053	4	34	-1.156	3.00736e-08	(transposable_element|FlyBase|FBti0060780)
cysteinylglycine	35637	2L_1428514_SNP	FBgn0263320	CG43401	UTR_5_PRIME	0	T	A	A	0.1026	4	35	-0.874	9.6495e-11	(TF_binding_site|mE1_TFBS_cad|FBsf0000241106)
cysteinylglycine	35637	2L_10713814_SNP	Intergenic	Intergenic	Intergenic		A	T	T	0.1	4	36	-0.8715	1.0751e-10	-
cysteinylglycine	35637	3R_25797946_SNP	Intergenic	Intergenic	Intergenic		G	T	G	0.1026	4	35	-0.8714	1.2235e-10	-
cysteinylglycine	35637	2L_17717570_SNP	FBgn0015609	CadN	INTRON	0	C	G	G	0.1026	4	35	-0.8564	4.3702e-10	-
cysteinylglycine	35637	2R_19426870_SNP	FBgn0050181	ppk3	INTRON	0	T	G	G	0.1026	4	35	-0.8553	4.7665e-10	(TF_binding_site|BDTNP1_TFBS_da|FBsf0000325250);(TF_binding_site|mE1_TFBS_cad|FBsf0000247349);(TF_binding_site|mE1_TFBS_chinmo|FBsf0000211907);(TF_binding_site|mE1_TFBS_HSA|FBsf0000359815)
cysteinylglycine	35637	2R_19426870_SNP	FBgn0000241	bw	UPSTREAM	848	T	G	G	0.1026	4	35	-0.8553	4.7665e-10	(TF_binding_site|BDTNP1_TFBS_da|FBsf0000325250);(TF_binding_site|mE1_TFBS_cad|FBsf0000247349);(TF_binding_site|mE1_TFBS_chinmo|FBsf0000211907);(TF_binding_site|mE1_TFBS_HSA|FBsf0000359815)
cysteinylglycine	35637	2R_19428955_SNP	FBgn0041233	Gr59e	INTRON	0	G	A	A	0.1	4	36	-0.8516	5.8463e-10	(TF_binding_site|mE1_TFBS_cad|FBsf0000247349)
cysteinylglycine	35637	2R_19428955_SNP	FBgn0050181	ppk3	UPSTREAM	659	G	A	A	0.1	4	36	-0.8516	5.8463e-10	(TF_binding_site|mE1_TFBS_cad|FBsf0000247349)
cysteinylglycine	35637	2R_19428958_SNP	FBgn0041233	Gr59e	INTRON	0	G	A	A	0.1	4	36	-0.8516	5.8463e-10	(TF_binding_site|mE1_TFBS_cad|FBsf0000247349)
cysteinylglycine	35637	2R_19428958_SNP	FBgn0050181	ppk3	UPSTREAM	662	G	A	A	0.1	4	36	-0.8516	5.8463e-10	(TF_binding_site|mE1_TFBS_cad|FBsf0000247349)
cysteinylglycine	35637	2L_17595087_SNP	FBgn0261089	Sytalpha	INTRON	0	T	C	C	0.1	4	36	-0.8455	9.4691e-10	-
cysteinylglycine	35637	3R_25614284_SNP	FBgn0001297	kay	INTRON	0	T	C	C	0.1	4	36	-0.8455	9.4691e-10	-
cysteinylglycine	35637	2L_17739964_SNP	FBgn0015609	CadN	INTRON	0	G	C	C	0.1111	4	32	-0.847	1.26146e-09	(TF_binding_site|BDTNP1_TFBS_da|FBsf0000322717);(TF_binding_site|BDTNP1_TFBS_dl|FBsf0000299110);(TF_binding_site|BDTNP1_TFBS_gt|FBsf0000293274);(TF_binding_site|BDTNP1_TFBS_hb|FBsf0000290894);(TF_binding_site|BDTNP1_TFBS_Med|FBsf0000278808);(TF_binding_site|BDTNP1_TFBS_twi|FBsf0000201969);(TF_binding_site|mE1_TFBS_cad|FBsf0000242300);(TF_binding_site|mE1_TFBS_HSA|FBsf0000351958)
cysteinylglycine	35637	3L_14190794_SNP	FBgn0013718	nuf	INTRON	0	G	T	T	0.1026	4	35	-0.8411	1.45511e-09	(TF_binding_site|BDTNP1_TFBS_twi|FBsf0000203779)
cysteinylglycine	35637	2R_1467968_SNP	Intergenic	Intergenic	Intergenic		G	A	A	0.125	4	28	-0.8443	2.53627e-09	-
cysteinylglycine	35637	3L_13233034_SNP	FBgn0023095	caps	INTRON	0	A	G	G	0.1	4	36	-0.8303	2.9716e-09	(TF_binding_site|mE1_TFBS_cad|FBsf0000244908)
cysteinylglycine	35637	3L_13233037_SNP	FBgn0023095	caps	INTRON	0	T	A	A	0.1	4	36	-0.8303	2.9716e-09	(TF_binding_site|mE1_TFBS_cad|FBsf0000244908)
cysteinylglycine	35637	3L_13233077_SNP	FBgn0023095	caps	INTRON	0	T	A	A	0.1	4	36	-0.8303	2.9716e-09	(TF_binding_site|mE1_TFBS_cad|FBsf0000244908)
cysteinylglycine	35637	3L_13233082_SNP	FBgn0023095	caps	INTRON	0	A	T	T	0.1	4	36	-0.8303	2.9716e-09	(TF_binding_site|mE1_TFBS_cad|FBsf0000244908)
cysteinylglycine	35637	3L_13233280_SNP	FBgn0023095	caps	INTRON	0	C	G	G	0.1	4	36	-0.8303	2.9716e-09	-
cysteinylglycine	35637	3L_13233383_DEL	FBgn0023095	caps	INTRON	0	C	TAAATTTCCGCTGTTTA	TAAATTTCCGCTGTTTA	0.1	4	36	-0.8303	2.9716e-09	-
cysteinylglycine	35637	3L_13233402_SNP	FBgn0023095	caps	INTRON	0	A	G	G	0.1	4	36	-0.8303	2.9716e-09	-
cysteinylglycine	35637	3L_13234003_SNP	FBgn0023095	caps	INTRON	0	C	T	T	0.1	4	36	-0.8303	2.9716e-09	-
cysteinylglycine	35637	3L_3499429_DEL	FBgn0259224	CG42324	INTRON	0	C	CA	CA	0.1316	5	33	-0.7459	8.44484e-09	-
cysteinylglycine	35637	X_17932568_SNP	FBgn0003380	Sh	INTRON	0	T	C	C	0.1	4	36	-0.815	8.62603e-09	-
cysteinylglycine	35637	X_18287165_SNP	FBgn0052549	CG32549	INTRON	0	T	G	G	0.1143	4	31	-0.8215	8.62848e-09	-
cysteinylglycine	35637	2R_13773887_SNP	FBgn0011589	Elk	INTRON	0	T	A	A	0.1143	4	31	-0.815	1.32749e-08	-
cysteinylglycine	35637	2R_13773887_SNP	FBgn0261362	PPO1	DOWNSTREAM	838	T	A	A	0.1143	4	31	-0.815	1.32749e-08	-
cysteinylglycine	35637	2L_6271000_SNP	FBgn0053531	Ddr	INTRON	0	T	A	A	0.1	4	36	-0.8074	1.41876e-08	-
cysteinylglycine	35637	2L_6271000_SNP	FBgn0261699	CR42735	UPSTREAM	24	T	A	A	0.1	4	36	-0.8074	1.41876e-08	-
cysteinylglycine	35637	2L_6271039_SNP	FBgn0053531	Ddr	INTRON	0	G	A	A	0.1	4	36	-0.8074	1.41876e-08	-
cysteinylglycine	35637	2L_6271039_SNP	FBgn0261699	CR42735	EXON	0	G	A	A	0.1	4	36	-0.8074	1.41876e-08	-
cysteinylglycine	35637	2R_19415243_SNP	FBgn0261786	mi	UTR_3_PRIME	0	A	T	T	0.1	4	36	-0.8074	1.41876e-08	(TF_binding_site|BDTNP1_TFBS_da|FBsf0000325249);(TF_binding_site|BDTNP1_TFBS_dl|FBsf0000304107);(TF_binding_site|BDTNP1_TFBS_Med|FBsf0000281373);(TF_binding_site|BDTNP1_TFBS_twi|FBsf0000200252);(TF_binding_site|mE1_TFBS_cad|FBsf0000247348);(TF_binding_site|mE1_TFBS_HSA|FBsf0000359813)
cysteinylglycine	35637	2R_19415243_SNP	FBgn0000241	bw	DOWNSTREAM	85	A	T	T	0.1	4	36	-0.8074	1.41876e-08	(TF_binding_site|BDTNP1_TFBS_da|FBsf0000325249);(TF_binding_site|BDTNP1_TFBS_dl|FBsf0000304107);(TF_binding_site|BDTNP1_TFBS_Med|FBsf0000281373);(TF_binding_site|BDTNP1_TFBS_twi|FBsf0000200252);(TF_binding_site|mE1_TFBS_cad|FBsf0000247348);(TF_binding_site|mE1_TFBS_HSA|FBsf0000359813)
cysteinylglycine	35637	2R_19415265_SNP	FBgn0261786	mi	UTR_3_PRIME	0	A	T	T	0.1	4	36	-0.8074	1.41876e-08	(TF_binding_site|BDTNP1_TFBS_da|FBsf0000325249);(TF_binding_site|BDTNP1_TFBS_dl|FBsf0000304107);(TF_binding_site|BDTNP1_TFBS_Med|FBsf0000281373);(TF_binding_site|BDTNP1_TFBS_twi|FBsf0000200252);(TF_binding_site|mE1_TFBS_cad|FBsf0000247348);(TF_binding_site|mE1_TFBS_HSA|FBsf0000359813)
cysteinylglycine	35637	2R_19415265_SNP	FBgn0000241	bw	DOWNSTREAM	63	A	T	T	0.1	4	36	-0.8074	1.41876e-08	(TF_binding_site|BDTNP1_TFBS_da|FBsf0000325249);(TF_binding_site|BDTNP1_TFBS_dl|FBsf0000304107);(TF_binding_site|BDTNP1_TFBS_Med|FBsf0000281373);(TF_binding_site|BDTNP1_TFBS_twi|FBsf0000200252);(TF_binding_site|mE1_TFBS_cad|FBsf0000247348);(TF_binding_site|mE1_TFBS_HSA|FBsf0000359813)
cysteinylglycine	35637	2L_2871798_SNP	FBgn0051694	CG31694	INTRON	0	T	C	C	0.1	4	36	-0.8068	1.47771e-08	(TF_binding_site|mE1_TFBS_cad|FBsf0000241202)
cysteinylglycine	35637	2L_2872018_SNP	FBgn0051694	CG31694	INTRON	0	A	T	T	0.1	4	36	-0.8068	1.47771e-08	-
cysteinylglycine	35637	2L_2872108_SNP	FBgn0051694	CG31694	INTRON	0	A	G	G	0.1	4	36	-0.8068	1.47771e-08	-
cysteinylglycine	35637	3L_10510351_SNP	FBgn0052062	A2bp1	INTRON	0	T	A	A	0.1	4	36	-0.8058	1.58484e-08	(TF_binding_site|BDTNP1_TFBS_da|FBsf0000326565);(TF_binding_site|BDTNP1_TFBS_dl|FBsf0000306667);(TF_binding_site|BDTNP1_TFBS_hb|FBsf0000291310);(TF_binding_site|BDTNP1_TFBS_Med|FBsf0000282685);(TF_binding_site|BDTNP1_TFBS_twi|FBsf0000203404);(TF_binding_site|BDTNP1_TFBS_z|FBsf0000197097);(TF_binding_site|mE1_TFBS_cad|FBsf0000244676);(TF_binding_site|mE1_TFBS_HSA|FBsf0000363938);(TF_binding_site|m…
cysteinylglycine	35637	3L_13235473_SNP	FBgn0023095	caps	INTRON	0	G	C	C	0.1111	4	32	-0.8086	1.8218e-08	-
cysteinylglycine	35637	2L_2869740_SNP	FBgn0051694	CG31694	INTRON	0	T	A	A	0.1026	4	35	-0.8026	2.08008e-08	(TF_binding_site|mE1_TFBS_cad|FBsf0000241202)
cysteinylglycine	35637	2L_2869740_SNP	FBgn0031476	CG8813	UTR_5_PRIME	0	T	A	A	0.1026	4	35	-0.8026	2.08008e-08	(TF_binding_site|mE1_TFBS_cad|FBsf0000241202)
cysteinylglycine	35637	2L_2873165_SNP	FBgn0051694	CG31694	INTRON	0	T	G	G	0.1026	4	35	-0.8026	2.08008e-08	(TF_binding_site|BDTNP1_TFBS_da|FBsf0000321200);(TF_binding_site|BDTNP1_TFBS_dl|FBsf0000296286);(TF_binding_site|BDTNP1_TFBS_Med|FBsf0000277333);(TF_binding_site|BDTNP1_TFBS_prd|FBsf0000274759);(TF_binding_site|BDTNP1_TFBS_twi|FBsf0000200667);(TF_binding_site|mE1_TFBS_HSA|FBsf0000344788)
cysteinylglycine	35637	3L_1061202_SNP	FBgn0004870	bab1	INTRON	0	C	G	C	0.1053	4	34	-0.8008	2.5178e-08	-
cytosine	573	3L_10389082_INS	Intergenic	Intergenic	Intergenic		GAACTAATGT	A	A	0.1	4	36	-1.351	1.9976e-10	-
cytosine	573	3R_26689611_SNP	Intergenic	Intergenic	Intergenic		A	G	G	0.1	4	36	-1.351	1.9976e-10	-
cytosine	573	2R_17991875_SNP	FBgn0034694	CG6613	SYNONYMOUS_CODING	0	A	G	G	0.1	4	36	-1.311	1.60588e-09	(TF_binding_site|mE1_TFBS_sens|FBsf0000229334)
cytosine	573	X_18219566_SNP	FBgn0030913	CG6123	UTR_3_PRIME	0	C	T	T	0.1282	5	34	-1.188	1.87795e-09	-
cytosine	573	3L_6650997_SNP	Intergenic	Intergenic	Intergenic		T	G	T	0.1053	4	34	-1.306	2.36986e-09	-
cytosine	573	2R_9072821_DEL	FBgn0033802	CG17724	INTRON	0	T	TT	TT	0.1053	4	34	-1.294	4.20562e-09	(TF_binding_site|mE1_TFBS_HSA|FBsf0000356254);(TF_binding_site|mE1_TFBS_sens|FBsf0000227757)
cytosine	573	2R_9072821_DEL	FBgn0028991	seq	INTRON	0	T	TT	TT	0.1053	4	34	-1.294	4.20562e-09	(TF_binding_site|mE1_TFBS_HSA|FBsf0000356254);(TF_binding_site|mE1_TFBS_sens|FBsf0000227757)
cytosine	573	2R_9072821_DEL	FBgn0053182	Kdm4B	DOWNSTREAM	217	T	TT	TT	0.1053	4	34	-1.294	4.20562e-09	(TF_binding_site|mE1_TFBS_HSA|FBsf0000356254);(TF_binding_site|mE1_TFBS_sens|FBsf0000227757)
cytosine	573	2L_1753221_SNP	FBgn0031364	CG17648	DOWNSTREAM	373	T	C	C	0.1026	4	35	-1.29	4.50273e-09	(TF_binding_site|BDTNP1_TFBS_twi|FBsf0000200594)
cytosine	573	X_7720141_SNP	FBgn0029962	CG1402	UPSTREAM	89	T	C	C	0.1053	4	34	-1.292	4.58926e-09	(TF_binding_site|BDTNP1_TFBS_dl|FBsf0000317465);(TF_binding_site|BDTNP1_TFBS_Med|FBsf0000288069);(TF_binding_site|mE1_TFBS_HSA|FBsf0000380369)
cytosine	573	2L_5900988_SNP	FBgn0265790	CR44579	UPSTREAM	608	C	T	T	0.1	4	36	-1.288	4.67263e-09	-
cytosine	573	2R_9503616_SNP	Intergenic	Intergenic	Intergenic		A	G	G	0.1	4	36	-1.288	4.67263e-09	(TF_binding_site|BDTNP1_TFBS_twi|FBsf0000199284)
cytosine	573	2R_9250107_SNP	FBgn0266851	CR45312	EXON	0	G	C	C	0.1053	4	34	-1.288	5.43991e-09	(TF_binding_site|BDTNP1_TFBS_dl|FBsf0000301862);(TF_binding_site|mE1_TFBS_chinmo|FBsf0000211210);(TF_binding_site|mE1_TFBS_HSA|FBsf0000356305)
cytosine	573	X_18221469_SNP	FBgn0030913	CG6123	SYNONYMOUS_CODING	0	A	G	G	0.1053	4	34	-1.275	8.36458e-09	(TF_binding_site|BDTNP1_TFBS_sna|FBsf0000270412);(TF_binding_site|BDTNP1_TFBS_twi|FBsf0000263635);(TF_binding_site|mE1_TFBS_chinmo|FBsf0000209127)
cytosine	573	3L_19639743_SNP	FBgn0022774	Oat	DOWNSTREAM	637	T	G	G	0.1	4	36	-1.271	9.82556e-09	-
cytosine	573	3L_19639753_INS	FBgn0022774	Oat	DOWNSTREAM	627	TCCTTGAAAGGTGAG	C	C	0.1	4	36	-1.271	9.82556e-09	-
cytosine	573	2R_1013085_DEL	FBgn0026238	gus	INTRON	0	G	GTTAG	GTTAG	0.1081	4	33	-1.276	9.95218e-09	-
cytosine	573	3R_26689363_SNP	Intergenic	Intergenic	Intergenic		T	C	C	0.1026	4	35	-1.272	1.0091e-08	-
cytosine	573	2L_2516885_SNP	FBgn0031430	CG3528	DOWNSTREAM	217	A	C	C	0.1111	4	32	-1.27	1.02632e-08	-
cytosine	573	3L_19639401_INS	FBgn0022774	Oat	DOWNSTREAM	979	ATTCTC	G	G	0.1026	4	35	-1.271	1.06162e-08	-
cytosine	573	2L_15361604_INS	FBgn0032563	CG15258	UTR_5_PRIME	0	TCAGAA	T	T	0.1026	4	35	-1.269	1.13669e-08	(TF_binding_site|mE1_TFBS_HSA|FBsf0000351360)
cytosine	573	3R_26689176_SNP	Intergenic	Intergenic	Intergenic		T	G	G	0.125	5	35	-1.149	1.17487e-08	-
cytosine	573	3R_26689205_SNP	Intergenic	Intergenic	Intergenic		T	A	A	0.125	5	35	-1.149	1.17487e-08	-
cytosine	573	3L_6155081_SNP	FBgn0035686	Cpr65Az	DOWNSTREAM	392	A	C	C	0.1579	6	32	-1.061	1.71259e-08	(TF_binding_site|BDTNP1_TFBS_twi|FBsf0000203053)
cytosine	573	3L_6155081_SNP	FBgn0267308	CR45744	DOWNSTREAM	714	A	C	C	0.1579	6	32	-1.061	1.71259e-08	(TF_binding_site|BDTNP1_TFBS_twi|FBsf0000203053)
cytosine	573	X_18222051_SNP	FBgn0030913	CG6123	SYNONYMOUS_CODING	0	G	A	A	0.1053	4	34	-1.26	1.79265e-08	(TF_binding_site|BDTNP1_TFBS_sna|FBsf0000270412);(TF_binding_site|BDTNP1_TFBS_twi|FBsf0000263635)
cytosine	573	3L_479734_SNP	FBgn0001316	klar	INTRON	0	A	C	C	0.1026	4	35	-1.256	1.90803e-08	-
cytosine	573	X_18218235_SNP	FBgn0030913	CG6123	DOWNSTREAM	43	T	C	C	0.1026	4	35	-1.256	1.90803e-08	-
cytosine	573	X_18215848_SNP	FBgn0030912	CG6023	UPSTREAM	622	A	C	C	0.1	4	36	-1.254	1.99626e-08	(TF_binding_site|BDTNP1_TFBS_dl|FBsf0000320062);(TF_binding_site|mE1_TFBS_bab1|FBsf0000215100);(TF_binding_site|mE1_TFBS_HSA|FBsf0000349164);(TF_binding_site|mE1_TFBS_inv|FBsf0000235549);(TF_binding_site|mE1_TFBS_sens|FBsf0000221545)
cytosine	573	X_18217553_SNP	FBgn0030913	CG6123	DOWNSTREAM	725	T	A	A	0.1	4	36	-1.254	1.99626e-08	(TF_binding_site|mE1_TFBS_HSA|FBsf0000349165)
cytosine	573	3L_470924_SNP	FBgn0001316	klar	INTRON	0	G	T	T	0.1026	4	35	-1.245	2.75409e-08	-
cytosine	573	3L_481155_SNP	FBgn0001316	klar	INTRON	0	A	C	C	0.1026	4	35	-1.245	2.75409e-08	(TF_binding_site|mE1_TFBS_cad|FBsf0000243877)
cytosine	573	X_18216118_SNP	FBgn0030913	CG6123	DOWNSTREAM	873	G	C	C	0.1026	4	35	-1.245	2.99392e-08	(TF_binding_site|BDTNP1_TFBS_dl|FBsf0000320062);(TF_binding_site|mE1_TFBS_bab1|FBsf0000215100);(TF_binding_site|mE1_TFBS_inv|FBsf0000235549)
cytosine	573	X_18216118_SNP	FBgn0030912	CG6023	UPSTREAM	892	G	C	C	0.1026	4	35	-1.245	2.99392e-08	(TF_binding_site|BDTNP1_TFBS_dl|FBsf0000320062);(TF_binding_site|mE1_TFBS_bab1|FBsf0000215100);(TF_binding_site|mE1_TFBS_inv|FBsf0000235549)
dimethylarginine (SDMA + ADMA)	36808	X_8354684_SNP	FBgn0030040	CG15347	INTRON	0	A	T	T	0.1282	5	34	-0.2956	2.82387e-08	-
dimethylarginine (SDMA + ADMA)	36808	X_8354684_SNP	FBgn0023506	Es2	UPSTREAM	828	A	T	T	0.1282	5	34	-0.2956	2.82387e-08	-
dodecanedioate	32388	2L_17681153_SNP	FBgn0015609	CadN	INTRON	0	T	A	A	0.1026	4	35	-0.5281	1.61794e-09	-
dodecanedioate	32388	2L_17682044_SNP	FBgn0015609	CadN	INTRON	0	T	G	G	0.1026	4	35	-0.5281	1.61794e-09	-
dodecanedioate	32388	2L_17662314_SNP	FBgn0015609	CadN	INTRON	0	T	G	G	0.1	4	36	-0.5253	2.0831e-09	-
dodecanedioate	32388	2L_17664090_SNP	FBgn0015609	CadN	SYNONYMOUS_CODING	0	C	T	T	0.1	4	36	-0.5253	2.0831e-09	-
dodecanedioate	32388	2L_17680443_SNP	FBgn0015609	CadN	INTRON	0	T	A	A	0.1	4	36	-0.5253	2.0831e-09	-
dodecanedioate	32388	2L_17680553_SNP	FBgn0015609	CadN	INTRON	0	C	G	G	0.1	4	36	-0.5253	2.0831e-09	-
dodecanedioate	32388	2L_17681904_SNP	FBgn0015609	CadN	INTRON	0	G	A	A	0.1	4	36	-0.5253	2.0831e-09	-
dodecanedioate	32388	2L_17681915_SNP	FBgn0015609	CadN	INTRON	0	C	A	A	0.1	4	36	-0.5253	2.0831e-09	-
dodecanedioate	32388	2L_17680637_SNP	FBgn0015609	CadN	INTRON	0	A	G	G	0.1026	4	35	-0.5221	3.38206e-09	-
dodecanedioate	32388	2L_17668728_SNP	FBgn0015609	CadN	INTRON	0	T	C	C	0.1282	5	34	-0.4739	4.38464e-09	-
dodecanedioate	32388	2R_6083253_SNP	Intergenic	Intergenic	Intergenic		G	T	T	0.1282	5	34	-0.4683	8.44541e-09	(TF_binding_site|BDTNP1_TFBS_dl|FBsf0000301064);(TF_binding_site|BDTNP1_TFBS_z|FBsf0000196453)
dodecanedioate	32388	2R_4907765_SNP	FBgn0033365	CG8170	SYNONYMOUS_CODING	0	A	T	T	0.1026	4	35	-0.5125	9.23105e-09	(TF_binding_site|BDTNP1_TFBS_sna|FBsf0000267555);(TF_binding_site|mE1_TFBS_chinmo|FBsf0000210955);(TF_binding_site|mE1_TFBS_HSA|FBsf0000354769);(TF_binding_site|mE1_TFBS_HSA|FBsf0000354770)
dodecanedioate	32388	3L_11363661_SNP	Intergenic	Intergenic	Intergenic		T	A	A	0.1026	4	35	-0.5105	1.14131e-08	-
dodecanedioate	32388	2L_17672873_SNP	FBgn0015609	CadN	INTRON	0	T	G	G	0.1316	5	33	-0.4649	1.34031e-08	-
dodecanedioate	32388	3L_4346365_SNP	FBgn0035533	Cip4	INTRON	0	T	C	C	0.1282	5	34	-0.4591	1.62212e-08	-
dodecanedioate	32388	3L_4346365_SNP	FBgn0266649	CR45156	INTRON	0	T	C	C	0.1282	5	34	-0.4591	1.62212e-08	-
dodecanedioate	32388	3L_4346369_SNP	FBgn0266649	CR45156	INTRON	0	T	A	A	0.1282	5	34	-0.4591	1.62212e-08	-
dodecanedioate	32388	3L_4346369_SNP	FBgn0035533	Cip4	INTRON	0	T	A	A	0.1282	5	34	-0.4591	1.62212e-08	-
dodecanedioate	32388	2L_17647422_SNP	FBgn0015609	CadN	UTR_3_PRIME	0	T	A	A	0.1316	5	33	-0.4598	2.30164e-08	-
dodecanedioate	32388	2R_6083242_SNP	Intergenic	Intergenic	Intergenic		A	G	G	0.1515	5	28	-0.4645	2.44761e-08	(TF_binding_site|BDTNP1_TFBS_dl|FBsf0000301064);(TF_binding_site|BDTNP1_TFBS_z|FBsf0000196453)
ergothioneine	37459	2L_11426788_SNP	Intergenic	Intergenic	Intergenic		T	G	G	0.2308	9	30	-0.522	3.26944e-09	-
ergothioneine	37459	X_11254175_SNP	FBgn0030294	Pa1	UTR_3_PRIME	0	G	A	A	0.1282	5	34	-0.6426	9.98344e-09	-
ergothioneine	37459	X_11254175_SNP	FBgn0004864	hop	DOWNSTREAM	788	G	A	A	0.1282	5	34	-0.6426	9.98344e-09	-
fumarate	1643	3L_13372976_SNP	FBgn0036350	CG14111	INTRON	0	G	A	A	0.3077	12	27	-0.1236	1.66889e-08	(TF_binding_site|BDTNP1_TFBS_dl|FBsf0000307229);(TF_binding_site|BDTNP1_TFBS_twi|FBsf0000203701)
fumarate	1643	3L_13372976_SNP	FBgn0036351	CG14107	DOWNSTREAM	483	G	A	A	0.3077	12	27	-0.1236	1.66889e-08	(TF_binding_site|BDTNP1_TFBS_dl|FBsf0000307229);(TF_binding_site|BDTNP1_TFBS_twi|FBsf0000203701)
fumarate	1643	3L_13372976_SNP	FBgn0036349	SNCF	DOWNSTREAM	686	G	A	A	0.3077	12	27	-0.1236	1.66889e-08	(TF_binding_site|BDTNP1_TFBS_dl|FBsf0000307229);(TF_binding_site|BDTNP1_TFBS_twi|FBsf0000203701)
gamma-glutamylglutamine	2730	2L_14530503_SNP	FBgn0011865	tRNA:G3:35Bd	DOWNSTREAM	43	A	C	C	0.1053	4	34	-1.585	5.07541e-09	(TF_binding_site|BDTNP1_TFBS_Med|FBsf0000278603);(TF_binding_site|mE1_TFBS_HSA|FBsf0000351157)
gamma-glutamylglutamine	2730	2L_14530503_SNP	FBgn0011866	tRNA:G3:35Be	DOWNSTREAM	351	A	C	C	0.1053	4	34	-1.585	5.07541e-09	(TF_binding_site|BDTNP1_TFBS_Med|FBsf0000278603);(TF_binding_site|mE1_TFBS_HSA|FBsf0000351157)
gamma-glutamylglutamine	2730	2L_14531170_SNP	FBgn0011866	tRNA:G3:35Be	UPSTREAM	246	T	C	C	0.1026	4	35	-1.571	7.71863e-09	(TF_binding_site|mE1_TFBS_cad|FBsf0000242141);(TF_binding_site|mE1_TFBS_HSA|FBsf0000351158)
gamma-glutamylglutamine	2730	2L_14531170_SNP	FBgn0011865	tRNA:G3:35Bd	UPSTREAM	554	T	C	C	0.1026	4	35	-1.571	7.71863e-09	(TF_binding_site|mE1_TFBS_cad|FBsf0000242141);(TF_binding_site|mE1_TFBS_HSA|FBsf0000351158)
gamma-glutamylglutamine	2730	2L_14531293_SNP	FBgn0011866	tRNA:G3:35Be	UPSTREAM	369	C	T	T	0.1026	4	35	-1.571	7.71863e-09	(TF_binding_site|mE1_TFBS_cad|FBsf0000242141);(TF_binding_site|mE1_TFBS_HSA|FBsf0000351158)
gamma-glutamylglutamine	2730	2L_14531293_SNP	FBgn0011865	tRNA:G3:35Bd	UPSTREAM	677	C	T	T	0.1026	4	35	-1.571	7.71863e-09	(TF_binding_site|mE1_TFBS_cad|FBsf0000242141);(TF_binding_site|mE1_TFBS_HSA|FBsf0000351158)
gamma-glutamylglutamine	2730	2L_14534612_SNP	Intergenic	Intergenic	Intergenic		A	C	C	0.1026	4	35	-1.571	7.71863e-09	-
gamma-glutamylglutamine	2730	3L_16148868_SNP	FBgn0036576	CG5151	INTRON	0	A	G	G	0.1351	5	32	-1.399	2.4732e-08	-
gamma-glutamylglutamine	2730	2R_18289220_SNP	FBgn0034724	babos	UTR_5_PRIME	0	A	T	T	0.1	4	36	-1.535	2.80311e-08	(TF_binding_site|BDTNP1_TFBS_dl|FBsf0000303892);(TF_binding_site|BDTNP1_TFBS_Med|FBsf0000281255);(TF_binding_site|BDTNP1_TFBS_twi|FBsf0000200144);(TF_binding_site|mE1_TFBS_cad|FBsf0000247257);(TF_binding_site|mE1_TFBS_D|FBsf0000240898);(TF_binding_site|mE1_TFBS_disco|FBsf0000259938);(TF_binding_site|mE1_TFBS_HSA|FBsf0000359390);(TF_binding_site|mE1_TFBS_sens|FBsf0000229402);(TF_binding_site|mE1_T…
gamma-glutamylglutamine	2730	3R_3900107_SNP	FBgn0037546	mAChR-B	INTRON	0	A	G	A	0.1	4	36	-1.535	2.80311e-08	-
gamma-glutamylglutamine	2730	3R_3900117_SNP	FBgn0037546	mAChR-B	INTRON	0	T	G	T	0.1	4	36	-1.535	2.80311e-08	-
gamma-glutamylmethionine	44872	2L_14608435_SNP	FBgn0003016	osp	INTRON	0	G	A	A	0.1	4	36	-1.198	3.13076e-09	-
gamma-glutamylmethionine	44872	2L_14540115_SNP	Intergenic	Intergenic	Intergenic		C	T	T	0.1026	4	35	-1.2	3.26771e-09	(TF_binding_site|BDTNP1_TFBS_da|FBsf0000322470);(TF_binding_site|BDTNP1_TFBS_dl|FBsf0000298680);(TF_binding_site|BDTNP1_TFBS_Med|FBsf0000278604);(TF_binding_site|BDTNP1_TFBS_prd|FBsf0000275069);(TF_binding_site|BDTNP1_TFBS_twi|FBsf0000201730);(TF_binding_site|mE1_TFBS_cad|FBsf0000242142);(TF_binding_site|mE1_TFBS_disco|FBsf0000259402);(TF_binding_site|mE1_TFBS_HSA|FBsf0000351163)
gamma-glutamylmethionine	44872	2L_11516317_SNP	FBgn0032363	CG6509	INTRON	0	A	C	C	0.1053	4	34	-1.2	3.47571e-09	(TF_binding_site|BDTNP1_TFBS_da|FBsf0000322187);(TF_binding_site|BDTNP1_TFBS_dl|FBsf0000298159);(TF_binding_site|BDTNP1_TFBS_Med|FBsf0000278343);(TF_binding_site|BDTNP1_TFBS_twi|FBsf0000201489)
gamma-glutamylmethionine	44872	3L_18824159_SNP	FBgn0036816	Indy	INTRON	0	G	A	A	0.1026	4	35	-1.173	1.06526e-08	(TF_binding_site|mE1_TFBS_cad|FBsf0000245340)
gamma-glutamylmethionine	44872	3L_2205863_SNP	Intergenic	Intergenic	Intergenic		G	T	G	0.1081	4	33	-1.175	1.14172e-08	-
gamma-glutamylmethionine	44872	2L_2241749_SNP	FBgn0264979	CG4267	UPSTREAM	629	A	C	A	0.1	4	36	-1.173	1.20553e-08	(TF_binding_site|BDTNP1_TFBS_dl|FBsf0000296197);(TF_binding_site|mE1_TFBS_HSA|FBsf0000344618);(TF_binding_site|mE1_TFBS_Trl|FBsf0000337070)
gamma-glutamylmethionine	44872	3R_22163901_SNP	FBgn0053970	CG33970	INTRON	0	A	C	C	0.1	4	36	-1.165	1.44053e-08	-
gamma-glutamylmethionine	44872	2L_14546700_SNP	FBgn0250844	CG4218	DOWNSTREAM	798	C	A	C	0.1026	4	35	-1.167	1.51803e-08	(TF_binding_site|mE1_TFBS_Ubx|FBsf0000261911)
gamma-glutamylmethionine	44872	3R_17269501_SNP	FBgn0011278	lbe	INTRON	0	A	G	G	0.1	4	36	-1.159	2.16226e-08	(TF_binding_site|mE1_TFBS_sens|FBsf0000232800)
gluconate	587	2L_14348641_SNP	FBgn0028530	mTTF	NON_SYNONYMOUS_CODING	0	T	G	G	0.1	4	36	-0.5491	7.3156e-10	(TF_binding_site|BDTNP1_TFBS_dl|FBsf0000298609);(TF_binding_site|BDTNP1_TFBS_Med|FBsf0000278560);(TF_binding_site|mE1_TFBS_en|FBsf0000206058);(TF_binding_site|mE1_TFBS_HSA|FBsf0000351070);(TF_binding_site|mE1_TFBS_Ubx|FBsf0000261899)
gluconate	587	2L_14348641_SNP	FBgn0261534	l_2_34Fc	DOWNSTREAM	379	T	G	G	0.1	4	36	-0.5491	7.3156e-10	(TF_binding_site|BDTNP1_TFBS_dl|FBsf0000298609);(TF_binding_site|BDTNP1_TFBS_Med|FBsf0000278560);(TF_binding_site|mE1_TFBS_en|FBsf0000206058);(TF_binding_site|mE1_TFBS_HSA|FBsf0000351070);(TF_binding_site|mE1_TFBS_Ubx|FBsf0000261899)
gluconate	587	2L_14348641_SNP	FBgn0266144	CR44850	UPSTREAM	429	T	G	G	0.1	4	36	-0.5491	7.3156e-10	(TF_binding_site|BDTNP1_TFBS_dl|FBsf0000298609);(TF_binding_site|BDTNP1_TFBS_Med|FBsf0000278560);(TF_binding_site|mE1_TFBS_en|FBsf0000206058);(TF_binding_site|mE1_TFBS_HSA|FBsf0000351070);(TF_binding_site|mE1_TFBS_Ubx|FBsf0000261899)
gluconate	587	3L_18268843_SNP	Intergenic	Intergenic	Intergenic		A	G	G	0.1026	4	35	-0.5476	9.5658e-10	-
gluconate	587	3L_15479388_SNP	FBgn0036497	Ran-like	UPSTREAM	886	C	A	A	0.1176	4	30	-0.5523	9.6036e-10	-
gluconate	587	2R_16002851_SNP	FBgn0004364	18w	SYNONYMOUS_CODING	0	C	G	G	0.125	5	35	-0.4936	1.32195e-09	(TF_binding_site|BDTNP1_TFBS_dl|FBsf0000303379);(TF_binding_site|mE1_TFBS_chinmo|FBsf0000211614);(TF_binding_site|mE1_TFBS_HSA|FBsf0000358617)
gluconate	587	2R_17918544_SNP	FBgn0085399	CG34370	INTRON	0	G	A	A	0.1	4	36	-0.541	1.91476e-09	-
gluconate	587	3R_13898913_SNP	Intergenic	Intergenic	Intergenic		T	C	C	0.1053	4	34	-0.5374	3.41515e-09	-
gluconate	587	2R_17953197_SNP	FBgn0265192	Snp	INTRON	0	A	G	A	0.15	6	34	-0.4476	5.36464e-09	-
gluconate	587	2L_11088355_SNP	FBgn0032338	CG16854	INTRON	0	T	C	C	0.1	4	36	-0.5244	1.15364e-08	-
gluconate	587	3R_25901375_SNP	FBgn0266411	sima	INTRON	0	T	C	C	0.1053	4	34	-0.5237	1.43973e-08	-
glucose 1-phosphate	15561	X_16882177_SNP	FBgn0266354	CG45002	INTRON	0	A	G	G	0.1282	5	34	-0.4193	1.74643e-08	-
glucose 6-phosphate	31260	X_16882177_SNP	FBgn0266354	CG45002	INTRON	0	A	G	G	0.1282	5	34	-0.5506	1.3369e-09	-
glucose 6-phosphate	31260	3R_9840131_SNP	FBgn0264493	rdx	INTRON	0	T	A	A	0.1143	4	31	-0.5983	3.17977e-09	(TF_binding_site|BDTNP1_TFBS_dl|FBsf0000311592);(TF_binding_site|mE1_TFBS_HSA|FBsf0000371410)
glucose 6-phosphate	31260	2R_2681452_SNP	FBgn0085421	Epac	INTRON	0	A	G	G	0.275	11	29	-0.3889	1.7924e-08	-
glycerate	1572	2R_18120610_SNP	Intergenic	Intergenic	Intergenic		C	A	A	0.1026	4	35	-0.2885	1.58447e-08	-
glycerate	1572	3R_14438096_SNP	FBgn0263974	qin	INTRON	0	C	T	T	0.1053	4	34	-0.2883	1.75526e-08	-
glycerate	1572	3R_14438096_SNP	FBgn0038629	CG14304	INTRON	0	C	T	T	0.1053	4	34	-0.2883	1.75526e-08	-
glycerate	1572	2R_18120902_SNP	Intergenic	Intergenic	Intergenic		T	G	G	0.1	4	36	-0.2862	2.56453e-08	-
glycerate	1572	2R_18121257_SNP	Intergenic	Intergenic	Intergenic		A	T	T	0.1	4	36	-0.2862	2.56453e-08	-
glycerate	1572	2R_18121264_SNP	Intergenic	Intergenic	Intergenic		T	C	C	0.1	4	36	-0.2862	2.56453e-08	-
glycerate	1572	3R_7321486_SNP	Intergenic	Intergenic	Intergenic		C	G	G	0.1	4	36	-0.2862	2.56453e-08	-
glycerol	15122	2L_16632467_SNP	FBgn0259735	CG42389	INTRON	0	C	G	G	0.2051	8	31	-0.36	1.22231e-08	-
glycerol	15122	2L_16632463_SNP	FBgn0259735	CG42389	INTRON	0	A	G	G	0.2	8	32	-0.3557	1.60183e-08	-
glycerol	15122	2L_13746590_SNP	FBgn0028541	TM9SF4	UPSTREAM	362	A	C	A	0.1538	6	33	-0.3967	2.19703e-08	(TF_binding_site|BDTNP1_TFBS_da|FBsf0000322352)
glycerol	15122	2L_13746590_SNP	FBgn0266140	CR44846	UPSTREAM	362	A	C	A	0.1538	6	33	-0.3967	2.19703e-08	(TF_binding_site|BDTNP1_TFBS_da|FBsf0000322352)
glycosyl-N-palmitoyl-sphingosine	53013	3L_17091876_SNP	FBgn0260943	Rbp6	INTRON	0	C	T	T	0.2308	9	30	-0.1613	1.7976e-08	-
glycosyl-N-palmitoyl-sphingosine	53013	3L_17149782_SNP	FBgn0260943	Rbp6	INTRON	0	A	G	G	0.1316	5	33	-0.2015	2.52888e-08	-
glycosyl-N-palmitoyl-sphingosine	53013	2L_5328510_SNP	FBgn0031700	CG14022	INTRON	0	T	A	A	0.2368	9	29	-0.1606	2.69563e-08	-
glycosyl-N-palmitoyl-sphingosine	53013	2L_5328510_SNP	FBgn0015031	cype	DOWNSTREAM	541	T	A	A	0.2368	9	29	-0.1606	2.69563e-08	-
gulonic acid*	46957	3R_14172856_SNP	FBgn0038606	CG15803	INTRON	0	T	G	G	0.1081	4	33	-0.3236	6.3554e-10	-
gulonic acid*	46957	2L_12171226_INS	FBgn0032419	CG17217	UTR_3_PRIME	0	TAT	T	T	0.1316	5	33	-0.2724	2.94783e-08	-
gulonic acid*	46957	2L_12171226_INS	FBgn0032420	CG6583	UTR_3_PRIME	0	TAT	T	T	0.1316	5	33	-0.2724	2.94783e-08	-
gulonic acid*	46957	2L_12171226_INS	FBgn0051760	CG31760	DOWNSTREAM	719	TAT	T	T	0.1316	5	33	-0.2724	2.94783e-08	-
Isobar: fructose 1,6-diphosphate, glucose 1,6-diphosphate, myo-inositol 1,4 or 1,3-diphosphate	46896	3L_9585140_INS	FBgn0261555	CG42673	INTRON	0	TGCAT	T	T	0.1026	4	35	-0.8017	1.03875e-09	-
Isobar: fructose 1,6-diphosphate, glucose 1,6-diphosphate, myo-inositol 1,4 or 1,3-diphosphate	46896	3R_9658788_SNP	FBgn0266464	Nsf2	DOWNSTREAM	431	T	C	C	0.1026	4	35	-0.7988	1.45422e-09	(TF_binding_site|mE1_TFBS_bab1|FBsf0000214706)
Isobar: fructose 1,6-diphosphate, glucose 1,6-diphosphate, myo-inositol 1,4 or 1,3-diphosphate	46896	3L_9585162_SNP	FBgn0261555	CG42673	INTRON	0	A	C	C	0.1	4	36	-0.7963	1.46191e-09	-
Isobar: fructose 1,6-diphosphate, glucose 1,6-diphosphate, myo-inositol 1,4 or 1,3-diphosphate	46896	X_15325084_SNP	FBgn0263257	Cngl	INTRON	0	T	C	T	0.1	4	36	-0.7955	1.71629e-09	-
Isobar: fructose 1,6-diphosphate, glucose 1,6-diphosphate, myo-inositol 1,4 or 1,3-diphosphate	46896	3L_9585043_DEL	FBgn0261555	CG42673	INTRON	0	G	TAGAAGACATTAAAA	TAGAAGACATTAAAA	0.1143	4	31	-0.8003	1.77007e-09	-
Isobar: fructose 1,6-diphosphate, glucose 1,6-diphosphate, myo-inositol 1,4 or 1,3-diphosphate	46896	3L_9167051_SNP	FBgn0004244	Rdl	INTRON	0	T	A	A	0.1053	4	34	-0.7943	2.05871e-09	-
Isobar: fructose 1,6-diphosphate, glucose 1,6-diphosphate, myo-inositol 1,4 or 1,3-diphosphate	46896	3L_9585121_SNP	FBgn0261555	CG42673	INTRON	0	A	T	T	0.1053	4	34	-0.7928	2.31651e-09	-
Isobar: fructose 1,6-diphosphate, glucose 1,6-diphosphate, myo-inositol 1,4 or 1,3-diphosphate	46896	3L_9585095_SNP	FBgn0261555	CG42673	INTRON	0	A	T	T	0.1111	4	32	-0.7946	2.46261e-09	-
Isobar: fructose 1,6-diphosphate, glucose 1,6-diphosphate, myo-inositol 1,4 or 1,3-diphosphate	46896	3L_9585041_SNP	FBgn0261555	CG42673	INTRON	0	G	C	C	0.1111	4	32	-0.7943	2.52192e-09	-
Isobar: fructose 1,6-diphosphate, glucose 1,6-diphosphate, myo-inositol 1,4 or 1,3-diphosphate	46896	3R_26848457_SNP	Intergenic	Intergenic	Intergenic		T	G	G	0.1282	5	34	-0.7171	3.13871e-09	-
Isobar: fructose 1,6-diphosphate, glucose 1,6-diphosphate, myo-inositol 1,4 or 1,3-diphosphate	46896	2L_18149461_SNP	FBgn0041184	Socs36E	INTRON	0	C	G	C	0.125	4	28	-0.7739	1.68491e-08	(TF_binding_site|BDTNP1_TFBS_dl|FBsf0000299143);(TF_binding_site|BDTNP1_TFBS_hb|FBsf0000290901);(TF_binding_site|BDTNP1_TFBS_z|FBsf0000196246)
Isobar: fructose 1,6-diphosphate, glucose 1,6-diphosphate, myo-inositol 1,4 or 1,3-diphosphate	46896	3L_9166146_SNP	FBgn0004244	Rdl	INTRON	0	T	C	C	0.1026	4	35	-0.7586	2.45133e-08	(TF_binding_site|mE1_TFBS_HSA|FBsf0000363561);(TF_binding_site|mE1_TFBS_sbb|FBsf0000250210)
kynurenine	15140	X_13266343_SNP	FBgn0030478	CG1640	INTRON	0	C	T	C	0.25	9	27	-0.2683	8.9141e-09	-
kynurenine	15140	3L_17676469_SNP	FBgn0085280	CG34251	DOWNSTREAM	203	G	A	A	0.1892	7	30	-0.2856	3.01276e-08	-
lactosyl-N-palmitoyl-sphingosine	53010	2R_17623017_SNP	Intergenic	Intergenic	Intergenic		A	C	C	0.1111	4	32	-0.6036	7.5298e-10	-
lactosyl-N-palmitoyl-sphingosine	53010	2L_921476_SNP	Intergenic	Intergenic	Intergenic		T	C	C	0.1026	4	35	-0.5982	7.9507e-10	-
lactosyl-N-palmitoyl-sphingosine	53010	X_21278657_SNP	Intergenic	Intergenic	Intergenic		G	T	T	0.1	4	36	-0.5966	1.05665e-09	-
lactosyl-N-palmitoyl-sphingosine	53010	2L_1626076_DEL	FBgn0265814	CR44603	UPSTREAM	56	TT	T	TT	0.1111	4	32	-0.5984	1.29892e-09	-
lactosyl-N-palmitoyl-sphingosine	53010	2L_1213638_SNP	Intergenic	Intergenic	Intergenic		A	C	C	0.1026	4	35	-0.5874	2.97735e-09	-
lactosyl-N-palmitoyl-sphingosine	53010	2R_16356271_SNP	FBgn0086604	CG12484	INTRON	0	A	C	C	0.1	4	36	-0.5844	4.31323e-09	-
lactosyl-N-palmitoyl-sphingosine	53010	2L_1214003_SNP	FBgn0266885	CR45346	DOWNSTREAM	646	T	C	C	0.1053	4	34	-0.5844	5.17441e-09	-
lactosyl-N-palmitoyl-sphingosine	53010	2L_16012166_DEL	FBgn0028644	beat-Ic	INTRON	0	C	CAGCCAAAAACTCCATTAAACAA	CAGCCAAAAACTCCATTAAACAA	0.1	4	36	-0.5812	7.92839e-09	-
lactosyl-N-palmitoyl-sphingosine	53010	2L_16012201_SNP	FBgn0028644	beat-Ic	INTRON	0	T	C	C	0.1	4	36	-0.5812	7.92839e-09	-
lactosyl-N-palmitoyl-sphingosine	53010	2L_16012203_DEL	FBgn0028644	beat-Ic	INTRON	0	A	CG	CG	0.1	4	36	-0.5812	7.92839e-09	-
lactosyl-N-palmitoyl-sphingosine	53010	3L_10779064_DEL	FBgn0265737	CR44544	DOWNSTREAM	605	C	CGAA	CGAA	0.1	4	36	-0.5812	7.92839e-09	-
lactosyl-N-palmitoyl-sphingosine	53010	X_12535536_DEL	FBgn0030412	Tomosyn	INTRON	0	TT	T	TT	0.1111	4	32	-0.5733	1.64045e-08	(TF_binding_site|BDTNP1_TFBS_dl|FBsf0000318603);(TF_binding_site|mE1_TFBS_HSA|FBsf0000381877)
lactosyl-N-palmitoyl-sphingosine	53010	2R_10811750_INS	FBgn0027596	CG10249	INTRON	0	T	TGTT	T	0.1053	4	34	-0.5743	1.96571e-08	-
leucylalanine	40010	2L_10713814_SNP	Intergenic	Intergenic	Intergenic		A	T	T	0.1	4	36	-0.7692	2.2981e-11	-
leucylalanine	40010	3L_3499429_DEL	FBgn0259224	CG42324	INTRON	0	C	CA	CA	0.1316	5	33	-0.6435	1.1306e-08	-
leucylalanine	40010	2L_1428786_SNP	FBgn0263320	CG43401	NON_SYNONYMOUS_CODING	0	T	C	C	0.1026	4	35	-0.6905	2.85467e-08	-
leucylalanine	40010	3L_22141868_SNP	FBgn0037153	olf413	INTRON	0	A	C	C	0.1026	4	35	-0.6904	2.88141e-08	(TF_binding_site|BDTNP1_TFBS_da|FBsf0000327890)
leucylglutamine*	48189	2L_10713814_SNP	Intergenic	Intergenic	Intergenic		A	T	T	0.1	4	36	-0.6647	7.3492e-11	-
leucylglutamine*	48189	2L_6271000_SNP	FBgn0053531	Ddr	INTRON	0	T	A	A	0.1	4	36	-0.6352	2.41359e-09	-
leucylglutamine*	48189	2L_6271000_SNP	FBgn0261699	CR42735	UPSTREAM	24	T	A	A	0.1	4	36	-0.6352	2.41359e-09	-
leucylglutamine*	48189	2L_6271039_SNP	FBgn0053531	Ddr	INTRON	0	G	A	A	0.1	4	36	-0.6352	2.41359e-09	-
leucylglutamine*	48189	2L_6271039_SNP	FBgn0261699	CR42735	EXON	0	G	A	A	0.1	4	36	-0.6352	2.41359e-09	-
leucylglutamine*	48189	2R_19415243_SNP	FBgn0261786	mi	UTR_3_PRIME	0	A	T	T	0.1	4	36	-0.6352	2.41359e-09	(TF_binding_site|BDTNP1_TFBS_da|FBsf0000325249);(TF_binding_site|BDTNP1_TFBS_dl|FBsf0000304107);(TF_binding_site|BDTNP1_TFBS_Med|FBsf0000281373);(TF_binding_site|BDTNP1_TFBS_twi|FBsf0000200252);(TF_binding_site|mE1_TFBS_cad|FBsf0000247348);(TF_binding_site|mE1_TFBS_HSA|FBsf0000359813)
leucylglutamine*	48189	2R_19415243_SNP	FBgn0000241	bw	DOWNSTREAM	85	A	T	T	0.1	4	36	-0.6352	2.41359e-09	(TF_binding_site|BDTNP1_TFBS_da|FBsf0000325249);(TF_binding_site|BDTNP1_TFBS_dl|FBsf0000304107);(TF_binding_site|BDTNP1_TFBS_Med|FBsf0000281373);(TF_binding_site|BDTNP1_TFBS_twi|FBsf0000200252);(TF_binding_site|mE1_TFBS_cad|FBsf0000247348);(TF_binding_site|mE1_TFBS_HSA|FBsf0000359813)
leucylglutamine*	48189	2R_19415265_SNP	FBgn0261786	mi	UTR_3_PRIME	0	A	T	T	0.1	4	36	-0.6352	2.41359e-09	(TF_binding_site|BDTNP1_TFBS_da|FBsf0000325249);(TF_binding_site|BDTNP1_TFBS_dl|FBsf0000304107);(TF_binding_site|BDTNP1_TFBS_Med|FBsf0000281373);(TF_binding_site|BDTNP1_TFBS_twi|FBsf0000200252);(TF_binding_site|mE1_TFBS_cad|FBsf0000247348);(TF_binding_site|mE1_TFBS_HSA|FBsf0000359813)
leucylglutamine*	48189	2R_19415265_SNP	FBgn0000241	bw	DOWNSTREAM	63	A	T	T	0.1	4	36	-0.6352	2.41359e-09	(TF_binding_site|BDTNP1_TFBS_da|FBsf0000325249);(TF_binding_site|BDTNP1_TFBS_dl|FBsf0000304107);(TF_binding_site|BDTNP1_TFBS_Med|FBsf0000281373);(TF_binding_site|BDTNP1_TFBS_twi|FBsf0000200252);(TF_binding_site|mE1_TFBS_cad|FBsf0000247348);(TF_binding_site|mE1_TFBS_HSA|FBsf0000359813)
leucylglutamine*	48189	2R_19426870_SNP	FBgn0050181	ppk3	INTRON	0	T	G	G	0.1026	4	35	-0.6296	2.61748e-09	(TF_binding_site|BDTNP1_TFBS_da|FBsf0000325250);(TF_binding_site|mE1_TFBS_cad|FBsf0000247349);(TF_binding_site|mE1_TFBS_chinmo|FBsf0000211907);(TF_binding_site|mE1_TFBS_HSA|FBsf0000359815)
leucylglutamine*	48189	2R_19426870_SNP	FBgn0000241	bw	UPSTREAM	848	T	G	G	0.1026	4	35	-0.6296	2.61748e-09	(TF_binding_site|BDTNP1_TFBS_da|FBsf0000325250);(TF_binding_site|mE1_TFBS_cad|FBsf0000247349);(TF_binding_site|mE1_TFBS_chinmo|FBsf0000211907);(TF_binding_site|mE1_TFBS_HSA|FBsf0000359815)
leucylglutamine*	48189	2R_19428955_SNP	FBgn0041233	Gr59e	INTRON	0	G	A	A	0.1	4	36	-0.6256	3.50013e-09	(TF_binding_site|mE1_TFBS_cad|FBsf0000247349)
leucylglutamine*	48189	2R_19428955_SNP	FBgn0050181	ppk3	UPSTREAM	659	G	A	A	0.1	4	36	-0.6256	3.50013e-09	(TF_binding_site|mE1_TFBS_cad|FBsf0000247349)
leucylglutamine*	48189	2R_19428958_SNP	FBgn0041233	Gr59e	INTRON	0	G	A	A	0.1	4	36	-0.6256	3.50013e-09	(TF_binding_site|mE1_TFBS_cad|FBsf0000247349)
leucylglutamine*	48189	2R_19428958_SNP	FBgn0050181	ppk3	UPSTREAM	662	G	A	A	0.1	4	36	-0.6256	3.50013e-09	(TF_binding_site|mE1_TFBS_cad|FBsf0000247349)
leucylglutamine*	48189	2R_3784740_SNP	FBgn0050377	CG30377	INTRON	0	G	A	A	0.1	4	36	-0.6243	4.71615e-09	-
leucylglutamine*	48189	3R_10726183_SNP	FBgn0038277	RpS5b	UTR_3_PRIME	0	G	T	T	0.1	4	36	-0.6243	4.71615e-09	(TF_binding_site|mE1_TFBS_chinmo|FBsf0000212703)
leucylglutamine*	48189	3R_10726183_SNP	FBgn0262514	VhaPPA1-2	UPSTREAM	184	G	T	T	0.1	4	36	-0.6243	4.71615e-09	(TF_binding_site|mE1_TFBS_chinmo|FBsf0000212703)
leucylglutamine*	48189	3R_10726183_SNP	FBgn0038275	CG3817	DOWNSTREAM	844	G	T	T	0.1	4	36	-0.6243	4.71615e-09	(TF_binding_site|mE1_TFBS_chinmo|FBsf0000212703)
leucylglutamine*	48189	2R_19415252_SNP	FBgn0261786	mi	UTR_3_PRIME	0	C	A	A	0.1143	4	31	-0.6309	5.59975e-09	(TF_binding_site|BDTNP1_TFBS_da|FBsf0000325249);(TF_binding_site|BDTNP1_TFBS_dl|FBsf0000304107);(TF_binding_site|BDTNP1_TFBS_Med|FBsf0000281373);(TF_binding_site|BDTNP1_TFBS_twi|FBsf0000200252);(TF_binding_site|mE1_TFBS_cad|FBsf0000247348);(TF_binding_site|mE1_TFBS_HSA|FBsf0000359813)
leucylglutamine*	48189	2R_19415252_SNP	FBgn0000241	bw	DOWNSTREAM	76	C	A	A	0.1143	4	31	-0.6309	5.59975e-09	(TF_binding_site|BDTNP1_TFBS_da|FBsf0000325249);(TF_binding_site|BDTNP1_TFBS_dl|FBsf0000304107);(TF_binding_site|BDTNP1_TFBS_Med|FBsf0000281373);(TF_binding_site|BDTNP1_TFBS_twi|FBsf0000200252);(TF_binding_site|mE1_TFBS_cad|FBsf0000247348);(TF_binding_site|mE1_TFBS_HSA|FBsf0000359813)
leucylglutamine*	48189	2L_17739964_SNP	FBgn0015609	CadN	INTRON	0	G	C	C	0.1111	4	32	-0.6289	5.60771e-09	(TF_binding_site|BDTNP1_TFBS_da|FBsf0000322717);(TF_binding_site|BDTNP1_TFBS_dl|FBsf0000299110);(TF_binding_site|BDTNP1_TFBS_gt|FBsf0000293274);(TF_binding_site|BDTNP1_TFBS_hb|FBsf0000290894);(TF_binding_site|BDTNP1_TFBS_Med|FBsf0000278808);(TF_binding_site|BDTNP1_TFBS_twi|FBsf0000201969);(TF_binding_site|mE1_TFBS_cad|FBsf0000242300);(TF_binding_site|mE1_TFBS_HSA|FBsf0000351958)
leucylglutamine*	48189	X_16769596_SNP	FBgn0030798	CG13003	INTRON	0	C	T	C	0.1111	4	32	-0.6177	9.70399e-09	-
leucylglutamine*	48189	3L_3499429_DEL	FBgn0259224	CG42324	INTRON	0	C	CA	CA	0.1316	5	33	-0.5619	9.77898e-09	-
leucylglutamine*	48189	3L_22392693_SNP	FBgn0004449	Ten-m	INTRON	0	A	G	G	0.1	4	36	-0.6125	1.28861e-08	(TF_binding_site|BDTNP1_TFBS_da|FBsf0000327930);(TF_binding_site|BDTNP1_TFBS_dl|FBsf0000309194);(TF_binding_site|BDTNP1_TFBS_gt|FBsf0000294146);(TF_binding_site|BDTNP1_TFBS_hb|FBsf0000291641);(TF_binding_site|BDTNP1_TFBS_Med|FBsf0000283981);(TF_binding_site|BDTNP1_TFBS_prd|FBsf0000275811);(TF_binding_site|BDTNP1_TFBS_shn|FBsf0000273985);(TF_binding_site|BDTNP1_TFBS_sna|FBsf0000269705);(TF_binding…
leucylglutamine*	48189	2L_2869362_SNP	FBgn0051694	CG31694	SYNONYMOUS_CODING	0	A	G	G	0.1026	4	35	-0.6114	1.35372e-08	(TF_binding_site|mE1_TFBS_cad|FBsf0000241202)
leucylglutamine*	48189	2L_2869362_SNP	FBgn0031476	CG8813	UPSTREAM	290	A	G	G	0.1026	4	35	-0.6114	1.35372e-08	(TF_binding_site|mE1_TFBS_cad|FBsf0000241202)
leucylglutamine*	48189	2L_2869362_SNP	FBgn0031474	CG2991	DOWNSTREAM	814	A	G	G	0.1026	4	35	-0.6114	1.35372e-08	(TF_binding_site|mE1_TFBS_cad|FBsf0000241202)
leucylglutamine*	48189	2L_2888877_SNP	FBgn0041111	lilli	INTRON	0	C	G	G	0.1026	4	35	-0.6114	1.35372e-08	(TF_binding_site|BDTNP1_TFBS_da|FBsf0000321205);(TF_binding_site|BDTNP1_TFBS_dl|FBsf0000296298);(TF_binding_site|BDTNP1_TFBS_hb|FBsf0000290519);(TF_binding_site|BDTNP1_TFBS_Med|FBsf0000277342);(TF_binding_site|BDTNP1_TFBS_prd|FBsf0000274761);(TF_binding_site|BDTNP1_TFBS_twi|FBsf0000200673);(TF_binding_site|mE1_TFBS_disco|FBsf0000259177);(TF_binding_site|mE1_TFBS_HSA|FBsf0000344795);(TF_binding_si…
leucylglutamine*	48189	3L_1814723_SNP	FBgn0027790	GV1	INTRON	0	A	G	G	0.1	4	36	-0.6167	1.36999e-08	-
leucylglutamine*	48189	X_1786425_SNP	FBgn0000117	arm	INTRON	0	G	T	T	0.1	4	36	-0.6167	1.36999e-08	(TF_binding_site|mE1_TFBS_HSA|FBsf0000378276)
leucylglutamine*	48189	X_1786425_SNP	FBgn0023519	mRpL16	DOWNSTREAM	910	G	T	T	0.1	4	36	-0.6167	1.36999e-08	(TF_binding_site|mE1_TFBS_HSA|FBsf0000378276)
leucylglutamine*	48189	X_1786448_SNP	FBgn0000117	arm	INTRON	0	A	G	G	0.1	4	36	-0.6167	1.36999e-08	(TF_binding_site|mE1_TFBS_HSA|FBsf0000378276)
leucylglutamine*	48189	X_1786448_SNP	FBgn0023519	mRpL16	DOWNSTREAM	933	A	G	G	0.1	4	36	-0.6167	1.36999e-08	(TF_binding_site|mE1_TFBS_HSA|FBsf0000378276)
leucylglutamine*	48189	X_1786574_SNP	FBgn0000117	arm	INTRON	0	T	G	G	0.1	4	36	-0.6167	1.36999e-08	(TF_binding_site|BDTNP1_TFBS_dl|FBsf0000315826);(TF_binding_site|mE1_TFBS_HSA|FBsf0000378276)
leucylglutamine*	48189	X_1790842_SNP	FBgn0000117	arm	INTRON	0	T	C	C	0.1	4	36	-0.6167	1.36999e-08	-
leucylglutamine*	48189	2L_17595087_SNP	FBgn0261089	Sytalpha	INTRON	0	T	C	C	0.1	4	36	-0.6148	1.37265e-08	-
leucylglutamine*	48189	3R_25614284_SNP	FBgn0001297	kay	INTRON	0	T	C	C	0.1	4	36	-0.6148	1.37265e-08	-
leucylglutamine*	48189	2L_17717570_SNP	FBgn0015609	CadN	INTRON	0	C	G	G	0.1026	4	35	-0.6137	1.68898e-08	-
leucylglutamine*	48189	2L_9950121_SNP	FBgn0262428	mir-87	DOWNSTREAM	297	A	G	G	0.1026	4	35	-0.6143	1.76655e-08	-
leucylglutamine*	48189	3L_21885618_SNP	FBgn0262737	mub	INTRON	0	T	A	A	0.1026	4	35	-0.61	1.94283e-08	(TF_binding_site|mE1_TFBS_cad|FBsf0000245606)
leucylglutamine*	48189	2L_9150008_SNP	FBgn0052982	CG32982	INTRON	0	A	G	G	0.125	5	35	-0.5541	2.02804e-08	(TF_binding_site|BDTNP1_TFBS_da|FBsf0000322015);(TF_binding_site|BDTNP1_TFBS_dl|FBsf0000297659);(TF_binding_site|BDTNP1_TFBS_hb|FBsf0000290702);(TF_binding_site|BDTNP1_TFBS_Med|FBsf0000278097);(TF_binding_site|BDTNP1_TFBS_prd|FBsf0000274955);(TF_binding_site|BDTNP1_TFBS_twi|FBsf0000201305);(TF_binding_site|mE1_TFBS_cad|FBsf0000241738);(TF_binding_site|mE1_TFBS_eve|FBsf0000252958);(TF_binding_site…
leucylglutamine*	48189	2L_9950182_SNP	FBgn0262428	mir-87	DOWNSTREAM	236	A	G	G	0.1053	4	34	-0.6117	2.34528e-08	-
leucylglutamine*	48189	3R_9673845_SNP	Intergenic	Intergenic	Intergenic		C	G	G	0.1026	4	35	-0.6077	2.49652e-08	(TF_binding_site|mE1_TFBS_cad|FBsf0000248293)
leucylglutamine*	48189	2L_2869740_SNP	FBgn0051694	CG31694	INTRON	0	T	A	A	0.1026	4	35	-0.6044	2.58559e-08	(TF_binding_site|mE1_TFBS_cad|FBsf0000241202)
leucylglutamine*	48189	2L_2869740_SNP	FBgn0031476	CG8813	UTR_5_PRIME	0	T	A	A	0.1026	4	35	-0.6044	2.58559e-08	(TF_binding_site|mE1_TFBS_cad|FBsf0000241202)
leucylglutamine*	48189	2L_2873165_SNP	FBgn0051694	CG31694	INTRON	0	T	G	G	0.1026	4	35	-0.6044	2.58559e-08	(TF_binding_site|BDTNP1_TFBS_da|FBsf0000321200);(TF_binding_site|BDTNP1_TFBS_dl|FBsf0000296286);(TF_binding_site|BDTNP1_TFBS_Med|FBsf0000277333);(TF_binding_site|BDTNP1_TFBS_prd|FBsf0000274759);(TF_binding_site|BDTNP1_TFBS_twi|FBsf0000200667);(TF_binding_site|mE1_TFBS_HSA|FBsf0000344788)
leucylglutamine*	48189	2L_2871798_SNP	FBgn0051694	CG31694	INTRON	0	T	C	C	0.1	4	36	-0.6029	2.70629e-08	(TF_binding_site|mE1_TFBS_cad|FBsf0000241202)
leucylglutamine*	48189	2L_2872018_SNP	FBgn0051694	CG31694	INTRON	0	A	T	T	0.1	4	36	-0.6029	2.70629e-08	-
leucylglutamine*	48189	2L_2872108_SNP	FBgn0051694	CG31694	INTRON	0	A	G	G	0.1	4	36	-0.6029	2.70629e-08	-
leucylglycine	40045	2R_13800935_SNP	FBgn0011589	Elk	INTRON	0	A	T	T	0.2308	9	30	-0.2794	3.714e-10	-
leucylglycine	40045	3L_4387645_DEL	FBgn0035539	slow	INTRON	0	A	AGTAA	AGTAA	0.2703	10	27	-0.2533	2.97477e-08	-
linoleoylcarnitine*	46223	X_13001483_SNP	FBgn0263005	CG43313	INTRON	0	A	G	G	0.15	6	34	-0.6499	1.06152e-08	-
linoleoylcarnitine*	46223	X_13001483_SNP	FBgn0030449	Fer3HCH	UTR_3_PRIME	0	A	G	G	0.15	6	34	-0.6499	1.06152e-08	-
maltopentaose	35163	2L_10011636_SNP	FBgn0011584	Trp1	SYNONYMOUS_CODING	0	C	G	G	0.15	6	34	-0.4463	2.43721e-08	-
maltotetraose	15910	2R_10330754_SNP	FBgn0261613	Oaz	INTRON	0	G	A	A	0.1538	6	33	-1.34	5.3628e-14	-
maltotetraose	15910	2R_16389413_SNP	Intergenic	Intergenic	Intergenic		A	T	T	0.1316	5	33	-1.378	9.8723e-12	(regulatory_region|REDfly_CRMs|FBsf0000435812);(regulatory_region|REDfly_CRMs|FBsf0000436009)
maltotetraose	15910	2R_16579274_SNP	FBgn0265870	CR44659	UPSTREAM	226	C	G	G	0.1316	5	33	-1.305	7.9938e-10	-
maltotetraose	15910	3L_7481405_SNP	FBgn0035789	mthl6	DOWNSTREAM	387	A	G	G	0.1026	4	35	-1.417	1.62691e-09	-
maltotetraose	15910	2L_9633648_SNP	FBgn0032136	Apoltp	UPSTREAM	531	T	C	C	0.1	4	36	-1.414	1.8584e-09	-
maltotetraose	15910	2L_7842221_INS	FBgn0031954	CG14537	DOWNSTREAM	960	TG	T	T	0.1111	4	32	-1.415	3.19072e-09	-
maltotetraose	15910	2L_17539044_SNP	Intergenic	Intergenic	Intergenic		G	A	A	0.1026	4	35	-1.39	5.82332e-09	-
maltotetraose	15910	2L_17539295_SNP	Intergenic	Intergenic	Intergenic		A	T	T	0.1026	4	35	-1.39	5.82332e-09	-
maltotetraose	15910	2L_1997060_DEL	FBgn0053543	CG33543	DOWNSTREAM	41	C	CTTACAACCCAG	CTTACAACCCAG	0.1	4	36	-1.387	6.51055e-09	-
maltotetraose	15910	2L_7842075_SNP	FBgn0031954	CG14537	DOWNSTREAM	813	A	G	G	0.1	4	36	-1.387	6.51055e-09	-
maltotetraose	15910	2L_7842963_SNP	Intergenic	Intergenic	Intergenic		G	A	A	0.1	4	36	-1.387	6.51055e-09	-
maltotetraose	15910	2L_7842980_INS	Intergenic	Intergenic	Intergenic		AA	A	A	0.1	4	36	-1.387	6.51055e-09	-
maltotetraose	15910	2R_16579246_SNP	FBgn0265870	CR44659	UPSTREAM	254	T	G	G	0.1026	4	35	-1.388	6.7427e-09	-
maltotetraose	15910	2R_16579251_SNP	FBgn0265870	CR44659	UPSTREAM	249	T	C	C	0.1026	4	35	-1.388	6.7427e-09	-
maltotetraose	15910	2R_16579250_SNP	FBgn0265870	CR44659	UPSTREAM	250	T	G	G	0.1081	4	33	-1.382	9.41849e-09	-
maltotetraose	15910	2R_16579115_SNP	FBgn0265870	CR44659	UPSTREAM	385	C	A	A	0.1081	4	33	-1.381	1.06975e-08	-
maltotriose	44688	3L_14367882_INS	Intergenic	Intergenic	Intergenic		CC	C	C	0.1026	4	35	-0.9688	3.0905e-11	-
maltotriose	44688	3L_950764_SNP	FBgn0264574	Glut1	INTRON	0	A	G	G	0.1111	4	32	-0.9448	3.2141e-10	-
maltotriose	44688	2L_2719498_DEL	FBgn0051690	CG31690	DOWNSTREAM	68	A	AA	AA	0.1538	6	33	-0.7755	1.20543e-09	-
maltotriose	44688	3L_11210847_SNP	FBgn0261553	CG42671	INTRON	0	A	G	G	0.1026	4	35	-0.9222	1.29166e-09	-
maltotriose	44688	3L_11210843_SNP	FBgn0261553	CG42671	INTRON	0	G	C	C	0.1111	4	32	-0.9152	2.8162e-09	-
maltotriose	44688	3L_16908903_SNP	FBgn0261565	Lmpt	INTRON	0	G	T	T	0.1081	4	33	-0.9122	3.23781e-09	(TF_binding_site|BDTNP1_TFBS_z|FBsf0000197245);(TF_binding_site|mE1_TFBS_HSA|FBsf0000366057);(TF_binding_site|mE1_TFBS_Trl|FBsf0000340143)
maltotriose	44688	2R_10330754_SNP	FBgn0261613	Oaz	INTRON	0	G	A	A	0.1538	6	33	-0.7551	6.03791e-09	-
maltotriose	44688	3L_14367854_SNP	Intergenic	Intergenic	Intergenic		T	C	T	0.1282	5	34	-0.7994	1.70208e-08	-
maltotriose	44688	3R_17742132_SNP	FBgn0038919	CG17843	DOWNSTREAM	864	A	G	G	0.1	4	36	-0.8846	1.71726e-08	-
maltotriose	44688	3R_23817306_SNP	FBgn0039568	CG4815	UPSTREAM	833	G	C	C	0.1	4	36	-0.8846	1.71726e-08	-
maltotriose	44688	3R_23817487_SNP	Intergenic	Intergenic	Intergenic		A	G	G	0.1	4	36	-0.8846	1.71726e-08	-
maltotriose	44688	2R_20405178_MNP	FBgn0259186	Ir60c	UPSTREAM	169	TTCAA	AGAGT	AGAGT	0.15	6	34	-0.733	2.57951e-08	(TF_binding_site|mE1_TFBS_cad|FBsf0000247462);(TF_binding_site|mE1_TFBS_chinmo|FBsf0000212075);(TF_binding_site|mE1_TFBS_HSA|FBsf0000360223)
maltotriose	44688	2R_20405178_MNP	FBgn0259185	Ir60b	DOWNSTREAM	197	TTCAA	AGAGT	AGAGT	0.15	6	34	-0.733	2.57951e-08	(TF_binding_site|mE1_TFBS_cad|FBsf0000247462);(TF_binding_site|mE1_TFBS_chinmo|FBsf0000212075);(TF_binding_site|mE1_TFBS_HSA|FBsf0000360223)
maltotriose	44688	2R_20405190_SNP	FBgn0259186	Ir60c	UPSTREAM	157	A	T	T	0.15	6	34	-0.733	2.57951e-08	(TF_binding_site|mE1_TFBS_cad|FBsf0000247462);(TF_binding_site|mE1_TFBS_chinmo|FBsf0000212075);(TF_binding_site|mE1_TFBS_HSA|FBsf0000360223)
maltotriose	44688	2R_20405190_SNP	FBgn0259185	Ir60b	DOWNSTREAM	209	A	T	T	0.15	6	34	-0.733	2.57951e-08	(TF_binding_site|mE1_TFBS_cad|FBsf0000247462);(TF_binding_site|mE1_TFBS_chinmo|FBsf0000212075);(TF_binding_site|mE1_TFBS_HSA|FBsf0000360223)
maltotriose	44688	2R_20405191_SNP	FBgn0259186	Ir60c	UPSTREAM	156	A	G	G	0.15	6	34	-0.733	2.57951e-08	(TF_binding_site|mE1_TFBS_cad|FBsf0000247462);(TF_binding_site|mE1_TFBS_chinmo|FBsf0000212075);(TF_binding_site|mE1_TFBS_HSA|FBsf0000360223)
maltotriose	44688	2R_20405191_SNP	FBgn0259185	Ir60b	DOWNSTREAM	210	A	G	G	0.15	6	34	-0.733	2.57951e-08	(TF_binding_site|mE1_TFBS_cad|FBsf0000247462);(TF_binding_site|mE1_TFBS_chinmo|FBsf0000212075);(TF_binding_site|mE1_TFBS_HSA|FBsf0000360223)
maltotriose	44688	2R_20405193_SNP	FBgn0259186	Ir60c	UPSTREAM	154	G	A	A	0.15	6	34	-0.733	2.57951e-08	(TF_binding_site|mE1_TFBS_cad|FBsf0000247462);(TF_binding_site|mE1_TFBS_chinmo|FBsf0000212075);(TF_binding_site|mE1_TFBS_HSA|FBsf0000360223)
maltotriose	44688	2R_20405193_SNP	FBgn0259185	Ir60b	DOWNSTREAM	212	G	A	A	0.15	6	34	-0.733	2.57951e-08	(TF_binding_site|mE1_TFBS_cad|FBsf0000247462);(TF_binding_site|mE1_TFBS_chinmo|FBsf0000212075);(TF_binding_site|mE1_TFBS_HSA|FBsf0000360223)
maltotriose	44688	2R_20405194_INS	FBgn0259186	Ir60c	UPSTREAM	152	TCCACC	T	T	0.15	6	34	-0.733	2.57951e-08	(TF_binding_site|mE1_TFBS_cad|FBsf0000247462);(TF_binding_site|mE1_TFBS_chinmo|FBsf0000212075);(TF_binding_site|mE1_TFBS_HSA|FBsf0000360223)
maltotriose	44688	2R_20405194_INS	FBgn0259185	Ir60b	DOWNSTREAM	214	TCCACC	T	T	0.15	6	34	-0.733	2.57951e-08	(TF_binding_site|mE1_TFBS_cad|FBsf0000247462);(TF_binding_site|mE1_TFBS_chinmo|FBsf0000212075);(TF_binding_site|mE1_TFBS_HSA|FBsf0000360223)
maltotriose	44688	2R_20405198_SNP	FBgn0259186	Ir60c	UPSTREAM	149	A	C	C	0.15	6	34	-0.733	2.57951e-08	(TF_binding_site|mE1_TFBS_cad|FBsf0000247462);(TF_binding_site|mE1_TFBS_chinmo|FBsf0000212075);(TF_binding_site|mE1_TFBS_HSA|FBsf0000360223)
maltotriose	44688	2R_20405198_SNP	FBgn0259185	Ir60b	DOWNSTREAM	217	A	C	C	0.15	6	34	-0.733	2.57951e-08	(TF_binding_site|mE1_TFBS_cad|FBsf0000247462);(TF_binding_site|mE1_TFBS_chinmo|FBsf0000212075);(TF_binding_site|mE1_TFBS_HSA|FBsf0000360223)
maltotriose	44688	2R_20405203_SNP	FBgn0259186	Ir60c	UPSTREAM	144	A	C	C	0.15	6	34	-0.733	2.57951e-08	(TF_binding_site|mE1_TFBS_cad|FBsf0000247462);(TF_binding_site|mE1_TFBS_chinmo|FBsf0000212075);(TF_binding_site|mE1_TFBS_HSA|FBsf0000360223)
maltotriose	44688	2R_20405203_SNP	FBgn0259185	Ir60b	DOWNSTREAM	222	A	C	C	0.15	6	34	-0.733	2.57951e-08	(TF_binding_site|mE1_TFBS_cad|FBsf0000247462);(TF_binding_site|mE1_TFBS_chinmo|FBsf0000212075);(TF_binding_site|mE1_TFBS_HSA|FBsf0000360223)
maltotriose	44688	2R_20405209_INS	FBgn0259186	Ir60c	UPSTREAM	138	AACTCAAA	G	G	0.15	6	34	-0.733	2.57951e-08	(TF_binding_site|mE1_TFBS_cad|FBsf0000247462);(TF_binding_site|mE1_TFBS_chinmo|FBsf0000212075)
maltotriose	44688	2R_20405209_INS	FBgn0259185	Ir60b	DOWNSTREAM	228	AACTCAAA	G	G	0.15	6	34	-0.733	2.57951e-08	(TF_binding_site|mE1_TFBS_cad|FBsf0000247462);(TF_binding_site|mE1_TFBS_chinmo|FBsf0000212075)
maltotriose	44688	2R_20405213_SNP	FBgn0259186	Ir60c	UPSTREAM	134	T	A	A	0.15	6	34	-0.733	2.57951e-08	(TF_binding_site|mE1_TFBS_cad|FBsf0000247462);(TF_binding_site|mE1_TFBS_chinmo|FBsf0000212075)
maltotriose	44688	2R_20405213_SNP	FBgn0259185	Ir60b	DOWNSTREAM	232	T	A	A	0.15	6	34	-0.733	2.57951e-08	(TF_binding_site|mE1_TFBS_cad|FBsf0000247462);(TF_binding_site|mE1_TFBS_chinmo|FBsf0000212075)
maltotriose	44688	2R_20405216_SNP	FBgn0259186	Ir60c	UPSTREAM	131	A	C	C	0.15	6	34	-0.733	2.57951e-08	(TF_binding_site|mE1_TFBS_cad|FBsf0000247462);(TF_binding_site|mE1_TFBS_chinmo|FBsf0000212075)
maltotriose	44688	2R_20405216_SNP	FBgn0259185	Ir60b	DOWNSTREAM	235	A	C	C	0.15	6	34	-0.733	2.57951e-08	(TF_binding_site|mE1_TFBS_cad|FBsf0000247462);(TF_binding_site|mE1_TFBS_chinmo|FBsf0000212075)
maltotriose	44688	2L_15545387_SNP	Intergenic	Intergenic	Intergenic		G	A	A	0.1351	5	32	-0.7878	2.88569e-08	-
methionine sulfone	44878	3L_80877_SNP	Intergenic	Intergenic	Intergenic		C	T	T	0.1176	4	30	-0.9296	1.36116e-09	-
methionine sulfone	44878	2R_4741175_SNP	FBgn0024189	sns	UTR_3_PRIME	0	A	T	T	0.1026	4	35	-0.9002	4.56664e-09	(TF_binding_site|BDTNP1_TFBS_hb|FBsf0000290003);(TF_binding_site|mE1_TFBS_HSA|FBsf0000354694)
methionine sulfone	44878	3R_19630398_SNP	FBgn0085384	CG34355	INTRON	0	T	G	G	0.1026	4	35	-0.8909	1.10999e-08	-
methionine sulfone	44878	3R_19630398_SNP	FBgn0053111	CG33111	INTRON	0	T	G	G	0.1026	4	35	-0.8909	1.10999e-08	-
methionine sulfone	44878	2R_4749725_DEL	FBgn0011286	RyR	INTRON	0	T	TT	TT	0.1081	4	33	-0.8811	1.67734e-08	(TF_binding_site|BDTNP1_TFBS_da|FBsf0000323541);(TF_binding_site|BDTNP1_TFBS_dl|FBsf0000300742);(TF_binding_site|BDTNP1_TFBS_Med|FBsf0000279594);(TF_binding_site|BDTNP1_TFBS_slp1|FBsf0000272024);(TF_binding_site|BDTNP1_TFBS_twi|FBsf0000198776);(TF_binding_site|mE1_TFBS_HSA|FBsf0000354697);(TF_binding_site|mE1_TFBS_Trl|FBsf0000338145)
methionine sulfone	44878	3L_10541872_SNP	FBgn0052062	A2bp1	INTRON	0	T	C	C	0.1	4	36	-0.8803	1.6778e-08	-
methionine sulfone	44878	3R_27012179_SNP	FBgn0051004	mesh	INTRON	0	T	C	C	0.175	7	33	-0.6891	1.87698e-08	-
methionine sulfone	44878	3R_18106344_SNP	FBgn0051163	SKIP	INTRON	0	G	T	T	0.175	7	33	-0.6932	2.13999e-08	-
methionine sulfone	44878	3R_18106357_SNP	FBgn0051163	SKIP	INTRON	0	A	G	G	0.175	7	33	-0.6932	2.13999e-08	-
methionine sulfone	44878	3R_18106359_SNP	FBgn0051163	SKIP	INTRON	0	T	C	C	0.175	7	33	-0.6932	2.13999e-08	-
methionine sulfone	44878	3R_18106373_SNP	FBgn0051163	SKIP	INTRON	0	A	C	C	0.175	7	33	-0.6932	2.13999e-08	-
methionine sulfone	44878	3R_25010347_SNP	FBgn0039647	CG14509	INTRON	0	A	G	G	0.1579	6	32	-0.7413	2.34911e-08	-
methionine sulfone	44878	3R_18106367_SNP	FBgn0051163	SKIP	INTRON	0	C	A	A	0.1795	7	32	-0.6922	2.69565e-08	-
methionine sulfone	44878	3R_18106371_SNP	FBgn0051163	SKIP	INTRON	0	G	C	C	0.1538	6	33	-0.7357	2.98474e-08	-
methylmalonate (MMA)	1496	X_1340492_SNP	FBgn0259108	futsch	NON_SYNONYMOUS_CODING	0	C	T	T	0.1316	5	33	-0.7858	1.00178e-08	(TF_binding_site|mE1_TFBS_chinmo|FBsf0000208032)
methylsuccinate	15745	2R_17758151_SNP	Intergenic	Intergenic	Intergenic		A	G	A	0.1026	4	35	-0.3657	7.14877e-09	-
methylsuccinate	15745	X_6194441_SNP	FBgn0043796	CG12219	SYNONYMOUS_CODING	0	A	G	G	0.1	4	36	-0.362	1.14884e-08	(TF_binding_site|mE1_TFBS_cad|FBsf0000242924);(TF_binding_site|mE1_TFBS_chinmo|FBsf0000208430);(TF_binding_site|mE1_TFBS_HSA|FBsf0000379813)
methylsuccinate	15745	X_17410940_SNP	FBgn0263706	CG43658	INTRON	0	A	G	G	0.1026	4	35	-0.3603	1.60139e-08	-
methylsuccinate	15745	2L_10189878_SNP	FBgn0051874	CG31874	UTR_3_PRIME	0	T	G	T	0.1	4	36	-0.3591	1.77012e-08	(TF_binding_site|mE1_TFBS_cad|FBsf0000241799)
methylsuccinate	15745	2L_10189878_SNP	FBgn0028675	Sur	INTRON	0	T	G	T	0.1	4	36	-0.3591	1.77012e-08	(TF_binding_site|mE1_TFBS_cad|FBsf0000241799)
methylsuccinate	15745	X_5452736_SNP	FBgn0263512	Vsx2	INTRON	0	C	T	C	0.1026	4	35	-0.3574	2.40871e-08	-
methylsuccinate	15745	3L_1105049_SNP	Intergenic	Intergenic	Intergenic		G	A	A	0.125	5	35	-0.3229	2.7336e-08	(TF_binding_site|mE1_TFBS_cad|FBsf0000243922);(TF_binding_site|mE1_TFBS_chinmo|FBsf0000209483);(TF_binding_site|mE1_TFBS_HSA|FBsf0000360983)
methylsuccinate	15745	3L_1106492_SNP	Intergenic	Intergenic	Intergenic		T	C	C	0.125	5	35	-0.3229	2.7336e-08	-
mevalonate 5-phosphate	38627	X_21372404_SNP	FBgn0266457	CR45082	INTRON	0	A	C	A	0.1053	4	34	-0.627	7.4051e-10	-
mevalonate 5-phosphate	38627	3L_14391315_DEL	Intergenic	Intergenic	Intergenic		TT	T	TT	0.1622	6	31	-0.5185	3.62261e-09	-
mevalonate 5-phosphate	38627	3R_22880364_SNP	FBgn0004842	RYa-R	INTRON	0	G	A	A	0.175	7	33	-0.473	6.98063e-09	-
mevalonate 5-phosphate	38627	3L_14391343_SNP	Intergenic	Intergenic	Intergenic		T	G	T	0.1579	6	32	-0.5083	9.99755e-09	-
mevalonate 5-phosphate	38627	2R_15712664_SNP	Intergenic	Intergenic	Intergenic		T	C	C	0.175	7	33	-0.4697	1.13682e-08	(TF_binding_site|BDTNP1_TFBS_da|FBsf0000324794);(TF_binding_site|BDTNP1_TFBS_dl|FBsf0000303309);(TF_binding_site|BDTNP1_TFBS_twi|FBsf0000199865);(TF_binding_site|BDTNP1_TFBS_z|FBsf0000196737);(TF_binding_site|mE1_TFBS_disco|FBsf0000259887);(TF_binding_site|mE1_TFBS_hkb|FBsf0000255345);(TF_binding_site|mE1_TFBS_HSA|FBsf0000358515);(TF_binding_site|mE1_TFBS_sens|FBsf0000228956);(TF_binding_site|mE1…
mevalonate 5-phosphate	38627	3L_14391363_SNP	Intergenic	Intergenic	Intergenic		A	G	A	0.1667	6	30	-0.5052	1.75119e-08	-
mevalonate 5-phosphate	38627	X_10973477_SNP	FBgn0003366	sev	INTRON	0	T	A	A	0.125	5	35	-0.5339	1.83134e-08	(regulatory_region|REDfly_CRMs|FBsf0000435038);(regulatory_region|REDfly_CRMs|FBsf0000435334);(regulatory_region|REDfly_CRMs|FBsf0000435697);(regulatory_region|REDfly_CRMs|FBsf0000436235)
mevalonate 5-phosphate	38627	X_10973477_SNP	FBgn0265458	CR44358	EXON	0	T	A	A	0.125	5	35	-0.5339	1.83134e-08	(regulatory_region|REDfly_CRMs|FBsf0000435038);(regulatory_region|REDfly_CRMs|FBsf0000435334);(regulatory_region|REDfly_CRMs|FBsf0000435697);(regulatory_region|REDfly_CRMs|FBsf0000436235)
myo-inositol	1124	3L_14627004_SNP	FBgn0041604	dlp	INTRON	0	C	A	C	0.1143	4	31	-0.7111	7.06778e-09	(TF_binding_site|BDTNP1_TFBS_dl|FBsf0000307501);(TF_binding_site|BDTNP1_TFBS_Med|FBsf0000283115);(TF_binding_site|mE1_TFBS_cad|FBsf0000245024);(TF_binding_site|mE1_TFBS_Trl|FBsf0000339987)
myo-inositol	1124	2R_17150604_SNP	FBgn0085426	Rgk3	INTRON	0	C	G	G	0.1	4	36	-0.6993	1.15188e-08	-
N-acetylaspartate (NAA)	22185	2R_16829843_SNP	Intergenic	Intergenic	Intergenic		C	A	A	0.1111	4	32	-4.205	1.6233e-13	-
N-acetylaspartate (NAA)	22185	3R_27099964_DEL	Intergenic	Intergenic	Intergenic		A	AT	AT	0.1026	4	35	-4.147	4.8601e-13	(TF_binding_site|BDTNP1_TFBS_da|FBsf0000330978);(TF_binding_site|BDTNP1_TFBS_twi|FBsf0000266535);(TF_binding_site|mE1_TFBS_HSA|FBsf0000376966)
N-acetylaspartate (NAA)	22185	3L_5771566_SNP	FBgn0040298	Myt1	SYNONYMOUS_CODING	0	T	C	C	0.125	5	35	-3.723	1.3132e-12	(TF_binding_site|mE1_TFBS_chinmo|FBsf0000209822);(TF_binding_site|mE1_TFBS_sens|FBsf0000223100)
N-acetylaspartate (NAA)	22185	3L_11667149_INS	FBgn0052085	CG32085	INTRON	0	AA	T	T	0.1026	4	35	-4.099	1.7533e-12	-
N-acetylaspartate (NAA)	22185	3L_11667166_SNP	FBgn0052085	CG32085	INTRON	0	T	C	C	0.1026	4	35	-4.099	1.7533e-12	-
N-acetylaspartate (NAA)	22185	3L_11669823_SNP	FBgn0052085	CG32085	INTRON	0	A	C	C	0.1026	4	35	-4.099	1.7533e-12	-
N-acetylaspartate (NAA)	22185	3L_11669888_SNP	FBgn0052085	CG32085	INTRON	0	T	C	C	0.1026	4	35	-4.099	1.7533e-12	-
N-acetylaspartate (NAA)	22185	3L_11670317_SNP	FBgn0052085	CG32085	INTRON	0	A	T	T	0.1026	4	35	-4.099	1.7533e-12	-
N-acetylaspartate (NAA)	22185	3L_11668834_DEL	FBgn0052085	CG32085	INTRON	0	A	AAAGAGATCTCAGAA	AAAGAGATCTCAGAA	0.1111	4	32	-4.083	4.2828e-12	(TF_binding_site|mE1_TFBS_cad|FBsf0000244768)
N-acetylaspartate (NAA)	22185	2L_10137798_SNP	FBgn0265002	CG44153	INTRON	0	A	C	C	0.1	4	36	-4.051	5.0918e-12	-
N-acetylaspartate (NAA)	22185	2L_10137806_SNP	FBgn0265002	CG44153	INTRON	0	T	G	G	0.1	4	36	-4.051	5.0918e-12	-
N-acetylaspartate (NAA)	22185	2L_10144506_SNP	FBgn0265002	CG44153	INTRON	0	A	C	C	0.1	4	36	-4.051	5.0918e-12	-
N-acetylaspartate (NAA)	22185	2L_10144506_SNP	FBgn0032187	CG4839	UPSTREAM	270	A	C	C	0.1	4	36	-4.051	5.0918e-12	-
N-acetylaspartate (NAA)	22185	2L_10144438_SNP	FBgn0265002	CG44153	INTRON	0	A	C	C	0.1026	4	35	-4.054	5.3839e-12	-
N-acetylaspartate (NAA)	22185	2L_10144438_SNP	FBgn0032187	CG4839	UPSTREAM	338	A	C	C	0.1026	4	35	-4.054	5.3839e-12	-
N-acetylaspartate (NAA)	22185	2L_10144236_SNP	FBgn0265002	CG44153	INTRON	0	G	T	T	0.1081	4	33	-4.059	6.4203e-12	-
N-acetylaspartate (NAA)	22185	2L_10144236_SNP	FBgn0032187	CG4839	UPSTREAM	540	G	T	T	0.1081	4	33	-4.059	6.4203e-12	-
N-acetylaspartate (NAA)	22185	X_14080811_SNP	FBgn0030542	CG12481	UPSTREAM	475	A	G	G	0.1053	4	34	-4.047	7.3388e-12	(TF_binding_site|mE1_TFBS_kn|FBsf0000336821);(TF_binding_site|mE1_TFBS_zfh1|FBsf0000335205)
N-acetylaspartate (NAA)	22185	X_14080811_SNP	FBgn0052603	CG32603	DOWNSTREAM	971	A	G	G	0.1053	4	34	-4.047	7.3388e-12	(TF_binding_site|mE1_TFBS_kn|FBsf0000336821);(TF_binding_site|mE1_TFBS_zfh1|FBsf0000335205)
N-acetylaspartate (NAA)	22185	X_14190581_INS	Intergenic	Intergenic	Intergenic		TCT	T	T	0.1026	4	35	-4.041	7.3969e-12	-
N-acetylaspartate (NAA)	22185	2L_10144225_SNP	FBgn0265002	CG44153	INTRON	0	C	G	G	0.1053	4	34	-4.046	7.5909e-12	-
N-acetylaspartate (NAA)	22185	2L_10144225_SNP	FBgn0032187	CG4839	UPSTREAM	551	C	G	G	0.1053	4	34	-4.046	7.5909e-12	-
N-acetylaspartate (NAA)	22185	3L_7266156_SNP	FBgn0035756	unc-13-4A	INTRON	0	C	A	A	0.1026	4	35	-4.04	7.6048e-12	(TF_binding_site|mE1_TFBS_cad|FBsf0000244406)
N-acetylaspartate (NAA)	22185	2L_10144511_SNP	FBgn0265002	CG44153	INTRON	0	G	T	T	0.1053	4	34	-4.043	8.0214e-12	-
N-acetylaspartate (NAA)	22185	2L_10144511_SNP	FBgn0032187	CG4839	UPSTREAM	265	G	T	T	0.1053	4	34	-4.043	8.0214e-12	-
N-acetylaspartate (NAA)	22185	2R_1607006_SNP	FBgn0000099	ap	INTRON	0	A	T	A	0.1081	4	33	-4.043	9.4388e-12	-
N-acetylaspartate (NAA)	22185	3L_5770290_SNP	FBgn0052418	vito	INTRON	0	A	G	G	0.1026	4	35	-4.029	9.7769e-12	(TF_binding_site|BDTNP1_TFBS_twi|FBsf0000203015);(TF_binding_site|mE1_TFBS_HSA|FBsf0000362452)
N-acetylaspartate (NAA)	22185	3L_5770290_SNP	FBgn0040298	Myt1	DOWNSTREAM	286	A	G	G	0.1026	4	35	-4.029	9.7769e-12	(TF_binding_site|BDTNP1_TFBS_twi|FBsf0000203015);(TF_binding_site|mE1_TFBS_HSA|FBsf0000362452)
N-acetylaspartate (NAA)	22185	3L_5770290_SNP	FBgn0260936	scny	DOWNSTREAM	919	A	G	G	0.1026	4	35	-4.029	9.7769e-12	(TF_binding_site|BDTNP1_TFBS_twi|FBsf0000203015);(TF_binding_site|mE1_TFBS_HSA|FBsf0000362452)
N-acetylaspartate (NAA)	22185	2L_10136533_SNP	FBgn0265002	CG44153	INTRON	0	A	G	G	0.1111	4	32	-4.022	1.7586e-11	(TF_binding_site|mE1_TFBS_cad|FBsf0000241796)
N-acetylaspartate (NAA)	22185	2L_10136516_SNP	FBgn0265002	CG44153	INTRON	0	G	A	A	0.1081	4	33	-4.011	1.9307e-11	-
N-acetylaspartate (NAA)	22185	2L_10136531_SNP	FBgn0265002	CG44153	INTRON	0	T	A	A	0.1081	4	33	-4.011	1.9307e-11	-
N-acetylaspartate (NAA)	22185	3L_7265916_SNP	FBgn0035756	unc-13-4A	SYNONYMOUS_CODING	0	T	G	G	0.1282	5	34	-3.628	2.1018e-11	(TF_binding_site|mE1_TFBS_cad|FBsf0000244406);(TF_binding_site|mE1_TFBS_HSA|FBsf0000362913)
N-acetylaspartate (NAA)	22185	2L_11120121_SNP	FBgn0027582	CG6230	SYNONYMOUS_CODING	0	G	C	C	0.1	4	36	-3.969	3.302e-11	(TF_binding_site|BDTNP1_TFBS_dl|FBsf0000298061);(TF_binding_site|BDTNP1_TFBS_Med|FBsf0000278305);(TF_binding_site|BDTNP1_TFBS_twi|FBsf0000201464);(TF_binding_site|mE1_TFBS_cad|FBsf0000241879);(TF_binding_site|mE1_TFBS_HSA|FBsf0000347608);(TF_binding_site|mE1_TFBS_sens|FBsf0000217250)
N-acetylaspartate (NAA)	22185	2L_11120121_SNP	FBgn0032345	CG14921	DOWNSTREAM	521	G	C	C	0.1	4	36	-3.969	3.302e-11	(TF_binding_site|BDTNP1_TFBS_dl|FBsf0000298061);(TF_binding_site|BDTNP1_TFBS_Med|FBsf0000278305);(TF_binding_site|BDTNP1_TFBS_twi|FBsf0000201464);(TF_binding_site|mE1_TFBS_cad|FBsf0000241879);(TF_binding_site|mE1_TFBS_HSA|FBsf0000347608);(TF_binding_site|mE1_TFBS_sens|FBsf0000217250)
N-acetylaspartate (NAA)	22185	2L_11139068_SNP	FBgn0010197	Gyc32E	SYNONYMOUS_CODING	0	C	A	A	0.1	4	36	-3.969	3.302e-11	-
N-acetylaspartate (NAA)	22185	2L_11139068_SNP	FBgn0040211	hgo	DOWNSTREAM	503	C	A	A	0.1	4	36	-3.969	3.302e-11	-
N-acetylaspartate (NAA)	22185	2L_11141221_SNP	FBgn0010197	Gyc32E	SYNONYMOUS_CODING	0	T	C	C	0.1	4	36	-3.969	3.302e-11	-
N-acetylaspartate (NAA)	22185	3L_11317007_SNP	FBgn0265932	CR44721	UPSTREAM	57	G	T	T	0.1	4	36	-3.969	3.302e-11	(TF_binding_site|BDTNP1_TFBS_dl|FBsf0000306853)
N-acetylaspartate (NAA)	22185	3L_11317007_SNP	FBgn0265933	CR44722	DOWNSTREAM	64	G	T	T	0.1	4	36	-3.969	3.302e-11	(TF_binding_site|BDTNP1_TFBS_dl|FBsf0000306853)
N-acetylaspartate (NAA)	22185	3L_11317007_SNP	FBgn0265934	CR44723	DOWNSTREAM	419	G	T	T	0.1	4	36	-3.969	3.302e-11	(TF_binding_site|BDTNP1_TFBS_dl|FBsf0000306853)
N-acetylaspartate (NAA)	22185	3L_11317011_DEL	FBgn0265932	CR44721	UPSTREAM	62	T	TTTT	TTTT	0.1	4	36	-3.969	3.302e-11	(TF_binding_site|BDTNP1_TFBS_dl|FBsf0000306853)
N-acetylaspartate (NAA)	22185	3L_11317011_DEL	FBgn0265933	CR44722	DOWNSTREAM	69	T	TTTT	TTTT	0.1	4	36	-3.969	3.302e-11	(TF_binding_site|BDTNP1_TFBS_dl|FBsf0000306853)
N-acetylaspartate (NAA)	22185	3L_11317011_DEL	FBgn0265934	CR44723	DOWNSTREAM	414	T	TTTT	TTTT	0.1	4	36	-3.969	3.302e-11	(TF_binding_site|BDTNP1_TFBS_dl|FBsf0000306853)
N-acetylaspartate (NAA)	22185	3L_11317017_SNP	FBgn0265932	CR44721	UPSTREAM	67	C	T	T	0.1	4	36	-3.969	3.302e-11	(TF_binding_site|BDTNP1_TFBS_dl|FBsf0000306853)
N-acetylaspartate (NAA)	22185	3L_11317017_SNP	FBgn0265933	CR44722	DOWNSTREAM	74	C	T	T	0.1	4	36	-3.969	3.302e-11	(TF_binding_site|BDTNP1_TFBS_dl|FBsf0000306853)
N-acetylaspartate (NAA)	22185	3L_11317017_SNP	FBgn0265934	CR44723	DOWNSTREAM	409	C	T	T	0.1	4	36	-3.969	3.302e-11	(TF_binding_site|BDTNP1_TFBS_dl|FBsf0000306853)
N-acetylaspartate (NAA)	22185	3L_11317022_SNP	FBgn0265932	CR44721	UPSTREAM	72	G	A	A	0.1	4	36	-3.969	3.302e-11	(TF_binding_site|BDTNP1_TFBS_dl|FBsf0000306853)
N-acetylaspartate (NAA)	22185	3L_11317022_SNP	FBgn0265933	CR44722	DOWNSTREAM	79	G	A	A	0.1	4	36	-3.969	3.302e-11	(TF_binding_site|BDTNP1_TFBS_dl|FBsf0000306853)
N-acetylaspartate (NAA)	22185	3L_11317022_SNP	FBgn0265934	CR44723	DOWNSTREAM	404	G	A	A	0.1	4	36	-3.969	3.302e-11	(TF_binding_site|BDTNP1_TFBS_dl|FBsf0000306853)
N-acetylaspartate (NAA)	22185	3L_11316319_SNP	FBgn0265932	CR44721	DOWNSTREAM	137	A	G	G	0.1026	4	35	-3.971	3.5327e-11	-
N-acetylaspartate (NAA)	22185	3L_11316319_SNP	FBgn0265933	CR44722	UPSTREAM	302	A	G	G	0.1026	4	35	-3.971	3.5327e-11	-
N-acetylaspartate (NAA)	22185	3L_11315313_SNP	FBgn0036154	CG6168	UPSTREAM	494	G	T	G	0.1026	4	35	-3.963	4.2409e-11	-
N-acetylaspartate (NAA)	22185	3L_11512523_SNP	FBgn0036169	Fuca	SYNONYMOUS_CODING	0	A	G	G	0.1081	4	33	-3.873	3.2237e-10	-
N-acetylaspartate (NAA)	22185	3L_11512523_SNP	FBgn0036168	CG7512	DOWNSTREAM	519	A	G	G	0.1081	4	33	-3.873	3.2237e-10	-
N-acetylaspartate (NAA)	22185	X_14187848_SNP	FBgn0266278	CR44963	INTRON	0	T	G	G	0.1389	5	31	-3.412	2.78453e-09	-
N-acetylaspartate (NAA)	22185	2L_4386058_SNP	FBgn0031598	CG3338	UTR_5_PRIME	0	G	A	A	0.1053	4	34	-3.736	3.06423e-09	(TF_binding_site|BDTNP1_TFBS_dl|FBsf0000296611);(TF_binding_site|BDTNP1_TFBS_Med|FBsf0000277528);(TF_binding_site|BDTNP1_TFBS_twi|FBsf0000200817);(TF_binding_site|mE1_TFBS_cad|FBsf0000241314)
N-acetylaspartate (NAA)	22185	2L_4386058_SNP	FBgn0261976	Psf2	DOWNSTREAM	124	G	A	A	0.1053	4	34	-3.736	3.06423e-09	(TF_binding_site|BDTNP1_TFBS_dl|FBsf0000296611);(TF_binding_site|BDTNP1_TFBS_Med|FBsf0000277528);(TF_binding_site|BDTNP1_TFBS_twi|FBsf0000200817);(TF_binding_site|mE1_TFBS_cad|FBsf0000241314)
N-acetylaspartate (NAA)	22185	2R_13766868_SNP	FBgn0050325	CG30325	SYNONYMOUS_CODING	0	G	A	A	0.1	4	36	-3.714	3.65364e-09	(TF_binding_site|mE1_TFBS_HSA|FBsf0000357923)
N-acetylaspartate (NAA)	22185	2R_13766868_SNP	FBgn0011589	Elk	INTRON	0	G	A	A	0.1	4	36	-3.714	3.65364e-09	(TF_binding_site|mE1_TFBS_HSA|FBsf0000357923)
N-acetylaspartate (NAA)	22185	2R_13766868_SNP	FBgn0050110	CG30110	DOWNSTREAM	831	G	A	A	0.1	4	36	-3.714	3.65364e-09	(TF_binding_site|mE1_TFBS_HSA|FBsf0000357923)
N-acetylaspartate (NAA)	22185	3R_20724683_SNP	FBgn0040601	CG13643	SYNONYMOUS_CODING	0	A	G	G	0.1282	5	34	-3.373	3.8187e-09	(TF_binding_site|mE1_TFBS_cad|FBsf0000249214);(TF_binding_site|mE1_TFBS_chinmo|FBsf0000213309);(TF_binding_site|mE1_TFBS_HSA|FBsf0000374994)
N-acetylaspartate (NAA)	22185	3R_20724761_SNP	FBgn0040601	CG13643	SYNONYMOUS_CODING	0	C	A	A	0.1282	5	34	-3.373	3.8187e-09	(TF_binding_site|mE1_TFBS_cad|FBsf0000249214);(TF_binding_site|mE1_TFBS_chinmo|FBsf0000213309);(TF_binding_site|mE1_TFBS_HSA|FBsf0000374994);(TF_binding_site|mE1_TFBS_sens|FBsf0000233423)
N-acetylaspartate (NAA)	22185	3R_20724767_SNP	FBgn0040601	CG13643	SYNONYMOUS_CODING	0	C	G	G	0.1282	5	34	-3.373	3.8187e-09	(TF_binding_site|mE1_TFBS_cad|FBsf0000249214);(TF_binding_site|mE1_TFBS_chinmo|FBsf0000213309);(TF_binding_site|mE1_TFBS_HSA|FBsf0000374994);(TF_binding_site|mE1_TFBS_sens|FBsf0000233423)
N-acetylaspartate (NAA)	22185	X_6648351_SNP	FBgn0029898	CG14439	SYNONYMOUS_CODING	0	T	G	G	0.125	5	35	-3.358	4.45068e-09	-
N-acetylaspartate (NAA)	22185	2L_15087487_SNP	FBgn0028879	CG15270	SYNONYMOUS_CODING	0	A	G	G	0.1	4	36	-3.697	4.79272e-09	-
N-acetylaspartate (NAA)	22185	2L_15087538_SNP	FBgn0028879	CG15270	SYNONYMOUS_CODING	0	C	T	T	0.1026	4	35	-3.695	5.34673e-09	-
N-acetylaspartate (NAA)	22185	2L_14270629_DEL	FBgn0261563	wb	INTRON	0	T	AAA	AAA	0.1081	4	33	-3.693	6.50593e-09	-
N-acetylaspartate (NAA)	22185	3R_24692820_SNP	FBgn0264324	spg	INTRON	0	A	T	T	0.1026	4	35	-3.68	6.77725e-09	-
N-acetylaspartate (NAA)	22185	2L_12333294_SNP	Intergenic	Intergenic	Intergenic		G	C	C	0.1053	4	34	-3.682	7.08539e-09	-
N-acetylaspartate (NAA)	22185	3L_7738089_SNP	FBgn0052373	CG32373	INTRON	0	C	G	G	0.1316	5	33	-3.337	7.75458e-09	-
N-acetylaspartate (NAA)	22185	2L_14281943_DEL	FBgn0261563	wb	INTRON	0	A	AGTAAAAAACGTTTTCGTTA	AGTAAAAAACGTTTTCGTTA	0.125	5	35	-3.322	8.04528e-09	(TF_binding_site|mE1_TFBS_cad|FBsf0000242113)
N-acetylaspartate (NAA)	22185	2L_7016373_SNP	FBgn0000053	ade3	NON_SYNONYMOUS_CODING	0	C	G	G	0.1	4	36	-3.659	8.49285e-09	(TF_binding_site|mE1_TFBS_cad|FBsf0000241581);(TF_binding_site|mE1_TFBS_chinmo|FBsf0000207423)
N-acetylaspartate (NAA)	22185	2L_14275384_SNP	FBgn0261563	wb	INTRON	0	G	T	T	0.125	5	35	-3.317	8.77207e-09	-
N-acetylaspartate (NAA)	22185	2L_14275384_SNP	FBgn0052971	CG32971	INTRON	0	G	T	T	0.125	5	35	-3.317	8.77207e-09	-
N-acetylaspartate (NAA)	22185	2L_14275384_SNP	FBgn0265942	CR44729	UPSTREAM	930	G	T	T	0.125	5	35	-3.317	8.77207e-09	-
N-acetylaspartate (NAA)	22185	2L_11761468_SNP	Intergenic	Intergenic	Intergenic		T	C	T	0.125	5	35	-3.327	1.05554e-08	-
N-acetylaspartate (NAA)	22185	2L_14285592_SNP	FBgn0261563	wb	INTRON	0	C	T	T	0.1282	5	34	-3.311	1.12729e-08	(TF_binding_site|BDTNP1_TFBS_dl|FBsf0000298605)
N-acetylaspartate (NAA)	22185	2L_14270738_DEL	FBgn0261563	wb	INTRON	0	C	CC	CC	0.1026	4	35	-3.639	1.23112e-08	-
N-acetylaspartate (NAA)	22185	2R_2976750_SNP	FBgn0263934	esn	INTRON	0	G	T	T	0.1	4	36	-3.632	1.26269e-08	-
N-acetylaspartate (NAA)	22185	3R_23890590_SNP	FBgn0085391	CG34362	INTRON	0	G	A	A	0.1	4	36	-3.632	1.26269e-08	-
N-acetylaspartate (NAA)	22185	3R_23890630_SNP	FBgn0085391	CG34362	INTRON	0	C	G	G	0.1	4	36	-3.632	1.26269e-08	-
N-acetylaspartate (NAA)	22185	3R_9868407_SNP	Intergenic	Intergenic	Intergenic		C	G	G	0.1	4	36	-3.632	1.26269e-08	-
N-acetylaspartate (NAA)	22185	3R_21524355_SNP	FBgn0051092	LpR2	DOWNSTREAM	94	A	T	T	0.1	4	36	-3.632	1.26753e-08	-
N-acetylaspartate (NAA)	22185	3L_11315373_SNP	FBgn0036154	CG6168	UPSTREAM	554	A	T	A	0.1026	4	35	-3.631	1.40069e-08	-
N-acetylaspartate (NAA)	22185	3L_5761545_SNP	FBgn0035632	Ppat-Dpck	SYNONYMOUS_CODING	0	T	C	C	0.175	7	33	-2.855	1.61113e-08	(TF_binding_site|BDTNP1_TFBS_dl|FBsf0000305776);(TF_binding_site|BDTNP1_TFBS_Med|FBsf0000282262);(TF_binding_site|mE1_TFBS_chinmo|FBsf0000209820);(TF_binding_site|mE1_TFBS_sens|FBsf0000223093)
N-acetylaspartate (NAA)	22185	3L_5761545_SNP	FBgn0260936	scny	UPSTREAM	557	T	C	C	0.175	7	33	-2.855	1.61113e-08	(TF_binding_site|BDTNP1_TFBS_dl|FBsf0000305776);(TF_binding_site|BDTNP1_TFBS_Med|FBsf0000282262);(TF_binding_site|mE1_TFBS_chinmo|FBsf0000209820);(TF_binding_site|mE1_TFBS_sens|FBsf0000223093)
N-acetylaspartate (NAA)	22185	3L_5761647_SNP	FBgn0035632	Ppat-Dpck	SYNONYMOUS_CODING	0	T	C	C	0.175	7	33	-2.855	1.61113e-08	(TF_binding_site|BDTNP1_TFBS_dl|FBsf0000305776);(TF_binding_site|BDTNP1_TFBS_Med|FBsf0000282262);(TF_binding_site|mE1_TFBS_HSA|FBsf0000362448);(TF_binding_site|mE1_TFBS_sens|FBsf0000223093)
N-acetylaspartate (NAA)	22185	3L_5761647_SNP	FBgn0260936	scny	UPSTREAM	455	T	C	C	0.175	7	33	-2.855	1.61113e-08	(TF_binding_site|BDTNP1_TFBS_dl|FBsf0000305776);(TF_binding_site|BDTNP1_TFBS_Med|FBsf0000282262);(TF_binding_site|mE1_TFBS_HSA|FBsf0000362448);(TF_binding_site|mE1_TFBS_sens|FBsf0000223093)
N-acetylaspartate (NAA)	22185	3L_7396853_SNP	FBgn0035781	CG8560	INTRON	0	T	C	C	0.125	5	35	-3.276	1.69559e-08	-
N-acetylaspartate (NAA)	22185	3R_15902881_SNP	Intergenic	Intergenic	Intergenic		A	G	G	0.1	4	36	-3.611	1.7284e-08	-
N-acetylaspartate (NAA)	22185	2R_11533926_SNP	FBgn0260429	CG42524	INTRON	0	A	G	G	0.1	4	36	-3.606	1.83825e-08	-
N-acetylaspartate (NAA)	22185	2L_10136121_SNP	FBgn0265002	CG44153	INTRON	0	A	G	G	0.125	5	35	-3.269	1.89292e-08	-
N-acetylaspartate (NAA)	22185	2L_10102527_SNP	FBgn0265002	CG44153	INTRON	0	C	A	A	0.125	5	35	-3.282	2.22148e-08	-
N-acetylaspartate (NAA)	22185	2L_10102527_SNP	FBgn0083945	CG34109	INTRON	0	C	A	A	0.125	5	35	-3.282	2.22148e-08	-
N-acetylaspartate (NAA)	22185	3R_11972896_SNP	FBgn0038401	CG5916	START_GAINED	0	C	T	T	0.1579	6	32	-3.072	2.33075e-08	(TF_binding_site|BDTNP1_TFBS_dl|FBsf0000312013);(TF_binding_site|BDTNP1_TFBS_gt|FBsf0000294443);(TF_binding_site|BDTNP1_TFBS_twi|FBsf0000265142);(TF_binding_site|BDTNP1_TFBS_z|FBsf0000197638);(TF_binding_site|mE1_TFBS_cad|FBsf0000248500);(TF_binding_site|mE1_TFBS_D|FBsf0000239987);(TF_binding_site|mE1_TFBS_disco|FBsf0000260832);(TF_binding_site|mE1_TFBS_GATAe|FBsf0000258744);(TF_binding_site|mE1_…
N-acetylaspartate (NAA)	22185	3R_11972896_SNP	FBgn0038400	CG5903	UPSTREAM	319	C	T	T	0.1579	6	32	-3.072	2.33075e-08	(TF_binding_site|BDTNP1_TFBS_dl|FBsf0000312013);(TF_binding_site|BDTNP1_TFBS_gt|FBsf0000294443);(TF_binding_site|BDTNP1_TFBS_twi|FBsf0000265142);(TF_binding_site|BDTNP1_TFBS_z|FBsf0000197638);(TF_binding_site|mE1_TFBS_cad|FBsf0000248500);(TF_binding_site|mE1_TFBS_D|FBsf0000239987);(TF_binding_site|mE1_TFBS_disco|FBsf0000260832);(TF_binding_site|mE1_TFBS_GATAe|FBsf0000258744);(TF_binding_site|mE1_…
[truncated: 875 more rows]
