# Supplementary material for: Systems genetics of the Drosophila metabolome
Source: Genome Res. 2020 Mar;30(3):392–405. doi: 10.1101/gr.243030.118 (PMC7111526; doi:10.1101/gr.243030.118)
Supplement: Supplemental Material [file supp_gr.243030.118_Supplemental_Table_S6.xlsx.xlsx]

## Sheet: A. Females
Supplemental Table S6. Polymorphisms associated with metabolite module PCs. Orange indicates association at a Bonferroni threshold of P< 3.2E-8. (A) Females. (B) Males.
Module	PC	SNP ID	Flybase ID	Gene Symbol	SNP Location	Position	Minor Allele	Major Allele	Ref Allele	MAF	Minor Allele Count	Major Allele Count	Effect Size	P-value	Regulation Annotation
1	2	2L_7122572_SNP	FBgn0085407	Pvf3	INTRON	0	A	G	A	0.2308	9	30	0.5503	6.55813e-07	(TF_binding_site|BDTNP1_TFBS_dl|FBsf0000297217);(TF_binding_site|mE1_TFBS_cad|FBsf0000241594);(TF_binding_site|mE1_TFBS_Trl|FBsf0000337312)
1	2	2L_7559232_SNP	FBgn0264895	RapGAP1	INTRON	0	A	T	T	0.3429	12	23	0.5287	2.5185e-07	-
1	2	3L_9786762_SNP	FBgn0036044	Zasp67	NON_SYNONYMOUS_CODING	0	T	G	T	0.175	7	33	0.5941	1.15963e-06	-
1	2	3R_19145740_SNP	FBgn0003118	pnt	INTRON	0	A	T	T	0.2105	8	30	0.5773	6.13217e-07	(TF_binding_site|BDTNP1_TFBS_dl|FBsf0000313605);(TF_binding_site|mE1_TFBS_HSA|FBsf0000374436)
1	3	2L_15740733_SNP	FBgn0010382	CycE	INTRON	0	G	C	C	0.2703	10	27	-0.4408	6.96683e-07	(regulatory_region|FlyBase|FBsf0000161308);(regulatory_region|REDfly_CRMs|FBsf0000435688);(regulatory_region|REDfly_CRMs|FBsf0000435846);(TF_binding_site|BDTNP1_TFBS_dl|FBsf0000298837);(TF_binding_site|BDTNP1_TFBS_twi|FBsf0000201811);(TF_binding_site|mE1_TFBS_HSA|FBsf0000351445)
2	1	2L_14000479_SNP	FBgn0003255	rk	INTRON	0	T	A	A	0.3684	14	24	1.904	6.10957e-07	-
2	1	3L_8757193_SNP	FBgn0266084	Fhos	INTRON	0	A	G	G	0.4103	16	23	1.812	9.38386e-07	-
2	2	3R_15958617_SNP	Intergenic	Intergenic			G	T	G	0.1579	6	32	0.8419	1.75381e-07	-
2	3	2L_1405625_SNP	FBgn0002543	lea	INTRON	0	A	G	G	0.25	10	30	0.5973	1.28389e-06	(TF_binding_site|BDTNP1_TFBS_da|FBsf0000321044);(TF_binding_site|BDTNP1_TFBS_dl|FBsf0000295994);(TF_binding_site|BDTNP1_TFBS_Med|FBsf0000277184);(TF_binding_site|BDTNP1_TFBS_twi|FBsf0000200565);(TF_binding_site|mE1_TFBS_cad|FBsf0000241103)
2	3	2L_1405627_SNP	FBgn0002543	lea	INTRON	0	T	A	A	0.25	10	30	0.5973	1.28389e-06	(TF_binding_site|BDTNP1_TFBS_da|FBsf0000321044);(TF_binding_site|BDTNP1_TFBS_dl|FBsf0000295994);(TF_binding_site|BDTNP1_TFBS_Med|FBsf0000277184);(TF_binding_site|BDTNP1_TFBS_twi|FBsf0000200565);(TF_binding_site|mE1_TFBS_cad|FBsf0000241103)
2	3	2L_1405818_SNP	FBgn0002543	lea	INTRON	0	T	G	G	0.275	11	29	0.5682	1.85183e-06	(TF_binding_site|BDTNP1_TFBS_da|FBsf0000321044);(TF_binding_site|BDTNP1_TFBS_dl|FBsf0000295994);(TF_binding_site|BDTNP1_TFBS_Med|FBsf0000277184);(TF_binding_site|BDTNP1_TFBS_twi|FBsf0000200565);(TF_binding_site|mE1_TFBS_cad|FBsf0000241103)
2	3	2R_20318326_SNP	FBgn0035003	CG15873	UPSTREAM	104	G	C	C	0.1176	4	30	0.8623	1.6845e-06	-
2	3	2R_20318326_SNP	FBgn0035004	Pgam5-2	DOWNSTREAM	541	G	C	C	0.1176	4	30	0.8623	1.6845e-06	-
2	3	3L_10675980_SNP	FBgn0010762	simj	INTRON	0	A	G	G	0.3243	12	25	0.571	1.19879e-06	(TF_binding_site|BDTNP1_TFBS_dl|FBsf0000306706);(TF_binding_site|mE1_TFBS_HSA|FBsf0000363989);(TF_binding_site|mE1_TFBS_Trl|FBsf0000339783)
2	3	3L_13942212_SNP	FBgn0052137	CG32137	INTRON	0	C	G	G	0.1351	5	32	0.7729	1.94126e-06	(TF_binding_site|BDTNP1_TFBS_dl|FBsf0000307320);(TF_binding_site|mE1_TFBS_Trl|FBsf0000339941)
2	3	3R_10863264_SNP	FBgn0038281	RpL10Aa	SYNONYMOUS_CODING	0	C	T	T	0.1053	4	34	0.8747	7.92585e-07	(TF_binding_site|BDTNP1_TFBS_twi|FBsf0000265048)
2	3	3R_10863264_SNP	FBgn0266249	CR44944	UPSTREAM	796	C	T	T	0.1053	4	34	0.8747	7.92585e-07	(TF_binding_site|BDTNP1_TFBS_twi|FBsf0000265048)
2	3	3R_14784703_SNP	FBgn0263983	CG43732	UTR_3_PRIME	0	A	C	C	0.2368	9	29	0.6173	1.42051e-06	-
2	3	3R_14784703_SNP	FBgn0261262	CG42613	INTRON	0	A	C	C	0.2368	9	29	0.6173	1.42051e-06	-
2	3	3R_14800517_SNP	FBgn0261262	CG42613	INTRON	0	A	C	C	0.1	4	36	0.8564	1.46074e-06	(TF_binding_site|mE1_TFBS_sens|FBsf0000232426)
2	3	3R_14800517_SNP	FBgn0263983	CG43732	INTRON	0	A	C	C	0.1	4	36	0.8564	1.46074e-06	(TF_binding_site|mE1_TFBS_sens|FBsf0000232426)
2	3	3R_22234147_SNP	Intergenic	Intergenic			A	G	G	0.1	4	36	0.8564	1.46074e-06	-
3	1	2R_7261394_SNP	FBgn0033628	CG13203	UTR_5_PRIME	0	T	C	C	0.325	13	27	2.226	1.845e-06	(TF_binding_site|mE1_TFBS_chinmo|FBsf0000211095);(TF_binding_site|mE1_TFBS_HSA|FBsf0000355599)
3	2	2L_10086467_INS	FBgn0265002	CG44153	INTRON	0	CCAAATACCAAATAC	C	C	0.1282	5	34	1.296	2.38311e-07	-
3	2	2L_12348096_SNP	FBgn0262475	bru-2	INTRON	0	A	G	G	0.125	5	35	1.226	1.78113e-06	(TF_binding_site|BDTNP1_TFBS_dl|FBsf0000298268);(TF_binding_site|mE1_TFBS_HSA|FBsf0000350507);(TF_binding_site|mE1_TFBS_Trl|FBsf0000337542)
3	2	2L_1303891_SNP	Intergenic	Intergenic			A	T	T	0.2105	8	30	1.154	9.1019e-09	-
3	2	2L_17132575_SNP	FBgn0083942	CG34106	INTRON	0	T	A	A	0.1765	6	28	1.204	3.99934e-07	-
3	2	2L_17132575_SNP	FBgn0265607	beat-IIIa	INTRON	0	T	A	A	0.1765	6	28	1.204	3.99934e-07	-
3	2	2L_17216788_SNP	FBgn0032629	beat-IIIc	INTRON	0	T	G	G	0.2703	10	27	0.9563	1.56371e-06	-
3	2	2L_19400265_SNP	FBgn0041789	Pax	DOWNSTREAM	488	T	G	G	0.1	4	36	1.4	4.95008e-07	-
3	2	2L_19400313_SNP	FBgn0041789	Pax	DOWNSTREAM	440	C	A	A	0.1	4	36	1.4	4.95008e-07	-
3	2	2L_19400329_SNP	FBgn0041789	Pax	DOWNSTREAM	424	C	A	A	0.1026	4	35	1.385	7.80716e-07	-
3	2	2L_19402014_SNP	FBgn0041789	Pax	INTRON	0	T	G	G	0.1538	6	33	1.209	1.87016e-07	-
3	2	2R_12480973_SNP	FBgn0034142	CG8306	INTRON	0	A	G	A	0.175	7	33	1.069	1.34627e-06	(TF_binding_site|BDTNP1_TFBS_da|FBsf0000324484);(TF_binding_site|BDTNP1_TFBS_dl|FBsf0000302630)
3	2	2R_12606968_INS	FBgn0050463	CG30463	INTRON	0	A	AGATC	A	0.1389	5	31	1.236	1.77187e-06	(TF_binding_site|mE1_TFBS_HSA|FBsf0000357524);(TF_binding_site|mE1_TFBS_sbb|FBsf0000251300)
3	2	2R_7660320_SNP	FBgn0033652	ths	INTRON	0	T	A	A	0.3158	12	26	0.8877	1.58393e-06	-
3	2	2R_8975948_SNP	Intergenic	Intergenic			G	A	A	0.225	9	31	0.9921	7.93351e-07	-
3	2	3L_10149654_SNP	FBgn0052057	dpr10	SYNONYMOUS_CODING	0	T	C	C	0.1026	4	35	1.404	4.68964e-07	-
3	2	3L_14888825_SNP	Intergenic	Intergenic			C	T	T	0.1	4	36	1.343	2.1616e-06	-
3	2	3L_14889029_SNP	Intergenic	Intergenic			T	A	A	0.1	4	36	1.343	2.1616e-06	-
3	2	3L_14889059_SNP	Intergenic	Intergenic			T	C	C	0.1053	4	34	1.362	1.47189e-06	-
3	2	3L_14889069_SNP	Intergenic	Intergenic			C	T	T	0.1053	4	34	1.362	1.47189e-06	-
3	2	3L_16309251_INS	Intergenic	Intergenic			GGTACATAT	G	G	0.1538	6	33	1.219	1.30358e-07	(TF_binding_site|BDTNP1_TFBS_dl|FBsf0000307931);(TF_binding_site|BDTNP1_TFBS_twi|FBsf0000204016);(TF_binding_site|mE1_TFBS_HSA|FBsf0000365831)
3	2	3L_16309254_SNP	Intergenic	Intergenic			T	G	G	0.1538	6	33	1.219	1.30358e-07	(TF_binding_site|BDTNP1_TFBS_dl|FBsf0000307931);(TF_binding_site|BDTNP1_TFBS_twi|FBsf0000204016);(TF_binding_site|mE1_TFBS_HSA|FBsf0000365831)
3	2	3L_16309255_SNP	Intergenic	Intergenic			A	G	G	0.1538	6	33	1.219	1.30358e-07	(TF_binding_site|BDTNP1_TFBS_dl|FBsf0000307931);(TF_binding_site|BDTNP1_TFBS_twi|FBsf0000204016);(TF_binding_site|mE1_TFBS_HSA|FBsf0000365831)
3	2	3R_23341602_SNP	FBgn0039522	CG13972	DOWNSTREAM	31	A	T	T	0.2	8	32	1.099	7.33399e-08	(TF_binding_site|mE1_TFBS_chinmo|FBsf0000213480);(TF_binding_site|mE1_TFBS_HSA|FBsf0000375742)
3	2	X_17163353_SNP	FBgn0262111	f	INTRON	0	T	C	C	0.1795	7	32	1.096	8.22505e-07	-
3	2	X_18619977_SNP	FBgn0259231	CCKLR-17D1	SYNONYMOUS_CODING	0	A	G	G	0.125	5	35	1.284	3.34377e-07	(TF_binding_site|mE1_TFBS_chinmo|FBsf0000209182);(TF_binding_site|mE1_TFBS_HSA|FBsf0000349312);(TF_binding_site|mE1_TFBS_inv|FBsf0000235555)
3	2	X_18619977_SNP	FBgn0259198	CG42302	UPSTREAM	272	A	G	G	0.125	5	35	1.284	3.34377e-07	(TF_binding_site|mE1_TFBS_chinmo|FBsf0000209182);(TF_binding_site|mE1_TFBS_HSA|FBsf0000349312);(TF_binding_site|mE1_TFBS_inv|FBsf0000235555)
3	3	2L_16196763_SNP	FBgn0265948	CR44735	UPSTREAM	518	T	C	C	0.15	6	34	-0.9323	1.45602e-06	-
3	3	2L_17201803_SNP	FBgn0032629	beat-IIIc	INTRON	0	T	G	G	0.175	7	33	-0.8726	1.66769e-06	-
3	3	2L_17207653_SNP	FBgn0032629	beat-IIIc	INTRON	0	T	A	A	0.1579	6	32	-0.9435	1.14051e-06	-
3	3	2L_21630892_SNP	FBgn0022893	Df31	UPSTREAM	960	A	T	T	0.1538	6	33	-0.9337	1.5005e-06	(TF_binding_site|BDTNP1_TFBS_da|FBsf0000323100);(TF_binding_site|BDTNP1_TFBS_dl|FBsf0000299832);(TF_binding_site|BDTNP1_TFBS_Med|FBsf0000279181);(TF_binding_site|BDTNP1_TFBS_twi|FBsf0000202352);(TF_binding_site|mE1_TFBS_HSA|FBsf0000353120);(transposable_element|FlyBase|FBti0062910)
3	3	2L_21634228_SNP	FBgn0023416	Ac3	INTRON	0	C	T	T	0.1579	6	32	-0.929	1.91612e-06	(TF_binding_site|BDTNP1_TFBS_dl|FBsf0000299835);(TF_binding_site|BDTNP1_TFBS_twi|FBsf0000202355)
3	3	2L_21639040_DEL	FBgn0023416	Ac3	INTRON	0	T	TAAAATTC	TAAAATTC	0.1538	6	33	-0.9299	1.7178e-06	-
3	3	2L_21639057_SNP	FBgn0023416	Ac3	INTRON	0	A	C	C	0.1538	6	33	-0.925	2.03785e-06	-
3	3	2L_21682355_SNP	FBgn0000559	EF2	UPSTREAM	191	A	T	T	0.2162	8	29	-0.867	4.89279e-07	(TF_binding_site|BDTNP1_TFBS_dl|FBsf0000299848);(TF_binding_site|BDTNP1_TFBS_Med|FBsf0000279188);(TF_binding_site|BDTNP1_TFBS_slp1|FBsf0000271958);(TF_binding_site|BDTNP1_TFBS_z|FBsf0000196317);(TF_binding_site|mE1_TFBS_HSA|FBsf0000353130)
3	3	2L_21683206_INS	FBgn0051619	CG31619	UPSTREAM	899	TAAT	T	T	0.1538	6	33	-0.928	1.83575e-06	(TF_binding_site|BDTNP1_TFBS_z|FBsf0000196318);(TF_binding_site|mE1_TFBS_bab1|FBsf0000214155);(TF_binding_site|mE1_TFBS_kn|FBsf0000336270);(TF_binding_site|mE1_TFBS_ttk|FBsf0000335363);(transposable_element|FlyBase|FBti0062953)
3	3	2L_21685396_INS	FBgn0051619	CG31619	INTRON	0	CC	C	C	0.1538	6	33	-0.9373	1.31911e-06	(TF_binding_site|mE1_TFBS_sens|FBsf0000218627)
3	3	2L_21688370_DEL	FBgn0051619	CG31619	INTRON	0	G	GG	GG	0.1622	6	31	-0.9368	1.58338e-06	-
3	3	2L_21688611_SNP	FBgn0051619	CG31619	INTRON	0	A	C	C	0.1351	5	32	-1.001	2.15079e-06	-
3	3	2R_14271196_SNP	FBgn0034329	IM1	UPSTREAM	258	A	G	G	0.1212	4	29	-1.111	2.10116e-06	-
3	3	2R_14271196_SNP	FBgn0034328	IM23	UPSTREAM	456	A	G	G	0.1212	4	29	-1.111	2.10116e-06	-
3	3	2R_14271196_SNP	FBgn0034330	CG18107	UPSTREAM	876	A	G	G	0.1212	4	29	-1.111	2.10116e-06	-
3	3	3L_14505020_SNP	FBgn0087007	bbg	SYNONYMOUS_CODING	0	T	C	C	0.3947	15	23	-0.7302	7.99548e-07	(TF_binding_site|mE1_TFBS_sens|FBsf0000224446)
3	5	2L_14252995_SNP	Intergenic	Intergenic			A	G	G	0.1579	6	32	0.7021	1.88006e-06	(TF_binding_site|BDTNP1_TFBS_da|FBsf0000322396);(TF_binding_site|BDTNP1_TFBS_dl|FBsf0000298597);(TF_binding_site|BDTNP1_TFBS_prd|FBsf0000275050);(TF_binding_site|BDTNP1_TFBS_slp1|FBsf0000271833);(TF_binding_site|BDTNP1_TFBS_twi|FBsf0000201678);(TF_binding_site|mE1_TFBS_bab1|FBsf0000214082);(TF_binding_site|mE1_TFBS_cad|FBsf0000242110);(TF_binding_site|mE1_TFBS_HSA|FBsf0000351034)
3	5	2L_18286914_SNP	Intergenic	Intergenic			A	C	A	0.1316	5	33	0.8037	1.72812e-06	(TF_binding_site|BDTNP1_TFBS_da|FBsf0000322740)
3	5	2L_6728097_SNP	FBgn0046704	Liprin-alpha	SYNONYMOUS_CODING	0	T	C	C	0.1579	6	32	0.7139	1.72283e-06	(TF_binding_site|mE1_TFBS_chinmo|FBsf0000207391)
3	5	2L_6728997_SNP	FBgn0046704	Liprin-alpha	SYNONYMOUS_CODING	0	T	C	C	0.3243	12	25	0.5668	1.45018e-06	(TF_binding_site|mE1_TFBS_chinmo|FBsf0000207391)
3	5	2L_6735201_SNP	FBgn0031853	TTLL3B	SYNONYMOUS_CODING	0	C	T	T	0.2308	9	30	0.6263	8.7386e-07	(TF_binding_site|BDTNP1_TFBS_da|FBsf0000321705);(TF_binding_site|BDTNP1_TFBS_Med|FBsf0000277792);(TF_binding_site|BDTNP1_TFBS_sna|FBsf0000268428);(TF_binding_site|BDTNP1_TFBS_twi|FBsf0000201058)
3	5	X_14207142_DEL	Intergenic	Intergenic			CC	C	CC	0.125	5	35	0.7822	8.03004e-07	-
3	6	3L_9679419_SNP	FBgn0036030	CG6767	INTRON	0	G	T	T	0.2368	9	29	-0.5765	1.47792e-06	-
3	6	3L_9679419_SNP	FBgn0036029	CG16719	DOWNSTREAM	69	G	T	T	0.2368	9	29	-0.5765	1.47792e-06	-
4	1	3L_12695712_SNP	FBgn0014343	mirr	INTRON	0	T	G	G	0.2	8	32	3.699	2.04137e-06	(TF_binding_site|mE1_TFBS_HSA|FBsf0000364661)
4	1	3L_9005383_SNP	FBgn0035956	Doc2	DOWNSTREAM	403	T	C	C	0.35	14	26	3.104	2.00181e-06	(silencer|mE1_HDAC_PRE|FBsf0000343527);(TF_binding_site|BDTNP1_TFBS_dl|FBsf0000306385);(TF_binding_site|BDTNP1_TFBS_Med|FBsf0000282556);(TF_binding_site|BDTNP1_TFBS_twi|FBsf0000203279);(TF_binding_site|mE1_TFBS_cad|FBsf0000244558)
4	2	3L_12578294_SNP	FBgn0015904	ara	INTRON	0	T	G	G	0.15	6	34	-1.362	2.05872e-06	-
4	2	3L_21380613_SNP	FBgn0261258	rgn	INTRON	0	T	A	A	0.1	4	36	-1.624	2.00297e-06	-
4	2	3L_23075243_DEL	Intergenic	Intergenic			T	TT	TT	0.1111	4	32	-1.669	9.35752e-07	-
4	2	3L_23075249_DEL	Intergenic	Intergenic			A	ACACTTATTG	ACACTTATTG	0.1143	4	31	-1.689	6.35042e-07	-
4	2	3L_23075262_DEL	Intergenic	Intergenic			A	AAAATCCA	AAAATCCA	0.1143	4	31	-1.689	6.35042e-07	-
4	2	3L_23075274_DEL	Intergenic	Intergenic			T	TAATTTTTGAGTAGAAAC	TAATTTTTGAGTAGAAAC	0.1143	4	31	-1.667	1.28437e-06	-
4	2	3R_12540566_SNP	FBgn0003944	Ubx	INTRON	0	A	T	T	0.1	4	36	-1.624	2.00297e-06	(TF_binding_site|BDTNP1_TFBS_da|FBsf0000329524);(TF_binding_site|BDTNP1_TFBS_dl|FBsf0000312196);(TF_binding_site|BDTNP1_TFBS_twi|FBsf0000265206);(TF_binding_site|mE1_TFBS_HSA|FBsf0000372333)
4	2	3R_12540590_SNP	FBgn0003944	Ubx	INTRON	0	G	T	T	0.1	4	36	-1.624	2.00297e-06	(TF_binding_site|BDTNP1_TFBS_da|FBsf0000329524);(TF_binding_site|BDTNP1_TFBS_dl|FBsf0000312196);(TF_binding_site|BDTNP1_TFBS_twi|FBsf0000265206);(TF_binding_site|mE1_TFBS_HSA|FBsf0000372333)
4	2	3R_22035673_SNP	FBgn0265379	CR44320	INTRON	0	C	G	G	0.15	6	34	-1.367	1.81581e-06	-
4	2	3R_22035691_SNP	FBgn0265379	CR44320	INTRON	0	C	T	T	0.15	6	34	-1.367	1.81581e-06	-
4	3	3R_15468174_SNP	FBgn0038721	subdued	UTR_5_PRIME	0	T	G	G	0.425	17	23	-0.994	1.13479e-08	(TF_binding_site|BDTNP1_TFBS_dl|FBsf0000312849);(TF_binding_site|BDTNP1_TFBS_twi|FBsf0000265493);(TF_binding_site|mE1_TFBS_HSA|FBsf0000373238);(TF_binding_site|mE1_TFBS_Ubx|FBsf0000262771)
4	3	3R_15468174_SNP	FBgn0026753	Vha13	DOWNSTREAM	566	T	G	G	0.425	17	23	-0.994	1.13479e-08	(TF_binding_site|BDTNP1_TFBS_dl|FBsf0000312849);(TF_binding_site|BDTNP1_TFBS_twi|FBsf0000265493);(TF_binding_site|mE1_TFBS_HSA|FBsf0000373238);(TF_binding_site|mE1_TFBS_Ubx|FBsf0000262771)
4	3	3R_15468196_SNP	FBgn0038721	subdued	UTR_5_PRIME	0	T	C	T	0.4103	16	23	-0.9802	5.05241e-08	(TF_binding_site|BDTNP1_TFBS_dl|FBsf0000312849);(TF_binding_site|BDTNP1_TFBS_twi|FBsf0000265493);(TF_binding_site|mE1_TFBS_HSA|FBsf0000373238);(TF_binding_site|mE1_TFBS_Ubx|FBsf0000262771)
4	3	3R_15468196_SNP	FBgn0026753	Vha13	DOWNSTREAM	544	T	C	T	0.4103	16	23	-0.9802	5.05241e-08	(TF_binding_site|BDTNP1_TFBS_dl|FBsf0000312849);(TF_binding_site|BDTNP1_TFBS_twi|FBsf0000265493);(TF_binding_site|mE1_TFBS_HSA|FBsf0000373238);(TF_binding_site|mE1_TFBS_Ubx|FBsf0000262771)
4	3	3R_15468303_SNP	FBgn0038721	subdued	UTR_5_PRIME	0	G	C	G	0.425	17	23	-0.994	1.13479e-08	(TF_binding_site|BDTNP1_TFBS_dl|FBsf0000312849);(TF_binding_site|BDTNP1_TFBS_Med|FBsf0000285915);(TF_binding_site|BDTNP1_TFBS_twi|FBsf0000265493);(TF_binding_site|mE1_TFBS_HSA|FBsf0000373238);(TF_binding_site|mE1_TFBS_Ubx|FBsf0000262771)
4	3	3R_15468303_SNP	FBgn0026753	Vha13	DOWNSTREAM	437	G	C	G	0.425	17	23	-0.994	1.13479e-08	(TF_binding_site|BDTNP1_TFBS_dl|FBsf0000312849);(TF_binding_site|BDTNP1_TFBS_Med|FBsf0000285915);(TF_binding_site|BDTNP1_TFBS_twi|FBsf0000265493);(TF_binding_site|mE1_TFBS_HSA|FBsf0000373238);(TF_binding_site|mE1_TFBS_Ubx|FBsf0000262771)
4	3	3R_15468608_SNP	FBgn0026753	Vha13	DOWNSTREAM	132	T	A	T	0.375	15	25	-0.946	2.31683e-07	(TF_binding_site|BDTNP1_TFBS_dl|FBsf0000312849);(TF_binding_site|BDTNP1_TFBS_Med|FBsf0000285915);(TF_binding_site|BDTNP1_TFBS_twi|FBsf0000265493);(TF_binding_site|mE1_TFBS_h|FBsf0000257479);(TF_binding_site|mE1_TFBS_HSA|FBsf0000373238);(TF_binding_site|mE1_TFBS_Ubx|FBsf0000262771)
4	3	3R_15468608_SNP	FBgn0038721	subdued	UPSTREAM	164	T	A	T	0.375	15	25	-0.946	2.31683e-07	(TF_binding_site|BDTNP1_TFBS_dl|FBsf0000312849);(TF_binding_site|BDTNP1_TFBS_Med|FBsf0000285915);(TF_binding_site|BDTNP1_TFBS_twi|FBsf0000265493);(TF_binding_site|mE1_TFBS_h|FBsf0000257479);(TF_binding_site|mE1_TFBS_HSA|FBsf0000373238);(TF_binding_site|mE1_TFBS_Ubx|FBsf0000262771)
4	3	3R_15468938_SNP	FBgn0026753	Vha13	DOWNSTREAM	42	C	G	G	0.375	15	25	-0.946	2.31683e-07	(TF_binding_site|BDTNP1_TFBS_da|FBsf0000329834);(TF_binding_site|BDTNP1_TFBS_dl|FBsf0000312850);(TF_binding_site|BDTNP1_TFBS_Med|FBsf0000285915);(TF_binding_site|BDTNP1_TFBS_twi|FBsf0000265493);(TF_binding_site|mE1_TFBS_HSA|FBsf0000373238);(TF_binding_site|mE1_TFBS_HSA|FBsf0000373239);(TF_binding_site|mE1_TFBS_Ubx|FBsf0000262771)
4	3	3R_15468938_SNP	FBgn0038721	subdued	UPSTREAM	494	C	G	G	0.375	15	25	-0.946	2.31683e-07	(TF_binding_site|BDTNP1_TFBS_da|FBsf0000329834);(TF_binding_site|BDTNP1_TFBS_dl|FBsf0000312850);(TF_binding_site|BDTNP1_TFBS_Med|FBsf0000285915);(TF_binding_site|BDTNP1_TFBS_twi|FBsf0000265493);(TF_binding_site|mE1_TFBS_HSA|FBsf0000373238);(TF_binding_site|mE1_TFBS_HSA|FBsf0000373239);(TF_binding_site|mE1_TFBS_Ubx|FBsf0000262771)
4	3	3R_21964182_SNP	Intergenic	Intergenic			C	G	G	0.2564	10	29	1.05	3.63906e-07	-
4	6	3R_24994230_SNP	FBgn0039645	CG11898	INTRON	0	C	T	T	0.4054	15	22	-0.7288	2.02853e-06	-
4	7	2L_19585745_SNP	FBgn0032814	CG10366	SYNONYMOUS_CODING	0	A	T	A	0.4872	19	20	-0.6195	1.40664e-06	(TF_binding_site|mE1_TFBS_cad|FBsf0000242441);(TF_binding_site|mE1_TFBS_chinmo|FBsf0000207859)
4	7	2L_19585745_SNP	FBgn0000464	Lar	UPSTREAM	878	A	T	A	0.4872	19	20	-0.6195	1.40664e-06	(TF_binding_site|mE1_TFBS_cad|FBsf0000242441);(TF_binding_site|mE1_TFBS_chinmo|FBsf0000207859)
4	7	2R_16865954_SNP	FBgn0034565	CG15650	START_GAINED	0	G	A	G	0.2308	9	30	-0.773	3.74459e-07	-
4	7	2R_16865954_SNP	FBgn0034566	CG9313	UPSTREAM	452	G	A	G	0.2308	9	30	-0.773	3.74459e-07	-
4	7	2R_16865954_SNP	FBgn0034564	CG9344	DOWNSTREAM	849	G	A	G	0.2308	9	30	-0.773	3.74459e-07	-
4	7	2R_9067313_SNP	FBgn0033802	CG17724	INTRON	0	A	T	T	0.15	6	34	-0.8732	9.91795e-07	-
4	7	2R_9067313_SNP	FBgn0053182	Kdm4B	UTR_3_PRIME	0	A	T	T	0.15	6	34	-0.8732	9.91795e-07	-
4	7	2R_9067313_SNP	FBgn0028991	seq	INTRON	0	A	T	T	0.15	6	34	-0.8732	9.91795e-07	-
4	7	2R_9069501_INS	FBgn0053182	Kdm4B	INTRON	0	G	GCTGCTG	G	0.1515	5	28	-1.019	9.99018e-08	(TF_binding_site|mE1_TFBS_cad|FBsf0000246527);(TF_binding_site|mE1_TFBS_chinmo|FBsf0000211197);(TF_binding_site|mE1_TFBS_HSA|FBsf0000356252)
4	7	2R_9069501_INS	FBgn0028991	seq	CODON_INSERTION	0	G	GCTGCTG	G	0.1515	5	28	-1.019	9.99018e-08	(TF_binding_site|mE1_TFBS_cad|FBsf0000246527);(TF_binding_site|mE1_TFBS_chinmo|FBsf0000211197);(TF_binding_site|mE1_TFBS_HSA|FBsf0000356252)
4	7	2R_9069501_INS	FBgn0033802	CG17724	INTRON	0	G	GCTGCTG	G	0.1515	5	28	-1.019	9.99018e-08	(TF_binding_site|mE1_TFBS_cad|FBsf0000246527);(TF_binding_site|mE1_TFBS_chinmo|FBsf0000211197);(TF_binding_site|mE1_TFBS_HSA|FBsf0000356252)
4	7	X_4528294_SNP	FBgn0025388	CG12179	NON_SYNONYMOUS_CODING	0	T	C	C	0.25	8	24	-0.8119	6.78342e-07	(TF_binding_site|mE1_TFBS_sens|FBsf0000219602)
4	8	3L_22545846_SNP	FBgn0037170	Trxr-2	DOWNSTREAM	727	G	A	A	0.4444	16	20	0.6095	6.77783e-07	-
4	8	3L_22975556_SNP	Intergenic	Intergenic			G	T	T	0.3784	14	23	0.6186	5.77533e-07	-
4	9	2R_14325001_SNP	FBgn0050118	CG30118	INTRON	0	C	A	A	0.4103	16	23	0.5733	1.31654e-06	(TF_binding_site|BDTNP1_TFBS_dl|FBsf0000303051);(TF_binding_site|BDTNP1_TFBS_Med|FBsf0000280823);(TF_binding_site|BDTNP1_TFBS_twi|FBsf0000199753)
4	9	3R_17249305_SNP	FBgn0008651	lbl	INTRON	0	G	T	T	0.225	9	31	-0.6537	1.81801e-06	(regulatory_region|REDfly_CRMs|FBsf0000436834);(TF_binding_site|BDTNP1_TFBS_da|FBsf0000329993)
4	10	2L_10513471_SNP	FBgn0021953	Fatp	SYNONYMOUS_CODING	0	C	T	C	0.2051	8	31	0.6637	2.08821e-07	(TF_binding_site|mE1_TFBS_cad|FBsf0000241830)
4	10	2L_10513471_SNP	FBgn0266458	CG45083	UTR_3_PRIME	0	C	T	C	0.2051	8	31	0.6637	2.08821e-07	(TF_binding_site|mE1_TFBS_cad|FBsf0000241830)
4	10	2R_10290718_SNP	Intergenic	Intergenic			G	A	G	0.2308	9	30	0.611	8.11423e-07	-
4	10	2R_7219071_SNP	FBgn0003382	sha	SYNONYMOUS_CODING	0	A	C	A	0.2821	11	28	0.5614	1.5545e-06	-
4	10	2R_9272447_SNP	Intergenic	Intergenic			C	T	T	0.2432	9	28	0.6034	1.66021e-06	-
4	10	3L_13914466_SNP	FBgn0026376	Rgl	INTRON	0	A	G	G	0.2778	10	26	0.6085	6.44522e-07	(TF_binding_site|BDTNP1_TFBS_dl|FBsf0000307305);(TF_binding_site|BDTNP1_TFBS_twi|FBsf0000203737);(TF_binding_site|mE1_TFBS_kn|FBsf0000336501);(TF_binding_site|mE1_TFBS_zfh1|FBsf0000334828)
4	10	3L_13914471_SNP	FBgn0026376	Rgl	INTRON	0	T	C	C	0.2778	10	26	0.6085	6.44522e-07	(TF_binding_site|BDTNP1_TFBS_dl|FBsf0000307305);(TF_binding_site|BDTNP1_TFBS_twi|FBsf0000203737);(TF_binding_site|mE1_TFBS_kn|FBsf0000336501);(TF_binding_site|mE1_TFBS_zfh1|FBsf0000334828)
4	10	3L_9603776_SNP	FBgn0036017	CG3280	INTRON	0	A	G	G	0.2895	11	27	0.5422	7.24072e-07	-
4	10	3R_20361142_SNP	FBgn0262167	ana1	SYNONYMOUS_CODING	0	A	C	A	0.1538	6	33	0.7114	1.25282e-06	(TF_binding_site|mE1_TFBS_sens|FBsf0000233353)
4	10	3R_20361142_SNP	FBgn0039207	CG5789	DOWNSTREAM	784	A	C	A	0.1538	6	33	0.7114	1.25282e-06	(TF_binding_site|mE1_TFBS_sens|FBsf0000233353)
4	11	2R_18051208_SNP	FBgn0000008	a	INTRON	0	G	T	T	0.4359	17	22	0.4837	1.84166e-06	(TF_binding_site|mE1_TFBS_cad|FBsf0000247237)
4	11	2R_18051208_SNP	FBgn0085235	CG34206	DOWNSTREAM	35	G	T	T	0.4359	17	22	0.4837	1.84166e-06	(TF_binding_site|mE1_TFBS_cad|FBsf0000247237)
5	1	2L_5081174_SNP	FBgn0031681	pgant5	INTRON	0	C	G	G	0.25	10	30	2.805	1.08159e-06	-
5	1	2L_5081181_SNP	FBgn0031681	pgant5	INTRON	0	T	A	A	0.25	10	30	2.805	1.08159e-06	-
5	1	2L_5081184_SNP	FBgn0031681	pgant5	INTRON	0	C	T	T	0.25	10	30	2.805	1.08159e-06	-
5	1	3R_12963589_SNP	FBgn0038485	CG5255	UPSTREAM	26	C	A	A	0.275	11	29	2.619	1.81273e-06	-
5	1	3R_12963589_SNP	FBgn0038484	CG5246	DOWNSTREAM	672	C	A	A	0.275	11	29	2.619	1.81273e-06	-
5	1	3R_3491345_SNP	FBgn0051146	Nlg1	INTRON	0	G	A	A	0.1765	6	28	3.427	9.56893e-07	-
5	2	2L_10283409_SNP	FBgn0032208	CG5604	SYNONYMOUS_CODING	0	A	G	G	0.325	13	27	-0.9871	2.10819e-06	(TF_binding_site|mE1_TFBS_cad|FBsf0000241808);(TF_binding_site|mE1_TFBS_sens|FBsf0000217104)
5	2	2L_10283424_SNP	FBgn0032208	CG5604	SYNONYMOUS_CODING	0	A	G	G	0.3077	12	27	-1.077	2.43411e-07	(TF_binding_site|mE1_TFBS_cad|FBsf0000241808);(TF_binding_site|mE1_TFBS_sens|FBsf0000217104)
5	3	3L_7441968_SNP	FBgn0259935	CG42458	INTRON	0	A	G	A	0.4167	15	21	0.8303	2.02527e-06	-
5	4	2R_9318784_SNP	FBgn0259221	CG42321	INTRON	0	T	G	G	0.2647	9	25	0.8834	3.53074e-08	(TF_binding_site|BDTNP1_TFBS_dl|FBsf0000301868)
5	4	2R_9318784_SNP	FBgn0011883	tRNA:I:49Fc	UPSTREAM	6	T	G	G	0.2647	9	25	0.8834	3.53074e-08	(TF_binding_site|BDTNP1_TFBS_dl|FBsf0000301868)
5	4	2R_9318784_SNP	FBgn0011882	tRNA:I:49Fb	DOWNSTREAM	222	T	G	G	0.2647	9	25	0.8834	3.53074e-08	(TF_binding_site|BDTNP1_TFBS_dl|FBsf0000301868)
5	4	2R_9318784_SNP	FBgn0011909	tRNA:L3:49Fa	UPSTREAM	464	T	G	G	0.2647	9	25	0.8834	3.53074e-08	(TF_binding_site|BDTNP1_TFBS_dl|FBsf0000301868)
5	4	2R_9318784_SNP	FBgn0011884	tRNA:I:49Fd	UPSTREAM	498	T	G	G	0.2647	9	25	0.8834	3.53074e-08	(TF_binding_site|BDTNP1_TFBS_dl|FBsf0000301868)
5	4	2R_9318784_SNP	FBgn0011885	tRNA:I:49Fe	UPSTREAM	814	T	G	G	0.2647	9	25	0.8834	3.53074e-08	(TF_binding_site|BDTNP1_TFBS_dl|FBsf0000301868)
5	4	2R_9318784_SNP	FBgn0011881	tRNA:I:49Fa	UPSTREAM	924	T	G	G	0.2647	9	25	0.8834	3.53074e-08	(TF_binding_site|BDTNP1_TFBS_dl|FBsf0000301868)
5	6	2L_13113657_SNP	Intergenic	Intergenic			T	C	C	0.3333	12	24	0.6347	1.022e-06	(TF_binding_site|mE1_TFBS_HSA|FBsf0000350709);(TF_binding_site|mE1_TFBS_Trl|FBsf0000337587)
5	6	2L_5650787_SNP	FBgn0051646	CG31646	INTRON	0	G	A	A	0.2564	10	29	0.6591	7.16997e-07	-
5	6	2R_9399095_SNP	FBgn0033846	mip120	NON_SYNONYMOUS_CODING	0	A	G	G	0.1282	5	34	0.8453	1.82227e-06	(TF_binding_site|mE1_TFBS_cad|FBsf0000246555);(TF_binding_site|mE1_TFBS_HSA|FBsf0000356367);(TF_binding_site|mE1_TFBS_sens|FBsf0000227821)
5	6	3L_8948548_SNP	FBgn0040321	GNBP3	SYNONYMOUS_CODING	0	T	G	G	0.1795	7	32	0.754	7.43973e-07	(TF_binding_site|mE1_TFBS_chinmo|FBsf0000209997);(TF_binding_site|mE1_TFBS_HSA|FBsf0000363482);(TF_binding_site|mE1_TFBS_sens|FBsf0000223612)
5	6	3L_8948548_SNP	FBgn0264307	orb2	UPSTREAM	985	T	G	G	0.1795	7	32	0.754	7.43973e-07	(TF_binding_site|mE1_TFBS_chinmo|FBsf0000209997);(TF_binding_site|mE1_TFBS_HSA|FBsf0000363482);(TF_binding_site|mE1_TFBS_sens|FBsf0000223612)
5	6	3R_25352466_SNP	Intergenic	Intergenic			C	G	G	0.175	7	33	0.7858	1.47563e-07	(TF_binding_site|mE1_TFBS_inv|FBsf0000237651)
5	7	2L_2844907_SNP	FBgn0031470	CG18557	NON_SYNONYMOUS_CODING	0	C	A	A	0.4412	15	19	0.5801	5.06859e-07	(TF_binding_site|mE1_TFBS_cad|FBsf0000241198)
5	7	2L_2844907_SNP	FBgn0031469	CG18558	UPSTREAM	394	C	A	A	0.4412	15	19	0.5801	5.06859e-07	(TF_binding_site|mE1_TFBS_cad|FBsf0000241198)
5	7	2L_9714962_SNP	FBgn0028704	Nckx30C	UTR_3_PRIME	0	A	C	A	0.4375	14	18	-0.6031	1.15142e-06	(TF_binding_site|BDTNP1_TFBS_dl|FBsf0000297764);(TF_binding_site|mE1_TFBS_HSA|FBsf0000347154)
5	7	3R_14555757_SNP	FBgn0000303	Cha	INTRON	0	T	C	T	0.35	14	26	0.5621	4.05603e-07	(TF_binding_site|mE1_TFBS_chinmo|FBsf0000212914)
5	7	3R_14555781_SNP	FBgn0000303	Cha	INTRON	0	T	A	T	0.3333	13	26	0.5796	3.18882e-07	(TF_binding_site|mE1_TFBS_chinmo|FBsf0000212914)
5	7	3R_14555782_SNP	FBgn0000303	Cha	INTRON	0	T	C	T	0.35	14	26	0.5621	4.05603e-07	(TF_binding_site|mE1_TFBS_chinmo|FBsf0000212914)
5	7	3R_14555783_DEL	FBgn0000303	Cha	INTRON	0	AA	A	AA	0.35	14	26	0.5621	4.05603e-07	(TF_binding_site|mE1_TFBS_chinmo|FBsf0000212914)
5	7	3R_14555789_DEL	FBgn0000303	Cha	INTRON	0	TTAATCTGTCGGTTTCATCGT	T	TTAATCTGTCGGTTTCATCGT	0.35	14	26	0.5621	4.05603e-07	(TF_binding_site|mE1_TFBS_chinmo|FBsf0000212914)
5	7	3R_14555820_DEL	FBgn0000303	Cha	INTRON	0	TTC	T	TTC	0.35	14	26	0.5621	4.05603e-07	(TF_binding_site|mE1_TFBS_chinmo|FBsf0000212914)
5	7	3R_20686414_SNP	FBgn0265266	CG13639	UPSTREAM	326	G	A	A	0.2564	10	29	-0.6136	8.76951e-07	-
5	7	3R_20686414_SNP	FBgn0051105	ppk22	UPSTREAM	891	G	A	A	0.2564	10	29	-0.6136	8.76951e-07	-
5	7	3R_20686414_SNP	FBgn0039237	CG13640	DOWNSTREAM	967	G	A	A	0.2564	10	29	-0.6136	8.76951e-07	-
6	1	2L_16161633_SNP	Intergenic	Intergenic			C	G	G	0.1579	6	32	2.335	1.53929e-06	-
6	1	3L_3585316_SNP	FBgn0005640	Eip63E	INTRON	0	A	T	T	0.1579	6	32	2.365	9.58845e-07	-
6	2	2L_11227481_SNP	FBgn0264442	ab	INTRON	0	A	G	G	0.1176	4	30	-1.174	4.53064e-07	-
6	2	2L_11345868_INS	Intergenic	Intergenic			CC	C	C	0.1316	5	33	-1.038	9.10053e-07	-
6	2	2L_15638779_SNP	Intergenic	Intergenic			A	G	G	0.1	4	36	-1.211	7.89889e-08	-
6	2	2L_5475533_SNP	Intergenic	Intergenic			A	C	A	0.125	5	35	-1.02	1.42073e-06	-
6	2	2L_7584842_DEL	Intergenic	Intergenic			A	ATGAAGCACTTTCA	ATGAAGCACTTTCA	0.1053	4	34	-1.221	6.36172e-08	(TF_binding_site|BDTNP1_TFBS_da|FBsf0000321844);(TF_binding_site|BDTNP1_TFBS_dl|FBsf0000297332);(TF_binding_site|BDTNP1_TFBS_gt|FBsf0000293107);(TF_binding_site|BDTNP1_TFBS_Med|FBsf0000277912);(TF_binding_site|BDTNP1_TFBS_prd|FBsf0000274908);(TF_binding_site|BDTNP1_TFBS_twi|FBsf0000201155);(TF_binding_site|mE1_TFBS_HSA|FBsf0000346485);(TF_binding_site|mE1_TFBS_sens|FBsf0000216654)
6	2	2L_7586579_SNP	Intergenic	Intergenic			T	C	C	0.1026	4	35	-1.157	5.45877e-07	-
6	2	2L_9686164_INS	FBgn0000273	Pka-C1	INTRON	0	AA	A	A	0.1	4	36	-1.158	4.95139e-07	(TF_binding_site|BDTNP1_TFBS_dl|FBsf0000297752);(TF_binding_site|BDTNP1_TFBS_Med|FBsf0000278139);(TF_binding_site|mE1_TFBS_HSA|FBsf0000347144)
6	2	2L_9945958_SNP	FBgn0032167	CG5853	INTRON	0	T	G	G	0.1	4	36	-1.139	9.40934e-07	(TF_binding_site|BDTNP1_TFBS_da|FBsf0000322081);(TF_binding_site|BDTNP1_TFBS_twi|FBsf0000201366);(TF_binding_site|mE1_TFBS_HSA|FBsf0000347218)
6	2	2R_10381052_SNP	FBgn0001332	L	INTRON	0	T	C	C	0.1282	5	34	-1.04	7.35206e-07	(TF_binding_site|mE1_TFBS_cad|FBsf0000246656)
6	2	2R_15027781_SNP	FBgn0034419	CG15111	SYNONYMOUS_CODING	0	A	G	G	0.1	4	36	-1.192	1.59264e-07	(TF_binding_site|mE1_TFBS_sens|FBsf0000228846)
6	2	2R_15027814_SNP	FBgn0034419	CG15111	SYNONYMOUS_CODING	0	T	G	G	0.1	4	36	-1.192	1.59264e-07	(TF_binding_site|mE1_TFBS_sens|FBsf0000228846)
6	2	2R_15027847_SNP	FBgn0034419	CG15111	SYNONYMOUS_CODING	0	G	C	C	0.1026	4	35	-1.224	5.24295e-08	(TF_binding_site|mE1_TFBS_sens|FBsf0000228846)
6	2	2R_15027856_SNP	FBgn0034419	CG15111	SYNONYMOUS_CODING	0	G	A	A	0.15	6	34	-1.056	1.22362e-08	(TF_binding_site|mE1_TFBS_sens|FBsf0000228846)
6	2	2R_17462665_SNP	FBgn0034636	CG10440	INTRON	0	C	T	C	0.1	4	36	-1.297	1.99048e-09	-
6	2	2R_4104243_SNP	FBgn0053087	LRP1	NON_SYNONYMOUS_CODING	0	G	A	A	0.2105	8	30	-0.8566	9.96977e-07	(TF_binding_site|mE1_TFBS_cad|FBsf0000246058)
6	2	2R_4104506_SNP	FBgn0053087	LRP1	SYNONYMOUS_CODING	0	T	C	C	0.2308	9	30	-0.7998	2.12333e-06	(TF_binding_site|mE1_TFBS_cad|FBsf0000246058)
6	2	2R_4104512_SNP	FBgn0053087	LRP1	SYNONYMOUS_CODING	0	A	G	G	0.2308	9	30	-0.7998	2.12333e-06	(TF_binding_site|mE1_TFBS_cad|FBsf0000246058)
6	2	2R_521882_SNP	Intergenic	Intergenic			G	C	C	0.1316	5	33	-1.101	8.40336e-08	-
6	2	2R_6015853_SNP	FBgn0050011	gem	INTRON	0	C	A	A	0.1	4	36	-1.192	1.59264e-07	(TF_binding_site|BDTNP1_TFBS_dl|FBsf0000301053);(TF_binding_site|mE1_TFBS_HSA|FBsf0000355180);(TF_binding_site|mE1_TFBS_Trl|FBsf0000338244)
6	2	3L_10489883_SNP	FBgn0052062	A2bp1	INTRON	0	A	T	T	0.1	4	36	-1.192	1.59264e-07	-
6	2	3L_10489926_DEL	FBgn0052062	A2bp1	INTRON	0	T	TGATTTCATT	TGATTTCATT	0.1	4	36	-1.192	1.59264e-07	-
6	2	3L_10489953_SNP	FBgn0052062	A2bp1	INTRON	0	G	A	A	0.1	4	36	-1.192	1.59264e-07	-
6	2	3L_10489954_SNP	FBgn0052062	A2bp1	INTRON	0	A	C	C	0.1026	4	35	-1.189	1.84913e-07	-
6	2	3L_10490013_INS	FBgn0052062	A2bp1	INTRON	0	TGAT	T	T	0.1	4	36	-1.192	1.59264e-07	-
6	2	3L_10490021_SNP	FBgn0052062	A2bp1	INTRON	0	A	C	C	0.1	4	36	-1.192	1.59264e-07	-
6	2	3L_13905065_SNP	FBgn0026376	Rgl	INTRON	0	T	A	T	0.1622	6	31	-0.9412	2.05575e-06	-
6	2	3L_2684650_SNP	FBgn0264606	Fife	SYNONYMOUS_CODING	0	T	C	C	0.1	4	36	-1.114	1.94331e-06	-
6	2	3L_2684898_SNP	FBgn0264606	Fife	INTRON	0	C	A	A	0.125	4	28	-1.292	5.76117e-09	-
6	2	3L_3116072_SNP	FBgn0026189	prominin-like	INTRON	0	A	T	T	0.15	6	34	-1.011	1.03882e-07	-
6	2	3L_3116238_SNP	FBgn0026189	prominin-like	INTRON	0	T	C	C	0.125	5	35	-1.066	2.84236e-07	-
6	2	3R_10339524_SNP	FBgn0038237	Pde6	DOWNSTREAM	99	T	A	A	0.1026	4	35	-1.159	5.22696e-07	(TF_binding_site|BDTNP1_TFBS_Med|FBsf0000285308);(TF_binding_site|mE1_TFBS_HSA|FBsf0000371567)
6	2	3R_10339524_SNP	FBgn0038235	CG8461	UPSTREAM	165	T	A	A	0.1026	4	35	-1.159	5.22696e-07	(TF_binding_site|BDTNP1_TFBS_Med|FBsf0000285308);(TF_binding_site|mE1_TFBS_HSA|FBsf0000371567)
6	2	3R_12385792_SNP	FBgn0259244	CG42342	INTRON	0	C	G	C	0.125	5	35	-1.091	1.07948e-07	(TF_binding_site|BDTNP1_TFBS_twi|FBsf0000265188)
6	2	3R_12554632_SNP	FBgn0003944	Ubx	INTRON	0	G	T	T	0.2051	8	31	-0.8828	2.8693e-07	(TF_binding_site|BDTNP1_TFBS_dl|FBsf0000312207);(TF_binding_site|BDTNP1_TFBS_ftz|FBsf0000295472);(TF_binding_site|BDTNP1_TFBS_gt|FBsf0000294453);(TF_binding_site|BDTNP1_TFBS_Med|FBsf0000285616);(TF_binding_site|BDTNP1_TFBS_twi|FBsf0000265213);(TF_binding_site|mE1_TFBS_cad|FBsf0000248553);(TF_binding_site|mE1_TFBS_HSA|FBsf0000372340)
6	2	3R_12554635_SNP	FBgn0003944	Ubx	INTRON	0	T	G	G	0.2222	8	28	-0.905	1.62961e-07	(TF_binding_site|BDTNP1_TFBS_dl|FBsf0000312207);(TF_binding_site|BDTNP1_TFBS_ftz|FBsf0000295472);(TF_binding_site|BDTNP1_TFBS_gt|FBsf0000294453);(TF_binding_site|BDTNP1_TFBS_Med|FBsf0000285616);(TF_binding_site|BDTNP1_TFBS_twi|FBsf0000265213);(TF_binding_site|mE1_TFBS_cad|FBsf0000248553);(TF_binding_site|mE1_TFBS_HSA|FBsf0000372340)
6	2	3R_12554677_INS	FBgn0003944	Ubx	INTRON	0	TT	T	T	0.2286	8	27	-0.8629	1.15302e-06	(TF_binding_site|BDTNP1_TFBS_da|FBsf0000329533);(TF_binding_site|BDTNP1_TFBS_dl|FBsf0000312207);(TF_binding_site|BDTNP1_TFBS_ftz|FBsf0000295472);(TF_binding_site|BDTNP1_TFBS_gt|FBsf0000294453);(TF_binding_site|BDTNP1_TFBS_Med|FBsf0000285616);(TF_binding_site|BDTNP1_TFBS_twi|FBsf0000265213);(TF_binding_site|mE1_TFBS_cad|FBsf0000248553);(TF_binding_site|mE1_TFBS_HSA|FBsf0000372340)
6	2	3R_12968390_SNP	FBgn0038487	TwdlW	UPSTREAM	264	T	G	T	0.1795	7	32	-1.03	1.62202e-09	-
6	2	3R_12968433_INS	FBgn0038487	TwdlW	UPSTREAM	308	AGCAGTTA	A	A	0.2	8	32	-0.8585	6.82039e-07	-
6	2	3R_12968434_DEL	FBgn0038487	TwdlW	UPSTREAM	309	A	ACATTTGCCT	ACATTTGCCT	0.1795	7	32	-0.9237	3.44748e-07	-
6	2	3R_13192260_DEL	FBgn0038498	beat-IIa	UPSTREAM	420	A	AA	AA	0.125	5	35	-1.02	1.42073e-06	-
6	2	3R_13192277_SNP	FBgn0038498	beat-IIa	UPSTREAM	436	T	A	A	0.1026	4	35	-1.12	1.72314e-06	-
6	2	3R_13192389_SNP	FBgn0038498	beat-IIa	UPSTREAM	548	T	G	G	0.125	5	35	-1.02	1.42073e-06	-
6	2	3R_13192442_SNP	FBgn0038498	beat-IIa	UPSTREAM	601	C	T	T	0.125	5	35	-1.02	1.42073e-06	-
6	2	3R_13197371_SNP	FBgn0265196	CR44256	EXON	0	T	G	G	0.1282	5	34	-1.016	1.62546e-06	-
6	2	3R_14466029_SNP	FBgn0263974	qin	INTRON	0	A	T	A	0.1429	5	30	-1.124	4.24774e-08	-
6	2	3R_14466029_SNP	FBgn0038632	CG14301	INTRON	0	A	T	A	0.1429	5	30	-1.124	4.24774e-08	-
6	2	3R_14467251_INS	FBgn0263974	qin	INTRON	0	CC	C	C	0.1667	6	30	-0.9598	1.15722e-06	(TF_binding_site|BDTNP1_TFBS_z|FBsf0000197729)
6	2	3R_14467251_INS	FBgn0038632	CG14301	UPSTREAM	73	CC	C	C	0.1667	6	30	-0.9598	1.15722e-06	(TF_binding_site|BDTNP1_TFBS_z|FBsf0000197729)
6	2	3R_14467315_SNP	FBgn0263974	qin	INTRON	0	G	A	A	0.1282	5	34	-1.045	6.64921e-07	(TF_binding_site|BDTNP1_TFBS_z|FBsf0000197729)
6	2	3R_14467315_SNP	FBgn0038632	CG14301	UPSTREAM	136	G	A	A	0.1282	5	34	-1.045	6.64921e-07	(TF_binding_site|BDTNP1_TFBS_z|FBsf0000197729)
6	2	3R_14771411_SNP	FBgn0261262	CG42613	INTRON	0	T	C	C	0.1316	5	33	-1.015	1.90692e-06	-
6	2	3R_16070283_SNP	FBgn0083975	Nlg4	UTR_3_PRIME	0	T	C	C	0.1026	4	35	-1.115	1.88263e-06	(TF_binding_site|BDTNP1_TFBS_sna|FBsf0000271181)
6	2	3R_17375120_SNP	FBgn0002941	slou	INTRON	0	T	G	G	0.1	4	36	-1.211	7.89889e-08	(TF_binding_site|mE1_TFBS_HSA|FBsf0000373829)
6	2	3R_17721310_SNP	FBgn0038917	CG6678	INTRON	0	T	A	T	0.1	4	36	-1.123	1.40997e-06	-
6	2	3R_18687209_SNP	Intergenic	Intergenic			T	C	C	0.1026	4	35	-1.134	1.08341e-06	-
6	2	3R_18687796_SNP	Intergenic	Intergenic			T	G	G	0.1	4	36	-1.123	1.40997e-06	-
6	2	3R_18687797_SNP	Intergenic	Intergenic			C	T	T	0.1	4	36	-1.123	1.40997e-06	-
6	2	3R_18687852_SNP	Intergenic	Intergenic			A	C	C	0.1	4	36	-1.123	1.40997e-06	-
6	2	3R_18687862_SNP	Intergenic	Intergenic			C	A	A	0.1	4	36	-1.123	1.40997e-06	-
6	2	3R_20376670_SNP	FBgn0266758	Esyt2	INTRON	0	A	C	C	0.1282	5	34	-1.046	5.86954e-07	-
6	2	X_11305887_SNP	FBgn0030297	Gr10b	UTR_3_PRIME	0	T	C	C	0.15	6	34	-0.9855	2.89982e-07	-
6	2	X_11305887_SNP	FBgn0030296	CG15196	DOWNSTREAM	187	T	C	C	0.15	6	34	-0.9855	2.89982e-07	-
6	2	X_11305900_SNP	FBgn0030297	Gr10b	UTR_3_PRIME	0	G	A	A	0.15	6	34	-0.9855	2.89982e-07	-
6	2	X_11305900_SNP	FBgn0030296	CG15196	DOWNSTREAM	200	G	A	A	0.15	6	34	-0.9855	2.89982e-07	-
6	2	X_11306086_SNP	FBgn0030297	Gr10b	SYNONYMOUS_CODING	0	C	T	T	0.125	5	35	-1.009	1.96198e-06	-
6	2	X_11306086_SNP	FBgn0030296	CG15196	DOWNSTREAM	386	C	T	T	0.125	5	35	-1.009	1.96198e-06	-
6	2	X_11306117_SNP	FBgn0030297	Gr10b	INTRON	0	G	A	A	0.125	5	35	-1.009	1.96198e-06	-
6	2	X_11306117_SNP	FBgn0030296	CG15196	DOWNSTREAM	417	G	A	A	0.125	5	35	-1.009	1.96198e-06	-
6	2	X_7454652_SNP	Intergenic	Intergenic			C	T	T	0.1	4	36	-1.297	1.99048e-09	-
6	4	2L_10971937_SNP	FBgn0032321	YL-1	DOWNSTREAM	67	T	A	A	0.475	19	21	-0.5913	4.1388e-07	-
6	4	2L_10971937_SNP	FBgn0032322	CG16743	UPSTREAM	343	T	A	A	0.475	19	21	-0.5913	4.1388e-07	-
6	4	2L_10971944_SNP	FBgn0032321	YL-1	DOWNSTREAM	74	T	G	G	0.475	19	21	0.5913	4.1388e-07	-
6	4	2L_10971944_SNP	FBgn0032322	CG16743	UPSTREAM	336	T	G	G	0.475	19	21	0.5913	4.1388e-07	-
6	4	X_13629600_SNP	FBgn0001087	g	INTRON	0	G	A	G	0.4211	16	22	0.6082	5.41731e-07	(TF_binding_site|BDTNP1_TFBS_da|FBsf0000332561);(TF_binding_site|BDTNP1_TFBS_dl|FBsf0000318903);(TF_binding_site|BDTNP1_TFBS_twi|FBsf0000263233);(TF_binding_site|mE1_TFBS_hkb|FBsf0000256110);(TF_binding_site|mE1_TFBS_HSA|FBsf0000382234)
6	5	3R_24787745_SNP	FBgn0039617	CG14521	INTRON	0	T	C	T	0.4865	18	19	-0.5051	7.04309e-07	-
7	1	2L_5908404_SNP	FBgn0043362	bchs	SYNONYMOUS_CODING	0	C	T	T	0.2308	9	30	-3.383	5.44023e-07	(TF_binding_site|BDTNP1_TFBS_dl|FBsf0000296901);(TF_binding_site|BDTNP1_TFBS_twi|FBsf0000200956);(TF_binding_site|mE1_TFBS_Trl|FBsf0000337255)
7	1	2L_5908404_SNP	FBgn0031749	CG14000	DOWNSTREAM	523	C	T	T	0.2308	9	30	-3.383	5.44023e-07	(TF_binding_site|BDTNP1_TFBS_dl|FBsf0000296901);(TF_binding_site|BDTNP1_TFBS_twi|FBsf0000200956);(TF_binding_site|mE1_TFBS_Trl|FBsf0000337255)
7	1	2R_7205755_SNP	FBgn0016047	nompA	INTRON	0	T	G	G	0.1892	7	30	-3.592	1.20792e-06	-
7	1	2R_7206103_SNP	FBgn0016047	nompA	UPSTREAM	989	A	T	T	0.125	5	35	-4.19	7.83457e-07	-
7	1	3L_12275370_INS	FBgn0036273	CG10426	DOWNSTREAM	795	ATTTATGGTAGA	A	A	0.5	20	20	-2.747	1.77891e-06	-
7	1	3R_15466678_DEL	FBgn0038721	subdued	INTRON	0	CC	AAA	AAA	0.1622	6	31	-3.835	1.05778e-06	(TF_binding_site|BDTNP1_TFBS_dl|FBsf0000312848);(TF_binding_site|mE1_TFBS_Trl|FBsf0000341387)
7	1	3R_22754503_SNP	FBgn0015541	sda	INTRON	0	C	G	G	0.1795	7	32	-3.726	1.19865e-06	-
7	1	3R_23119131_INS	FBgn0039510	CG3339	DOWNSTREAM	876	AC	A	A	0.3056	11	25	-3.269	5.11243e-07	-
7	1	3R_27186292_SNP	FBgn0085376	CG34347	INTRON	0	T	C	C	0.359	14	25	2.886	2.09194e-06	-
7	1	3R_27186299_MNP	FBgn0085376	CG34347	INTRON	0	AGGGTA	CTAAAT	CTAAAT	0.3333	13	26	2.971	1.64343e-06	-
7	1	3R_27186307_MNP	FBgn0085376	CG34347	INTRON	0	TCTT	CTAA	CTAA	0.35	14	26	2.906	1.37992e-06	-
7	1	3R_27186313_DEL	FBgn0085376	CG34347	INTRON	0	G	GGA	GGA	0.35	14	26	2.906	1.37992e-06	-
7	1	3R_27186317_SNP	FBgn0085376	CG34347	INTRON	0	G	A	A	0.35	14	26	2.906	1.37992e-06	-
7	1	3R_27186318_SNP	FBgn0085376	CG34347	INTRON	0	T	G	G	0.35	14	26	2.906	1.37992e-06	-
7	1	X_6914612_SNP	Intergenic	Intergenic			C	A	A	0.3077	12	27	-2.981	1.9327e-06	-
7	2	2R_1698506_SNP	FBgn0085414	dpr12	INTRON	0	A	C	C	0.359	14	25	-1.03	2.61457e-07	(TF_binding_site|BDTNP1_TFBS_twi|FBsf0000198505)
7	2	3L_18783908_SNP	FBgn0001078	ftz-f1	INTRON	0	A	G	A	0.4324	16	21	0.9963	5.77439e-07	-
7	2	3L_18783929_SNP	FBgn0001078	ftz-f1	INTRON	0	T	G	T	0.4444	16	20	0.9799	1.55692e-06	-
7	3	2L_8338357_SNP	FBgn0032023	CG14274	UTR_5_PRIME	0	A	C	C	0.4615	18	21	0.8804	9.87063e-07	-
7	4	2L_19265476_SNP	Intergenic	Intergenic			T	A	A	0.15	6	34	-1.087	1.24841e-06	-
7	4	2R_13640534_SNP	FBgn0034275	CG5002	SYNONYMOUS_CODING	0	C	T	C	0.225	9	31	-0.8674	1.97826e-06	(TF_binding_site|BDTNP1_TFBS_da|FBsf0000324564);(TF_binding_site|BDTNP1_TFBS_dl|FBsf0000302866);(TF_binding_site|BDTNP1_TFBS_gt|FBsf0000293557);(TF_binding_site|BDTNP1_TFBS_kni|FBsf0000289658);(TF_binding_site|BDTNP1_TFBS_Med|FBsf0000280720);(TF_binding_site|BDTNP1_TFBS_prd|FBsf0000274495);(TF_binding_site|BDTNP1_TFBS_shn|FBsf0000273717);(TF_binding_site|BDTNP1_TFBS_sna|FBsf0000267851);(TF_bindin…
7	4	2R_13640534_SNP	FBgn0034276	CG6385	DOWNSTREAM	526	C	T	C	0.225	9	31	-0.8674	1.97826e-06	(TF_binding_site|BDTNP1_TFBS_da|FBsf0000324564);(TF_binding_site|BDTNP1_TFBS_dl|FBsf0000302866);(TF_binding_site|BDTNP1_TFBS_gt|FBsf0000293557);(TF_binding_site|BDTNP1_TFBS_kni|FBsf0000289658);(TF_binding_site|BDTNP1_TFBS_Med|FBsf0000280720);(TF_binding_site|BDTNP1_TFBS_prd|FBsf0000274495);(TF_binding_site|BDTNP1_TFBS_shn|FBsf0000273717);(TF_binding_site|BDTNP1_TFBS_sna|FBsf0000267851);(TF_bindin…
7	4	2R_13640576_SNP	FBgn0034275	CG5002	SYNONYMOUS_CODING	0	A	G	A	0.225	9	31	-0.8674	1.97826e-06	(TF_binding_site|BDTNP1_TFBS_da|FBsf0000324564);(TF_binding_site|BDTNP1_TFBS_dl|FBsf0000302866);(TF_binding_site|BDTNP1_TFBS_gt|FBsf0000293557);(TF_binding_site|BDTNP1_TFBS_kni|FBsf0000289658);(TF_binding_site|BDTNP1_TFBS_Med|FBsf0000280720);(TF_binding_site|BDTNP1_TFBS_prd|FBsf0000274495);(TF_binding_site|BDTNP1_TFBS_shn|FBsf0000273717);(TF_binding_site|BDTNP1_TFBS_sna|FBsf0000267851);(TF_bindin…
7	4	2R_13640576_SNP	FBgn0034276	CG6385	DOWNSTREAM	484	A	G	A	0.225	9	31	-0.8674	1.97826e-06	(TF_binding_site|BDTNP1_TFBS_da|FBsf0000324564);(TF_binding_site|BDTNP1_TFBS_dl|FBsf0000302866);(TF_binding_site|BDTNP1_TFBS_gt|FBsf0000293557);(TF_binding_site|BDTNP1_TFBS_kni|FBsf0000289658);(TF_binding_site|BDTNP1_TFBS_Med|FBsf0000280720);(TF_binding_site|BDTNP1_TFBS_prd|FBsf0000274495);(TF_binding_site|BDTNP1_TFBS_shn|FBsf0000273717);(TF_binding_site|BDTNP1_TFBS_sna|FBsf0000267851);(TF_bindin…
7	4	2R_13640582_SNP	FBgn0034275	CG5002	SYNONYMOUS_CODING	0	G	A	G	0.2308	9	30	-0.8654	2.11878e-06	(TF_binding_site|BDTNP1_TFBS_da|FBsf0000324564);(TF_binding_site|BDTNP1_TFBS_dl|FBsf0000302866);(TF_binding_site|BDTNP1_TFBS_gt|FBsf0000293557);(TF_binding_site|BDTNP1_TFBS_kni|FBsf0000289658);(TF_binding_site|BDTNP1_TFBS_Med|FBsf0000280720);(TF_binding_site|BDTNP1_TFBS_prd|FBsf0000274495);(TF_binding_site|BDTNP1_TFBS_shn|FBsf0000273717);(TF_binding_site|BDTNP1_TFBS_sna|FBsf0000267851);(TF_bindin…
7	4	2R_13640582_SNP	FBgn0034276	CG6385	DOWNSTREAM	478	G	A	G	0.2308	9	30	-0.8654	2.11878e-06	(TF_binding_site|BDTNP1_TFBS_da|FBsf0000324564);(TF_binding_site|BDTNP1_TFBS_dl|FBsf0000302866);(TF_binding_site|BDTNP1_TFBS_gt|FBsf0000293557);(TF_binding_site|BDTNP1_TFBS_kni|FBsf0000289658);(TF_binding_site|BDTNP1_TFBS_Med|FBsf0000280720);(TF_binding_site|BDTNP1_TFBS_prd|FBsf0000274495);(TF_binding_site|BDTNP1_TFBS_shn|FBsf0000273717);(TF_binding_site|BDTNP1_TFBS_sna|FBsf0000267851);(TF_bindin…
7	4	2R_13650103_SNP	FBgn0027572	CG5009	SYNONYMOUS_CODING	0	T	A	T	0.5	19	19	0.7796	4.46262e-07	-
7	4	3L_1996667_SNP	Intergenic	Intergenic			G	A	A	0.2105	8	30	-0.9263	1.06002e-06	-
7	4	3L_7418012_SNP	FBgn0259935	CG42458	INTRON	0	C	T	T	0.2564	10	29	-0.8642	1.45194e-06	-
7	4	3R_6722330_SNP	FBgn0267137	CR45577	EXON	0	A	C	C	0.2162	8	29	-0.9542	5.30274e-07	(TF_binding_site|BDTNP1_TFBS_sna|FBsf0000270883);(TF_binding_site|mE1_TFBS_HSA|FBsf0000370468)
7	4	3R_6722330_SNP	FBgn0037856	Leash	DOWNSTREAM	190	A	C	C	0.2162	8	29	-0.9542	5.30274e-07	(TF_binding_site|BDTNP1_TFBS_sna|FBsf0000270883);(TF_binding_site|mE1_TFBS_HSA|FBsf0000370468)
7	6	2L_12396250_SNP	FBgn0262475	bru-2	INTRON	0	A	C	C	0.1026	4	35	1.073	1.87882e-06	(TF_binding_site|mE1_TFBS_HSA|FBsf0000350517);(TF_binding_site|mE1_TFBS_sbb|FBsf0000249885)
7	6	2L_12859900_SNP	Intergenic	Intergenic			A	G	G	0.1562	5	27	1.005	1.49999e-06	(TF_binding_site|BDTNP1_TFBS_da|FBsf0000322302);(TF_binding_site|mE1_TFBS_inv|FBsf0000234900)
7	6	2L_4322530_SNP	FBgn0010473	tutl	UTR_3_PRIME	0	A	C	C	0.15	6	34	0.9313	1.87535e-06	(TF_binding_site|mE1_TFBS_HSA|FBsf0000345243);(TF_binding_site|mE1_TFBS_sens|FBsf0000215964)
7	6	2L_4324807_SNP	FBgn0028482	CG16857	UTR_5_PRIME	0	A	G	G	0.1538	6	33	0.9859	2.60227e-07	-
7	6	2L_4324951_SNP	FBgn0028482	CG16857	NON_SYNONYMOUS_CODING	0	A	C	C	0.15	6	34	0.9825	2.73464e-07	-
7	6	2L_5265806_SNP	FBgn0031693	Cyp4ac1	UTR_3_PRIME	0	T	C	C	0.1026	4	35	1.139	1.26387e-06	(TF_binding_site|mE1_TFBS_hkb|FBsf0000255029);(TF_binding_site|mE1_TFBS_HSA|FBsf0000345613)
7	6	2L_5265806_SNP	FBgn0003716	tkv	INTRON	0	T	C	C	0.1026	4	35	1.139	1.26387e-06	(TF_binding_site|mE1_TFBS_hkb|FBsf0000255029);(TF_binding_site|mE1_TFBS_HSA|FBsf0000345613)
7	6	2L_5265806_SNP	FBgn0031694	Cyp4ac2	UPSTREAM	586	T	C	C	0.1026	4	35	1.139	1.26387e-06	(TF_binding_site|mE1_TFBS_hkb|FBsf0000255029);(TF_binding_site|mE1_TFBS_HSA|FBsf0000345613)
7	6	2R_16326340_SNP	FBgn0086604	CG12484	INTRON	0	A	G	G	0.15	6	34	0.9394	1.22689e-06	-
7	6	2R_18151921_INS	FBgn0020307	dve	INTRON	0	AT	A	A	0.2	7	28	0.9484	2.99053e-07	-
7	6	2R_6893825_INS	FBgn0040765	luna	INTRON	0	TT	T	T	0.1081	4	33	1.164	5.86981e-07	-
7	6	2R_6893862_SNP	FBgn0040765	luna	INTRON	0	A	C	C	0.1053	4	34	1.146	1.00998e-06	-
7	6	3L_16569904_SNP	FBgn0036640	nxf2	DOWNSTREAM	55	A	C	C	0.1351	5	32	1.008	2.06499e-06	-
7	6	3L_16569904_SNP	FBgn0262732	mbf1	DOWNSTREAM	396	A	C	C	0.1351	5	32	1.008	2.06499e-06	-
7	6	3L_18989334_SNP	FBgn0036837	CG18135	INTRON	0	T	G	G	0.1026	4	35	1.138	1.36212e-06	(TF_binding_site|mE1_TFBS_Trl|FBsf0000340293)
7	6	3L_18989336_SNP	FBgn0036837	CG18135	INTRON	0	C	G	G	0.1026	4	35	1.138	1.36212e-06	(TF_binding_site|mE1_TFBS_Trl|FBsf0000340293)
7	6	3L_18989343_SNP	FBgn0036837	CG18135	INTRON	0	G	C	C	0.1026	4	35	1.138	1.36212e-06	(TF_binding_site|mE1_TFBS_Trl|FBsf0000340293)
7	6	3L_18989490_SNP	FBgn0036837	CG18135	INTRON	0	C	T	T	0.1026	4	35	1.138	1.36212e-06	(TF_binding_site|BDTNP1_TFBS_dl|FBsf0000308500);(TF_binding_site|mE1_TFBS_Trl|FBsf0000340293)
7	6	3L_18989618_SNP	FBgn0036837	CG18135	INTRON	0	C	A	A	0.1026	4	35	1.138	1.36212e-06	(TF_binding_site|BDTNP1_TFBS_dl|FBsf0000308500);(TF_binding_site|mE1_TFBS_Trl|FBsf0000340293)
7	6	3L_18990935_SNP	FBgn0036837	CG18135	INTRON	0	G	A	A	0.1282	5	34	1.006	1.97381e-06	-
7	6	3L_18990935_SNP	FBgn0036838	CG3808	DOWNSTREAM	40	G	A	A	0.1282	5	34	1.006	1.97381e-06	-
7	6	3L_2174562_SNP	FBgn0035312	CG15820	UPSTREAM	230	A	T	T	0.1143	4	31	1.205	1.76208e-07	-
7	6	3L_7987692_SNP	FBgn0011817	nmo	INTRON	0	T	A	A	0.2	7	28	0.8875	1.97168e-06	-
7	6	3R_10630431_SNP	FBgn0266756	btsz	UTR_3_PRIME	0	C	T	T	0.1	4	36	1.137	1.1421e-06	-
7	6	3R_10630431_SNP	FBgn0038262	CG14857	DOWNSTREAM	367	C	T	T	0.1	4	36	1.137	1.1421e-06	-
7	6	3R_10630593_SNP	FBgn0266756	btsz	UTR_3_PRIME	0	T	A	A	0.1579	6	32	0.9751	4.39823e-07	-
7	6	3R_10630593_SNP	FBgn0038262	CG14857	DOWNSTREAM	529	T	A	A	0.1579	6	32	0.9751	4.39823e-07	-
7	6	3R_14041134_SNP	FBgn0028499	CG7985	DOWNSTREAM	411	C	T	T	0.125	5	35	1.007	4.85726e-07	-
7	6	3R_14041134_SNP	FBgn0038581	CG14314	UPSTREAM	730	C	T	T	0.125	5	35	1.007	4.85726e-07	-
7	6	3R_14041176_SNP	FBgn0028499	CG7985	DOWNSTREAM	453	A	T	T	0.125	5	35	1.007	4.85726e-07	-
7	6	3R_14041176_SNP	FBgn0038581	CG14314	UPSTREAM	688	A	T	T	0.125	5	35	1.007	4.85726e-07	-
7	6	3R_14041178_SNP	FBgn0028499	CG7985	DOWNSTREAM	455	G	A	A	0.125	5	35	1.007	4.85726e-07	-
7	6	3R_14041178_SNP	FBgn0038581	CG14314	UPSTREAM	686	G	A	A	0.125	5	35	1.007	4.85726e-07	-
7	6	3R_14041420_SNP	FBgn0038581	CG14314	UPSTREAM	444	T	C	C	0.125	5	35	1.007	4.85726e-07	-
7	6	3R_14041420_SNP	FBgn0028499	CG7985	DOWNSTREAM	697	T	C	C	0.125	5	35	1.007	4.85726e-07	-
7	6	3R_14041423_SNP	FBgn0038581	CG14314	UPSTREAM	441	T	G	G	0.1429	5	30	1.022	3.64818e-07	-
7	6	3R_14041423_SNP	FBgn0028499	CG7985	DOWNSTREAM	700	T	G	G	0.1429	5	30	1.022	3.64818e-07	-
7	6	3R_14041425_SNP	FBgn0038581	CG14314	UPSTREAM	439	C	G	G	0.125	5	35	1.007	4.85726e-07	-
7	6	3R_14041425_SNP	FBgn0028499	CG7985	DOWNSTREAM	702	C	G	G	0.125	5	35	1.007	4.85726e-07	-
7	6	3R_14041427_SNP	FBgn0038581	CG14314	UPSTREAM	437	C	T	T	0.1429	5	30	1.022	3.64818e-07	-
7	6	3R_14041427_SNP	FBgn0028499	CG7985	DOWNSTREAM	704	C	T	T	0.1429	5	30	1.022	3.64818e-07	-
7	6	3R_14041513_SNP	FBgn0038581	CG14314	UPSTREAM	351	T	C	C	0.125	5	35	1.007	4.85726e-07	(TF_binding_site|BDTNP1_TFBS_twi|FBsf0000265387)
7	6	3R_14041513_SNP	FBgn0028499	CG7985	DOWNSTREAM	790	T	C	C	0.125	5	35	1.007	4.85726e-07	(TF_binding_site|BDTNP1_TFBS_twi|FBsf0000265387)
7	6	3R_14041514_SNP	FBgn0038581	CG14314	UPSTREAM	350	T	G	G	0.1282	5	34	1.002	6.0468e-07	(TF_binding_site|BDTNP1_TFBS_twi|FBsf0000265387)
7	6	3R_14041514_SNP	FBgn0028499	CG7985	DOWNSTREAM	791	T	G	G	0.1282	5	34	1.002	6.0468e-07	(TF_binding_site|BDTNP1_TFBS_twi|FBsf0000265387)
7	6	3R_19629624_SNP	FBgn0053111	CG33111	INTRON	0	T	G	G	0.1	4	36	1.194	1.69033e-07	-
7	6	3R_19629624_SNP	FBgn0085384	CG34355	UTR_5_PRIME	0	T	G	G	0.1	4	36	1.194	1.69033e-07	-
7	6	3R_22169816_SNP	FBgn0053970	CG33970	INTRON	0	G	A	A	0.1026	4	35	1.145	9.119e-07	-
7	6	3R_22169816_SNP	FBgn0039421	CG6036	DOWNSTREAM	196	G	A	A	0.1026	4	35	1.145	9.119e-07	-
7	6	3R_22169865_SNP	FBgn0053970	CG33970	INTRON	0	T	C	C	0.15	6	34	0.9945	1.66312e-07	-
7	6	3R_22169865_SNP	FBgn0039421	CG6036	DOWNSTREAM	147	T	C	C	0.15	6	34	0.9945	1.66312e-07	-
7	6	3R_22169866_SNP	FBgn0053970	CG33970	INTRON	0	A	G	G	0.15	6	34	0.9945	1.66312e-07	-
7	6	3R_22169866_SNP	FBgn0039421	CG6036	DOWNSTREAM	146	A	G	G	0.15	6	34	0.9945	1.66312e-07	-
7	6	3R_22187857_SNP	FBgn0053970	CG33970	DOWNSTREAM	149	A	C	C	0.1026	4	35	1.145	9.119e-07	-
7	6	3R_26893829_SNP	FBgn0024288	Sox100B	INTRON	0	C	T	T	0.1795	7	32	0.9032	1.03865e-06	-
7	6	3R_26893839_SNP	FBgn0024288	Sox100B	INTRON	0	A	C	C	0.1795	7	32	0.9032	1.03865e-06	-
7	6	3R_6281824_SNP	Intergenic	Intergenic			G	A	A	0.1538	6	33	0.9356	1.73955e-06	-
7	6	X_10815740_SNP	FBgn0264502	CG43901	DOWNSTREAM	410	G	A	A	0.1282	5	34	1.03	1.22142e-06	(TF_binding_site|BDTNP1_TFBS_dl|FBsf0000318272)
7	6	X_12241661_SNP	Intergenic	Intergenic			C	T	C	0.1892	7	30	0.8342	2.11095e-06	-
7	6	X_13034892_SNP	FBgn0052645	CG32645	INTRON	0	A	C	C	0.1026	4	35	1.11	1.8746e-06	(TF_binding_site|mE1_TFBS_HSA|FBsf0000382032)
7	6	X_13035161_INS	FBgn0052645	CG32645	INTRON	0	GTCTGTTTTTCGGTTTTTCG	G	G	0.1795	7	32	0.8823	1.57152e-06	-
7	6	X_13035336_SNP	FBgn0052645	CG32645	INTRON	0	A	G	G	0.125	5	35	1.027	9.1165e-07	-
7	6	X_19081023_INS	FBgn0030992	CG33253	UTR_3_PRIME	0	GCTTTAAAGCCATCGAACCAATG	G	G	0.1	4	36	1.137	1.1421e-06	(TF_binding_site|BDTNP1_TFBS_dl|FBsf0000320278);(TF_binding_site|mE1_TFBS_cad|FBsf0000243682);(TF_binding_site|mE1_TFBS_HSA|FBsf0000349475)
7	6	X_19610473_SNP	Intergenic	Intergenic			T	C	C	0.25	10	30	0.8211	2.55118e-07	(TF_binding_site|BDTNP1_TFBS_da|FBsf0000333145);(TF_binding_site|BDTNP1_TFBS_dl|FBsf0000320435);(TF_binding_site|mE1_TFBS_HSA|FBsf0000349705)
7	6	X_2552466_SNP	FBgn0003371	sgg	INTRON	0	T	G	T	0.2	8	32	0.8844	3.06763e-07	(TF_binding_site|BDTNP1_TFBS_dl|FBsf0000316148);(TF_binding_site|BDTNP1_TFBS_twi|FBsf0000204927);(TF_binding_site|mE1_TFBS_HSA|FBsf0000378638);(TF_binding_site|mE1_TFBS_Trl|FBsf0000342226)
7	7	2L_8118044_SNP	FBgn0031985	mon2	NON_SYNONYMOUS_CODING	0	C	G	G	0.3846	15	24	-0.6091	6.20765e-07	(TF_binding_site|mE1_TFBS_sens|FBsf0000216736)
7	7	2R_13140671_SNP	FBgn0265487	mbl	INTRON	0	C	A	A	0.275	11	29	0.6293	9.00385e-07	(TF_binding_site|BDTNP1_TFBS_twi|FBsf0000199627)
7	7	2R_13140671_SNP	FBgn0263708	CR43660	DOWNSTREAM	613	C	A	A	0.275	11	29	0.6293	9.00385e-07	(TF_binding_site|BDTNP1_TFBS_twi|FBsf0000199627)
7	7	2R_15071381_DEL	FBgn0263395	hppy	INTRON	0	CCAGC	G	CCAGC	0.4	16	24	-0.6033	2.84089e-07	-
7	7	2R_15071401_DEL	FBgn0263395	hppy	INTRON	0	CGC	C	CGC	0.4	16	24	-0.6033	2.84089e-07	-
7	7	3R_18019934_SNP	FBgn0051163	SKIP	INTRON	0	T	C	C	0.3056	11	25	-0.6498	1.81729e-06	(TF_binding_site|mE1_TFBS_cad|FBsf0000248992)
7	7	3R_18019934_SNP	FBgn0266751	CR45224	DOWNSTREAM	767	T	C	C	0.3056	11	25	-0.6498	1.81729e-06	(TF_binding_site|mE1_TFBS_cad|FBsf0000248992)
7	7	X_1649460_SNP	Intergenic	Intergenic			G	T	T	0.375	15	25	-0.6074	5.37868e-07	-
7	7	X_1650148_SNP	Intergenic	Intergenic			G	C	C	0.425	17	23	-0.5889	7.75393e-07	(TF_binding_site|mE1_TFBS_chinmo|FBsf0000208095)
7	8	2L_18228842_SNP	FBgn0261804	CG42750	INTRON	0	A	G	A	0.2973	11	26	0.6373	1.62661e-06	-
7	8	2L_18228863_SNP	FBgn0261804	CG42750	INTRON	0	T	C	T	0.2973	11	26	0.6459	1.03273e-06	-
7	8	2L_18228870_SNP	FBgn0261804	CG42750	INTRON	0	T	A	T	0.2895	11	27	0.6345	1.56382e-06	-
7	8	2L_18228886_SNP	FBgn0261804	CG42750	INTRON	0	C	T	C	0.2895	11	27	0.6345	1.56382e-06	-
8	1	2R_1351345_SNP	Intergenic	Intergenic			T	C	C	0.1053	4	34	2.046	8.79553e-07	-
8	1	2R_17962128_SNP	FBgn0034689	CG2921	SYNONYMOUS_CODING	0	A	G	G	0.1026	4	35	1.999	1.86099e-06	(TF_binding_site|mE1_TFBS_cad|FBsf0000247229);(TF_binding_site|mE1_TFBS_HSA|FBsf0000359266);(TF_binding_site|mE1_TFBS_inv|FBsf0000236839);(TF_binding_site|mE1_TFBS_sens|FBsf0000229330)
8	1	2R_17963341_DEL	FBgn0067102	GlcT-1	UPSTREAM	151	A	AG	AG	0.1026	4	35	1.999	1.86099e-06	(TF_binding_site|BDTNP1_TFBS_da|FBsf0000325089);(TF_binding_site|BDTNP1_TFBS_dl|FBsf0000303824);(TF_binding_site|BDTNP1_TFBS_Med|FBsf0000281220);(TF_binding_site|BDTNP1_TFBS_twi|FBsf0000200107);(TF_binding_site|mE1_TFBS_cad|FBsf0000247230)
8	1	2R_17963341_DEL	FBgn0034689	CG2921	UPSTREAM	529	A	AG	AG	0.1026	4	35	1.999	1.86099e-06	(TF_binding_site|BDTNP1_TFBS_da|FBsf0000325089);(TF_binding_site|BDTNP1_TFBS_dl|FBsf0000303824);(TF_binding_site|BDTNP1_TFBS_Med|FBsf0000281220);(TF_binding_site|BDTNP1_TFBS_twi|FBsf0000200107);(TF_binding_site|mE1_TFBS_cad|FBsf0000247230)
8	1	2R_19262577_SNP	FBgn0034854	Golgin245	SYNONYMOUS_CODING	0	A	G	G	0.1	4	36	2.046	7.97135e-07	(TF_binding_site|mE1_TFBS_cad|FBsf0000247339)
8	1	2R_19262589_SNP	FBgn0034854	Golgin245	SYNONYMOUS_CODING	0	T	C	C	0.1026	4	35	2.06	6.55077e-07	(TF_binding_site|mE1_TFBS_cad|FBsf0000247339)
8	1	3L_11882891_SNP	FBgn0266100	CG44837	INTRON	0	A	G	G	0.1	4	36	2.08	4.37284e-07	-
8	1	3L_11882891_SNP	FBgn0036220	CG5897	UPSTREAM	810	A	G	G	0.1	4	36	2.08	4.37284e-07	-
8	1	3L_11882892_SNP	FBgn0266100	CG44837	INTRON	0	A	G	G	0.1	4	36	2.08	4.37284e-07	-
8	1	3L_11882892_SNP	FBgn0036220	CG5897	UPSTREAM	811	A	G	G	0.1	4	36	2.08	4.37284e-07	-
8	1	3L_18961249_SNP	Intergenic	Intergenic			G	T	G	0.1026	4	35	1.995	1.95294e-06	-
8	1	3L_2433487_INS	FBgn0266696	CG45186	INTRON	0	AC	A	A	0.1282	5	34	1.816	1.78909e-06	(TF_binding_site|BDTNP1_TFBS_da|FBsf0000325831);(TF_binding_site|BDTNP1_TFBS_dl|FBsf0000305172);(TF_binding_site|BDTNP1_TFBS_prd|FBsf0000275342);(TF_binding_site|BDTNP1_TFBS_twi|FBsf0000202759);(TF_binding_site|mE1_TFBS_HSA|FBsf0000361483)
8	1	3L_7656042_SNP	FBgn0052373	CG32373	INTRON	0	G	A	A	0.1	4	36	2.08	4.37284e-07	-
8	1	3L_7656042_SNP	FBgn0261788	Ank2	INTRON	0	G	A	A	0.1	4	36	2.08	4.37284e-07	-
8	1	3L_7656042_SNP	FBgn0265084	CG44195	INTRON	0	G	A	A	0.1	4	36	2.08	4.37284e-07	-
8	1	3R_10018875_SNP	FBgn0011582	Dop1R1	INTRON	0	A	G	G	0.1	4	36	2	1.73767e-06	-
8	1	3R_9557527_SNP	FBgn0085412	CG34383	INTRON	0	T	A	A	0.1026	4	35	1.994	1.9953e-06	(TF_binding_site|BDTNP1_TFBS_dl|FBsf0000311496);(TF_binding_site|BDTNP1_TFBS_twi|FBsf0000264896);(TF_binding_site|mE1_TFBS_HSA|FBsf0000371294)
8	1	X_13873859_SNP	FBgn0267033	mamo	INTRON	0	T	G	G	0.1	4	36	1.98	1.0905e-06	-
8	3	2L_16233606_SNP	FBgn0261999	CG42817	INTRON	0	T	C	C	0.4324	16	21	-0.5383	8.47029e-08	-
8	3	2R_14562809_SNP	Intergenic	Intergenic			A	G	G	0.25	10	30	-0.5523	1.19467e-06	(TF_binding_site|BDTNP1_TFBS_bcd|FBsf0000333471);(TF_binding_site|BDTNP1_TFBS_da|FBsf0000324701);(TF_binding_site|BDTNP1_TFBS_dl|FBsf0000303112);(TF_binding_site|BDTNP1_TFBS_gt|FBsf0000293575);(TF_binding_site|BDTNP1_TFBS_hb|FBsf0000290280);(TF_binding_site|BDTNP1_TFBS_Med|FBsf0000280852);(TF_binding_site|BDTNP1_TFBS_twi|FBsf0000199779)
8	3	2R_14562817_INS	Intergenic	Intergenic			TT	T	T	0.2821	11	28	-0.5558	3.73291e-07	(TF_binding_site|BDTNP1_TFBS_bcd|FBsf0000333471);(TF_binding_site|BDTNP1_TFBS_da|FBsf0000324701);(TF_binding_site|BDTNP1_TFBS_dl|FBsf0000303112);(TF_binding_site|BDTNP1_TFBS_gt|FBsf0000293575);(TF_binding_site|BDTNP1_TFBS_hb|FBsf0000290280);(TF_binding_site|BDTNP1_TFBS_Med|FBsf0000280852);(TF_binding_site|BDTNP1_TFBS_twi|FBsf0000199779)
8	3	2R_2343846_INS	Intergenic	Intergenic			TAGCGCCGCGTCTTCG	T	T	0.1538	6	33	-0.6639	1.73858e-06	(transposable_element|FlyBase|FBti0019967)
8	3	2R_2374266_SNP	Intergenic	Intergenic			C	G	G	0.1842	7	31	-0.626	1.74291e-06	-
8	3	2R_6618654_SNP	FBgn0033543	CG12338	INTRON	0	T	C	C	0.1579	6	32	-0.666	1.68714e-06	(TF_binding_site|BDTNP1_TFBS_dl|FBsf0000301214);(TF_binding_site|mE1_TFBS_HSA|FBsf0000355384);(TF_binding_site|mE1_TFBS_HSA|FBsf0000355385);(TF_binding_site|mE1_TFBS_Ubx|FBsf0000263015)
8	3	2R_6618654_SNP	FBgn0033544	CG7220	UPSTREAM	186	T	C	C	0.1579	6	32	-0.666	1.68714e-06	(TF_binding_site|BDTNP1_TFBS_dl|FBsf0000301214);(TF_binding_site|mE1_TFBS_HSA|FBsf0000355384);(TF_binding_site|mE1_TFBS_HSA|FBsf0000355385);(TF_binding_site|mE1_TFBS_Ubx|FBsf0000263015)
8	3	2R_6618695_SNP	FBgn0033543	CG12338	INTRON	0	C	A	A	0.1538	6	33	-0.6627	1.83805e-06	(TF_binding_site|BDTNP1_TFBS_dl|FBsf0000301214);(TF_binding_site|mE1_TFBS_HSA|FBsf0000355384);(TF_binding_site|mE1_TFBS_HSA|FBsf0000355385);(TF_binding_site|mE1_TFBS_Ubx|FBsf0000263015)
8	3	2R_6618695_SNP	FBgn0033544	CG7220	UPSTREAM	145	C	A	A	0.1538	6	33	-0.6627	1.83805e-06	(TF_binding_site|BDTNP1_TFBS_dl|FBsf0000301214);(TF_binding_site|mE1_TFBS_HSA|FBsf0000355384);(TF_binding_site|mE1_TFBS_HSA|FBsf0000355385);(TF_binding_site|mE1_TFBS_Ubx|FBsf0000263015)
8	3	3L_11845916_SNP	FBgn0266100	CG44837	INTRON	0	G	A	A	0.3611	13	23	-0.5224	1.39634e-06	-
8	3	3L_11845927_SNP	FBgn0266100	CG44837	INTRON	0	A	T	T	0.3333	12	24	-0.5344	1.21716e-06	-
8	3	3L_11845958_SNP	FBgn0266100	CG44837	INTRON	0	A	T	T	0.2424	8	25	-0.6114	1.85334e-06	-
8	3	3L_4418733_SNP	FBgn0035542	DOR	INTRON	0	G	A	A	0.2	8	32	-0.6058	7.56653e-07	(TF_binding_site|mE1_TFBS_chinmo|FBsf0000209756)
8	3	3R_13754357_SNP	FBgn0263995	cpo	INTRON	0	C	G	C	0.2857	10	25	-0.5655	1.23318e-06	(TF_binding_site|mE1_TFBS_HSA|FBsf0000372729);(TF_binding_site|mE1_TFBS_inv|FBsf0000237321)
8	3	3R_25130630_SNP	Intergenic	Intergenic			G	A	A	0.2564	10	29	-0.55	1.59546e-06	(TF_binding_site|BDTNP1_TFBS_da|FBsf0000330779);(TF_binding_site|BDTNP1_TFBS_dl|FBsf0000314565);(TF_binding_site|BDTNP1_TFBS_Med|FBsf0000286849);(TF_binding_site|BDTNP1_TFBS_sna|FBsf0000271473);(TF_binding_site|BDTNP1_TFBS_twi|FBsf0000266330);(TF_binding_site|mE1_TFBS_cad|FBsf0000249499);(TF_binding_site|mE1_TFBS_HSA|FBsf0000376291);(TF_binding_site|mE1_TFBS_sens|FBsf0000234039)
8	3	3R_25130657_SNP	Intergenic	Intergenic			A	T	T	0.2105	8	30	-0.6371	1.37772e-07	(TF_binding_site|BDTNP1_TFBS_da|FBsf0000330779);(TF_binding_site|BDTNP1_TFBS_dl|FBsf0000314565);(TF_binding_site|BDTNP1_TFBS_Med|FBsf0000286849);(TF_binding_site|BDTNP1_TFBS_sna|FBsf0000271473);(TF_binding_site|BDTNP1_TFBS_twi|FBsf0000266330);(TF_binding_site|mE1_TFBS_cad|FBsf0000249499);(TF_binding_site|mE1_TFBS_HSA|FBsf0000376291);(TF_binding_site|mE1_TFBS_sens|FBsf0000234039)
8	3	3R_26252030_SNP	FBgn0039767	CG2218	SYNONYMOUS_CODING	0	T	C	T	0.2368	9	29	-0.6398	1.55357e-08	(TF_binding_site|BDTNP1_TFBS_ftz|FBsf0000295544);(TF_binding_site|BDTNP1_TFBS_sna|FBsf0000271521);(TF_binding_site|BDTNP1_TFBS_twi|FBsf0000266448);(TF_binding_site|mE1_TFBS_cad|FBsf0000249584);(TF_binding_site|mE1_TFBS_chinmo|FBsf0000213784);(TF_binding_site|mE1_TFBS_HSA|FBsf0000376693);(TF_binding_site|mE1_TFBS_HSA|FBsf0000376694)
9	2	3L_835513_DEL	FBgn0260755	CG42553	UTR_3_PRIME	0	TT	T	TT	0.4865	18	19	0.7415	1.46448e-06	(TF_binding_site|BDTNP1_TFBS_dl|FBsf0000304876)
9	2	3L_835513_DEL	FBgn0260756	CG42554	UPSTREAM	169	TT	T	TT	0.4865	18	19	0.7415	1.46448e-06	(TF_binding_site|BDTNP1_TFBS_dl|FBsf0000304876)
9	3	2R_17021575_SNP	FBgn0034590	Magi	INTRON	0	T	A	A	0.1842	7	31	0.6787	1.99947e-06	(TF_binding_site|BDTNP1_TFBS_da|FBsf0000324981);(TF_binding_site|BDTNP1_TFBS_dl|FBsf0000303616);(TF_binding_site|BDTNP1_TFBS_twi|FBsf0000200010)
9	4	2L_10526280_INS	Intergenic	Intergenic			TT	T	T	0.2368	9	29	0.5958	3.93996e-07	(TF_binding_site|mE1_TFBS_HSA|FBsf0000347436)
10	1	2L_6625554_SNP	FBgn0051634	Oatp26F	INTRON	0	C	T	T	0.2821	11	28	1.518	1.95922e-07	-
10	1	2L_6625554_SNP	FBgn0085374	CG34345	DOWNSTREAM	195	C	T	T	0.2821	11	28	1.518	1.95922e-07	-
10	1	2L_6625561_SNP	FBgn0051634	Oatp26F	INTRON	0	G	T	T	0.2821	11	28	1.518	1.95922e-07	-
10	1	2L_6625561_SNP	FBgn0085374	CG34345	DOWNSTREAM	202	G	T	T	0.2821	11	28	1.518	1.95922e-07	-
10	1	2R_14191329_SNP	FBgn0034327	CG14505	SYNONYMOUS_CODING	0	A	C	A	0.3846	15	24	1.337	1.6816e-06	(TF_binding_site|BDTNP1_TFBS_bcd|FBsf0000333470);(TF_binding_site|BDTNP1_TFBS_dl|FBsf0000303007);(TF_binding_site|BDTNP1_TFBS_twi|FBsf0000199731);(TF_binding_site|mE1_TFBS_cad|FBsf0000246943);(TF_binding_site|mE1_TFBS_HSA|FBsf0000358047);(TF_binding_site|mE1_TFBS_Kr|FBsf0000253423)
10	1	2R_14191329_SNP	FBgn0010575	sbb	INTRON	0	A	C	A	0.3846	15	24	1.337	1.6816e-06	(TF_binding_site|BDTNP1_TFBS_bcd|FBsf0000333470);(TF_binding_site|BDTNP1_TFBS_dl|FBsf0000303007);(TF_binding_site|BDTNP1_TFBS_twi|FBsf0000199731);(TF_binding_site|mE1_TFBS_cad|FBsf0000246943);(TF_binding_site|mE1_TFBS_HSA|FBsf0000358047);(TF_binding_site|mE1_TFBS_Kr|FBsf0000253423)
10	1	2R_14191395_SNP	FBgn0010575	sbb	INTRON	0	A	C	A	0.3846	15	24	1.337	1.6816e-06	(TF_binding_site|BDTNP1_TFBS_bcd|FBsf0000333470);(TF_binding_site|BDTNP1_TFBS_dl|FBsf0000303007);(TF_binding_site|BDTNP1_TFBS_Med|FBsf0000280806);(TF_binding_site|BDTNP1_TFBS_twi|FBsf0000199731);(TF_binding_site|mE1_TFBS_cad|FBsf0000246943);(TF_binding_site|mE1_TFBS_HSA|FBsf0000358047);(TF_binding_site|mE1_TFBS_Kr|FBsf0000253423)
10	1	2R_14191395_SNP	FBgn0034327	CG14505	SYNONYMOUS_CODING	0	A	C	A	0.3846	15	24	1.337	1.6816e-06	(TF_binding_site|BDTNP1_TFBS_bcd|FBsf0000333470);(TF_binding_site|BDTNP1_TFBS_dl|FBsf0000303007);(TF_binding_site|BDTNP1_TFBS_Med|FBsf0000280806);(TF_binding_site|BDTNP1_TFBS_twi|FBsf0000199731);(TF_binding_site|mE1_TFBS_cad|FBsf0000246943);(TF_binding_site|mE1_TFBS_HSA|FBsf0000358047);(TF_binding_site|mE1_TFBS_Kr|FBsf0000253423)
10	3	2R_9231893_SNP	FBgn0265104	CR44206	INTRON	0	T	A	A	0.325	13	27	-0.5921	1.55086e-06	-
10	4	2L_10479871_SNP	FBgn0032256	RluA-2	INTRON	0	T	A	A	0.1081	4	33	0.7346	1.64132e-06	(TF_binding_site|BDTNP1_TFBS_dl|FBsf0000297958)
10	4	2L_18923964_DEL	FBgn0032723	ssp3	INTRON	0	AAA	C	AAA	0.2	8	32	0.5651	1.23738e-06	(TF_binding_site|BDTNP1_TFBS_da|FBsf0000322853);(TF_binding_site|BDTNP1_TFBS_dl|FBsf0000299294);(TF_binding_site|BDTNP1_TFBS_slp1|FBsf0000271909);(TF_binding_site|BDTNP1_TFBS_twi|FBsf0000202084);(TF_binding_site|mE1_TFBS_HSA|FBsf0000352302);(TF_binding_site|mE1_TFBS_inv|FBsf0000235059);(TF_binding_site|mE1_TFBS_sens|FBsf0000218187)
10	4	2R_8188023_SNP	FBgn0033708	CG8850	SYNONYMOUS_CODING	0	T	C	T	0.1538	6	33	0.6529	4.29732e-07	(TF_binding_site|mE1_TFBS_cad|FBsf0000246436);(TF_binding_site|mE1_TFBS_HSA|FBsf0000355934);(TF_binding_site|mE1_TFBS_sens|FBsf0000227543)
10	4	2R_8188023_SNP	FBgn0261611	CG42700	UTR_3_PRIME	0	T	C	T	0.1538	6	33	0.6529	4.29732e-07	(TF_binding_site|mE1_TFBS_cad|FBsf0000246436);(TF_binding_site|mE1_TFBS_HSA|FBsf0000355934);(TF_binding_site|mE1_TFBS_sens|FBsf0000227543)
10	4	3L_11142596_MNP	FBgn0052082	CG32082	INTRON	0	GCC	AAA	AAA	0.2778	10	26	0.5213	2.14558e-06	-
10	4	3L_11142596_MNP	FBgn0036139	CG6216	DOWNSTREAM	82	GCC	AAA	AAA	0.2778	10	26	0.5213	2.14558e-06	-
10	4	3L_4398415_SNP	FBgn0035539	slow	INTRON	0	A	C	C	0.35	14	26	0.4788	7.71659e-07	-
10	4	3L_5225086_SNP	FBgn0052423	shep	INTRON	0	G	T	T	0.1	4	36	0.7452	1.30536e-06	-
10	4	3L_9333090_SNP	FBgn0035976	PGRP-LC	INTRON	0	G	T	T	0.1282	5	34	0.6681	1.69127e-06	(TF_binding_site|mE1_TFBS_Trl|FBsf0000339711)
10	4	3L_9769940_SNP	FBgn0036043	CG8177	INTRON	0	T	C	T	0.1	4	36	0.7414	1.82235e-06	-
10	4	3L_9796054_SNP	FBgn0044328	CG32052	INTRON	0	G	A	A	0.1	4	36	0.7414	1.82235e-06	(TF_binding_site|BDTNP1_TFBS_dl|FBsf0000306565);(TF_binding_site|BDTNP1_TFBS_hb|FBsf0000291294);(TF_binding_site|BDTNP1_TFBS_Med|FBsf0000282645);(TF_binding_site|BDTNP1_TFBS_twi|FBsf0000203352);(TF_binding_site|mE1_TFBS_HSA|FBsf0000363761)
10	4	3L_9796054_SNP	FBgn0044049	Ilp4	DOWNSTREAM	445	G	A	A	0.1	4	36	0.7414	1.82235e-06	(TF_binding_site|BDTNP1_TFBS_dl|FBsf0000306565);(TF_binding_site|BDTNP1_TFBS_hb|FBsf0000291294);(TF_binding_site|BDTNP1_TFBS_Med|FBsf0000282645);(TF_binding_site|BDTNP1_TFBS_twi|FBsf0000203352);(TF_binding_site|mE1_TFBS_HSA|FBsf0000363761)
10	4	3L_9796054_SNP	FBgn0044050	Ilp3	UPSTREAM	834	G	A	A	0.1	4	36	0.7414	1.82235e-06	(TF_binding_site|BDTNP1_TFBS_dl|FBsf0000306565);(TF_binding_site|BDTNP1_TFBS_hb|FBsf0000291294);(TF_binding_site|BDTNP1_TFBS_Med|FBsf0000282645);(TF_binding_site|BDTNP1_TFBS_twi|FBsf0000203352);(TF_binding_site|mE1_TFBS_HSA|FBsf0000363761)
10	4	X_12222426_SNP	FBgn0267001	Ten-a	SYNONYMOUS_CODING	0	A	G	G	0.1053	4	34	0.7565	1.04489e-06	(TF_binding_site|mE1_TFBS_chinmo|FBsf0000208807);(TF_binding_site|mE1_TFBS_sens|FBsf0000220702)
10	4	X_6409844_SNP	FBgn0259242	CG42340	INTRON	0	T	C	C	0.1026	4	35	0.7341	1.58152e-06	-
10	4	X_6409850_SNP	FBgn0259242	CG42340	INTRON	0	T	C	C	0.1026	4	35	0.7341	1.58152e-06	-
11	1	3L_11249736_INS	FBgn0041094	scyl	DOWNSTREAM	465	C	CAAC	C	0.2121	7	26	1.559	2.99642e-07	(TF_binding_site|BDTNP1_TFBS_dl|FBsf0000306841);(TF_binding_site|mE1_TFBS_HSA|FBsf0000364167)
11	3	2R_11766974_SNP	FBgn0264089	sli	SYNONYMOUS_CODING	0	G	A	A	0.1026	4	35	0.9823	6.50148e-07	-
11	3	2R_3074491_SNP	FBgn0003090	pk	INTRON	0	T	C	C	0.1	4	36	0.9694	9.89312e-07	(TF_binding_site|BDTNP1_TFBS_da|FBsf0000323346);(TF_binding_site|BDTNP1_TFBS_dl|FBsf0000300373);(TF_binding_site|BDTNP1_TFBS_Med|FBsf0000279413);(TF_binding_site|BDTNP1_TFBS_sna|FBsf0000267453);(TF_binding_site|BDTNP1_TFBS_twi|FBsf0000198629);(TF_binding_site|mE1_TFBS_bab1|FBsf0000214164);(TF_binding_site|mE1_TFBS_hkb|FBsf0000255198);(TF_binding_site|mE1_TFBS_HSA|FBsf0000354058);(TF_binding_site|…
11	3	2R_4219059_SNP	FBgn0261588	pdm3	INTRON	0	T	C	C	0.1	4	36	0.9694	9.89312e-07	-
11	3	2R_8878567_SNP	Intergenic	Intergenic			T	C	C	0.1282	5	34	0.9076	3.29894e-07	(TF_binding_site|BDTNP1_TFBS_dl|FBsf0000301781);(TF_binding_site|mE1_TFBS_cad|FBsf0000246512);(TF_binding_site|mE1_TFBS_Trl|FBsf0000338492)
11	3	2R_8878846_SNP	Intergenic	Intergenic			A	T	T	0.125	5	35	0.9016	3.97305e-07	(TF_binding_site|BDTNP1_TFBS_dl|FBsf0000301781);(TF_binding_site|BDTNP1_TFBS_Med|FBsf0000280153);(TF_binding_site|BDTNP1_TFBS_prd|FBsf0000274388);(TF_binding_site|BDTNP1_TFBS_twi|FBsf0000199227);(TF_binding_site|mE1_TFBS_cad|FBsf0000246512)
11	3	2R_8878883_INS	Intergenic	Intergenic			CCAACC	T	T	0.125	5	35	0.9016	3.97305e-07	(TF_binding_site|BDTNP1_TFBS_dl|FBsf0000301781);(TF_binding_site|BDTNP1_TFBS_Med|FBsf0000280153);(TF_binding_site|BDTNP1_TFBS_prd|FBsf0000274388);(TF_binding_site|BDTNP1_TFBS_twi|FBsf0000199227);(TF_binding_site|mE1_TFBS_cad|FBsf0000246512)
11	3	2R_8878888_SNP	Intergenic	Intergenic			T	G	G	0.125	5	35	0.9016	3.97305e-07	(TF_binding_site|BDTNP1_TFBS_dl|FBsf0000301781);(TF_binding_site|BDTNP1_TFBS_Med|FBsf0000280153);(TF_binding_site|BDTNP1_TFBS_prd|FBsf0000274388);(TF_binding_site|BDTNP1_TFBS_twi|FBsf0000199227);(TF_binding_site|mE1_TFBS_cad|FBsf0000246512)
11	3	2R_8878891_SNP	Intergenic	Intergenic			T	A	A	0.125	5	35	0.9016	3.97305e-07	(TF_binding_site|BDTNP1_TFBS_dl|FBsf0000301781);(TF_binding_site|BDTNP1_TFBS_Med|FBsf0000280153);(TF_binding_site|BDTNP1_TFBS_prd|FBsf0000274388);(TF_binding_site|BDTNP1_TFBS_twi|FBsf0000199227);(TF_binding_site|mE1_TFBS_cad|FBsf0000246512)
11	3	2R_8878896_SNP	Intergenic	Intergenic			C	A	A	0.125	5	35	0.9016	3.97305e-07	(TF_binding_site|BDTNP1_TFBS_dl|FBsf0000301781);(TF_binding_site|BDTNP1_TFBS_Med|FBsf0000280153);(TF_binding_site|BDTNP1_TFBS_prd|FBsf0000274388);(TF_binding_site|BDTNP1_TFBS_twi|FBsf0000199227);(TF_binding_site|mE1_TFBS_cad|FBsf0000246512)
11	3	2R_8878910_SNP	Intergenic	Intergenic			A	G	G	0.125	5	35	0.9016	3.97305e-07	(TF_binding_site|BDTNP1_TFBS_dl|FBsf0000301781);(TF_binding_site|BDTNP1_TFBS_Med|FBsf0000280153);(TF_binding_site|BDTNP1_TFBS_prd|FBsf0000274388);(TF_binding_site|BDTNP1_TFBS_twi|FBsf0000199227);(TF_binding_site|mE1_TFBS_cad|FBsf0000246512)
11	3	2R_8878920_SNP	Intergenic	Intergenic			C	T	T	0.125	5	35	0.9016	3.97305e-07	(TF_binding_site|BDTNP1_TFBS_dl|FBsf0000301781);(TF_binding_site|BDTNP1_TFBS_Med|FBsf0000280153);(TF_binding_site|BDTNP1_TFBS_prd|FBsf0000274388);(TF_binding_site|BDTNP1_TFBS_twi|FBsf0000199227);(TF_binding_site|mE1_TFBS_cad|FBsf0000246512)
11	3	2R_8878921_SNP	Intergenic	Intergenic			T	A	A	0.125	5	35	0.9016	3.97305e-07	(TF_binding_site|BDTNP1_TFBS_dl|FBsf0000301781);(TF_binding_site|BDTNP1_TFBS_Med|FBsf0000280153);(TF_binding_site|BDTNP1_TFBS_prd|FBsf0000274388);(TF_binding_site|BDTNP1_TFBS_twi|FBsf0000199227);(TF_binding_site|mE1_TFBS_cad|FBsf0000246512)
11	3	2R_8878933_SNP	Intergenic	Intergenic			A	G	A	0.1282	5	34	0.9047	3.73296e-07	(TF_binding_site|BDTNP1_TFBS_dl|FBsf0000301781);(TF_binding_site|BDTNP1_TFBS_Med|FBsf0000280153);(TF_binding_site|BDTNP1_TFBS_prd|FBsf0000274388);(TF_binding_site|BDTNP1_TFBS_twi|FBsf0000199227);(TF_binding_site|mE1_TFBS_cad|FBsf0000246512)
12	2	2L_3228491_SNP	Intergenic	Intergenic			G	A	A	0.3158	12	26	0.9136	1.37323e-06	-
12	4	3R_23931339_SNP	Intergenic	Intergenic			C	T	T	0.225	9	31	0.8677	2.13244e-06	-
12	4	3R_23931381_SNP	Intergenic	Intergenic			A	T	T	0.225	9	31	0.8677	2.13244e-06	-
12	4	3R_23931403_DEL	Intergenic	Intergenic			A	AATTCTGCAAA	AATTCTGCAAA	0.2051	8	31	0.9453	5.70214e-07	-
12	5	2L_1720431_SNP	FBgn0031359	Rim2	INTRON	0	G	A	A	0.3333	13	26	0.687	1.82544e-06	-
12	5	3L_11410919_SNP	Intergenic	Intergenic			G	T	G	0.2821	11	28	0.7251	1.31097e-06	(TF_binding_site|BDTNP1_TFBS_dl|FBsf0000306872);(TF_binding_site|BDTNP1_TFBS_twi|FBsf0000203480);(TF_binding_site|mE1_TFBS_HSA|FBsf0000364220)
12	5	3L_11410922_SNP	Intergenic	Intergenic			G	C	G	0.2821	11	28	0.7251	1.31097e-06	(TF_binding_site|BDTNP1_TFBS_dl|FBsf0000306872);(TF_binding_site|BDTNP1_TFBS_twi|FBsf0000203480);(TF_binding_site|mE1_TFBS_HSA|FBsf0000364220)
12	5	3R_22268340_SNP	FBgn0263118	tx	INTRON	0	T	G	G	0.1622	6	31	0.927	4.61267e-07	-
12	5	X_16805381_SNP	FBgn0265967	CR44754	INTRON	0	G	A	A	0.1538	6	33	0.8861	1.00451e-06	-
12	5	X_16805522_SNP	FBgn0265967	CR44754	INTRON	0	C	T	T	0.1538	6	33	0.8861	1.00451e-06	-
12	6	2L_14090759_SNP	FBgn0028875	nAChRalpha5	UTR_3_PRIME	0	G	T	G	0.2	8	32	-0.7827	6.50341e-07	-
12	6	2L_17237997_SNP	FBgn0032629	beat-IIIc	INTRON	0	T	C	T	0.2821	11	28	-0.6822	1.91877e-06	-
12	7	3L_15192178_INS	Intergenic	Intergenic			TAT	T	T	0.2432	9	28	0.674	1.70371e-06	(TF_binding_site|BDTNP1_TFBS_dl|FBsf0000307652);(TF_binding_site|mE1_TFBS_cad|FBsf0000245071)
12	8	2L_11409515_SNP	Intergenic	Intergenic			T	G	G	0.3684	14	24	-0.5378	7.93191e-07	(regulatory_region|REDfly_CRMs|FBsf0000435292);(regulatory_region|REDfly_CRMs|FBsf0000436606)
12	8	3L_1108288_SNP	Intergenic	Intergenic			A	C	A	0.2821	11	28	-0.5575	1.27479e-06	(TF_binding_site|BDTNP1_TFBS_da|FBsf0000325692);(TF_binding_site|BDTNP1_TFBS_dl|FBsf0000304925);(TF_binding_site|BDTNP1_TFBS_twi|FBsf0000202648)
12	8	3L_1108295_SNP	Intergenic	Intergenic			T	A	T	0.275	11	29	-0.551	1.66027e-06	(TF_binding_site|BDTNP1_TFBS_da|FBsf0000325692);(TF_binding_site|BDTNP1_TFBS_dl|FBsf0000304925);(TF_binding_site|BDTNP1_TFBS_twi|FBsf0000202648)
12	8	3L_1108296_SNP	Intergenic	Intergenic			A	G	A	0.275	11	29	-0.551	1.66027e-06	(TF_binding_site|BDTNP1_TFBS_da|FBsf0000325692);(TF_binding_site|BDTNP1_TFBS_dl|FBsf0000304925);(TF_binding_site|BDTNP1_TFBS_twi|FBsf0000202648)
12	8	3L_1108298_SNP	Intergenic	Intergenic			A	G	A	0.275	11	29	-0.551	1.66027e-06	(TF_binding_site|BDTNP1_TFBS_da|FBsf0000325692);(TF_binding_site|BDTNP1_TFBS_dl|FBsf0000304925);(TF_binding_site|BDTNP1_TFBS_twi|FBsf0000202648)
12	8	3L_1108349_SNP	Intergenic	Intergenic			G	A	G	0.275	11	29	-0.551	1.66027e-06	(TF_binding_site|BDTNP1_TFBS_da|FBsf0000325692);(TF_binding_site|BDTNP1_TFBS_dl|FBsf0000304925);(TF_binding_site|BDTNP1_TFBS_twi|FBsf0000202648);(TF_binding_site|mE1_TFBS_HSA|FBsf0000360985)
12	8	3L_1108394_SNP	Intergenic	Intergenic			C	A	C	0.275	11	29	-0.551	1.66027e-06	(TF_binding_site|BDTNP1_TFBS_da|FBsf0000325692);(TF_binding_site|BDTNP1_TFBS_dl|FBsf0000304925);(TF_binding_site|BDTNP1_TFBS_twi|FBsf0000202648);(TF_binding_site|mE1_TFBS_HSA|FBsf0000360985)
12	8	3L_4864765_DEL	FBgn0035581	CG17150	DOWNSTREAM	151	AGACAGACGTAAA	A	AGACAGACGTAAA	0.4103	16	23	-0.5125	1.36658e-06	(TF_binding_site|mE1_TFBS_inv|FBsf0000235760)
12	8	3R_10190997_SNP	FBgn0024321	NK7.1	INTRON	0	T	A	A	0.2051	8	31	0.6276	1.13973e-06	(TF_binding_site|mE1_TFBS_cnc|FBsf0000206640)
12	8	3R_8944551_SNP	FBgn0038118	timeout	INTRON	0	T	A	A	0.3143	11	24	0.5526	1.54433e-06	-
12	9	2L_6824652_SNP	FBgn0051632	sens-2	INTRON	0	G	A	A	0.2	8	32	0.5148	1.44947e-06	-
12	9	3L_3752191_SNP	FBgn0052264	CG32264	INTRON	0	C	A	A	0.1538	6	33	0.5658	8.8376e-07	-
12	9	3L_7436371_INS	FBgn0259935	CG42458	INTRON	0	AGA	A	A	0.1316	5	33	0.7203	1.67039e-06	-
13	1	2L_12889269_SNP	Intergenic	Intergenic			A	G	G	0.325	13	27	1.167	1.69603e-06	-
13	1	2L_12890387_SNP	Intergenic	Intergenic			G	A	A	0.35	14	26	1.153	1.2047e-06	-
13	1	2L_12890568_SNP	Intergenic	Intergenic			A	G	G	0.3158	12	26	1.247	5.66643e-07	-
13	1	2L_12890575_SNP	Intergenic	Intergenic			T	G	G	0.35	14	26	1.153	1.2047e-06	-
13	1	2L_12890589_DEL	Intergenic	Intergenic			C	CA	CA	0.35	14	26	1.153	1.2047e-06	-
13	1	2L_12890595_SNP	Intergenic	Intergenic			T	A	A	0.35	14	26	1.153	1.2047e-06	-
13	1	2L_12890618_SNP	Intergenic	Intergenic			A	G	G	0.35	14	26	1.153	1.2047e-06	-
13	1	2L_12891756_SNP	Intergenic	Intergenic			A	G	G	0.3333	13	26	1.204	6.34898e-07	(TF_binding_site|BDTNP1_TFBS_dl|FBsf0000298396);(TF_binding_site|mE1_TFBS_HSA|FBsf0000350663)
13	1	2L_13088331_SNP	Intergenic	Intergenic			C	G	G	0.35	14	26	-1.186	7.63381e-07	(TF_binding_site|mE1_TFBS_hkb|FBsf0000255099);(TF_binding_site|mE1_TFBS_HSA|FBsf0000350704)
13	1	2L_13088363_INS	Intergenic	Intergenic			GC	G	G	0.3158	12	26	-1.24	9.73667e-07	(TF_binding_site|mE1_TFBS_hkb|FBsf0000255099);(TF_binding_site|mE1_TFBS_HSA|FBsf0000350704)
13	1	2L_13569280_SNP	FBgn0259984	kuz	INTRON	0	G	T	T	0.1842	7	31	1.505	6.53241e-07	-
13	1	2L_3532110_INS	FBgn0031550	Che-13	INTRON	0	ACATACATA	A	A	0.1538	6	33	1.562	1.35042e-06	(TF_binding_site|BDTNP1_TFBS_da|FBsf0000321255);(TF_binding_site|BDTNP1_TFBS_dl|FBsf0000296414);(TF_binding_site|BDTNP1_TFBS_Med|FBsf0000277402);(TF_binding_site|BDTNP1_TFBS_slp1|FBsf0000271625);(TF_binding_site|BDTNP1_TFBS_twi|FBsf0000200714);(TF_binding_site|mE1_TFBS_cad|FBsf0000241257);(TF_binding_site|mE1_TFBS_sens|FBsf0000215831)
13	1	X_16985775_SNP	FBgn0030817	CG4991	UPSTREAM	112	G	A	A	0.2105	8	30	1.447	4.16545e-07	(TF_binding_site|BDTNP1_TFBS_dl|FBsf0000319710);(TF_binding_site|mE1_TFBS_HSA|FBsf0000348750);(TF_binding_site|mE1_TFBS_Trl|FBsf0000343106)
13	1	X_16985775_SNP	FBgn0030816	CG16700	UPSTREAM	112	G	A	A	0.2105	8	30	1.447	4.16545e-07	(TF_binding_site|BDTNP1_TFBS_dl|FBsf0000319710);(TF_binding_site|mE1_TFBS_HSA|FBsf0000348750);(TF_binding_site|mE1_TFBS_Trl|FBsf0000343106)
13	2	2L_11931953_SNP	Intergenic	Intergenic			T	C	C	0.2632	10	28	-0.7534	1.24229e-06	-
13	2	3L_285821_SNP	FBgn0264707	RhoGEF3	INTRON	0	T	C	C	0.425	17	23	-0.6662	6.47767e-07	-
13	2	3L_295659_SNP	FBgn0264707	RhoGEF3	INTRON	0	T	C	C	0.2564	10	29	-0.7579	9.30267e-07	(TF_binding_site|BDTNP1_TFBS_da|FBsf0000325527);(TF_binding_site|BDTNP1_TFBS_dl|FBsf0000304680);(TF_binding_site|BDTNP1_TFBS_Med|FBsf0000281671);(TF_binding_site|BDTNP1_TFBS_twi|FBsf0000202557);(TF_binding_site|mE1_TFBS_HSA|FBsf0000360644)
13	3	2L_11508739_SNP	FBgn0032363	CG6509	DOWNSTREAM	35	T	A	A	0.4211	16	22	-0.6333	1.67882e-06	-
13	3	2L_11508739_SNP	FBgn0032362	spz4	DOWNSTREAM	90	T	A	A	0.4211	16	22	-0.6333	1.67882e-06	-
13	3	3L_12399910_SNP	FBgn0052103	CG32103	INTRON	0	A	C	A	0.4615	18	21	0.6382	1.07411e-06	-
13	4	2L_13737036_SNP	FBgn0051813	CG31813	DOWNSTREAM	6	T	G	G	0.3243	12	25	-0.456	8.0516e-07	-
13	4	2L_3519882_SNP	FBgn0031546	CG8851	SYNONYMOUS_CODING	0	T	C	C	0.1282	5	34	-0.6047	1.4769e-06	-
13	4	2L_3519882_SNP	FBgn0031545	CG3213	UPSTREAM	231	T	C	C	0.1282	5	34	-0.6047	1.4769e-06	-
13	4	2L_5376230_SNP	Intergenic	Intergenic			A	G	A	0.45	18	22	0.43	5.17104e-07	-
13	4	2R_16994041_SNP	FBgn0015721	ktub	INTRON	0	T	A	T	0.1316	5	33	-0.6174	8.69548e-07	-
13	4	2R_16994055_DEL	FBgn0015721	ktub	INTRON	0	AT	A	AT	0.1579	6	32	-0.5837	5.03508e-07	-
13	4	2R_16994059_SNP	FBgn0015721	ktub	INTRON	0	T	A	T	0.1538	6	33	-0.5793	5.87793e-07	-
13	4	2R_16994062_SNP	FBgn0015721	ktub	INTRON	0	G	T	G	0.1538	6	33	-0.5793	5.87793e-07	-
13	4	3L_3002531_SNP	FBgn0035385	FMRFaR	INTRON	0	T	C	C	0.2564	10	29	-0.46	1.71147e-06	-
14	1	3R_19698843_SNP	FBgn0025574	Pli	INTRON	0	C	A	A	0.275	11	29	-2.107	1.40436e-06	(TF_binding_site|BDTNP1_TFBS_da|FBsf0000330317);(TF_binding_site|BDTNP1_TFBS_z|FBsf0000197828);(TF_binding_site|mE1_TFBS_HSA|FBsf0000374621);(TF_binding_site|mE1_TFBS_sens|FBsf0000233207);(TF_binding_site|mE1_TFBS_Trl|FBsf0000341626)
14	2	2L_10703441_SNP	FBgn0024740	Lip2	INTRON	0	A	C	C	0.1667	6	30	-1.311	1.48026e-06	(TF_binding_site|BDTNP1_TFBS_dl|FBsf0000297984);(TF_binding_site|mE1_TFBS_HSA|FBsf0000347488)
14	2	2L_10703441_SNP	FBgn0032287	CG6415	UPSTREAM	180	A	C	C	0.1667	6	30	-1.311	1.48026e-06	(TF_binding_site|BDTNP1_TFBS_dl|FBsf0000297984);(TF_binding_site|mE1_TFBS_HSA|FBsf0000347488)
14	2	2L_10703510_SNP	FBgn0024740	Lip2	INTRON	0	T	C	C	0.2051	8	31	-1.173	4.51846e-07	(TF_binding_site|BDTNP1_TFBS_dl|FBsf0000297984);(TF_binding_site|mE1_TFBS_HSA|FBsf0000347488)
14	2	2L_10703510_SNP	FBgn0032287	CG6415	UPSTREAM	111	T	C	C	0.2051	8	31	-1.173	4.51846e-07	(TF_binding_site|BDTNP1_TFBS_dl|FBsf0000297984);(TF_binding_site|mE1_TFBS_HSA|FBsf0000347488)
14	2	2L_10718495_SNP	Intergenic	Intergenic			A	G	G	0.225	9	31	-1.139	2.56942e-07	-
14	2	2R_13174745_SNP	FBgn0265487	mbl	INTRON	0	A	C	C	0.4054	15	22	-1.07	1.37031e-07	(TF_binding_site|BDTNP1_TFBS_ftz|FBsf0000295220);(TF_binding_site|mE1_TFBS_HSA|FBsf0000357674)
14	2	3R_5247535_SNP	FBgn0261552	ps	INTRON	0	G	T	T	0.1026	4	35	-1.577	5.5913e-07	-
14	2	3R_6626921_SNP	FBgn0037836	CG14692	NON_SYNONYMOUS_CODING	0	T	G	G	0.2286	8	27	-1.162	1.00374e-06	(TF_binding_site|mE1_TFBS_kn|FBsf0000336609)
14	2	3R_9336088_SNP	Intergenic	Intergenic			C	T	C	0.1053	4	34	-1.608	3.29323e-07	-
14	2	X_15898624_SNP	FBgn0003969	vap	INTRON	0	T	C	C	0.1212	4	29	-1.553	1.29368e-06	(TF_binding_site|mE1_TFBS_D|FBsf0000238805);(TF_binding_site|mE1_TFBS_HSA|FBsf0000348375);(TF_binding_site|mE1_TFBS_zfh1|FBsf0000335224)
14	3	2L_3960939_SNP	FBgn0051774	fred	INTRON	0	G	T	T	0.4737	18	20	0.831	3.73272e-07	-
14	5	3L_19529344_SNP	FBgn0036881	Cpr76Bd	NON_SYNONYMOUS_CODING	0	A	G	A	0.4595	17	20	0.7453	9.55227e-07	(TF_binding_site|mE1_TFBS_cad|FBsf0000245397);(TF_binding_site|mE1_TFBS_chinmo|FBsf0000210411);(TF_binding_site|mE1_TFBS_HSA|FBsf0000366853);(TF_binding_site|mE1_TFBS_HSA|FBsf0000366854);(TF_binding_site|mE1_TFBS_sens|FBsf0000225217)
14	6	2L_12198422_SNP	FBgn0000114	aret	INTRON	0	A	T	T	0.3784	14	23	0.7109	1.55292e-06	-
14	7	3L_3496718_SNP	FBgn0259224	CG42324	INTRON	0	T	G	G	0.3421	13	25	-0.6807	1.39718e-06	-
14	7	3L_3962383_SNP	FBgn0035481	CG12605	UTR_5_PRIME	0	A	G	G	0.45	18	22	0.6446	7.34692e-07	-
14	8	2L_14675959_SNP	FBgn0003016	osp	INTRON	0	T	A	A	0.1282	5	34	0.8581	7.29097e-07	-
14	8	2R_15680819_SNP	Intergenic	Intergenic			C	T	T	0.1538	6	33	0.8033	5.31297e-07	-
14	8	2R_7049458_SNP	FBgn0003396	shn	INTRON	0	T	A	A	0.1538	6	33	0.7845	1.65234e-06	-
14	8	2R_7049458_SNP	FBgn0033579	CG13229	INTRON	0	T	A	A	0.1538	6	33	0.7845	1.65234e-06	-
14	8	3L_19293435_SNP	FBgn0003089	pip	DOWNSTREAM	66	T	G	G	0.3684	14	24	0.5951	1.59017e-06	-
14	8	3L_19293448_SNP	FBgn0003089	pip	DOWNSTREAM	53	T	A	A	0.3611	13	23	0.6237	9.37051e-07	-
14	8	3R_24901596_SNP	FBgn0039633	CG11873	INTRON	0	A	G	G	0.1	4	36	0.9152	1.38163e-06	(TF_binding_site|BDTNP1_TFBS_dl|FBsf0000314490);(TF_binding_site|mE1_TFBS_cad|FBsf0000249477)
14	8	3R_24901598_SNP	FBgn0039633	CG11873	INTRON	0	A	T	T	0.1	4	36	0.9152	1.38163e-06	(TF_binding_site|BDTNP1_TFBS_dl|FBsf0000314490);(TF_binding_site|mE1_TFBS_cad|FBsf0000249477)
14	8	3R_24901624_SNP	FBgn0039633	CG11873	INTRON	0	T	A	A	0.1	4	36	0.9152	1.38163e-06	(TF_binding_site|BDTNP1_TFBS_dl|FBsf0000314490);(TF_binding_site|mE1_TFBS_cad|FBsf0000249477)
14	9	X_18644113_SNP	Intergenic	Intergenic			T	C	C	0.2895	11	27	0.6345	1.82333e-06	-
14	10	2L_15333719_SNP	FBgn0001981	esg	UPSTREAM	147	C	T	C	0.1538	6	33	0.7281	1.76773e-06	(silencer|mE1_HDAC_PRE|FBsf0000343392);(TF_binding_site|BDTNP1_TFBS_bcd|FBsf0000333716);(TF_binding_site|BDTNP1_TFBS_da|FBsf0000322539);(TF_binding_site|BDTNP1_TFBS_dl|FBsf0000298777);(TF_binding_site|BDTNP1_TFBS_gt|FBsf0000293242);(TF_binding_site|BDTNP1_TFBS_hb|FBsf0000290849);(TF_binding_site|BDTNP1_TFBS_Med|FBsf0000278657);(TF_binding_site|BDTNP1_TFBS_prd|FBsf0000275092);(TF_binding_site|BDTN…
14	10	2R_9590291_SNP	FBgn0000633	fas	INTRON	0	T	C	C	0.1026	4	35	0.8679	1.64014e-06	-
14	10	2R_9590647_SNP	FBgn0000633	fas	INTRON	0	G	C	C	0.1026	4	35	0.8679	1.64014e-06	-
14	10	3L_5980882_SNP	Intergenic	Intergenic			C	G	C	0.3333	12	24	0.5895	4.16396e-07	(TF_binding_site|BDTNP1_TFBS_z|FBsf0000197019);(TF_binding_site|mE1_TFBS_HSA|FBsf0000362549)
14	10	X_19503901_SNP	FBgn0031037	CG14207	INTRON	0	T	C	C	0.15	6	34	0.7599	3.55606e-07	(TF_binding_site|BDTNP1_TFBS_da|FBsf0000333117);(TF_binding_site|BDTNP1_TFBS_twi|FBsf0000263769);(TF_binding_site|mE1_TFBS_HSA|FBsf0000349646)
14	10	X_5447343_SNP	FBgn0263512	Vsx2	INTRON	0	T	G	G	0.4737	18	20	-0.5409	1.07898e-06	(TF_binding_site|BDTNP1_TFBS_dl|FBsf0000316779)
15	2	3L_2518216_SNP	FBgn0266680	CR45170	INTRON	0	T	A	A	0.125	5	35	-1.162	4.22206e-07	-
15	2	3L_2518216_SNP	FBgn0010905	Spn	INTRON	0	T	A	A	0.125	5	35	-1.162	4.22206e-07	-
15	2	3L_3966238_SNP	Intergenic	Intergenic			C	T	C	0.225	9	31	-0.9039	6.05525e-07	-
15	2	3L_4999703_SNP	FBgn0005775	Con	INTRON	0	G	A	A	0.325	13	27	-0.8157	1.22123e-06	(TF_binding_site|BDTNP1_TFBS_twi|FBsf0000202981);(TF_binding_site|mE1_TFBS_HSA|FBsf0000362293)
15	2	3L_6681342_SNP	Intergenic	Intergenic			A	G	G	0.2051	8	31	-0.9895	3.79901e-07	-
15	2	3L_6681685_SNP	FBgn0035710	SP1173	DOWNSTREAM	742	C	T	T	0.1842	7	31	-1.025	7.59607e-07	-
15	2	3L_6681698_INS	FBgn0035710	SP1173	DOWNSTREAM	728	TT	T	T	0.1842	7	31	-1.025	7.59607e-07	-
15	2	3L_6683369_SNP	FBgn0035710	SP1173	SYNONYMOUS_CODING	0	T	C	C	0.2051	8	31	-0.9895	3.79901e-07	-
15	2	3L_6683372_SNP	FBgn0035710	SP1173	SYNONYMOUS_CODING	0	T	C	C	0.2051	8	31	-0.9895	3.79901e-07	-
15	2	3L_6686983_DEL	FBgn0035710	SP1173	INTRON	0	A	ACCAGCTAATTGAACA	ACCAGCTAATTGAACA	0.2778	10	26	-0.9379	2.55496e-07	-
15	2	3R_17829544_SNP	FBgn0264490	Eip93F	INTRON	0	T	A	A	0.2	8	32	-0.9822	1.72792e-07	-
15	3	2L_20390534_SNP	FBgn0032857	CG10947	INTRON	0	A	G	A	0.35	14	26	0.6534	1.75292e-06	(TF_binding_site|mE1_TFBS_inv|FBsf0000235107)
15	3	2R_11466800_SNP	Intergenic	Intergenic			C	T	T	0.475	19	21	-0.6131	5.5256e-07	-
15	4	2L_14471927_SNP	Intergenic	Intergenic			G	A	A	0.1795	7	32	-0.6587	1.59644e-06	-
15	4	2L_1741902_SNP	FBgn0264494	CG17646	SYNONYMOUS_CODING	0	A	C	A	0.275	11	29	-0.609	2.24322e-07	(TF_binding_site|mE1_TFBS_chinmo|FBsf0000207000);(TF_binding_site|mE1_TFBS_HSA|FBsf0000344469)
15	4	2L_1741985_SNP	FBgn0264494	CG17646	SYNONYMOUS_CODING	0	C	T	C	0.2564	10	29	-0.6157	2.34956e-07	(TF_binding_site|mE1_TFBS_chinmo|FBsf0000207000);(TF_binding_site|mE1_TFBS_HSA|FBsf0000344469)
15	4	2R_5647633_SNP	FBgn0005614	trpl	INTRON	0	A	T	T	0.225	9	31	-0.6364	6.22283e-07	-
15	4	2R_7324132_SNP	FBgn0033635	CG7777	INTRON	0	C	T	T	0.4286	15	20	-0.5518	1.2897e-06	-
15	4	2R_9075860_SNP	FBgn0053182	Kdm4B	INTRON	0	A	C	C	0.175	7	33	-0.6842	1.72364e-06	(TF_binding_site|BDTNP1_TFBS_da|FBsf0000324077);(TF_binding_site|BDTNP1_TFBS_dl|FBsf0000301826);(TF_binding_site|BDTNP1_TFBS_Med|FBsf0000280174);(TF_binding_site|BDTNP1_TFBS_twi|FBsf0000199241);(TF_binding_site|mE1_TFBS_cad|FBsf0000246528)
15	4	2R_9075860_SNP	FBgn0028991	seq	INTRON	0	A	C	C	0.175	7	33	-0.6842	1.72364e-06	(TF_binding_site|BDTNP1_TFBS_da|FBsf0000324077);(TF_binding_site|BDTNP1_TFBS_dl|FBsf0000301826);(TF_binding_site|BDTNP1_TFBS_Med|FBsf0000280174);(TF_binding_site|BDTNP1_TFBS_twi|FBsf0000199241);(TF_binding_site|mE1_TFBS_cad|FBsf0000246528)
15	4	2R_9075860_SNP	FBgn0033802	CG17724	INTRON	0	A	C	C	0.175	7	33	-0.6842	1.72364e-06	(TF_binding_site|BDTNP1_TFBS_da|FBsf0000324077);(TF_binding_site|BDTNP1_TFBS_dl|FBsf0000301826);(TF_binding_site|BDTNP1_TFBS_Med|FBsf0000280174);(TF_binding_site|BDTNP1_TFBS_twi|FBsf0000199241);(TF_binding_site|mE1_TFBS_cad|FBsf0000246528)
15	4	X_13462585_SNP	FBgn0086674	Tango13	INTRON	0	C	A	A	0.4286	15	20	0.5542	6.54507e-07	-
16	1	2L_6778523_SNP	FBgn0015776	nrv1	DOWNSTREAM	32	A	G	G	0.125	4	28	-3.046	1.40807e-06	-
16	1	2L_6778523_SNP	FBgn0031858	CG17378	DOWNSTREAM	79	A	G	G	0.125	4	28	-3.046	1.40807e-06	-
16	1	2R_10509837_SNP	FBgn0082939	snoRNA:Me28S-C3227b	EXON	0	T	G	G	0.3056	11	25	-2.105	1.40254e-06	(TF_binding_site|BDTNP1_TFBS_dl|FBsf0000302161);(TF_binding_site|BDTNP1_TFBS_hb|FBsf0000290177);(TF_binding_site|BDTNP1_TFBS_Med|FBsf0000280361);(TF_binding_site|BDTNP1_TFBS_twi|FBsf0000199384);(TF_binding_site|mE1_TFBS_D|FBsf0000240668);(TF_binding_site|mE1_TFBS_HSA|FBsf0000356773);(TF_binding_site|mE1_TFBS_kn|FBsf0000336362);(TF_binding_site|mE1_TFBS_zfh1|FBsf0000334691)
16	1	2R_10509837_SNP	FBgn0083123	Uhg5	INTRON	0	T	G	G	0.3056	11	25	-2.105	1.40254e-06	(TF_binding_site|BDTNP1_TFBS_dl|FBsf0000302161);(TF_binding_site|BDTNP1_TFBS_hb|FBsf0000290177);(TF_binding_site|BDTNP1_TFBS_Med|FBsf0000280361);(TF_binding_site|BDTNP1_TFBS_twi|FBsf0000199384);(TF_binding_site|mE1_TFBS_D|FBsf0000240668);(TF_binding_site|mE1_TFBS_HSA|FBsf0000356773);(TF_binding_site|mE1_TFBS_kn|FBsf0000336362);(TF_binding_site|mE1_TFBS_zfh1|FBsf0000334691)
16	1	2R_10509837_SNP	FBgn0082940	snoRNA:Me28S-C3227a	DOWNSTREAM	165	T	G	G	0.3056	11	25	-2.105	1.40254e-06	(TF_binding_site|BDTNP1_TFBS_dl|FBsf0000302161);(TF_binding_site|BDTNP1_TFBS_hb|FBsf0000290177);(TF_binding_site|BDTNP1_TFBS_Med|FBsf0000280361);(TF_binding_site|BDTNP1_TFBS_twi|FBsf0000199384);(TF_binding_site|mE1_TFBS_D|FBsf0000240668);(TF_binding_site|mE1_TFBS_HSA|FBsf0000356773);(TF_binding_site|mE1_TFBS_kn|FBsf0000336362);(TF_binding_site|mE1_TFBS_zfh1|FBsf0000334691)
16	1	2R_10509837_SNP	FBgn0082926	snoRNA:Me28S-U1848	UPSTREAM	238	T	G	G	0.3056	11	25	-2.105	1.40254e-06	(TF_binding_site|BDTNP1_TFBS_dl|FBsf0000302161);(TF_binding_site|BDTNP1_TFBS_hb|FBsf0000290177);(TF_binding_site|BDTNP1_TFBS_Med|FBsf0000280361);(TF_binding_site|BDTNP1_TFBS_twi|FBsf0000199384);(TF_binding_site|mE1_TFBS_D|FBsf0000240668);(TF_binding_site|mE1_TFBS_HSA|FBsf0000356773);(TF_binding_site|mE1_TFBS_kn|FBsf0000336362);(TF_binding_site|mE1_TFBS_zfh1|FBsf0000334691)
16	1	2R_10509837_SNP	FBgn0082951	snoRNA:Me18S-C1366	DOWNSTREAM	451	T	G	G	0.3056	11	25	-2.105	1.40254e-06	(TF_binding_site|BDTNP1_TFBS_dl|FBsf0000302161);(TF_binding_site|BDTNP1_TFBS_hb|FBsf0000290177);(TF_binding_site|BDTNP1_TFBS_Med|FBsf0000280361);(TF_binding_site|BDTNP1_TFBS_twi|FBsf0000199384);(TF_binding_site|mE1_TFBS_D|FBsf0000240668);(TF_binding_site|mE1_TFBS_HSA|FBsf0000356773);(TF_binding_site|mE1_TFBS_kn|FBsf0000336362);(TF_binding_site|mE1_TFBS_zfh1|FBsf0000334691)
16	1	2R_10509837_SNP	FBgn0082950	snoRNA:Me18S-G1952	UPSTREAM	470	T	G	G	0.3056	11	25	-2.105	1.40254e-06	(TF_binding_site|BDTNP1_TFBS_dl|FBsf0000302161);(TF_binding_site|BDTNP1_TFBS_hb|FBsf0000290177);(TF_binding_site|BDTNP1_TFBS_Med|FBsf0000280361);(TF_binding_site|BDTNP1_TFBS_twi|FBsf0000199384);(TF_binding_site|mE1_TFBS_D|FBsf0000240668);(TF_binding_site|mE1_TFBS_HSA|FBsf0000356773);(TF_binding_site|mE1_TFBS_kn|FBsf0000336362);(TF_binding_site|mE1_TFBS_zfh1|FBsf0000334691)
16	1	2R_10509837_SNP	FBgn0082952	snoRNA:Me18S-A1061	UPSTREAM	710	T	G	G	0.3056	11	25	-2.105	1.40254e-06	(TF_binding_site|BDTNP1_TFBS_dl|FBsf0000302161);(TF_binding_site|BDTNP1_TFBS_hb|FBsf0000290177);(TF_binding_site|BDTNP1_TFBS_Med|FBsf0000280361);(TF_binding_site|BDTNP1_TFBS_twi|FBsf0000199384);(TF_binding_site|mE1_TFBS_D|FBsf0000240668);(TF_binding_site|mE1_TFBS_HSA|FBsf0000356773);(TF_binding_site|mE1_TFBS_kn|FBsf0000336362);(TF_binding_site|mE1_TFBS_zfh1|FBsf0000334691)
16	1	2R_10509837_SNP	FBgn0082941	snoRNA:Me28S-A992	UPSTREAM	944	T	G	G	0.3056	11	25	-2.105	1.40254e-06	(TF_binding_site|BDTNP1_TFBS_dl|FBsf0000302161);(TF_binding_site|BDTNP1_TFBS_hb|FBsf0000290177);(TF_binding_site|BDTNP1_TFBS_Med|FBsf0000280361);(TF_binding_site|BDTNP1_TFBS_twi|FBsf0000199384);(TF_binding_site|mE1_TFBS_D|FBsf0000240668);(TF_binding_site|mE1_TFBS_HSA|FBsf0000356773);(TF_binding_site|mE1_TFBS_kn|FBsf0000336362);(TF_binding_site|mE1_TFBS_zfh1|FBsf0000334691)
16	1	2R_10509839_SNP	FBgn0083123	Uhg5	INTRON	0	T	A	A	0.3056	11	25	-2.105	1.40254e-06	(TF_binding_site|BDTNP1_TFBS_dl|FBsf0000302161);(TF_binding_site|BDTNP1_TFBS_hb|FBsf0000290177);(TF_binding_site|BDTNP1_TFBS_Med|FBsf0000280361);(TF_binding_site|BDTNP1_TFBS_twi|FBsf0000199384);(TF_binding_site|mE1_TFBS_D|FBsf0000240668);(TF_binding_site|mE1_TFBS_HSA|FBsf0000356773);(TF_binding_site|mE1_TFBS_kn|FBsf0000336362);(TF_binding_site|mE1_TFBS_zfh1|FBsf0000334691)
16	1	2R_10509839_SNP	FBgn0082939	snoRNA:Me28S-C3227b	EXON	0	T	A	A	0.3056	11	25	-2.105	1.40254e-06	(TF_binding_site|BDTNP1_TFBS_dl|FBsf0000302161);(TF_binding_site|BDTNP1_TFBS_hb|FBsf0000290177);(TF_binding_site|BDTNP1_TFBS_Med|FBsf0000280361);(TF_binding_site|BDTNP1_TFBS_twi|FBsf0000199384);(TF_binding_site|mE1_TFBS_D|FBsf0000240668);(TF_binding_site|mE1_TFBS_HSA|FBsf0000356773);(TF_binding_site|mE1_TFBS_kn|FBsf0000336362);(TF_binding_site|mE1_TFBS_zfh1|FBsf0000334691)
16	1	2R_10509839_SNP	FBgn0082940	snoRNA:Me28S-C3227a	DOWNSTREAM	167	T	A	A	0.3056	11	25	-2.105	1.40254e-06	(TF_binding_site|BDTNP1_TFBS_dl|FBsf0000302161);(TF_binding_site|BDTNP1_TFBS_hb|FBsf0000290177);(TF_binding_site|BDTNP1_TFBS_Med|FBsf0000280361);(TF_binding_site|BDTNP1_TFBS_twi|FBsf0000199384);(TF_binding_site|mE1_TFBS_D|FBsf0000240668);(TF_binding_site|mE1_TFBS_HSA|FBsf0000356773);(TF_binding_site|mE1_TFBS_kn|FBsf0000336362);(TF_binding_site|mE1_TFBS_zfh1|FBsf0000334691)
16	1	2R_10509839_SNP	FBgn0082926	snoRNA:Me28S-U1848	UPSTREAM	236	T	A	A	0.3056	11	25	-2.105	1.40254e-06	(TF_binding_site|BDTNP1_TFBS_dl|FBsf0000302161);(TF_binding_site|BDTNP1_TFBS_hb|FBsf0000290177);(TF_binding_site|BDTNP1_TFBS_Med|FBsf0000280361);(TF_binding_site|BDTNP1_TFBS_twi|FBsf0000199384);(TF_binding_site|mE1_TFBS_D|FBsf0000240668);(TF_binding_site|mE1_TFBS_HSA|FBsf0000356773);(TF_binding_site|mE1_TFBS_kn|FBsf0000336362);(TF_binding_site|mE1_TFBS_zfh1|FBsf0000334691)
16	1	2R_10509839_SNP	FBgn0082951	snoRNA:Me18S-C1366	DOWNSTREAM	453	T	A	A	0.3056	11	25	-2.105	1.40254e-06	(TF_binding_site|BDTNP1_TFBS_dl|FBsf0000302161);(TF_binding_site|BDTNP1_TFBS_hb|FBsf0000290177);(TF_binding_site|BDTNP1_TFBS_Med|FBsf0000280361);(TF_binding_site|BDTNP1_TFBS_twi|FBsf0000199384);(TF_binding_site|mE1_TFBS_D|FBsf0000240668);(TF_binding_site|mE1_TFBS_HSA|FBsf0000356773);(TF_binding_site|mE1_TFBS_kn|FBsf0000336362);(TF_binding_site|mE1_TFBS_zfh1|FBsf0000334691)
16	1	2R_10509839_SNP	FBgn0082950	snoRNA:Me18S-G1952	UPSTREAM	468	T	A	A	0.3056	11	25	-2.105	1.40254e-06	(TF_binding_site|BDTNP1_TFBS_dl|FBsf0000302161);(TF_binding_site|BDTNP1_TFBS_hb|FBsf0000290177);(TF_binding_site|BDTNP1_TFBS_Med|FBsf0000280361);(TF_binding_site|BDTNP1_TFBS_twi|FBsf0000199384);(TF_binding_site|mE1_TFBS_D|FBsf0000240668);(TF_binding_site|mE1_TFBS_HSA|FBsf0000356773);(TF_binding_site|mE1_TFBS_kn|FBsf0000336362);(TF_binding_site|mE1_TFBS_zfh1|FBsf0000334691)
16	1	2R_10509839_SNP	FBgn0082952	snoRNA:Me18S-A1061	UPSTREAM	708	T	A	A	0.3056	11	25	-2.105	1.40254e-06	(TF_binding_site|BDTNP1_TFBS_dl|FBsf0000302161);(TF_binding_site|BDTNP1_TFBS_hb|FBsf0000290177);(TF_binding_site|BDTNP1_TFBS_Med|FBsf0000280361);(TF_binding_site|BDTNP1_TFBS_twi|FBsf0000199384);(TF_binding_site|mE1_TFBS_D|FBsf0000240668);(TF_binding_site|mE1_TFBS_HSA|FBsf0000356773);(TF_binding_site|mE1_TFBS_kn|FBsf0000336362);(TF_binding_site|mE1_TFBS_zfh1|FBsf0000334691)
16	1	2R_10509839_SNP	FBgn0082941	snoRNA:Me28S-A992	UPSTREAM	942	T	A	A	0.3056	11	25	-2.105	1.40254e-06	(TF_binding_site|BDTNP1_TFBS_dl|FBsf0000302161);(TF_binding_site|BDTNP1_TFBS_hb|FBsf0000290177);(TF_binding_site|BDTNP1_TFBS_Med|FBsf0000280361);(TF_binding_site|BDTNP1_TFBS_twi|FBsf0000199384);(TF_binding_site|mE1_TFBS_D|FBsf0000240668);(TF_binding_site|mE1_TFBS_HSA|FBsf0000356773);(TF_binding_site|mE1_TFBS_kn|FBsf0000336362);(TF_binding_site|mE1_TFBS_zfh1|FBsf0000334691)
16	1	3L_14561340_SNP	FBgn0261816	CG42758	DOWNSTREAM	107	T	C	C	0.1081	4	33	-3.042	1.17775e-06	-
16	1	3L_14697839_SNP	FBgn0259175	ome	INTRON	0	G	A	A	0.125	5	35	-2.796	5.25803e-07	-
16	1	3L_14697839_SNP	FBgn0036441	CG13476	UPSTREAM	725	G	A	A	0.125	5	35	-2.796	5.25803e-07	-
16	1	3L_14697840_SNP	FBgn0259175	ome	INTRON	0	G	A	A	0.125	5	35	-2.796	5.25803e-07	-
16	1	3L_14697840_SNP	FBgn0036441	CG13476	UPSTREAM	724	G	A	A	0.125	5	35	-2.796	5.25803e-07	-
16	1	3R_20721560_SNP	FBgn0039244	CG11069	INTRON	0	T	G	G	0.25	10	30	-2.111	1.66907e-06	(TF_binding_site|BDTNP1_TFBS_da|FBsf0000330420);(TF_binding_site|mE1_TFBS_HSA|FBsf0000374993);(TF_binding_site|mE1_TFBS_Trl|FBsf0000341690)
16	1	X_5500955_SNP	FBgn0263511	Vsx1	INTRON	0	C	A	A	0.1	4	36	-3.073	6.90548e-07	(TF_binding_site|mE1_TFBS_cad|FBsf0000242875);(TF_binding_site|mE1_TFBS_chinmo|FBsf0000208349)
16	2	2L_8267622_INS	FBgn0003502	Btk29A	INTRON	0	A	ACGCACTGCACAAAAAAGAAA	A	0.4054	15	22	1.238	3.9825e-07	(TF_binding_site|mE1_TFBS_D|FBsf0000238003)
16	2	3R_18624172_SNP	Intergenic	Intergenic			A	G	A	0.2821	11	28	1.325	4.12098e-07	-
16	3	2L_1060385_SNP	FBgn0003310	S	INTRON	0	A	T	T	0.45	18	22	0.9094	2.15417e-06	-
16	3	2L_1060401_SNP	FBgn0003310	S	INTRON	0	T	A	A	0.45	18	22	0.9094	2.15417e-06	-
16	3	2L_1692295_SNP	FBgn0086758	chinmo	INTRON	0	T	A	T	0.3529	12	22	1.053	9.26928e-07	-
16	3	2L_1692343_SNP	FBgn0086758	chinmo	INTRON	0	T	G	T	0.3784	14	23	0.9975	8.42206e-07	-
16	3	2R_20440322_SNP	FBgn0035021	CG4622	INTRON	0	A	C	C	0.15	6	34	1.278	1.63486e-06	(TF_binding_site|mE1_TFBS_chinmo|FBsf0000212078)
16	3	2R_20440322_SNP	FBgn0035023	ITP	INTRON	0	A	C	C	0.15	6	34	1.278	1.63486e-06	(TF_binding_site|mE1_TFBS_chinmo|FBsf0000212078)
16	3	2R_20440465_SNP	FBgn0035023	ITP	INTRON	0	T	G	G	0.15	6	34	1.278	1.63486e-06	(TF_binding_site|mE1_TFBS_chinmo|FBsf0000212078)
16	3	2R_20440465_SNP	FBgn0035021	CG4622	INTRON	0	T	G	G	0.15	6	34	1.278	1.63486e-06	(TF_binding_site|mE1_TFBS_chinmo|FBsf0000212078)
16	3	2R_20444141_SNP	FBgn0035023	ITP	DOWNSTREAM	141	T	A	A	0.175	7	33	1.222	9.13187e-07	-
16	3	2R_20444141_SNP	FBgn0035021	CG4622	UPSTREAM	318	T	A	A	0.175	7	33	1.222	9.13187e-07	-
16	3	3L_12321038_SNP	Intergenic	Intergenic			T	G	T	0.3333	13	26	0.9733	1.7605e-06	-
16	3	3L_4986192_SNP	FBgn0005775	Con	INTRON	0	T	C	C	0.4	16	24	0.9486	5.31803e-07	-
16	3	3R_24354460_SNP	FBgn0003137	Ppn	NON_SYNONYMOUS_CODING	0	T	G	T	0.3077	12	27	1.025	7.18029e-07	(TF_binding_site|mE1_TFBS_HSA|FBsf0000376004);(TF_binding_site|mE1_TFBS_sens|FBsf0000233856)
16	3	3R_24354461_SNP	FBgn0003137	Ppn	SYNONYMOUS_CODING	0	G	A	G	0.3	12	28	1.019	7.47119e-07	(TF_binding_site|mE1_TFBS_HSA|FBsf0000376004);(TF_binding_site|mE1_TFBS_sens|FBsf0000233856)
16	4	2L_9225342_SNP	FBgn0041092	tai	INTRON	0	A	T	A	0.4595	17	20	0.8459	1.07451e-06	(TF_binding_site|mE1_TFBS_bab1|FBsf0000214051);(TF_binding_site|mE1_TFBS_cad|FBsf0000241740)
16	4	2R_7114493_SNP	FBgn0050021	metro	UTR_3_PRIME	0	C	T	C	0.4103	16	23	-0.8301	2.09861e-06	(TF_binding_site|mE1_TFBS_cad|FBsf0000246336)
16	4	2R_7114493_SNP	FBgn0033584	CG7737	DOWNSTREAM	242	C	T	C	0.4103	16	23	-0.8301	2.09861e-06	(TF_binding_site|mE1_TFBS_cad|FBsf0000246336)
16	4	3L_14234288_SNP	Intergenic	Intergenic			A	T	T	0.375	15	25	-0.8299	1.32661e-06	(TF_binding_site|mE1_TFBS_cad|FBsf0000244997)
16	4	3L_14234294_SNP	Intergenic	Intergenic			T	G	G	0.375	15	25	-0.8299	1.32661e-06	(TF_binding_site|mE1_TFBS_cad|FBsf0000244997)
16	4	3L_7611912_SNP	FBgn0035802	CG33275	INTRON	0	T	A	A	0.4474	17	21	-0.8201	1.91711e-06	-
16	5	3L_15634547_SNP	FBgn0259236	comm3	INTRON	0	T	A	A	0.2632	10	28	-0.808	5.71228e-07	-
16	5	3L_6876378_DEL	FBgn0266965	CR45416	DOWNSTREAM	42	TT	T	TT	0.375	15	25	-0.698	1.21862e-06	-
16	5	3R_19819580_SNP	FBgn0015795	Rab7	INTRON	0	C	A	C	0.2308	9	30	-0.8078	1.70597e-06	(TF_binding_site|BDTNP1_TFBS_dl|FBsf0000313723);(TF_binding_site|mE1_TFBS_sens|FBsf0000233232)
16	5	3R_19819580_SNP	FBgn0039137	CG13604	UPSTREAM	942	C	A	C	0.2308	9	30	-0.8078	1.70597e-06	(TF_binding_site|BDTNP1_TFBS_dl|FBsf0000313723);(TF_binding_site|mE1_TFBS_sens|FBsf0000233232)
16	5	X_16897078_SNP	FBgn0266354	CG45002	INTRON	0	T	G	G	0.3333	13	26	-0.7156	1.96327e-06	-
16	5	X_21094808_INS	FBgn0052521	CG32521	INTRON	0	GATG	G	G	0.3333	13	26	-0.7187	9.935e-07	(TF_binding_site|mE1_TFBS_inv|FBsf0000235612)
16	6	2L_11452391_SNP	Intergenic	Intergenic			A	C	C	0.4872	19	20	-0.6546	1.51582e-06	(regulatory_region|FlyBase|FBsf0000161390);(regulatory_region|REDfly_CRMs|FBsf0000435069);(TF_binding_site|BDTNP1_TFBS_bcd|FBsf0000333682);(TF_binding_site|BDTNP1_TFBS_da|FBsf0000322175);(TF_binding_site|BDTNP1_TFBS_dl|FBsf0000298137);(TF_binding_site|BDTNP1_TFBS_gt|FBsf0000293165);(TF_binding_site|BDTNP1_TFBS_hb|FBsf0000290764);(TF_binding_site|BDTNP1_TFBS_kni|FBsf0000289713);(TF_binding_site|BD…
16	6	2R_17358713_SNP	FBgn0010415	Sdc	INTRON	0	C	G	G	0.1842	7	31	-0.8654	9.99367e-07	-
16	6	3L_24081087_SNP	FBgn0011288	Snap25	INTRON	0	C	G	G	0.3514	13	24	-0.7314	5.35936e-07	-
16	6	3L_24081099_SNP	FBgn0011288	Snap25	INTRON	0	C	T	T	0.3824	13	21	-0.7554	4.0018e-07	-
16	7	3R_9876346_DEL	Intergenic	Intergenic			G	CATT	CATT	0.2895	11	27	0.6611	1.13527e-06	(TF_binding_site|BDTNP1_TFBS_dl|FBsf0000311613);(TF_binding_site|mE1_TFBS_cad|FBsf0000248316);(TF_binding_site|mE1_TFBS_HSA|FBsf0000371424);(TF_binding_site|mE1_TFBS_Trl|FBsf0000341030)
16	8	3R_5237940_SNP	FBgn0037690	Task7	UTR_5_PRIME	0	G	C	C	0.4595	17	20	0.5597	1.94144e-06	(TF_binding_site|BDTNP1_TFBS_dl|FBsf0000310669);(TF_binding_site|BDTNP1_TFBS_hb|FBsf0000292352);(TF_binding_site|mE1_TFBS_D|FBsf0000239809);(TF_binding_site|mE1_TFBS_h|FBsf0000257320);(TF_binding_site|mE1_TFBS_hkb|FBsf0000255678);(TF_binding_site|mE1_TFBS_HSA|FBsf0000369900);(TF_binding_site|mE1_TFBS_jumu|FBsf0000254545);(TF_binding_site|mE1_TFBS_Kr|FBsf0000253704)
16	8	3R_5237940_SNP	FBgn0011740	alpha-Man-II	UPSTREAM	330	G	C	C	0.4595	17	20	0.5597	1.94144e-06	(TF_binding_site|BDTNP1_TFBS_dl|FBsf0000310669);(TF_binding_site|BDTNP1_TFBS_hb|FBsf0000292352);(TF_binding_site|mE1_TFBS_D|FBsf0000239809);(TF_binding_site|mE1_TFBS_h|FBsf0000257320);(TF_binding_site|mE1_TFBS_hkb|FBsf0000255678);(TF_binding_site|mE1_TFBS_HSA|FBsf0000369900);(TF_binding_site|mE1_TFBS_jumu|FBsf0000254545);(TF_binding_site|mE1_TFBS_Kr|FBsf0000253704)
16	8	X_7750633_SNP	Intergenic	Intergenic			A	T	T	0.2632	10	28	0.6209	2.05748e-06	-
17	2	3L_12793941_SNP	FBgn0260945	Atg1	INTRON	0	A	T	T	0.125	5	35	1.177	5.0576e-07	(TF_binding_site|BDTNP1_TFBS_twi|FBsf0000203631);(TF_binding_site|mE1_TFBS_HSA|FBsf0000364713)
17	2	3L_12793948_SNP	FBgn0260945	Atg1	INTRON	0	G	T	T	0.125	5	35	1.177	5.0576e-07	(TF_binding_site|BDTNP1_TFBS_twi|FBsf0000203631);(TF_binding_site|mE1_TFBS_HSA|FBsf0000364713)
17	2	3R_14053569_SNP	FBgn0262559	Mdh2	SYNONYMOUS_CODING	0	T	C	C	0.1	4	36	1.253	1.50786e-06	(TF_binding_site|mE1_TFBS_HSA|FBsf0000372822);(TF_binding_site|mE1_TFBS_sens|FBsf0000232348)
17	2	X_10596067_SNP	FBgn0052677	X11Lbeta	INTRON	0	A	T	T	0.1053	4	34	1.293	5.10463e-07	-
17	2	X_10596139_SNP	FBgn0052677	X11Lbeta	INTRON	0	C	G	G	0.125	5	35	1.137	1.50039e-06	-
17	3	2L_11005672_SNP	FBgn0021761	Nup154	SYNONYMOUS_CODING	0	G	C	C	0.359	14	25	0.7222	1.49604e-06	(TF_binding_site|mE1_TFBS_cad|FBsf0000241863);(TF_binding_site|mE1_TFBS_HSA|FBsf0000347561);(TF_binding_site|mE1_TFBS_sens|FBsf0000217235)
17	3	3L_10831154_SNP	Intergenic	Intergenic			C	T	T	0.4211	16	22	0.7489	1.51967e-06	(enhancer|mE1_CBP_Enhancers|FBsf0000343794)
17	3	3L_12454840_SNP	FBgn0000625	eyg	DOWNSTREAM	797	G	C	C	0.4103	16	23	-0.7225	9.53474e-07	(TF_binding_site|mE1_TFBS_inv|FBsf0000235968)
17	3	3R_13638869_SNP	FBgn0261649	tinc	INTRON	0	G	A	A	0.3333	11	22	0.8452	1.32188e-06	(TF_binding_site|BDTNP1_TFBS_dl|FBsf0000312500)
17	3	3R_25056903_SNP	FBgn0028476	CG15817	SYNONYMOUS_CODING	0	A	G	G	0.1282	5	34	1.082	1.72427e-06	(TF_binding_site|mE1_TFBS_cad|FBsf0000249490);(TF_binding_site|mE1_TFBS_chinmo|FBsf0000213656)
17	3	X_13083950_SNP	FBgn0030459	CG12723	SYNONYMOUS_CODING	0	C	T	T	0.1842	7	31	1.009	1.35574e-07	(TF_binding_site|mE1_TFBS_chinmo|FBsf0000208836)
17	3	X_13083950_SNP	FBgn0085440	CG34411	UPSTREAM	753	C	T	T	0.1842	7	31	1.009	1.35574e-07	(TF_binding_site|mE1_TFBS_chinmo|FBsf0000208836)
17	3	X_13083956_SNP	FBgn0030459	CG12723	NON_SYNONYMOUS_CODING	0	C	A	A	0.1795	7	32	1.006	1.94813e-07	(TF_binding_site|mE1_TFBS_chinmo|FBsf0000208836)
17	3	X_13083956_SNP	FBgn0085440	CG34411	UPSTREAM	759	C	A	A	0.1795	7	32	1.006	1.94813e-07	(TF_binding_site|mE1_TFBS_chinmo|FBsf0000208836)
17	3	X_13085287_SNP	FBgn0030459	CG12723	SYNONYMOUS_CODING	0	C	G	G	0.1389	5	31	1.106	1.15857e-06	(TF_binding_site|mE1_TFBS_chinmo|FBsf0000208836)
17	4	3R_10998263_INS	FBgn0038295	Gyc88E	INTRON	0	T	TC	T	0.4474	17	21	0.713	1.05791e-06	-
17	4	3R_10998263_INS	FBgn0038294	Mf	DOWNSTREAM	302	T	TC	T	0.4474	17	21	0.713	1.05791e-06	-
17	4	3R_11389176_SNP	Intergenic	Intergenic			T	C	C	0.4595	17	20	0.7245	1.47814e-06	-
17	6	2L_3646727_SNP	FBgn0000721	for	INTRON	0	A	G	G	0.125	5	35	-0.7544	9.44391e-07	-
17	6	3L_11693039_DEL	FBgn0036196	CG11658	DOWNSTREAM	151	A	AGGA	AGGA	0.2051	8	31	-0.6614	5.88512e-07	-
17	6	3L_11693039_DEL	FBgn0036195	CG6053	UPSTREAM	677	A	AGGA	AGGA	0.2051	8	31	-0.6614	5.88512e-07	-
17	6	3R_10505759_SNP	FBgn0265140	Meltrin	INTRON	0	A	G	A	0.4103	16	23	0.547	4.78701e-07	(TF_binding_site|BDTNP1_TFBS_bcd|FBsf0000334240);(TF_binding_site|BDTNP1_TFBS_da|FBsf0000329244);(TF_binding_site|BDTNP1_TFBS_dl|FBsf0000311735);(TF_binding_site|BDTNP1_TFBS_ftz|FBsf0000295451);(TF_binding_site|BDTNP1_TFBS_gt|FBsf0000294414);(TF_binding_site|BDTNP1_TFBS_hb|FBsf0000292490);(TF_binding_site|BDTNP1_TFBS_kni|FBsf0000289883);(TF_binding_site|BDTNP1_TFBS_Med|FBsf0000285339);(TF_binding…
17	6	X_2816350_SNP	FBgn0028369	kirre	INTRON	0	C	T	T	0.2973	11	26	-0.5644	1.04608e-06	(TF_binding_site|mE1_TFBS_chinmo|FBsf0000208246)
17	6	X_2816350_SNP	FBgn0025643	CG3588	SYNONYMOUS_CODING	0	C	T	T	0.2973	11	26	-0.5644	1.04608e-06	(TF_binding_site|mE1_TFBS_chinmo|FBsf0000208246)
17	7	2L_11363844_SNP	FBgn0000287	salr	INTRON	0	T	C	C	0.3077	12	27	0.518	9.79599e-07	(TF_binding_site|mE1_TFBS_HSA|FBsf0000347700)
17	7	2L_11363920_SNP	FBgn0000287	salr	INTRON	0	T	G	G	0.3333	13	26	0.5339	1.35292e-07	-
17	7	2L_11363946_SNP	FBgn0000287	salr	INTRON	0	G	T	G	0.3333	13	26	0.4964	2.01738e-06	-
17	7	2L_11365110_SNP	FBgn0000287	salr	INTRON	0	T	G	G	0.4242	14	19	0.5166	1.78393e-06	(TF_binding_site|BDTNP1_TFBS_prd|FBsf0000274997);(TF_binding_site|mE1_TFBS_HSA|FBsf0000347701)
17	7	2L_11365771_SNP	FBgn0000287	salr	INTRON	0	T	G	G	0.375	15	25	0.4849	1.19152e-06	-
17	7	2L_9664060_SNP	Intergenic	Intergenic			G	C	C	0.475	19	21	0.4895	2.66295e-07	-
17	7	2R_19052377_SNP	FBgn0085400	CG34371	SYNONYMOUS_CODING	0	G	A	A	0.4	14	21	0.5539	5.26822e-08	-
17	7	X_5905737_DEL	FBgn0029003	mab-21	INTRON	0	TGATTGGGGGACACTACCA	T	TGATTGGGGGACACTACCA	0.1842	7	31	0.6501	1.91798e-07	-
17	7	X_5905834_SNP	FBgn0029003	mab-21	INTRON	0	T	G	T	0.1842	7	31	0.6525	1.62439e-07	-
17	7	X_5905860_SNP	FBgn0029003	mab-21	INTRON	0	A	C	A	0.1892	7	30	0.6452	2.90602e-07	-
17	7	X_5905917_SNP	FBgn0029003	mab-21	INTRON	0	G	T	G	0.1795	7	32	0.6492	2.26508e-07	-
17	7	X_5905954_INS	FBgn0029003	mab-21	INTRON	0	T	TGAT	T	0.1795	7	32	0.6452	2.55285e-07	-
17	7	X_5905957_SNP	FBgn0029003	mab-21	INTRON	0	C	A	C	0.1842	7	31	0.6693	6.23996e-08	-
17	7	X_5905964_SNP	FBgn0029003	mab-21	INTRON	0	C	A	C	0.1795	7	32	0.646	2.41748e-07	-
17	7	X_5905965_SNP	FBgn0029003	mab-21	INTRON	0	C	A	C	0.175	7	33	0.642	2.74379e-07	-
17	7	X_5905966_INS	FBgn0029003	mab-21	INTRON	0	A	AAGGCAGGATGGT	A	0.175	7	33	0.642	2.74379e-07	-
17	7	X_5905991_SNP	FBgn0029003	mab-21	INTRON	0	T	C	T	0.1795	7	32	0.6418	2.91146e-07	-
17	7	X_5905993_SNP	FBgn0029003	mab-21	INTRON	0	G	C	G	0.175	7	33	0.642	2.74379e-07	-
17	7	X_5906002_INS	FBgn0029003	mab-21	INTRON	0	G	GTAATCTGCATTAG	G	0.175	7	33	0.642	2.74379e-07	(TF_binding_site|mE1_TFBS_chinmo|FBsf0000208403)
17	7	X_5906023_SNP	FBgn0029003	mab-21	INTRON	0	G	T	G	0.1842	7	31	0.652	1.83788e-07	(TF_binding_site|mE1_TFBS_cad|FBsf0000242908);(TF_binding_site|mE1_TFBS_chinmo|FBsf0000208403)
17	7	X_5906031_SNP	FBgn0029003	mab-21	INTRON	0	A	G	A	0.175	7	33	0.642	2.74379e-07	(TF_binding_site|mE1_TFBS_cad|FBsf0000242908);(TF_binding_site|mE1_TFBS_chinmo|FBsf0000208403)
17	7	X_5906038_SNP	FBgn0029003	mab-21	INTRON	0	T	A	T	0.175	7	33	0.642	2.74379e-07	(TF_binding_site|mE1_TFBS_cad|FBsf0000242908);(TF_binding_site|mE1_TFBS_chinmo|FBsf0000208403)
17	7	X_5906077_SNP	FBgn0029003	mab-21	INTRON	0	A	C	A	0.175	7	33	0.642	2.74379e-07	(TF_binding_site|mE1_TFBS_cad|FBsf0000242908);(TF_binding_site|mE1_TFBS_chinmo|FBsf0000208403)
18	1	2L_20676472_SNP	FBgn0086657	ik2	SYNONYMOUS_CODING	0	G	A	G	0.2821	11	28	1.963	1.56896e-06	(TF_binding_site|BDTNP1_TFBS_dl|FBsf0000299632)
18	1	2L_20676472_SNP	FBgn0051678	CG31678	UPSTREAM	531	G	A	G	0.2821	11	28	1.963	1.56896e-06	(TF_binding_site|BDTNP1_TFBS_dl|FBsf0000299632)
18	1	2L_20677096_SNP	FBgn0086657	ik2	SYNONYMOUS_CODING	0	T	C	T	0.275	11	29	1.953	1.54726e-06	(TF_binding_site|mE1_TFBS_sens|FBsf0000218480)
18	1	2R_17370316_SNP	FBgn0026369	Sara	NON_SYNONYMOUS_CODING	0	C	A	A	0.2308	9	30	2.07	1.98333e-06	(TF_binding_site|mE1_TFBS_cad|FBsf0000247187);(TF_binding_site|mE1_TFBS_sens|FBsf0000229220)
18	1	2R_7064260_SNP	FBgn0003396	shn	INTRON	0	T	G	G	0.2821	11	28	1.946	1.51973e-06	-
18	1	3L_9881826_SNP	FBgn0025866	CalpB	UPSTREAM	36	A	G	G	0.3	12	28	1.917	9.95883e-07	(TF_binding_site|BDTNP1_TFBS_dl|FBsf0000306585);(TF_binding_site|BDTNP1_TFBS_Med|FBsf0000282658);(TF_binding_site|BDTNP1_TFBS_twi|FBsf0000203361);(TF_binding_site|mE1_TFBS_cad|FBsf0000244641)
18	1	3L_9881826_SNP	FBgn0011836	Taf2	UPSTREAM	43	A	G	G	0.3	12	28	1.917	9.95883e-07	(TF_binding_site|BDTNP1_TFBS_dl|FBsf0000306585);(TF_binding_site|BDTNP1_TFBS_Med|FBsf0000282658);(TF_binding_site|BDTNP1_TFBS_twi|FBsf0000203361);(TF_binding_site|mE1_TFBS_cad|FBsf0000244641)
18	1	3L_9881828_SNP	FBgn0025866	CalpB	UPSTREAM	34	T	C	C	0.3	12	28	1.917	9.95883e-07	(TF_binding_site|BDTNP1_TFBS_dl|FBsf0000306585);(TF_binding_site|BDTNP1_TFBS_Med|FBsf0000282658);(TF_binding_site|BDTNP1_TFBS_twi|FBsf0000203361);(TF_binding_site|mE1_TFBS_cad|FBsf0000244641)
18	1	3L_9881828_SNP	FBgn0011836	Taf2	UPSTREAM	45	T	C	C	0.3	12	28	1.917	9.95883e-07	(TF_binding_site|BDTNP1_TFBS_dl|FBsf0000306585);(TF_binding_site|BDTNP1_TFBS_Med|FBsf0000282658);(TF_binding_site|BDTNP1_TFBS_twi|FBsf0000203361);(TF_binding_site|mE1_TFBS_cad|FBsf0000244641)
18	1	3R_12792274_SNP	FBgn0000015	Abd-B	INTRON	0	A	G	G	0.25	10	30	2.102	2.19992e-07	(TF_binding_site|mE1_TFBS_cad|FBsf0000248599)
18	2	2L_5103685_SNP	FBgn0261836	Msp300	INTRON	0	C	T	C	0.3	12	28	1.095	2.07502e-07	-
18	2	2L_5103687_SNP	FBgn0261836	Msp300	INTRON	0	T	G	T	0.3	12	28	1.095	2.07502e-07	-
18	2	3L_9725234_SNP	FBgn0036040	CG6749	SYNONYMOUS_CODING	0	G	A	A	0.3846	15	24	1.018	6.12504e-07	(TF_binding_site|mE1_TFBS_cad|FBsf0000244623);(TF_binding_site|mE1_TFBS_HSA|FBsf0000363743)
18	2	3L_9725234_SNP	FBgn0019644	ATPsyn-b	DOWNSTREAM	910	G	A	A	0.3846	15	24	1.018	6.12504e-07	(TF_binding_site|mE1_TFBS_cad|FBsf0000244623);(TF_binding_site|mE1_TFBS_HSA|FBsf0000363743)
18	2	X_8751194_SNP	FBgn0030065	CG12075	INTRON	0	G	A	A	0.1892	7	30	1.294	6.89795e-07	-
18	3	2L_11940850_SNP	Intergenic	Intergenic			T	C	C	0.2368	9	29	0.9681	1.06964e-06	-
18	3	3R_15808805_SNP	FBgn0038755	Hs6st	INTRON	0	T	G	T	0.2162	8	29	1.028	3.85521e-07	-
18	3	3R_15808815_SNP	FBgn0038755	Hs6st	INTRON	0	T	A	T	0.2051	8	31	1.013	5.03588e-07	-
18	3	3R_15808818_SNP	FBgn0038755	Hs6st	INTRON	0	C	T	C	0.2051	8	31	1.013	5.03588e-07	-
18	3	3R_15825930_SNP	FBgn0038755	Hs6st	INTRON	0	A	G	G	0.3	12	28	0.9207	3.03488e-07	-
18	3	3R_18526407_SNP	FBgn0039007	CCAP	UTR_3_PRIME	0	G	C	C	0.4211	16	22	-0.9246	1.44232e-08	-
18	3	3R_18526407_SNP	FBgn0039006	Cyp6d4	DOWNSTREAM	378	G	C	C	0.4211	16	22	-0.9246	1.44232e-08	-
18	3	3R_8624938_SNP	Intergenic	Intergenic			T	A	A	0.4054	15	22	0.8779	1.69416e-06	-
18	4	3R_3425935_SNP	FBgn0083963	CG34127	INTRON	0	A	C	C	0.15	6	34	0.9999	7.54391e-07	-
18	6	3R_24462154_SNP	FBgn0039591	CG9988	NON_SYNONYMOUS_CODING	0	A	C	C	0.359	14	25	-0.6982	1.02392e-06	(TF_binding_site|mE1_TFBS_cad|FBsf0000249445)
18	8	2R_11044016_SNP	FBgn0013467	igl	INTRON	0	C	G	G	0.175	7	33	0.7085	1.74228e-06	-
18	8	2R_11044099_SNP	FBgn0013467	igl	INTRON	0	C	G	G	0.1842	7	31	0.7162	1.46709e-06	-
18	8	2R_11044180_SNP	FBgn0013467	igl	INTRON	0	C	T	T	0.175	7	33	0.7085	1.74228e-06	-
18	8	2R_11044182_SNP	FBgn0013467	igl	INTRON	0	T	A	A	0.175	7	33	0.7085	1.74228e-06	-
18	8	2R_11044491_SNP	FBgn0013467	igl	INTRON	0	T	G	G	0.1795	7	32	0.706	2.13364e-06	-
18	8	X_3185920_SNP	FBgn0000479	dnc	INTRON	0	A	C	C	0.25	10	30	0.6273	1.08322e-06	-
18	8	X_3186095_SNP	FBgn0000479	dnc	INTRON	0	G	A	A	0.25	10	30	0.6273	1.08322e-06	(TF_binding_site|BDTNP1_TFBS_dl|FBsf0000316254)
18	9	2R_11915567_SNP	FBgn0034068	casp	INTRON	0	T	C	C	0.1622	6	31	-0.7141	1.34443e-06	(TF_binding_site|BDTNP1_TFBS_dl|FBsf0000302504);(TF_binding_site|mE1_TFBS_HSA|FBsf0000357283)
18	9	2R_11915567_SNP	FBgn0034069	CG8401	UPSTREAM	541	T	C	C	0.1622	6	31	-0.7141	1.34443e-06	(TF_binding_site|BDTNP1_TFBS_dl|FBsf0000302504);(TF_binding_site|mE1_TFBS_HSA|FBsf0000357283)
18	10	2L_18569152_SNP	FBgn0085370	Pde11	INTRON	0	G	C	C	0.2821	11	28	-0.5792	7.47515e-07	-
19	1	2L_10051234_SNP	FBgn0053301	CG33301	DOWNSTREAM	33	T	A	T	0.15	6	34	-3.905	1.30984e-06	-
19	1	2L_10051234_SNP	FBgn0266168	CR44874	UPSTREAM	128	T	A	T	0.15	6	34	-3.905	1.30984e-06	-
19	1	2L_10051242_SNP	FBgn0053301	CG33301	DOWNSTREAM	41	T	C	T	0.1538	6	33	-3.924	1.19665e-06	-
19	1	2L_10051242_SNP	FBgn0266168	CR44874	UPSTREAM	120	T	C	T	0.1538	6	33	-3.924	1.19665e-06	-
19	1	2L_10051263_SNP	FBgn0053301	CG33301	DOWNSTREAM	62	T	C	T	0.15	6	34	-3.905	1.30984e-06	-
19	1	2L_10051263_SNP	FBgn0266168	CR44874	UPSTREAM	99	T	C	T	0.15	6	34	-3.905	1.30984e-06	-
19	1	2R_13789418_SNP	FBgn0011589	Elk	INTRON	0	G	A	A	0.125	5	35	-4.362	3.81275e-07	-
19	1	2R_15985567_SNP	Intergenic	Intergenic			G	C	C	0.2	8	32	-3.474	1.45914e-06	(enhancer|mE1_CBP_Enhancers|FBsf0000343787);(TF_binding_site|mE1_TFBS_HSA|FBsf0000358610)
19	1	2R_15986083_SNP	Intergenic	Intergenic			C	A	A	0.2308	9	30	-3.311	1.95363e-06	(enhancer|mE1_CBP_Enhancers|FBsf0000343787);(TF_binding_site|BDTNP1_TFBS_da|FBsf0000324858);(TF_binding_site|BDTNP1_TFBS_twi|FBsf0000199909);(TF_binding_site|mE1_TFBS_disco|FBsf0000259892);(TF_binding_site|mE1_TFBS_HSA|FBsf0000358610);(TF_binding_site|mE1_TFBS_sens|FBsf0000228995)
19	1	2R_20031024_SNP	FBgn0019643	Dat	INTRON	0	A	C	C	0.1316	5	33	-4.251	1.11626e-06	-
19	1	3L_18828947_SNP	FBgn0036816	Indy	INTRON	0	A	T	T	0.2895	11	27	-3.121	1.30383e-06	-
19	1	3L_9647839_SNP	FBgn0053696	CG33696	INTRON	0	A	T	A	0.2632	10	28	-3.318	6.20718e-07	-
19	1	3L_9647839_SNP	FBgn0016081	fry	INTRON	0	A	T	A	0.2632	10	28	-3.318	6.20718e-07	-
19	2	2L_9679530_SNP	Intergenic	Intergenic			A	T	T	0.175	7	33	2.129	2.84532e-07	-
19	2	2L_9679532_INS	Intergenic	Intergenic			CCT	A	A	0.175	7	33	2.129	2.84532e-07	-
19	2	2L_9679534_SNP	Intergenic	Intergenic			T	A	A	0.175	7	33	2.129	2.84532e-07	-
19	2	2L_9679535_SNP	Intergenic	Intergenic			T	G	G	0.1579	6	32	2.286	2.0798e-07	-
19	2	2L_9679537_SNP	Intergenic	Intergenic			T	A	A	0.175	7	33	2.129	2.84532e-07	-
19	2	2L_9679540_SNP	Intergenic	Intergenic			T	G	G	0.1795	7	32	2.088	6.62419e-07	-
19	2	2L_9679542_SNP	Intergenic	Intergenic			G	T	T	0.1795	7	32	2.112	4.29594e-07	-
19	2	2L_9679543_SNP	Intergenic	Intergenic			A	C	C	0.175	7	33	2.129	2.84532e-07	-
19	2	2L_9679546_INS	Intergenic	Intergenic			CCCTA	C	C	0.1795	7	32	2.112	4.29594e-07	-
19	2	2L_9679550_SNP	Intergenic	Intergenic			T	A	A	0.1795	7	32	2.112	4.29594e-07	-
19	2	2R_15202118_SNP	FBgn0264753	Rgk1	SYNONYMOUS_CODING	0	G	A	A	0.15	6	34	2.185	1.00873e-06	-
19	2	X_8127279_SNP	FBgn0261873	sdt	INTRON	0	A	G	G	0.2564	10	29	1.788	1.37116e-06	(TF_binding_site|BDTNP1_TFBS_dl|FBsf0000317609);(TF_binding_site|mE1_TFBS_bab1|FBsf0000214990);(TF_binding_site|mE1_TFBS_HSA|FBsf0000380536)
19	2	X_8435183_INS	FBgn0264975	Nrg	INTRON	0	A	AGAA	A	0.3889	14	22	1.787	1.65166e-07	-
19	3	2L_15288267_SNP	Intergenic	Intergenic			A	T	T	0.2051	8	31	1.685	1.66609e-06	-
19	3	3L_8822071_SNP	FBgn0263930	dally	INTRON	0	T	C	C	0.2162	8	29	1.684	2.13341e-06	(TF_binding_site|BDTNP1_TFBS_da|FBsf0000326429);(TF_binding_site|BDTNP1_TFBS_dl|FBsf0000306348);(TF_binding_site|BDTNP1_TFBS_gt|FBsf0000293869);(TF_binding_site|BDTNP1_TFBS_Med|FBsf0000282540);(TF_binding_site|BDTNP1_TFBS_prd|FBsf0000275471);(TF_binding_site|BDTNP1_TFBS_slp1|FBsf0000272511);(TF_binding_site|BDTNP1_TFBS_sna|FBsf0000269235);(TF_binding_site|BDTNP1_TFBS_tll|FBsf0000266964);(TF_bindi…
19	4	2L_10795333_SNP	FBgn0051869	CG31869	INTRON	0	A	T	T	0.1579	6	32	1.614	1.48033e-06	(TF_binding_site|mE1_TFBS_HSA|FBsf0000347513);(TF_binding_site|mE1_TFBS_inv|FBsf0000234849)
19	4	2L_1671831_SNP	FBgn0086758	chinmo	INTRON	0	T	C	C	0.225	9	31	1.383	1.16655e-06	-
19	4	2R_6543624_SNP	FBgn0265645	CR44452	DOWNSTREAM	576	C	T	T	0.125	5	35	1.739	1.35843e-06	-
19	4	2R_6543627_SNP	FBgn0265645	CR44452	DOWNSTREAM	573	C	T	T	0.125	5	35	1.739	1.35843e-06	-
19	4	2R_6543629_INS	FBgn0265645	CR44452	DOWNSTREAM	570	GGTCTGTTGTTG	G	G	0.125	5	35	1.739	1.35843e-06	-
19	4	2R_793067_SNP	FBgn0264911	CG44102	INTRON	0	G	A	A	0.1579	6	32	1.659	5.62763e-07	-
19	4	3L_13878406_SNP	FBgn0264006	dysc	DOWNSTREAM	420	A	C	C	0.125	5	35	1.733	1.50623e-06	(TF_binding_site|BDTNP1_TFBS_dl|FBsf0000307300);(TF_binding_site|mE1_TFBS_HSA|FBsf0000364993)
19	4	3L_13878485_SNP	FBgn0264006	dysc	DOWNSTREAM	341	T	G	G	0.1389	5	31	1.762	1.14137e-06	(TF_binding_site|BDTNP1_TFBS_dl|FBsf0000307300);(TF_binding_site|mE1_TFBS_HSA|FBsf0000364993)
19	4	X_6523606_SNP	FBgn0029881	pigs	INTRON	0	T	C	C	0.1316	5	33	1.76	1.00931e-06	-
19	5	2L_7200153_SNP	FBgn0031896	CG4502	INTRON	0	A	G	G	0.2564	10	29	1.307	7.94469e-07	(TF_binding_site|BDTNP1_TFBS_dl|FBsf0000297233);(TF_binding_site|mE1_TFBS_HSA|FBsf0000346348)
19	6	2L_5457394_SNP	Intergenic	Intergenic			T	A	A	0.2564	10	29	1.222	7.4465e-07	(TF_binding_site|BDTNP1_TFBS_da|FBsf0000321517);(TF_binding_site|BDTNP1_TFBS_hb|FBsf0000290591);(TF_binding_site|BDTNP1_TFBS_Med|FBsf0000277641);(TF_binding_site|BDTNP1_TFBS_slp1|FBsf0000271697)
19	6	X_4839371_DEL	FBgn0004368	Ptp4E	INTRON	0	G	GG	GG	0.1053	4	34	1.744	1.07109e-06	-
19	7	3L_4342395_SNP	FBgn0035533	Cip4	INTRON	0	G	A	A	0.2308	9	30	-1.03	1.67175e-06	-
19	7	X_18214571_SNP	FBgn0030912	CG6023	INTRON	0	T	G	T	0.3939	13	20	-0.9667	1.59959e-06	-
19	8	3L_13246082_SNP	FBgn0023095	caps	INTRON	0	A	G	G	0.2	8	32	1.051	2.77421e-07	-
19	8	3L_13712878_SNP	FBgn0264001	bru-3	INTRON	0	T	C	C	0.2	8	32	1.043	3.85765e-07	-
19	8	3L_20849419_SNP	FBgn0052432	CG32432	INTRON	0	G	T	G	0.3421	13	25	0.9801	3.73985e-08	-
19	8	3R_20715597_SNP	FBgn0051121	CG31121	INTRON	0	T	A	T	0.4474	17	21	0.8575	1.09949e-06	-
19	8	3R_20842935_SNP	FBgn0039257	tnc	NON_SYNONYMOUS_CODING	0	A	G	A	0.2368	9	29	0.9548	1.75099e-06	-
19	8	3R_24673658_SNP	FBgn0264324	spg	INTRON	0	C	T	T	0.1842	7	31	1.081	1.48349e-06	-
19	8	3R_24770933_SNP	FBgn0039617	CG14521	INTRON	0	T	A	A	0.3243	12	25	0.9388	5.98793e-07	-
19	9	2L_4365252_SNP	FBgn0026319	Traf4	INTRON	0	A	T	T	0.2	8	32	-1.06	2.26077e-07	(TF_binding_site|BDTNP1_TFBS_da|FBsf0000321396);(TF_binding_site|BDTNP1_TFBS_Med|FBsf0000277512);(TF_binding_site|BDTNP1_TFBS_twi|FBsf0000200806);(TF_binding_site|mE1_TFBS_cad|FBsf0000241312);(TF_binding_site|mE1_TFBS_Kr|FBsf0000253184)
19	9	2L_4365252_SNP	FBgn0266903	CR45363	UPSTREAM	1000	A	T	T	0.2	8	32	-1.06	2.26077e-07	(TF_binding_site|BDTNP1_TFBS_da|FBsf0000321396);(TF_binding_site|BDTNP1_TFBS_Med|FBsf0000277512);(TF_binding_site|BDTNP1_TFBS_twi|FBsf0000200806);(TF_binding_site|mE1_TFBS_cad|FBsf0000241312);(TF_binding_site|mE1_TFBS_Kr|FBsf0000253184)
19	9	2L_7364442_SNP	FBgn0031903	Wnt10	INTRON	0	T	A	A	0.2222	8	28	-1.025	1.54875e-06	-
19	9	3L_10837525_SNP	Intergenic	Intergenic			T	A	A	0.4167	15	21	0.8373	1.09989e-06	(TF_binding_site|BDTNP1_TFBS_da|FBsf0000326595);(TF_binding_site|BDTNP1_TFBS_dl|FBsf0000306726);(TF_binding_site|mE1_TFBS_HSA|FBsf0000364020)
19	9	3R_17669673_SNP	FBgn0045469	Gr93c	DOWNSTREAM	63	T	A	A	0.2564	10	29	-0.9484	1.47101e-06	-
19	9	3R_17669673_SNP	FBgn0045470	Gr93b	UPSTREAM	186	T	A	A	0.2564	10	29	-0.9484	1.47101e-06	-
19	10	2L_18956169_SNP	FBgn0032727	CG10623	SYNONYMOUS_CODING	0	T	G	G	0.35	14	26	-0.8005	1.76291e-06	-
19	10	2R_8514345_SNP	FBgn0033756	CG17760	SYNONYMOUS_CODING	0	T	C	T	0.4103	16	23	-0.8164	4.30954e-07	-
19	10	2R_8515514_SNP	FBgn0033756	CG17760	SYNONYMOUS_CODING	0	A	C	A	0.4054	15	22	0.8828	4.49734e-08	-
19	10	2R_8515514_SNP	FBgn0033757	muskelin	DOWNSTREAM	688	A	C	A	0.4054	15	22	0.8828	4.49734e-08	-
19	10	2R_8519153_SNP	FBgn0033757	muskelin	INTRON	0	A	G	A	0.359	14	25	-0.8279	5.82758e-07	(TF_binding_site|BDTNP1_TFBS_dl|FBsf0000301684);(TF_binding_site|mE1_TFBS_sens|FBsf0000227644)
19	10	3L_9636279_SNP	FBgn0016081	fry	INTRON	0	A	G	G	0.4737	18	20	-0.7858	1.85821e-06	-
19	10	3L_9636279_SNP	FBgn0053696	CG33696	UPSTREAM	930	A	G	G	0.4737	18	20	-0.7858	1.85821e-06	-
19	10	X_16671741_SNP	FBgn0001250	if	INTRON	0	C	T	C	0.4474	17	21	-0.7784	1.58529e-06	(TF_binding_site|BDTNP1_TFBS_dl|FBsf0000319650)
19	11	2R_17018973_SNP	FBgn0034590	Magi	SYNONYMOUS_CODING	0	G	A	A	0.1282	5	34	1.135	6.05441e-07	(TF_binding_site|mE1_TFBS_chinmo|FBsf0000211693);(TF_binding_site|mE1_TFBS_HSA|FBsf0000358961)
19	11	2R_17596563_SNP	FBgn0004362	HmgD	INTRON	0	C	T	T	0.175	7	33	0.9812	7.56763e-07	(TF_binding_site|BDTNP1_TFBS_dl|FBsf0000303792);(TF_binding_site|BDTNP1_TFBS_Med|FBsf0000281207);(TF_binding_site|mE1_TFBS_HSA|FBsf0000359180);(TF_binding_site|mE1_TFBS_Trl|FBsf0000339058)
19	11	2R_17596563_SNP	FBgn0265962	CR44749	EXON	0	C	T	T	0.175	7	33	0.9812	7.56763e-07	(TF_binding_site|BDTNP1_TFBS_dl|FBsf0000303792);(TF_binding_site|BDTNP1_TFBS_Med|FBsf0000281207);(TF_binding_site|mE1_TFBS_HSA|FBsf0000359180);(TF_binding_site|mE1_TFBS_Trl|FBsf0000339058)
19	11	2R_17596563_SNP	FBgn0050403	CG30403	DOWNSTREAM	837	C	T	T	0.175	7	33	0.9812	7.56763e-07	(TF_binding_site|BDTNP1_TFBS_dl|FBsf0000303792);(TF_binding_site|BDTNP1_TFBS_Med|FBsf0000281207);(TF_binding_site|mE1_TFBS_HSA|FBsf0000359180);(TF_binding_site|mE1_TFBS_Trl|FBsf0000339058)
19	11	3R_19283678_SNP	FBgn0039078	CG4374	INTRON	0	A	C	C	0.3824	13	21	0.807	1.95978e-06	(TF_binding_site|mE1_TFBS_chinmo|FBsf0000213193)
19	11	3R_8122159_SNP	FBgn0003651	svp	DOWNSTREAM	299	G	A	A	0.5	17	17	0.8787	1.8852e-08	-
19	13	2L_14734915_SNP	FBgn0051835	CG31835	UPSTREAM	928	G	A	A	0.3333	12	24	0.714	1.6285e-06	-
19	14	2R_14891270_DEL	FBgn0265356	tn	DOWNSTREAM	741	GG	G	GG	0.2778	10	26	-0.7501	1.1778e-06	-
19	15	3L_10860154_SNP	FBgn0026160	tna	INTRON	0	G	T	T	0.3611	13	23	0.6654	5.7149e-07	(TF_binding_site|mE1_TFBS_HSA|FBsf0000364035)
19	15	3L_10863995_SNP	FBgn0026160	tna	INTRON	0	G	A	A	0.3846	15	24	0.6083	1.93539e-06	(TF_binding_site|mE1_TFBS_cad|FBsf0000244694);(TF_binding_site|mE1_TFBS_chinmo|FBsf0000210063)
19	15	3L_10865436_SNP	FBgn0026160	tna	INTRON	0	A	T	T	0.2051	8	31	0.7472	1.09379e-06	(TF_binding_site|mE1_TFBS_cad|FBsf0000244695);(TF_binding_site|mE1_TFBS_chinmo|FBsf0000210063)
19	15	3L_10865714_SNP	FBgn0026160	tna	SYNONYMOUS_CODING	0	C	T	T	0.2	8	32	0.733	1.91074e-06	(TF_binding_site|BDTNP1_TFBS_sna|FBsf0000269299);(TF_binding_site|mE1_TFBS_cad|FBsf0000244695);(TF_binding_site|mE1_TFBS_HSA|FBsf0000364038)
19	15	3L_10865717_SNP	FBgn0026160	tna	SYNONYMOUS_CODING	0	T	C	C	0.2	8	32	0.733	1.91074e-06	(TF_binding_site|BDTNP1_TFBS_sna|FBsf0000269299);(TF_binding_site|mE1_TFBS_cad|FBsf0000244695);(TF_binding_site|mE1_TFBS_HSA|FBsf0000364038)
19	15	3L_881262_SNP	FBgn0052479	CG32479	INTRON	0	T	G	G	0.3	12	28	0.6418	1.70574e-06	(TF_binding_site|BDTNP1_TFBS_dl|FBsf0000304886);(TF_binding_site|mE1_TFBS_sens|FBsf0000222317);(TF_binding_site|mE1_TFBS_Trl|FBsf0000339320)
19	15	3L_881262_SNP	FBgn0035173	CG13907	UPSTREAM	217	T	G	G	0.3	12	28	0.6418	1.70574e-06	(TF_binding_site|BDTNP1_TFBS_dl|FBsf0000304886);(TF_binding_site|mE1_TFBS_sens|FBsf0000222317);(TF_binding_site|mE1_TFBS_Trl|FBsf0000339320)
19	16	2L_2602569_SNP	FBgn0266024	CR44789	UPSTREAM	848	C	T	C	0.2105	8	30	0.682	1.96328e-06	-
19	16	2R_12516230_SNP	FBgn0040505	Alk	UTR_3_PRIME	0	A	C	A	0.2051	8	31	0.6617	2.08224e-06	-
19	16	3L_5482505_SNP	Intergenic	Intergenic			G	A	G	0.4872	19	20	-0.5446	1.45337e-06	-
19	16	X_10326197_INS	FBgn0052683	CG32683	INTRON	0	CTGTTG	C	C	0.2821	11	28	0.6214	8.22574e-07	-
19	16	X_10326197_INS	FBgn0030202	CG12640	DOWNSTREAM	300	CTGTTG	C	C	0.2821	11	28	0.6214	8.22574e-07	-
19	16	X_10326226_SNP	FBgn0052683	CG32683	INTRON	0	T	C	C	0.275	11	29	0.6138	1.1089e-06	-
19	16	X_10326226_SNP	FBgn0030202	CG12640	DOWNSTREAM	272	T	C	C	0.275	11	29	0.6138	1.1089e-06	-
19	16	X_10326282_INS	FBgn0052683	CG32683	INTRON	0	AT	A	A	0.275	11	29	0.6138	1.1089e-06	-
19	16	X_10326282_INS	FBgn0030202	CG12640	DOWNSTREAM	215	AT	A	A	0.275	11	29	0.6138	1.1089e-06	-
19	16	X_17327660_SNP	FBgn0040877	CG12994	INTRON	0	T	C	C	0.3158	12	26	0.6394	1.96337e-07	-
19	17	2L_8069480_SNP	FBgn0011230	poe	SYNONYMOUS_CODING	0	T	G	G	0.2632	10	28	0.5645	1.94982e-06	(TF_binding_site|mE1_TFBS_HSA|FBsf0000346628);(TF_binding_site|mE1_TFBS_sens|FBsf0000216725)
20	1	2L_12188039_DEL	FBgn0000114	aret	INTRON	0	A	AA	AA	0.1282	5	34	2.325	7.21841e-07	-
20	1	2L_2605791_SNP	Intergenic	Intergenic			C	T	T	0.1316	5	33	2.25	1.95408e-06	-
20	1	3L_6285564_SNP	Intergenic	Intergenic			G	A	A	0.2105	8	30	2.011	1.86301e-07	-
20	1	3L_6285573_INS	Intergenic	Intergenic			AGGCTCGTGATTTTGACACATTTCCAGGTA	A	A	0.1842	7	31	2.059	5.34161e-07	-
20	1	3L_6285587_SNP	Intergenic	Intergenic			G	A	A	0.1795	7	32	2.006	1.23955e-06	-
20	1	3L_6285590_SNP	Intergenic	Intergenic			C	T	T	0.2105	8	30	2.011	1.86301e-07	-
20	1	3R_13651042_SNP	FBgn0261649	tinc	INTRON	0	C	A	A	0.2703	10	27	1.764	1.32427e-06	(TF_binding_site|BDTNP1_TFBS_da|FBsf0000329683);(TF_binding_site|BDTNP1_TFBS_dl|FBsf0000312507);(TF_binding_site|BDTNP1_TFBS_Med|FBsf0000285770);(TF_binding_site|BDTNP1_TFBS_sna|FBsf0000271115);(TF_binding_site|BDTNP1_TFBS_twi|FBsf0000265353)
20	1	3R_25335643_SNP	Intergenic	Intergenic			G	C	G	0.5	19	19	-1.555	1.43019e-06	-
20	1	3R_4953494_SNP	FBgn0003165	pum	INTRON	0	A	G	G	0.1579	6	32	2.133	9.0295e-07	(TF_binding_site|BDTNP1_TFBS_dl|FBsf0000310599);(TF_binding_site|BDTNP1_TFBS_twi|FBsf0000264536);(TF_binding_site|mE1_TFBS_cad|FBsf0000247960);(TF_binding_site|mE1_TFBS_HSA|FBsf0000369817)
20	2	2L_10916170_SNP	FBgn0261871	dpr2	DOWNSTREAM	845	A	G	G	0.1	4	36	-1.764	4.04698e-07	-
20	2	2L_15996821_SNP	Intergenic	Intergenic			A	G	G	0.1429	5	30	-1.692	1.54438e-06	-
20	2	2L_15996824_DEL	Intergenic	Intergenic			A	GTTAAAATCAT	GTTAAAATCAT	0.1429	5	30	-1.692	1.54438e-06	-
20	2	2L_16163894_SNP	Intergenic	Intergenic			G	A	G	0.2105	8	30	-1.429	1.99172e-07	-
20	2	2L_16163897_SNP	Intergenic	Intergenic			G	C	G	0.2162	8	29	-1.432	2.19957e-07	-
20	2	2L_16164052_DEL	Intergenic	Intergenic			A	AAAG	AAAG	0.2059	7	27	-1.485	9.75602e-07	-
20	2	2L_16169024_SNP	FBgn0001991	Ca-alpha1D	INTRON	0	A	G	G	0.15	6	34	-1.658	3.00423e-08	-
20	2	2L_17852963_DEL	FBgn0262018	CadN2	INTRON	0	T	TGCAGA	TGCAGA	0.1389	5	31	-1.773	1.00881e-07	-
20	2	2L_17885898_SNP	Intergenic	Intergenic			C	A	A	0.1795	7	32	-1.446	1.36744e-06	(TF_binding_site|mE1_TFBS_chinmo|FBsf0000207768)
20	2	2L_17927341_SNP	Intergenic	Intergenic			T	C	C	0.15	6	34	-1.559	6.91955e-07	-
20	2	2L_17960629_SNP	Intergenic	Intergenic			A	G	G	0.1795	7	32	-1.446	1.36744e-06	-
20	2	2L_18000892_SNP	Intergenic	Intergenic			T	A	A	0.1795	7	32	-1.446	1.36744e-06	-
20	2	2L_18014758_SNP	FBgn0243486	rdo	INTRON	0	C	G	G	0.1892	7	30	-1.465	1.04039e-06	(regulatory_region|REDfly_CRMs|FBsf0000436785)
20	2	2L_18025934_SNP	FBgn0243486	rdo	INTRON	0	G	A	A	0.15	6	34	-1.559	6.91955e-07	-
20	2	2L_18026645_SNP	FBgn0243486	rdo	INTRON	0	C	G	G	0.15	6	34	-1.559	6.91955e-07	-
20	2	2L_18027423_SNP	FBgn0243486	rdo	INTRON	0	G	T	T	0.1538	6	33	-1.567	6.10895e-07	-
20	2	2L_18028048_SNP	FBgn0243486	rdo	INTRON	0	A	C	C	0.15	6	34	-1.559	6.91955e-07	-
20	2	2L_18028420_SNP	FBgn0243486	rdo	INTRON	0	A	T	T	0.15	6	34	-1.559	6.91955e-07	-
20	2	2L_18028421_SNP	FBgn0243486	rdo	INTRON	0	A	C	C	0.15	6	34	-1.559	6.91955e-07	-
20	2	2L_18028441_SNP	FBgn0243486	rdo	INTRON	0	A	T	T	0.15	6	34	-1.559	6.91955e-07	-
20	2	2L_18049901_SNP	FBgn0243486	rdo	INTRON	0	A	G	G	0.1538	6	33	-1.565	6.15563e-07	-
20	2	2L_18073011_SNP	Intergenic	Intergenic			A	C	C	0.15	6	34	-1.559	6.91955e-07	-
20	2	2L_18078329_DEL	FBgn0000120	Arr1	UPSTREAM	319	T	TTAAAGGCACATCCAAAGTTTAAACTATTTCCGC	TTAAAGGCACATCCAAAGTTTAAACTATTTCCGC	0.1538	6	33	-1.546	9.8366e-07	-
20	2	2L_18107835_DEL	Intergenic	Intergenic			A	ATCTGGATGTTCCGAAAGAAAGCTTATATGTA	ATCTGGATGTTCCGAAAGAAAGCTTATATGTA	0.1538	6	33	-1.546	9.8366e-07	-
20	2	2L_18404396_SNP	FBgn0265680	CR44487	EXON	0	A	G	G	0.1026	4	35	-1.812	1.45476e-07	-
20	2	2L_18404488_SNP	FBgn0265680	CR44487	EXON	0	G	A	A	0.1026	4	35	-1.812	1.45476e-07	-
20	2	2L_18404931_SNP	FBgn0265680	CR44487	DOWNSTREAM	331	A	G	G	0.1316	5	33	-1.761	1.24079e-07	-
20	2	2L_18414499_SNP	Intergenic	Intergenic			A	G	G	0.125	5	35	-1.795	2.97037e-08	-
20	2	2L_18470999_SNP	FBgn0263049	let-7-C	EXON	0	G	A	A	0.1765	6	28	-1.561	1.51601e-06	-
20	2	2L_18470999_SNP	FBgn0262463	mir-100	UPSTREAM	435	G	A	A	0.1765	6	28	-1.561	1.51601e-06	-
20	2	2L_18482129_SNP	FBgn0032681	CG10283	INTRON	0	T	C	C	0.1282	5	34	-1.79	4.02736e-08	(TF_binding_site|BDTNP1_TFBS_da|FBsf0000322772)
20	2	2L_18487452_SNP	FBgn0032682	CG10176	UTR_3_PRIME	0	C	T	T	0.2	7	28	-1.518	3.1053e-07	(TF_binding_site|BDTNP1_TFBS_da|FBsf0000322777);(TF_binding_site|BDTNP1_TFBS_dl|FBsf0000299189);(TF_binding_site|BDTNP1_TFBS_ftz|FBsf0000295131);(TF_binding_site|BDTNP1_TFBS_gt|FBsf0000293285);(TF_binding_site|BDTNP1_TFBS_Med|FBsf0000278847);(TF_binding_site|BDTNP1_TFBS_sna|FBsf0000268803);(TF_binding_site|BDTNP1_TFBS_twi|FBsf0000202020);(TF_binding_site|mE1_TFBS_cad|FBsf0000242330);(TF_binding_s…
20	2	2L_18487452_SNP	FBgn0032683	kon	DOWNSTREAM	295	C	T	T	0.2	7	28	-1.518	3.1053e-07	(TF_binding_site|BDTNP1_TFBS_da|FBsf0000322777);(TF_binding_site|BDTNP1_TFBS_dl|FBsf0000299189);(TF_binding_site|BDTNP1_TFBS_ftz|FBsf0000295131);(TF_binding_site|BDTNP1_TFBS_gt|FBsf0000293285);(TF_binding_site|BDTNP1_TFBS_Med|FBsf0000278847);(TF_binding_site|BDTNP1_TFBS_sna|FBsf0000268803);(TF_binding_site|BDTNP1_TFBS_twi|FBsf0000202020);(TF_binding_site|mE1_TFBS_cad|FBsf0000242330);(TF_binding_s…
20	2	2L_18498143_SNP	FBgn0032683	kon	INTRON	0	A	G	G	0.1892	7	30	-1.459	1.55202e-06	-
20	2	2L_3831799_SNP	Intergenic	Intergenic			C	T	C	0.1	4	36	-1.767	3.84089e-07	(regulatory_region|REDfly_CRMs|FBsf0000435558);(regulatory_region|REDfly_CRMs|FBsf0000436349);(silencer|mE1_HDAC_PRE|FBsf0000343345)
20	2	2L_647925_DEL	FBgn0000497	ds	INTRON	0	A	AAGCCA	AAGCCA	0.1053	4	34	-1.722	1.09019e-06	-
20	2	2L_8222290_SNP	FBgn0032006	Pvr	SYNONYMOUS_CODING	0	G	T	T	0.1026	4	35	-1.765	4.23148e-07	-
20	2	2R_18437405_SNP	FBgn0003175	px	INTRON	0	T	G	G	0.2	8	32	-1.353	1.83349e-06	-
20	2	2R_18437405_SNP	FBgn0034736	CG6018	UPSTREAM	194	T	G	G	0.2	8	32	-1.353	1.83349e-06	-
20	2	2R_19683998_SNP	FBgn0034903	CG9850	INTRON	0	C	T	T	0.1	4	36	-1.761	4.38572e-07	(TF_binding_site|mE1_TFBS_HSA|FBsf0000359928)
20	2	2R_19684229_SNP	FBgn0034903	CG9850	INTRON	0	C	A	A	0.1	4	36	-1.761	4.38572e-07	(TF_binding_site|mE1_TFBS_HSA|FBsf0000359928)
20	2	2R_8494571_SNP	FBgn0027356	Amph	INTRON	0	T	C	C	0.15	6	34	-1.536	1.24573e-06	-
20	2	2R_8706566_SNP	Intergenic	Intergenic			T	G	G	0.2368	9	29	-1.435	1.25463e-08	-
20	2	2R_8706868_SNP	Intergenic	Intergenic			G	A	A	0.2051	8	31	-1.408	4.45312e-07	-
20	2	2R_9738483_SNP	FBgn0050485	CG30485	NON_SYNONYMOUS_CODING	0	G	A	A	0.125	5	35	-1.795	2.97037e-08	-
20	2	2R_9738487_SNP	FBgn0050485	CG30485	NON_SYNONYMOUS_CODING	0	A	C	C	0.125	5	35	-1.795	2.97037e-08	-
20	2	2R_9781029_SNP	FBgn0013733	shot	INTRON	0	A	T	T	0.1026	4	35	-1.812	1.45476e-07	(TF_binding_site|mE1_TFBS_cad|FBsf0000246594);(TF_binding_site|mE1_TFBS_HSA|FBsf0000356500)
20	2	2R_9781329_SNP	FBgn0013733	shot	INTRON	0	C	G	G	0.125	5	35	-1.795	2.97037e-08	(TF_binding_site|mE1_TFBS_cad|FBsf0000246594);(TF_binding_site|mE1_TFBS_chinmo|FBsf0000211261);(TF_binding_site|mE1_TFBS_HSA|FBsf0000356500)
20	2	2R_9784017_SNP	FBgn0013733	shot	INTRON	0	T	C	C	0.15	6	34	-1.592	3.38515e-07	-
20	2	2R_9784053_SNP	FBgn0013733	shot	INTRON	0	C	T	T	0.15	6	34	-1.592	3.38515e-07	-
20	2	2R_9823455_SNP	FBgn0013733	shot	INTRON	0	C	T	T	0.125	5	35	-1.795	2.97037e-08	(TF_binding_site|BDTNP1_TFBS_da|FBsf0000324168);(TF_binding_site|BDTNP1_TFBS_dl|FBsf0000301984);(TF_binding_site|BDTNP1_TFBS_Med|FBsf0000280262);(TF_binding_site|BDTNP1_TFBS_twi|FBsf0000199305);(TF_binding_site|mE1_TFBS_bab1|FBsf0000214249);(TF_binding_site|mE1_TFBS_cad|FBsf0000246599);(TF_binding_site|mE1_TFBS_HSA|FBsf0000356514);(TF_binding_site|mE1_TFBS_Trl|FBsf0000338565)
20	2	2R_9823674_SNP	FBgn0013733	shot	INTRON	0	A	T	T	0.125	5	35	-1.795	2.97037e-08	(TF_binding_site|BDTNP1_TFBS_da|FBsf0000324168);(TF_binding_site|BDTNP1_TFBS_dl|FBsf0000301984);(TF_binding_site|BDTNP1_TFBS_Med|FBsf0000280262);(TF_binding_site|BDTNP1_TFBS_twi|FBsf0000199305);(TF_binding_site|mE1_TFBS_bab1|FBsf0000214249);(TF_binding_site|mE1_TFBS_cad|FBsf0000246599);(TF_binding_site|mE1_TFBS_HSA|FBsf0000356514)
20	2	2R_9823696_SNP	FBgn0013733	shot	INTRON	0	C	T	T	0.1282	5	34	-1.809	1.98874e-08	(TF_binding_site|BDTNP1_TFBS_da|FBsf0000324168);(TF_binding_site|BDTNP1_TFBS_dl|FBsf0000301984);(TF_binding_site|BDTNP1_TFBS_Med|FBsf0000280262);(TF_binding_site|BDTNP1_TFBS_twi|FBsf0000199305);(TF_binding_site|mE1_TFBS_bab1|FBsf0000214249);(TF_binding_site|mE1_TFBS_cad|FBsf0000246599);(TF_binding_site|mE1_TFBS_HSA|FBsf0000356514)
20	2	2R_9823699_SNP	FBgn0013733	shot	INTRON	0	T	G	G	0.1282	5	34	-1.827	1.01029e-08	(TF_binding_site|BDTNP1_TFBS_da|FBsf0000324168);(TF_binding_site|BDTNP1_TFBS_dl|FBsf0000301984);(TF_binding_site|BDTNP1_TFBS_Med|FBsf0000280262);(TF_binding_site|BDTNP1_TFBS_twi|FBsf0000199305);(TF_binding_site|mE1_TFBS_bab1|FBsf0000214249);(TF_binding_site|mE1_TFBS_cad|FBsf0000246599);(TF_binding_site|mE1_TFBS_HSA|FBsf0000356514)
20	2	2R_9823730_SNP	FBgn0013733	shot	INTRON	0	T	C	C	0.1026	4	35	-1.814	1.38343e-07	(TF_binding_site|BDTNP1_TFBS_da|FBsf0000324168);(TF_binding_site|BDTNP1_TFBS_dl|FBsf0000301984);(TF_binding_site|BDTNP1_TFBS_Med|FBsf0000280262);(TF_binding_site|BDTNP1_TFBS_twi|FBsf0000199305);(TF_binding_site|mE1_TFBS_bab1|FBsf0000214249);(TF_binding_site|mE1_TFBS_cad|FBsf0000246599);(TF_binding_site|mE1_TFBS_HSA|FBsf0000356514)
20	2	2R_9823933_SNP	FBgn0013733	shot	INTRON	0	T	A	A	0.1026	4	35	-1.814	1.38343e-07	(TF_binding_site|BDTNP1_TFBS_da|FBsf0000324168);(TF_binding_site|BDTNP1_TFBS_dl|FBsf0000301984);(TF_binding_site|BDTNP1_TFBS_Med|FBsf0000280262);(TF_binding_site|BDTNP1_TFBS_twi|FBsf0000199305);(TF_binding_site|mE1_TFBS_bab1|FBsf0000214249);(TF_binding_site|mE1_TFBS_cad|FBsf0000246599);(TF_binding_site|mE1_TFBS_HSA|FBsf0000356514)
20	2	2R_9826447_SNP	FBgn0013733	shot	INTRON	0	A	G	G	0.125	5	35	-1.795	2.97037e-08	(TF_binding_site|BDTNP1_TFBS_da|FBsf0000324171);(TF_binding_site|BDTNP1_TFBS_dl|FBsf0000301986);(TF_binding_site|BDTNP1_TFBS_prd|FBsf0000274412)
20	2	2R_9827807_SNP	FBgn0013733	shot	INTRON	0	A	T	T	0.125	5	35	-1.795	2.97037e-08	(TF_binding_site|BDTNP1_TFBS_da|FBsf0000324172);(TF_binding_site|BDTNP1_TFBS_dl|FBsf0000301987);(TF_binding_site|BDTNP1_TFBS_Med|FBsf0000280265);(TF_binding_site|BDTNP1_TFBS_twi|FBsf0000199307);(TF_binding_site|mE1_TFBS_HSA|FBsf0000356517);(TF_binding_site|mE1_TFBS_Kr|FBsf0000253402);(TF_binding_site|mE1_TFBS_Trl|FBsf0000338567)
20	2	2R_9827809_SNP	FBgn0013733	shot	INTRON	0	T	A	A	0.1026	4	35	-1.814	1.38343e-07	(TF_binding_site|BDTNP1_TFBS_da|FBsf0000324172);(TF_binding_site|BDTNP1_TFBS_dl|FBsf0000301987);(TF_binding_site|BDTNP1_TFBS_Med|FBsf0000280265);(TF_binding_site|BDTNP1_TFBS_twi|FBsf0000199307);(TF_binding_site|mE1_TFBS_HSA|FBsf0000356517);(TF_binding_site|mE1_TFBS_Kr|FBsf0000253402);(TF_binding_site|mE1_TFBS_Trl|FBsf0000338567)
20	2	2R_9827856_SNP	FBgn0013733	shot	INTRON	0	C	T	T	0.125	5	35	-1.795	2.97037e-08	(TF_binding_site|BDTNP1_TFBS_da|FBsf0000324172);(TF_binding_site|BDTNP1_TFBS_dl|FBsf0000301987);(TF_binding_site|BDTNP1_TFBS_hb|FBsf0000290159);(TF_binding_site|BDTNP1_TFBS_Med|FBsf0000280265);(TF_binding_site|BDTNP1_TFBS_twi|FBsf0000199307);(TF_binding_site|mE1_TFBS_HSA|FBsf0000356517);(TF_binding_site|mE1_TFBS_Kr|FBsf0000253402);(TF_binding_site|mE1_TFBS_Trl|FBsf0000338567)
20	2	2R_9828007_SNP	FBgn0013733	shot	INTRON	0	A	T	T	0.125	5	35	-1.795	2.97037e-08	(TF_binding_site|BDTNP1_TFBS_da|FBsf0000324172);(TF_binding_site|BDTNP1_TFBS_dl|FBsf0000301987);(TF_binding_site|BDTNP1_TFBS_hb|FBsf0000290159);(TF_binding_site|BDTNP1_TFBS_Med|FBsf0000280265);(TF_binding_site|BDTNP1_TFBS_twi|FBsf0000199307);(TF_binding_site|mE1_TFBS_HSA|FBsf0000356517);(TF_binding_site|mE1_TFBS_Kr|FBsf0000253402);(TF_binding_site|mE1_TFBS_Trl|FBsf0000338567)
20	2	2R_9828021_SNP	FBgn0013733	shot	INTRON	0	A	G	G	0.125	5	35	-1.795	2.97037e-08	(TF_binding_site|BDTNP1_TFBS_da|FBsf0000324172);(TF_binding_site|BDTNP1_TFBS_dl|FBsf0000301987);(TF_binding_site|BDTNP1_TFBS_hb|FBsf0000290159);(TF_binding_site|BDTNP1_TFBS_Med|FBsf0000280265);(TF_binding_site|BDTNP1_TFBS_twi|FBsf0000199307);(TF_binding_site|mE1_TFBS_HSA|FBsf0000356517);(TF_binding_site|mE1_TFBS_Kr|FBsf0000253402);(TF_binding_site|mE1_TFBS_Trl|FBsf0000338567)
20	2	2R_9828039_SNP	FBgn0013733	shot	INTRON	0	C	T	T	0.1026	4	35	-1.814	1.38343e-07	(TF_binding_site|BDTNP1_TFBS_da|FBsf0000324172);(TF_binding_site|BDTNP1_TFBS_dl|FBsf0000301987);(TF_binding_site|BDTNP1_TFBS_hb|FBsf0000290159);(TF_binding_site|BDTNP1_TFBS_Med|FBsf0000280265);(TF_binding_site|BDTNP1_TFBS_twi|FBsf0000199307);(TF_binding_site|mE1_TFBS_HSA|FBsf0000356517);(TF_binding_site|mE1_TFBS_Kr|FBsf0000253402);(TF_binding_site|mE1_TFBS_Trl|FBsf0000338567)
20	2	2R_9828073_SNP	FBgn0013733	shot	INTRON	0	G	A	A	0.1282	5	34	-1.803	2.59241e-08	(TF_binding_site|BDTNP1_TFBS_da|FBsf0000324172);(TF_binding_site|BDTNP1_TFBS_dl|FBsf0000301987);(TF_binding_site|BDTNP1_TFBS_hb|FBsf0000290159);(TF_binding_site|BDTNP1_TFBS_Med|FBsf0000280265);(TF_binding_site|BDTNP1_TFBS_twi|FBsf0000199307);(TF_binding_site|mE1_TFBS_HSA|FBsf0000356517);(TF_binding_site|mE1_TFBS_Kr|FBsf0000253402);(TF_binding_site|mE1_TFBS_Trl|FBsf0000338567)
20	2	2R_9829500_SNP	FBgn0013733	shot	INTRON	0	T	G	G	0.2	8	32	-1.36	1.24595e-06	(TF_binding_site|BDTNP1_TFBS_da|FBsf0000324174);(TF_binding_site|BDTNP1_TFBS_hb|FBsf0000290159);(TF_binding_site|BDTNP1_TFBS_Med|FBsf0000280266);(TF_binding_site|BDTNP1_TFBS_sna|FBsf0000267742);(TF_binding_site|BDTNP1_TFBS_twi|FBsf0000199308);(TF_binding_site|mE1_TFBS_bab1|FBsf0000214250);(TF_binding_site|mE1_TFBS_cad|FBsf0000246600);(TF_binding_site|mE1_TFBS_D|FBsf0000240645);(TF_binding_site|mE…
20	2	2R_9829500_SNP	FBgn0033885	DJ-1alpha	DOWNSTREAM	539	T	G	G	0.2	8	32	-1.36	1.24595e-06	(TF_binding_site|BDTNP1_TFBS_da|FBsf0000324174);(TF_binding_site|BDTNP1_TFBS_hb|FBsf0000290159);(TF_binding_site|BDTNP1_TFBS_Med|FBsf0000280266);(TF_binding_site|BDTNP1_TFBS_sna|FBsf0000267742);(TF_binding_site|BDTNP1_TFBS_twi|FBsf0000199308);(TF_binding_site|mE1_TFBS_bab1|FBsf0000214250);(TF_binding_site|mE1_TFBS_cad|FBsf0000246600);(TF_binding_site|mE1_TFBS_D|FBsf0000240645);(TF_binding_site|mE…
20	2	2R_9829823_SNP	FBgn0013733	shot	UPSTREAM	208	A	C	C	0.15	6	34	-1.536	1.24573e-06	(TF_binding_site|BDTNP1_TFBS_da|FBsf0000324174);(TF_binding_site|BDTNP1_TFBS_dl|FBsf0000301989);(TF_binding_site|BDTNP1_TFBS_hb|FBsf0000290159);(TF_binding_site|BDTNP1_TFBS_Med|FBsf0000280267);(TF_binding_site|BDTNP1_TFBS_sna|FBsf0000267743);(TF_binding_site|BDTNP1_TFBS_twi|FBsf0000199309);(TF_binding_site|mE1_TFBS_bab1|FBsf0000214250);(TF_binding_site|mE1_TFBS_GATAe|FBsf0000258391);(TF_binding_s…
20	2	2R_9829823_SNP	FBgn0033885	DJ-1alpha	DOWNSTREAM	216	A	C	C	0.15	6	34	-1.536	1.24573e-06	(TF_binding_site|BDTNP1_TFBS_da|FBsf0000324174);(TF_binding_site|BDTNP1_TFBS_dl|FBsf0000301989);(TF_binding_site|BDTNP1_TFBS_hb|FBsf0000290159);(TF_binding_site|BDTNP1_TFBS_Med|FBsf0000280267);(TF_binding_site|BDTNP1_TFBS_sna|FBsf0000267743);(TF_binding_site|BDTNP1_TFBS_twi|FBsf0000199309);(TF_binding_site|mE1_TFBS_bab1|FBsf0000214250);(TF_binding_site|mE1_TFBS_GATAe|FBsf0000258391);(TF_binding_s…
20	2	2R_9829990_DEL	FBgn0033885	DJ-1alpha	DOWNSTREAM	49	G	TAAAATAGTAGAGATT	TAAAATAGTAGAGATT	0.15	6	34	-1.536	1.24573e-06	(TF_binding_site|BDTNP1_TFBS_dl|FBsf0000301989);(TF_binding_site|BDTNP1_TFBS_Med|FBsf0000280267);(TF_binding_site|BDTNP1_TFBS_sna|FBsf0000267743);(TF_binding_site|BDTNP1_TFBS_twi|FBsf0000199309);(TF_binding_site|mE1_TFBS_bab1|FBsf0000214250);(TF_binding_site|mE1_TFBS_HSA|FBsf0000356518);(TF_binding_site|mE1_TFBS_inv|FBsf0000236574);(TF_binding_site|mE1_TFBS_kn|FBsf0000336355);(TF_binding_site|mE1…
20	2	2R_9829990_DEL	FBgn0013733	shot	UPSTREAM	375	G	TAAAATAGTAGAGATT	TAAAATAGTAGAGATT	0.15	6	34	-1.536	1.24573e-06	(TF_binding_site|BDTNP1_TFBS_dl|FBsf0000301989);(TF_binding_site|BDTNP1_TFBS_Med|FBsf0000280267);(TF_binding_site|BDTNP1_TFBS_sna|FBsf0000267743);(TF_binding_site|BDTNP1_TFBS_twi|FBsf0000199309);(TF_binding_site|mE1_TFBS_bab1|FBsf0000214250);(TF_binding_site|mE1_TFBS_HSA|FBsf0000356518);(TF_binding_site|mE1_TFBS_inv|FBsf0000236574);(TF_binding_site|mE1_TFBS_kn|FBsf0000336355);(TF_binding_site|mE1…
20	2	2R_9829990_DEL	FBgn0262739	AGO1	DOWNSTREAM	902	G	TAAAATAGTAGAGATT	TAAAATAGTAGAGATT	0.15	6	34	-1.536	1.24573e-06	(TF_binding_site|BDTNP1_TFBS_dl|FBsf0000301989);(TF_binding_site|BDTNP1_TFBS_Med|FBsf0000280267);(TF_binding_site|BDTNP1_TFBS_sna|FBsf0000267743);(TF_binding_site|BDTNP1_TFBS_twi|FBsf0000199309);(TF_binding_site|mE1_TFBS_bab1|FBsf0000214250);(TF_binding_site|mE1_TFBS_HSA|FBsf0000356518);(TF_binding_site|mE1_TFBS_inv|FBsf0000236574);(TF_binding_site|mE1_TFBS_kn|FBsf0000336355);(TF_binding_site|mE1…
20	2	2R_9830046_SNP	FBgn0033885	DJ-1alpha	UTR_3_PRIME	0	T	C	C	0.1282	5	34	-1.801	2.61551e-08	(TF_binding_site|BDTNP1_TFBS_dl|FBsf0000301989);(TF_binding_site|BDTNP1_TFBS_Med|FBsf0000280267);(TF_binding_site|BDTNP1_TFBS_sna|FBsf0000267743);(TF_binding_site|mE1_TFBS_bab1|FBsf0000214250);(TF_binding_site|mE1_TFBS_HSA|FBsf0000356518);(TF_binding_site|mE1_TFBS_inv|FBsf0000236574);(TF_binding_site|mE1_TFBS_kn|FBsf0000336355);(TF_binding_site|mE1_TFBS_ttk|FBsf0000335401);(TF_binding_site|mE1_TF…
20	2	2R_9830046_SNP	FBgn0013733	shot	UPSTREAM	431	T	C	C	0.1282	5	34	-1.801	2.61551e-08	(TF_binding_site|BDTNP1_TFBS_dl|FBsf0000301989);(TF_binding_site|BDTNP1_TFBS_Med|FBsf0000280267);(TF_binding_site|BDTNP1_TFBS_sna|FBsf0000267743);(TF_binding_site|mE1_TFBS_bab1|FBsf0000214250);(TF_binding_site|mE1_TFBS_HSA|FBsf0000356518);(TF_binding_site|mE1_TFBS_inv|FBsf0000236574);(TF_binding_site|mE1_TFBS_kn|FBsf0000336355);(TF_binding_site|mE1_TFBS_ttk|FBsf0000335401);(TF_binding_site|mE1_TF…
20	2	2R_9830046_SNP	FBgn0262739	AGO1	DOWNSTREAM	846	T	C	C	0.1282	5	34	-1.801	2.61551e-08	(TF_binding_site|BDTNP1_TFBS_dl|FBsf0000301989);(TF_binding_site|BDTNP1_TFBS_Med|FBsf0000280267);(TF_binding_site|BDTNP1_TFBS_sna|FBsf0000267743);(TF_binding_site|mE1_TFBS_bab1|FBsf0000214250);(TF_binding_site|mE1_TFBS_HSA|FBsf0000356518);(TF_binding_site|mE1_TFBS_inv|FBsf0000236574);(TF_binding_site|mE1_TFBS_kn|FBsf0000336355);(TF_binding_site|mE1_TFBS_ttk|FBsf0000335401);(TF_binding_site|mE1_TF…
20	2	2R_9830051_SNP	FBgn0033885	DJ-1alpha	UTR_3_PRIME	0	C	T	T	0.15	6	34	-1.536	1.24573e-06	(TF_binding_site|BDTNP1_TFBS_dl|FBsf0000301989);(TF_binding_site|BDTNP1_TFBS_Med|FBsf0000280267);(TF_binding_site|BDTNP1_TFBS_sna|FBsf0000267743);(TF_binding_site|mE1_TFBS_bab1|FBsf0000214250);(TF_binding_site|mE1_TFBS_HSA|FBsf0000356518);(TF_binding_site|mE1_TFBS_inv|FBsf0000236574);(TF_binding_site|mE1_TFBS_kn|FBsf0000336355);(TF_binding_site|mE1_TFBS_ttk|FBsf0000335401);(TF_binding_site|mE1_TF…
20	2	2R_9830051_SNP	FBgn0013733	shot	UPSTREAM	436	C	T	T	0.15	6	34	-1.536	1.24573e-06	(TF_binding_site|BDTNP1_TFBS_dl|FBsf0000301989);(TF_binding_site|BDTNP1_TFBS_Med|FBsf0000280267);(TF_binding_site|BDTNP1_TFBS_sna|FBsf0000267743);(TF_binding_site|mE1_TFBS_bab1|FBsf0000214250);(TF_binding_site|mE1_TFBS_HSA|FBsf0000356518);(TF_binding_site|mE1_TFBS_inv|FBsf0000236574);(TF_binding_site|mE1_TFBS_kn|FBsf0000336355);(TF_binding_site|mE1_TFBS_ttk|FBsf0000335401);(TF_binding_site|mE1_TF…
20	2	2R_9830051_SNP	FBgn0262739	AGO1	DOWNSTREAM	841	C	T	T	0.15	6	34	-1.536	1.24573e-06	(TF_binding_site|BDTNP1_TFBS_dl|FBsf0000301989);(TF_binding_site|BDTNP1_TFBS_Med|FBsf0000280267);(TF_binding_site|BDTNP1_TFBS_sna|FBsf0000267743);(TF_binding_site|mE1_TFBS_bab1|FBsf0000214250);(TF_binding_site|mE1_TFBS_HSA|FBsf0000356518);(TF_binding_site|mE1_TFBS_inv|FBsf0000236574);(TF_binding_site|mE1_TFBS_kn|FBsf0000336355);(TF_binding_site|mE1_TFBS_ttk|FBsf0000335401);(TF_binding_site|mE1_TF…
20	2	2R_9830064_DEL	FBgn0033885	DJ-1alpha	UTR_3_PRIME	0	T	TAACTTATGATCAG	TAACTTATGATCAG	0.15	6	34	-1.536	1.24573e-06	(TF_binding_site|BDTNP1_TFBS_dl|FBsf0000301989);(TF_binding_site|BDTNP1_TFBS_Med|FBsf0000280267);(TF_binding_site|BDTNP1_TFBS_sna|FBsf0000267743);(TF_binding_site|mE1_TFBS_bab1|FBsf0000214250);(TF_binding_site|mE1_TFBS_HSA|FBsf0000356518);(TF_binding_site|mE1_TFBS_inv|FBsf0000236574);(TF_binding_site|mE1_TFBS_kn|FBsf0000336355);(TF_binding_site|mE1_TFBS_ttk|FBsf0000335401);(TF_binding_site|mE1_TF…
20	2	2R_9830064_DEL	FBgn0013733	shot	UPSTREAM	450	T	TAACTTATGATCAG	TAACTTATGATCAG	0.15	6	34	-1.536	1.24573e-06	(TF_binding_site|BDTNP1_TFBS_dl|FBsf0000301989);(TF_binding_site|BDTNP1_TFBS_Med|FBsf0000280267);(TF_binding_site|BDTNP1_TFBS_sna|FBsf0000267743);(TF_binding_site|mE1_TFBS_bab1|FBsf0000214250);(TF_binding_site|mE1_TFBS_HSA|FBsf0000356518);(TF_binding_site|mE1_TFBS_inv|FBsf0000236574);(TF_binding_site|mE1_TFBS_kn|FBsf0000336355);(TF_binding_site|mE1_TFBS_ttk|FBsf0000335401);(TF_binding_site|mE1_TF…
20	2	2R_9830064_DEL	FBgn0262739	AGO1	DOWNSTREAM	827	T	TAACTTATGATCAG	TAACTTATGATCAG	0.15	6	34	-1.536	1.24573e-06	(TF_binding_site|BDTNP1_TFBS_dl|FBsf0000301989);(TF_binding_site|BDTNP1_TFBS_Med|FBsf0000280267);(TF_binding_site|BDTNP1_TFBS_sna|FBsf0000267743);(TF_binding_site|mE1_TFBS_bab1|FBsf0000214250);(TF_binding_site|mE1_TFBS_HSA|FBsf0000356518);(TF_binding_site|mE1_TFBS_inv|FBsf0000236574);(TF_binding_site|mE1_TFBS_kn|FBsf0000336355);(TF_binding_site|mE1_TFBS_ttk|FBsf0000335401);(TF_binding_site|mE1_TF…
20	2	3L_11120958_SNP	FBgn0260795	CG42575	INTRON	0	C	T	T	0.2973	11	26	-1.244	8.7165e-07	-
20	2	3L_11121339_SNP	FBgn0260795	CG42575	INTRON	0	G	T	T	0.25	10	30	-1.303	2.34338e-07	-
20	2	3L_14277012_SNP	FBgn0001085	fz	INTRON	0	C	T	T	0.1316	5	33	-1.83	9.65491e-09	-
20	2	3L_20566632_SNP	Intergenic	Intergenic			C	T	T	0.1053	4	34	-1.788	2.6667e-07	-
20	2	3L_21046336_DEL	FBgn0026179	siz	INTRON	0	A	AT	AT	0.1026	4	35	-1.809	1.57235e-07	(TF_binding_site|BDTNP1_TFBS_dl|FBsf0000308916);(TF_binding_site|BDTNP1_TFBS_Med|FBsf0000283831);(TF_binding_site|mE1_TFBS_HSA|FBsf0000367388)
20	2	3L_21058696_SNP	FBgn0026179	siz	INTRON	0	C	G	G	0.1053	4	34	-1.817	1.39277e-07	(TF_binding_site|BDTNP1_TFBS_da|FBsf0000327781);(TF_binding_site|BDTNP1_TFBS_dl|FBsf0000308924);(TF_binding_site|BDTNP1_TFBS_twi|FBsf0000204423);(TF_binding_site|mE1_TFBS_bab1|FBsf0000214578);(TF_binding_site|mE1_TFBS_cad|FBsf0000245529);(TF_binding_site|mE1_TFBS_HSA|FBsf0000367397)
20	2	3L_21058696_SNP	FBgn0262482	CG43072	UPSTREAM	256	C	G	G	0.1053	4	34	-1.817	1.39277e-07	(TF_binding_site|BDTNP1_TFBS_da|FBsf0000327781);(TF_binding_site|BDTNP1_TFBS_dl|FBsf0000308924);(TF_binding_site|BDTNP1_TFBS_twi|FBsf0000204423);(TF_binding_site|mE1_TFBS_bab1|FBsf0000214578);(TF_binding_site|mE1_TFBS_cad|FBsf0000245529);(TF_binding_site|mE1_TFBS_HSA|FBsf0000367397)
20	2	3L_21061183_SNP	FBgn0026179	siz	INTRON	0	G	A	A	0.1053	4	34	-1.81	1.61752e-07	(TF_binding_site|BDTNP1_TFBS_bcd|FBsf0000333963);(TF_binding_site|BDTNP1_TFBS_da|FBsf0000327783);(TF_binding_site|BDTNP1_TFBS_dl|FBsf0000308926);(TF_binding_site|BDTNP1_TFBS_gt|FBsf0000294127);(TF_binding_site|BDTNP1_TFBS_hb|FBsf0000291611);(TF_binding_site|BDTNP1_TFBS_kni|FBsf0000289801);(TF_binding_site|BDTNP1_TFBS_Med|FBsf0000283835);(TF_binding_site|BDTNP1_TFBS_prd|FBsf0000275771);(TF_binding…
20	2	3L_21080876_SNP	FBgn0020294	ko	INTRON	0	T	C	C	0.1026	4	35	-1.809	1.57235e-07	(regulatory_region|REDfly_CRMs|FBsf0000435537);(TF_binding_site|BDTNP1_TFBS_twi|FBsf0000204424);(TF_binding_site|mE1_TFBS_HSA|FBsf0000367405)
20	2	3L_21080876_SNP	FBgn0053285	CG33285	DOWNSTREAM	447	T	C	C	0.1026	4	35	-1.809	1.57235e-07	(regulatory_region|REDfly_CRMs|FBsf0000435537);(TF_binding_site|BDTNP1_TFBS_twi|FBsf0000204424);(TF_binding_site|mE1_TFBS_HSA|FBsf0000367405)
20	2	3L_21081066_SNP	FBgn0020294	ko	INTRON	0	T	A	A	0.1053	4	34	-1.809	1.66121e-07	(regulatory_region|REDfly_CRMs|FBsf0000435537);(TF_binding_site|BDTNP1_TFBS_twi|FBsf0000204424)
20	2	3L_21081066_SNP	FBgn0053285	CG33285	DOWNSTREAM	257	T	A	A	0.1053	4	34	-1.809	1.66121e-07	(regulatory_region|REDfly_CRMs|FBsf0000435537);(TF_binding_site|BDTNP1_TFBS_twi|FBsf0000204424)
20	2	3R_11487968_SNP	Intergenic	Intergenic			C	A	C	0.1471	5	29	-1.614	1.11562e-06	(TF_binding_site|mE1_TFBS_Kr|FBsf0000253746)
20	2	3R_12558129_SNP	FBgn0003944	Ubx	INTRON	0	T	C	C	0.225	9	31	-1.316	9.5807e-07	(TF_binding_site|BDTNP1_TFBS_da|FBsf0000329536);(TF_binding_site|BDTNP1_TFBS_dl|FBsf0000312211);(TF_binding_site|mE1_TFBS_HSA|FBsf0000372343)
20	2	3R_15040719_SNP	FBgn0025680	cry	INTRON	0	T	A	A	0.275	11	29	-1.245	3.36146e-07	-
20	2	3R_15040719_SNP	FBgn0262468	vib	DOWNSTREAM	437	T	A	A	0.275	11	29	-1.245	3.36146e-07	-
20	2	3R_15040723_SNP	FBgn0025680	cry	INTRON	0	T	C	C	0.2821	11	28	-1.244	4.09728e-07	-
20	2	3R_15040723_SNP	FBgn0262468	vib	DOWNSTREAM	433	T	C	C	0.2821	11	28	-1.244	4.09728e-07	-
20	2	3R_15040728_SNP	FBgn0025680	cry	INTRON	0	A	T	T	0.275	11	29	-1.245	3.36146e-07	-
20	2	3R_15040728_SNP	FBgn0262468	vib	DOWNSTREAM	428	A	T	T	0.275	11	29	-1.245	3.36146e-07	-
20	2	3R_17255152_SNP	FBgn0008651	lbl	INTRON	0	T	C	C	0.1053	4	34	-1.759	5.0567e-07	(TF_binding_site|BDTNP1_TFBS_da|FBsf0000329997)
20	2	3R_20398392_SNP	FBgn0039209	CG13624	INTRON	0	T	C	C	0.1	4	36	-1.761	4.38572e-07	(TF_binding_site|BDTNP1_TFBS_dl|FBsf0000313850);(TF_binding_site|mE1_TFBS_Trl|FBsf0000341670)
20	2	3R_20398852_SNP	FBgn0039209	CG13624	INTRON	0	T	C	C	0.1026	4	35	-1.765	4.20233e-07	(TF_binding_site|BDTNP1_TFBS_dl|FBsf0000313850);(TF_binding_site|mE1_TFBS_HSA|FBsf0000374866);(TF_binding_site|mE1_TFBS_Trl|FBsf0000341671)
20	2	3R_20399339_SNP	FBgn0039209	CG13624	INTRON	0	C	T	T	0.1053	4	34	-1.739	7.75967e-07	(TF_binding_site|mE1_TFBS_HSA|FBsf0000374866)
20	2	X_13237944_SNP	FBgn0267272	CR45708	DOWNSTREAM	970	G	T	G	0.1795	7	32	-1.461	1.02451e-06	-
20	2	X_13237948_DEL	FBgn0267272	CR45708	DOWNSTREAM	965	ATT	A	ATT	0.175	7	33	-1.471	6.80814e-07	-
20	2	X_13237978_SNP	FBgn0267272	CR45708	DOWNSTREAM	936	T	G	T	0.175	7	33	-1.471	6.80814e-07	-
20	2	X_13237987_SNP	FBgn0267272	CR45708	DOWNSTREAM	927	T	G	T	0.1795	7	32	-1.461	1.02451e-06	-
20	2	X_13237988_SNP	FBgn0267272	CR45708	DOWNSTREAM	926	T	G	T	0.175	7	33	-1.471	6.80814e-07	-
20	2	X_13238012_SNP	FBgn0267272	CR45708	DOWNSTREAM	902	C	T	C	0.175	7	33	-1.471	6.80814e-07	-
20	2	X_13238014_SNP	FBgn0267272	CR45708	DOWNSTREAM	900	C	T	C	0.1892	7	30	-1.543	8.30581e-08	-
20	2	X_13238015_SNP	FBgn0267272	CR45708	DOWNSTREAM	899	T	G	T	0.1795	7	32	-1.487	4.35058e-07	-
20	2	X_13238030_SNP	FBgn0267272	CR45708	DOWNSTREAM	884	T	C	T	0.1795	7	32	-1.459	1.1581e-06	-
20	2	X_13238047_INS	FBgn0267272	CR45708	DOWNSTREAM	866	G	GAGTAAAG	G	0.175	7	33	-1.471	6.80814e-07	-
20	2	X_13238055_INS	FBgn0267272	CR45708	DOWNSTREAM	859	T	AGAA	T	0.175	7	33	-1.471	6.80814e-07	-
20	2	X_21439075_SNP	Intergenic	Intergenic			A	G	G	0.1026	4	35	-1.76	4.73329e-07	-
20	2	X_2598584_SNP	FBgn0024996	eIF2B-beta	UPSTREAM	20	A	C	C	0.125	5	35	-1.651	2.98357e-07	(TF_binding_site|BDTNP1_TFBS_dl|FBsf0000316161);(TF_binding_site|mE1_TFBS_cad|FBsf0000242774);(TF_binding_site|mE1_TFBS_D|FBsf0000238402);(TF_binding_site|mE1_TFBS_HSA|FBsf0000378658);(TF_binding_site|mE1_TFBS_run|FBsf0000336046)
20	2	X_2598584_SNP	FBgn0024994	Csat	UPSTREAM	699	A	C	C	0.125	5	35	-1.651	2.98357e-07	(TF_binding_site|BDTNP1_TFBS_dl|FBsf0000316161);(TF_binding_site|mE1_TFBS_cad|FBsf0000242774);(TF_binding_site|mE1_TFBS_D|FBsf0000238402);(TF_binding_site|mE1_TFBS_HSA|FBsf0000378658);(TF_binding_site|mE1_TFBS_run|FBsf0000336046)
20	3	2L_1442247_SNP	FBgn0263321	CG43402	UPSTREAM	380	C	T	T	0.1	4	36	1.495	1.36249e-06	-
20	3	2L_1443067_SNP	FBgn0263321	CG43402	NON_SYNONYMOUS_CODING	0	A	C	C	0.1	4	36	1.495	1.36249e-06	-
20	3	2L_1443070_SNP	FBgn0263321	CG43402	NON_SYNONYMOUS_CODING	0	T	G	G	0.1	4	36	1.495	1.36249e-06	-
20	3	2L_1443221_SNP	FBgn0263321	CG43402	NON_SYNONYMOUS_CODING	0	A	C	C	0.1053	4	34	1.522	8.1967e-07	-
20	3	2L_1444771_SNP	FBgn0263321	CG43402	DOWNSTREAM	939	T	G	G	0.1026	4	35	1.491	1.56265e-06	(TF_binding_site|mE1_TFBS_chinmo|FBsf0000206982);(TF_binding_site|mE1_TFBS_HSA|FBsf0000344373)
20	3	2L_1445168_SNP	Intergenic	Intergenic			G	C	C	0.1	4	36	1.495	1.36249e-06	-
20	3	2R_16937882_SNP	FBgn0003391	shg	UTR_3_PRIME	0	C	G	G	0.1026	4	35	1.492	1.51494e-06	(TF_binding_site|BDTNP1_TFBS_dl|FBsf0000303595)
20	3	3L_10358795_SNP	FBgn0265415	CR44327	EXON	0	A	C	C	0.1538	6	33	1.326	1.94773e-07	(TF_binding_site|mE1_TFBS_HSA|FBsf0000363900);(TF_binding_site|mE1_TFBS_zfh1|FBsf0000334804)
20	3	3L_10358795_SNP	FBgn0266076	mir-276a	DOWNSTREAM	370	A	C	C	0.1538	6	33	1.326	1.94773e-07	(TF_binding_site|mE1_TFBS_HSA|FBsf0000363900);(TF_binding_site|mE1_TFBS_zfh1|FBsf0000334804)
20	3	3L_10358935_SNP	FBgn0265415	CR44327	EXON	0	A	G	G	0.1282	5	34	1.407	3.89345e-07	(TF_binding_site|mE1_TFBS_D|FBsf0000239250);(TF_binding_site|mE1_TFBS_HSA|FBsf0000363900);(TF_binding_site|mE1_TFBS_zfh1|FBsf0000334804)
20	3	3L_10358935_SNP	FBgn0266076	mir-276a	DOWNSTREAM	510	A	G	G	0.1282	5	34	1.407	3.89345e-07	(TF_binding_site|mE1_TFBS_D|FBsf0000239250);(TF_binding_site|mE1_TFBS_HSA|FBsf0000363900);(TF_binding_site|mE1_TFBS_zfh1|FBsf0000334804)
20	3	3L_10359601_SNP	FBgn0265415	CR44327	EXON	0	A	T	T	0.175	7	33	1.233	2.79771e-07	-
20	3	3L_5711780_SNP	FBgn0085447	sif	INTRON	0	T	C	C	0.1538	6	33	1.404	1.41939e-08	-
20	3	X_17363675_INS	FBgn0263706	CG43658	INTRON	0	GTATTTG	G	G	0.1389	5	31	1.392	7.25905e-07	-
20	4	2L_16981610_SNP	FBgn0053179	beat-IIIb	INTRON	0	T	A	T	0.4	16	24	0.8188	1.42394e-06	-
20	4	2L_16981610_SNP	FBgn0265579	CG44406	DOWNSTREAM	257	T	A	T	0.4	16	24	0.8188	1.42394e-06	-
20	4	2L_16981610_SNP	FBgn0265581	CR44408	UPSTREAM	873	T	A	T	0.4	16	24	0.8188	1.42394e-06	-
20	4	3L_18982518_SNP	FBgn0085285	CG34256	INTRON	0	A	C	A	0.2703	10	27	0.9425	4.15799e-07	(TF_binding_site|BDTNP1_TFBS_prd|FBsf0000275726)
20	4	3L_18982518_SNP	FBgn0036837	CG18135	DOWNSTREAM	608	A	C	A	0.2703	10	27	0.9425	4.15799e-07	(TF_binding_site|BDTNP1_TFBS_prd|FBsf0000275726)
20	4	X_14702006_SNP	FBgn0003301	rut	INTRON	0	C	T	T	0.325	13	27	0.8495	1.83061e-06	-
20	5	2L_12089063_SNP	Intergenic	Intergenic			T	C	C	0.1026	4	35	-1.298	3.18181e-08	(regulatory_region|REDfly_CRMs|FBsf0000435622);(regulatory_region|REDfly_CRMs|FBsf0000436127);(TF_binding_site|BDTNP1_TFBS_bcd|FBsf0000333688);(TF_binding_site|BDTNP1_TFBS_da|FBsf0000322230);(TF_binding_site|BDTNP1_TFBS_dl|FBsf0000298238);(TF_binding_site|BDTNP1_TFBS_hb|FBsf0000290779);(TF_binding_site|BDTNP1_TFBS_Med|FBsf0000278393);(TF_binding_site|BDTNP1_TFBS_prd|FBsf0000275016);(TF_binding_si…
20	5	2L_12090552_SNP	Intergenic	Intergenic			A	T	T	0.1	4	36	-1.287	4.51975e-08	(TF_binding_site|BDTNP1_TFBS_dl|FBsf0000298240);(TF_binding_site|BDTNP1_TFBS_prd|FBsf0000275016);(TF_binding_site|mE1_TFBS_cad|FBsf0000241951)
20	5	2L_12091758_SNP	FBgn0032407	Pex19	UPSTREAM	64	T	C	C	0.1026	4	35	-1.277	7.03821e-08	(regulatory_region|REDfly_CRMs|FBsf0000435887);(TF_binding_site|BDTNP1_TFBS_dl|FBsf0000298241);(TF_binding_site|BDTNP1_TFBS_gt|FBsf0000293179);(TF_binding_site|BDTNP1_TFBS_hb|FBsf0000290780);(TF_binding_site|BDTNP1_TFBS_Med|FBsf0000278395);(TF_binding_site|BDTNP1_TFBS_prd|FBsf0000275017);(TF_binding_site|BDTNP1_TFBS_tll|FBsf0000266722);(TF_binding_site|BDTNP1_TFBS_twi|FBsf0000201511);(TF_binding_…
20	5	2L_12091758_SNP	FBgn0265805	CR44594	DOWNSTREAM	251	T	C	C	0.1026	4	35	-1.277	7.03821e-08	(regulatory_region|REDfly_CRMs|FBsf0000435887);(TF_binding_site|BDTNP1_TFBS_dl|FBsf0000298241);(TF_binding_site|BDTNP1_TFBS_gt|FBsf0000293179);(TF_binding_site|BDTNP1_TFBS_hb|FBsf0000290780);(TF_binding_site|BDTNP1_TFBS_Med|FBsf0000278395);(TF_binding_site|BDTNP1_TFBS_prd|FBsf0000275017);(TF_binding_site|BDTNP1_TFBS_tll|FBsf0000266722);(TF_binding_site|BDTNP1_TFBS_twi|FBsf0000201511);(TF_binding_…
20	5	2L_12092360_SNP	FBgn0032407	Pex19	INTRON	0	A	T	T	0.1	4	36	-1.287	4.51975e-08	(regulatory_region|REDfly_CRMs|FBsf0000435887);(TF_binding_site|BDTNP1_TFBS_da|FBsf0000322231);(TF_binding_site|BDTNP1_TFBS_ftz|FBsf0000295109);(TF_binding_site|BDTNP1_TFBS_gt|FBsf0000293179);(TF_binding_site|BDTNP1_TFBS_hb|FBsf0000290780);(TF_binding_site|BDTNP1_TFBS_Med|FBsf0000278395);(TF_binding_site|BDTNP1_TFBS_prd|FBsf0000275017);(TF_binding_site|BDTNP1_TFBS_tll|FBsf0000266722);(TF_binding_…
20	5	2L_12092360_SNP	FBgn0265805	CR44594	UPSTREAM	2	A	T	T	0.1	4	36	-1.287	4.51975e-08	(regulatory_region|REDfly_CRMs|FBsf0000435887);(TF_binding_site|BDTNP1_TFBS_da|FBsf0000322231);(TF_binding_site|BDTNP1_TFBS_ftz|FBsf0000295109);(TF_binding_site|BDTNP1_TFBS_gt|FBsf0000293179);(TF_binding_site|BDTNP1_TFBS_hb|FBsf0000290780);(TF_binding_site|BDTNP1_TFBS_Med|FBsf0000278395);(TF_binding_site|BDTNP1_TFBS_prd|FBsf0000275017);(TF_binding_site|BDTNP1_TFBS_tll|FBsf0000266722);(TF_binding_…
20	5	2L_12094731_SNP	FBgn0032407	Pex19	INTRON	0	A	G	G	0.1026	4	35	-1.273	8.02176e-08	(regulatory_region|REDfly_CRMs|FBsf0000435693);(TF_binding_site|BDTNP1_TFBS_dl|FBsf0000298244);(TF_binding_site|BDTNP1_TFBS_hb|FBsf0000290781);(TF_binding_site|mE1_TFBS_cad|FBsf0000241952)
20	5	2L_12094731_SNP	FBgn0032408	CG6712	DOWNSTREAM	445	A	G	G	0.1026	4	35	-1.273	8.02176e-08	(regulatory_region|REDfly_CRMs|FBsf0000435693);(TF_binding_site|BDTNP1_TFBS_dl|FBsf0000298244);(TF_binding_site|BDTNP1_TFBS_hb|FBsf0000290781);(TF_binding_site|mE1_TFBS_cad|FBsf0000241952)
20	5	2L_12095482_SNP	FBgn0032408	CG6712	SYNONYMOUS_CODING	0	G	A	A	0.1026	4	35	-1.281	6.048e-08	(regulatory_region|REDfly_CRMs|FBsf0000435693);(TF_binding_site|mE1_TFBS_cad|FBsf0000241952);(TF_binding_site|mE1_TFBS_HSA|FBsf0000350453);(TF_binding_site|mE1_TFBS_sens|FBsf0000217390)
20	5	2L_12095482_SNP	FBgn0032407	Pex19	DOWNSTREAM	232	G	A	A	0.1026	4	35	-1.281	6.048e-08	(regulatory_region|REDfly_CRMs|FBsf0000435693);(TF_binding_site|mE1_TFBS_cad|FBsf0000241952);(TF_binding_site|mE1_TFBS_HSA|FBsf0000350453);(TF_binding_site|mE1_TFBS_sens|FBsf0000217390)
20	5	2L_12096364_SNP	FBgn0032408	CG6712	SYNONYMOUS_CODING	0	A	G	G	0.1842	7	31	-0.955	8.29881e-07	(TF_binding_site|BDTNP1_TFBS_dl|FBsf0000298245);(TF_binding_site|BDTNP1_TFBS_Med|FBsf0000278398);(TF_binding_site|BDTNP1_TFBS_twi|FBsf0000201514);(TF_binding_site|mE1_TFBS_cad|FBsf0000241952);(TF_binding_site|mE1_TFBS_HSA|FBsf0000350453)
20	5	2L_12096364_SNP	FBgn0028707	Mt2	UPSTREAM	161	A	G	G	0.1842	7	31	-0.955	8.29881e-07	(TF_binding_site|BDTNP1_TFBS_dl|FBsf0000298245);(TF_binding_site|BDTNP1_TFBS_Med|FBsf0000278398);(TF_binding_site|BDTNP1_TFBS_twi|FBsf0000201514);(TF_binding_site|mE1_TFBS_cad|FBsf0000241952);(TF_binding_site|mE1_TFBS_HSA|FBsf0000350453)
20	5	2L_12106946_SNP	FBgn0027081	Aats-thr	DOWNSTREAM	52	T	A	A	0.125	5	35	-1.075	1.36359e-06	-
20	5	2L_12106946_SNP	FBgn0015797	Rab6	DOWNSTREAM	275	T	A	A	0.125	5	35	-1.075	1.36359e-06	-
20	5	2L_12106949_SNP	FBgn0027081	Aats-thr	DOWNSTREAM	55	T	C	C	0.125	5	35	-1.075	1.36359e-06	-
20	5	2L_12106949_SNP	FBgn0015797	Rab6	DOWNSTREAM	272	T	C	C	0.125	5	35	-1.075	1.36359e-06	-
20	5	2L_12106971_SNP	FBgn0027081	Aats-thr	DOWNSTREAM	77	T	G	G	0.125	5	35	-1.075	1.36359e-06	-
20	5	2L_12106971_SNP	FBgn0015797	Rab6	DOWNSTREAM	250	T	G	G	0.125	5	35	-1.075	1.36359e-06	-
20	5	2L_12106999_SNP	FBgn0027081	Aats-thr	DOWNSTREAM	105	C	T	T	0.125	5	35	-1.075	1.36359e-06	-
20	5	2L_12106999_SNP	FBgn0015797	Rab6	DOWNSTREAM	222	C	T	T	0.125	5	35	-1.075	1.36359e-06	-
20	5	2L_12107842_SNP	FBgn0015797	Rab6	UTR_3_PRIME	0	T	C	C	0.1	4	36	-1.287	4.51975e-08	-
20	5	2L_12107842_SNP	FBgn0027081	Aats-thr	DOWNSTREAM	672	T	C	C	0.1	4	36	-1.287	4.51975e-08	-
20	5	2L_12108042_SNP	FBgn0015797	Rab6	UTR_3_PRIME	0	A	C	C	0.1	4	36	-1.287	4.51975e-08	(TF_binding_site|mE1_TFBS_chinmo|FBsf0000207626);(TF_binding_site|mE1_TFBS_sens|FBsf0000217396)
20	5	2L_12108042_SNP	FBgn0027081	Aats-thr	DOWNSTREAM	872	A	C	C	0.1	4	36	-1.287	4.51975e-08	(TF_binding_site|mE1_TFBS_chinmo|FBsf0000207626);(TF_binding_site|mE1_TFBS_sens|FBsf0000217396)
20	5	2L_12108323_SNP	FBgn0015797	Rab6	SYNONYMOUS_CODING	0	C	G	G	0.1	4	36	-1.287	4.51975e-08	(TF_binding_site|BDTNP1_TFBS_dl|FBsf0000298251);(TF_binding_site|BDTNP1_TFBS_Med|FBsf0000278402);(TF_binding_site|mE1_TFBS_chinmo|FBsf0000207626);(TF_binding_site|mE1_TFBS_sens|FBsf0000217396);(TF_binding_site|mE1_TFBS_Trl|FBsf0000337537)
20	5	2L_12108581_SNP	FBgn0015797	Rab6	SYNONYMOUS_CODING	0	A	T	T	0.1081	4	33	-1.18	1.8956e-06	(TF_binding_site|BDTNP1_TFBS_dl|FBsf0000298251);(TF_binding_site|BDTNP1_TFBS_Med|FBsf0000278402);(TF_binding_site|mE1_TFBS_HSA|FBsf0000350459);(TF_binding_site|mE1_TFBS_sens|FBsf0000217396);(TF_binding_site|mE1_TFBS_Trl|FBsf0000337537)
20	5	2L_12108581_SNP	FBgn0263234	Phae1	UPSTREAM	836	A	T	T	0.1081	4	33	-1.18	1.8956e-06	(TF_binding_site|BDTNP1_TFBS_dl|FBsf0000298251);(TF_binding_site|BDTNP1_TFBS_Med|FBsf0000278402);(TF_binding_site|mE1_TFBS_HSA|FBsf0000350459);(TF_binding_site|mE1_TFBS_sens|FBsf0000217396);(TF_binding_site|mE1_TFBS_Trl|FBsf0000337537)
20	5	2L_12109018_SNP	FBgn0015797	Rab6	UTR_5_PRIME	0	G	A	A	0.1	4	36	-1.287	4.51975e-08	(TF_binding_site|BDTNP1_TFBS_dl|FBsf0000298251);(TF_binding_site|BDTNP1_TFBS_Med|FBsf0000278402);(TF_binding_site|mE1_TFBS_HSA|FBsf0000350459);(TF_binding_site|mE1_TFBS_sens|FBsf0000217396);(TF_binding_site|mE1_TFBS_Trl|FBsf0000337537);(TF_binding_site|mE1_TFBS_Ubx|FBsf0000261881)
20	5	2L_12109018_SNP	FBgn0263234	Phae1	UPSTREAM	399	G	A	A	0.1	4	36	-1.287	4.51975e-08	(TF_binding_site|BDTNP1_TFBS_dl|FBsf0000298251);(TF_binding_site|BDTNP1_TFBS_Med|FBsf0000278402);(TF_binding_site|mE1_TFBS_HSA|FBsf0000350459);(TF_binding_site|mE1_TFBS_sens|FBsf0000217396);(TF_binding_site|mE1_TFBS_Trl|FBsf0000337537);(TF_binding_site|mE1_TFBS_Ubx|FBsf0000261881)
20	5	2L_12109296_SNP	FBgn0263234	Phae1	UPSTREAM	121	T	G	G	0.125	5	35	-1.075	1.36359e-06	(TF_binding_site|BDTNP1_TFBS_dl|FBsf0000298252);(TF_binding_site|BDTNP1_TFBS_Med|FBsf0000278403);(TF_binding_site|mE1_TFBS_D|FBsf0000238096);(TF_binding_site|mE1_TFBS_HSA|FBsf0000350459);(TF_binding_site|mE1_TFBS_Trl|FBsf0000337537);(TF_binding_site|mE1_TFBS_Ubx|FBsf0000261881)
20	5	2L_12109296_SNP	FBgn0015797	Rab6	UPSTREAM	180	T	G	G	0.125	5	35	-1.075	1.36359e-06	(TF_binding_site|BDTNP1_TFBS_dl|FBsf0000298252);(TF_binding_site|BDTNP1_TFBS_Med|FBsf0000278403);(TF_binding_site|mE1_TFBS_D|FBsf0000238096);(TF_binding_site|mE1_TFBS_HSA|FBsf0000350459);(TF_binding_site|mE1_TFBS_Trl|FBsf0000337537);(TF_binding_site|mE1_TFBS_Ubx|FBsf0000261881)
20	5	2L_12109373_SNP	FBgn0263234	Phae1	UPSTREAM	44	G	T	T	0.1282	5	34	-1.065	2.00545e-06	(TF_binding_site|BDTNP1_TFBS_dl|FBsf0000298252);(TF_binding_site|BDTNP1_TFBS_Med|FBsf0000278403);(TF_binding_site|mE1_TFBS_cad|FBsf0000241954);(TF_binding_site|mE1_TFBS_D|FBsf0000238096);(TF_binding_site|mE1_TFBS_HSA|FBsf0000350459);(TF_binding_site|mE1_TFBS_Trl|FBsf0000337537);(TF_binding_site|mE1_TFBS_Ubx|FBsf0000261881)
20	5	2L_12109373_SNP	FBgn0015797	Rab6	UPSTREAM	257	G	T	T	0.1282	5	34	-1.065	2.00545e-06	(TF_binding_site|BDTNP1_TFBS_dl|FBsf0000298252);(TF_binding_site|BDTNP1_TFBS_Med|FBsf0000278403);(TF_binding_site|mE1_TFBS_cad|FBsf0000241954);(TF_binding_site|mE1_TFBS_D|FBsf0000238096);(TF_binding_site|mE1_TFBS_HSA|FBsf0000350459);(TF_binding_site|mE1_TFBS_Trl|FBsf0000337537);(TF_binding_site|mE1_TFBS_Ubx|FBsf0000261881)
20	5	2L_12109402_SNP	FBgn0263234	Phae1	UPSTREAM	15	C	T	T	0.1282	5	34	-1.065	2.00545e-06	(TF_binding_site|BDTNP1_TFBS_dl|FBsf0000298252);(TF_binding_site|BDTNP1_TFBS_Med|FBsf0000278403);(TF_binding_site|mE1_TFBS_cad|FBsf0000241954);(TF_binding_site|mE1_TFBS_D|FBsf0000238096);(TF_binding_site|mE1_TFBS_HSA|FBsf0000350459);(TF_binding_site|mE1_TFBS_Trl|FBsf0000337537);(TF_binding_site|mE1_TFBS_Ubx|FBsf0000261881)
20	5	2L_12109402_SNP	FBgn0015797	Rab6	UPSTREAM	286	C	T	T	0.1282	5	34	-1.065	2.00545e-06	(TF_binding_site|BDTNP1_TFBS_dl|FBsf0000298252);(TF_binding_site|BDTNP1_TFBS_Med|FBsf0000278403);(TF_binding_site|mE1_TFBS_cad|FBsf0000241954);(TF_binding_site|mE1_TFBS_D|FBsf0000238096);(TF_binding_site|mE1_TFBS_HSA|FBsf0000350459);(TF_binding_site|mE1_TFBS_Trl|FBsf0000337537);(TF_binding_site|mE1_TFBS_Ubx|FBsf0000261881)
20	5	2L_12109702_SNP	FBgn0263234	Phae1	SYNONYMOUS_CODING	0	G	C	C	0.1053	4	34	-1.174	2.09818e-06	(TF_binding_site|mE1_TFBS_cad|FBsf0000241954);(TF_binding_site|mE1_TFBS_chinmo|FBsf0000207627);(TF_binding_site|mE1_TFBS_HSA|FBsf0000350459)
20	5	2L_12109702_SNP	FBgn0015797	Rab6	UPSTREAM	586	G	C	C	0.1053	4	34	-1.174	2.09818e-06	(TF_binding_site|mE1_TFBS_cad|FBsf0000241954);(TF_binding_site|mE1_TFBS_chinmo|FBsf0000207627);(TF_binding_site|mE1_TFBS_HSA|FBsf0000350459)
20	5	2L_12109876_SNP	FBgn0263234	Phae1	SYNONYMOUS_CODING	0	A	G	G	0.1026	4	35	-1.296	3.78601e-08	(TF_binding_site|mE1_TFBS_cad|FBsf0000241954);(TF_binding_site|mE1_TFBS_chinmo|FBsf0000207627);(TF_binding_site|mE1_TFBS_HSA|FBsf0000350459)
20	5	2L_12109876_SNP	FBgn0015797	Rab6	UPSTREAM	760	A	G	G	0.1026	4	35	-1.296	3.78601e-08	(TF_binding_site|mE1_TFBS_cad|FBsf0000241954);(TF_binding_site|mE1_TFBS_chinmo|FBsf0000207627);(TF_binding_site|mE1_TFBS_HSA|FBsf0000350459)
20	5	2L_12110462_SNP	FBgn0263234	Phae1	UTR_3_PRIME	0	A	G	G	0.1	4	36	-1.287	4.51975e-08	(TF_binding_site|mE1_TFBS_cad|FBsf0000241954);(TF_binding_site|mE1_TFBS_Trl|FBsf0000337538)
20	5	2L_12110462_SNP	FBgn0263235	Phae2	UPSTREAM	648	A	G	G	0.1	4	36	-1.287	4.51975e-08	(TF_binding_site|mE1_TFBS_cad|FBsf0000241954);(TF_binding_site|mE1_TFBS_Trl|FBsf0000337538)
20	5	2L_12110668_SNP	FBgn0263234	Phae1	DOWNSTREAM	4	A	T	T	0.1282	5	34	-1.079	1.27652e-06	(TF_binding_site|mE1_TFBS_Trl|FBsf0000337538)
20	5	2L_12110668_SNP	FBgn0263235	Phae2	UPSTREAM	442	A	T	T	0.1282	5	34	-1.079	1.27652e-06	(TF_binding_site|mE1_TFBS_Trl|FBsf0000337538)
20	5	2L_12110689_SNP	FBgn0263234	Phae1	DOWNSTREAM	25	T	A	A	0.1282	5	34	-1.092	8.77417e-07	(TF_binding_site|mE1_TFBS_Trl|FBsf0000337538)
20	5	2L_12110689_SNP	FBgn0263235	Phae2	UPSTREAM	421	T	A	A	0.1282	5	34	-1.092	8.77417e-07	(TF_binding_site|mE1_TFBS_Trl|FBsf0000337538)
20	5	2L_12110861_SNP	FBgn0263234	Phae1	DOWNSTREAM	197	G	A	A	0.1026	4	35	-1.309	2.04761e-08	-
20	5	2L_12110861_SNP	FBgn0263235	Phae2	UPSTREAM	249	G	A	A	0.1026	4	35	-1.309	2.04761e-08	-
20	5	2L_12111143_SNP	FBgn0263235	Phae2	UTR_5_PRIME	0	T	A	A	0.125	5	35	-1.075	1.36359e-06	(TF_binding_site|mE1_TFBS_cad|FBsf0000241955)
20	5	2L_12111143_SNP	FBgn0263234	Phae1	DOWNSTREAM	479	T	A	A	0.125	5	35	-1.075	1.36359e-06	(TF_binding_site|mE1_TFBS_cad|FBsf0000241955)
20	5	2L_12111459_SNP	FBgn0263235	Phae2	SYNONYMOUS_CODING	0	T	C	C	0.1	4	36	-1.287	4.51975e-08	(TF_binding_site|mE1_TFBS_cad|FBsf0000241955);(TF_binding_site|mE1_TFBS_HSA|FBsf0000350460)
20	5	2L_12111459_SNP	FBgn0263234	Phae1	DOWNSTREAM	795	T	C	C	0.1	4	36	-1.287	4.51975e-08	(TF_binding_site|mE1_TFBS_cad|FBsf0000241955);(TF_binding_site|mE1_TFBS_HSA|FBsf0000350460)
20	5	2L_12113206_SNP	FBgn0263235	Phae2	DOWNSTREAM	950	G	A	A	0.1	4	36	-1.287	4.51975e-08	-
20	5	2L_13386866_SNP	FBgn0032516	CG9293	SYNONYMOUS_CODING	0	C	T	T	0.1	4	36	-1.196	7.48663e-07	(TF_binding_site|BDTNP1_TFBS_dl|FBsf0000298478);(TF_binding_site|BDTNP1_TFBS_twi|FBsf0000201618);(TF_binding_site|mE1_TFBS_HSA|FBsf0000350804);(TF_binding_site|mE1_TFBS_sens|FBsf0000217546)
20	5	2L_13386866_SNP	FBgn0032517	CG7099	UPSTREAM	705	C	T	T	0.1	4	36	-1.196	7.48663e-07	(TF_binding_site|BDTNP1_TFBS_dl|FBsf0000298478);(TF_binding_site|BDTNP1_TFBS_twi|FBsf0000201618);(TF_binding_site|mE1_TFBS_HSA|FBsf0000350804);(TF_binding_site|mE1_TFBS_sens|FBsf0000217546)
20	5	2L_14254614_SNP	Intergenic	Intergenic			A	T	T	0.1111	4	32	-1.196	1.08168e-06	(TF_binding_site|BDTNP1_TFBS_twi|FBsf0000201678)
20	5	2L_14404022_SNP	FBgn0004858	elB	INTRON	0	C	T	T	0.1	4	36	-1.193	9.6336e-07	(regulatory_region|REDfly_CRMs|FBsf0000436237);(TF_binding_site|mE1_TFBS_cad|FBsf0000242128)
20	5	2L_14571098_SNP	Intergenic	Intergenic			A	G	G	0.1579	6	32	-0.9939	1.72164e-06	(TF_binding_site|BDTNP1_TFBS_da|FBsf0000322478);(TF_binding_site|BDTNP1_TFBS_dl|FBsf0000298689);(TF_binding_site|mE1_TFBS_cad|FBsf0000242148);(TF_binding_site|mE1_TFBS_HSA|FBsf0000351178)
20	5	2L_14577195_SNP	FBgn0266150	CR44856	DOWNSTREAM	98	G	A	A	0.125	5	35	-1.115	3.78304e-07	(TF_binding_site|BDTNP1_TFBS_da|FBsf0000322482);(TF_binding_site|BDTNP1_TFBS_dl|FBsf0000298691);(TF_binding_site|BDTNP1_TFBS_Med|FBsf0000278611);(TF_binding_site|BDTNP1_TFBS_prd|FBsf0000275073);(TF_binding_site|BDTNP1_TFBS_slp1|FBsf0000271853);(TF_binding_site|BDTNP1_TFBS_twi|FBsf0000201740);(TF_binding_site|mE1_TFBS_HSA|FBsf0000351180);(TF_binding_site|mE1_TFBS_sens|FBsf0000217719)
20	5	2L_16504330_SNP	FBgn0032586	Tpr2	INTRON	0	A	T	T	0.3784	14	23	-0.7477	1.69649e-06	-
20	5	2L_3297845_SNP	FBgn0031516	CG9663	INTRON	0	T	A	A	0.1111	4	32	-1.169	2.00243e-06	-
20	5	2L_3299448_SNP	FBgn0031516	CG9663	INTRON	0	A	C	C	0.1282	5	34	-1.105	3.42472e-07	(TF_binding_site|mE1_TFBS_HSA|FBsf0000344926);(TF_binding_site|mE1_TFBS_HSA|FBsf0000344927);(TF_binding_site|mE1_TFBS_zfh1|FBsf0000334460)
20	5	2L_681597_INS	FBgn0000497	ds	INTRON	0	CC	C	C	0.1053	4	34	-1.168	2.0382e-06	-
20	5	2L_683533_SNP	FBgn0000497	ds	INTRON	0	A	G	G	0.15	6	34	-1.007	6.69011e-07	-
20	5	2L_685568_DEL	FBgn0000497	ds	INTRON	0	A	AAGAAA	AAGAAA	0.1026	4	35	-1.299	3.12006e-08	-
20	5	2L_882829_SNP	FBgn0031292	CG15824	SYNONYMOUS_CODING	0	T	C	C	0.1026	4	35	-1.211	4.91373e-07	(TF_binding_site|BDTNP1_TFBS_sna|FBsf0000268168);(TF_binding_site|mE1_TFBS_cad|FBsf0000241070);(TF_binding_site|mE1_TFBS_HSA|FBsf0000344204)
20	5	2R_16080439_INS	Intergenic	Intergenic			CC	C	C	0.1	4	36	-1.186	9.36591e-07	-
20	5	2R_16912739_INS	FBgn0034576	CG9350	INTRON	0	TAAGTT	T	T	0.1515	5	28	-1.084	9.72694e-07	(TF_binding_site|BDTNP1_TFBS_dl|FBsf0000303583);(TF_binding_site|BDTNP1_TFBS_Med|FBsf0000281093);(TF_binding_site|mE1_TFBS_cad|FBsf0000247138);(TF_binding_site|mE1_TFBS_HSA|FBsf0000358913);(TF_binding_site|mE1_TFBS_sens|FBsf0000229122);(TF_binding_site|mE1_TFBS_Ubx|FBsf0000263163);(TF_binding_site|mE1_TFBS_zfh1|FBsf0000334736)
20	5	2R_16912739_INS	FBgn0050296	RIC-3	DOWNSTREAM	317	TAAGTT	T	T	0.1515	5	28	-1.084	9.72694e-07	(TF_binding_site|BDTNP1_TFBS_dl|FBsf0000303583);(TF_binding_site|BDTNP1_TFBS_Med|FBsf0000281093);(TF_binding_site|mE1_TFBS_cad|FBsf0000247138);(TF_binding_site|mE1_TFBS_HSA|FBsf0000358913);(TF_binding_site|mE1_TFBS_sens|FBsf0000229122);(TF_binding_site|mE1_TFBS_Ubx|FBsf0000263163);(TF_binding_site|mE1_TFBS_zfh1|FBsf0000334736)
20	5	3L_12304028_SNP	FBgn0265455	CG44355	INTRON	0	T	C	C	0.125	5	35	-1.214	3.9288e-09	-
20	5	3L_12720386_SNP	Intergenic	Intergenic			C	A	A	0.1316	5	33	-1.109	2.61724e-07	(TF_binding_site|BDTNP1_TFBS_twi|FBsf0000203624);(TF_binding_site|mE1_TFBS_HSA|FBsf0000364676)
20	5	3L_13500082_SNP	FBgn0036374	Spt20	NON_SYNONYMOUS_CODING	0	T	A	A	0.1538	6	33	-1.025	4.05107e-07	(TF_binding_site|mE1_TFBS_cad|FBsf0000244939);(TF_binding_site|mE1_TFBS_chinmo|FBsf0000210204)
20	5	3L_14424505_SNP	FBgn0087007	bbg	INTRON	0	C	T	C	0.1	4	36	-1.302	2.14906e-08	-
20	5	3L_14424533_SNP	FBgn0087007	bbg	INTRON	0	G	T	G	0.125	5	35	-1.205	7.2211e-09	-
20	5	3L_14424648_SNP	FBgn0087007	bbg	INTRON	0	T	C	T	0.1282	5	34	-1.194	1.26478e-08	-
20	5	3L_1562507_SNP	FBgn0035235	CG7879	NON_SYNONYMOUS_CODING	0	T	C	C	0.1053	4	34	-1.209	7.07456e-07	(TF_binding_site|BDTNP1_TFBS_da|FBsf0000325773);(TF_binding_site|BDTNP1_TFBS_sna|FBsf0000269003);(TF_binding_site|mE1_TFBS_chinmo|FBsf0000209545);(TF_binding_site|mE1_TFBS_HSA|FBsf0000361164)
20	5	3L_18087015_SNP	FBgn0036773	CG13698	INTRON	0	T	C	C	0.1	4	36	-1.204	7.09886e-07	-
20	5	3L_18092167_SNP	FBgn0036773	CG13698	INTRON	0	A	G	G	0.1053	4	34	-1.228	3.84401e-07	-
20	5	3L_18092632_SNP	FBgn0036773	CG13698	INTRON	0	A	C	C	0.1111	4	32	-1.178	1.81839e-06	-
20	5	3L_18092837_SNP	FBgn0036773	CG13698	INTRON	0	T	C	C	0.1	4	36	-1.204	7.09886e-07	-
20	5	3L_18096925_SNP	FBgn0036773	CG13698	INTRON	0	A	T	T	0.1026	4	35	-1.226	3.4295e-07	-
20	5	3L_18097384_SNP	FBgn0036773	CG13698	INTRON	0	T	A	A	0.1	4	36	-1.204	7.09886e-07	-
20	5	3L_18098509_SNP	FBgn0036773	CG13698	INTRON	0	T	C	C	0.1053	4	34	-1.228	3.84401e-07	(TF_binding_site|BDTNP1_TFBS_dl|FBsf0000308320);(TF_binding_site|mE1_TFBS_HSA|FBsf0000366430)
20	5	3L_18100565_SNP	FBgn0036774	mRpS26	UTR_3_PRIME	0	A	T	T	0.1	4	36	-1.204	7.09886e-07	-
20	5	3L_18100565_SNP	FBgn0036775	CG5147	DOWNSTREAM	383	A	T	T	0.1	4	36	-1.204	7.09886e-07	-
20	5	3L_22648637_SNP	Intergenic	Intergenic			A	G	A	0.3077	12	27	-0.741	2.06086e-06	(TF_binding_site|mE1_TFBS_cad|FBsf0000245664);(TF_binding_site|mE1_TFBS_chinmo|FBsf0000210606);(TF_binding_site|mE1_TFBS_HSA|FBsf0000367940)
20	5	3L_3536953_SNP	FBgn0005640	Eip63E	INTRON	0	A	G	G	0.1282	5	34	-1.146	7.46888e-08	-
20	5	3L_4410589_SNP	FBgn0035542	DOR	INTRON	0	G	T	T	0.1026	4	35	-1.309	1.88363e-08	(TF_binding_site|BDTNP1_TFBS_dl|FBsf0000305610);(TF_binding_site|BDTNP1_TFBS_Med|FBsf0000282180);(TF_binding_site|mE1_TFBS_cad|FBsf0000244228)
20	5	3L_4410596_SNP	FBgn0035542	DOR	INTRON	0	A	T	T	0.1026	4	35	-1.309	1.88363e-08	(TF_binding_site|BDTNP1_TFBS_dl|FBsf0000305610);(TF_binding_site|BDTNP1_TFBS_Med|FBsf0000282180);(TF_binding_site|mE1_TFBS_cad|FBsf0000244228)
20	5	3L_4410601_SNP	FBgn0035542	DOR	INTRON	0	C	T	T	0.1026	4	35	-1.309	1.88363e-08	(TF_binding_site|BDTNP1_TFBS_dl|FBsf0000305610);(TF_binding_site|BDTNP1_TFBS_Med|FBsf0000282180);(TF_binding_site|mE1_TFBS_cad|FBsf0000244228)
20	5	3L_6898075_SNP	Intergenic	Intergenic			T	A	A	0.1026	4	35	-1.214	5.05816e-07	(TF_binding_site|BDTNP1_TFBS_da|FBsf0000326279);(TF_binding_site|BDTNP1_TFBS_dl|FBsf0000305991);(TF_binding_site|BDTNP1_TFBS_Med|FBsf0000282362);(TF_binding_site|BDTNP1_TFBS_twi|FBsf0000203121);(TF_binding_site|mE1_TFBS_Trl|FBsf0000339591)
20	5	3L_713275_SNP	FBgn0266960	CR45411	DOWNSTREAM	941	T	C	C	0.1026	4	35	-1.224	3.73942e-07	(TF_binding_site|mE1_TFBS_sens|FBsf0000222268)
20	5	3L_7600773_SNP	FBgn0035802	CG33275	INTRON	0	C	A	A	0.125	5	35	-1.141	1.15973e-07	(TF_binding_site|BDTNP1_TFBS_twi|FBsf0000203159)
20	5	3L_9201174_SNP	FBgn0035968	Slc45-1	UPSTREAM	11	G	C	C	0.125	5	35	-1.072	1.51005e-06	-
20	5	3L_9273273_SNP	FBgn0264000	GluRIB	INTRON	0	A	G	G	0.1026	4	35	-1.169	1.8781e-06	(TF_binding_site|BDTNP1_TFBS_da|FBsf0000326482);(TF_binding_site|BDTNP1_TFBS_dl|FBsf0000306435);(TF_binding_site|BDTNP1_TFBS_hb|FBsf0000291279);(TF_binding_site|BDTNP1_TFBS_Med|FBsf0000282586);(TF_binding_site|mE1_TFBS_HSA|FBsf0000363581)
20	5	3R_11895641_SNP	FBgn0026059	Mhcl	SYNONYMOUS_CODING	0	T	G	T	0.1176	4	30	-1.185	1.40264e-06	(TF_binding_site|mE1_TFBS_cad|FBsf0000248491)
20	5	3R_17031610_SNP	FBgn0264357	SNF4Agamma	INTRON	0	G	A	A	0.1081	4	33	-1.177	1.49849e-06	(TF_binding_site|BDTNP1_TFBS_da|FBsf0000329960);(TF_binding_site|BDTNP1_TFBS_dl|FBsf0000313109);(TF_binding_site|mE1_TFBS_cad|FBsf0000248902);(TF_binding_site|mE1_TFBS_HSA|FBsf0000373693)
20	5	3R_17279245_SNP	Intergenic	Intergenic			C	A	C	0.1579	6	32	-1.005	1.19243e-06	(TF_binding_site|BDTNP1_TFBS_prd|FBsf0000276726);(TF_binding_site|mE1_TFBS_HSA|FBsf0000373787)
20	5	3R_24215953_SNP	Intergenic	Intergenic			C	G	G	0.1081	4	33	-1.185	1.62534e-06	-
20	5	3R_26071033_SNP	FBgn0039759	CG9733	INTRON	0	T	G	G	0.1538	6	33	-1.02	3.44854e-07	-
20	5	3R_7071743_SNP	FBgn0037891	CG5214	INTRON	0	A	C	C	0.1282	5	34	-1.088	5.85456e-07	(TF_binding_site|mE1_TFBS_cad|FBsf0000248122);(TF_binding_site|mE1_TFBS_HSA|FBsf0000370533)
20	5	X_12833616_SNP	FBgn0086675	fne	INTRON	0	T	C	T	0.1842	7	31	-0.9887	1.52191e-07	(TF_binding_site|BDTNP1_TFBS_da|FBsf0000332513);(TF_binding_site|BDTNP1_TFBS_dl|FBsf0000318721);(TF_binding_site|BDTNP1_TFBS_Med|FBsf0000288563);(TF_binding_site|BDTNP1_TFBS_twi|FBsf0000205849)
20	5	X_14816046_SNP	FBgn0264078	Flo2	INTRON	0	A	T	T	0.1	4	36	-1.196	7.48663e-07	-
20	5	X_14816046_SNP	FBgn0030598	CG9503	INTRON	0	A	T	T	0.1	4	36	-1.196	7.48663e-07	-
20	5	X_14816056_SNP	FBgn0030598	CG9503	INTRON	0	G	A	A	0.1	4	36	-1.196	7.48663e-07	-
20	5	X_14816056_SNP	FBgn0264078	Flo2	INTRON	0	G	A	A	0.1	4	36	-1.196	7.48663e-07	-
20	5	X_17761011_SNP	FBgn0259168	mnb	DOWNSTREAM	590	G	T	T	0.1026	4	35	-1.183	1.37696e-06	(TF_binding_site|mE1_TFBS_zfh1|FBsf0000335256)
20	5	X_17779253_SNP	FBgn0259168	mnb	INTRON	0	A	G	G	0.1	4	36	-1.193	9.6336e-07	(TF_binding_site|BDTNP1_TFBS_da|FBsf0000332916);(TF_binding_site|BDTNP1_TFBS_dl|FBsf0000319963);(TF_binding_site|BDTNP1_TFBS_gt|FBsf0000294952);(TF_binding_site|BDTNP1_TFBS_hb|FBsf0000292096);(TF_binding_site|BDTNP1_TFBS_Med|FBsf0000289014);(TF_binding_site|BDTNP1_TFBS_sna|FBsf0000270394);(TF_binding_site|BDTNP1_TFBS_twi|FBsf0000263609);(TF_binding_site|mE1_TFBS_cad|FBsf0000243616);(TF_binding_si…
20	5	X_17779253_SNP	FBgn0030881	CG12985	UTR_3_PRIME	0	A	G	G	0.1	4	36	-1.193	9.6336e-07	(TF_binding_site|BDTNP1_TFBS_da|FBsf0000332916);(TF_binding_site|BDTNP1_TFBS_dl|FBsf0000319963);(TF_binding_site|BDTNP1_TFBS_gt|FBsf0000294952);(TF_binding_site|BDTNP1_TFBS_hb|FBsf0000292096);(TF_binding_site|BDTNP1_TFBS_Med|FBsf0000289014);(TF_binding_site|BDTNP1_TFBS_sna|FBsf0000270394);(TF_binding_site|BDTNP1_TFBS_twi|FBsf0000263609);(TF_binding_site|mE1_TFBS_cad|FBsf0000243616);(TF_binding_si…
20	5	X_17779255_SNP	FBgn0030881	CG12985	UTR_3_PRIME	0	G	A	A	0.1026	4	35	-1.215	5.11859e-07	(TF_binding_site|BDTNP1_TFBS_da|FBsf0000332916);(TF_binding_site|BDTNP1_TFBS_dl|FBsf0000319963);(TF_binding_site|BDTNP1_TFBS_gt|FBsf0000294952);(TF_binding_site|BDTNP1_TFBS_hb|FBsf0000292096);(TF_binding_site|BDTNP1_TFBS_Med|FBsf0000289014);(TF_binding_site|BDTNP1_TFBS_sna|FBsf0000270394);(TF_binding_site|BDTNP1_TFBS_twi|FBsf0000263609);(TF_binding_site|mE1_TFBS_cad|FBsf0000243616);(TF_binding_si…
20	5	X_17779255_SNP	FBgn0259168	mnb	INTRON	0	G	A	A	0.1026	4	35	-1.215	5.11859e-07	(TF_binding_site|BDTNP1_TFBS_da|FBsf0000332916);(TF_binding_site|BDTNP1_TFBS_dl|FBsf0000319963);(TF_binding_site|BDTNP1_TFBS_gt|FBsf0000294952);(TF_binding_site|BDTNP1_TFBS_hb|FBsf0000292096);(TF_binding_site|BDTNP1_TFBS_Med|FBsf0000289014);(TF_binding_site|BDTNP1_TFBS_sna|FBsf0000270394);(TF_binding_site|BDTNP1_TFBS_twi|FBsf0000263609);(TF_binding_site|mE1_TFBS_cad|FBsf0000243616);(TF_binding_si…
20	5	X_17781764_SNP	FBgn0030880	CG6788	UPSTREAM	446	G	A	A	0.1	4	36	-1.193	9.6336e-07	(TF_binding_site|BDTNP1_TFBS_dl|FBsf0000319965);(TF_binding_site|BDTNP1_TFBS_Med|FBsf0000289016);(TF_binding_site|mE1_TFBS_bab1|FBsf0000215096);(TF_binding_site|mE1_TFBS_h|FBsf0000258093);(TF_binding_site|mE1_TFBS_HSA|FBsf0000349032);(TF_binding_site|mE1_TFBS_Trl|FBsf0000343164);(TF_binding_site|mE1_TFBS_Ubx|FBsf0000262222)
20	5	X_17781764_SNP	FBgn0259168	mnb	UPSTREAM	509	G	A	A	0.1	4	36	-1.193	9.6336e-07	(TF_binding_site|BDTNP1_TFBS_dl|FBsf0000319965);(TF_binding_site|BDTNP1_TFBS_Med|FBsf0000289016);(TF_binding_site|mE1_TFBS_bab1|FBsf0000215096);(TF_binding_site|mE1_TFBS_h|FBsf0000258093);(TF_binding_site|mE1_TFBS_HSA|FBsf0000349032);(TF_binding_site|mE1_TFBS_Trl|FBsf0000343164);(TF_binding_site|mE1_TFBS_Ubx|FBsf0000262222)
20	5	X_5036762_SNP	FBgn0029746	CG15465	INTRON	0	C	T	T	0.1944	7	29	-0.9807	3.92556e-07	(TF_binding_site|BDTNP1_TFBS_dl|FBsf0000316715)
20	5	X_5036762_SNP	FBgn0266098	rg	INTRON	0	C	T	T	0.1944	7	29	-0.9807	3.92556e-07	(TF_binding_site|BDTNP1_TFBS_dl|FBsf0000316715)
20	5	X_6505479_SNP	FBgn0029881	pigs	INTRON	0	T	G	G	0.175	7	33	-0.9985	1.16072e-07	-
20	5	X_7051609_DEL	FBgn0029939	CG9650	INTRON	0	T	TT	TT	0.1579	6	32	-1.012	5.05483e-07	(TF_binding_site|BDTNP1_TFBS_dl|FBsf0000317290)
20	5	X_7490676_INS	Intergenic	Intergenic			CATAGC	C	C	0.1667	6	30	-1.016	9.84027e-07	(regulatory_region|REDfly_CRMs|FBsf0000435155);(TF_binding_site|mE1_TFBS_HSA|FBsf0000380293);(TF_binding_site|mE1_TFBS_Kr|FBsf0000253921);(TF_binding_site|mE1_TFBS_sens|FBsf0000220019)
20	5	X_7490743_SNP	Intergenic	Intergenic			A	C	C	0.2	8	32	-0.9055	7.20913e-07	(regulatory_region|REDfly_CRMs|FBsf0000435155);(TF_binding_site|mE1_TFBS_HSA|FBsf0000380293);(TF_binding_site|mE1_TFBS_Kr|FBsf0000253921);(TF_binding_site|mE1_TFBS_sens|FBsf0000220019)
20	5	X_7923039_SNP	Intergenic	Intergenic			A	G	G	0.1081	4	33	-1.252	1.96475e-07	-
20	6	2R_15409516_SNP	FBgn0003435	sm	UTR_3_PRIME	0	T	G	G	0.1081	4	33	-0.9492	1.20322e-06	-
20	6	3L_883479_SNP	FBgn0052479	CG32479	INTRON	0	T	C	C	0.1538	6	33	-0.8051	7.0123e-07	(TF_binding_site|mE1_TFBS_HSA|FBsf0000360915);(TF_binding_site|mE1_TFBS_Trl|FBsf0000339322)
20	7	X_6427661_SNP	FBgn0014026	RpL7A	UPSTREAM	280	T	C	C	0.4848	16	17	0.5976	1.58866e-06	(TF_binding_site|BDTNP1_TFBS_dl|FBsf0000317033);(TF_binding_site|BDTNP1_TFBS_Med|FBsf0000287897);(TF_binding_site|mE1_TFBS_bab1|FBsf0000214964);(TF_binding_site|mE1_TFBS_cad|FBsf0000242934);(TF_binding_site|mE1_TFBS_HSA|FBsf0000379871);(TF_binding_site|mE1_TFBS_HSA|FBsf0000379872);(TF_binding_site|mE1_TFBS_run|FBsf0000336053);(TF_binding_site|mE1_TFBS_sens|FBsf0000219845);(TF_binding_site|mE1_TFB…
20	7	X_6427661_SNP	FBgn0000524	dx	UPSTREAM	371	T	C	C	0.4848	16	17	0.5976	1.58866e-06	(TF_binding_site|BDTNP1_TFBS_dl|FBsf0000317033);(TF_binding_site|BDTNP1_TFBS_Med|FBsf0000287897);(TF_binding_site|mE1_TFBS_bab1|FBsf0000214964);(TF_binding_site|mE1_TFBS_cad|FBsf0000242934);(TF_binding_site|mE1_TFBS_HSA|FBsf0000379871);(TF_binding_site|mE1_TFBS_HSA|FBsf0000379872);(TF_binding_site|mE1_TFBS_run|FBsf0000336053);(TF_binding_site|mE1_TFBS_sens|FBsf0000219845);(TF_binding_site|mE1_TFB…
20	8	3R_9238395_SNP	FBgn0041711	yellow-e	INTRON	0	C	G	C	0.25	10	30	0.5914	4.60727e-07	-
21	1	3L_16670982_SNP	FBgn0063485	Lasp	UTR_3_PRIME	0	C	A	C	0.3611	13	23	-1.881	6.41156e-07	-
21	1	3L_16670982_SNP	FBgn0264605	CG43954	SYNONYMOUS_CODING	0	C	A	C	0.3611	13	23	-1.881	6.41156e-07	-
21	1	3L_3233330_SNP	FBgn0035424	CG11505	UTR_3_PRIME	0	T	A	A	0.3846	15	24	1.697	1.96234e-06	-
21	1	4_980922_SNP	FBgn0264822	CR44030	INTRON	0	C	G	G	0.3429	12	23	1.968	1.76742e-07	(TF_binding_site|mE1_TFBS_cad|FBsf0000245723);(TF_binding_site|mE1_TFBS_HSA|FBsf0000377552);(TF_binding_site|mE1_TFBS_kn|FBsf0000336151);(transposable_element|FlyBase|FBti0020438)
21	1	4_980922_SNP	FBgn0266728	CR45201	UPSTREAM	862	C	G	G	0.3429	12	23	1.968	1.76742e-07	(TF_binding_site|mE1_TFBS_cad|FBsf0000245723);(TF_binding_site|mE1_TFBS_HSA|FBsf0000377552);(TF_binding_site|mE1_TFBS_kn|FBsf0000336151);(transposable_element|FlyBase|FBti0020438)
21	1	4_990885_SNP	FBgn0039932	fuss	INTRON	0	C	T	T	0.3714	13	22	1.806	2.04959e-06	-
21	1	X_12456683_SNP	FBgn0264542	CG43921	INTRON	0	T	C	C	0.4872	19	20	1.628	1.42101e-06	-
21	2	2L_12494023_SNP	FBgn0259176	bun	INTRON	0	T	G	G	0.2895	11	27	-1.333	1.9305e-06	-
21	3	2L_14000372_SNP	FBgn0003255	rk	INTRON	0	T	C	C	0.4722	17	19	-1.025	1.40487e-07	-
21	3	2L_15516747_DEL	FBgn0266158	CR44864	UPSTREAM	21	G	GAA	GAA	0.4054	15	22	-0.9575	1.62142e-06	-
21	3	2R_10484281_SNP	FBgn0019938	RpI1	INTRON	0	G	T	G	0.4	16	24	0.9235	1.94015e-06	-
21	3	3L_5867720_SNP	FBgn0035642	CG18586	NON_SYNONYMOUS_CODING	0	G	A	A	0.375	15	25	-0.9351	1.89432e-06	(TF_binding_site|mE1_TFBS_sens|FBsf0000223128)
21	3	X_578351_SNP	Intergenic	Intergenic			T	C	T	0.3846	15	24	0.9428	1.87361e-06	-
21	5	3L_12058934_SNP	FBgn0041096	rols	UPSTREAM	975	G	A	A	0.1795	7	32	-0.9899	8.30691e-07	-
21	5	3R_12352332_SNP	FBgn0259244	CG42342	INTRON	0	T	C	T	0.475	19	21	0.7395	1.42473e-06	(TF_binding_site|BDTNP1_TFBS_bcd|FBsf0000334258);(TF_binding_site|BDTNP1_TFBS_da|FBsf0000329482);(TF_binding_site|BDTNP1_TFBS_dl|FBsf0000312130);(TF_binding_site|BDTNP1_TFBS_hb|FBsf0000292550);(TF_binding_site|BDTNP1_TFBS_twi|FBsf0000265184);(TF_binding_site|mE1_TFBS_cad|FBsf0000248536);(TF_binding_site|mE1_TFBS_HSA|FBsf0000372255)
21	6	3L_10168567_SNP	FBgn0052057	dpr10	INTRON	0	A	C	C	0.3421	13	25	0.7868	1.48656e-06	-
21	6	3L_10168585_SNP	FBgn0052057	dpr10	INTRON	0	A	G	G	0.3333	13	26	0.7727	2.16131e-06	-
21	7	3L_19512034_SNP	FBgn0036878	Cpr76Ba	UPSTREAM	602	T	G	G	0.25	9	27	0.8365	2.65045e-07	-
21	7	3L_19512034_SNP	FBgn0036879	Cpr76Bb	UPSTREAM	715	T	G	G	0.25	9	27	0.8365	2.65045e-07	-
21	7	3L_3510663_SNP	FBgn0259224	CG42324	UTR_3_PRIME	0	C	A	C	0.375	15	25	0.6842	1.44075e-06	-
21	7	3L_3510663_SNP	FBgn0001254	ImpE2	DOWNSTREAM	311	C	A	C	0.375	15	25	0.6842	1.44075e-06	-
21	8	3L_11185546_SNP	FBgn0036144	GlcAT-P	INTRON	0	A	T	T	0.1	4	36	-1.04	1.3244e-06	-
21	8	3L_11185729_SNP	FBgn0036144	GlcAT-P	INTRON	0	C	T	T	0.1026	4	35	-1.056	8.21012e-07	-
21	8	3L_2888832_SNP	FBgn0035379	spz5	INTRON	0	C	T	T	0.1538	6	33	-0.8958	5.8471e-07	-
21	9	2R_16241794_SNP	FBgn0034507	CG11192	SYNONYMOUS_CODING	0	G	A	G	0.2308	9	30	-0.6949	8.88769e-07	(TF_binding_site|mE1_TFBS_cad|FBsf0000247084)
21	9	2R_7369906_SNP	FBgn0001269	inv	INTRON	0	C	A	A	0.3684	14	24	-0.5766	1.5179e-06	-
21	9	X_20039102_SNP	Intergenic	Intergenic			C	T	T	0.2821	11	28	-0.6812	1.51641e-07	-
21	9	X_20039491_SNP	Intergenic	Intergenic			G	C	C	0.2895	11	27	-0.6534	9.22351e-07	-
21	10	2R_15841489_SNP	FBgn0265833	CG44622	INTRON	0	A	T	A	0.3947	15	23	-0.5384	1.81213e-06	-
21	10	2R_15841621_SNP	FBgn0265833	CG44622	NON_SYNONYMOUS_CODING	0	A	G	A	0.3684	14	24	-0.5496	1.41956e-06	-
21	10	3L_12213025_SNP	FBgn0260941	app	INTRON	0	G	A	A	0.2105	8	30	-0.6627	7.31907e-07	-
21	10	3L_3172894_SNP	FBgn0035410	CG14964	UTR_3_PRIME	0	A	G	A	0.4615	18	21	-0.519	2.03491e-06	-
21	10	3L_3172894_SNP	FBgn0035409	CG14963	UPSTREAM	349	A	G	A	0.4615	18	21	-0.519	2.03491e-06	-
21	11	2R_16830053_SNP	Intergenic	Intergenic			A	C	C	0.3243	12	25	0.5231	1.08712e-06	-
21	11	2R_19882150_SNP	FBgn0034951	CG3860	UTR_5_PRIME	0	G	T	T	0.3333	13	26	-0.5031	1.3268e-06	-
21	11	2R_19882150_SNP	FBgn0053519	Unc-89	DOWNSTREAM	916	G	T	T	0.3333	13	26	-0.5031	1.3268e-06	-
22	1	2L_10587476_SNP	FBgn0051721	Trim9	INTRON	0	A	T	T	0.1053	4	34	-2.963	1.02892e-06	-
22	1	2L_1070603_SNP	FBgn0003310	S	INTRON	0	G	T	T	0.2308	9	30	-2.079	1.55434e-06	(TF_binding_site|mE1_TFBS_cad|FBsf0000241079);(TF_binding_site|mE1_TFBS_cnc|FBsf0000206167);(TF_binding_site|mE1_TFBS_HSA|FBsf0000344264)
22	1	2L_10789743_SNP	FBgn0051869	CG31869	INTRON	0	A	C	C	0.1515	5	28	-2.706	1.7465e-06	-
22	1	2L_10789743_SNP	FBgn0051870	CG31870	UPSTREAM	479	A	C	C	0.1515	5	28	-2.706	1.7465e-06	-
22	1	2L_15497322_SNP	Intergenic	Intergenic			A	C	C	0.1026	4	35	-2.975	4.28976e-07	-
22	1	2L_15578072_SNP	FBgn0028370	kek3	INTRON	0	A	T	T	0.125	5	35	-2.672	1.54769e-06	-
22	1	2L_15791257_SNP	Intergenic	Intergenic			A	C	C	0.1	4	36	-2.994	4.20614e-07	-
22	1	2L_15791287_SNP	Intergenic	Intergenic			T	A	A	0.1	4	36	-2.994	4.20614e-07	-
22	1	2L_16151927_SNP	Intergenic	Intergenic			T	C	C	0.1	4	36	-2.994	4.20614e-07	-
22	1	2L_16332642_SNP	FBgn0028899	CG31817	NON_SYNONYMOUS_CODING	0	T	A	A	0.1	4	36	-2.994	4.20614e-07	(TF_binding_site|mE1_TFBS_sens|FBsf0000217886)
22	1	2L_16332660_SNP	FBgn0028899	CG31817	SYNONYMOUS_CODING	0	T	C	C	0.1053	4	34	-3.004	3.39792e-07	-
22	1	2L_16332669_SNP	FBgn0028899	CG31817	SYNONYMOUS_CODING	0	G	C	C	0.1026	4	35	-3.022	2.48232e-07	-
22	1	2L_16376542_INS	Intergenic	Intergenic			AA	A	A	0.1	4	36	-2.994	4.20614e-07	-
22	1	2L_17458313_SNP	FBgn0032637	CG5050	INTRON	0	G	A	A	0.1026	4	35	-3.014	2.93273e-07	(transposable_element|FlyBase|FBti0061483)
22	1	2L_17458313_SNP	FBgn0032639	CG18563	UPSTREAM	269	G	A	A	0.1026	4	35	-3.014	2.93273e-07	(transposable_element|FlyBase|FBti0061483)
22	1	2L_17460596_SNP	FBgn0000183	BicD	DOWNSTREAM	221	T	A	A	0.1111	4	32	-2.972	1.13741e-06	-
22	1	2L_18419071_SNP	Intergenic	Intergenic			T	A	A	0.1026	4	35	-2.936	1.79305e-06	-
22	1	2L_18422627_SNP	Intergenic	Intergenic			C	T	T	0.1351	5	32	-2.747	5.40061e-07	-
22	1	2L_19224022_SNP	Intergenic	Intergenic			T	C	C	0.1	4	36	-2.994	4.20614e-07	-
22	1	2L_19600891_SNP	FBgn0000464	Lar	UTR_5_PRIME	0	C	T	T	0.1143	4	31	-3.048	1.79406e-07	-
22	1	2L_19600891_SNP	FBgn0266313	CR44978	INTRON	0	C	T	T	0.1143	4	31	-3.048	1.79406e-07	-
22	1	2L_5045150_SNP	FBgn0264742	CG44000	INTRON	0	A	T	T	0.1026	4	35	-3.007	3.3796e-07	(TF_binding_site|BDTNP1_TFBS_dl|FBsf0000296726);(TF_binding_site|mE1_TFBS_HSA|FBsf0000345512)
22	1	2L_5045150_SNP	FBgn0264743	CG44001	INTRON	0	A	T	T	0.1026	4	35	-3.007	3.3796e-07	(TF_binding_site|BDTNP1_TFBS_dl|FBsf0000296726);(TF_binding_site|mE1_TFBS_HSA|FBsf0000345512)
22	1	2L_5045150_SNP	FBgn0053995	CG33995	INTRON	0	A	T	T	0.1026	4	35	-3.007	3.3796e-07	(TF_binding_site|BDTNP1_TFBS_dl|FBsf0000296726);(TF_binding_site|mE1_TFBS_HSA|FBsf0000345512)
22	1	2L_5045150_SNP	FBgn0031673	CG31650	UPSTREAM	438	A	T	T	0.1026	4	35	-3.007	3.3796e-07	(TF_binding_site|BDTNP1_TFBS_dl|FBsf0000296726);(TF_binding_site|mE1_TFBS_HSA|FBsf0000345512)
22	1	2L_7068229_SNP	FBgn0031887	CG11289	NON_SYNONYMOUS_CODING	0	C	T	T	0.1026	4	35	-3.014	3.07975e-07	(TF_binding_site|mE1_TFBS_sens|FBsf0000216561)
22	1	2L_7465829_SNP	FBgn0031918	CG6055	UPSTREAM	714	A	C	C	0.25	10	30	-2.026	6.92474e-07	-
22	1	2L_8129867_SNP	FBgn0031988	CG8668	INTRON	0	A	G	G	0.1081	4	33	-2.977	4.24842e-07	-
22	1	2L_8130409_SNP	FBgn0031988	CG8668	INTRON	0	A	G	G	0.1	4	36	-2.994	4.20614e-07	-
22	1	2L_8131794_SNP	FBgn0031988	CG8668	SYNONYMOUS_CODING	0	T	C	C	0.1026	4	35	-2.99	4.89902e-07	(TF_binding_site|BDTNP1_TFBS_da|FBsf0000321886);(TF_binding_site|mE1_TFBS_HSA|FBsf0000346655)
22	1	2L_9692345_SNP	FBgn0000273	Pka-C1	INTRON	0	A	G	G	0.1	4	36	-2.994	4.20614e-07	-
22	1	2L_9884468_SNP	FBgn0032151	nAChRalpha6	INTRON	0	A	G	G	0.1	4	36	-2.994	4.20614e-07	-
22	1	2L_9885189_SNP	FBgn0032151	nAChRalpha6	INTRON	0	A	C	C	0.1	4	36	-2.994	4.20614e-07	-
22	1	2R_10309281_SNP	FBgn0033936	CG17386	SYNONYMOUS_CODING	0	G	A	A	0.1	4	36	-2.994	4.20614e-07	(TF_binding_site|mE1_TFBS_cad|FBsf0000246643);(TF_binding_site|mE1_TFBS_chinmo|FBsf0000211288)
22	1	2R_10311367_SNP	FBgn0033936	CG17386	UTR_3_PRIME	0	T	A	A	0.1	4	36	-2.994	4.20614e-07	(TF_binding_site|mE1_TFBS_cad|FBsf0000246643)
22	1	2R_10313935_SNP	FBgn0013725	phyl	DOWNSTREAM	906	A	G	G	0.1	4	36	-2.994	4.20614e-07	-
22	1	2R_10314412_SNP	FBgn0013725	phyl	DOWNSTREAM	429	T	G	G	0.1026	4	35	-2.975	4.28976e-07	-
22	1	2R_10314485_SNP	FBgn0013725	phyl	DOWNSTREAM	356	C	A	A	0.1053	4	34	-2.977	4.86596e-07	-
22	1	2R_10314496_SNP	FBgn0013725	phyl	DOWNSTREAM	345	T	A	A	0.1081	4	33	-2.993	4.10974e-07	-
22	1	2R_10498141_SNP	FBgn0026427	Su_var_2-HP2	NON_SYNONYMOUS_CODING	0	C	G	C	0.1026	4	35	-3.018	2.39409e-07	(TF_binding_site|mE1_TFBS_HSA|FBsf0000356764)
22	1	2R_12329434_SNP	Intergenic	Intergenic			T	C	C	0.1111	4	32	-2.984	7.93013e-07	-
22	1	2R_12329475_SNP	Intergenic	Intergenic			C	T	C	0.1	4	36	-2.994	4.20614e-07	-
22	1	2R_13106429_DEL	FBgn0265487	mbl	INTRON	0	T	TTATTG	TTATTG	0.1081	4	33	-3.074	1.01149e-07	-
22	1	2R_13362513_SNP	FBgn0034224	CG6520	DOWNSTREAM	206	A	T	T	0.1429	5	30	-2.714	1.18066e-06	(TF_binding_site|BDTNP1_TFBS_da|FBsf0000324538);(TF_binding_site|BDTNP1_TFBS_dl|FBsf0000302783);(TF_binding_site|BDTNP1_TFBS_twi|FBsf0000199641)
22	1	2R_13362513_SNP	FBgn0022987	qkr54B	DOWNSTREAM	360	A	T	T	0.1429	5	30	-2.714	1.18066e-06	(TF_binding_site|BDTNP1_TFBS_da|FBsf0000324538);(TF_binding_site|BDTNP1_TFBS_dl|FBsf0000302783);(TF_binding_site|BDTNP1_TFBS_twi|FBsf0000199641)
22	1	2R_13362521_SNP	FBgn0034224	CG6520	DOWNSTREAM	198	T	G	G	0.1176	4	30	-3.059	2.21771e-07	(TF_binding_site|BDTNP1_TFBS_da|FBsf0000324538);(TF_binding_site|BDTNP1_TFBS_dl|FBsf0000302783);(TF_binding_site|BDTNP1_TFBS_twi|FBsf0000199641)
22	1	2R_13362521_SNP	FBgn0022987	qkr54B	DOWNSTREAM	368	T	G	G	0.1176	4	30	-3.059	2.21771e-07	(TF_binding_site|BDTNP1_TFBS_da|FBsf0000324538);(TF_binding_site|BDTNP1_TFBS_dl|FBsf0000302783);(TF_binding_site|BDTNP1_TFBS_twi|FBsf0000199641)
22	1	2R_15282821_SNP	FBgn0261439	SdhA	INTRON	0	A	G	G	0.1	4	36	-2.994	4.20614e-07	(TF_binding_site|BDTNP1_TFBS_dl|FBsf0000303216);(TF_binding_site|mE1_TFBS_sens|FBsf0000228898);(TF_binding_site|mE1_TFBS_Trl|FBsf0000338918)
22	1	2R_15282821_SNP	FBgn0034443	cer	DOWNSTREAM	899	A	G	G	0.1	4	36	-2.994	4.20614e-07	(TF_binding_site|BDTNP1_TFBS_dl|FBsf0000303216);(TF_binding_site|mE1_TFBS_sens|FBsf0000228898);(TF_binding_site|mE1_TFBS_Trl|FBsf0000338918)
22	1	2R_15282895_SNP	FBgn0261439	SdhA	INTRON	0	G	A	A	0.1	4	36	-2.994	4.20614e-07	(TF_binding_site|BDTNP1_TFBS_dl|FBsf0000303216);(TF_binding_site|mE1_TFBS_sens|FBsf0000228898);(TF_binding_site|mE1_TFBS_Trl|FBsf0000338918)
22	1	2R_15282895_SNP	FBgn0034443	cer	DOWNSTREAM	825	G	A	A	0.1	4	36	-2.994	4.20614e-07	(TF_binding_site|BDTNP1_TFBS_dl|FBsf0000303216);(TF_binding_site|mE1_TFBS_sens|FBsf0000228898);(TF_binding_site|mE1_TFBS_Trl|FBsf0000338918)
22	1	2R_15283748_SNP	FBgn0034443	cer	UTR_3_PRIME	0	A	T	T	0.1	4	36	-2.994	4.20614e-07	(TF_binding_site|BDTNP1_TFBS_dl|FBsf0000303217);(TF_binding_site|BDTNP1_TFBS_Med|FBsf0000280911);(TF_binding_site|mE1_TFBS_disco|FBsf0000259875);(TF_binding_site|mE1_TFBS_HSA|FBsf0000358386);(TF_binding_site|mE1_TFBS_sens|FBsf0000228900);(TF_binding_site|mE1_TFBS_Ubx|FBsf0000263148)
22	1	2R_15283748_SNP	FBgn0261439	SdhA	UPSTREAM	272	A	T	T	0.1	4	36	-2.994	4.20614e-07	(TF_binding_site|BDTNP1_TFBS_dl|FBsf0000303217);(TF_binding_site|BDTNP1_TFBS_Med|FBsf0000280911);(TF_binding_site|mE1_TFBS_disco|FBsf0000259875);(TF_binding_site|mE1_TFBS_HSA|FBsf0000358386);(TF_binding_site|mE1_TFBS_sens|FBsf0000228900);(TF_binding_site|mE1_TFBS_Ubx|FBsf0000263148)
22	1	2R_15283748_SNP	FBgn0263391	hts	DOWNSTREAM	789	A	T	T	0.1	4	36	-2.994	4.20614e-07	(TF_binding_site|BDTNP1_TFBS_dl|FBsf0000303217);(TF_binding_site|BDTNP1_TFBS_Med|FBsf0000280911);(TF_binding_site|mE1_TFBS_disco|FBsf0000259875);(TF_binding_site|mE1_TFBS_HSA|FBsf0000358386);(TF_binding_site|mE1_TFBS_sens|FBsf0000228900);(TF_binding_site|mE1_TFBS_Ubx|FBsf0000263148)
22	1	2R_1581795_SNP	Intergenic	Intergenic			C	A	A	0.2778	10	26	-2.159	6.61564e-08	(TF_binding_site|mE1_TFBS_bab1|FBsf0000214158);(TF_binding_site|mE1_TFBS_HSA|FBsf0000353544);(TF_binding_site|mE1_TFBS_kn|FBsf0000336290);(TF_binding_site|mE1_TFBS_ttk|FBsf0000335369);(TF_binding_site|mE1_TFBS_zfh1|FBsf0000334610)
22	1	2R_17766313_DEL	FBgn0085397	Fili	INTRON	0	AA	A	AA	0.1765	6	28	-2.515	1.32459e-06	(TF_binding_site|mE1_TFBS_cnc|FBsf0000206423)
22	1	2R_3395707_SNP	FBgn0261397	didum	UTR_3_PRIME	0	T	C	C	0.1	4	36	-2.994	4.20614e-07	-
22	1	2R_3395707_SNP	FBgn0033184	CG12736	DOWNSTREAM	325	T	C	C	0.1	4	36	-2.994	4.20614e-07	-
22	1	2R_3418596_SNP	FBgn0033188	Drat	INTRON	0	T	C	C	0.1	4	36	-2.994	4.20614e-07	(TF_binding_site|BDTNP1_TFBS_da|FBsf0000323393);(TF_binding_site|BDTNP1_TFBS_dl|FBsf0000300466);(TF_binding_site|BDTNP1_TFBS_hb|FBsf0000289974);(TF_binding_site|BDTNP1_TFBS_Med|FBsf0000279462);(TF_binding_site|BDTNP1_TFBS_slp1|FBsf0000271998);(TF_binding_site|BDTNP1_TFBS_twi|FBsf0000198673);(TF_binding_site|mE1_TFBS_cad|FBsf0000245998);(TF_binding_site|mE1_TFBS_HSA|FBsf0000354204);(TF_binding_sit…
22	1	2R_3418597_SNP	FBgn0033188	Drat	INTRON	0	T	C	C	0.1	4	36	-2.994	4.20614e-07	(TF_binding_site|BDTNP1_TFBS_da|FBsf0000323393);(TF_binding_site|BDTNP1_TFBS_dl|FBsf0000300466);(TF_binding_site|BDTNP1_TFBS_hb|FBsf0000289974);(TF_binding_site|BDTNP1_TFBS_Med|FBsf0000279462);(TF_binding_site|BDTNP1_TFBS_slp1|FBsf0000271998);(TF_binding_site|BDTNP1_TFBS_twi|FBsf0000198673);(TF_binding_site|mE1_TFBS_cad|FBsf0000245998);(TF_binding_site|mE1_TFBS_HSA|FBsf0000354204);(TF_binding_sit…
22	1	2R_4852266_SNP	FBgn0033358	CG8216	INTRON	0	A	T	T	0.1026	4	35	-2.983	6.1854e-07	(TF_binding_site|mE1_TFBS_cad|FBsf0000246141)
22	1	2R_4852289_SNP	FBgn0033358	CG8216	INTRON	0	T	A	A	0.1026	4	35	-2.983	6.1854e-07	(TF_binding_site|mE1_TFBS_cad|FBsf0000246141)
22	1	2R_5237323_SNP	FBgn0033403	CG13739	INTRON	0	T	C	C	0.1	4	36	-2.994	4.20614e-07	-
22	1	2R_5237323_SNP	FBgn0033405	CG13954	INTRON	0	T	C	C	0.1	4	36	-2.994	4.20614e-07	-
22	1	2R_5237323_SNP	FBgn0033404	Or45a	DOWNSTREAM	955	T	C	C	0.1	4	36	-2.994	4.20614e-07	-
22	1	2R_5256612_SNP	FBgn0033405	CG13954	INTRON	0	C	T	T	0.1	4	36	-2.994	4.20614e-07	(TF_binding_site|BDTNP1_TFBS_da|FBsf0000323583);(TF_binding_site|mE1_TFBS_HSA|FBsf0000354891)
22	1	2R_5453550_SNP	FBgn0085436	Not1	DOWNSTREAM	101	A	T	T	0.1026	4	35	-2.995	5.30626e-07	(TF_binding_site|BDTNP1_TFBS_dl|FBsf0000300906);(TF_binding_site|mE1_TFBS_HSA|FBsf0000354968)
22	1	2R_5453550_SNP	FBgn0266819	CR45281	UPSTREAM	855	A	T	T	0.1026	4	35	-2.995	5.30626e-07	(TF_binding_site|BDTNP1_TFBS_dl|FBsf0000300906);(TF_binding_site|mE1_TFBS_HSA|FBsf0000354968)
22	1	2R_5508265_SNP	FBgn0033438	Mmp2	INTRON	0	T	C	C	0.1026	4	35	-2.936	1.79305e-06	-
22	1	2R_5508265_SNP	FBgn0262172	mir-307b	UPSTREAM	474	T	C	C	0.1026	4	35	-2.936	1.79305e-06	-
22	1	2R_5508265_SNP	FBgn0262385	mir-307a	DOWNSTREAM	491	T	C	C	0.1026	4	35	-2.936	1.79305e-06	-
22	1	2R_8667729_SNP	FBgn0003326	sca	UPSTREAM	317	T	G	G	0.1	4	36	-2.994	4.20614e-07	(TF_binding_site|BDTNP1_TFBS_bcd|FBsf0000333418);(TF_binding_site|BDTNP1_TFBS_da|FBsf0000324015);(TF_binding_site|BDTNP1_TFBS_ftz|FBsf0000295203);(TF_binding_site|BDTNP1_TFBS_hb|FBsf0000290116);(TF_binding_site|BDTNP1_TFBS_kni|FBsf0000289646);(TF_binding_site|BDTNP1_TFBS_Mad|FBsf0000289426);(TF_binding_site|BDTNP1_TFBS_Med|FBsf0000280110);(TF_binding_site|BDTNP1_TFBS_prd|FBsf0000274378);(TF_bindi…
22	1	2R_8980960_SNP	Intergenic	Intergenic			C	A	A	0.1351	5	32	-2.67	1.83756e-06	-
22	1	2R_8980965_SNP	Intergenic	Intergenic			C	G	G	0.1316	5	33	-2.698	1.13696e-06	-
22	1	2R_8982617_SNP	Intergenic	Intergenic			A	T	T	0.1282	5	34	-2.696	1.08901e-06	(TF_binding_site|mE1_TFBS_inv|FBsf0000236550)
22	1	2R_8982654_SNP	Intergenic	Intergenic			G	A	A	0.125	5	35	-2.672	1.54769e-06	(TF_binding_site|mE1_TFBS_inv|FBsf0000236550)
22	1	2R_9157356_SNP	FBgn0052843	Dh31-R	INTRON	0	C	T	T	0.1	4	36	-2.994	4.20614e-07	-
22	1	2R_9661447_SNP	FBgn0033867	Cpr50Ca	INTRON	0	A	C	C	0.1538	6	33	-2.47	1.74668e-06	(TF_binding_site|mE1_TFBS_inv|FBsf0000236570)
22	1	2R_9661573_DEL	FBgn0033867	Cpr50Ca	INTRON	0	A	ACCAAAAA	ACCAAAAA	0.1538	6	33	-2.47	1.74668e-06	(TF_binding_site|mE1_TFBS_inv|FBsf0000236570)
22	1	2R_9661764_SNP	FBgn0033867	Cpr50Ca	NON_SYNONYMOUS_CODING	0	T	A	A	0.175	7	33	-2.329	1.11003e-06	-
22	1	2R_9661767_SNP	FBgn0033867	Cpr50Ca	SYNONYMOUS_CODING	0	T	G	G	0.3077	12	27	-1.903	8.83579e-07	-
22	1	3L_10712957_DEL	Intergenic	Intergenic			T	TT	TT	0.3	12	28	-1.828	1.79702e-06	-
22	1	3L_10712960_SNP	Intergenic	Intergenic			T	G	G	0.3077	12	27	-1.834	1.93866e-06	-
22	1	3L_10712971_SNP	Intergenic	Intergenic			T	A	A	0.3	12	28	-1.828	1.79702e-06	-
22	1	3L_10712975_SNP	Intergenic	Intergenic			C	A	A	0.2632	10	28	-2.086	2.07489e-07	-
22	1	3L_10712976_SNP	Intergenic	Intergenic			A	G	G	0.2821	11	28	-1.922	1.17289e-06	-
22	1	3L_10712988_SNP	Intergenic	Intergenic			G	T	T	0.2821	11	28	-1.922	1.17289e-06	-
22	1	3L_10712990_SNP	Intergenic	Intergenic			A	T	T	0.2821	11	28	-1.922	1.17289e-06	-
22	1	3L_10712993_SNP	Intergenic	Intergenic			T	A	A	0.2821	11	28	-1.922	1.17289e-06	-
22	1	3L_10713020_SNP	Intergenic	Intergenic			T	A	A	0.2821	11	28	-1.907	1.52898e-06	-
22	1	3L_10713111_SNP	Intergenic	Intergenic			G	A	A	0.3	12	28	-1.828	1.79702e-06	-
22	1	3L_10713128_SNP	Intergenic	Intergenic			C	T	T	0.2821	11	28	-1.922	1.17289e-06	-
22	1	3L_10713166_DEL	Intergenic	Intergenic			T	TAGCATTAAGC	TAGCATTAAGC	0.3	12	28	-1.828	1.79702e-06	-
22	1	3L_10713181_SNP	Intergenic	Intergenic			A	T	T	0.3	12	28	-1.828	1.79702e-06	-
22	1	3L_10713183_DEL	Intergenic	Intergenic			A	AT	AT	0.3	12	28	-1.828	1.79702e-06	-
22	1	3L_10713186_SNP	Intergenic	Intergenic			T	A	A	0.2821	11	28	-1.727	1.85041e-06	-
22	1	3L_10713187_SNP	Intergenic	Intergenic			T	G	G	0.3077	12	27	-1.869	9.38181e-07	-
22	1	3L_10713201_SNP	Intergenic	Intergenic			G	A	A	0.3	12	28	-1.828	1.79702e-06	-
22	1	3L_10713220_SNP	Intergenic	Intergenic			A	G	G	0.3077	12	27	-1.905	4.04426e-07	-
22	1	3L_12340095_DEL	FBgn0036278	CrzR	INTRON	0	A	CTTTAACTT	CTTTAACTT	0.1026	4	35	-2.965	7.86534e-07	-
22	1	3L_12344180_SNP	FBgn0036278	CrzR	INTRON	0	T	C	C	0.1081	4	33	-2.941	1.40439e-06	-
22	1	3L_12344260_SNP	FBgn0036278	CrzR	INTRON	0	A	C	C	0.1053	4	34	-2.998	4.32585e-07	-
22	1	3L_12344268_SNP	FBgn0036278	CrzR	INTRON	0	G	T	T	0.1538	6	33	-2.465	1.92584e-06	-
22	1	3L_13580108_SNP	FBgn0264001	bru-3	INTRON	0	T	C	C	0.1	4	36	-2.994	4.20614e-07	-
22	1	3L_13601613_SNP	FBgn0264001	bru-3	INTRON	0	C	G	G	0.1	4	36	-2.994	4.20614e-07	-
22	1	3L_13605882_SNP	FBgn0264001	bru-3	INTRON	0	A	G	G	0.1	4	36	-2.994	4.20614e-07	-
22	1	3L_13607954_SNP	FBgn0264001	bru-3	INTRON	0	A	C	C	0.1	4	36	-2.994	4.20614e-07	(TF_binding_site|BDTNP1_TFBS_dl|FBsf0000307277);(TF_binding_site|BDTNP1_TFBS_twi|FBsf0000203721);(TF_binding_site|mE1_TFBS_HSA|FBsf0000364948)
22	1	3L_13611414_SNP	FBgn0264001	bru-3	INTRON	0	G	T	T	0.1	4	36	-2.994	4.20614e-07	-
22	1	3L_13616167_SNP	FBgn0264001	bru-3	INTRON	0	T	G	G	0.125	5	35	-2.672	1.54769e-06	-
22	1	3L_13920471_SNP	FBgn0036386	CG8833	INTRON	0	G	T	T	0.1026	4	35	-2.949	1.37943e-06	-
22	1	3L_14201185_SNP	FBgn0013718	nuf	INTRON	0	A	G	G	0.1026	4	35	-2.976	7.52042e-07	-
22	1	3L_14979017_SNP	FBgn0002778	mnd	INTRON	0	C	A	A	0.1	4	36	-2.994	4.20614e-07	(TF_binding_site|mE1_TFBS_cad|FBsf0000245048);(TF_binding_site|mE1_TFBS_Kr|FBsf0000253587)
22	1	3L_14981963_SNP	FBgn0002778	mnd	INTRON	0	T	C	C	0.1	4	36	-2.994	4.20614e-07	(TF_binding_site|BDTNP1_TFBS_da|FBsf0000327130);(TF_binding_site|BDTNP1_TFBS_twi|FBsf0000203854)
22	1	3L_14982248_DEL	FBgn0002778	mnd	INTRON	0	T	TAA	TAA	0.1111	4	32	-3.007	5.04107e-07	(TF_binding_site|BDTNP1_TFBS_da|FBsf0000327130)
22	1	3L_15845759_SNP	FBgn0264908	pHCl	INTRON	0	G	A	A	0.1212	4	29	-3.044	3.0925e-07	-
22	1	3L_15857528_SNP	FBgn0264908	pHCl	INTRON	0	T	G	G	0.2432	9	28	-2.095	1.85202e-06	-
22	1	3L_15857534_SNP	FBgn0264908	pHCl	INTRON	0	C	T	T	0.2432	9	28	-2.095	1.85202e-06	-
22	1	3L_16299206_SNP	FBgn0036600	CG13043	UPSTREAM	236	T	A	A	0.1053	4	34	-2.956	1.25589e-06	-
22	1	3L_16299206_SNP	FBgn0036601	CG13063	UPSTREAM	494	T	A	A	0.1053	4	34	-2.956	1.25589e-06	-
22	1	3L_16456672_DEL	FBgn0053158	CG33158	INTRON	0	C	CTC	CTC	0.1026	4	35	-3.027	2.26261e-07	(TF_binding_site|BDTNP1_TFBS_twi|FBsf0000204031);(TF_binding_site|mE1_TFBS_HSA|FBsf0000365880)
22	1	3L_17997114_SNP	FBgn0000568	Eip75B	INTRON	0	G	T	T	0.3684	14	24	-1.793	1.21675e-06	(TF_binding_site|BDTNP1_TFBS_z|FBsf0000197268)
22	1	3L_17997114_SNP	FBgn0086081	snoRNA:Me28S-A30	UPSTREAM	936	G	T	T	0.3684	14	24	-1.793	1.21675e-06	(TF_binding_site|BDTNP1_TFBS_z|FBsf0000197268)
22	1	3L_19098631_SNP	FBgn0036851	CG14082	UTR_3_PRIME	0	G	A	A	0.1351	5	32	-2.688	1.53064e-06	-
22	1	3L_19543281_SNP	FBgn0262517	l_3_76BDr	NON_SYNONYMOUS_CODING	0	T	C	C	0.1	4	36	-2.994	4.20614e-07	-
22	1	3L_23198464_SNP	Intergenic	Intergenic			C	T	T	0.1026	4	35	-3.007	3.3796e-07	(transposable_element|FlyBase|FBti0020288)
22	1	3L_23218574_SNP	FBgn0266347	nAChRalpha4	INTRON	0	G	T	T	0.1026	4	35	-2.99	4.89902e-07	-
22	1	3L_23625839_SNP	FBgn0250816	AGO3	INTRON	0	T	C	C	0.1176	4	30	-2.959	1.81199e-06	-
22	1	3L_23745573_SNP	Intergenic	Intergenic			G	A	A	0.1026	4	35	-2.99	4.89902e-07	-
22	1	3L_23804145_SNP	Intergenic	Intergenic			G	A	A	0.1111	4	32	-3.086	7.49934e-08	-
22	1	3L_23849686_SNP	FBgn0058470	CG40470	INTRON	0	G	C	C	0.1111	4	32	-2.969	1.22219e-06	(TF_binding_site|mE1_TFBS_HSA|FBsf0000368146);(TF_binding_site|mE1_TFBS_Trl|FBsf0000340500)
22	1	3L_6190633_SNP	FBgn0024921	Trn	SYNONYMOUS_CODING	0	A	G	G	0.1	4	36	-2.994	4.20614e-07	(TF_binding_site|BDTNP1_TFBS_twi|FBsf0000203064);(TF_binding_site|mE1_TFBS_HSA|FBsf0000362615)
22	1	3L_9895337_SNP	FBgn0036059	nudE	DOWNSTREAM	401	A	G	G	0.1	4	36	-2.994	4.20614e-07	-
22	1	3R_12465330_SNP	FBgn0262742	Fas1	UTR_3_PRIME	0	G	A	A	0.1316	5	33	-2.67	1.92205e-06	(TF_binding_site|BDTNP1_TFBS_dl|FBsf0000312154)
22	1	3R_12465330_SNP	FBgn0015520	nonA-l	UPSTREAM	597	G	A	A	0.1316	5	33	-2.67	1.92205e-06	(TF_binding_site|BDTNP1_TFBS_dl|FBsf0000312154)
22	1	3R_13844228_INS	FBgn0263995	cpo	UTR_3_PRIME	0	AA	A	A	0.1	4	36	-2.994	4.20614e-07	-
22	1	3R_13844228_INS	FBgn0000477	DNaseII	UPSTREAM	868	AA	A	A	0.1	4	36	-2.994	4.20614e-07	-
22	1	3R_14738062_SNP	FBgn0038660	CG14291	NON_SYNONYMOUS_CODING	0	A	C	C	0.1026	4	35	-2.975	4.28976e-07	(TF_binding_site|mE1_TFBS_cad|FBsf0000248730);(TF_binding_site|mE1_TFBS_HSA|FBsf0000373012);(TF_binding_site|mE1_TFBS_Trl|FBsf0000341341)
22	1	3R_14738077_SNP	FBgn0038660	CG14291	SYNONYMOUS_CODING	0	A	G	G	0.1026	4	35	-2.975	4.28976e-07	(TF_binding_site|mE1_TFBS_cad|FBsf0000248730);(TF_binding_site|mE1_TFBS_HSA|FBsf0000373012);(TF_binding_site|mE1_TFBS_Trl|FBsf0000341341)
22	1	3R_14807686_SNP	FBgn0022338	dnk	INTRON	0	G	A	A	0.1	4	36	-2.994	4.20614e-07	(TF_binding_site|BDTNP1_TFBS_da|FBsf0000329755);(TF_binding_site|BDTNP1_TFBS_dl|FBsf0000312719);(TF_binding_site|BDTNP1_TFBS_Med|FBsf0000285852);(TF_binding_site|BDTNP1_TFBS_twi|FBsf0000265437);(TF_binding_site|mE1_TFBS_HSA|FBsf0000373029);(TF_binding_site|mE1_TFBS_sens|FBsf0000232428)
22	1	3R_14807686_SNP	FBgn0038666	Smu1	UPSTREAM	640	G	A	A	0.1	4	36	-2.994	4.20614e-07	(TF_binding_site|BDTNP1_TFBS_da|FBsf0000329755);(TF_binding_site|BDTNP1_TFBS_dl|FBsf0000312719);(TF_binding_site|BDTNP1_TFBS_Med|FBsf0000285852);(TF_binding_site|BDTNP1_TFBS_twi|FBsf0000265437);(TF_binding_site|mE1_TFBS_HSA|FBsf0000373029);(TF_binding_site|mE1_TFBS_sens|FBsf0000232428)
22	1	3R_14807686_SNP	FBgn0261792	snRNP-U1-C	DOWNSTREAM	1000	G	A	A	0.1	4	36	-2.994	4.20614e-07	(TF_binding_site|BDTNP1_TFBS_da|FBsf0000329755);(TF_binding_site|BDTNP1_TFBS_dl|FBsf0000312719);(TF_binding_site|BDTNP1_TFBS_Med|FBsf0000285852);(TF_binding_site|BDTNP1_TFBS_twi|FBsf0000265437);(TF_binding_site|mE1_TFBS_HSA|FBsf0000373029);(TF_binding_site|mE1_TFBS_sens|FBsf0000232428)
22	1	3R_15392333_SNP	FBgn0260003	Dys	INTRON	0	A	T	T	0.1351	5	32	-2.737	6.26334e-07	-
22	1	3R_26342844_SNP	FBgn0027654	jdp	UTR_3_PRIME	0	A	T	A	0.125	5	35	-2.672	1.54769e-06	-
22	1	3R_26342844_SNP	FBgn0039784	CG9698	DOWNSTREAM	203	A	T	A	0.125	5	35	-2.672	1.54769e-06	-
22	1	X_13237998_SNP	FBgn0267272	CR45708	DOWNSTREAM	916	A	C	A	0.1111	4	32	-2.97	1.34421e-06	-
22	1	X_19451915_INS	FBgn0263514	mir-4966	UPSTREAM	487	CGAGGAAGTATTC	C	C	0.1111	4	32	-2.96	1.23862e-06	-
22	1	X_19451915_INS	FBgn0262338	mir-2499	DOWNSTREAM	780	CGAGGAAGTATTC	C	C	0.1111	4	32	-2.96	1.23862e-06	-
22	1	X_19451915_INS	FBgn0262228	mir-975	UPSTREAM	870	CGAGGAAGTATTC	C	C	0.1111	4	32	-2.96	1.23862e-06	-
22	1	X_2484626_SNP	FBgn0001404	egh	INTRON	0	A	G	G	0.1	4	36	-2.994	4.20614e-07	(TF_binding_site|BDTNP1_TFBS_da|FBsf0000331469);(TF_binding_site|BDTNP1_TFBS_dl|FBsf0000316119);(TF_binding_site|BDTNP1_TFBS_Med|FBsf0000287562);(TF_binding_site|BDTNP1_TFBS_twi|FBsf0000204917);(TF_binding_site|mE1_TFBS_HSA|FBsf0000378607)
22	1	X_4295211_SNP	FBgn0052773	CR32773	INTRON	0	C	G	G	0.1026	4	35	-2.976	7.15481e-07	-
22	2	2R_15119931_SNP	FBgn0010434	cora	INTRON	0	T	G	G	0.125	5	35	-2.367	2.43392e-07	(TF_binding_site|mE1_TFBS_cad|FBsf0000247002);(TF_binding_site|mE1_TFBS_HSA|FBsf0000358333)
22	5	2R_10639980_SNP	FBgn0028689	Rpn6	INTRON	0	A	C	C	0.1026	4	35	-1.935	2.12508e-06	(TF_binding_site|BDTNP1_TFBS_bcd|FBsf0000333438);(TF_binding_site|BDTNP1_TFBS_dl|FBsf0000302179);(TF_binding_site|BDTNP1_TFBS_Med|FBsf0000280366);(TF_binding_site|BDTNP1_TFBS_z|FBsf0000196596);(TF_binding_site|mE1_TFBS_cnc|FBsf0000206375);(TF_binding_site|mE1_TFBS_h|FBsf0000256741);(TF_binding_site|mE1_TFBS_HSA|FBsf0000356799);(TF_binding_site|mE1_TFBS_kn|FBsf0000336364);(TF_binding_site|mE1_TFBS…
22	5	2R_10639980_SNP	FBgn0050476	ave	UPSTREAM	46	A	C	C	0.1026	4	35	-1.935	2.12508e-06	(TF_binding_site|BDTNP1_TFBS_bcd|FBsf0000333438);(TF_binding_site|BDTNP1_TFBS_dl|FBsf0000302179);(TF_binding_site|BDTNP1_TFBS_Med|FBsf0000280366);(TF_binding_site|BDTNP1_TFBS_z|FBsf0000196596);(TF_binding_site|mE1_TFBS_cnc|FBsf0000206375);(TF_binding_site|mE1_TFBS_h|FBsf0000256741);(TF_binding_site|mE1_TFBS_HSA|FBsf0000356799);(TF_binding_site|mE1_TFBS_kn|FBsf0000336364);(TF_binding_site|mE1_TFBS…
22	5	2R_10639980_SNP	FBgn0033960	CG10151	DOWNSTREAM	862	A	C	C	0.1026	4	35	-1.935	2.12508e-06	(TF_binding_site|BDTNP1_TFBS_bcd|FBsf0000333438);(TF_binding_site|BDTNP1_TFBS_dl|FBsf0000302179);(TF_binding_site|BDTNP1_TFBS_Med|FBsf0000280366);(TF_binding_site|BDTNP1_TFBS_z|FBsf0000196596);(TF_binding_site|mE1_TFBS_cnc|FBsf0000206375);(TF_binding_site|mE1_TFBS_h|FBsf0000256741);(TF_binding_site|mE1_TFBS_HSA|FBsf0000356799);(TF_binding_site|mE1_TFBS_kn|FBsf0000336364);(TF_binding_site|mE1_TFBS…
22	5	2R_10640078_SNP	FBgn0050476	ave	UTR_5_PRIME	0	A	G	G	0.1026	4	35	-1.935	2.12508e-06	(TF_binding_site|BDTNP1_TFBS_bcd|FBsf0000333438);(TF_binding_site|BDTNP1_TFBS_dl|FBsf0000302179);(TF_binding_site|BDTNP1_TFBS_Med|FBsf0000280366);(TF_binding_site|BDTNP1_TFBS_z|FBsf0000196596);(TF_binding_site|mE1_TFBS_cnc|FBsf0000206375);(TF_binding_site|mE1_TFBS_h|FBsf0000256741);(TF_binding_site|mE1_TFBS_HSA|FBsf0000356799);(TF_binding_site|mE1_TFBS_kn|FBsf0000336364);(TF_binding_site|mE1_TFBS…
22	5	2R_10640078_SNP	FBgn0028689	Rpn6	INTRON	0	A	G	G	0.1026	4	35	-1.935	2.12508e-06	(TF_binding_site|BDTNP1_TFBS_bcd|FBsf0000333438);(TF_binding_site|BDTNP1_TFBS_dl|FBsf0000302179);(TF_binding_site|BDTNP1_TFBS_Med|FBsf0000280366);(TF_binding_site|BDTNP1_TFBS_z|FBsf0000196596);(TF_binding_site|mE1_TFBS_cnc|FBsf0000206375);(TF_binding_site|mE1_TFBS_h|FBsf0000256741);(TF_binding_site|mE1_TFBS_HSA|FBsf0000356799);(TF_binding_site|mE1_TFBS_kn|FBsf0000336364);(TF_binding_site|mE1_TFBS…
22	5	2R_10640078_SNP	FBgn0033960	CG10151	DOWNSTREAM	764	A	G	G	0.1026	4	35	-1.935	2.12508e-06	(TF_binding_site|BDTNP1_TFBS_bcd|FBsf0000333438);(TF_binding_site|BDTNP1_TFBS_dl|FBsf0000302179);(TF_binding_site|BDTNP1_TFBS_Med|FBsf0000280366);(TF_binding_site|BDTNP1_TFBS_z|FBsf0000196596);(TF_binding_site|mE1_TFBS_cnc|FBsf0000206375);(TF_binding_site|mE1_TFBS_h|FBsf0000256741);(TF_binding_site|mE1_TFBS_HSA|FBsf0000356799);(TF_binding_site|mE1_TFBS_kn|FBsf0000336364);(TF_binding_site|mE1_TFBS…
22	5	2R_10641152_SNP	FBgn0033960	CG10151	NON_SYNONYMOUS_CODING	0	G	A	A	0.1053	4	34	-1.969	1.25908e-06	(TF_binding_site|mE1_TFBS_cad|FBsf0000246671);(TF_binding_site|mE1_TFBS_chinmo|FBsf0000211301)
22	5	2R_10641152_SNP	FBgn0050476	ave	DOWNSTREAM	378	G	A	A	0.1053	4	34	-1.969	1.25908e-06	(TF_binding_site|mE1_TFBS_cad|FBsf0000246671);(TF_binding_site|mE1_TFBS_chinmo|FBsf0000211301)
22	5	2R_10641152_SNP	FBgn0028689	Rpn6	UPSTREAM	737	G	A	A	0.1053	4	34	-1.969	1.25908e-06	(TF_binding_site|mE1_TFBS_cad|FBsf0000246671);(TF_binding_site|mE1_TFBS_chinmo|FBsf0000211301)
22	5	2R_14718875_SNP	FBgn0034397	CG15082	INTRON	0	G	C	C	0.1053	4	34	-2.027	4.51351e-07	-
22	5	3L_18375202_INS	Intergenic	Intergenic			T	TT	T	0.1026	4	35	-1.966	1.26707e-06	-
22	5	3L_446137_SNP	FBgn0001316	klar	INTRON	0	T	C	T	0.2105	8	30	-1.522	5.88785e-07	(TF_binding_site|BDTNP1_TFBS_dl|FBsf0000304725);(TF_binding_site|mE1_TFBS_HSA|FBsf0000360717);(TF_binding_site|mE1_TFBS_Trl|FBsf0000339281)
22	5	3L_446153_SNP	FBgn0001316	klar	INTRON	0	T	A	T	0.2	8	32	-1.498	8.21961e-07	(TF_binding_site|BDTNP1_TFBS_dl|FBsf0000304725);(TF_binding_site|mE1_TFBS_HSA|FBsf0000360717);(TF_binding_site|mE1_TFBS_Trl|FBsf0000339281)
22	5	3L_446154_DEL	FBgn0001316	klar	INTRON	0	GGATAATAA	G	GGATAATAA	0.2	8	32	-1.498	8.21961e-07	(TF_binding_site|BDTNP1_TFBS_dl|FBsf0000304725);(TF_binding_site|mE1_TFBS_HSA|FBsf0000360717);(TF_binding_site|mE1_TFBS_Trl|FBsf0000339281)
22	5	3R_17571542_SNP	FBgn0051343	CG31343	SYNONYMOUS_CODING	0	C	T	T	0.1	4	36	-1.992	7.59807e-07	(TF_binding_site|mE1_TFBS_cad|FBsf0000248963)
22	5	3R_17571585_SNP	FBgn0051343	CG31343	INTRON	0	A	G	G	0.1	4	36	-1.992	7.59807e-07	(TF_binding_site|mE1_TFBS_cad|FBsf0000248963)
22	5	3R_24568426_SNP	FBgn0039595	AstA-R2	INTRON	0	A	C	C	0.2564	10	29	-1.357	1.06158e-06	-
22	5	X_11522880_SNP	FBgn0004370	Ptp10D	INTRON	0	G	A	A	0.1026	4	35	-1.976	1.06171e-06	-
22	6	2L_16233423_SNP	FBgn0261999	CG42817	INTRON	0	A	G	G	0.3421	13	25	1.162	1.66578e-06	-
22	6	2R_5052534_SNP	FBgn0033388	CG8046	UPSTREAM	62	A	T	A	0.4054	15	22	-1.145	2.4101e-07	-
22	6	2R_5052534_SNP	FBgn0033389	Rad51C	UPSTREAM	603	A	T	A	0.4054	15	22	-1.145	2.4101e-07	-
22	6	3R_4746556_SNP	FBgn0262614	pyd	INTRON	0	G	A	A	0.4857	17	18	-1.141	3.98693e-07	-
22	6	X_16630358_SNP	FBgn0027528	CG9634	INTRON	0	T	C	T	0.4722	17	19	-1.118	1.75724e-06	-
22	6	X_16630358_SNP	FBgn0052570	TwdlY	DOWNSTREAM	345	T	C	T	0.4722	17	19	-1.118	1.75724e-06	-
22	7	3R_4418719_SNP	FBgn0261929	5-HT2B	INTRON	0	T	C	C	0.4054	15	22	0.9965	1.5892e-06	-
22	8	2L_4157901_SNP	Intergenic	Intergenic			T	C	C	0.3784	14	23	-0.9838	3.13362e-07	-
22	8	X_21875146_SNP	FBgn0031189	CG14618	UPSTREAM	388	T	G	G	0.4054	15	22	-0.9303	1.51721e-06	(TF_binding_site|BDTNP1_TFBS_dl|FBsf0000320797);(TF_binding_site|mE1_TFBS_HSA|FBsf0000350285);(transposable_element|FlyBase|FBti0019721)
22	8	X_21875198_SNP	FBgn0031189	CG14618	UPSTREAM	336	G	T	T	0.3333	13	26	-0.9257	1.44766e-06	(TF_binding_site|BDTNP1_TFBS_dl|FBsf0000320797);(TF_binding_site|mE1_TFBS_HSA|FBsf0000350285);(transposable_element|FlyBase|FBti0019721)
22	9	3L_10687304_SNP	FBgn0047038	CG6463	UPSTREAM	96	G	C	C	0.2973	11	26	-0.968	2.13665e-06	(TF_binding_site|BDTNP1_TFBS_Med|FBsf0000282705);(TF_binding_site|mE1_TFBS_HSA|FBsf0000363996);(TF_binding_site|mE1_TFBS_Ubx|FBsf0000262385)
22	9	3L_10687304_SNP	FBgn0036101	NijA	DOWNSTREAM	156	G	C	C	0.2973	11	26	-0.968	2.13665e-06	(TF_binding_site|BDTNP1_TFBS_Med|FBsf0000282705);(TF_binding_site|mE1_TFBS_HSA|FBsf0000363996);(TF_binding_site|mE1_TFBS_Ubx|FBsf0000262385)
22	9	3L_10687321_SNP	FBgn0047038	CG6463	UPSTREAM	113	C	T	T	0.3333	13	26	-0.9062	1.48437e-06	(TF_binding_site|BDTNP1_TFBS_Med|FBsf0000282705);(TF_binding_site|mE1_TFBS_HSA|FBsf0000363996);(TF_binding_site|mE1_TFBS_Ubx|FBsf0000262385)
22	9	3L_10687321_SNP	FBgn0036101	NijA	DOWNSTREAM	139	C	T	T	0.3333	13	26	-0.9062	1.48437e-06	(TF_binding_site|BDTNP1_TFBS_Med|FBsf0000282705);(TF_binding_site|mE1_TFBS_HSA|FBsf0000363996);(TF_binding_site|mE1_TFBS_Ubx|FBsf0000262385)
22	10	3L_7143915_SNP	FBgn0259173	corn	INTRON	0	C	A	A	0.175	7	33	0.9959	1.44781e-06	(TF_binding_site|BDTNP1_TFBS_prd|FBsf0000275426);(TF_binding_site|BDTNP1_TFBS_twi|FBsf0000203129);(TF_binding_site|mE1_TFBS_HSA|FBsf0000362876)
22	10	3L_8997311_SNP	FBgn0035954	Doc3	UPSTREAM	985	T	G	G	0.4615	18	21	-0.7641	1.26078e-06	(TF_binding_site|BDTNP1_TFBS_da|FBsf0000326448);(TF_binding_site|BDTNP1_TFBS_dl|FBsf0000306380);(TF_binding_site|BDTNP1_TFBS_Med|FBsf0000282551);(TF_binding_site|BDTNP1_TFBS_prd|FBsf0000275476);(TF_binding_site|BDTNP1_TFBS_sna|FBsf0000269243);(TF_binding_site|BDTNP1_TFBS_twi|FBsf0000203277);(TF_binding_site|mE1_TFBS_cad|FBsf0000244557)
22	10	3R_1918610_SNP	FBgn0026077	Gasp	DOWNSTREAM	115	A	T	T	0.2973	11	26	0.8641	1.27926e-06	-
22	13	2L_3388471_SNP	FBgn0259950	CG42460	START_GAINED	0	A	C	A	0.1579	6	32	-0.883	1.84138e-06	-
22	13	2L_3388471_SNP	FBgn0259949	Sfp23F	UPSTREAM	728	A	C	A	0.1579	6	32	-0.883	1.84138e-06	-
22	13	2L_3388471_SNP	FBgn0266026	CR44791	UPSTREAM	877	A	C	A	0.1579	6	32	-0.883	1.84138e-06	-
22	13	3L_5496110_SNP	FBgn0085371	CG34342	DOWNSTREAM	518	T	A	A	0.15	6	34	-0.888	1.2831e-06	-
22	14	2R_17268954_SNP	Intergenic	Intergenic			T	C	C	0.2703	10	27	0.7127	1.78027e-06	(TF_binding_site|mE1_TFBS_bab1|FBsf0000214324);(TF_binding_site|mE1_TFBS_inv|FBsf0000236815)
22	14	3R_17612474_SNP	FBgn0013759	CASK	SYNONYMOUS_CODING	0	G	T	G	0.425	17	23	0.6551	1.81535e-07	-
22	14	3R_17612474_SNP	FBgn0266181	CRG	UPSTREAM	544	G	T	G	0.425	17	23	0.6551	1.81535e-07	-
22	14	3R_17612492_SNP	FBgn0013759	CASK	SYNONYMOUS_CODING	0	A	G	A	0.4103	16	23	0.6363	1.07104e-06	-
22	14	3R_17612492_SNP	FBgn0266181	CRG	UPSTREAM	562	A	G	A	0.4103	16	23	0.6363	1.07104e-06	-
22	14	3R_17613384_SNP	FBgn0013759	CASK	INTRON	0	A	T	A	0.4615	18	21	0.6727	9.32665e-08	-
22	15	3L_10792436_SNP	Intergenic	Intergenic			G	A	G	0.3684	14	24	0.6117	1.95641e-06	-
22	16	2L_11896079_SNP	FBgn0264815	Pde1c	INTRON	0	C	G	C	0.2564	10	29	-0.6797	1.67894e-07	-
22	16	2R_11398532_SNP	FBgn0034025	GalNAc-T1	UPSTREAM	683	T	C	T	0.4167	15	21	-0.5776	1.87881e-06	-
22	16	2R_14087695_SNP	Intergenic	Intergenic			A	C	A	0.4737	18	20	-0.566	2.05754e-06	-

## Sheet: B. Males
Module	PC	SNP ID	Flybase ID	Gene Symbol	SNP Location	Position	Minor Allele	Major Allele	Ref Allele	MAF	Minor Allele Count	Major Allele Count	Effect Size	P-value	Regulation Annotation
1	1	2L_19629721_SNP	FBgn0000464	Lar	INTRON	0	A	G	G	0.3784	14	23	0.9868	1.68295e-06	-
1	1	X_6107538_DEL	Intergenic	Intergenic			AA	A	AA	0.4865	18	19	-0.954	1.53022e-06	-
1	1	X_6107544_SNP	Intergenic	Intergenic			A	C	A	0.4865	18	19	-0.965	1.03335e-06	-
2	1	2L_16458835_SNP	Intergenic	Intergenic			G	C	G	0.4103	16	23	-1.586	1.29221e-06	(regulatory_region|REDfly_CRMs|FBsf0000435041);(regulatory_region|REDfly_CRMs|FBsf0000435520)
2	1	2L_16459061_SNP	Intergenic	Intergenic			G	T	G	0.3846	15	24	-1.595	1.55997e-06	(regulatory_region|REDfly_CRMs|FBsf0000435041);(regulatory_region|REDfly_CRMs|FBsf0000435520);(TF_binding_site|mE1_TFBS_cnc|FBsf0000206269)
2	1	2L_16459062_SNP	Intergenic	Intergenic			G	C	G	0.3846	15	24	-1.595	1.55997e-06	(regulatory_region|REDfly_CRMs|FBsf0000435041);(regulatory_region|REDfly_CRMs|FBsf0000435520);(TF_binding_site|mE1_TFBS_cnc|FBsf0000206269)
2	1	2L_16459070_SNP	Intergenic	Intergenic			A	C	A	0.3684	14	24	-1.641	1.48822e-06	(regulatory_region|REDfly_CRMs|FBsf0000435041);(regulatory_region|REDfly_CRMs|FBsf0000435520);(TF_binding_site|mE1_TFBS_cnc|FBsf0000206269)
2	1	3L_2423882_SNP	FBgn0266696	CG45186	INTRON	0	T	A	A	0.425	17	23	1.582	7.77507e-07	-
2	1	3R_10467098_SNP	FBgn0038248	CG7886	INTRON	0	T	G	G	0.4615	18	21	1.558	2.09076e-06	(TF_binding_site|BDTNP1_TFBS_twi|FBsf0000265005)
2	1	3R_10467098_SNP	FBgn0038247	Cad88C	INTRON	0	T	G	G	0.4615	18	21	1.558	2.09076e-06	(TF_binding_site|BDTNP1_TFBS_twi|FBsf0000265005)
2	1	3R_26332937_SNP	FBgn0039782	CG15539	NON_SYNONYMOUS_CODING	0	G	A	G	0.45	18	22	1.533	1.4699e-06	-
2	1	3R_26332937_SNP	FBgn0263527	mir-4908	DOWNSTREAM	328	G	A	G	0.45	18	22	1.533	1.4699e-06	-
2	1	3R_26332937_SNP	FBgn0054041	CG34041	UPSTREAM	808	G	A	G	0.45	18	22	1.533	1.4699e-06	-
2	1	3R_26332982_SNP	FBgn0039782	CG15539	SYNONYMOUS_CODING	0	T	A	T	0.4	16	24	1.603	5.30198e-07	-
2	1	3R_26332982_SNP	FBgn0263527	mir-4908	DOWNSTREAM	373	T	A	T	0.4	16	24	1.603	5.30198e-07	-
2	1	3R_26332982_SNP	FBgn0054041	CG34041	UPSTREAM	763	T	A	T	0.4	16	24	1.603	5.30198e-07	-
2	2	3L_3947601_SNP	FBgn0035478	CG10853	UPSTREAM	290	T	A	A	0.359	14	25	-0.6509	1.98686e-06	-
2	2	3L_3947601_SNP	FBgn0035477	CG14982	DOWNSTREAM	323	T	A	A	0.359	14	25	-0.6509	1.98686e-06	-
2	3	3R_16038222_SNP	FBgn0083975	Nlg4	SYNONYMOUS_CODING	0	T	C	C	0.1	4	36	-0.7099	1.92384e-06	-
2	3	3R_16042471_SNP	FBgn0083975	Nlg4	INTRON	0	A	C	C	0.1	4	36	-0.7099	1.92384e-06	(TF_binding_site|BDTNP1_TFBS_da|FBsf0000329882);(TF_binding_site|BDTNP1_TFBS_dl|FBsf0000312924);(TF_binding_site|BDTNP1_TFBS_hb|FBsf0000292647);(TF_binding_site|BDTNP1_TFBS_Med|FBsf0000285958);(TF_binding_site|BDTNP1_TFBS_sna|FBsf0000271180);(TF_binding_site|BDTNP1_TFBS_twi|FBsf0000265534);(TF_binding_site|mE1_TFBS_HSA|FBsf0000373390)
2	3	3R_16042593_SNP	FBgn0083975	Nlg4	INTRON	0	T	A	A	0.1026	4	35	-0.713	1.51996e-06	(TF_binding_site|BDTNP1_TFBS_da|FBsf0000329882);(TF_binding_site|BDTNP1_TFBS_dl|FBsf0000312924);(TF_binding_site|BDTNP1_TFBS_hb|FBsf0000292647);(TF_binding_site|BDTNP1_TFBS_Med|FBsf0000285958);(TF_binding_site|BDTNP1_TFBS_sna|FBsf0000271180);(TF_binding_site|BDTNP1_TFBS_twi|FBsf0000265534);(TF_binding_site|mE1_TFBS_HSA|FBsf0000373390)
2	3	3R_16043193_SNP	FBgn0083975	Nlg4	INTRON	0	T	C	C	0.1	4	36	-0.7099	1.92384e-06	(TF_binding_site|BDTNP1_TFBS_da|FBsf0000329882);(TF_binding_site|BDTNP1_TFBS_hb|FBsf0000292647);(TF_binding_site|BDTNP1_TFBS_Med|FBsf0000285959);(TF_binding_site|BDTNP1_TFBS_twi|FBsf0000265534);(TF_binding_site|mE1_TFBS_HSA|FBsf0000373390)
2	3	3R_16043242_SNP	FBgn0083975	Nlg4	INTRON	0	C	G	G	0.1	4	36	-0.7099	1.92384e-06	(TF_binding_site|BDTNP1_TFBS_hb|FBsf0000292647);(TF_binding_site|BDTNP1_TFBS_Med|FBsf0000285959);(TF_binding_site|BDTNP1_TFBS_twi|FBsf0000265534)
2	3	3R_16044984_DEL	FBgn0083975	Nlg4	INTRON	0	A	ATCATTACAA	ATCATTACAA	0.1	4	36	-0.7099	1.92384e-06	-
3	1	2L_13553147_SNP	FBgn0259984	kuz	INTRON	0	T	A	A	0.4444	16	20	0.936	1.84265e-06	(TF_binding_site|BDTNP1_TFBS_dl|FBsf0000298506);(TF_binding_site|mE1_TFBS_HSA|FBsf0000350851)
3	1	2L_13553364_DEL	FBgn0259984	kuz	INTRON	0	A	AA	AA	0.3684	14	24	0.9304	1.77856e-06	(TF_binding_site|BDTNP1_TFBS_dl|FBsf0000298506);(TF_binding_site|mE1_TFBS_HSA|FBsf0000350851)
3	1	2L_13553375_SNP	FBgn0259984	kuz	INTRON	0	A	T	T	0.359	14	25	0.9375	9.77085e-07	(TF_binding_site|BDTNP1_TFBS_dl|FBsf0000298506);(TF_binding_site|mE1_TFBS_HSA|FBsf0000350851)
3	1	2R_11831840_SNP	FBgn0034053	Cyp4aa1	INTRON	0	T	C	T	0.4595	17	20	-0.927	7.32173e-07	-
3	1	2R_11831840_SNP	FBgn0050093	CG30093	SYNONYMOUS_CODING	0	T	C	T	0.4595	17	20	-0.927	7.32173e-07	-
3	2	2L_6203012_SNP	FBgn0085409	CG34380	INTRON	0	G	C	C	0.1538	6	33	-0.5722	1.43489e-06	(TF_binding_site|mE1_TFBS_chinmo|FBsf0000207335)
3	2	2L_8822925_SNP	Intergenic	Intergenic			C	G	G	0.1795	7	32	-0.5796	6.75434e-08	(TF_binding_site|BDTNP1_TFBS_dl|FBsf0000297595)
3	2	2R_11883210_SNP	FBgn0020236	ATPCL	SYNONYMOUS_CODING	0	G	C	C	0.125	5	35	-0.611	1.64074e-06	-
3	2	2R_12490549_SNP	FBgn0034143	CG8303	INTRON	0	A	G	G	0.125	5	35	-0.6111	1.64307e-06	-
3	2	2R_15129589_SNP	FBgn0010434	cora	INTRON	0	T	G	G	0.2308	9	30	-0.4989	6.95036e-07	-
3	2	2R_1848498_SNP	FBgn0033048	CG7881	DOWNSTREAM	5	G	A	A	0.1	4	36	-0.701	4.21394e-07	-
3	2	2R_1848498_SNP	FBgn0033047	CG7882	DOWNSTREAM	810	G	A	A	0.1	4	36	-0.701	4.21394e-07	-
3	2	2R_1883163_SNP	FBgn0264959	Src42A	INTRON	0	G	A	A	0.1081	4	33	-0.7075	3.60676e-07	-
3	2	2R_1883437_SNP	FBgn0264959	Src42A	INTRON	0	G	T	T	0.1026	4	35	-0.7029	4.06072e-07	-
3	2	2R_1936391_SNP	FBgn0085241	CG34212	DOWNSTREAM	988	G	A	A	0.1	4	36	-0.7029	3.18679e-07	-
3	2	2R_19472234_INS	FBgn0015903	apt	INTRON	0	ATTATTATTTAAAGAATATGAACATAAAAGGTAGCAAT	A	A	0.225	9	31	-0.4908	1.59297e-06	(TF_binding_site|BDTNP1_TFBS_dl|FBsf0000304140);(TF_binding_site|BDTNP1_TFBS_twi|FBsf0000200262);(TF_binding_site|mE1_TFBS_HSA|FBsf0000359842)
3	2	2R_19472249_SNP	FBgn0015903	apt	INTRON	0	T	A	A	0.2368	9	29	-0.4913	1.99848e-06	(TF_binding_site|BDTNP1_TFBS_dl|FBsf0000304140);(TF_binding_site|BDTNP1_TFBS_twi|FBsf0000200262);(TF_binding_site|mE1_TFBS_HSA|FBsf0000359842)
3	2	2R_19472275_SNP	FBgn0015903	apt	INTRON	0	C	T	T	0.225	9	31	-0.4908	1.59297e-06	(TF_binding_site|BDTNP1_TFBS_dl|FBsf0000304140);(TF_binding_site|BDTNP1_TFBS_twi|FBsf0000200262);(TF_binding_site|mE1_TFBS_HSA|FBsf0000359842)
3	2	2R_5511627_INS	FBgn0033438	Mmp2	INTRON	0	GATG	G	G	0.1316	5	33	-0.6531	1.70419e-07	-
3	2	2R_5512868_SNP	FBgn0033438	Mmp2	INTRON	0	C	A	A	0.1765	6	28	-0.5874	9.89593e-07	-
3	2	3L_13929874_SNP	Intergenic	Intergenic			C	T	T	0.1429	5	30	-0.6562	1.96249e-07	-
3	2	3L_7087884_INS	FBgn0053556	form3	UPSTREAM	33	CC	C	C	0.2632	10	28	-0.4757	1.7293e-06	(TF_binding_site|BDTNP1_TFBS_dl|FBsf0000306019)
3	2	3L_7087884_INS	FBgn0035737	Cpr65Ec	DOWNSTREAM	944	CC	C	C	0.2632	10	28	-0.4757	1.7293e-06	(TF_binding_site|BDTNP1_TFBS_dl|FBsf0000306019)
3	2	3L_8578807_SNP	FBgn0262508	CG43078	INTRON	0	T	C	C	0.2162	8	29	-0.5158	1.23826e-06	-
3	2	3L_9585123_SNP	FBgn0261555	CG42673	INTRON	0	A	C	A	0.4242	14	19	-0.4958	6.32028e-08	-
3	2	3R_12935006_SNP	FBgn0014141	cher	INTRON	0	T	A	T	0.2432	9	28	-0.5025	1.01686e-06	-
3	2	3R_18115174_SNP	FBgn0051163	SKIP	INTRON	0	G	C	C	0.3684	14	24	-0.4333	1.06688e-06	-
3	2	3R_19688576_SNP	FBgn0025574	Pli	INTRON	0	G	T	T	0.1	4	36	-0.7029	3.18679e-07	(TF_binding_site|BDTNP1_TFBS_da|FBsf0000330312);(TF_binding_site|BDTNP1_TFBS_twi|FBsf0000265904);(TF_binding_site|mE1_TFBS_HSA|FBsf0000374615);(TF_binding_site|mE1_TFBS_sens|FBsf0000233203)
3	2	X_17718675_SNP	FBgn0030869	Socs16D	SYNONYMOUS_CODING	0	A	G	G	0.1	4	36	-0.701	4.21394e-07	(TF_binding_site|mE1_TFBS_cad|FBsf0000243607);(TF_binding_site|mE1_TFBS_chinmo|FBsf0000209087);(TF_binding_site|mE1_TFBS_HSA|FBsf0000348999)
3	2	X_18256848_SNP	FBgn0030914	CG6106	DOWNSTREAM	288	A	C	C	0.2286	8	27	-0.5232	1.42417e-06	-
4	2	2L_15805672_SNP	Intergenic	Intergenic			T	A	A	0.275	11	29	0.6457	1.26279e-06	-
4	2	2L_918619_SNP	FBgn0046113	GluRIIC	DOWNSTREAM	814	G	A	A	0.1579	6	32	0.8212	1.02858e-06	(TF_binding_site|mE1_TFBS_cad|FBsf0000241073)
4	2	3L_11878803_SNP	FBgn0266100	CG44837	INTRON	0	T	C	C	0.175	7	33	0.7876	2.15415e-07	-
4	2	3R_25723379_SNP	FBgn0051038	CG31038	INTRON	0	T	A	A	0.2	8	32	0.7891	3.28264e-08	(TF_binding_site|mE1_TFBS_chinmo|FBsf0000213727)
4	2	3R_25723415_SNP	FBgn0051038	CG31038	INTRON	0	A	T	T	0.3077	12	27	0.6321	1.19126e-06	(TF_binding_site|mE1_TFBS_chinmo|FBsf0000213727)
4	2	X_20866428_SNP	Intergenic	Intergenic			T	C	C	0.2051	8	31	0.7034	1.38681e-06	-
4	3	2R_8913878_SNP	Intergenic	Intergenic			T	C	C	0.3421	13	25	0.3884	1.70936e-06	-
5	1	2R_12210844_SNP	FBgn0034114	CG4282	SYNONYMOUS_CODING	0	T	C	C	0.125	5	35	1.997	1.06148e-07	(TF_binding_site|mE1_TFBS_sens|FBsf0000228386)
5	1	2R_19928627_SNP	FBgn0034964	IntS1	SYNONYMOUS_CODING	0	T	C	C	0.225	9	31	1.576	1.94066e-07	(TF_binding_site|mE1_TFBS_chinmo|FBsf0000211988)
5	1	3L_10871410_SNP	FBgn0036104	CG6418	NON_SYNONYMOUS_CODING	0	T	G	G	0.1	4	36	2.089	9.30221e-07	(TF_binding_site|mE1_TFBS_sens|FBsf0000223836)
5	1	3L_10871410_SNP	FBgn0036105	Blos4	UPSTREAM	775	T	G	G	0.1	4	36	2.089	9.30221e-07	(TF_binding_site|mE1_TFBS_sens|FBsf0000223836)
5	1	3L_10873341_SNP	FBgn0036105	Blos4	DOWNSTREAM	53	A	T	T	0.1026	4	35	2.082	1.12126e-06	-
5	1	3L_10873341_SNP	FBgn0036106	CG6409	DOWNSTREAM	458	A	T	T	0.1026	4	35	2.082	1.12126e-06	-
5	1	3L_10874624_SNP	FBgn0036106	CG6409	SYNONYMOUS_CODING	0	A	T	T	0.125	5	35	1.873	1.74785e-06	(TF_binding_site|mE1_TFBS_chinmo|FBsf0000210065)
5	1	3L_10874632_SNP	FBgn0036106	CG6409	NON_SYNONYMOUS_CODING	0	G	C	C	0.1	4	36	2.089	9.30221e-07	(TF_binding_site|mE1_TFBS_chinmo|FBsf0000210065)
5	1	3L_10874633_SNP	FBgn0036106	CG6409	SYNONYMOUS_CODING	0	T	A	A	0.1	4	36	2.089	9.30221e-07	(TF_binding_site|mE1_TFBS_chinmo|FBsf0000210065)
5	1	3L_10874947_SNP	FBgn0036106	CG6409	SYNONYMOUS_CODING	0	A	G	G	0.1	4	36	2.089	9.30221e-07	-
5	1	3L_10875000_SNP	FBgn0036106	CG6409	INTRON	0	C	T	T	0.1	4	36	2.089	9.30221e-07	-
5	1	3L_10875000_SNP	FBgn0036107	CG7949	UPSTREAM	990	C	T	T	0.1	4	36	2.089	9.30221e-07	-
5	1	3L_10875050_SNP	FBgn0036106	CG6409	INTRON	0	T	A	A	0.1	4	36	2.089	9.30221e-07	-
5	1	3L_10875050_SNP	FBgn0036107	CG7949	UPSTREAM	940	T	A	A	0.1	4	36	2.089	9.30221e-07	-
5	1	3L_10875075_SNP	FBgn0036106	CG6409	INTRON	0	C	T	T	0.1	4	36	2.089	9.30221e-07	-
5	1	3L_10875075_SNP	FBgn0036107	CG7949	UPSTREAM	915	C	T	T	0.1	4	36	2.089	9.30221e-07	-
5	1	3R_26504130_SNP	Intergenic	Intergenic			C	G	G	0.1053	4	34	2.108	7.73436e-07	(TF_binding_site|mE1_TFBS_HSA|FBsf0000376775);(TF_binding_site|mE1_TFBS_Kr|FBsf0000253841)
5	1	X_18273625_SNP	FBgn0004957	por	SYNONYMOUS_CODING	0	A	C	C	0.1351	5	32	1.902	1.2518e-06	(TF_binding_site|BDTNP1_TFBS_dl|FBsf0000320076);(TF_binding_site|mE1_TFBS_cad|FBsf0000243632);(TF_binding_site|mE1_TFBS_HSA|FBsf0000349180);(TF_binding_site|mE1_TFBS_sens|FBsf0000221552)
5	1	X_18273625_SNP	FBgn0030915	CG6179	UPSTREAM	490	A	C	C	0.1351	5	32	1.902	1.2518e-06	(TF_binding_site|BDTNP1_TFBS_dl|FBsf0000320076);(TF_binding_site|mE1_TFBS_cad|FBsf0000243632);(TF_binding_site|mE1_TFBS_HSA|FBsf0000349180);(TF_binding_site|mE1_TFBS_sens|FBsf0000221552)
5	2	2R_14793257_SNP	FBgn0034408	sano	INTRON	0	T	A	T	0.1389	5	31	-0.9897	1.90715e-07	-
5	2	2R_14793375_SNP	FBgn0034408	sano	INTRON	0	T	A	T	0.1667	6	30	-0.8995	4.34501e-07	-
5	2	3L_6622812_SNP	FBgn0004619	GluRIA	INTRON	0	T	C	T	0.2105	8	30	-0.7934	6.01044e-07	-
5	2	3R_26545061_SNP	Intergenic	Intergenic			T	G	G	0.3333	13	26	-0.6317	1.48193e-06	(TF_binding_site|BDTNP1_TFBS_da|FBsf0000330904)
5	3	X_2620544_SNP	FBgn0000927	fs_1_Ya	UTR_3_PRIME	0	A	G	G	0.125	5	35	0.7175	2.11482e-06	(TF_binding_site|BDTNP1_TFBS_sna|FBsf0000269850);(TF_binding_site|BDTNP1_TFBS_twi|FBsf0000204935);(TF_binding_site|mE1_TFBS_chinmo|FBsf0000208233);(TF_binding_site|mE1_TFBS_HSA|FBsf0000378672)
5	3	X_2620544_SNP	FBgn0024977	CG2709	UPSTREAM	196	A	G	G	0.125	5	35	0.7175	2.11482e-06	(TF_binding_site|BDTNP1_TFBS_sna|FBsf0000269850);(TF_binding_site|BDTNP1_TFBS_twi|FBsf0000204935);(TF_binding_site|mE1_TFBS_chinmo|FBsf0000208233);(TF_binding_site|mE1_TFBS_HSA|FBsf0000378672)
5	3	X_2620650_SNP	FBgn0000927	fs_1_Ya	DOWNSTREAM	40	G	T	T	0.125	5	35	0.7175	2.11482e-06	(TF_binding_site|BDTNP1_TFBS_dl|FBsf0000316167);(TF_binding_site|BDTNP1_TFBS_twi|FBsf0000204935);(TF_binding_site|mE1_TFBS_cad|FBsf0000242780);(TF_binding_site|mE1_TFBS_chinmo|FBsf0000208233)
5	3	X_2620650_SNP	FBgn0024977	CG2709	UPSTREAM	90	G	T	T	0.125	5	35	0.7175	2.11482e-06	(TF_binding_site|BDTNP1_TFBS_dl|FBsf0000316167);(TF_binding_site|BDTNP1_TFBS_twi|FBsf0000204935);(TF_binding_site|mE1_TFBS_cad|FBsf0000242780);(TF_binding_site|mE1_TFBS_chinmo|FBsf0000208233)
5	3	X_2621806_SNP	FBgn0000520	dwg	UTR_5_PRIME	0	G	A	A	0.125	5	35	0.7175	2.11482e-06	(TF_binding_site|BDTNP1_TFBS_dl|FBsf0000316168);(TF_binding_site|BDTNP1_TFBS_Med|FBsf0000287577);(TF_binding_site|BDTNP1_TFBS_twi|FBsf0000204936);(TF_binding_site|mE1_TFBS_cad|FBsf0000242780);(TF_binding_site|mE1_TFBS_h|FBsf0000257756);(TF_binding_site|mE1_TFBS_HSA|FBsf0000378673)
5	3	X_2621806_SNP	FBgn0024977	CG2709	DOWNSTREAM	284	G	A	A	0.125	5	35	0.7175	2.11482e-06	(TF_binding_site|BDTNP1_TFBS_dl|FBsf0000316168);(TF_binding_site|BDTNP1_TFBS_Med|FBsf0000287577);(TF_binding_site|BDTNP1_TFBS_twi|FBsf0000204936);(TF_binding_site|mE1_TFBS_cad|FBsf0000242780);(TF_binding_site|mE1_TFBS_h|FBsf0000257756);(TF_binding_site|mE1_TFBS_HSA|FBsf0000378673)
5	3	X_2622230_SNP	FBgn0000520	dwg	SYNONYMOUS_CODING	0	A	G	G	0.125	5	35	0.7175	2.11482e-06	(TF_binding_site|BDTNP1_TFBS_dl|FBsf0000316168);(TF_binding_site|BDTNP1_TFBS_twi|FBsf0000204937);(TF_binding_site|mE1_TFBS_cad|FBsf0000242780);(TF_binding_site|mE1_TFBS_sens|FBsf0000219354)
5	3	X_2622230_SNP	FBgn0024977	CG2709	DOWNSTREAM	708	A	G	G	0.125	5	35	0.7175	2.11482e-06	(TF_binding_site|BDTNP1_TFBS_dl|FBsf0000316168);(TF_binding_site|BDTNP1_TFBS_twi|FBsf0000204937);(TF_binding_site|mE1_TFBS_cad|FBsf0000242780);(TF_binding_site|mE1_TFBS_sens|FBsf0000219354)
5	3	X_2622284_SNP	FBgn0000520	dwg	SYNONYMOUS_CODING	0	A	G	G	0.125	5	35	0.7175	2.11482e-06	(TF_binding_site|BDTNP1_TFBS_dl|FBsf0000316168);(TF_binding_site|BDTNP1_TFBS_twi|FBsf0000204937);(TF_binding_site|mE1_TFBS_cad|FBsf0000242780);(TF_binding_site|mE1_TFBS_sens|FBsf0000219354)
5	3	X_2622284_SNP	FBgn0024977	CG2709	DOWNSTREAM	762	A	G	G	0.125	5	35	0.7175	2.11482e-06	(TF_binding_site|BDTNP1_TFBS_dl|FBsf0000316168);(TF_binding_site|BDTNP1_TFBS_twi|FBsf0000204937);(TF_binding_site|mE1_TFBS_cad|FBsf0000242780);(TF_binding_site|mE1_TFBS_sens|FBsf0000219354)
5	3	X_2622990_SNP	FBgn0000520	dwg	INTRON	0	A	G	G	0.125	5	35	0.7175	2.11482e-06	(TF_binding_site|BDTNP1_TFBS_da|FBsf0000331483);(TF_binding_site|BDTNP1_TFBS_sna|FBsf0000269851);(TF_binding_site|BDTNP1_TFBS_twi|FBsf0000204937);(TF_binding_site|mE1_TFBS_cad|FBsf0000242780);(TF_binding_site|mE1_TFBS_chinmo|FBsf0000208234);(TF_binding_site|mE1_TFBS_HSA|FBsf0000378674);(TF_binding_site|mE1_TFBS_sens|FBsf0000219354)
5	3	X_2623035_SNP	FBgn0000520	dwg	SYNONYMOUS_CODING	0	A	G	G	0.125	5	35	0.7175	2.11482e-06	(TF_binding_site|BDTNP1_TFBS_da|FBsf0000331483);(TF_binding_site|BDTNP1_TFBS_Mad|FBsf0000289557);(TF_binding_site|BDTNP1_TFBS_sna|FBsf0000269851);(TF_binding_site|BDTNP1_TFBS_twi|FBsf0000204937);(TF_binding_site|mE1_TFBS_cad|FBsf0000242780);(TF_binding_site|mE1_TFBS_chinmo|FBsf0000208234);(TF_binding_site|mE1_TFBS_HSA|FBsf0000378674)
5	3	X_2623083_SNP	FBgn0000520	dwg	SYNONYMOUS_CODING	0	A	G	G	0.125	5	35	0.7175	2.11482e-06	(TF_binding_site|BDTNP1_TFBS_da|FBsf0000331483);(TF_binding_site|BDTNP1_TFBS_Mad|FBsf0000289557);(TF_binding_site|BDTNP1_TFBS_sna|FBsf0000269851);(TF_binding_site|BDTNP1_TFBS_twi|FBsf0000204937);(TF_binding_site|mE1_TFBS_cad|FBsf0000242780);(TF_binding_site|mE1_TFBS_chinmo|FBsf0000208234);(TF_binding_site|mE1_TFBS_HSA|FBsf0000378674)
5	3	X_2623924_SNP	FBgn0000520	dwg	NON_SYNONYMOUS_CODING	0	G	C	C	0.1282	5	34	0.7197	2.02827e-06	(TF_binding_site|BDTNP1_TFBS_da|FBsf0000331484);(TF_binding_site|BDTNP1_TFBS_sna|FBsf0000269851);(TF_binding_site|BDTNP1_TFBS_twi|FBsf0000204937);(TF_binding_site|mE1_TFBS_chinmo|FBsf0000208234);(TF_binding_site|mE1_TFBS_HSA|FBsf0000378674)
5	3	X_2623924_SNP	FBgn0250874	ttm50	DOWNSTREAM	326	G	C	C	0.1282	5	34	0.7197	2.02827e-06	(TF_binding_site|BDTNP1_TFBS_da|FBsf0000331484);(TF_binding_site|BDTNP1_TFBS_sna|FBsf0000269851);(TF_binding_site|BDTNP1_TFBS_twi|FBsf0000204937);(TF_binding_site|mE1_TFBS_chinmo|FBsf0000208234);(TF_binding_site|mE1_TFBS_HSA|FBsf0000378674)
5	3	X_2624230_SNP	FBgn0250874	ttm50	DOWNSTREAM	20	A	G	G	0.125	5	35	0.7175	2.11482e-06	(TF_binding_site|BDTNP1_TFBS_sna|FBsf0000269851);(TF_binding_site|BDTNP1_TFBS_twi|FBsf0000204937)
5	3	X_2624230_SNP	FBgn0000520	dwg	DOWNSTREAM	155	A	G	G	0.125	5	35	0.7175	2.11482e-06	(TF_binding_site|BDTNP1_TFBS_sna|FBsf0000269851);(TF_binding_site|BDTNP1_TFBS_twi|FBsf0000204937)
6	1	3R_19025808_SNP	FBgn0262975	cnc	INTRON	0	G	A	G	0.3333	13	26	-1.832	1.99642e-06	(TF_binding_site|mE1_TFBS_disco|FBsf0000260991);(TF_binding_site|mE1_TFBS_HSA|FBsf0000374390);(TF_binding_site|mE1_TFBS_sens|FBsf0000233092)
6	1	3R_19025818_SNP	FBgn0262975	cnc	INTRON	0	C	T	C	0.3333	13	26	-1.832	1.99642e-06	(TF_binding_site|BDTNP1_TFBS_dl|FBsf0000313556);(TF_binding_site|mE1_TFBS_disco|FBsf0000260991);(TF_binding_site|mE1_TFBS_HSA|FBsf0000374390);(TF_binding_site|mE1_TFBS_sens|FBsf0000233092)
6	1	3R_19025820_SNP	FBgn0262975	cnc	INTRON	0	T	A	T	0.3333	13	26	-1.832	1.99642e-06	(TF_binding_site|BDTNP1_TFBS_dl|FBsf0000313556);(TF_binding_site|mE1_TFBS_disco|FBsf0000260991);(TF_binding_site|mE1_TFBS_HSA|FBsf0000374390);(TF_binding_site|mE1_TFBS_sens|FBsf0000233092)
6	2	2L_4312901_INS	FBgn0010473	tutl	INTRON	0	T	TTTACTGT	T	0.5	19	19	-0.7084	1.16831e-06	-
6	3	2L_7012115_SNP	FBgn0263026	CG43321	UPSTREAM	147	C	T	T	0.2703	10	27	-0.7083	1.98506e-06	(TF_binding_site|BDTNP1_TFBS_dl|FBsf0000297183)
6	3	2L_8063906_SNP	FBgn0011230	poe	SYNONYMOUS_CODING	0	T	A	A	0.1795	7	32	-0.7812	1.66991e-06	(TF_binding_site|mE1_TFBS_cad|FBsf0000241664);(TF_binding_site|mE1_TFBS_HSA|FBsf0000346624);(TF_binding_site|mE1_TFBS_sens|FBsf0000216721)
6	3	2R_6706724_SNP	FBgn0086898	dgo	INTRON	0	T	A	A	0.2162	8	29	-0.8045	1.06526e-06	(TF_binding_site|BDTNP1_TFBS_dl|FBsf0000301232);(TF_binding_site|mE1_TFBS_HSA|FBsf0000355412)
6	3	2R_6706724_SNP	FBgn0029134	Prosbeta5	UPSTREAM	759	T	A	A	0.2162	8	29	-0.8045	1.06526e-06	(TF_binding_site|BDTNP1_TFBS_dl|FBsf0000301232);(TF_binding_site|mE1_TFBS_HSA|FBsf0000355412)
7	1	2L_6001949_SNP	FBgn0031760	Tsp26A	UTR_3_PRIME	0	A	G	A	0.3684	14	24	-2.291	1.08966e-06	-
7	1	3R_21044445_SNP	FBgn0051106	CG31106	DOWNSTREAM	15	T	C	C	0.2105	8	30	-2.782	4.23518e-07	-
7	1	3R_21044445_SNP	FBgn0051103	CG31103	UPSTREAM	595	T	C	C	0.2105	8	30	-2.782	4.23518e-07	-
7	2	2L_18990901_SNP	FBgn0032734	CG15169	UPSTREAM	119	A	C	C	0.175	7	33	-1.09	3.4502e-07	-
7	2	2L_18990901_SNP	FBgn0032733	CG15170	UPSTREAM	668	A	C	C	0.175	7	33	-1.09	3.4502e-07	-
7	2	2L_18996804_SNP	FBgn0051792	CG31792	UPSTREAM	644	G	C	C	0.2	7	28	-1.056	1.86106e-06	-
7	2	2L_18996804_SNP	FBgn0046302	CG10650	UPSTREAM	870	G	C	C	0.2	7	28	-1.056	1.86106e-06	-
7	2	2L_19249338_SNP	Intergenic	Intergenic			T	A	A	0.1538	6	33	-1.119	1.35633e-06	-
7	2	2L_6306177_SNP	FBgn0053531	Ddr	INTRON	0	G	A	A	0.225	9	31	-0.9897	3.70991e-07	-
7	2	2R_10600257_SNP	FBgn0020269	mspo	INTRON	0	A	T	T	0.1795	7	32	-1.091	3.62738e-07	-
7	2	2R_10600258_SNP	FBgn0020269	mspo	INTRON	0	T	A	A	0.175	7	33	-1.077	5.31224e-07	-
7	2	2R_10600282_SNP	FBgn0020269	mspo	INTRON	0	T	A	A	0.2	8	32	-1.012	8.00956e-07	-
7	2	2R_10601288_SNP	FBgn0020269	mspo	UPSTREAM	161	G	T	T	0.1026	4	35	-1.376	4.11207e-07	(TF_binding_site|BDTNP1_TFBS_dl|FBsf0000302174);(TF_binding_site|BDTNP1_TFBS_Med|FBsf0000280364);(TF_binding_site|mE1_TFBS_D|FBsf0000240669);(TF_binding_site|mE1_TFBS_HSA|FBsf0000356789);(TF_binding_site|mE1_TFBS_Trl|FBsf0000338625)
7	2	2R_2080449_SNP	FBgn0262867	Ptr	INTRON	0	T	C	T	0.1282	5	34	-1.234	6.34282e-07	(TF_binding_site|BDTNP1_TFBS_dl|FBsf0000300172)
7	2	2R_2080452_SNP	FBgn0262867	Ptr	INTRON	0	C	G	C	0.1053	4	34	-1.354	7.86453e-07	(TF_binding_site|BDTNP1_TFBS_dl|FBsf0000300172)
7	2	2R_8436251_SNP	FBgn0011592	fra	INTRON	0	C	T	T	0.1892	7	30	-1.08	6.78779e-07	(TF_binding_site|BDTNP1_TFBS_da|FBsf0000323991);(TF_binding_site|mE1_TFBS_HSA|FBsf0000356038)
7	2	2R_8440298_DEL	FBgn0011592	fra	INTRON	0	C	CGAAC	CGAAC	0.125	5	35	-1.256	3.03275e-07	-
7	2	2R_8441280_SNP	FBgn0011592	fra	INTRON	0	C	T	T	0.15	6	34	-1.106	1.85902e-06	-
7	2	2R_8442544_SNP	FBgn0011592	fra	INTRON	0	G	A	A	0.15	6	34	-1.106	1.85902e-06	(TF_binding_site|BDTNP1_TFBS_da|FBsf0000323992);(TF_binding_site|mE1_TFBS_HSA|FBsf0000356040);(TF_binding_site|mE1_TFBS_Kr|FBsf0000253390)
7	2	3L_12300828_SNP	Intergenic	Intergenic			A	G	G	0.1282	5	34	-1.242	5.09557e-07	-
7	2	3L_16153081_SNP	FBgn0036576	CG5151	INTRON	0	G	C	C	0.1538	6	33	-1.149	5.33177e-07	-
7	2	3L_18197751_DEL	Intergenic	Intergenic			CACCC	C	CACCC	0.1351	5	32	-1.25	4.54822e-07	(TF_binding_site|BDTNP1_TFBS_dl|FBsf0000308345);(TF_binding_site|mE1_TFBS_HSA|FBsf0000366464)
7	2	3L_24385819_DEL	FBgn0259697	nvd	INTRON	0	A	AGCTCTGCGCGTAGTTGCTGTAGCTCGAACAT	AGCTCTGCGCGTAGTTGCTGTAGCTCGAACAT	0.2	8	32	-1.005	1.01129e-06	(transposable_element|DHGP|RR50960_transposable_element)
7	2	3R_11595980_SNP	Intergenic	Intergenic			A	G	G	0.2	8	32	-0.9899	1.71383e-06	-
7	2	3R_15779725_DEL	FBgn0038755	Hs6st	INTRON	0	T	TGTGTGTGGGCCGGTTCTACCTTAT	TGTGTGTGGGCCGGTTCTACCTTAT	0.15	6	34	-1.106	1.85902e-06	-
7	2	3R_19301035_SNP	Intergenic	Intergenic			C	A	C	0.1	4	36	-1.354	7.02287e-07	(TF_binding_site|BDTNP1_TFBS_prd|FBsf0000276788)
7	2	3R_9340926_SNP	Intergenic	Intergenic			A	T	T	0.1026	4	35	-1.328	1.47271e-06	-
7	2	X_18275494_SNP	FBgn0030915	CG6179	UTR_3_PRIME	0	C	A	A	0.1795	7	32	-1.067	1.93427e-06	-
7	2	X_18275494_SNP	FBgn0008635	betaCOP	DOWNSTREAM	88	C	A	A	0.1795	7	32	-1.067	1.93427e-06	-
7	2	X_3163020_SNP	FBgn0000479	dnc	INTRON	0	A	G	G	0.2308	9	30	-0.966	1.7071e-06	-
7	4	2L_3396448_SNP	FBgn0266027	CR44792	DOWNSTREAM	875	A	G	A	0.2632	10	28	0.8505	2.60934e-07	(TF_binding_site|mE1_TFBS_HSA|FBsf0000344952);(TF_binding_site|mE1_TFBS_sbb|FBsf0000249748)
7	4	2L_3396588_SNP	FBgn0266027	CR44792	DOWNSTREAM	735	G	A	G	0.2895	11	27	0.8346	1.69574e-07	(TF_binding_site|mE1_TFBS_HSA|FBsf0000344952);(TF_binding_site|mE1_TFBS_sbb|FBsf0000249748)
7	4	2R_14963298_SNP	FBgn0004168	5-HT1A	INTRON	0	G	T	T	0.4615	18	21	0.6942	9.8485e-07	-
7	6	2R_18259835_SNP	FBgn0034720	Liprin-gamma	INTRON	0	G	A	A	0.1892	7	30	-0.6759	1.31194e-06	-
7	6	2R_18632818_SNP	FBgn0259145	CG42260	INTRON	0	T	C	T	0.3077	12	27	-0.5099	2.05141e-06	(TF_binding_site|mE1_TFBS_chinmo|FBsf0000211815)
7	6	2R_6636698_DEL	FBgn0053144	CG33144	INTRON	0	A	AGAAA	AGAAA	0.1795	7	32	-0.6709	1.07063e-06	-
7	6	3L_22861791_DEL	FBgn0010348	Arf79F	UTR_3_PRIME	0	G	GTG	GTG	0.1892	7	30	-0.6881	5.78164e-07	(TF_binding_site|BDTNP1_TFBS_dl|FBsf0000309271)
7	6	3L_22861791_DEL	FBgn0037199	CG11137	UPSTREAM	449	G	GTG	GTG	0.1892	7	30	-0.6881	5.78164e-07	(TF_binding_site|BDTNP1_TFBS_dl|FBsf0000309271)
7	6	3L_22861791_DEL	FBgn0020518	snoRNA:Me28S-G764	DOWNSTREAM	853	G	GTG	GTG	0.1892	7	30	-0.6881	5.78164e-07	(TF_binding_site|BDTNP1_TFBS_dl|FBsf0000309271)
7	7	2R_15062206_SNP	FBgn0034420	CG10737	INTRON	0	G	C	C	0.2432	9	28	0.5639	1.32758e-06	-
7	7	3L_17886965_SNP	FBgn0036769	Tsp74F	INTRON	0	T	G	G	0.1081	4	33	0.7859	1.4904e-06	(TF_binding_site|BDTNP1_TFBS_twi|FBsf0000204151);(TF_binding_site|mE1_TFBS_HSA|FBsf0000366355)
7	7	3L_17886966_SNP	FBgn0036769	Tsp74F	INTRON	0	G	T	T	0.1053	4	34	0.7746	1.84279e-06	(TF_binding_site|BDTNP1_TFBS_twi|FBsf0000204151);(TF_binding_site|mE1_TFBS_HSA|FBsf0000366355)
7	7	3L_9179986_SNP	Intergenic	Intergenic			T	A	A	0.1795	7	32	0.6049	1.79861e-06	-
7	7	3R_19386073_SNP	FBgn0039089	beat-IV	INTRON	0	T	C	C	0.1842	7	31	0.6187	1.27501e-06	-
8	2	2L_12985065_SNP	Intergenic	Intergenic			A	G	G	0.125	5	35	1.129	1.88613e-06	-
8	2	2L_13015553_SNP	FBgn0032467	CG9934	INTRON	0	G	T	T	0.1	4	36	1.212	1.72208e-06	-
8	2	2L_3745344_SNP	FBgn0031568	CG10019	INTRON	0	C	G	G	0.1026	4	35	1.232	1.08364e-06	(TF_binding_site|mE1_TFBS_chinmo|FBsf0000207134)
8	2	X_11988121_DEL	FBgn0264675	CR43960	INTRON	0	ATGTGAAACGTAACTGCACTCAAGTTGCAGATCGCTAAAA	A	ATGTGAAACGTAACTGCACTCAAGTTGCAGATCGCTAAAA	0.3684	14	24	-0.8238	9.13476e-07	-
8	2	X_11988121_DEL	FBgn0267001	Ten-a	INTRON	0	ATGTGAAACGTAACTGCACTCAAGTTGCAGATCGCTAAAA	A	ATGTGAAACGTAACTGCACTCAAGTTGCAGATCGCTAAAA	0.3684	14	24	-0.8238	9.13476e-07	-
8	2	X_14571801_SNP	Intergenic	Intergenic			G	A	A	0.2308	9	30	0.8958	2.01812e-06	(TF_binding_site|BDTNP1_TFBS_sna|FBsf0000270288);(TF_binding_site|BDTNP1_TFBS_twi|FBsf0000263285);(TF_binding_site|mE1_TFBS_cad|FBsf0000243416);(TF_binding_site|mE1_TFBS_HSA|FBsf0000347904)
8	4	3R_25669794_SNP	FBgn0039709	Cad99C	INTRON	0	A	G	G	0.3421	13	25	-0.615	1.07164e-06	-
8	5	X_9290286_SNP	FBgn0261260	mgl	INTRON	0	T	G	G	0.2368	9	29	-0.5532	7.43641e-07	-
9	4	2L_10572486_SNP	FBgn0051721	Trim9	INTRON	0	A	G	G	0.25	10	30	0.3839	1.68486e-06	-
9	4	2L_15174604_SNP	FBgn0028888	CG4168	INTRON	0	T	A	T	0.35	14	26	0.357	8.61986e-07	-
10	1	2L_10860540_SNP	FBgn0027363	Stam	SYNONYMOUS_CODING	0	A	C	C	0.1053	4	34	-1.605	1.12003e-06	(TF_binding_site|mE1_TFBS_cad|FBsf0000241858);(TF_binding_site|mE1_TFBS_chinmo|FBsf0000207566)
10	1	2L_13668815_SNP	FBgn0028527	CG18507	INTRON	0	A	G	G	0.2051	8	31	-1.231	4.28072e-07	-
10	1	2L_13677298_SNP	FBgn0051814	CG31814	DOWNSTREAM	752	T	A	A	0.1176	4	30	-1.622	8.61679e-07	-
10	1	2L_13677330_SNP	FBgn0051814	CG31814	DOWNSTREAM	720	T	C	C	0.125	4	28	-1.585	2.14773e-06	-
10	1	2L_13888129_SNP	FBgn0028509	CenG1A	INTRON	0	A	T	A	0.1579	6	32	-1.428	1.12761e-07	(TF_binding_site|BDTNP1_TFBS_da|FBsf0000322370);(TF_binding_site|BDTNP1_TFBS_dl|FBsf0000298554);(TF_binding_site|BDTNP1_TFBS_hb|FBsf0000290823);(TF_binding_site|BDTNP1_TFBS_Med|FBsf0000278538);(TF_binding_site|BDTNP1_TFBS_twi|FBsf0000201662);(TF_binding_site|mE1_TFBS_cad|FBsf0000242081);(TF_binding_site|mE1_TFBS_HSA|FBsf0000350935)
10	1	2L_1865869_SNP	FBgn0051663	CG31663	INTRON	0	A	T	T	0.2	8	32	-1.259	1.50688e-07	-
10	1	2L_1866525_SNP	FBgn0051663	CG31663	SYNONYMOUS_CODING	0	A	G	G	0.275	11	29	-1.093	5.16273e-07	-
10	1	2L_1866540_SNP	FBgn0051663	CG31663	SYNONYMOUS_CODING	0	G	A	A	0.375	15	25	-0.9852	1.32302e-06	-
10	1	2R_4509342_SNP	FBgn0033313	Cirl	NON_SYNONYMOUS_CODING	0	C	A	A	0.1	4	36	-1.59	1.35982e-06	(TF_binding_site|mE1_TFBS_cad|FBsf0000246100);(TF_binding_site|mE1_TFBS_HSA|FBsf0000354597);(TF_binding_site|mE1_TFBS_sens|FBsf0000226853)
10	1	2R_4524375_SNP	Intergenic	Intergenic			G	C	C	0.1282	5	34	-1.486	5.10302e-07	(TF_binding_site|BDTNP1_TFBS_da|FBsf0000323511);(TF_binding_site|BDTNP1_TFBS_dl|FBsf0000300696);(TF_binding_site|BDTNP1_TFBS_ftz|FBsf0000295170);(TF_binding_site|BDTNP1_TFBS_hb|FBsf0000289999);(TF_binding_site|BDTNP1_TFBS_Med|FBsf0000279565);(TF_binding_site|BDTNP1_TFBS_prd|FBsf0000274267);(TF_binding_site|BDTNP1_TFBS_slp1|FBsf0000272017);(TF_binding_site|BDTNP1_TFBS_twi|FBsf0000198764);(TF_bindi…
10	1	2R_5696812_SNP	Intergenic	Intergenic			A	G	G	0.175	7	33	-1.258	1.33428e-06	-
10	1	2R_5696818_SNP	Intergenic	Intergenic			A	T	T	0.175	7	33	-1.258	1.33428e-06	-
10	1	2R_5697831_SNP	FBgn0033446	CG1648	DOWNSTREAM	648	A	G	G	0.1282	5	34	-1.5	3.56261e-07	(TF_binding_site|mE1_TFBS_bab1|FBsf0000214200)
10	1	2R_5700957_SNP	FBgn0033446	CG1648	INTRON	0	A	G	G	0.1282	5	34	-1.5	3.56261e-07	-
10	1	2R_5701127_SNP	FBgn0033446	CG1648	INTRON	0	C	T	T	0.1282	5	34	-1.5	3.56261e-07	-
10	1	2R_5701142_DEL	FBgn0033446	CG1648	INTRON	0	G	AA	AA	0.15	6	34	-1.357	8.01205e-07	-
10	1	3L_14266278_DEL	Intergenic	Intergenic			C	CT	CT	0.1538	6	33	-1.479	1.85157e-08	(TF_binding_site|BDTNP1_TFBS_dl|FBsf0000307417);(TF_binding_site|mE1_TFBS_Trl|FBsf0000339963)
10	1	3L_2644168_SNP	FBgn0035358	CG14949	UPSTREAM	744	T	A	A	0.2051	8	31	-1.195	1.48014e-06	-
10	1	3L_561925_INS	FBgn0035142	hipk	INTRON	0	TTT	T	T	0.1026	4	35	-1.587	1.54018e-06	(TF_binding_site|BDTNP1_TFBS_twi|FBsf0000202575);(TF_binding_site|mE1_TFBS_HSA|FBsf0000360763)
10	1	3R_15859412_SNP	FBgn0038768	CG4936	INTRON	0	T	C	C	0.25	10	30	-1.158	1.83799e-07	-
10	1	3R_15859412_SNP	FBgn0038769	CG10889	DOWNSTREAM	191	T	C	C	0.25	10	30	-1.158	1.83799e-07	-
10	1	X_11097675_SNP	FBgn0030280	CG11106	DOWNSTREAM	836	T	A	A	0.1282	5	34	-1.457	1.02511e-06	-
10	1	X_11097681_SNP	FBgn0030280	CG11106	DOWNSTREAM	842	C	T	T	0.1282	5	34	-1.457	1.02511e-06	-
10	1	X_11097689_DEL	FBgn0030280	CG11106	DOWNSTREAM	851	T	TATTTTAATTGATTAAGATATGCT	TATTTTAATTGATTAAGATATGCT	0.1282	5	34	-1.457	1.02511e-06	-
10	1	X_11097716_SNP	FBgn0030280	CG11106	DOWNSTREAM	877	C	T	T	0.1282	5	34	-1.457	1.02511e-06	-
10	1	X_11097722_SNP	FBgn0030280	CG11106	DOWNSTREAM	883	T	G	G	0.1282	5	34	-1.457	1.02511e-06	-
10	1	X_11097725_SNP	FBgn0030280	CG11106	DOWNSTREAM	886	T	C	C	0.1282	5	34	-1.457	1.02511e-06	-
10	1	X_6114149_SNP	FBgn0029849	Efr	UPSTREAM	139	T	C	C	0.1026	4	35	-1.59	1.43136e-06	(TF_binding_site|BDTNP1_TFBS_dl|FBsf0000316969);(TF_binding_site|BDTNP1_TFBS_Med|FBsf0000287867);(TF_binding_site|mE1_TFBS_cnc|FBsf0000206770);(TF_binding_site|mE1_TFBS_HSA|FBsf0000379771);(TF_binding_site|mE1_TFBS_Trl|FBsf0000342471)
10	1	X_6114149_SNP	FBgn0029848	Btd	UPSTREAM	789	T	C	C	0.1026	4	35	-1.59	1.43136e-06	(TF_binding_site|BDTNP1_TFBS_dl|FBsf0000316969);(TF_binding_site|BDTNP1_TFBS_Med|FBsf0000287867);(TF_binding_site|mE1_TFBS_cnc|FBsf0000206770);(TF_binding_site|mE1_TFBS_HSA|FBsf0000379771);(TF_binding_site|mE1_TFBS_Trl|FBsf0000342471)
10	1	X_9229989_SNP	FBgn0085478	CG34449	INTRON	0	A	G	G	0.1842	7	31	-1.267	1.25467e-06	-
10	2	3L_20672283_SNP	Intergenic	Intergenic			T	C	C	0.2432	9	28	0.6901	9.59619e-07	(regulatory_region|REDfly_CRMs|FBsf0000435983);(TF_binding_site|BDTNP1_TFBS_da|FBsf0000327732);(TF_binding_site|BDTNP1_TFBS_dl|FBsf0000308832);(TF_binding_site|BDTNP1_TFBS_Med|FBsf0000283790);(TF_binding_site|BDTNP1_TFBS_sna|FBsf0000269650);(TF_binding_site|BDTNP1_TFBS_twi|FBsf0000204391);(TF_binding_site|mE1_TFBS_HSA|FBsf0000367264)
10	2	3R_16431869_SNP	FBgn0023097	bon	INTRON	0	G	A	A	0.3421	13	25	-0.5806	1.89405e-06	-
10	2	3R_25271769_SNP	FBgn0004369	Ptp99A	INTRON	0	T	C	T	0.275	11	29	0.6711	1.32305e-07	-
10	2	3R_26809250_INS	FBgn0004573	5-HT7	INTRON	0	AGAA	A	A	0.2432	9	28	0.6882	1.05745e-06	-
10	2	3R_26825132_SNP	FBgn0004573	5-HT7	INTRON	0	T	G	G	0.2564	10	29	0.6462	2.00444e-06	-
11	2	X_10190960_SNP	FBgn0259170	alpha-Man-I	INTRON	0	T	C	T	0.1842	7	31	1.32	7.0067e-07	-
11	3	3R_22454678_SNP	FBgn0039439	TwdlK	UPSTREAM	232	A	G	G	0.1944	7	29	-0.9332	1.56899e-06	(TF_binding_site|mE1_TFBS_chinmo|FBsf0000213381)
11	3	3R_22454678_SNP	FBgn0039440	TwdlJ	UPSTREAM	962	A	G	G	0.1944	7	29	-0.9332	1.56899e-06	(TF_binding_site|mE1_TFBS_chinmo|FBsf0000213381)
11	3	X_10762442_SNP	FBgn0030244	CG2157	UPSTREAM	875	G	A	G	0.4872	19	20	-0.7506	5.32706e-07	-
11	3	X_4850465_SNP	FBgn0266096	CR44833	DOWNSTREAM	214	G	T	G	0.3514	13	24	-0.8147	2.9348e-07	(TF_binding_site|mE1_TFBS_kn|FBsf0000336741)
11	3	X_4850465_SNP	FBgn0004368	Ptp4E	DOWNSTREAM	516	G	T	G	0.3514	13	24	-0.8147	2.9348e-07	(TF_binding_site|mE1_TFBS_kn|FBsf0000336741)
11	3	X_4850762_SNP	FBgn0266096	CR44833	INTRON	0	A	G	G	0.3611	13	23	-0.7958	1.14469e-06	-
11	3	X_4850762_SNP	FBgn0004368	Ptp4E	DOWNSTREAM	813	A	G	G	0.3611	13	23	-0.7958	1.14469e-06	-
11	4	3R_13962625_SNP	Intergenic	Intergenic			G	C	C	0.4737	18	20	0.681	2.0385e-06	-
11	5	2L_10604443_SNP	FBgn0051721	Trim9	INTRON	0	T	C	C	0.4615	18	21	0.6325	1.75639e-06	(TF_binding_site|BDTNP1_TFBS_twi|FBsf0000201436);(TF_binding_site|mE1_TFBS_HSA|FBsf0000347458)
11	5	2L_15437940_SNP	Intergenic	Intergenic			C	A	C	0.4118	14	20	-0.7062	9.87063e-07	-
12	1	2L_16382878_INS	Intergenic	Intergenic			AT	A	A	0.2821	11	28	1.186	1.28817e-06	-
12	1	3R_13307031_SNP	FBgn0261046	Dscam3	INTRON	0	A	G	G	0.1282	5	34	1.599	1.24136e-06	-
12	1	X_7426915_SNP	FBgn0052719	CG32719	INTRON	0	G	A	A	0.2	8	32	1.323	1.16658e-06	-
12	1	X_7426941_SNP	FBgn0052719	CG32719	INTRON	0	C	T	T	0.1795	7	32	1.373	2.07027e-06	-
12	1	X_7427130_SNP	FBgn0052719	CG32719	INTRON	0	A	G	G	0.2051	8	31	1.308	1.88038e-06	-
12	3	3R_26486720_SNP	Intergenic	Intergenic			A	C	C	0.4474	17	21	-0.5485	5.98479e-07	(TF_binding_site|BDTNP1_TFBS_twi|FBsf0000266468);(TF_binding_site|mE1_TFBS_HSA|FBsf0000376771);(TF_binding_site|mE1_TFBS_sbb|FBsf0000251122)
12	3	3R_9608715_SNP	FBgn0000454	Dip-B	INTRON	0	T	C	T	0.3077	12	27	-0.5585	1.36398e-06	-
12	3	3R_9608715_SNP	FBgn0038183	CG9286	DOWNSTREAM	911	T	C	T	0.3077	12	27	-0.5585	1.36398e-06	-
12	3	3R_9608721_SNP	FBgn0000454	Dip-B	INTRON	0	A	C	A	0.3077	12	27	-0.5585	1.36398e-06	-
12	3	3R_9608721_SNP	FBgn0038183	CG9286	DOWNSTREAM	917	A	C	A	0.3077	12	27	-0.5585	1.36398e-06	-
12	3	3R_9608722_SNP	FBgn0000454	Dip-B	INTRON	0	T	A	T	0.3077	12	27	-0.5585	1.36398e-06	-
12	3	3R_9608722_SNP	FBgn0038183	CG9286	DOWNSTREAM	918	T	A	T	0.3077	12	27	-0.5585	1.36398e-06	-
13	2	2L_2703068_SNP	FBgn0051690	CG31690	INTRON	0	G	A	G	0.2895	11	27	-0.9939	1.79154e-06	-
13	2	2R_15273177_SNP	FBgn0034441	CG10081	UPSTREAM	251	T	A	T	0.3333	11	22	-1.024	1.91712e-06	-
13	2	2R_15273177_SNP	FBgn0034440	CG10073	DOWNSTREAM	707	T	A	T	0.3333	11	22	-1.024	1.91712e-06	-
13	3	3R_17986573_SNP	FBgn0051163	SKIP	INTRON	0	T	G	G	0.275	11	29	-0.9294	7.64292e-07	(TF_binding_site|mE1_TFBS_Kr|FBsf0000253807)
13	3	3R_17986615_SNP	FBgn0051163	SKIP	INTRON	0	G	A	A	0.275	11	29	-0.9294	7.64292e-07	(TF_binding_site|mE1_TFBS_Kr|FBsf0000253807)
13	3	3R_17986638_SNP	FBgn0051163	SKIP	INTRON	0	G	A	A	0.275	11	29	-0.9294	7.64292e-07	(TF_binding_site|mE1_TFBS_Kr|FBsf0000253807)
13	3	3R_17987947_SNP	FBgn0051163	SKIP	INTRON	0	G	A	A	0.1622	6	31	-1.154	1.24788e-06	(TF_binding_site|BDTNP1_TFBS_da|FBsf0000330138);(TF_binding_site|BDTNP1_TFBS_dl|FBsf0000313372);(TF_binding_site|BDTNP1_TFBS_twi|FBsf0000265762);(TF_binding_site|mE1_TFBS_HSA|FBsf0000374044)
13	5	2R_7807911_SNP	Intergenic	Intergenic			G	A	A	0.2286	8	27	-0.7322	8.30764e-07	-
13	5	3L_782227_SNP	Intergenic	Intergenic			T	C	C	0.359	14	25	-0.5998	1.34632e-06	(TF_binding_site|BDTNP1_TFBS_da|FBsf0000325648);(TF_binding_site|BDTNP1_TFBS_sna|FBsf0000268969)
13	5	3L_782232_SNP	Intergenic	Intergenic			A	C	C	0.359	14	25	-0.5998	1.34632e-06	(TF_binding_site|BDTNP1_TFBS_da|FBsf0000325648);(TF_binding_site|BDTNP1_TFBS_sna|FBsf0000268969)
13	5	X_7771678_SNP	FBgn0259190	Ir7d	NON_SYNONYMOUS_CODING	0	G	C	C	0.1026	4	35	-0.962	6.00979e-07	-
13	5	X_7771678_SNP	FBgn0029966	Ir7c	DOWNSTREAM	798	G	C	C	0.1026	4	35	-0.962	6.00979e-07	-
13	6	3L_16064997_SNP	FBgn0005536	Mbs	INTRON	0	G	T	T	0.3889	14	22	0.5304	2.12349e-06	-
13	6	3L_2446210_INS	FBgn0266696	CG45186	INTRON	0	GCAG	G	G	0.2821	11	28	0.5683	8.12858e-07	(TF_binding_site|mE1_TFBS_cad|FBsf0000244054)
13	6	3R_5735409_SNP	FBgn0267336	Glut4EF	INTRON	0	C	T	C	0.4865	18	19	0.5181	1.29884e-06	(TF_binding_site|mE1_TFBS_inv|FBsf0000237080)
14	2	3R_17774505_SNP	FBgn0264490	Eip93F	UPSTREAM	331	T	G	G	0.4	16	24	0.7998	1.20325e-06	(TF_binding_site|BDTNP1_TFBS_da|FBsf0000330114);(TF_binding_site|BDTNP1_TFBS_dl|FBsf0000313323);(TF_binding_site|BDTNP1_TFBS_hb|FBsf0000292692);(TF_binding_site|BDTNP1_TFBS_twi|FBsf0000265737);(TF_binding_site|BDTNP1_TFBS_z|FBsf0000197799);(TF_binding_site|mE1_TFBS_HSA|FBsf0000373980);(TF_binding_site|mE1_TFBS_Trl|FBsf0000341533)
14	2	3R_8820642_SNP	FBgn0038105	yellow-f2	INTRON	0	A	T	T	0.3784	14	23	0.8731	1.01262e-06	(TF_binding_site|mE1_TFBS_sens|FBsf0000231511)
14	2	3R_8820642_SNP	FBgn0038106	CG7488	UPSTREAM	700	A	T	T	0.3784	14	23	0.8731	1.01262e-06	(TF_binding_site|mE1_TFBS_sens|FBsf0000231511)
14	2	3R_8846177_SNP	FBgn0020496	CtBP	INTRON	0	C	G	G	0.4211	16	22	0.8774	2.82873e-07	-
14	3	2R_19602783_SNP	FBgn0034897	Sesn	INTRON	0	A	C	A	0.3158	12	26	-0.6122	8.83683e-07	-
14	3	2R_19602787_SNP	FBgn0034897	Sesn	INTRON	0	T	C	T	0.3077	12	27	-0.6089	9.143e-07	-
14	3	X_3321793_SNP	FBgn0266350	CR44999	INTRON	0	G	A	A	0.3333	13	26	0.5946	3.57485e-07	(TF_binding_site|BDTNP1_TFBS_dl|FBsf0000316303);(TF_binding_site|BDTNP1_TFBS_Med|FBsf0000287626);(TF_binding_site|BDTNP1_TFBS_prd|FBsf0000275915);(TF_binding_site|BDTNP1_TFBS_twi|FBsf0000204981);(TF_binding_site|mE1_TFBS_HSA|FBsf0000378848);(TF_binding_site|mE1_TFBS_Trl|FBsf0000342271)
14	3	X_3321793_SNP	FBgn0029657	CG12535	INTRON	0	G	A	A	0.3333	13	26	0.5946	3.57485e-07	(TF_binding_site|BDTNP1_TFBS_dl|FBsf0000316303);(TF_binding_site|BDTNP1_TFBS_Med|FBsf0000287626);(TF_binding_site|BDTNP1_TFBS_prd|FBsf0000275915);(TF_binding_site|BDTNP1_TFBS_twi|FBsf0000204981);(TF_binding_site|mE1_TFBS_HSA|FBsf0000378848);(TF_binding_site|mE1_TFBS_Trl|FBsf0000342271)
14	3	X_3321793_SNP	FBgn0052493	tRNA:CR32493	UPSTREAM	237	G	A	A	0.3333	13	26	0.5946	3.57485e-07	(TF_binding_site|BDTNP1_TFBS_dl|FBsf0000316303);(TF_binding_site|BDTNP1_TFBS_Med|FBsf0000287626);(TF_binding_site|BDTNP1_TFBS_prd|FBsf0000275915);(TF_binding_site|BDTNP1_TFBS_twi|FBsf0000204981);(TF_binding_site|mE1_TFBS_HSA|FBsf0000378848);(TF_binding_site|mE1_TFBS_Trl|FBsf0000342271)
14	3	X_3321799_INS	FBgn0266350	CR44999	INTRON	0	TATACT	T	T	0.3333	13	26	0.5766	1.27027e-06	(TF_binding_site|BDTNP1_TFBS_dl|FBsf0000316303);(TF_binding_site|BDTNP1_TFBS_Med|FBsf0000287626);(TF_binding_site|BDTNP1_TFBS_prd|FBsf0000275915);(TF_binding_site|BDTNP1_TFBS_twi|FBsf0000204981);(TF_binding_site|mE1_TFBS_HSA|FBsf0000378848);(TF_binding_site|mE1_TFBS_Trl|FBsf0000342271)
14	3	X_3321799_INS	FBgn0029657	CG12535	INTRON	0	TATACT	T	T	0.3333	13	26	0.5766	1.27027e-06	(TF_binding_site|BDTNP1_TFBS_dl|FBsf0000316303);(TF_binding_site|BDTNP1_TFBS_Med|FBsf0000287626);(TF_binding_site|BDTNP1_TFBS_prd|FBsf0000275915);(TF_binding_site|BDTNP1_TFBS_twi|FBsf0000204981);(TF_binding_site|mE1_TFBS_HSA|FBsf0000378848);(TF_binding_site|mE1_TFBS_Trl|FBsf0000342271)
14	3	X_3321799_INS	FBgn0052493	tRNA:CR32493	UPSTREAM	244	TATACT	T	T	0.3333	13	26	0.5766	1.27027e-06	(TF_binding_site|BDTNP1_TFBS_dl|FBsf0000316303);(TF_binding_site|BDTNP1_TFBS_Med|FBsf0000287626);(TF_binding_site|BDTNP1_TFBS_prd|FBsf0000275915);(TF_binding_site|BDTNP1_TFBS_twi|FBsf0000204981);(TF_binding_site|mE1_TFBS_HSA|FBsf0000378848);(TF_binding_site|mE1_TFBS_Trl|FBsf0000342271)
14	3	X_3321832_SNP	FBgn0029657	CG12535	INTRON	0	T	A	A	0.35	14	26	0.5738	6.05867e-07	(TF_binding_site|BDTNP1_TFBS_dl|FBsf0000316303);(TF_binding_site|BDTNP1_TFBS_Med|FBsf0000287626);(TF_binding_site|BDTNP1_TFBS_prd|FBsf0000275915);(TF_binding_site|BDTNP1_TFBS_twi|FBsf0000204981);(TF_binding_site|mE1_TFBS_HSA|FBsf0000378848);(TF_binding_site|mE1_TFBS_Trl|FBsf0000342271)
14	3	X_3321832_SNP	FBgn0266350	CR44999	INTRON	0	T	A	A	0.35	14	26	0.5738	6.05867e-07	(TF_binding_site|BDTNP1_TFBS_dl|FBsf0000316303);(TF_binding_site|BDTNP1_TFBS_Med|FBsf0000287626);(TF_binding_site|BDTNP1_TFBS_prd|FBsf0000275915);(TF_binding_site|BDTNP1_TFBS_twi|FBsf0000204981);(TF_binding_site|mE1_TFBS_HSA|FBsf0000378848);(TF_binding_site|mE1_TFBS_Trl|FBsf0000342271)
14	3	X_3321832_SNP	FBgn0052493	tRNA:CR32493	UPSTREAM	276	T	A	A	0.35	14	26	0.5738	6.05867e-07	(TF_binding_site|BDTNP1_TFBS_dl|FBsf0000316303);(TF_binding_site|BDTNP1_TFBS_Med|FBsf0000287626);(TF_binding_site|BDTNP1_TFBS_prd|FBsf0000275915);(TF_binding_site|BDTNP1_TFBS_twi|FBsf0000204981);(TF_binding_site|mE1_TFBS_HSA|FBsf0000378848);(TF_binding_site|mE1_TFBS_Trl|FBsf0000342271)
14	3	X_3321855_DEL	FBgn0029657	CG12535	INTRON	0	G	GAGCATCGAATTAATTAGT	GAGCATCGAATTAATTAGT	0.3333	13	26	0.5766	1.27027e-06	(TF_binding_site|BDTNP1_TFBS_dl|FBsf0000316303);(TF_binding_site|BDTNP1_TFBS_Med|FBsf0000287626);(TF_binding_site|BDTNP1_TFBS_prd|FBsf0000275915);(TF_binding_site|BDTNP1_TFBS_twi|FBsf0000204981);(TF_binding_site|mE1_TFBS_HSA|FBsf0000378848);(TF_binding_site|mE1_TFBS_Trl|FBsf0000342271)
14	3	X_3321855_DEL	FBgn0266350	CR44999	INTRON	0	G	GAGCATCGAATTAATTAGT	GAGCATCGAATTAATTAGT	0.3333	13	26	0.5766	1.27027e-06	(TF_binding_site|BDTNP1_TFBS_dl|FBsf0000316303);(TF_binding_site|BDTNP1_TFBS_Med|FBsf0000287626);(TF_binding_site|BDTNP1_TFBS_prd|FBsf0000275915);(TF_binding_site|BDTNP1_TFBS_twi|FBsf0000204981);(TF_binding_site|mE1_TFBS_HSA|FBsf0000378848);(TF_binding_site|mE1_TFBS_Trl|FBsf0000342271)
14	3	X_3321855_DEL	FBgn0052493	tRNA:CR32493	UPSTREAM	300	G	GAGCATCGAATTAATTAGT	GAGCATCGAATTAATTAGT	0.3333	13	26	0.5766	1.27027e-06	(TF_binding_site|BDTNP1_TFBS_dl|FBsf0000316303);(TF_binding_site|BDTNP1_TFBS_Med|FBsf0000287626);(TF_binding_site|BDTNP1_TFBS_prd|FBsf0000275915);(TF_binding_site|BDTNP1_TFBS_twi|FBsf0000204981);(TF_binding_site|mE1_TFBS_HSA|FBsf0000378848);(TF_binding_site|mE1_TFBS_Trl|FBsf0000342271)
14	4	2L_3665974_SNP	FBgn0085369	CG34340	INTRON	0	T	C	C	0.1	4	36	-0.6587	3.05715e-07	-
14	4	2L_3666101_SNP	FBgn0085369	CG34340	INTRON	0	T	C	C	0.1	4	36	-0.6587	3.05715e-07	-
14	4	2L_3666159_SNP	FBgn0085369	CG34340	INTRON	0	A	T	T	0.1053	4	34	-0.6721	1.52244e-07	-
14	4	2L_3666222_SNP	FBgn0085369	CG34340	INTRON	0	T	A	A	0.1538	6	33	-0.5272	1.88087e-06	-
14	4	2L_5624434_SNP	FBgn0031726	Cyp6a16	UPSTREAM	672	C	T	T	0.1795	7	32	-0.5048	1.02086e-06	(TF_binding_site|mE1_TFBS_bab1|FBsf0000213992)
14	4	2L_5624441_SNP	FBgn0031726	Cyp6a16	UPSTREAM	679	G	C	C	0.1795	7	32	-0.5048	1.02086e-06	(TF_binding_site|mE1_TFBS_bab1|FBsf0000213992)
14	4	2L_6603123_SNP	Intergenic	Intergenic			A	G	G	0.1026	4	35	-0.6261	1.96731e-06	-
14	4	2L_9440826_SNP	FBgn0002973	numb	INTRON	0	A	G	G	0.1212	4	29	-0.649	8.32738e-07	-
14	4	2L_9440826_SNP	FBgn0053723	CG33723	UPSTREAM	86	A	G	G	0.1212	4	29	-0.649	8.32738e-07	-
14	4	2R_9538743_SNP	FBgn0000633	fas	INTRON	0	A	C	C	0.2368	9	29	-0.465	7.86697e-07	-
14	4	3L_1108251_SNP	Intergenic	Intergenic			T	G	T	0.225	9	31	-0.4559	1.19344e-06	(TF_binding_site|BDTNP1_TFBS_da|FBsf0000325692);(TF_binding_site|BDTNP1_TFBS_dl|FBsf0000304925);(TF_binding_site|BDTNP1_TFBS_twi|FBsf0000202648)
14	4	3L_13549446_SNP	FBgn0264001	bru-3	INTRON	0	C	G	C	0.2	8	32	-0.4876	5.05736e-07	-
14	4	3R_14465906_SNP	FBgn0263974	qin	INTRON	0	C	T	T	0.125	5	35	-0.587	6.0138e-07	-
14	4	3R_14465906_SNP	FBgn0038632	CG14301	INTRON	0	C	T	T	0.125	5	35	-0.587	6.0138e-07	-
14	4	3R_14889428_SNP	FBgn0004876	cdi	INTRON	0	A	G	G	0.1	4	36	-0.6587	3.05715e-07	-
14	4	3R_5422851_SNP	FBgn0037720	CG8312	INTRON	0	T	G	G	0.1081	4	33	-0.6262	2.1572e-06	(TF_binding_site|BDTNP1_TFBS_dl|FBsf0000310737);(TF_binding_site|BDTNP1_TFBS_twi|FBsf0000264595);(TF_binding_site|mE1_TFBS_cad|FBsf0000247996)
14	4	3R_9736544_SNP	Intergenic	Intergenic			A	G	G	0.4211	16	22	-0.381	1.60838e-06	(regulatory_region|REDfly_CRMs|FBsf0000435095);(regulatory_region|REDfly_CRMs|FBsf0000436150);(TF_binding_site|BDTNP1_TFBS_bcd|FBsf0000334233);(TF_binding_site|BDTNP1_TFBS_da|FBsf0000329135);(TF_binding_site|BDTNP1_TFBS_dl|FBsf0000311550);(TF_binding_site|BDTNP1_TFBS_gt|FBsf0000294401);(TF_binding_site|BDTNP1_TFBS_hb|FBsf0000292469);(TF_binding_site|BDTNP1_TFBS_Med|FBsf0000285247);(TF_binding_sit…
14	4	X_11364179_SNP	FBgn0262685	CG43155	INTRON	0	T	G	G	0.1795	7	32	-0.4942	2.07527e-06	-
15	1	2L_7996015_SNP	FBgn0266331	CR44996	EXON	0	G	C	C	0.1842	7	31	-2.231	9.81663e-07	(TF_binding_site|mE1_TFBS_chinmo|FBsf0000207448)
15	1	2L_7996015_SNP	FBgn0031970	CG7227	SYNONYMOUS_CODING	0	G	C	C	0.1842	7	31	-2.231	9.81663e-07	(TF_binding_site|mE1_TFBS_chinmo|FBsf0000207448)
15	2	3R_9640768_DEL	FBgn0263650	CR43641	UPSTREAM	232	T	TCGGGCAACGCTGAT	TCGGGCAACGCTGAT	0.3684	14	24	-1.041	2.41921e-07	(TF_binding_site|BDTNP1_TFBS_dl|FBsf0000311522);(TF_binding_site|mE1_TFBS_D|FBsf0000239927);(TF_binding_site|mE1_TFBS_HSA|FBsf0000371329);(TF_binding_site|mE1_TFBS_Trl|FBsf0000341007)
15	2	3R_9640768_DEL	FBgn0259731	tal-2A	DOWNSTREAM	399	T	TCGGGCAACGCTGAT	TCGGGCAACGCTGAT	0.3684	14	24	-1.041	2.41921e-07	(TF_binding_site|BDTNP1_TFBS_dl|FBsf0000311522);(TF_binding_site|mE1_TFBS_D|FBsf0000239927);(TF_binding_site|mE1_TFBS_HSA|FBsf0000371329);(TF_binding_site|mE1_TFBS_Trl|FBsf0000341007)
15	2	3R_9640768_DEL	FBgn0259733	tal-AA	DOWNSTREAM	399	T	TCGGGCAACGCTGAT	TCGGGCAACGCTGAT	0.3684	14	24	-1.041	2.41921e-07	(TF_binding_site|BDTNP1_TFBS_dl|FBsf0000311522);(TF_binding_site|mE1_TFBS_D|FBsf0000239927);(TF_binding_site|mE1_TFBS_HSA|FBsf0000371329);(TF_binding_site|mE1_TFBS_Trl|FBsf0000341007)
15	2	3R_9640768_DEL	FBgn0259730	tal-1A	DOWNSTREAM	399	T	TCGGGCAACGCTGAT	TCGGGCAACGCTGAT	0.3684	14	24	-1.041	2.41921e-07	(TF_binding_site|BDTNP1_TFBS_dl|FBsf0000311522);(TF_binding_site|mE1_TFBS_D|FBsf0000239927);(TF_binding_site|mE1_TFBS_HSA|FBsf0000371329);(TF_binding_site|mE1_TFBS_Trl|FBsf0000341007)
15	2	3R_9640768_DEL	FBgn0259732	tal-3A	DOWNSTREAM	399	T	TCGGGCAACGCTGAT	TCGGGCAACGCTGAT	0.3684	14	24	-1.041	2.41921e-07	(TF_binding_site|BDTNP1_TFBS_dl|FBsf0000311522);(TF_binding_site|mE1_TFBS_D|FBsf0000239927);(TF_binding_site|mE1_TFBS_HSA|FBsf0000371329);(TF_binding_site|mE1_TFBS_Trl|FBsf0000341007)
15	2	3R_9640842_SNP	FBgn0263650	CR43641	UPSTREAM	159	C	T	T	0.359	14	25	-0.9949	1.55856e-06	(TF_binding_site|BDTNP1_TFBS_dl|FBsf0000311522);(TF_binding_site|mE1_TFBS_D|FBsf0000239927);(TF_binding_site|mE1_TFBS_HSA|FBsf0000371329);(TF_binding_site|mE1_TFBS_sens|FBsf0000231606);(TF_binding_site|mE1_TFBS_Trl|FBsf0000341007)
15	2	3R_9640842_SNP	FBgn0259730	tal-1A	DOWNSTREAM	472	C	T	T	0.359	14	25	-0.9949	1.55856e-06	(TF_binding_site|BDTNP1_TFBS_dl|FBsf0000311522);(TF_binding_site|mE1_TFBS_D|FBsf0000239927);(TF_binding_site|mE1_TFBS_HSA|FBsf0000371329);(TF_binding_site|mE1_TFBS_sens|FBsf0000231606);(TF_binding_site|mE1_TFBS_Trl|FBsf0000341007)
15	2	3R_9640842_SNP	FBgn0259733	tal-AA	DOWNSTREAM	472	C	T	T	0.359	14	25	-0.9949	1.55856e-06	(TF_binding_site|BDTNP1_TFBS_dl|FBsf0000311522);(TF_binding_site|mE1_TFBS_D|FBsf0000239927);(TF_binding_site|mE1_TFBS_HSA|FBsf0000371329);(TF_binding_site|mE1_TFBS_sens|FBsf0000231606);(TF_binding_site|mE1_TFBS_Trl|FBsf0000341007)
15	2	3R_9640842_SNP	FBgn0259732	tal-3A	DOWNSTREAM	472	C	T	T	0.359	14	25	-0.9949	1.55856e-06	(TF_binding_site|BDTNP1_TFBS_dl|FBsf0000311522);(TF_binding_site|mE1_TFBS_D|FBsf0000239927);(TF_binding_site|mE1_TFBS_HSA|FBsf0000371329);(TF_binding_site|mE1_TFBS_sens|FBsf0000231606);(TF_binding_site|mE1_TFBS_Trl|FBsf0000341007)
15	2	3R_9640842_SNP	FBgn0259731	tal-2A	DOWNSTREAM	472	C	T	T	0.359	14	25	-0.9949	1.55856e-06	(TF_binding_site|BDTNP1_TFBS_dl|FBsf0000311522);(TF_binding_site|mE1_TFBS_D|FBsf0000239927);(TF_binding_site|mE1_TFBS_HSA|FBsf0000371329);(TF_binding_site|mE1_TFBS_sens|FBsf0000231606);(TF_binding_site|mE1_TFBS_Trl|FBsf0000341007)
15	3	2R_14141778_SNP	Intergenic	Intergenic			T	G	G	0.175	7	33	0.9627	1.63147e-06	(TF_binding_site|BDTNP1_TFBS_da|FBsf0000324635);(TF_binding_site|BDTNP1_TFBS_dl|FBsf0000302987);(TF_binding_site|BDTNP1_TFBS_twi|FBsf0000199720);(TF_binding_site|mE1_TFBS_HSA|FBsf0000358024)
15	3	3L_8641665_SNP	FBgn0035922	Pex7	INTRON	0	A	G	G	0.225	9	31	0.9185	3.72429e-07	(TF_binding_site|mE1_TFBS_chinmo|FBsf0000209986)
15	3	3L_8641665_SNP	FBgn0000121	Arr2	SYNONYMOUS_CODING	0	A	G	G	0.225	9	31	0.9185	3.72429e-07	(TF_binding_site|mE1_TFBS_chinmo|FBsf0000209986)
15	3	3L_9078143_SNP	FBgn0023479	Tequila	INTRON	0	T	C	T	0.35	14	26	0.7669	1.81684e-06	-
15	4	2L_15846594_SNP	FBgn0264263	CR43763	UPSTREAM	360	C	A	C	0.359	14	25	-0.6912	1.10786e-06	-
15	4	2L_17617403_SNP	Intergenic	Intergenic			C	T	T	0.2632	10	28	0.7912	3.48673e-07	-
15	4	2R_15736370_SNP	Intergenic	Intergenic			C	G	G	0.4615	18	21	0.6605	1.39998e-06	-
15	4	2R_19399496_SNP	FBgn0034871	CG3906	SYNONYMOUS_CODING	0	G	A	A	0.275	11	29	0.7388	8.44612e-07	(TF_binding_site|mE1_TFBS_cad|FBsf0000247346)
15	4	3R_12684561_SNP	FBgn0264857	iab-8	INTRON	0	G	C	C	0.2564	10	29	0.7775	5.92444e-07	(TF_binding_site|BDTNP1_TFBS_da|FBsf0000329593);(TF_binding_site|BDTNP1_TFBS_dl|FBsf0000312285);(TF_binding_site|BDTNP1_TFBS_Med|FBsf0000285664);(TF_binding_site|BDTNP1_TFBS_prd|FBsf0000276630);(TF_binding_site|BDTNP1_TFBS_twi|FBsf0000265257);(TF_binding_site|mE1_TFBS_cad|FBsf0000248578)
15	4	3R_12684998_SNP	FBgn0264857	iab-8	INTRON	0	A	G	G	0.2105	8	30	0.8466	5.03893e-07	(TF_binding_site|BDTNP1_TFBS_da|FBsf0000329593);(TF_binding_site|BDTNP1_TFBS_dl|FBsf0000312286);(TF_binding_site|BDTNP1_TFBS_Med|FBsf0000285664);(TF_binding_site|BDTNP1_TFBS_prd|FBsf0000276630);(TF_binding_site|BDTNP1_TFBS_twi|FBsf0000265257);(TF_binding_site|mE1_TFBS_cad|FBsf0000248578);(TF_binding_site|mE1_TFBS_HSA|FBsf0000372412)
15	5	2R_13445228_SNP	FBgn0263076	Klp54D	INTRON	0	T	C	T	0.3684	14	24	0.5281	5.55199e-07	-
15	6	2R_11243727_SNP	FBgn0034013	unc-5	INTRON	0	A	T	T	0.475	19	21	0.4375	9.33561e-07	(TF_binding_site|BDTNP1_TFBS_da|FBsf0000324320);(TF_binding_site|BDTNP1_TFBS_dl|FBsf0000302330);(TF_binding_site|BDTNP1_TFBS_gt|FBsf0000293523);(TF_binding_site|BDTNP1_TFBS_Med|FBsf0000280443);(TF_binding_site|BDTNP1_TFBS_sna|FBsf0000267773);(TF_binding_site|BDTNP1_TFBS_twi|FBsf0000199459);(TF_binding_site|mE1_TFBS_cad|FBsf0000246720);(TF_binding_site|mE1_TFBS_sens|FBsf0000228169)
15	6	X_5551022_SNP	FBgn0259150	CG42265	INTRON	0	A	C	C	0.2564	10	29	-0.5172	9.81465e-07	-
16	1	2L_11462153_SNP	Intergenic	Intergenic			A	G	G	0.4595	17	20	-1.293	5.59481e-07	-
16	1	3L_13885704_SNP	FBgn0264006	dysc	INTRON	0	A	T	T	0.3	12	28	1.312	1.44976e-06	-
16	2	2R_7077536_SNP	FBgn0003396	shn	INTRON	0	A	C	C	0.4412	15	19	0.75	2.26099e-07	(TF_binding_site|BDTNP1_TFBS_dl|FBsf0000301302);(TF_binding_site|BDTNP1_TFBS_Med|FBsf0000279881);(TF_binding_site|BDTNP1_TFBS_twi|FBsf0000199026)
16	2	3L_10992632_SNP	FBgn0013469	klu	INTRON	0	T	G	T	0.3333	11	22	-0.7935	4.85942e-07	-
16	5	3L_18262321_SNP	Intergenic	Intergenic			C	T	T	0.4359	17	22	-0.451	4.49792e-07	(TF_binding_site|BDTNP1_TFBS_twi|FBsf0000204178);(TF_binding_site|mE1_TFBS_HSA|FBsf0000366491)
16	5	3L_18262347_SNP	Intergenic	Intergenic			C	T	T	0.4211	16	22	-0.4457	1.25148e-06	(TF_binding_site|BDTNP1_TFBS_twi|FBsf0000204178);(TF_binding_site|mE1_TFBS_HSA|FBsf0000366491)
17	1	2L_1859639_SNP	FBgn0051663	CG31663	INTRON	0	T	A	T	0.225	9	31	1.901	1.81302e-06	-
17	1	2L_4590721_SNP	FBgn0053196	dp	INTRON	0	A	T	T	0.1842	7	31	2.141	8.86467e-07	-
17	1	2R_13149089_SNP	FBgn0265487	mbl	INTRON	0	T	A	A	0.1282	5	34	2.39	2.10501e-06	(TF_binding_site|BDTNP1_TFBS_dl|FBsf0000302719);(TF_binding_site|BDTNP1_TFBS_z|FBsf0000196654);(TF_binding_site|mE1_TFBS_HSA|FBsf0000357667);(TF_binding_site|mE1_TFBS_Trl|FBsf0000338773)
17	1	3L_10594631_SNP	Intergenic	Intergenic			T	G	T	0.1795	7	32	2.119	9.39233e-07	-
17	1	3L_10594643_SNP	Intergenic	Intergenic			G	A	G	0.1795	7	32	2.119	9.39233e-07	-
17	1	3L_10594659_SNP	Intergenic	Intergenic			T	G	T	0.175	7	33	2.128	7.27211e-07	-
17	1	3L_12533569_SNP	FBgn0036302	sowah	INTRON	0	G	A	A	0.125	4	28	2.67	1.61844e-06	-
17	1	3R_10496188_SNP	FBgn0265140	Meltrin	INTRON	0	T	C	C	0.125	5	35	2.422	1.21828e-06	(TF_binding_site|mE1_TFBS_cad|FBsf0000248376)
17	1	3R_10496438_SNP	FBgn0265140	Meltrin	SYNONYMOUS_CODING	0	A	G	G	0.1538	6	33	2.353	2.38865e-07	(TF_binding_site|mE1_TFBS_cad|FBsf0000248376)
17	1	3R_10496714_SNP	FBgn0265140	Meltrin	INTRON	0	T	C	C	0.125	5	35	2.422	1.21828e-06	(TF_binding_site|mE1_TFBS_cad|FBsf0000248376);(TF_binding_site|mE1_TFBS_HSA|FBsf0000371626)
17	1	3R_10496935_SNP	FBgn0265140	Meltrin	INTRON	0	A	G	G	0.125	5	35	2.422	1.21828e-06	(TF_binding_site|BDTNP1_TFBS_twi|FBsf0000265010);(TF_binding_site|mE1_TFBS_cad|FBsf0000248376)
17	1	3R_10497430_SNP	FBgn0265140	Meltrin	SYNONYMOUS_CODING	0	G	A	A	0.125	5	35	2.422	1.21828e-06	(TF_binding_site|BDTNP1_TFBS_prd|FBsf0000276532);(TF_binding_site|BDTNP1_TFBS_twi|FBsf0000265010);(TF_binding_site|mE1_TFBS_cad|FBsf0000248376);(TF_binding_site|mE1_TFBS_HSA|FBsf0000371627)
17	1	3R_10498034_SNP	FBgn0265140	Meltrin	INTRON	0	C	T	T	0.125	5	35	2.422	1.21828e-06	(TF_binding_site|BDTNP1_TFBS_twi|FBsf0000265010);(TF_binding_site|mE1_TFBS_cad|FBsf0000248376);(TF_binding_site|mE1_TFBS_HSA|FBsf0000371627);(TF_binding_site|mE1_TFBS_HSA|FBsf0000371628)
17	1	3R_10498108_SNP	FBgn0265140	Meltrin	INTRON	0	C	T	T	0.125	5	35	2.422	1.21828e-06	(TF_binding_site|BDTNP1_TFBS_prd|FBsf0000276533);(TF_binding_site|BDTNP1_TFBS_twi|FBsf0000265010);(TF_binding_site|mE1_TFBS_cad|FBsf0000248376);(TF_binding_site|mE1_TFBS_HSA|FBsf0000371627);(TF_binding_site|mE1_TFBS_HSA|FBsf0000371628)
17	1	3R_10498346_SNP	FBgn0265140	Meltrin	INTRON	0	G	C	C	0.125	5	35	2.422	1.21828e-06	(TF_binding_site|mE1_TFBS_cad|FBsf0000248376);(TF_binding_site|mE1_TFBS_HSA|FBsf0000371628)
17	1	3R_10498590_SNP	FBgn0265140	Meltrin	INTRON	0	T	A	A	0.1282	5	34	2.399	1.74189e-06	(TF_binding_site|mE1_TFBS_cad|FBsf0000248376);(TF_binding_site|mE1_TFBS_HSA|FBsf0000371628)
17	1	3R_10498683_SNP	FBgn0265140	Meltrin	INTRON	0	C	G	G	0.125	5	35	2.422	1.21828e-06	(TF_binding_site|mE1_TFBS_cad|FBsf0000248376);(TF_binding_site|mE1_TFBS_D|FBsf0000239946);(TF_binding_site|mE1_TFBS_HSA|FBsf0000371628)
17	1	3R_10498743_DEL	FBgn0265140	Meltrin	INTRON	0	T	TT	TT	0.1282	5	34	2.393	2.0244e-06	(TF_binding_site|mE1_TFBS_cad|FBsf0000248376);(TF_binding_site|mE1_TFBS_D|FBsf0000239946);(TF_binding_site|mE1_TFBS_HSA|FBsf0000371628)
17	1	3R_3867761_SNP	FBgn0262362	CG43060	DOWNSTREAM	264	T	A	A	0.1	4	36	2.692	7.99791e-07	-
17	1	3R_3867773_DEL	FBgn0262362	CG43060	DOWNSTREAM	277	C	CTGTTTTTCTTGGCTTTGATTCCTCTTCGGCCGTCTGCTGCC	CTGTTTTTCTTGGCTTTGATTCCTCTTCGGCCGTCTGCTGCC	0.1026	4	35	2.669	1.18354e-06	-
17	2	2L_15806162_SNP	Intergenic	Intergenic			C	A	A	0.2564	10	29	0.913	1.86303e-07	-
17	2	2L_3895947_SNP	FBgn0000256	capu	INTRON	0	A	C	C	0.125	5	35	1.162	5.17147e-07	(TF_binding_site|mE1_TFBS_Trl|FBsf0000337166)
17	2	2L_5689709_SNP	FBgn0266066	CR44819	UPSTREAM	820	G	C	C	0.1026	4	35	1.233	2.10861e-06	-
17	2	2L_5689709_SNP	FBgn0266067	CR44820	DOWNSTREAM	821	G	C	C	0.1026	4	35	1.233	2.10861e-06	-
17	2	2L_5689724_SNP	FBgn0266066	CR44819	UPSTREAM	805	T	G	G	0.1026	4	35	1.233	2.10861e-06	-
17	2	2L_5689724_SNP	FBgn0266067	CR44820	DOWNSTREAM	806	T	G	G	0.1026	4	35	1.233	2.10861e-06	-
17	2	2L_5689744_SNP	FBgn0266066	CR44819	UPSTREAM	785	A	C	C	0.1026	4	35	1.233	2.10861e-06	-
17	2	2L_5689744_SNP	FBgn0266067	CR44820	DOWNSTREAM	786	A	C	C	0.1026	4	35	1.233	2.10861e-06	-
17	2	2L_5689752_SNP	FBgn0266066	CR44819	UPSTREAM	777	T	A	A	0.1026	4	35	1.233	2.10861e-06	-
17	2	2L_5689752_SNP	FBgn0266067	CR44820	DOWNSTREAM	778	T	A	A	0.1026	4	35	1.233	2.10861e-06	-
17	2	2L_5689768_SNP	FBgn0266066	CR44819	UPSTREAM	761	A	T	T	0.1026	4	35	1.233	2.10861e-06	-
17	2	2L_5689768_SNP	FBgn0266067	CR44820	DOWNSTREAM	762	A	T	T	0.1026	4	35	1.233	2.10861e-06	-
17	2	2L_5689861_SNP	FBgn0266066	CR44819	UPSTREAM	668	A	G	G	0.1026	4	35	1.233	2.10861e-06	-
17	2	2L_5689861_SNP	FBgn0266067	CR44820	DOWNSTREAM	669	A	G	G	0.1026	4	35	1.233	2.10861e-06	-
17	2	2R_17438131_SNP	FBgn0003731	Egfr	INTRON	0	C	T	T	0.1282	5	34	1.085	1.6927e-07	(TF_binding_site|BDTNP1_TFBS_da|FBsf0000325043);(TF_binding_site|BDTNP1_TFBS_dl|FBsf0000303740);(TF_binding_site|BDTNP1_TFBS_Med|FBsf0000281176);(TF_binding_site|BDTNP1_TFBS_twi|FBsf0000200067);(TF_binding_site|mE1_TFBS_HSA|FBsf0000359112);(TF_binding_site|mE1_TFBS_Trl|FBsf0000339044)
17	2	2R_9417510_SNP	FBgn0260964	Vmat	INTRON	0	A	C	C	0.1053	4	34	1.398	1.16697e-08	-
17	2	3L_14058883_SNP	FBgn0052138	CG32138	SYNONYMOUS_CODING	0	T	C	C	0.1316	5	33	1.157	7.16859e-07	(TF_binding_site|mE1_TFBS_cad|FBsf0000244972)
17	2	3L_14058889_SNP	FBgn0052138	CG32138	SYNONYMOUS_CODING	0	A	G	G	0.1282	5	34	1.143	1.02158e-06	(TF_binding_site|mE1_TFBS_cad|FBsf0000244972)
17	2	3L_14059279_SNP	FBgn0052138	CG32138	SYNONYMOUS_CODING	0	T	C	C	0.1053	4	34	1.394	1.35845e-08	(TF_binding_site|mE1_TFBS_cad|FBsf0000244972);(TF_binding_site|mE1_TFBS_HSA|FBsf0000365067);(TF_binding_site|mE1_TFBS_sens|FBsf0000224375)
17	2	3L_14059666_SNP	FBgn0052138	CG32138	SYNONYMOUS_CODING	0	G	T	T	0.1538	6	33	1.131	7.12648e-08	(TF_binding_site|mE1_TFBS_cad|FBsf0000244972)
17	2	3L_14059672_SNP	FBgn0052138	CG32138	SYNONYMOUS_CODING	0	A	C	C	0.1316	5	33	1.324	9.2586e-10	(TF_binding_site|mE1_TFBS_cad|FBsf0000244972)
17	2	3L_14059855_SNP	FBgn0052138	CG32138	SYNONYMOUS_CODING	0	A	G	G	0.1579	6	32	1.122	1.12947e-07	(TF_binding_site|mE1_TFBS_cad|FBsf0000244972)
17	2	3L_14060707_SNP	FBgn0052138	CG32138	INTRON	0	A	C	C	0.1282	5	34	1.143	1.02158e-06	-
17	2	3L_14061891_SNP	FBgn0052138	CG32138	INTRON	0	T	A	A	0.1282	5	34	1.143	1.02158e-06	(TF_binding_site|mE1_TFBS_sens|FBsf0000224376)
17	2	3L_14062035_SNP	FBgn0052138	CG32138	INTRON	0	A	G	G	0.1316	5	33	1.152	8.37791e-07	(TF_binding_site|mE1_TFBS_HSA|FBsf0000365068);(TF_binding_site|mE1_TFBS_sens|FBsf0000224376)
17	2	3L_14062872_SNP	FBgn0052138	CG32138	INTRON	0	G	T	T	0.1389	5	31	1.239	4.85831e-08	-
17	2	3L_14066615_SNP	FBgn0013563	Pex1	SYNONYMOUS_CODING	0	C	T	T	0.1316	5	33	1.152	8.37791e-07	(TF_binding_site|mE1_TFBS_sens|FBsf0000224378)
17	2	3L_14066777_SNP	FBgn0013563	Pex1	SYNONYMOUS_CODING	0	C	T	T	0.1351	5	32	1.253	2.54951e-08	(TF_binding_site|mE1_TFBS_sens|FBsf0000224378)
17	2	3L_14067159_SNP	FBgn0013563	Pex1	NON_SYNONYMOUS_CODING	0	G	A	A	0.1282	5	34	1.143	1.02158e-06	(TF_binding_site|mE1_TFBS_HSA|FBsf0000365071);(TF_binding_site|mE1_TFBS_sens|FBsf0000224378)
17	2	3L_14067254_SNP	FBgn0013563	Pex1	SYNONYMOUS_CODING	0	A	C	C	0.1282	5	34	1.143	1.02158e-06	(TF_binding_site|mE1_TFBS_sens|FBsf0000224378)
17	2	3L_14067920_SNP	FBgn0013563	Pex1	INTRON	0	T	C	C	0.1538	6	33	1.041	1.80526e-06	-
17	2	3L_14067920_SNP	FBgn0005592	btl	UPSTREAM	952	T	C	C	0.1538	6	33	1.041	1.80526e-06	-
17	2	3L_14067941_SNP	FBgn0013563	Pex1	SYNONYMOUS_CODING	0	T	A	A	0.1538	6	33	1.041	1.80526e-06	-
17	2	3L_14067941_SNP	FBgn0005592	btl	UPSTREAM	931	T	A	A	0.1538	6	33	1.041	1.80526e-06	-
17	2	3L_19293435_SNP	FBgn0003089	pip	DOWNSTREAM	66	T	G	G	0.3684	14	24	0.8097	6.82243e-07	-
17	2	3L_19293448_SNP	FBgn0003089	pip	DOWNSTREAM	53	T	A	A	0.3611	13	23	0.8318	7.97411e-07	-
17	2	3L_19293501_SNP	FBgn0003089	pip	INTRON	0	T	C	C	0.3846	15	24	0.7667	2.10715e-06	-
17	2	3L_2140810_SNP	FBgn0052311	zormin	SYNONYMOUS_CODING	0	T	C	C	0.1	4	36	1.139	6.7062e-07	(TF_binding_site|mE1_TFBS_cad|FBsf0000244027);(TF_binding_site|mE1_TFBS_chinmo|FBsf0000209618);(TF_binding_site|mE1_TFBS_HSA|FBsf0000361381);(TF_binding_site|mE1_TFBS_HSA|FBsf0000361382)
17	2	3L_3538851_SNP	FBgn0005640	Eip63E	INTRON	0	T	G	G	0.1316	5	33	1.148	9.47543e-07	-
17	2	3R_24759530_SNP	FBgn0039617	CG14521	INTRON	0	T	C	C	0.1026	4	35	1.232	2.07527e-06	-
17	2	3R_4688650_SNP	FBgn0262614	pyd	INTRON	0	T	C	C	0.1892	7	30	0.979	2.01944e-06	(TF_binding_site|BDTNP1_TFBS_da|FBsf0000328631);(TF_binding_site|BDTNP1_TFBS_dl|FBsf0000310517);(TF_binding_site|BDTNP1_TFBS_sna|FBsf0000270799);(TF_binding_site|mE1_TFBS_bab1|FBsf0000214658);(TF_binding_site|mE1_TFBS_cad|FBsf0000247941);(TF_binding_site|mE1_TFBS_disco|FBsf0000260660);(TF_binding_site|mE1_TFBS_HSA|FBsf0000369728)
17	2	3R_4688650_SNP	FBgn0053551	tRNA:R:85Cb	UPSTREAM	5	T	C	C	0.1892	7	30	0.979	2.01944e-06	(TF_binding_site|BDTNP1_TFBS_da|FBsf0000328631);(TF_binding_site|BDTNP1_TFBS_dl|FBsf0000310517);(TF_binding_site|BDTNP1_TFBS_sna|FBsf0000270799);(TF_binding_site|mE1_TFBS_bab1|FBsf0000214658);(TF_binding_site|mE1_TFBS_cad|FBsf0000247941);(TF_binding_site|mE1_TFBS_disco|FBsf0000260660);(TF_binding_site|mE1_TFBS_HSA|FBsf0000369728)
17	2	3R_4688650_SNP	FBgn0011966	tRNA:R:85Ca	DOWNSTREAM	976	T	C	C	0.1892	7	30	0.979	2.01944e-06	(TF_binding_site|BDTNP1_TFBS_da|FBsf0000328631);(TF_binding_site|BDTNP1_TFBS_dl|FBsf0000310517);(TF_binding_site|BDTNP1_TFBS_sna|FBsf0000270799);(TF_binding_site|mE1_TFBS_bab1|FBsf0000214658);(TF_binding_site|mE1_TFBS_cad|FBsf0000247941);(TF_binding_site|mE1_TFBS_disco|FBsf0000260660);(TF_binding_site|mE1_TFBS_HSA|FBsf0000369728)
17	2	X_18323043_SNP	Intergenic	Intergenic			A	G	G	0.1053	4	34	1.291	4.2394e-07	-
17	2	X_18323054_SNP	Intergenic	Intergenic			A	G	G	0.1053	4	34	1.291	4.2394e-07	-
17	2	X_2727498_SNP	FBgn0028369	kirre	INTRON	0	A	T	T	0.2051	8	31	0.9329	1.67192e-06	-
17	3	3R_7123939_SNP	FBgn0051386	CR31386	INTRON	0	A	T	A	0.3784	14	23	-0.7043	3.68625e-07	-
17	3	3R_7124436_DEL	FBgn0051386	CR31386	INTRON	0	TGTGTGTGTGT	T	TGTGTGTGTGT	0.3429	12	23	-0.7856	4.13162e-08	(TF_binding_site|mE1_TFBS_chinmo|FBsf0000212493);(TF_binding_site|mE1_TFBS_HSA|FBsf0000370549)
17	4	2L_10468619_SNP	FBgn0051719	RluA-1	INTRON	0	C	T	T	0.1282	5	34	-0.9852	3.0317e-07	-
17	4	2L_10659248_SNP	FBgn0267254	CG45690	DOWNSTREAM	689	C	T	T	0.1	4	36	-1.051	7.61659e-07	-
17	4	2L_12636522_SNP	FBgn0032439	Ref2	INTRON	0	T	G	G	0.1053	4	34	-1.058	6.39602e-07	-
17	4	2L_12875135_SNP	Intergenic	Intergenic			T	A	A	0.1081	4	33	-1.063	7.80149e-07	-
17	4	2L_12875141_SNP	Intergenic	Intergenic			C	G	G	0.1081	4	33	-1.063	7.80149e-07	-
17	4	2L_12875175_SNP	Intergenic	Intergenic			G	A	A	0.1081	4	33	-1.07	6.35588e-07	-
17	4	2L_15958960_SNP	FBgn0028645	beat-Ib	INTRON	0	A	T	T	0.1282	5	34	-0.9459	1.33085e-06	-
17	4	2L_15958960_SNP	FBgn0028856	CG18063	SYNONYMOUS_CODING	0	A	T	T	0.1282	5	34	-0.9459	1.33085e-06	-
17	4	2L_20511192_SNP	Intergenic	Intergenic			T	A	A	0.1	4	36	-1.043	9.73529e-07	(TF_binding_site|BDTNP1_TFBS_dl|FBsf0000299618);(TF_binding_site|mE1_TFBS_HSA|FBsf0000352827)
17	4	2L_4904322_SNP	FBgn0031646	CG2837	SYNONYMOUS_CODING	0	G	A	A	0.1	4	36	-1.028	1.84319e-06	(TF_binding_site|mE1_TFBS_cad|FBsf0000241365)
17	4	2L_4904322_SNP	FBgn0031645	CG3036	DOWNSTREAM	433	G	A	A	0.1	4	36	-1.028	1.84319e-06	(TF_binding_site|mE1_TFBS_cad|FBsf0000241365)
17	4	2R_11920505_SNP	FBgn0034070	SP2353	INTRON	0	T	A	A	0.1	4	36	-1.088	2.71473e-07	-
17	4	2R_11920517_SNP	FBgn0034070	SP2353	INTRON	0	T	A	A	0.1212	4	29	-1.118	1.41375e-07	-
17	4	2R_11920711_SNP	FBgn0034070	SP2353	INTRON	0	A	G	G	0.1	4	36	-1.088	2.71473e-07	-
17	4	2R_11920727_INS	FBgn0034070	SP2353	INTRON	0	AGA	A	A	0.1081	4	33	-1.09	3.43257e-07	-
17	4	2R_11920982_DEL	FBgn0034070	SP2353	INTRON	0	T	TACATCAT	TACATCAT	0.1	4	36	-1.088	2.71473e-07	-
17	4	2R_17603133_SNP	FBgn0004362	HmgD	INTRON	0	T	A	A	0.1316	5	33	-0.9828	3.60074e-07	(TF_binding_site|BDTNP1_TFBS_dl|FBsf0000303798);(TF_binding_site|BDTNP1_TFBS_twi|FBsf0000200092);(TF_binding_site|mE1_TFBS_cad|FBsf0000247211);(TF_binding_site|mE1_TFBS_HSA|FBsf0000359183);(TF_binding_site|mE1_TFBS_sens|FBsf0000229288)
17	4	2R_19124674_SNP	Intergenic	Intergenic			A	T	A	0.1	4	36	-1.043	9.73529e-07	(TF_binding_site|BDTNP1_TFBS_dl|FBsf0000304076)
17	4	2R_19124675_SNP	Intergenic	Intergenic			G	C	G	0.1	4	36	-1.043	9.73529e-07	(TF_binding_site|BDTNP1_TFBS_dl|FBsf0000304076)
17	4	2R_19983135_SNP	FBgn0023081	gek	SYNONYMOUS_CODING	0	A	G	G	0.2308	9	30	-0.7473	1.43002e-06	(TF_binding_site|mE1_TFBS_cad|FBsf0000247416);(TF_binding_site|mE1_TFBS_HSA|FBsf0000360070);(TF_binding_site|mE1_TFBS_sens|FBsf0000229767)
17	4	2R_7499568_SNP	FBgn0033636	tou	INTRON	0	T	G	G	0.1026	4	35	-1.038	1.72024e-06	(TF_binding_site|BDTNP1_TFBS_dl|FBsf0000301446)
17	4	2R_9716482_SNP	FBgn0033872	CG6329	INTRON	0	A	T	T	0.1	4	36	-1.088	2.71473e-07	(TF_binding_site|BDTNP1_TFBS_dl|FBsf0000301962);(TF_binding_site|mE1_TFBS_HSA|FBsf0000356474);(TF_binding_site|mE1_TFBS_Trl|FBsf0000338546)
17	4	3R_11955929_SNP	FBgn0003319	Sb	INTRON	0	A	T	T	0.1053	4	34	-1.077	4.53662e-07	-
17	4	3R_15635958_SNP	FBgn0014135	bnl	INTRON	0	A	C	C	0.1026	4	35	-1.054	7.08291e-07	-
17	4	3R_2637447_SNP	FBgn0261503	CR42651	INTRON	0	T	G	G	0.1053	4	34	-1.025	2.1621e-06	(TF_binding_site|BDTNP1_TFBS_dl|FBsf0000309997);(TF_binding_site|BDTNP1_TFBS_hb|FBsf0000292259);(TF_binding_site|BDTNP1_TFBS_Med|FBsf0000284419);(TF_binding_site|BDTNP1_TFBS_twi|FBsf0000264274);(TF_binding_site|mE1_TFBS_cad|FBsf0000247773);(TF_binding_site|mE1_TFBS_Trl|FBsf0000340609)
17	4	X_13872753_SNP	FBgn0267033	mamo	INTRON	0	A	G	G	0.1	4	36	-1.051	7.61659e-07	-
17	4	X_4233302_SNP	FBgn0262738	norpA	INTRON	0	T	A	A	0.1	4	36	-1.028	1.84319e-06	-
17	5	2L_6261270_DEL	FBgn0053531	Ddr	INTRON	0	T	TA	TA	0.2162	8	29	0.7596	1.74133e-06	-
17	5	3L_8055269_SNP	Intergenic	Intergenic			T	G	T	0.4359	17	22	-0.6153	1.6307e-06	-
17	5	3L_8757263_SNP	FBgn0266084	Fhos	INTRON	0	A	G	G	0.25	10	30	0.699	1.1143e-06	-
17	5	3R_12258790_SNP	FBgn0038424	CG17565	UTR_5_PRIME	0	C	G	C	0.4324	16	21	-0.6355	5.42633e-07	(TF_binding_site|mE1_TFBS_cad|FBsf0000248523);(TF_binding_site|mE1_TFBS_eve|FBsf0000251928);(TF_binding_site|mE1_TFBS_HSA|FBsf0000372212)
17	5	3R_12258790_SNP	FBgn0051279	CG31279	DOWNSTREAM	171	C	G	C	0.4324	16	21	-0.6355	5.42633e-07	(TF_binding_site|mE1_TFBS_cad|FBsf0000248523);(TF_binding_site|mE1_TFBS_eve|FBsf0000251928);(TF_binding_site|mE1_TFBS_HSA|FBsf0000372212)
17	6	2L_3839881_SNP	FBgn0004567	slp2	DOWNSTREAM	696	C	T	T	0.15	6	34	-0.7339	1.01335e-06	(regulatory_region|REDfly_CRMs|FBsf0000435439)
17	6	2R_5477950_SNP	FBgn0261016	clos	INTRON	0	T	A	A	0.3077	12	27	-0.565	1.81957e-06	(TF_binding_site|BDTNP1_TFBS_dl|FBsf0000300918);(TF_binding_site|BDTNP1_TFBS_Med|FBsf0000279690);(TF_binding_site|mE1_TFBS_cad|FBsf0000246200)
17	6	2R_5477950_SNP	FBgn0033431	CG1827	DOWNSTREAM	2	T	A	A	0.3077	12	27	-0.565	1.81957e-06	(TF_binding_site|BDTNP1_TFBS_dl|FBsf0000300918);(TF_binding_site|BDTNP1_TFBS_Med|FBsf0000279690);(TF_binding_site|mE1_TFBS_cad|FBsf0000246200)
17	6	2R_5477950_SNP	FBgn0010342	Map60	UPSTREAM	422	T	A	A	0.3077	12	27	-0.565	1.81957e-06	(TF_binding_site|BDTNP1_TFBS_dl|FBsf0000300918);(TF_binding_site|BDTNP1_TFBS_Med|FBsf0000279690);(TF_binding_site|mE1_TFBS_cad|FBsf0000246200)
17	6	3L_11392989_SNP	Intergenic	Intergenic			G	T	G	0.45	18	22	0.5153	2.09482e-06	(TF_binding_site|mE1_TFBS_HSA|FBsf0000364211)
17	6	3R_17083378_SNP	FBgn0038874	ETHR	INTRON	0	A	G	A	0.45	18	22	-0.5495	3.95851e-07	-
17	6	X_21350039_SNP	FBgn0031181	Ir20a	UPSTREAM	67	T	C	C	0.5	20	20	0.521	1.86495e-06	-
17	6	X_21350039_SNP	FBgn0267065	CR45509	DOWNSTREAM	642	T	C	C	0.5	20	20	0.521	1.86495e-06	-
18	1	3R_17970614_SNP	FBgn0051163	SKIP	INTRON	0	C	A	C	0.25	10	30	-1.927	3.49274e-07	(TF_binding_site|mE1_TFBS_cad|FBsf0000248990)
18	2	2L_6414155_SNP	FBgn0031811	CG13982	UTR_3_PRIME	0	A	T	T	0.359	14	25	0.9457	5.60282e-07	(TF_binding_site|BDTNP1_TFBS_da|FBsf0000321654)
18	4	3L_14640084_SNP	FBgn0041604	dlp	INTRON	0	T	C	T	0.1316	5	33	0.971	1.46392e-06	-
18	4	3L_14640102_SNP	FBgn0041604	dlp	INTRON	0	G	T	G	0.1316	5	33	0.971	1.46392e-06	-
18	4	3L_4081823_SNP	FBgn0004516	Gad1	INTRON	0	T	C	T	0.4324	16	21	-0.6588	1.55292e-06	-
18	4	3L_9021859_SNP	Intergenic	Intergenic			G	T	T	0.2105	8	30	0.801	1.57588e-06	(TF_binding_site|BDTNP1_TFBS_bcd|FBsf0000333857);(TF_binding_site|BDTNP1_TFBS_da|FBsf0000326463);(TF_binding_site|BDTNP1_TFBS_dl|FBsf0000306398);(TF_binding_site|BDTNP1_TFBS_gt|FBsf0000293881);(TF_binding_site|BDTNP1_TFBS_kni|FBsf0000289760);(TF_binding_site|BDTNP1_TFBS_Med|FBsf0000282568);(TF_binding_site|BDTNP1_TFBS_shn|FBsf0000273913);(TF_binding_site|BDTNP1_TFBS_sna|FBsf0000269248);(TF_bindin…
18	4	3L_9021868_SNP	Intergenic	Intergenic			A	G	G	0.2051	8	31	0.7952	1.79409e-06	(TF_binding_site|BDTNP1_TFBS_bcd|FBsf0000333857);(TF_binding_site|BDTNP1_TFBS_da|FBsf0000326463);(TF_binding_site|BDTNP1_TFBS_dl|FBsf0000306398);(TF_binding_site|BDTNP1_TFBS_gt|FBsf0000293881);(TF_binding_site|BDTNP1_TFBS_kni|FBsf0000289760);(TF_binding_site|BDTNP1_TFBS_Med|FBsf0000282568);(TF_binding_site|BDTNP1_TFBS_shn|FBsf0000273913);(TF_binding_site|BDTNP1_TFBS_sna|FBsf0000269248);(TF_bindin…
18	4	3R_17482034_DEL	FBgn0011766	E2f	INTRON	0	T	TT	TT	0.2353	8	26	0.8178	1.34176e-06	-
18	4	3R_21392296_SNP	FBgn0011666	msi	INTRON	0	A	T	T	0.1053	4	34	1.083	9.04478e-07	-
18	4	3R_3868427_SNP	FBgn0262362	CG43060	DOWNSTREAM	930	A	T	T	0.3438	11	21	0.7513	1.43835e-06	-
18	4	3R_4773965_SNP	Intergenic	Intergenic			T	C	C	0.1579	6	32	0.8899	2.15041e-06	-
18	5	2L_974501_SNP	Intergenic	Intergenic			C	T	T	0.3947	15	23	-0.6353	2.975e-07	(TF_binding_site|BDTNP1_TFBS_dl|FBsf0000295937);(TF_binding_site|BDTNP1_TFBS_slp1|FBsf0000271588);(TF_binding_site|mE1_TFBS_HSA|FBsf0000344235);(TF_binding_site|mE1_TFBS_Trl|FBsf0000337004)
18	5	2R_6125378_SNP	FBgn0266803	CR45265	EXON	0	G	A	A	0.3	12	28	0.6357	1.18812e-06	(TF_binding_site|BDTNP1_TFBS_dl|FBsf0000301081);(TF_binding_site|mE1_TFBS_D|FBsf0000240484);(TF_binding_site|mE1_TFBS_Trl|FBsf0000338265)
18	5	2R_6125378_SNP	FBgn0005619	Hdc	UPSTREAM	115	G	A	A	0.3	12	28	0.6357	1.18812e-06	(TF_binding_site|BDTNP1_TFBS_dl|FBsf0000301081);(TF_binding_site|mE1_TFBS_D|FBsf0000240484);(TF_binding_site|mE1_TFBS_Trl|FBsf0000338265)
18	5	2R_6125378_SNP	FBgn0000448	Hr46	UPSTREAM	525	G	A	A	0.3	12	28	0.6357	1.18812e-06	(TF_binding_site|BDTNP1_TFBS_dl|FBsf0000301081);(TF_binding_site|mE1_TFBS_D|FBsf0000240484);(TF_binding_site|mE1_TFBS_Trl|FBsf0000338265)
18	5	3L_15493031_SNP	FBgn0036500	CG7275	INTRON	0	T	C	C	0.3421	13	25	-0.6111	1.22501e-06	(TF_binding_site|mE1_TFBS_sens|FBsf0000224607)
18	6	2L_14536629_SNP	Intergenic	Intergenic			C	T	T	0.3684	14	24	-0.5587	1.09977e-06	(TF_binding_site|mE1_TFBS_HSA|FBsf0000351161);(TF_binding_site|mE1_TFBS_sens|FBsf0000217706);(TF_binding_site|mE1_TFBS_Ubx|FBsf0000261910)
18	6	2L_17289412_SNP	Intergenic	Intergenic			C	T	T	0.2564	10	29	-0.6152	1.54913e-06	-
18	6	2L_7580202_SNP	Intergenic	Intergenic			T	C	T	0.4211	16	22	0.5293	1.0814e-06	-
18	6	2L_7580542_SNP	Intergenic	Intergenic			A	G	A	0.359	14	25	0.5364	1.18021e-06	-
18	6	3R_24819336_SNP	FBgn0039620	wat	SYNONYMOUS_CODING	0	A	G	A	0.3	12	28	-0.5691	1.91548e-06	(TF_binding_site|BDTNP1_TFBS_twi|FBsf0000266279);(TF_binding_site|mE1_TFBS_HSA|FBsf0000376163)
19	2	2L_17767587_SNP	FBgn0015609	CadN	INTRON	0	A	C	A	0.4865	18	19	-0.8275	5.63912e-07	-
20	1	3R_11484550_INS	Intergenic	Intergenic			CCCG	A	A	0.2564	10	29	1.283	2.00232e-06	(TF_binding_site|BDTNP1_TFBS_twi|FBsf0000265105)
20	2	3L_16160574_SNP	Intergenic	Intergenic			T	G	G	0.1282	5	34	-1.057	4.65653e-07	-
20	2	3L_16168698_SNP	Intergenic	Intergenic			A	G	G	0.1316	5	33	-1.036	1.0416e-06	-
20	4	2L_16377869_SNP	Intergenic	Intergenic			G	T	T	0.3684	14	24	0.4751	1.55483e-06	-
20	4	3L_16773218_SNP	FBgn0036661	CG9705	START_GAINED	0	T	C	C	0.3421	13	25	-0.4773	1.31526e-06	(TF_binding_site|BDTNP1_TFBS_dl|FBsf0000308062);(TF_binding_site|BDTNP1_TFBS_hb|FBsf0000291506);(TF_binding_site|BDTNP1_TFBS_Med|FBsf0000283440);(TF_binding_site|mE1_TFBS_h|FBsf0000257133);(TF_binding_site|mE1_TFBS_hkb|FBsf0000255554);(TF_binding_site|mE1_TFBS_HSA|FBsf0000366005);(TF_binding_site|mE1_TFBS_Trl|FBsf0000340135)
20	4	3L_16773218_SNP	FBgn0036660	CG13025	UPSTREAM	382	T	C	C	0.3421	13	25	-0.4773	1.31526e-06	(TF_binding_site|BDTNP1_TFBS_dl|FBsf0000308062);(TF_binding_site|BDTNP1_TFBS_hb|FBsf0000291506);(TF_binding_site|BDTNP1_TFBS_Med|FBsf0000283440);(TF_binding_site|mE1_TFBS_h|FBsf0000257133);(TF_binding_site|mE1_TFBS_hkb|FBsf0000255554);(TF_binding_site|mE1_TFBS_HSA|FBsf0000366005);(TF_binding_site|mE1_TFBS_Trl|FBsf0000340135)
20	4	3L_22874098_SNP	FBgn0037202	Ssl1	DOWNSTREAM	35	C	T	T	0.4211	16	22	-0.4656	8.38242e-07	(TF_binding_site|mE1_TFBS_cad|FBsf0000245685)
20	4	3L_22874098_SNP	FBgn0037203	slif	UPSTREAM	47	C	T	T	0.4211	16	22	-0.4656	8.38242e-07	(TF_binding_site|mE1_TFBS_cad|FBsf0000245685)
20	4	3R_23439944_SNP	FBgn0039530	Tusp	INTRON	0	A	T	T	0.25	10	30	-0.5078	1.98906e-06	-
21	1	2L_11243544_DEL	FBgn0264442	ab	INTRON	0	C	CAC	CAC	0.1026	4	35	-3.073	1.0702e-06	(TF_binding_site|BDTNP1_TFBS_dl|FBsf0000298096);(TF_binding_site|BDTNP1_TFBS_twi|FBsf0000201470);(TF_binding_site|mE1_TFBS_HSA|FBsf0000347656)
21	1	2L_11244351_SNP	FBgn0264442	ab	INTRON	0	T	C	C	0.1026	4	35	-3.053	1.34291e-06	(TF_binding_site|BDTNP1_TFBS_twi|FBsf0000201470);(TF_binding_site|mE1_TFBS_HSA|FBsf0000347656)
21	1	2L_11579194_SNP	Intergenic	Intergenic			G	T	T	0.1	4	36	-3.122	5.8313e-07	-
21	1	2L_11579253_SNP	Intergenic	Intergenic			G	A	A	0.1	4	36	-3.122	5.8313e-07	-
21	1	2L_11579589_SNP	Intergenic	Intergenic			A	G	G	0.1	4	36	-3.122	5.8313e-07	-
21	1	2L_11579602_SNP	Intergenic	Intergenic			C	A	A	0.1	4	36	-3.122	5.8313e-07	-
21	1	2L_11579688_SNP	Intergenic	Intergenic			T	A	A	0.1	4	36	-3.122	5.8313e-07	-
21	1	2L_11579694_SNP	Intergenic	Intergenic			A	C	C	0.1053	4	34	-3.191	2.83115e-07	-
21	1	2L_11580168_SNP	Intergenic	Intergenic			G	C	C	0.1	4	36	-3.122	5.8313e-07	-
21	1	2L_12171683_SNP	FBgn0032420	CG6583	UTR_3_PRIME	0	G	A	A	0.1026	4	35	-3.138	5.07544e-07	-
21	1	2L_12171683_SNP	FBgn0032419	CG17217	DOWNSTREAM	451	G	A	A	0.1026	4	35	-3.138	5.07544e-07	-
21	1	2L_17601160_SNP	FBgn0261089	Sytalpha	INTRON	0	G	A	A	0.1026	4	35	-3.043	1.50575e-06	-
21	1	2L_17601275_SNP	FBgn0261089	Sytalpha	INTRON	0	C	T	T	0.125	5	35	-2.797	9.05163e-07	-
21	1	2L_17603640_SNP	FBgn0261089	Sytalpha	UTR_3_PRIME	0	A	C	C	0.1316	5	33	-2.8	9.94342e-07	(TF_binding_site|mE1_TFBS_bab1|FBsf0000214108)
21	1	2L_17603642_SNP	FBgn0261089	Sytalpha	DOWNSTREAM	2	T	C	C	0.1351	5	32	-2.834	7.03925e-07	(TF_binding_site|mE1_TFBS_bab1|FBsf0000214108)
21	1	2L_21100369_SNP	FBgn0032915	CG12050	SYNONYMOUS_CODING	0	C	T	T	0.1	4	36	-3.123	5.76053e-07	-
21	1	2L_6777599_SNP	FBgn0031858	CG17378	INTRON	0	C	A	A	0.1	4	36	-3.02	1.8229e-06	(TF_binding_site|mE1_TFBS_cad|FBsf0000241562)
21	1	2L_6777599_SNP	FBgn0015776	nrv1	DOWNSTREAM	956	C	A	A	0.1	4	36	-3.02	1.8229e-06	(TF_binding_site|mE1_TFBS_cad|FBsf0000241562)
21	1	2L_6778523_SNP	FBgn0015776	nrv1	DOWNSTREAM	32	A	G	G	0.125	4	28	-3.188	4.47324e-07	-
21	1	2L_6778523_SNP	FBgn0031858	CG17378	DOWNSTREAM	79	A	G	G	0.125	4	28	-3.188	4.47324e-07	-
21	1	2L_6778624_SNP	FBgn0031858	CG17378	DOWNSTREAM	180	G	T	T	0.1515	5	28	-2.774	2.01885e-06	-
21	1	2L_6778624_SNP	FBgn0015776	nrv1	DOWNSTREAM	200	G	T	T	0.1515	5	28	-2.774	2.01885e-06	-
21	1	2L_6778686_SNP	FBgn0015776	nrv1	DOWNSTREAM	138	T	A	A	0.1389	5	31	-2.765	1.74759e-06	-
21	1	2L_6778686_SNP	FBgn0031858	CG17378	DOWNSTREAM	242	T	A	A	0.1389	5	31	-2.765	1.74759e-06	-
21	1	2L_6813634_SNP	FBgn0264890	CR44081	DOWNSTREAM	524	T	C	C	0.1053	4	34	-3.033	1.40544e-06	-
21	1	2L_6813833_SNP	FBgn0264890	CR44081	DOWNSTREAM	723	A	G	G	0.1	4	36	-3.029	1.38073e-06	(TF_binding_site|mE1_TFBS_HSA|FBsf0000346200);(TF_binding_site|mE1_TFBS_sens|FBsf0000216500)
21	1	2R_10539539_DEL	Intergenic	Intergenic			A	ACACATATA	ACACATATA	0.1316	5	33	-2.783	1.26783e-06	-
21	1	2R_10542170_SNP	Intergenic	Intergenic			A	T	T	0.1026	4	35	-3.283	8.00245e-08	-
21	1	2R_14573494_SNP	FBgn0265625	CG44433	SYNONYMOUS_CODING	0	G	T	T	0.1	4	36	-3.044	1.4077e-06	(TF_binding_site|mE1_TFBS_chinmo|FBsf0000211549)
21	1	2R_17114077_SNP	FBgn0034606	ASPP	INTRON	0	A	G	A	0.1026	4	35	-3.18	3.0314e-07	-
21	1	2R_9097944_SNP	FBgn0085264	CG34235	INTRON	0	A	G	G	0.1026	4	35	-3.107	7.2774e-07	-
21	1	2R_9097944_SNP	FBgn0050058	CG30058	INTRON	0	A	G	G	0.1026	4	35	-3.107	7.2774e-07	-
21	1	2R_9097944_SNP	FBgn0085341	CG34312	INTRON	0	A	G	G	0.1026	4	35	-3.107	7.2774e-07	-
21	1	2R_9097944_SNP	FBgn0033806	FLASH	DOWNSTREAM	621	A	G	G	0.1026	4	35	-3.107	7.2774e-07	-
21	1	3L_13789987_SNP	FBgn0264001	bru-3	INTRON	0	C	T	T	0.1081	4	33	-3.063	1.33412e-06	-
21	1	3L_14561340_SNP	FBgn0261816	CG42758	DOWNSTREAM	107	T	C	C	0.1081	4	33	-3.114	7.54053e-07	-
21	1	3L_15732669_SNP	Intergenic	Intergenic			A	C	C	0.1	4	36	-3.02	1.8229e-06	-
21	1	3L_3501019_SNP	FBgn0259224	CG42324	INTRON	0	A	G	G	0.1026	4	35	-3.209	2.11355e-07	-
21	1	3L_3501032_SNP	FBgn0259224	CG42324	INTRON	0	G	T	T	0.125	5	35	-2.779	1.14105e-06	-
21	1	3L_6963006_SNP	FBgn0035726	CG9953	SYNONYMOUS_CODING	0	C	T	C	0.1026	4	35	-3.027	1.77835e-06	(TF_binding_site|mE1_TFBS_ttk|FBsf0000335455)
21	1	3L_6963006_SNP	FBgn0035725	Mis12	UPSTREAM	858	C	T	C	0.1026	4	35	-3.027	1.77835e-06	(TF_binding_site|mE1_TFBS_ttk|FBsf0000335455)
21	1	3L_7701993_SNP	FBgn0052373	CG32373	INTRON	0	A	G	G	0.1	4	36	-3.122	5.8313e-07	-
21	1	3L_7701993_SNP	FBgn0261788	Ank2	DOWNSTREAM	27	A	G	G	0.1	4	36	-3.122	5.8313e-07	-
21	1	3R_21655421_SNP	FBgn0011670	Mst57Dc	UPSTREAM	1	A	G	G	0.125	5	35	-2.784	8.47736e-07	-
21	1	3R_21655421_SNP	FBgn0261061	Sfp96F	DOWNSTREAM	362	A	G	G	0.125	5	35	-2.784	8.47736e-07	-
21	1	3R_23102462_SNP	FBgn0046247	CG5938	UTR_3_PRIME	0	T	G	G	0.1053	4	34	-3.169	2.87478e-07	(TF_binding_site|BDTNP1_TFBS_bcd|FBsf0000334352);(TF_binding_site|BDTNP1_TFBS_dl|FBsf0000314288);(TF_binding_site|BDTNP1_TFBS_twi|FBsf0000266183);(TF_binding_site|mE1_TFBS_HSA|FBsf0000375684)
21	1	3R_23102462_SNP	FBgn0039507	mrt	DOWNSTREAM	509	T	G	G	0.1053	4	34	-3.169	2.87478e-07	(TF_binding_site|BDTNP1_TFBS_bcd|FBsf0000334352);(TF_binding_site|BDTNP1_TFBS_dl|FBsf0000314288);(TF_binding_site|BDTNP1_TFBS_twi|FBsf0000266183);(TF_binding_site|mE1_TFBS_HSA|FBsf0000375684)
21	1	X_1628933_SNP	Intergenic	Intergenic			T	A	A	0.1	4	36	-3.052	1.2941e-06	-
21	1	X_5500955_SNP	FBgn0263511	Vsx1	INTRON	0	C	A	A	0.1	4	36	-3.178	2.92404e-07	(TF_binding_site|mE1_TFBS_cad|FBsf0000242875);(TF_binding_site|mE1_TFBS_chinmo|FBsf0000208349)
21	1	X_6594184_SNP	FBgn0029895	CG14441	UTR_5_PRIME	0	G	A	A	0.1026	4	35	-3.073	1.07173e-06	(TF_binding_site|BDTNP1_TFBS_da|FBsf0000331872);(TF_binding_site|BDTNP1_TFBS_dl|FBsf0000317102);(TF_binding_site|BDTNP1_TFBS_Med|FBsf0000287924);(TF_binding_site|BDTNP1_TFBS_twi|FBsf0000205272);(TF_binding_site|mE1_TFBS_cad|FBsf0000242946);(TF_binding_site|mE1_TFBS_HSA|FBsf0000379948)
21	2	2L_15473456_SNP	Intergenic	Intergenic			A	T	T	0.15	6	34	-1.465	5.1538e-07	-
21	2	2L_15473491_SNP	Intergenic	Intergenic			G	A	A	0.1282	5	34	-1.67	4.46698e-08	-
21	2	2L_15473589_SNP	Intergenic	Intergenic			C	T	T	0.1053	4	34	-1.798	1.34713e-07	-
21	2	2L_16473724_SNP	FBgn0005677	dac	INTRON	0	T	G	T	0.4595	17	20	-1.056	1.36114e-06	-
21	2	2R_14325961_SNP	FBgn0050118	CG30118	INTRON	0	C	A	A	0.15	6	34	-1.465	5.1538e-07	(TF_binding_site|BDTNP1_TFBS_dl|FBsf0000303052);(TF_binding_site|BDTNP1_TFBS_hb|FBsf0000290277);(TF_binding_site|BDTNP1_TFBS_Med|FBsf0000280824);(TF_binding_site|BDTNP1_TFBS_twi|FBsf0000199753);(TF_binding_site|mE1_TFBS_HSA|FBsf0000358103)
21	2	2R_15385872_SNP	FBgn0034454	CG15120	INTRON	0	A	G	G	0.3158	12	26	-1.105	1.91054e-06	(TF_binding_site|mE1_TFBS_cad|FBsf0000247027)
21	2	3L_13762696_SNP	FBgn0264001	bru-3	INTRON	0	G	T	G	0.2162	8	29	-1.281	1.25739e-06	-
21	2	3L_13762749_SNP	FBgn0264001	bru-3	INTRON	0	T	A	A	0.1	4	36	-1.656	1.01852e-06	-
21	2	3L_1755455_SNP	FBgn0022702	Cht2	INTRON	0	G	A	A	0.3077	12	27	-1.135	1.71089e-07	(TF_binding_site|mE1_TFBS_cad|FBsf0000243998);(TF_binding_site|mE1_TFBS_HSA|FBsf0000361243);(TF_binding_site|mE1_TFBS_Trl|FBsf0000339371)
21	2	3L_1755455_SNP	FBgn0035268	CG8001	UPSTREAM	704	G	A	A	0.3077	12	27	-1.135	1.71089e-07	(TF_binding_site|mE1_TFBS_cad|FBsf0000243998);(TF_binding_site|mE1_TFBS_HSA|FBsf0000361243);(TF_binding_site|mE1_TFBS_Trl|FBsf0000339371)
21	2	3L_20969676_SNP	Intergenic	Intergenic			C	T	T	0.1538	6	33	-1.406	1.89355e-06	-
21	2	3L_2172778_DEL	FBgn0035311	CR15821	UPSTREAM	6	T	TTTAGTTTATGCA	TTTAGTTTATGCA	0.1026	4	35	-1.721	7.02633e-07	-
21	2	3L_2172778_DEL	FBgn0035312	CG15820	DOWNSTREAM	216	T	TTTAGTTTATGCA	TTTAGTTTATGCA	0.1026	4	35	-1.721	7.02633e-07	-
21	2	3L_2172794_DEL	FBgn0035311	CR15821	UPSTREAM	22	A	AACGGCGTTT	AACGGCGTTT	0.1026	4	35	-1.721	7.02633e-07	-
21	2	3L_2172794_DEL	FBgn0035312	CG15820	DOWNSTREAM	200	A	AACGGCGTTT	AACGGCGTTT	0.1026	4	35	-1.721	7.02633e-07	-
21	2	3L_6315728_SNP	FBgn0041625	Or65a	DOWNSTREAM	530	C	T	T	0.1	4	36	-1.753	3.8668e-07	-
21	2	3R_22990644_SNP	FBgn0051065	ppk31	INTRON	0	G	A	G	0.2368	9	29	-1.27	3.23556e-07	(regulatory_region|REDfly_CRMs|FBsf0000436151);(TF_binding_site|BDTNP1_TFBS_Med|FBsf0000286679)
21	2	3R_22990644_SNP	FBgn0085322	CG34293	DOWNSTREAM	147	G	A	G	0.2368	9	29	-1.27	3.23556e-07	(regulatory_region|REDfly_CRMs|FBsf0000436151);(TF_binding_site|BDTNP1_TFBS_Med|FBsf0000286679)
21	2	3R_22990644_SNP	FBgn0003482	spn-D	UPSTREAM	794	G	A	G	0.2368	9	29	-1.27	3.23556e-07	(regulatory_region|REDfly_CRMs|FBsf0000436151);(TF_binding_site|BDTNP1_TFBS_Med|FBsf0000286679)
21	2	3R_22991508_SNP	FBgn0003482	spn-D	UTR_5_PRIME	0	G	A	A	0.225	9	31	-1.213	1.29422e-06	(regulatory_region|REDfly_CRMs|FBsf0000436151);(TF_binding_site|BDTNP1_TFBS_Med|FBsf0000286679);(TF_binding_site|mE1_TFBS_HSA|FBsf0000375637)
21	2	3R_22991508_SNP	FBgn0085322	CG34293	UPSTREAM	211	G	A	A	0.225	9	31	-1.213	1.29422e-06	(regulatory_region|REDfly_CRMs|FBsf0000436151);(TF_binding_site|BDTNP1_TFBS_Med|FBsf0000286679);(TF_binding_site|mE1_TFBS_HSA|FBsf0000375637)
21	2	3R_22991508_SNP	FBgn0051065	ppk31	DOWNSTREAM	655	G	A	A	0.225	9	31	-1.213	1.29422e-06	(regulatory_region|REDfly_CRMs|FBsf0000436151);(TF_binding_site|BDTNP1_TFBS_Med|FBsf0000286679);(TF_binding_site|mE1_TFBS_HSA|FBsf0000375637)
21	2	3R_22992743_SNP	FBgn0003482	spn-D	UTR_3_PRIME	0	A	T	T	0.1538	6	33	-1.414	1.59862e-06	(regulatory_region|REDfly_CRMs|FBsf0000436151)
21	2	3R_22992880_SNP	FBgn0003482	spn-D	DOWNSTREAM	36	C	G	G	0.1538	6	33	-1.414	1.59862e-06	(regulatory_region|REDfly_CRMs|FBsf0000436151)
21	2	3R_22992883_SNP	FBgn0003482	spn-D	DOWNSTREAM	39	G	A	A	0.1795	7	32	-1.398	3.01016e-07	(regulatory_region|REDfly_CRMs|FBsf0000436151)
21	2	3R_25416194_DEL	FBgn0051041	CG31041	INTRON	0	A	ATCATAGA	ATCATAGA	0.1538	6	33	-1.464	5.80004e-07	(TF_binding_site|mE1_TFBS_cad|FBsf0000249516);(TF_binding_site|mE1_TFBS_HSA|FBsf0000376386);(TF_binding_site|mE1_TFBS_sens|FBsf0000234087)
21	2	3R_25416194_DEL	FBgn0039671	CG11470	UPSTREAM	711	A	ATCATAGA	ATCATAGA	0.1538	6	33	-1.464	5.80004e-07	(TF_binding_site|mE1_TFBS_cad|FBsf0000249516);(TF_binding_site|mE1_TFBS_HSA|FBsf0000376386);(TF_binding_site|mE1_TFBS_sens|FBsf0000234087)
21	2	X_6425634_SNP	FBgn0014026	RpL7A	INTRON	0	G	C	C	0.1053	4	34	-1.757	3.87491e-07	(TF_binding_site|BDTNP1_TFBS_sna|FBsf0000269989);(TF_binding_site|mE1_TFBS_HSA|FBsf0000379870);(TF_binding_site|mE1_TFBS_inv|FBsf0000235297)
21	2	X_6425634_SNP	FBgn0065071	snoRNA:Or-CD10	DOWNSTREAM	34	G	C	C	0.1053	4	34	-1.757	3.87491e-07	(TF_binding_site|BDTNP1_TFBS_sna|FBsf0000269989);(TF_binding_site|mE1_TFBS_HSA|FBsf0000379870);(TF_binding_site|mE1_TFBS_inv|FBsf0000235297)
21	2	X_6425634_SNP	FBgn0014031	Spat	DOWNSTREAM	875	G	C	C	0.1053	4	34	-1.757	3.87491e-07	(TF_binding_site|BDTNP1_TFBS_sna|FBsf0000269989);(TF_binding_site|mE1_TFBS_HSA|FBsf0000379870);(TF_binding_site|mE1_TFBS_inv|FBsf0000235297)
21	2	X_6854457_SNP	FBgn0029922	CG14431	INTRON	0	G	A	A	0.1795	7	32	-1.448	3.81898e-08	-
21	2	X_6854457_SNP	FBgn0052732	CG32732	INTRON	0	G	A	A	0.1795	7	32	-1.448	3.81898e-08	-
21	2	X_6854562_SNP	FBgn0052732	CG32732	INTRON	0	C	T	T	0.1579	6	32	-1.475	2.93992e-07	-
21	2	X_6854562_SNP	FBgn0029922	CG14431	INTRON	0	C	T	T	0.1579	6	32	-1.475	2.93992e-07	-
21	2	X_6854745_SNP	FBgn0052732	CG32732	INTRON	0	C	A	C	0.2632	10	28	-1.167	2.01462e-06	-
21	2	X_6854745_SNP	FBgn0029922	CG14431	INTRON	0	C	A	C	0.2632	10	28	-1.167	2.01462e-06	-
21	3	2L_17193793_DEL	FBgn0032629	beat-IIIc	INTRON	0	AA	A	AA	0.2368	9	29	-1.034	8.27811e-07	-
21	3	2L_17307063_SNP	Intergenic	Intergenic			A	G	G	0.2564	10	29	-0.9699	1.88361e-06	-
21	3	2L_2288680_SNP	FBgn0031410	CG17237	NON_SYNONYMOUS_CODING	0	A	T	T	0.1053	4	34	-1.482	7.04231e-08	-
21	3	2L_2288680_SNP	FBgn0261523	CG42658	UPSTREAM	747	A	T	T	0.1053	4	34	-1.482	7.04231e-08	-
21	3	2L_3668872_SNP	FBgn0259953	CG42463	SYNONYMOUS_CODING	0	A	T	T	0.275	11	29	-0.9342	2.04027e-06	-
21	3	2L_3668872_SNP	FBgn0085369	CG34340	INTRON	0	A	T	T	0.275	11	29	-0.9342	2.04027e-06	-
21	3	2L_3668872_SNP	FBgn0259951	Sfp24Ba	UPSTREAM	321	A	T	T	0.275	11	29	-0.9342	2.04027e-06	-
21	3	2L_3668872_SNP	FBgn0259952	Sfp24Bb	DOWNSTREAM	389	A	T	T	0.275	11	29	-0.9342	2.04027e-06	-
21	3	2L_7707398_SNP	FBgn0041181	Tep3	SYNONYMOUS_CODING	0	G	A	A	0.3421	13	25	-0.8712	1.20661e-06	-
21	3	2L_7707398_SNP	FBgn0266325	CR44990	DOWNSTREAM	702	G	A	A	0.3421	13	25	-0.8712	1.20661e-06	-
21	3	2R_2748277_SNP	Intergenic	Intergenic			C	T	T	0.1795	7	32	-1.155	3.68529e-07	-
21	3	2R_2748278_SNP	Intergenic	Intergenic			T	A	A	0.2	8	32	-1.049	1.69316e-06	-
21	3	2R_6314338_SNP	FBgn0033521	CG12896	DOWNSTREAM	47	T	G	G	0.1389	5	31	-1.256	1.77897e-06	-
21	3	2R_8772994_SNP	FBgn0003975	vg	INTRON	0	A	T	A	0.35	14	26	-0.877	1.87108e-06	(TF_binding_site|BDTNP1_TFBS_dl|FBsf0000301727);(TF_binding_site|BDTNP1_TFBS_Med|FBsf0000280119);(TF_binding_site|mE1_TFBS_Trl|FBsf0000338472)
21	3	2R_8773266_SNP	FBgn0003975	vg	INTRON	0	G	A	G	0.35	14	26	-0.877	1.87108e-06	(TF_binding_site|BDTNP1_TFBS_dl|FBsf0000301727)
21	3	2R_8773319_SNP	FBgn0003975	vg	INTRON	0	C	A	C	0.3158	12	26	-0.9313	1.40375e-06	(TF_binding_site|BDTNP1_TFBS_dl|FBsf0000301727)
21	3	2R_8773350_SNP	FBgn0003975	vg	INTRON	0	A	G	A	0.3846	15	24	-0.873	1.71942e-06	(TF_binding_site|BDTNP1_TFBS_dl|FBsf0000301727)
21	3	2R_8773393_SNP	FBgn0003975	vg	INTRON	0	G	C	G	0.359	14	25	-0.8896	1.46541e-06	(TF_binding_site|BDTNP1_TFBS_dl|FBsf0000301727)
21	3	2R_8773412_SNP	FBgn0003975	vg	INTRON	0	T	G	T	0.3947	15	23	-0.8982	8.61659e-07	(TF_binding_site|BDTNP1_TFBS_dl|FBsf0000301727)
21	3	2R_8773549_SNP	FBgn0003975	vg	INTRON	0	T	G	T	0.35	14	26	-0.877	1.87108e-06	(TF_binding_site|BDTNP1_TFBS_dl|FBsf0000301727)
21	3	2R_8773660_SNP	FBgn0003975	vg	INTRON	0	A	T	A	0.35	14	26	-0.877	1.87108e-06	(TF_binding_site|BDTNP1_TFBS_dl|FBsf0000301727)
21	3	3L_16545431_SNP	Intergenic	Intergenic			C	G	G	0.2703	10	27	-1.015	5.43141e-07	-
21	3	3L_18727530_SNP	Intergenic	Intergenic			A	T	T	0.1944	7	29	-1.109	2.12686e-06	-
21	3	3L_19178236_SNP	FBgn0016797	fz2	INTRON	0	T	C	C	0.3514	13	24	-0.9087	2.02829e-06	(TF_binding_site|BDTNP1_TFBS_da|FBsf0000327627);(TF_binding_site|BDTNP1_TFBS_dl|FBsf0000308563);(TF_binding_site|BDTNP1_TFBS_gt|FBsf0000294097);(TF_binding_site|BDTNP1_TFBS_slp1|FBsf0000272704);(TF_binding_site|BDTNP1_TFBS_twi|FBsf0000204268);(TF_binding_site|mE1_TFBS_cad|FBsf0000245379);(TF_binding_site|mE1_TFBS_HSA|FBsf0000366782)
21	3	3R_9312443_SNP	Intergenic	Intergenic			C	A	C	0.3514	13	24	-0.9004	7.10652e-07	-
21	3	3R_9312448_SNP	Intergenic	Intergenic			A	C	A	0.3684	14	24	-0.8879	5.46933e-07	-
21	3	X_10134611_SNP	FBgn0263220	Hk	INTRON	0	T	C	C	0.2051	8	31	-1.032	1.05983e-06	-
21	3	X_10134618_SNP	FBgn0263220	Hk	INTRON	0	T	C	C	0.1795	7	32	-1.065	1.90976e-06	-
21	3	X_13969143_SNP	Intergenic	Intergenic			A	G	G	0.275	11	29	-0.9291	4.864e-07	-
21	3	X_3738572_SNP	FBgn0000542	ec	INTRON	0	A	G	G	0.2632	10	28	-0.9762	1.77129e-06	(TF_binding_site|BDTNP1_TFBS_dl|FBsf0000316422);(TF_binding_site|BDTNP1_TFBS_Med|FBsf0000287666);(TF_binding_site|BDTNP1_TFBS_sna|FBsf0000269888);(TF_binding_site|BDTNP1_TFBS_twi|FBsf0000205021);(TF_binding_site|mE1_TFBS_Trl|FBsf0000342341)
21	4	2R_13936840_SNP	FBgn0034293	CG14495	SYNONYMOUS_CODING	0	G	A	A	0.35	14	26	-0.7631	2.1589e-07	-
21	4	2R_13936840_SNP	FBgn0054005	CG34005	DOWNSTREAM	426	G	A	A	0.35	14	26	-0.7631	2.1589e-07	-
21	4	2R_13936840_SNP	FBgn0034294	Muc55B	DOWNSTREAM	684	G	A	A	0.35	14	26	-0.7631	2.1589e-07	-
21	4	2R_20425358_SNP	FBgn0035021	CG4622	INTRON	0	C	T	T	0.1282	5	34	-1.042	1.71535e-06	-
21	4	2R_20425358_SNP	FBgn0035023	ITP	INTRON	0	C	T	T	0.1282	5	34	-1.042	1.71535e-06	-
21	6	3L_2986446_SNP	Intergenic	Intergenic			C	A	A	0.1579	6	32	-0.8954	4.62532e-07	-
21	6	3L_673701_SNP	Intergenic	Intergenic			G	A	A	0.3429	12	23	-0.7064	1.30481e-06	(TF_binding_site|mE1_TFBS_HSA|FBsf0000360821);(TF_binding_site|mE1_TFBS_Trl|FBsf0000339304);(TF_binding_site|mE1_TFBS_ttk|FBsf0000335439)
21	6	3L_673709_SNP	Intergenic	Intergenic			A	G	G	0.3	12	28	-0.7184	2.15423e-07	(TF_binding_site|mE1_TFBS_HSA|FBsf0000360821);(TF_binding_site|mE1_TFBS_Trl|FBsf0000339304);(TF_binding_site|mE1_TFBS_ttk|FBsf0000335439)
21	6	3R_4920291_SNP	FBgn0003165	pum	INTRON	0	A	G	G	0.3684	14	24	-0.6945	3.01282e-07	-
21	7	3R_14351029_SNP	FBgn0004652	fru	INTRON	0	T	A	A	0.3889	14	22	0.5817	6.6317e-07	(TF_binding_site|mE1_TFBS_HSA|FBsf0000372914);(TF_binding_site|mE1_TFBS_inv|FBsf0000237345)
21	7	3R_17621922_DEL	FBgn0013759	CASK	INTRON	0	A	ATACAGAA	ATACAGAA	0.1176	4	30	0.8476	5.44374e-07	-
21	8	2L_1988963_SNP	FBgn0031381	Npc2a	DOWNSTREAM	23	A	G	G	0.3846	15	24	-0.4991	1.6854e-06	(TF_binding_site|mE1_TFBS_cad|FBsf0000241132)
21	8	2L_1988963_SNP	FBgn0262148	CR42874	UPSTREAM	487	A	G	G	0.3846	15	24	-0.4991	1.6854e-06	(TF_binding_site|mE1_TFBS_cad|FBsf0000241132)
21	8	2L_1989003_SNP	FBgn0031381	Npc2a	DOWNSTREAM	63	C	A	A	0.4103	16	23	0.5059	1.06794e-06	(TF_binding_site|mE1_TFBS_cad|FBsf0000241132)
21	8	2L_1989003_SNP	FBgn0262148	CR42874	UPSTREAM	447	C	A	A	0.4103	16	23	0.5059	1.06794e-06	(TF_binding_site|mE1_TFBS_cad|FBsf0000241132)
22	1	3L_1347788_SNP	FBgn0003138	Ptp61F	INTRON	0	C	T	C	0.3889	14	22	1.521	9.94062e-07	(TF_binding_site|BDTNP1_TFBS_prd|FBsf0000275306)
22	2	2L_10232558_SNP	FBgn0032198	eEF1delta	UTR_5_PRIME	0	A	G	G	0.1053	4	34	-1.529	7.26669e-08	(TF_binding_site|BDTNP1_TFBS_dl|FBsf0000297861);(TF_binding_site|BDTNP1_TFBS_Med|FBsf0000278199);(TF_binding_site|BDTNP1_TFBS_twi|FBsf0000201393);(TF_binding_site|mE1_TFBS_cad|FBsf0000241805);(TF_binding_site|mE1_TFBS_cnc|FBsf0000206239);(TF_binding_site|mE1_TFBS_HSA|FBsf0000347305);(TF_binding_site|mE1_TFBS_sens|FBsf0000217090);(TF_binding_site|mE1_TFBS_Ubx|FBsf0000261850)
22	2	2L_10232558_SNP	FBgn0032197	CG5694	UPSTREAM	866	A	G	G	0.1053	4	34	-1.529	7.26669e-08	(TF_binding_site|BDTNP1_TFBS_dl|FBsf0000297861);(TF_binding_site|BDTNP1_TFBS_Med|FBsf0000278199);(TF_binding_site|BDTNP1_TFBS_twi|FBsf0000201393);(TF_binding_site|mE1_TFBS_cad|FBsf0000241805);(TF_binding_site|mE1_TFBS_cnc|FBsf0000206239);(TF_binding_site|mE1_TFBS_HSA|FBsf0000347305);(TF_binding_site|mE1_TFBS_sens|FBsf0000217090);(TF_binding_site|mE1_TFBS_Ubx|FBsf0000261850)
22	2	2L_10367193_SNP	FBgn0032231	CG5056	SYNONYMOUS_CODING	0	C	T	T	0.1	4	36	-1.516	9.47732e-08	(TF_binding_site|BDTNP1_TFBS_dl|FBsf0000297920);(TF_binding_site|BDTNP1_TFBS_hb|FBsf0000290740);(TF_binding_site|BDTNP1_TFBS_Med|FBsf0000278230);(TF_binding_site|mE1_TFBS_HSA|FBsf0000347370);(TF_binding_site|mE1_TFBS_sens|FBsf0000217132)
22	2	2L_10367193_SNP	FBgn0032230	lft	DOWNSTREAM	783	C	T	T	0.1	4	36	-1.516	9.47732e-08	(TF_binding_site|BDTNP1_TFBS_dl|FBsf0000297920);(TF_binding_site|BDTNP1_TFBS_hb|FBsf0000290740);(TF_binding_site|BDTNP1_TFBS_Med|FBsf0000278230);(TF_binding_site|mE1_TFBS_HSA|FBsf0000347370);(TF_binding_site|mE1_TFBS_sens|FBsf0000217132)
22	2	2L_10367193_SNP	FBgn0041723	rho-5	DOWNSTREAM	832	C	T	T	0.1	4	36	-1.516	9.47732e-08	(TF_binding_site|BDTNP1_TFBS_dl|FBsf0000297920);(TF_binding_site|BDTNP1_TFBS_hb|FBsf0000290740);(TF_binding_site|BDTNP1_TFBS_Med|FBsf0000278230);(TF_binding_site|mE1_TFBS_HSA|FBsf0000347370);(TF_binding_site|mE1_TFBS_sens|FBsf0000217132)
22	2	2L_10408865_SNP	FBgn0003942	RpS27A	INTRON	0	A	G	G	0.1	4	36	-1.525	6.36854e-08	(TF_binding_site|BDTNP1_TFBS_dl|FBsf0000297939);(TF_binding_site|BDTNP1_TFBS_Med|FBsf0000278247);(TF_binding_site|mE1_TFBS_D|FBsf0000238071);(TF_binding_site|mE1_TFBS_HSA|FBsf0000347388)
22	2	2L_10408865_SNP	FBgn0025366	Ip259	SYNONYMOUS_CODING	0	A	G	G	0.1	4	36	-1.525	6.36854e-08	(TF_binding_site|BDTNP1_TFBS_dl|FBsf0000297939);(TF_binding_site|BDTNP1_TFBS_Med|FBsf0000278247);(TF_binding_site|mE1_TFBS_D|FBsf0000238071);(TF_binding_site|mE1_TFBS_HSA|FBsf0000347388)
22	2	2L_10408865_SNP	FBgn0051718	Ir31a	DOWNSTREAM	668	A	G	G	0.1	4	36	-1.525	6.36854e-08	(TF_binding_site|BDTNP1_TFBS_dl|FBsf0000297939);(TF_binding_site|BDTNP1_TFBS_Med|FBsf0000278247);(TF_binding_site|mE1_TFBS_D|FBsf0000238071);(TF_binding_site|mE1_TFBS_HSA|FBsf0000347388)
22	2	2L_10409141_SNP	FBgn0003942	RpS27A	INTRON	0	C	T	T	0.1	4	36	-1.525	6.36854e-08	(TF_binding_site|BDTNP1_TFBS_dl|FBsf0000297939);(TF_binding_site|mE1_TFBS_HSA|FBsf0000347388);(TF_binding_site|mE1_TFBS_sens|FBsf0000217141)
22	2	2L_10409141_SNP	FBgn0025366	Ip259	SYNONYMOUS_CODING	0	C	T	T	0.1	4	36	-1.525	6.36854e-08	(TF_binding_site|BDTNP1_TFBS_dl|FBsf0000297939);(TF_binding_site|mE1_TFBS_HSA|FBsf0000347388);(TF_binding_site|mE1_TFBS_sens|FBsf0000217141)
22	2	2L_10409141_SNP	FBgn0051718	Ir31a	DOWNSTREAM	944	C	T	T	0.1	4	36	-1.525	6.36854e-08	(TF_binding_site|BDTNP1_TFBS_dl|FBsf0000297939);(TF_binding_site|mE1_TFBS_HSA|FBsf0000347388);(TF_binding_site|mE1_TFBS_sens|FBsf0000217141)
22	2	2L_10409147_SNP	FBgn0003942	RpS27A	INTRON	0	G	A	A	0.1	4	36	-1.525	6.36854e-08	(TF_binding_site|BDTNP1_TFBS_dl|FBsf0000297939);(TF_binding_site|mE1_TFBS_HSA|FBsf0000347388);(TF_binding_site|mE1_TFBS_sens|FBsf0000217141)
22	2	2L_10409147_SNP	FBgn0025366	Ip259	SYNONYMOUS_CODING	0	G	A	A	0.1	4	36	-1.525	6.36854e-08	(TF_binding_site|BDTNP1_TFBS_dl|FBsf0000297939);(TF_binding_site|mE1_TFBS_HSA|FBsf0000347388);(TF_binding_site|mE1_TFBS_sens|FBsf0000217141)
22	2	2L_10409147_SNP	FBgn0051718	Ir31a	DOWNSTREAM	950	G	A	A	0.1	4	36	-1.525	6.36854e-08	(TF_binding_site|BDTNP1_TFBS_dl|FBsf0000297939);(TF_binding_site|mE1_TFBS_HSA|FBsf0000347388);(TF_binding_site|mE1_TFBS_sens|FBsf0000217141)
22	2	2L_16504319_MNP	FBgn0032586	Tpr2	INTRON	0	CCC	ATA	ATA	0.1081	4	33	-1.594	8.08525e-09	-
22	2	2L_18888149_SNP	Intergenic	Intergenic			A	G	G	0.1081	4	33	-1.482	3.16883e-07	(TF_binding_site|BDTNP1_TFBS_dl|FBsf0000299284)
22	2	2L_18888706_SNP	Intergenic	Intergenic			C	G	G	0.1	4	36	-1.499	1.32283e-07	(TF_binding_site|mE1_TFBS_cad|FBsf0000242366);(TF_binding_site|mE1_TFBS_HSA|FBsf0000352288);(TF_binding_site|mE1_TFBS_Kr|FBsf0000253317)
22	2	2L_18889001_SNP	Intergenic	Intergenic			A	G	G	0.1	4	36	-1.47	3.86214e-07	(TF_binding_site|mE1_TFBS_cad|FBsf0000242366);(TF_binding_site|mE1_TFBS_Kr|FBsf0000253317)
22	2	2L_18964664_SNP	FBgn0015772	Nak	SYNONYMOUS_CODING	0	T	C	C	0.1282	5	34	-1.363	1.47448e-07	(TF_binding_site|mE1_TFBS_HSA|FBsf0000352321);(TF_binding_site|mE1_TFBS_sens|FBsf0000218210)
22	2	2L_18964988_SNP	FBgn0015772	Nak	SYNONYMOUS_CODING	0	C	T	T	0.1282	5	34	-1.363	1.47448e-07	(TF_binding_site|mE1_TFBS_HSA|FBsf0000352321);(TF_binding_site|mE1_TFBS_sens|FBsf0000218210)
22	2	2L_18992804_SNP	FBgn0032734	CG15169	DOWNSTREAM	395	G	C	G	0.1351	5	32	-1.365	1.81988e-07	(TF_binding_site|mE1_TFBS_inv|FBsf0000235062)
22	2	2L_18992804_SNP	FBgn0046302	CG10650	DOWNSTREAM	556	G	C	G	0.1351	5	32	-1.365	1.81988e-07	(TF_binding_site|mE1_TFBS_inv|FBsf0000235062)
22	2	2L_19002436_SNP	FBgn0051792	CG31792	NON_SYNONYMOUS_CODING	0	A	G	G	0.1282	5	34	-1.358	1.89997e-07	-
22	2	2L_19002436_SNP	FBgn0051793	CG31793	UPSTREAM	931	A	G	G	0.1282	5	34	-1.358	1.89997e-07	-
22	2	2L_19005467_SNP	FBgn0051793	CG31793	SYNONYMOUS_CODING	0	G	A	A	0.1026	4	35	-1.512	9.59532e-08	(TF_binding_site|mE1_TFBS_chinmo|FBsf0000207797)
22	2	2L_19009614_SNP	FBgn0086710	RpL30	UPSTREAM	308	C	T	T	0.1212	4	29	-1.51	1.60061e-07	(TF_binding_site|BDTNP1_TFBS_dl|FBsf0000299322);(TF_binding_site|BDTNP1_TFBS_Med|FBsf0000278926);(TF_binding_site|mE1_TFBS_bab1|FBsf0000214123);(TF_binding_site|mE1_TFBS_HSA|FBsf0000352343);(TF_binding_site|mE1_TFBS_jumu|FBsf0000254141);(TF_binding_site|mE1_TFBS_sens|FBsf0000218224)
22	2	2L_19009614_SNP	FBgn0086039	snoRNA:Me28S-A2113	UPSTREAM	931	C	T	T	0.1212	4	29	-1.51	1.60061e-07	(TF_binding_site|BDTNP1_TFBS_dl|FBsf0000299322);(TF_binding_site|BDTNP1_TFBS_Med|FBsf0000278926);(TF_binding_site|mE1_TFBS_bab1|FBsf0000214123);(TF_binding_site|mE1_TFBS_HSA|FBsf0000352343);(TF_binding_site|mE1_TFBS_jumu|FBsf0000254141);(TF_binding_site|mE1_TFBS_sens|FBsf0000218224)
22	2	2L_20021154_SNP	Intergenic	Intergenic			T	C	C	0.1	4	36	-1.555	2.89987e-08	-
22	2	2L_2075118_SNP	FBgn0053516	dpr3	INTRON	0	A	G	G	0.1026	4	35	-1.369	1.8018e-07	-
22	2	2L_3416180_SNP	FBgn0031530	pgant2	INTRON	0	T	G	G	0.1	4	36	-1.493	1.54523e-07	-
22	2	2L_3416180_SNP	FBgn0051952	CG31952	UPSTREAM	513	T	G	G	0.1	4	36	-1.493	1.54523e-07	-
22	2	2L_6079812_SNP	FBgn0265999	CR44773	EXON	0	C	G	G	0.1	4	36	-1.381	1.20078e-07	(TF_binding_site|BDTNP1_TFBS_da|FBsf0000321602);(TF_binding_site|BDTNP1_TFBS_dl|FBsf0000296959);(TF_binding_site|BDTNP1_TFBS_Med|FBsf0000277722);(TF_binding_site|BDTNP1_TFBS_sna|FBsf0000268390);(TF_binding_site|BDTNP1_TFBS_twi|FBsf0000200986);(TF_binding_site|BDTNP1_TFBS_z|FBsf0000196055);(TF_binding_site|mE1_TFBS_HSA|FBsf0000345911);(TF_binding_site|mE1_TFBS_Trl|FBsf0000337271)
22	2	2L_6079812_SNP	FBgn0031778	CR9162	DOWNSTREAM	76	C	G	G	0.1	4	36	-1.381	1.20078e-07	(TF_binding_site|BDTNP1_TFBS_da|FBsf0000321602);(TF_binding_site|BDTNP1_TFBS_dl|FBsf0000296959);(TF_binding_site|BDTNP1_TFBS_Med|FBsf0000277722);(TF_binding_site|BDTNP1_TFBS_sna|FBsf0000268390);(TF_binding_site|BDTNP1_TFBS_twi|FBsf0000200986);(TF_binding_site|BDTNP1_TFBS_z|FBsf0000196055);(TF_binding_site|mE1_TFBS_HSA|FBsf0000345911);(TF_binding_site|mE1_TFBS_Trl|FBsf0000337271)
22	2	2L_9301167_SNP	FBgn0267252	Ggamma30A	UTR_3_PRIME	0	A	T	T	0.1081	4	33	-1.37	1.97939e-07	-
22	2	2L_950909_SNP	FBgn0028481	CG4341	INTRON	0	G	T	T	0.175	7	33	-1.113	3.08907e-07	(TF_binding_site|mE1_TFBS_chinmo|FBsf0000206937)
22	2	2L_950913_SNP	FBgn0028481	CG4341	INTRON	0	T	A	A	0.175	7	33	-1.113	3.08907e-07	(TF_binding_site|mE1_TFBS_chinmo|FBsf0000206937)
22	2	2R_11613733_SNP	Intergenic	Intergenic			C	G	G	0.1053	4	34	-1.455	3.42456e-07	-
22	2	2R_13170583_SNP	FBgn0265487	mbl	INTRON	0	T	C	C	0.1	4	36	-1.515	9.5707e-08	-
22	2	2R_14554809_SNP	FBgn0023214	edl	DOWNSTREAM	223	T	G	G	0.1026	4	35	-1.546	3.06158e-08	(TF_binding_site|BDTNP1_TFBS_twi|FBsf0000199777);(TF_binding_site|mE1_TFBS_HSA|FBsf0000358188)
22	2	2R_14554814_SNP	FBgn0023214	edl	DOWNSTREAM	218	A	T	T	0.1026	4	35	-1.546	3.15348e-08	(TF_binding_site|BDTNP1_TFBS_twi|FBsf0000199777);(TF_binding_site|mE1_TFBS_HSA|FBsf0000358188)
22	2	2R_17805071_SNP	FBgn0085397	Fili	INTRON	0	T	C	C	0.1	4	36	-1.461	3.69488e-07	-
22	2	2R_19685763_SNP	FBgn0034903	CG9850	UTR_5_PRIME	0	A	C	C	0.1026	4	35	-1.387	1.01248e-07	(TF_binding_site|BDTNP1_TFBS_z|FBsf0000196813);(TF_binding_site|mE1_TFBS_HSA|FBsf0000359929)
22	2	2R_5337454_SNP	FBgn0259234	Camta	SYNONYMOUS_CODING	0	A	C	C	0.1	4	36	-1.526	5.89496e-08	(TF_binding_site|mE1_TFBS_cad|FBsf0000246187);(TF_binding_site|mE1_TFBS_chinmo|FBsf0000210992);(TF_binding_site|mE1_TFBS_HSA|FBsf0000354925)
22	2	2R_8552562_SNP	FBgn0261673	nemy	INTRON	0	T	G	G	0.1026	4	35	-1.51	1.03482e-07	-
22	2	2R_8552663_SNP	FBgn0261673	nemy	INTRON	0	G	A	A	0.1	4	36	-1.515	9.5707e-08	-
22	2	2R_9436996_SNP	FBgn0053156	CG33156	SYNONYMOUS_CODING	0	A	G	G	0.1	4	36	-1.577	1.2651e-08	(TF_binding_site|mE1_TFBS_inv|FBsf0000236565)
22	2	2R_9921829_SNP	FBgn0002643	mam	INTRON	0	T	C	C	0.1	4	36	-1.555	2.89987e-08	-
22	2	3L_10243561_SNP	Intergenic	Intergenic			A	G	G	0.1026	4	35	-1.37	1.05571e-07	-
22	2	3L_11736445_SNP	FBgn0036202	CG6024	INTRON	0	A	T	T	0.1053	4	34	-1.375	1.02875e-07	(TF_binding_site|mE1_TFBS_inv|FBsf0000235953)
22	2	3L_11736451_SNP	FBgn0036202	CG6024	INTRON	0	A	G	G	0.1053	4	34	-1.375	1.02875e-07	(TF_binding_site|mE1_TFBS_inv|FBsf0000235953)
22	2	3L_12139271_SNP	FBgn0036258	CG5642	UPSTREAM	74	C	T	T	0.1026	4	35	-1.535	4.84029e-08	(TF_binding_site|BDTNP1_TFBS_dl|FBsf0000306997);(TF_binding_site|BDTNP1_TFBS_twi|FBsf0000203540);(TF_binding_site|mE1_TFBS_bab1|FBsf0000214485);(TF_binding_site|mE1_TFBS_cad|FBsf0000244811);(TF_binding_site|mE1_TFBS_D|FBsf0000239309);(TF_binding_site|mE1_TFBS_Dll|FBsf0000206113);(TF_binding_site|mE1_TFBS_h|FBsf0000257068);(TF_binding_site|mE1_TFBS_HSA|FBsf0000364463);(TF_binding_site|mE1_TFBS_jum…
22	2	3L_12139271_SNP	FBgn0013997	Nrx-IV	UPSTREAM	348	C	T	T	0.1026	4	35	-1.535	4.84029e-08	(TF_binding_site|BDTNP1_TFBS_dl|FBsf0000306997);(TF_binding_site|BDTNP1_TFBS_twi|FBsf0000203540);(TF_binding_site|mE1_TFBS_bab1|FBsf0000214485);(TF_binding_site|mE1_TFBS_cad|FBsf0000244811);(TF_binding_site|mE1_TFBS_D|FBsf0000239309);(TF_binding_site|mE1_TFBS_Dll|FBsf0000206113);(TF_binding_site|mE1_TFBS_h|FBsf0000257068);(TF_binding_site|mE1_TFBS_HSA|FBsf0000364463);(TF_binding_site|mE1_TFBS_jum…
22	2	3L_12140069_SNP	FBgn0013997	Nrx-IV	INTRON	0	T	C	C	0.1	4	36	-1.545	3.29626e-08	(TF_binding_site|BDTNP1_TFBS_dl|FBsf0000306998);(TF_binding_site|BDTNP1_TFBS_Med|FBsf0000282862);(TF_binding_site|BDTNP1_TFBS_twi|FBsf0000203540);(TF_binding_site|BDTNP1_TFBS_z|FBsf0000197141);(TF_binding_site|mE1_TFBS_HSA|FBsf0000364463);(TF_binding_site|mE1_TFBS_sens|FBsf0000224062);(TF_binding_site|mE1_TFBS_Trl|FBsf0000339879)
22	2	3L_12140069_SNP	FBgn0036258	CG5642	UPSTREAM	872	T	C	C	0.1	4	36	-1.545	3.29626e-08	(TF_binding_site|BDTNP1_TFBS_dl|FBsf0000306998);(TF_binding_site|BDTNP1_TFBS_Med|FBsf0000282862);(TF_binding_site|BDTNP1_TFBS_twi|FBsf0000203540);(TF_binding_site|BDTNP1_TFBS_z|FBsf0000197141);(TF_binding_site|mE1_TFBS_HSA|FBsf0000364463);(TF_binding_site|mE1_TFBS_sens|FBsf0000224062);(TF_binding_site|mE1_TFBS_Trl|FBsf0000339879)
22	2	3L_12140862_SNP	FBgn0013997	Nrx-IV	INTRON	0	T	C	C	0.1026	4	35	-1.536	4.78403e-08	(TF_binding_site|BDTNP1_TFBS_dl|FBsf0000306999);(TF_binding_site|BDTNP1_TFBS_Med|FBsf0000282863);(TF_binding_site|BDTNP1_TFBS_twi|FBsf0000203540);(TF_binding_site|mE1_TFBS_Trl|FBsf0000339879)
22	2	3L_13543545_SNP	FBgn0264001	bru-3	INTRON	0	T	C	C	0.1	4	36	-1.545	3.29626e-08	-
22	2	3L_13543833_SNP	FBgn0264001	bru-3	INTRON	0	A	C	C	0.1026	4	35	-1.535	4.84029e-08	-
22	2	3L_14187940_SNP	FBgn0013718	nuf	INTRON	0	T	C	T	0.1316	5	33	-1.353	2.29704e-07	(TF_binding_site|BDTNP1_TFBS_da|FBsf0000327008);(TF_binding_site|BDTNP1_TFBS_dl|FBsf0000307404);(TF_binding_site|BDTNP1_TFBS_sna|FBsf0000269414);(TF_binding_site|BDTNP1_TFBS_twi|FBsf0000203777);(TF_binding_site|mE1_TFBS_cad|FBsf0000244989);(TF_binding_site|mE1_TFBS_HSA|FBsf0000365115)
22	2	3L_15703431_SNP	Intergenic	Intergenic			C	T	C	0.1053	4	34	-1.469	3.4051e-07	(TF_binding_site|BDTNP1_TFBS_da|FBsf0000327253);(TF_binding_site|BDTNP1_TFBS_dl|FBsf0000307779);(TF_binding_site|BDTNP1_TFBS_twi|FBsf0000203950)
22	2	3L_15703725_SNP	Intergenic	Intergenic			C	T	C	0.1053	4	34	-1.469	3.4051e-07	(TF_binding_site|BDTNP1_TFBS_da|FBsf0000327254);(TF_binding_site|BDTNP1_TFBS_dl|FBsf0000307779);(TF_binding_site|BDTNP1_TFBS_hb|FBsf0000291468);(TF_binding_site|BDTNP1_TFBS_Med|FBsf0000283291);(TF_binding_site|BDTNP1_TFBS_sna|FBsf0000269472);(TF_binding_site|BDTNP1_TFBS_twi|FBsf0000203950);(TF_binding_site|mE1_TFBS_cad|FBsf0000245101);(TF_binding_site|mE1_TFBS_D|FBsf0000239417)
22	2	3L_19550833_SNP	FBgn0265888	CR44677	UPSTREAM	531	T	A	A	0.1111	4	32	-1.377	1.17224e-07	(TF_binding_site|BDTNP1_TFBS_bcd|FBsf0000333944);(TF_binding_site|BDTNP1_TFBS_da|FBsf0000327640);(TF_binding_site|BDTNP1_TFBS_dl|FBsf0000308595);(TF_binding_site|BDTNP1_TFBS_hb|FBsf0000291576);(TF_binding_site|BDTNP1_TFBS_twi|FBsf0000204289);(TF_binding_site|mE1_TFBS_HSA|FBsf0000366862);(TF_binding_site|mE1_TFBS_Trl|FBsf0000340315)
22	2	3L_20584754_SNP	Intergenic	Intergenic			C	T	T	0.1053	4	34	-1.384	7.55145e-08	-
22	2	3L_21373667_SNP	Intergenic	Intergenic			A	C	C	0.1081	4	33	-1.365	1.35619e-07	-
22	2	3L_4369954_SNP	FBgn0035538	DopEcR	SYNONYMOUS_CODING	0	G	A	A	0.1	4	36	-1.547	2.87189e-08	-
22	2	3L_4615946_SNP	FBgn0262733	Src64B	INTRON	0	A	G	G	0.1	4	36	-1.485	2.02048e-07	-
22	2	3L_4729095_SNP	FBgn0035574	RhoGEF64C	INTRON	0	A	C	C	0.1	4	36	-1.577	1.2651e-08	-
22	2	3L_7086548_SNP	FBgn0035737	Cpr65Ec	SYNONYMOUS_CODING	0	C	T	T	0.1053	4	34	-1.496	1.63723e-07	(TF_binding_site|mE1_TFBS_inv|FBsf0000235826)
22	2	3L_7129437_SNP	FBgn0023001	melt	INTRON	0	G	T	T	0.1	4	36	-1.525	6.36854e-08	(TF_binding_site|BDTNP1_TFBS_dl|FBsf0000306026);(TF_binding_site|BDTNP1_TFBS_gt|FBsf0000293839);(TF_binding_site|BDTNP1_TFBS_Med|FBsf0000282375);(TF_binding_site|BDTNP1_TFBS_twi|FBsf0000203127);(TF_binding_site|mE1_TFBS_HSA|FBsf0000362870)
22	2	3L_7129470_SNP	FBgn0023001	melt	INTRON	0	G	C	C	0.1	4	36	-1.525	6.36854e-08	(TF_binding_site|BDTNP1_TFBS_dl|FBsf0000306026);(TF_binding_site|BDTNP1_TFBS_gt|FBsf0000293839);(TF_binding_site|BDTNP1_TFBS_Med|FBsf0000282375);(TF_binding_site|BDTNP1_TFBS_twi|FBsf0000203127);(TF_binding_site|mE1_TFBS_HSA|FBsf0000362870)
22	2	3L_7129473_SNP	FBgn0023001	melt	INTRON	0	G	C	C	0.1	4	36	-1.525	6.36854e-08	(TF_binding_site|BDTNP1_TFBS_dl|FBsf0000306026);(TF_binding_site|BDTNP1_TFBS_gt|FBsf0000293839);(TF_binding_site|BDTNP1_TFBS_Med|FBsf0000282375);(TF_binding_site|BDTNP1_TFBS_twi|FBsf0000203127);(TF_binding_site|mE1_TFBS_HSA|FBsf0000362870)
22	2	3L_7129475_SNP	FBgn0023001	melt	INTRON	0	A	C	C	0.1	4	36	-1.525	6.36854e-08	(TF_binding_site|BDTNP1_TFBS_dl|FBsf0000306026);(TF_binding_site|BDTNP1_TFBS_gt|FBsf0000293839);(TF_binding_site|BDTNP1_TFBS_Med|FBsf0000282375);(TF_binding_site|BDTNP1_TFBS_twi|FBsf0000203127);(TF_binding_site|mE1_TFBS_HSA|FBsf0000362870)
22	2	3L_7129483_SNP	FBgn0023001	melt	INTRON	0	T	A	A	0.1	4	36	-1.525	6.36854e-08	(TF_binding_site|BDTNP1_TFBS_dl|FBsf0000306026);(TF_binding_site|BDTNP1_TFBS_gt|FBsf0000293839);(TF_binding_site|BDTNP1_TFBS_Med|FBsf0000282375);(TF_binding_site|BDTNP1_TFBS_twi|FBsf0000203127);(TF_binding_site|mE1_TFBS_HSA|FBsf0000362870)
22	2	3R_12338916_SNP	FBgn0259244	CG42342	UTR_5_PRIME	0	T	G	G	0.1026	4	35	-1.37	1.05571e-07	(TF_binding_site|mE1_TFBS_chinmo|FBsf0000212809)
22	2	3R_14308671_SNP	FBgn0004652	fru	INTRON	0	G	A	A	0.1053	4	34	-1.509	1.23421e-07	-
22	2	3R_17306839_SNP	Intergenic	Intergenic			G	A	A	0.1026	4	35	-1.463	3.77306e-07	-
22	2	3R_20720454_SNP	FBgn0039244	CG11069	UPSTREAM	10	A	C	C	0.125	5	35	-1.25	2.75018e-07	(TF_binding_site|BDTNP1_TFBS_da|FBsf0000330419);(TF_binding_site|BDTNP1_TFBS_dl|FBsf0000313932);(TF_binding_site|BDTNP1_TFBS_Med|FBsf0000286486);(TF_binding_site|BDTNP1_TFBS_twi|FBsf0000266004);(TF_binding_site|BDTNP1_TFBS_z|FBsf0000197859);(TF_binding_site|mE1_TFBS_HSA|FBsf0000374992);(TF_binding_site|mE1_TFBS_Trl|FBsf0000341689)
22	2	3R_20720454_SNP	FBgn0051121	CG31121	UPSTREAM	127	A	C	C	0.125	5	35	-1.25	2.75018e-07	(TF_binding_site|BDTNP1_TFBS_da|FBsf0000330419);(TF_binding_site|BDTNP1_TFBS_dl|FBsf0000313932);(TF_binding_site|BDTNP1_TFBS_Med|FBsf0000286486);(TF_binding_site|BDTNP1_TFBS_twi|FBsf0000266004);(TF_binding_site|BDTNP1_TFBS_z|FBsf0000197859);(TF_binding_site|mE1_TFBS_HSA|FBsf0000374992);(TF_binding_site|mE1_TFBS_Trl|FBsf0000341689)
22	2	3R_20911134_SNP	FBgn0004897	fd96Ca	DOWNSTREAM	534	C	A	A	0.1143	4	31	-1.484	2.76186e-07	(TF_binding_site|BDTNP1_TFBS_twi|FBsf0000266022)
22	2	3R_20929992_SNP	FBgn0054027	CG34027	SYNONYMOUS_CODING	0	A	G	G	0.1026	4	35	-1.467	3.36695e-07	-
22	2	3R_20929992_SNP	FBgn0266534	CG45095	DOWNSTREAM	653	A	G	G	0.1026	4	35	-1.467	3.36695e-07	-
22	2	3R_20930169_SNP	FBgn0054027	CG34027	INTRON	0	T	C	C	0.1026	4	35	-1.467	3.36695e-07	-
22	2	3R_20930169_SNP	FBgn0266534	CG45095	DOWNSTREAM	830	T	C	C	0.1026	4	35	-1.467	3.36695e-07	-
22	2	3R_22913613_SNP	FBgn0039480	Cpr97Ea	UPSTREAM	113	A	G	G	0.1053	4	34	-1.574	1.60502e-08	-
22	2	3R_24805361_SNP	Intergenic	Intergenic			C	G	G	0.1026	4	35	-1.463	3.71344e-07	-
22	2	3R_2546751_SNP	FBgn0051481	pb	INTRON	0	A	G	G	0.1	4	36	-1.499	1.32283e-07	(regulatory_region|REDfly_CRMs|FBsf0000436456)
22	2	3R_4824117_SNP	FBgn0051100	CG31100	INTRON	0	C	T	T	0.1316	5	33	-1.329	3.49251e-07	-
22	2	3R_4824117_SNP	FBgn0037650	CG11977	SYNONYMOUS_CODING	0	C	T	T	0.1316	5	33	-1.329	3.49251e-07	-
22	2	3R_5716147_SNP	FBgn0267336	Glut4EF	INTRON	0	A	C	C	0.1053	4	34	-1.527	6.58653e-08	(TF_binding_site|mE1_TFBS_zfh1|FBsf0000334966)
22	2	3R_6502171_SNP	FBgn0037818	CG6465	SYNONYMOUS_CODING	0	A	T	T	0.1	4	36	-1.381	1.20078e-07	-
22	2	3R_9522050_SNP	FBgn0028487	f-cup	NON_SYNONYMOUS_CODING	0	A	T	T	0.1026	4	35	-1.525	7.60564e-08	-
22	2	3R_9522050_SNP	FBgn0038170	CG14367	DOWNSTREAM	815	A	T	T	0.1026	4	35	-1.525	7.60564e-08	-
22	2	3R_9999082_SNP	FBgn0011582	Dop1R1	UTR_3_PRIME	0	G	T	T	0.125	5	35	-1.337	2.48659e-07	-
22	2	X_17725864_SNP	FBgn0030870	CG6398	INTRON	0	C	T	T	0.1053	4	34	-1.538	4.60282e-08	(TF_binding_site|BDTNP1_TFBS_da|FBsf0000332902);(TF_binding_site|BDTNP1_TFBS_dl|FBsf0000319931);(TF_binding_site|BDTNP1_TFBS_Med|FBsf0000289005);(TF_binding_site|BDTNP1_TFBS_sna|FBsf0000270387);(TF_binding_site|BDTNP1_TFBS_twi|FBsf0000263598);(TF_binding_site|mE1_TFBS_cad|FBsf0000243608)
22	2	X_17725864_SNP	FBgn0265902	CR44691	UPSTREAM	737	C	T	T	0.1053	4	34	-1.538	4.60282e-08	(TF_binding_site|BDTNP1_TFBS_da|FBsf0000332902);(TF_binding_site|BDTNP1_TFBS_dl|FBsf0000319931);(TF_binding_site|BDTNP1_TFBS_Med|FBsf0000289005);(TF_binding_site|BDTNP1_TFBS_sna|FBsf0000270387);(TF_binding_site|BDTNP1_TFBS_twi|FBsf0000263598);(TF_binding_site|mE1_TFBS_cad|FBsf0000243608)
22	2	X_19584466_SNP	FBgn0086384	Mer	DOWNSTREAM	161	A	G	G	0.1053	4	34	-1.41	6.10431e-08	(TF_binding_site|BDTNP1_TFBS_dl|FBsf0000320423);(TF_binding_site|BDTNP1_TFBS_Med|FBsf0000289187);(TF_binding_site|mE1_TFBS_HSA|FBsf0000349692);(TF_binding_site|mE1_TFBS_Trl|FBsf0000205950)
22	2	X_19585860_SNP	FBgn0086384	Mer	SYNONYMOUS_CODING	0	A	G	G	0.1	4	36	-1.494	1.51118e-07	(TF_binding_site|mE1_TFBS_sens|FBsf0000221794)
22	2	X_19904264_SNP	FBgn0053517	Dop2R	INTRON	0	A	G	G	0.1026	4	35	-1.531	5.48192e-08	-
22	2	X_20118336_SNP	FBgn0022770	Peritrophin-A	SYNONYMOUS_CODING	0	T	C	C	0.1026	4	35	-1.374	1.60236e-07	(TF_binding_site|BDTNP1_TFBS_da|FBsf0000333207);(TF_binding_site|mE1_TFBS_cad|FBsf0000243771);(TF_binding_site|mE1_TFBS_chinmo|FBsf0000209321);(TF_binding_site|mE1_TFBS_HSA|FBsf0000349859)
22	2	X_4527046_SNP	FBgn0025388	CG12179	NON_SYNONYMOUS_CODING	0	G	T	T	0.1143	4	31	-1.48	3.04695e-07	-
22	2	X_4965559_SNP	FBgn0052767	CG32767	UTR_3_PRIME	0	A	G	G	0.1081	4	33	-1.508	1.15484e-07	-
22	2	X_4965559_SNP	FBgn0003028	ovo	DOWNSTREAM	597	A	G	G	0.1081	4	33	-1.508	1.15484e-07	-
22	2	X_8672729_SNP	FBgn0026411	Lim1	INTRON	0	A	G	G	0.1026	4	35	-1.55	3.05465e-08	(TF_binding_site|BDTNP1_TFBS_dl|FBsf0000317777);(TF_binding_site|BDTNP1_TFBS_twi|FBsf0000205513)
22	3	3L_2366259_SNP	Intergenic	Intergenic			A	G	G	0.2821	11	28	0.8112	3.07383e-07	-
22	3	3L_2366260_SNP	Intergenic	Intergenic			G	T	T	0.2895	11	27	0.808	4.37067e-07	-
22	3	3L_2366262_SNP	Intergenic	Intergenic			T	G	G	0.2821	11	28	0.8103	4.78646e-07	-
22	3	3R_13676339_SNP	FBgn0261649	tinc	INTRON	0	A	G	G	0.4054	15	22	0.7214	2.03471e-06	-
22	4	3R_26186604_SNP	FBgn0010113	hdc	SYNONYMOUS_CODING	0	G	A	G	0.3429	12	23	-0.7034	1.09721e-06	(TF_binding_site|mE1_TFBS_cad|FBsf0000249579)
22	5	X_20513505_SNP	Intergenic	Intergenic			T	A	A	0.359	14	25	-0.5605	1.45363e-07	(TF_binding_site|BDTNP1_TFBS_slp1|FBsf0000273629)
22	5	X_21248549_SNP	FBgn0003423	slgA	INTRON	0	A	G	A	0.4103	16	23	0.5403	2.32944e-07	-
23	2	2L_803467_SNP	Intergenic	Intergenic			C	A	A	0.4	16	24	0.7716	1.21717e-07	(TF_binding_site|mE1_TFBS_chinmo|FBsf0000206905)
23	3	2L_12955194_SNP	Intergenic	Intergenic			A	G	G	0.2821	11	28	0.6587	1.77764e-06	-
23	4	2R_7206255_SNP	FBgn0016047	nompA	UPSTREAM	74	T	C	C	0.3947	15	23	0.4929	1.83145e-06	-
23	4	2R_7206255_SNP	FBgn0026385	Or47b	DOWNSTREAM	960	T	C	C	0.3947	15	23	0.4929	1.83145e-06	-
23	4	3R_26895109_SNP	FBgn0024288	Sox100B	INTRON	0	C	T	T	0.4737	18	20	-0.506	2.99607e-07	(TF_binding_site|BDTNP1_TFBS_twi|FBsf0000266520);(TF_binding_site|mE1_TFBS_HSA|FBsf0000376918)
23	4	X_19159615_SNP	FBgn0040068	Vav	INTRON	0	A	G	A	0.2105	8	30	-0.5705	1.42757e-06	(TF_binding_site|mE1_TFBS_HSA|FBsf0000349515)
24	1	3L_2974482_INS	Intergenic	Intergenic			TC	T	T	0.2051	8	31	2.569	1.82184e-06	-
24	2	X_20390156_SNP	FBgn0026323	Tak1	INTRON	0	G	T	T	0.375	15	25	-1.059	1.54965e-06	(TF_binding_site|mE1_TFBS_cnc|FBsf0000206847)
24	3	2L_10093133_SNP	FBgn0265002	CG44153	INTRON	0	T	A	A	0.1	4	36	-1.418	1.5048e-06	-
24	3	2L_10093133_SNP	FBgn0032181	CG13133	UPSTREAM	744	T	A	A	0.1	4	36	-1.418	1.5048e-06	-
24	3	2L_10093133_SNP	FBgn0083945	CG34109	UPSTREAM	955	T	A	A	0.1	4	36	-1.418	1.5048e-06	-
24	3	2L_11181141_SNP	FBgn0259822	Ca-beta	INTRON	0	T	G	G	0.1026	4	35	-1.439	1.08756e-06	(TF_binding_site|mE1_TFBS_cad|FBsf0000241886)
24	3	2L_11181141_SNP	FBgn0032354	CG4788	DOWNSTREAM	711	T	G	G	0.1026	4	35	-1.439	1.08756e-06	(TF_binding_site|mE1_TFBS_cad|FBsf0000241886)
24	3	2L_12111780_SNP	FBgn0263235	Phae2	SYNONYMOUS_CODING	0	T	C	C	0.1	4	36	-1.429	1.3298e-06	(TF_binding_site|mE1_TFBS_cad|FBsf0000241955)
24	3	3L_1747658_DEL	FBgn0035267	CG13921	CODON_CHANGE_PLUS_CODON_DELETION	0	A	ATCAGCA	ATCAGCA	0.1081	4	33	-1.432	1.08718e-06	(TF_binding_site|BDTNP1_TFBS_dl|FBsf0000305090);(TF_binding_site|BDTNP1_TFBS_Med|FBsf0000281900);(TF_binding_site|BDTNP1_TFBS_slp1|FBsf0000272414);(TF_binding_site|BDTNP1_TFBS_twi|FBsf0000202713);(TF_binding_site|mE1_TFBS_cad|FBsf0000243996);(TF_binding_site|mE1_TFBS_chinmo|FBsf0000209577)
24	3	3L_1750541_SNP	FBgn0035267	CG13921	SYNONYMOUS_CODING	0	A	G	G	0.1579	6	32	-1.193	1.65337e-06	(TF_binding_site|mE1_TFBS_chinmo|FBsf0000209577)
24	3	3L_511101_INS	FBgn0001316	klar	INTRON	0	GAG	G	G	0.1026	4	35	-1.411	2.12488e-06	-
24	4	2L_3778006_DEL	FBgn0004893	bowl	INTRON	0	A	AA	AA	0.4	14	21	0.8729	4.81594e-07	(TF_binding_site|mE1_TFBS_HSA|FBsf0000345076)
24	4	2R_7934254_SNP	FBgn0024732	Drep-1	INTRON	0	G	C	C	0.4615	18	21	0.7634	1.80159e-06	-
24	5	2L_11591899_SNP	FBgn0015400	kek2	INTRON	0	C	T	C	0.3	12	28	-0.8329	6.48326e-07	-
24	5	2L_11591899_SNP	FBgn0267327	Acp33A	UPSTREAM	221	C	T	C	0.3	12	28	-0.8329	6.48326e-07	-
24	5	2L_13916608_SNP	FBgn0032536	Ance-3	INTRON	0	A	G	A	0.475	19	21	-0.7294	2.09754e-06	(TF_binding_site|BDTNP1_TFBS_da|FBsf0000322374);(TF_binding_site|BDTNP1_TFBS_twi|FBsf0000201664);(TF_binding_site|mE1_TFBS_HSA|FBsf0000350946)
24	5	2L_14310376_SNP	FBgn0261563	wb	INTRON	0	G	A	A	0.375	15	25	-0.7877	4.24032e-07	-
24	5	2L_21005475_SNP	FBgn0250867	CG42238	INTRON	0	T	C	T	0.2051	8	31	-0.9509	8.87005e-07	-
24	5	2L_21006971_SNP	FBgn0250867	CG42238	INTRON	0	A	G	A	0.2973	11	26	-0.819	1.35291e-06	-
24	5	3L_7183771_SNP	FBgn0265296	Dscam2	UPSTREAM	740	G	A	G	0.2	8	32	-0.9256	1.82198e-06	-
24	5	3L_7183802_SNP	FBgn0265296	Dscam2	UPSTREAM	771	A	G	A	0.1795	7	32	-1.077	3.8767e-08	-
24	5	3R_7437614_SNP	FBgn0051363	Jupiter	INTRON	0	C	A	A	0.1795	7	32	-1.033	2.63112e-07	-
24	5	X_1092614_SNP	FBgn0040358	CG14625	UPSTREAM	965	C	G	G	0.15	6	34	-1.045	1.40042e-06	-
24	5	X_1107753_SNP	FBgn0040366	CG11398	UTR_3_PRIME	0	C	T	T	0.15	6	34	-1.047	1.3581e-06	-
24	5	X_1107797_SNP	FBgn0040366	CG11398	UTR_3_PRIME	0	T	A	A	0.1538	6	33	-1.056	1.08686e-06	-
24	6	X_9769836_SNP	FBgn0030156	CG15247	NON_SYNONYMOUS_CODING	0	G	T	G	0.3	12	28	-0.7123	1.59758e-06	(TF_binding_site|mE1_TFBS_chinmo|FBsf0000208662)
24	7	2L_13669181_SNP	FBgn0028527	CG18507	SYNONYMOUS_CODING	0	A	G	G	0.3333	13	26	-0.7151	3.70189e-07	(TF_binding_site|mE1_TFBS_chinmo|FBsf0000207673)
24	7	2L_20233553_INS	Intergenic	Intergenic			TT	T	T	0.1944	7	29	0.8801	1.86212e-06	-
24	7	3L_4084489_SNP	FBgn0004516	Gad1	INTRON	0	A	T	T	0.2973	11	26	-0.756	1.53543e-06	-
24	7	3R_21188116_SNP	FBgn0004509	Fur1	INTRON	0	C	T	T	0.4571	16	19	-0.6738	1.66707e-06	-
24	7	3R_21188129_DEL	FBgn0004509	Fur1	INTRON	0	G	GAAC	GAAC	0.4324	16	21	-0.6772	8.7668e-07	-
24	7	3R_21188133_DEL	FBgn0004509	Fur1	INTRON	0	T	TTAAAGAGCACA	TTAAAGAGCACA	0.4324	16	21	-0.6772	8.7668e-07	-
24	7	X_20782074_SNP	FBgn0085387	shakB	INTRON	0	C	T	C	0.25	10	30	0.7622	1.94156e-06	-
24	8	3L_5648454_SNP	FBgn0035626	lin-28	INTRON	0	C	T	T	0.4872	19	20	0.5688	1.9215e-06	(TF_binding_site|BDTNP1_TFBS_da|FBsf0000326149);(TF_binding_site|BDTNP1_TFBS_dl|FBsf0000305758);(TF_binding_site|BDTNP1_TFBS_hb|FBsf0000291199);(TF_binding_site|BDTNP1_TFBS_Med|FBsf0000282253);(TF_binding_site|BDTNP1_TFBS_prd|FBsf0000275392);(TF_binding_site|BDTNP1_TFBS_twi|FBsf0000203007);(TF_binding_site|BDTNP1_TFBS_z|FBsf0000196996);(TF_binding_site|mE1_TFBS_HSA|FBsf0000362419);(TF_binding_sit…
24	8	3R_21186166_SNP	FBgn0004509	Fur1	INTRON	0	A	G	G	0.3	12	28	-0.6454	9.72951e-07	(TF_binding_site|mE1_TFBS_inv|FBsf0000237543)
24	8	3R_21186166_SNP	FBgn0039331	CG11913	DOWNSTREAM	410	A	G	G	0.3	12	28	-0.6454	9.72951e-07	(TF_binding_site|mE1_TFBS_inv|FBsf0000237543)
24	8	X_3784867_SNP	FBgn0029681	CG15239	DOWNSTREAM	348	C	T	T	0.3684	14	24	0.6226	4.51729e-07	-
24	8	X_3784867_SNP	FBgn0260658	CG42541	DOWNSTREAM	663	C	T	T	0.3684	14	24	0.6226	4.51729e-07	-
24	9	2L_9098450_SNP	FBgn0051609	CG31609	DOWNSTREAM	275	T	A	A	0.2051	8	31	0.7604	1.60447e-07	-
24	9	2L_9098450_SNP	FBgn0265675	CR44482	UPSTREAM	947	T	A	A	0.2051	8	31	0.7604	1.60447e-07	-
24	9	2L_9098525_SNP	FBgn0051609	CG31609	DOWNSTREAM	350	G	T	T	0.2051	8	31	0.7439	3.86974e-07	-
24	9	2L_9098525_SNP	FBgn0265675	CR44482	UPSTREAM	872	G	T	T	0.2051	8	31	0.7439	3.86974e-07	-
24	9	2R_10575235_SNP	FBgn0020269	mspo	INTRON	0	A	G	G	0.1795	7	32	0.7936	2.06225e-07	-
24	9	2R_10575261_SNP	FBgn0020269	mspo	INTRON	0	G	T	T	0.1842	7	31	0.7894	2.33325e-07	-
24	9	2R_17800946_SNP	FBgn0085397	Fili	INTRON	0	G	C	C	0.3846	15	24	-0.5907	1.87222e-06	-
24	9	3L_8799456_SNP	FBgn0035931	CG13312	SYNONYMOUS_CODING	0	A	G	G	0.2308	9	30	0.6887	1.12966e-06	(TF_binding_site|mE1_TFBS_chinmo|FBsf0000209993);(TF_binding_site|mE1_TFBS_HSA|FBsf0000363442);(TF_binding_site|mE1_TFBS_sbb|FBsf0000250202)
24	9	3L_8799456_SNP	FBgn0085456	CG34427	DOWNSTREAM	544	A	G	G	0.2308	9	30	0.6887	1.12966e-06	(TF_binding_site|mE1_TFBS_chinmo|FBsf0000209993);(TF_binding_site|mE1_TFBS_HSA|FBsf0000363442);(TF_binding_site|mE1_TFBS_sbb|FBsf0000250202)
24	10	2R_9253641_SNP	Intergenic	Intergenic			C	T	C	0.45	18	22	-0.5506	3.31384e-07	-
24	10	3L_14925804_SNP	FBgn0259099	DCX-EMAP	INTRON	0	A	G	G	0.2368	9	29	0.6427	2.06656e-06	-
24	10	3L_9329490_SNP	FBgn0035975	PGRP-LA	INTRON	0	G	A	A	0.2821	11	28	0.6083	1.21431e-06	-
25	1	2L_18000353_SNP	Intergenic	Intergenic			C	A	A	0.1026	4	35	2.558	5.85229e-07	-
25	2	2L_16618254_SNP	FBgn0259735	CG42389	INTRON	0	C	G	G	0.4615	18	21	1.062	1.97985e-07	-
25	2	2L_16618264_SNP	FBgn0259735	CG42389	INTRON	0	G	C	C	0.4474	17	21	1.027	1.40658e-06	-
25	2	2L_7123059_SNP	FBgn0085407	Pvf3	INTRON	0	C	A	C	0.3077	12	27	1.096	4.82986e-07	-
25	2	2R_8282253_SNP	FBgn0033727	Or49a	INTRON	0	T	G	G	0.2632	10	28	1.149	7.86393e-07	-
25	2	2R_8282253_SNP	FBgn0050048	CG30048	UPSTREAM	159	T	G	G	0.2632	10	28	1.149	7.86393e-07	-
25	2	2R_8283776_SNP	FBgn0050048	CG30048	SYNONYMOUS_CODING	0	G	A	A	0.2821	11	28	1.123	5.02247e-07	-
25	2	3L_21470827_SNP	Intergenic	Intergenic			T	C	C	0.3158	12	26	1.107	1.36697e-06	(regulatory_region|REDfly_CRMs|FBsf0000435937);(TF_binding_site|BDTNP1_TFBS_dl|FBsf0000309010);(TF_binding_site|BDTNP1_TFBS_slp1|FBsf0000272739);(TF_binding_site|BDTNP1_TFBS_twi|FBsf0000204462);(TF_binding_site|mE1_TFBS_HSA|FBsf0000367534)
25	3	2R_6501654_SNP	FBgn0263102	psq	INTRON	0	T	C	C	0.2051	8	31	0.9191	1.15272e-06	(TF_binding_site|BDTNP1_TFBS_da|FBsf0000323752);(TF_binding_site|BDTNP1_TFBS_twi|FBsf0000198979);(TF_binding_site|mE1_TFBS_HSA|FBsf0000355357)
25	3	2R_9244154_SNP	Intergenic	Intergenic			C	T	C	0.4286	15	20	-0.8082	5.37691e-07	(TF_binding_site|mE1_TFBS_chinmo|FBsf0000211209)
25	3	3R_14420956_SNP	FBgn0263974	qin	INTRON	0	C	T	T	0.125	5	35	1.113	9.542e-07	-
25	3	3R_14420956_SNP	FBgn0038629	CG14304	INTRON	0	C	T	T	0.125	5	35	1.113	9.542e-07	-
25	3	X_6858513_SNP	FBgn0052732	CG32732	INTRON	0	T	A	A	0.15	6	34	1.019	1.40177e-06	-
25	3	X_6858513_SNP	FBgn0029922	CG14431	INTRON	0	T	A	A	0.15	6	34	1.019	1.40177e-06	-
25	3	X_6858552_SNP	FBgn0029922	CG14431	INTRON	0	C	G	G	0.1538	6	33	1.036	7.1553e-07	-
25	3	X_6858552_SNP	FBgn0052732	CG32732	INTRON	0	C	G	G	0.1538	6	33	1.036	7.1553e-07	-
25	3	X_6858567_SNP	FBgn0029922	CG14431	INTRON	0	T	A	A	0.15	6	34	1.019	1.40177e-06	-
25	3	X_6858567_SNP	FBgn0052732	CG32732	INTRON	0	T	A	A	0.15	6	34	1.019	1.40177e-06	-
25	4	2R_15273019_SNP	FBgn0034441	CG10081	UPSTREAM	409	T	G	G	0.2121	7	26	-0.9767	9.0005e-07	-
25	4	2R_15273019_SNP	FBgn0034440	CG10073	DOWNSTREAM	549	T	G	G	0.2121	7	26	-0.9767	9.0005e-07	-
25	5	3L_17441026_SNP	FBgn0036725	CG18265	INTRON	0	A	G	G	0.3421	13	25	-0.5741	6.73675e-07	-
25	5	3L_17441059_SNP	FBgn0036725	CG18265	INTRON	0	T	A	A	0.3421	13	25	-0.5741	6.73675e-07	-
25	5	3L_17441083_SNP	FBgn0036725	CG18265	INTRON	0	G	C	C	0.359	14	25	-0.5491	1.20944e-06	-
25	6	2L_8532096_SNP	FBgn0028394	CG17834	INTRON	0	A	G	G	0.3421	13	25	0.5475	1.16713e-06	-
25	6	2R_13380828_SNP	FBgn0050104	NT5E-2	DOWNSTREAM	154	T	C	C	0.3235	11	23	0.5924	2.83623e-07	(TF_binding_site|mE1_TFBS_bab1|FBsf0000214298);(TF_binding_site|mE1_TFBS_cnc|FBsf0000206389);(TF_binding_site|mE1_TFBS_HSA|FBsf0000357747)
25	6	2R_13380828_SNP	FBgn0050103	CG30103	UPSTREAM	372	T	C	C	0.3235	11	23	0.5924	2.83623e-07	(TF_binding_site|mE1_TFBS_bab1|FBsf0000214298);(TF_binding_site|mE1_TFBS_cnc|FBsf0000206389);(TF_binding_site|mE1_TFBS_HSA|FBsf0000357747)
25	6	2R_13380829_SNP	FBgn0050104	NT5E-2	DOWNSTREAM	155	A	G	G	0.3235	11	23	0.5924	2.83623e-07	(TF_binding_site|mE1_TFBS_bab1|FBsf0000214298);(TF_binding_site|mE1_TFBS_cnc|FBsf0000206389);(TF_binding_site|mE1_TFBS_HSA|FBsf0000357747)
25	6	2R_13380829_SNP	FBgn0050103	CG30103	UPSTREAM	371	A	G	G	0.3235	11	23	0.5924	2.83623e-07	(TF_binding_site|mE1_TFBS_bab1|FBsf0000214298);(TF_binding_site|mE1_TFBS_cnc|FBsf0000206389);(TF_binding_site|mE1_TFBS_HSA|FBsf0000357747)
25	6	3L_5135860_SNP	FBgn0035587	CG4623	INTRON	0	T	C	C	0.175	7	33	0.6509	1.9876e-06	-
25	7	2L_4045723_SNP	FBgn0000547	ed	INTRON	0	A	G	A	0.3	12	28	-0.4817	9.94284e-08	(TF_binding_site|BDTNP1_TFBS_da|FBsf0000321349);(TF_binding_site|BDTNP1_TFBS_dl|FBsf0000296543);(TF_binding_site|BDTNP1_TFBS_twi|FBsf0000200778);(TF_binding_site|mE1_TFBS_HSA|FBsf0000345163)
25	7	2R_9313418_SNP	FBgn0259221	CG42321	INTRON	0	G	A	G	0.3889	14	22	-0.4438	1.26691e-06	-
25	7	3L_1920416_SNP	FBgn0261723	Dbx	UPSTREAM	891	A	G	G	0.4	16	24	0.4388	2.847e-07	(TF_binding_site|BDTNP1_TFBS_dl|FBsf0000305127);(TF_binding_site|BDTNP1_TFBS_Med|FBsf0000281926);(TF_binding_site|BDTNP1_TFBS_twi|FBsf0000202737);(TF_binding_site|mE1_TFBS_HSA|FBsf0000361305);(TF_binding_site|mE1_TFBS_Trl|FBsf0000339382)
26	1	2L_12085332_SNP	FBgn0003145	prd	INTRON	0	C	T	C	0.275	11	29	2.032	9.17652e-07	(regulatory_region|REDfly_CRMs|FBsf0000435699);(regulatory_region|REDfly_CRMs|FBsf0000436604);(silencer|mE1_HDAC_PRE|FBsf0000343377);(TF_binding_site|BDTNP1_TFBS_da|FBsf0000322227);(TF_binding_site|BDTNP1_TFBS_dl|FBsf0000298235);(TF_binding_site|BDTNP1_TFBS_ftz|FBsf0000295106);(TF_binding_site|BDTNP1_TFBS_Med|FBsf0000278389);(TF_binding_site|BDTNP1_TFBS_prd|FBsf0000275016);(TF_binding_site|BDTNP1…
26	1	2L_12085332_SNP	FBgn0265803	CR44592	UPSTREAM	317	C	T	C	0.275	11	29	2.032	9.17652e-07	(regulatory_region|REDfly_CRMs|FBsf0000435699);(regulatory_region|REDfly_CRMs|FBsf0000436604);(silencer|mE1_HDAC_PRE|FBsf0000343377);(TF_binding_site|BDTNP1_TFBS_da|FBsf0000322227);(TF_binding_site|BDTNP1_TFBS_dl|FBsf0000298235);(TF_binding_site|BDTNP1_TFBS_ftz|FBsf0000295106);(TF_binding_site|BDTNP1_TFBS_Med|FBsf0000278389);(TF_binding_site|BDTNP1_TFBS_prd|FBsf0000275016);(TF_binding_site|BDTNP1…
26	1	2L_12085440_SNP	FBgn0003145	prd	INTRON	0	G	C	G	0.3684	14	24	-1.957	5.84524e-07	(regulatory_region|REDfly_CRMs|FBsf0000435699);(regulatory_region|REDfly_CRMs|FBsf0000436604);(silencer|mE1_HDAC_PRE|FBsf0000343377);(TF_binding_site|BDTNP1_TFBS_da|FBsf0000322227);(TF_binding_site|BDTNP1_TFBS_dl|FBsf0000298235);(TF_binding_site|BDTNP1_TFBS_ftz|FBsf0000295106);(TF_binding_site|BDTNP1_TFBS_Med|FBsf0000278389);(TF_binding_site|BDTNP1_TFBS_prd|FBsf0000275016);(TF_binding_site|BDTNP1…
26	1	2L_12085440_SNP	FBgn0265803	CR44592	UPSTREAM	209	G	C	G	0.3684	14	24	-1.957	5.84524e-07	(regulatory_region|REDfly_CRMs|FBsf0000435699);(regulatory_region|REDfly_CRMs|FBsf0000436604);(silencer|mE1_HDAC_PRE|FBsf0000343377);(TF_binding_site|BDTNP1_TFBS_da|FBsf0000322227);(TF_binding_site|BDTNP1_TFBS_dl|FBsf0000298235);(TF_binding_site|BDTNP1_TFBS_ftz|FBsf0000295106);(TF_binding_site|BDTNP1_TFBS_Med|FBsf0000278389);(TF_binding_site|BDTNP1_TFBS_prd|FBsf0000275016);(TF_binding_site|BDTNP1…
26	1	2L_16418674_SNP	FBgn0028523	CG5888	INTRON	0	A	C	C	0.1795	7	32	2.6	2.36908e-08	-
26	1	2L_16418674_SNP	FBgn0086037	snoRNA:Me28S-A2958	UPSTREAM	790	A	C	C	0.1795	7	32	2.6	2.36908e-08	-
26	1	2L_2276064_SNP	FBgn0264084	CR43753	EXON	0	A	G	G	0.1026	4	35	2.969	1.20443e-06	-
26	1	3L_14172890_SNP	Intergenic	Intergenic			A	C	C	0.1053	4	34	3.058	6.90668e-07	(regulatory_region|REDfly_CRMs|FBsf0000436532)
26	1	3L_14932161_SNP	FBgn0259099	DCX-EMAP	SYNONYMOUS_CODING	0	C	A	A	0.1053	4	34	2.939	1.77496e-06	-
26	1	3L_22566612_SNP	Intergenic	Intergenic			A	T	T	0.2051	8	31	2.278	6.19437e-07	(TF_binding_site|mE1_TFBS_cad|FBsf0000245660);(TF_binding_site|mE1_TFBS_chinmo|FBsf0000210599);(TF_binding_site|mE1_TFBS_HSA|FBsf0000367918)
26	1	3L_8346213_SNP	FBgn0035880	CG17352	SYNONYMOUS_CODING	0	A	G	G	0.175	7	33	2.427	3.55936e-07	(TF_binding_site|mE1_TFBS_cad|FBsf0000244489);(TF_binding_site|mE1_TFBS_chinmo|FBsf0000209962);(TF_binding_site|mE1_TFBS_HSA|FBsf0000363270)
26	1	3L_8346213_SNP	FBgn0035879	GAPcenA	DOWNSTREAM	834	A	G	G	0.175	7	33	2.427	3.55936e-07	(TF_binding_site|mE1_TFBS_cad|FBsf0000244489);(TF_binding_site|mE1_TFBS_chinmo|FBsf0000209962);(TF_binding_site|mE1_TFBS_HSA|FBsf0000363270)
26	1	3L_8346217_SNP	FBgn0035880	CG17352	SYNONYMOUS_CODING	0	C	G	G	0.175	7	33	2.427	3.55936e-07	(TF_binding_site|mE1_TFBS_cad|FBsf0000244489);(TF_binding_site|mE1_TFBS_chinmo|FBsf0000209962);(TF_binding_site|mE1_TFBS_HSA|FBsf0000363270)
26	1	3L_8346217_SNP	FBgn0035879	GAPcenA	DOWNSTREAM	838	C	G	G	0.175	7	33	2.427	3.55936e-07	(TF_binding_site|mE1_TFBS_cad|FBsf0000244489);(TF_binding_site|mE1_TFBS_chinmo|FBsf0000209962);(TF_binding_site|mE1_TFBS_HSA|FBsf0000363270)
26	1	3L_8658387_DEL	Intergenic	Intergenic			T	TT	TT	0.125	5	35	2.879	9.74371e-08	(regulatory_region|FlyBase|FBsf0000161350);(regulatory_region|FlyBase|FBsf0000161351);(regulatory_region|REDfly_CRMs|FBsf0000435580);(regulatory_region|REDfly_CRMs|FBsf0000435661);(TF_binding_site|BDTNP1_TFBS_dl|FBsf0000306313);(TF_binding_site|BDTNP1_TFBS_gt|FBsf0000293861);(TF_binding_site|BDTNP1_TFBS_hb|FBsf0000291263);(TF_binding_site|BDTNP1_TFBS_kni|FBsf0000289757);(TF_binding_site|BDTNP1_TF…
26	1	3L_8658421_DEL	Intergenic	Intergenic			G	GA	GA	0.125	5	35	2.879	9.74371e-08	(regulatory_region|FlyBase|FBsf0000161350);(regulatory_region|FlyBase|FBsf0000161351);(regulatory_region|REDfly_CRMs|FBsf0000435580);(regulatory_region|REDfly_CRMs|FBsf0000435661);(TF_binding_site|BDTNP1_TFBS_da|FBsf0000326413);(TF_binding_site|BDTNP1_TFBS_dl|FBsf0000306313);(TF_binding_site|BDTNP1_TFBS_gt|FBsf0000293861);(TF_binding_site|BDTNP1_TFBS_hb|FBsf0000291263);(TF_binding_site|BDTNP1_TFB…
26	1	3R_25641019_SNP	FBgn0039702	Vps16B	SYNONYMOUS_CODING	0	G	A	A	0.2895	11	27	2.006	1.08842e-06	(TF_binding_site|BDTNP1_TFBS_sna|FBsf0000271497);(TF_binding_site|mE1_TFBS_cad|FBsf0000249538);(TF_binding_site|mE1_TFBS_chinmo|FBsf0000213720);(TF_binding_site|mE1_TFBS_HSA|FBsf0000376481)
26	1	3R_25641019_SNP	FBgn0000247	ca	DOWNSTREAM	250	G	A	A	0.2895	11	27	2.006	1.08842e-06	(TF_binding_site|BDTNP1_TFBS_sna|FBsf0000271497);(TF_binding_site|mE1_TFBS_cad|FBsf0000249538);(TF_binding_site|mE1_TFBS_chinmo|FBsf0000213720);(TF_binding_site|mE1_TFBS_HSA|FBsf0000376481)
26	1	3R_25778128_SNP	FBgn0004622	TkR99D	INTRON	0	A	C	C	0.1538	6	33	2.502	1.50041e-06	(TF_binding_site|mE1_TFBS_chinmo|FBsf0000213736)
26	1	3R_4942672_INS	FBgn0003165	pum	INTRON	0	CACCCAACCTACCTT	C	C	0.1389	5	31	2.781	7.53975e-07	-
26	1	X_20325753_SNP	FBgn0052506	CG32506	INTRON	0	C	A	A	0.1026	4	35	2.956	1.40982e-06	(TF_binding_site|mE1_TFBS_chinmo|FBsf0000209351)
26	1	X_3574677_SNP	FBgn0023215	Mnt	INTRON	0	G	A	A	0.1795	7	32	2.34	1.78203e-06	(TF_binding_site|BDTNP1_TFBS_dl|FBsf0000316343);(TF_binding_site|mE1_TFBS_HSA|FBsf0000378899);(TF_binding_site|mE1_TFBS_Trl|FBsf0000342286)
26	1	X_3574993_SNP	FBgn0023215	Mnt	INTRON	0	T	A	A	0.1538	6	33	2.717	5.75162e-08	(TF_binding_site|BDTNP1_TFBS_dl|FBsf0000316343);(TF_binding_site|mE1_TFBS_HSA|FBsf0000378899);(TF_binding_site|mE1_TFBS_Trl|FBsf0000342286)
26	1	X_3577721_DEL	FBgn0023215	Mnt	INTRON	0	C	TTT	TTT	0.1622	6	31	2.53	1.7222e-06	(TF_binding_site|BDTNP1_TFBS_dl|FBsf0000316346)
26	1	X_3578113_SNP	FBgn0023215	Mnt	INTRON	0	A	G	G	0.1842	7	31	2.437	5.28925e-07	(TF_binding_site|BDTNP1_TFBS_dl|FBsf0000316346);(TF_binding_site|mE1_TFBS_HSA|FBsf0000378902)
26	1	X_3578118_SNP	FBgn0023215	Mnt	INTRON	0	C	A	A	0.1622	6	31	2.557	7.44476e-07	(TF_binding_site|BDTNP1_TFBS_dl|FBsf0000316346);(TF_binding_site|mE1_TFBS_HSA|FBsf0000378902)
26	2	3L_12845668_SNP	FBgn0036318	Wbp2	DOWNSTREAM	514	G	A	A	0.2308	9	30	1.238	4.3001e-07	-
26	2	3L_9229373_SNP	FBgn0035970	CG4483	NON_SYNONYMOUS_CODING	0	T	C	T	0.2564	10	29	1.208	2.83964e-07	-
26	2	3R_13776639_SNP	FBgn0263995	cpo	INTRON	0	A	T	T	0.3889	14	22	-1.19	9.75413e-08	(TF_binding_site|BDTNP1_TFBS_dl|FBsf0000312523);(TF_binding_site|BDTNP1_TFBS_twi|FBsf0000265358);(TF_binding_site|mE1_TFBS_HSA|FBsf0000372737);(TF_binding_site|mE1_TFBS_Trl|FBsf0000341292)
26	2	3R_8368965_SNP	FBgn0250910	Octbeta3R	INTRON	0	T	C	T	0.4865	18	19	-1.046	1.84077e-06	-
26	2	3R_8368969_SNP	FBgn0250910	Octbeta3R	INTRON	0	C	A	C	0.4865	18	19	-1.046	1.84077e-06	-
26	3	2L_16447603_SNP	FBgn0020415	Idgf2	INTRON	0	C	T	T	0.2564	10	29	-1.018	8.67127e-07	-
26	3	2L_16447603_SNP	FBgn0028523	CG5888	INTRON	0	C	T	T	0.2564	10	29	-1.018	8.67127e-07	-
26	3	2L_16447603_SNP	FBgn0020416	Idgf1	DOWNSTREAM	810	C	T	T	0.2564	10	29	-1.018	8.67127e-07	-
26	3	3R_10456009_SNP	FBgn0038248	CG7886	INTRON	0	C	G	G	0.2	8	32	1.067	2.04114e-06	(TF_binding_site|BDTNP1_TFBS_dl|FBsf0000311717);(TF_binding_site|BDTNP1_TFBS_sna|FBsf0000271004);(TF_binding_site|BDTNP1_TFBS_twi|FBsf0000265002);(TF_binding_site|mE1_TFBS_HSA|FBsf0000371604);(TF_binding_site|mE1_TFBS_sens|FBsf0000231727)
26	3	3R_10456009_SNP	FBgn0038247	Cad88C	UPSTREAM	191	C	G	G	0.2	8	32	1.067	2.04114e-06	(TF_binding_site|BDTNP1_TFBS_dl|FBsf0000311717);(TF_binding_site|BDTNP1_TFBS_sna|FBsf0000271004);(TF_binding_site|BDTNP1_TFBS_twi|FBsf0000265002);(TF_binding_site|mE1_TFBS_HSA|FBsf0000371604);(TF_binding_site|mE1_TFBS_sens|FBsf0000231727)
26	4	2L_6768342_SNP	FBgn0031857	CG11321	SYNONYMOUS_CODING	0	T	C	C	0.1053	4	34	1.317	1.80423e-06	(TF_binding_site|mE1_TFBS_chinmo|FBsf0000207399);(TF_binding_site|mE1_TFBS_HSA|FBsf0000346186)
26	4	2R_11595226_SNP	Intergenic	Intergenic			A	T	T	0.1026	4	35	1.321	1.49322e-06	-
26	4	2R_14716052_SNP	FBgn0034396	CG15097	INTRON	0	G	C	C	0.125	5	35	1.237	3.55602e-07	-
26	4	2R_4079326_SNP	FBgn0053087	LRP1	INTRON	0	T	A	A	0.125	5	35	1.22	8.10758e-07	-
26	4	3L_13194121_SNP	Intergenic	Intergenic			G	A	A	0.125	5	35	1.186	2.07717e-06	(TF_binding_site|BDTNP1_TFBS_prd|FBsf0000275568)
26	4	3L_18379080_DEL	Intergenic	Intergenic			T	TAT	TAT	0.1622	6	31	1.114	1.97866e-06	-
26	4	3L_2565481_SNP	FBgn0010909	msn	INTRON	0	C	G	C	0.1282	5	34	1.186	1.65692e-06	-
26	4	3L_5969788_SNP	FBgn0035656	CG10479	UPSTREAM	681	T	C	C	0.1	4	36	1.306	1.9462e-06	(TF_binding_site|BDTNP1_TFBS_da|FBsf0000326198);(TF_binding_site|BDTNP1_TFBS_dl|FBsf0000305847);(TF_binding_site|BDTNP1_TFBS_Med|FBsf0000282296);(TF_binding_site|BDTNP1_TFBS_prd|FBsf0000275402);(TF_binding_site|BDTNP1_TFBS_twi|FBsf0000203041);(TF_binding_site|BDTNP1_TFBS_z|FBsf0000197014);(TF_binding_site|mE1_TFBS_D|FBsf0000239149);(TF_binding_site|mE1_TFBS_HSA|FBsf0000362542);(TF_binding_site|mE…
26	4	3L_6058847_SNP	FBgn0259164	CG42269	UPSTREAM	549	A	G	G	0.125	5	35	1.217	9.19735e-07	-
26	4	3R_15248998_SNP	FBgn0051221	CG31221	INTRON	0	C	A	C	0.2162	8	29	1.004	1.28381e-06	-
26	4	3R_15248998_SNP	FBgn0038706	CG3517	DOWNSTREAM	503	C	A	C	0.2162	8	29	1.004	1.28381e-06	-
26	4	3R_18168606_DEL	FBgn0038945	CG5386	UPSTREAM	634	C	CT	CT	0.1538	6	33	1.128	8.16206e-07	(TF_binding_site|mE1_TFBS_bab1|FBsf0000214802);(TF_binding_site|mE1_TFBS_cad|FBsf0000249002);(TF_binding_site|mE1_TFBS_HSA|FBsf0000374091)
26	4	3R_8610586_SNP	Intergenic	Intergenic			G	C	C	0.1111	4	32	1.325	1.48504e-06	-
26	4	3R_9985696_SNP	FBgn0051327	CG31327	NON_SYNONYMOUS_CODING	0	A	G	G	0.1	4	36	1.325	1.3391e-06	-
26	4	X_16880550_SNP	FBgn0266354	CG45002	INTRON	0	C	T	T	0.1176	4	30	1.365	5.74885e-07	-
26	4	X_16880552_SNP	FBgn0266354	CG45002	INTRON	0	T	A	A	0.1143	4	31	1.356	6.76822e-07	-
26	6	2L_2470069_SNP	Intergenic	Intergenic			T	C	C	0.4103	16	23	0.6098	6.45493e-07	(enhancer|FlyBase|FBsf0000161152);(regulatory_region|REDfly_CRMs|FBsf0000436396)
26	6	2R_17155889_SNP	FBgn0085426	Rgk3	INTRON	0	A	G	G	0.1795	7	32	-0.8077	8.88358e-07	-
26	6	2R_17155889_SNP	FBgn0050393	CG30393	UPSTREAM	805	A	G	G	0.1795	7	32	-0.8077	8.88358e-07	-
26	6	3R_16205331_SNP	FBgn0262869	Gfrl	UTR_3_PRIME	0	G	T	G	0.1944	7	29	-0.8183	7.74538e-07	-
26	6	3R_25138178_SNP	Intergenic	Intergenic			T	A	T	0.3514	13	24	0.6498	2.09612e-06	(TF_binding_site|mE1_TFBS_bab1|FBsf0000214860);(TF_binding_site|mE1_TFBS_hkb|FBsf0000255871);(TF_binding_site|mE1_TFBS_sens|FBsf0000234045)
26	7	2L_10259719_SNP	FBgn0026379	Pten	INTRON	0	G	A	A	0.4054	15	22	0.6467	4.01067e-07	(TF_binding_site|BDTNP1_TFBS_dl|FBsf0000297874);(TF_binding_site|BDTNP1_TFBS_Med|FBsf0000278207);(TF_binding_site|BDTNP1_TFBS_twi|FBsf0000201399);(TF_binding_site|mE1_TFBS_kn|FBsf0000336214);(TF_binding_site|mE1_TFBS_Kr|FBsf0000253241)
26	7	2L_7523808_SNP	FBgn0264895	RapGAP1	INTRON	0	G	C	C	0.3846	15	24	-0.6055	1.28338e-06	-
26	7	2R_15392961_SNP	FBgn0265665	CR44472	EXON	0	A	T	T	0.4211	16	22	-0.6289	2.7904e-07	(TF_binding_site|BDTNP1_TFBS_dl|FBsf0000303260)
26	7	2R_15392961_SNP	FBgn0034455	CG11007	DOWNSTREAM	862	A	T	T	0.4211	16	22	-0.6289	2.7904e-07	(TF_binding_site|BDTNP1_TFBS_dl|FBsf0000303260)
26	7	2R_15392961_SNP	FBgn0050223	tRNA:H:56E	DOWNSTREAM	883	A	T	T	0.4211	16	22	-0.6289	2.7904e-07	(TF_binding_site|BDTNP1_TFBS_dl|FBsf0000303260)
26	9	2L_11376677_SNP	Intergenic	Intergenic			T	A	A	0.125	5	35	0.7281	9.23755e-07	(regulatory_region|REDfly_CRMs|FBsf0000436441)
26	9	2L_11376851_SNP	Intergenic	Intergenic			A	G	G	0.125	5	35	0.7281	9.23755e-07	(regulatory_region|REDfly_CRMs|FBsf0000436441)
26	9	2L_11377506_SNP	Intergenic	Intergenic			G	C	C	0.1579	6	32	0.6869	8.32742e-07	(regulatory_region|REDfly_CRMs|FBsf0000436441)
26	9	2L_11377704_SNP	Intergenic	Intergenic			T	A	A	0.225	9	31	0.592	4.4315e-07	(regulatory_region|REDfly_CRMs|FBsf0000436441)
26	9	2L_16606407_SNP	FBgn0051815	CG31815	NON_SYNONYMOUS_CODING	0	T	G	G	0.1282	5	34	0.7283	1.02426e-06	-
26	9	2L_16606407_SNP	FBgn0259735	CG42389	INTRON	0	T	G	G	0.1282	5	34	0.7283	1.02426e-06	-
26	9	2L_16606407_SNP	FBgn0032590	CG4631	UPSTREAM	963	T	G	G	0.1282	5	34	0.7283	1.02426e-06	-
26	9	2L_18218335_SNP	FBgn0261804	CG42750	INTRON	0	T	C	C	0.1429	5	30	0.7469	6.136e-07	-
26	9	2L_18884093_SNP	Intergenic	Intergenic			C	A	A	0.2051	8	31	0.6019	1.04029e-06	(TF_binding_site|mE1_TFBS_HSA|FBsf0000352285)
26	9	2R_16606079_INS	FBgn0040726	dpr	INTRON	0	CC	C	C	0.1	4	36	0.8432	1.4326e-07	-
26	9	3L_15645426_SNP	FBgn0004590	Eig71Ec	UPSTREAM	72	G	C	C	0.1282	5	34	0.7272	1.00992e-06	-
26	9	3L_15645426_SNP	FBgn0004591	Eig71Ed	UPSTREAM	211	G	C	C	0.1282	5	34	0.7272	1.00992e-06	-
26	9	3L_15645426_SNP	FBgn0262530	CG43084	DOWNSTREAM	934	G	C	C	0.1282	5	34	0.7272	1.00992e-06	-
26	9	3L_8155614_SNP	FBgn0035845	CG13675	INTRON	0	A	G	G	0.125	5	35	0.7376	5.79553e-07	-
26	9	3R_10437715_SNP	FBgn0038246	CG14853	INTRON	0	C	G	G	0.1842	7	31	0.6304	1.65254e-06	-
26	9	X_14042450_SNP	Intergenic	Intergenic			T	C	C	0.1282	5	34	0.746	4.38562e-07	-
26	9	X_14042455_SNP	Intergenic	Intergenic			T	C	C	0.1282	5	34	0.746	4.38562e-07	-
26	9	X_14706717_SNP	FBgn0003301	rut	INTRON	0	A	T	T	0.1026	4	35	0.7943	1.39659e-06	-
26	9	X_6153600_DEL	FBgn0040918	schlank	INTRON	0	T	TCCGGGCAGGCAT	TCCGGGCAGGCAT	0.1053	4	34	0.803	1.01121e-06	(TF_binding_site|mE1_TFBS_sens|FBsf0000219806)
27	1	2R_14360833_SNP	FBgn0028496	CG30116	INTRON	0	C	G	C	0.3158	12	26	-1.349	9.29753e-07	-
27	1	3L_20369699_SNP	FBgn0036980	RhoBTB	SPLICE_SITE_REGION	0	A	G	G	0.2895	11	27	1.311	1.11284e-06	(TF_binding_site|BDTNP1_TFBS_dl|FBsf0000308758);(TF_binding_site|BDTNP1_TFBS_Med|FBsf0000283749);(TF_binding_site|BDTNP1_TFBS_twi|FBsf0000204354);(TF_binding_site|mE1_TFBS_HSA|FBsf0000367143);(TF_binding_site|mE1_TFBS_sens|FBsf0000225398);(TF_binding_site|mE1_TFBS_ttk|FBsf0000335504)
27	1	3L_20369699_SNP	FBgn0001247	Ide	UPSTREAM	703	A	G	G	0.2895	11	27	1.311	1.11284e-06	(TF_binding_site|BDTNP1_TFBS_dl|FBsf0000308758);(TF_binding_site|BDTNP1_TFBS_Med|FBsf0000283749);(TF_binding_site|BDTNP1_TFBS_twi|FBsf0000204354);(TF_binding_site|mE1_TFBS_HSA|FBsf0000367143);(TF_binding_site|mE1_TFBS_sens|FBsf0000225398);(TF_binding_site|mE1_TFBS_ttk|FBsf0000335504)
27	2	2L_3439287_SNP	Intergenic	Intergenic			C	A	A	0.2051	8	31	0.9818	1.77567e-06	-
27	2	2L_3439289_SNP	Intergenic	Intergenic			T	C	C	0.2051	8	31	0.9818	1.77567e-06	-
27	3	2L_5240876_SNP	FBgn0003716	tkv	INTRON	0	T	A	A	0.4872	19	20	-0.6693	1.78188e-06	(TF_binding_site|BDTNP1_TFBS_dl|FBsf0000296763);(TF_binding_site|BDTNP1_TFBS_twi|FBsf0000200881)
27	3	2L_5240876_SNP	FBgn0051971	tRNA:CR31971	DOWNSTREAM	39	T	A	A	0.4872	19	20	-0.6693	1.78188e-06	(TF_binding_site|BDTNP1_TFBS_dl|FBsf0000296763);(TF_binding_site|BDTNP1_TFBS_twi|FBsf0000200881)
27	3	2L_5240876_SNP	FBgn0051914	tRNA:CR31914	DOWNSTREAM	230	T	A	A	0.4872	19	20	-0.6693	1.78188e-06	(TF_binding_site|BDTNP1_TFBS_dl|FBsf0000296763);(TF_binding_site|BDTNP1_TFBS_twi|FBsf0000200881)
27	3	2L_6454032_SNP	FBgn0031814	retm	INTRON	0	T	G	G	0.2564	10	29	-0.8021	1.34906e-06	(TF_binding_site|mE1_TFBS_HSA|FBsf0000346062);(TF_binding_site|mE1_TFBS_zfh1|FBsf0000334479)
27	3	2L_6454076_SNP	FBgn0031814	retm	INTRON	0	T	G	G	0.2564	10	29	-0.8021	1.34906e-06	(TF_binding_site|mE1_TFBS_zfh1|FBsf0000334479)
27	3	3L_2572833_SNP	FBgn0010909	msn	INTRON	0	G	T	T	0.3333	12	24	0.7951	5.01809e-07	-
27	4	2L_10130472_SNP	FBgn0265002	CG44153	INTRON	0	G	C	C	0.4103	16	23	-0.5906	7.25691e-07	-
27	4	2L_5774605_SNP	FBgn0031738	CG9171	INTRON	0	C	G	C	0.3158	12	26	-0.616	1.70612e-06	(TF_binding_site|BDTNP1_TFBS_twi|FBsf0000200943);(TF_binding_site|mE1_TFBS_cad|FBsf0000241459);(TF_binding_site|mE1_TFBS_HSA|FBsf0000345794)
27	4	2L_9252837_SNP	FBgn0032105	borr	SYNONYMOUS_CODING	0	A	G	G	0.225	9	31	-0.6762	1.17137e-06	(TF_binding_site|BDTNP1_TFBS_da|FBsf0000322025);(TF_binding_site|BDTNP1_TFBS_dl|FBsf0000297681);(TF_binding_site|BDTNP1_TFBS_Med|FBsf0000278102);(TF_binding_site|BDTNP1_TFBS_twi|FBsf0000201314);(TF_binding_site|mE1_TFBS_HSA|FBsf0000347028)
27	5	2R_12623569_DEL	FBgn0262564	CG43104	DOWNSTREAM	748	A	AC	AC	0.4211	16	22	0.4373	1.78136e-06	-
28	1	2L_14084333_SNP	FBgn0028875	nAChRalpha5	INTRON	0	G	A	A	0.1111	4	32	-2.145	1.7994e-06	-
28	1	2L_14759300_SNP	Intergenic	Intergenic			G	A	A	0.1026	4	35	-2.16	1.92084e-06	-
28	1	2L_14881322_SNP	FBgn0013300	Mst35Ba	INTRON	0	G	A	A	0.1026	4	35	-2.13	2.10231e-06	-
28	1	2L_14881322_SNP	FBgn0013301	Mst35Bb	DOWNSTREAM	779	G	A	A	0.1026	4	35	-2.13	2.10231e-06	-
28	1	2L_14881329_INS	FBgn0013300	Mst35Ba	INTRON	0	TT	T	T	0.1026	4	35	-2.13	2.10231e-06	-
28	1	2L_14881329_INS	FBgn0013301	Mst35Bb	DOWNSTREAM	771	TT	T	T	0.1026	4	35	-2.13	2.10231e-06	-
28	1	2L_14896990_SNP	Intergenic	Intergenic			A	C	C	0.1	4	36	-2.158	1.93397e-06	-
28	1	2L_14897011_SNP	Intergenic	Intergenic			A	G	G	0.1	4	36	-2.158	1.93397e-06	-
28	1	2L_14897017_SNP	Intergenic	Intergenic			C	T	T	0.1	4	36	-2.158	1.93397e-06	-
28	1	2L_16012166_DEL	FBgn0028644	beat-Ic	INTRON	0	C	CAGCCAAAAACTCCATTAAACAA	CAGCCAAAAACTCCATTAAACAA	0.1	4	36	-2.279	2.39253e-07	-
28	1	2L_16012201_SNP	FBgn0028644	beat-Ic	INTRON	0	T	C	C	0.1	4	36	-2.279	2.39253e-07	-
28	1	2L_16012203_DEL	FBgn0028644	beat-Ic	INTRON	0	A	CG	CG	0.1	4	36	-2.279	2.39253e-07	-
28	1	2L_1625979_SNP	FBgn0265814	CR44603	EXON	0	C	G	G	0.1026	4	35	-2.157	2.11079e-06	-
28	1	2L_16414918_SNP	FBgn0028523	CG5888	INTRON	0	C	T	C	0.1	4	36	-2.158	1.93397e-06	(TF_binding_site|BDTNP1_TFBS_dl|FBsf0000298941);(TF_binding_site|BDTNP1_TFBS_twi|FBsf0000201885);(TF_binding_site|mE1_TFBS_cad|FBsf0000242234);(TF_binding_site|mE1_TFBS_HSA|FBsf0000351614)
28	1	2L_2447584_SNP	FBgn0000490	dpp	INTRON	0	A	G	G	0.1	4	36	-2.196	6.66443e-07	(enhancer|FlyBase|FBsf0000161142);(regulatory_region|REDfly_CRMs|FBsf0000436149);(TF_binding_site|BDTNP1_TFBS_da|FBsf0000321163);(TF_binding_site|BDTNP1_TFBS_dl|FBsf0000296212);(TF_binding_site|BDTNP1_TFBS_Med|FBsf0000277286);(TF_binding_site|BDTNP1_TFBS_prd|FBsf0000274749);(TF_binding_site|BDTNP1_TFBS_slp1|FBsf0000271610);(TF_binding_site|BDTNP1_TFBS_twi|FBsf0000200642)
28	1	2L_3527510_SNP	FBgn0031548	CG8852	UTR_3_PRIME	0	A	T	T	0.1026	4	35	-2.186	1.24591e-06	-
28	1	2L_3527510_SNP	FBgn0031549	Spindly	UTR_3_PRIME	0	A	T	T	0.1026	4	35	-2.186	1.24591e-06	-
28	1	2L_3527580_SNP	FBgn0031549	Spindly	SYNONYMOUS_CODING	0	A	C	C	0.1026	4	35	-2.328	6.93265e-08	(TF_binding_site|mE1_TFBS_HSA|FBsf0000344988);(TF_binding_site|mE1_TFBS_sens|FBsf0000215829)
28	1	2L_3527580_SNP	FBgn0031548	CG8852	UTR_3_PRIME	0	A	C	C	0.1026	4	35	-2.328	6.93265e-08	(TF_binding_site|mE1_TFBS_HSA|FBsf0000344988);(TF_binding_site|mE1_TFBS_sens|FBsf0000215829)
28	1	2L_3527649_SNP	FBgn0031549	Spindly	SYNONYMOUS_CODING	0	T	C	C	0.125	5	35	-1.935	1.88298e-06	(TF_binding_site|mE1_TFBS_HSA|FBsf0000344988);(TF_binding_site|mE1_TFBS_sens|FBsf0000215829)
28	1	2L_3527649_SNP	FBgn0031548	CG8852	DOWNSTREAM	61	T	C	C	0.125	5	35	-1.935	1.88298e-06	(TF_binding_site|mE1_TFBS_HSA|FBsf0000344988);(TF_binding_site|mE1_TFBS_sens|FBsf0000215829)
28	1	2L_3527706_SNP	FBgn0031549	Spindly	SYNONYMOUS_CODING	0	T	C	C	0.125	5	35	-1.935	1.88298e-06	(TF_binding_site|mE1_TFBS_HSA|FBsf0000344988);(TF_binding_site|mE1_TFBS_sens|FBsf0000215829)
28	1	2L_3527706_SNP	FBgn0031548	CG8852	DOWNSTREAM	118	T	C	C	0.125	5	35	-1.935	1.88298e-06	(TF_binding_site|mE1_TFBS_HSA|FBsf0000344988);(TF_binding_site|mE1_TFBS_sens|FBsf0000215829)
28	1	2L_3527730_SNP	FBgn0031549	Spindly	SYNONYMOUS_CODING	0	T	C	C	0.125	5	35	-1.935	1.88298e-06	(TF_binding_site|mE1_TFBS_HSA|FBsf0000344988);(TF_binding_site|mE1_TFBS_sens|FBsf0000215829)
28	1	2L_3527730_SNP	FBgn0031548	CG8852	DOWNSTREAM	142	T	C	C	0.125	5	35	-1.935	1.88298e-06	(TF_binding_site|mE1_TFBS_HSA|FBsf0000344988);(TF_binding_site|mE1_TFBS_sens|FBsf0000215829)
28	1	2L_3527844_SNP	FBgn0031549	Spindly	SYNONYMOUS_CODING	0	G	A	A	0.1282	5	34	-1.94	1.83459e-06	(TF_binding_site|mE1_TFBS_HSA|FBsf0000344988);(TF_binding_site|mE1_TFBS_sens|FBsf0000215829)
28	1	2L_3527844_SNP	FBgn0031548	CG8852	DOWNSTREAM	256	G	A	A	0.1282	5	34	-1.94	1.83459e-06	(TF_binding_site|mE1_TFBS_HSA|FBsf0000344988);(TF_binding_site|mE1_TFBS_sens|FBsf0000215829)
28	1	2L_3527997_SNP	FBgn0031549	Spindly	SYNONYMOUS_CODING	0	T	G	G	0.125	5	35	-1.935	1.88298e-06	-
28	1	2L_3527997_SNP	FBgn0031548	CG8852	DOWNSTREAM	409	T	G	G	0.125	5	35	-1.935	1.88298e-06	-
28	1	2L_3529590_SNP	FBgn0031549	Spindly	SYNONYMOUS_CODING	0	C	T	C	0.1	4	36	-2.318	7.90504e-08	(TF_binding_site|BDTNP1_TFBS_dl|FBsf0000296412);(TF_binding_site|mE1_TFBS_sens|FBsf0000215830)
28	1	2L_3529739_SNP	FBgn0031549	Spindly	INTRON	0	A	G	G	0.1	4	36	-2.318	7.90504e-08	(TF_binding_site|BDTNP1_TFBS_dl|FBsf0000296412);(TF_binding_site|BDTNP1_TFBS_hb|FBsf0000290531);(TF_binding_site|mE1_TFBS_sens|FBsf0000215830)
28	1	2L_3530368_DEL	FBgn0031549	Spindly	UPSTREAM	52	T	TTGCTCGCATTGT	TTGCTCGCATTGT	0.1053	4	34	-2.302	1.21431e-07	(TF_binding_site|BDTNP1_TFBS_dl|FBsf0000296412);(TF_binding_site|BDTNP1_TFBS_hb|FBsf0000290531);(TF_binding_site|mE1_TFBS_h|FBsf0000256302);(TF_binding_site|mE1_TFBS_HSA|FBsf0000344989);(TF_binding_site|mE1_TFBS_zfh1|FBsf0000334463)
28	1	2L_3530368_DEL	FBgn0031550	Che-13	UPSTREAM	420	T	TTGCTCGCATTGT	TTGCTCGCATTGT	0.1053	4	34	-2.302	1.21431e-07	(TF_binding_site|BDTNP1_TFBS_dl|FBsf0000296412);(TF_binding_site|BDTNP1_TFBS_hb|FBsf0000290531);(TF_binding_site|mE1_TFBS_h|FBsf0000256302);(TF_binding_site|mE1_TFBS_HSA|FBsf0000344989);(TF_binding_site|mE1_TFBS_zfh1|FBsf0000334463)
28	1	2L_3530498_SNP	FBgn0031549	Spindly	UPSTREAM	181	C	A	A	0.1026	4	35	-2.324	7.53713e-08	(TF_binding_site|BDTNP1_TFBS_dl|FBsf0000296412);(TF_binding_site|BDTNP1_TFBS_hb|FBsf0000290531);(TF_binding_site|mE1_TFBS_h|FBsf0000256302);(TF_binding_site|mE1_TFBS_HSA|FBsf0000344989);(TF_binding_site|mE1_TFBS_zfh1|FBsf0000334463)
28	1	2L_3530498_SNP	FBgn0031550	Che-13	UPSTREAM	291	C	A	A	0.1026	4	35	-2.324	7.53713e-08	(TF_binding_site|BDTNP1_TFBS_dl|FBsf0000296412);(TF_binding_site|BDTNP1_TFBS_hb|FBsf0000290531);(TF_binding_site|mE1_TFBS_h|FBsf0000256302);(TF_binding_site|mE1_TFBS_HSA|FBsf0000344989);(TF_binding_site|mE1_TFBS_zfh1|FBsf0000334463)
28	1	2L_3530515_SNP	FBgn0031549	Spindly	UPSTREAM	198	G	A	A	0.1	4	36	-2.318	7.90504e-08	(TF_binding_site|BDTNP1_TFBS_dl|FBsf0000296412);(TF_binding_site|BDTNP1_TFBS_hb|FBsf0000290531);(TF_binding_site|mE1_TFBS_h|FBsf0000256302);(TF_binding_site|mE1_TFBS_HSA|FBsf0000344989);(TF_binding_site|mE1_TFBS_zfh1|FBsf0000334463)
28	1	2L_3530515_SNP	FBgn0031550	Che-13	UPSTREAM	274	G	A	A	0.1	4	36	-2.318	7.90504e-08	(TF_binding_site|BDTNP1_TFBS_dl|FBsf0000296412);(TF_binding_site|BDTNP1_TFBS_hb|FBsf0000290531);(TF_binding_site|mE1_TFBS_h|FBsf0000256302);(TF_binding_site|mE1_TFBS_HSA|FBsf0000344989);(TF_binding_site|mE1_TFBS_zfh1|FBsf0000334463)
28	1	2L_3530877_SNP	FBgn0031550	Che-13	UTR_5_PRIME	0	A	G	G	0.1	4	36	-2.318	7.90504e-08	(TF_binding_site|BDTNP1_TFBS_dl|FBsf0000296413);(TF_binding_site|BDTNP1_TFBS_hb|FBsf0000290532);(TF_binding_site|mE1_TFBS_HSA|FBsf0000344989);(TF_binding_site|mE1_TFBS_zfh1|FBsf0000334463)
28	1	2L_3530877_SNP	FBgn0031549	Spindly	UPSTREAM	560	A	G	G	0.1	4	36	-2.318	7.90504e-08	(TF_binding_site|BDTNP1_TFBS_dl|FBsf0000296413);(TF_binding_site|BDTNP1_TFBS_hb|FBsf0000290532);(TF_binding_site|mE1_TFBS_HSA|FBsf0000344989);(TF_binding_site|mE1_TFBS_zfh1|FBsf0000334463)
28	1	2L_3531022_SNP	FBgn0031550	Che-13	SYNONYMOUS_CODING	0	G	A	A	0.1	4	36	-2.318	7.90504e-08	(TF_binding_site|BDTNP1_TFBS_dl|FBsf0000296413)
28	1	2L_3531022_SNP	FBgn0031549	Spindly	UPSTREAM	705	G	A	A	0.1	4	36	-2.318	7.90504e-08	(TF_binding_site|BDTNP1_TFBS_dl|FBsf0000296413)
28	1	2L_3531221_SNP	FBgn0031550	Che-13	INTRON	0	A	T	T	0.1	4	36	-2.318	7.90504e-08	-
28	1	2L_3531221_SNP	FBgn0031549	Spindly	UPSTREAM	904	A	T	T	0.1	4	36	-2.318	7.90504e-08	-
28	1	2L_3531310_SNP	FBgn0031550	Che-13	SYNONYMOUS_CODING	0	T	C	C	0.1282	5	34	-1.981	1.16214e-06	-
28	1	2L_3531310_SNP	FBgn0031549	Spindly	UPSTREAM	993	T	C	C	0.1282	5	34	-1.981	1.16214e-06	-
28	1	2L_3531316_SNP	FBgn0031550	Che-13	SYNONYMOUS_CODING	0	C	G	G	0.1111	4	32	-2.298	1.50632e-07	-
28	1	2L_3531316_SNP	FBgn0031549	Spindly	UPSTREAM	999	C	G	G	0.1111	4	32	-2.298	1.50632e-07	-
28	1	2L_3532403_SNP	FBgn0031550	Che-13	SYNONYMOUS_CODING	0	G	A	A	0.1	4	36	-2.318	7.90504e-08	(TF_binding_site|BDTNP1_TFBS_da|FBsf0000321255);(TF_binding_site|BDTNP1_TFBS_dl|FBsf0000296414);(TF_binding_site|BDTNP1_TFBS_Med|FBsf0000277402);(TF_binding_site|BDTNP1_TFBS_slp1|FBsf0000271625);(TF_binding_site|BDTNP1_TFBS_twi|FBsf0000200714);(TF_binding_site|mE1_TFBS_cad|FBsf0000241257);(TF_binding_site|mE1_TFBS_sens|FBsf0000215831)
28	1	2L_3532632_SNP	FBgn0031550	Che-13	UTR_3_PRIME	0	T	G	G	0.1	4	36	-2.318	7.90504e-08	(TF_binding_site|BDTNP1_TFBS_da|FBsf0000321255);(TF_binding_site|BDTNP1_TFBS_dl|FBsf0000296414);(TF_binding_site|BDTNP1_TFBS_Med|FBsf0000277402);(TF_binding_site|BDTNP1_TFBS_slp1|FBsf0000271625);(TF_binding_site|BDTNP1_TFBS_twi|FBsf0000200714);(TF_binding_site|mE1_TFBS_cad|FBsf0000241257)
28	1	2L_902096_SNP	FBgn0003916	snRNA:U1:21D	UPSTREAM	442	T	G	G	0.1	4	36	-2.139	1.68882e-06	(TF_binding_site|BDTNP1_TFBS_dl|FBsf0000295936);(TF_binding_site|BDTNP1_TFBS_Med|FBsf0000277155);(TF_binding_site|mE1_TFBS_HSA|FBsf0000344214)
28	1	2L_902096_SNP	FBgn0002563	Lsp1beta	DOWNSTREAM	780	T	G	G	0.1	4	36	-2.139	1.68882e-06	(TF_binding_site|BDTNP1_TFBS_dl|FBsf0000295936);(TF_binding_site|BDTNP1_TFBS_Med|FBsf0000277155);(TF_binding_site|mE1_TFBS_HSA|FBsf0000344214)
28	1	2L_921476_SNP	Intergenic	Intergenic			T	C	C	0.1026	4	35	-2.192	1.10473e-06	-
28	1	2L_922548_SNP	FBgn0028481	CG4341	UPSTREAM	245	G	T	T	0.1	4	36	-2.139	1.68882e-06	-
28	1	2L_9854981_SNP	FBgn0032151	nAChRalpha6	INTRON	0	A	G	G	0.1176	4	30	-2.179	1.13452e-06	-
28	1	2R_10811750_INS	FBgn0027596	CG10249	INTRON	0	T	TGTT	T	0.1053	4	34	-2.246	4.56587e-07	-
28	1	2R_12053878_SNP	FBgn0034083	lbk	SYNONYMOUS_CODING	0	A	C	C	0.1026	4	35	-2.221	6.34934e-07	(TF_binding_site|mE1_TFBS_cad|FBsf0000246785)
28	1	2R_12334295_SNP	FBgn0034129	CG15925	SYNONYMOUS_CODING	0	G	A	A	0.1	4	36	-2.16	1.88283e-06	-
28	1	2R_1385781_SNP	FBgn0050438	CG30438	INTRON	0	G	A	A	0.1389	5	31	-1.977	1.10151e-06	(transposable_element|FlyBase|FBti0062320)
28	1	2R_1501145_SNP	Intergenic	Intergenic			C	T	T	0.1053	4	34	-2.122	2.01536e-06	(transposable_element|FlyBase|FBti0061437)
28	1	2R_19817713_SNP	FBgn0263006	Ca-P60A	SYNONYMOUS_CODING	0	A	G	G	0.1	4	36	-2.139	1.68882e-06	(TF_binding_site|mE1_TFBS_cad|FBsf0000247398);(TF_binding_site|mE1_TFBS_HSA|FBsf0000359984)
28	1	2R_7651996_SNP	FBgn0033652	ths	INTRON	0	T	C	C	0.1026	4	35	-2.397	1.41474e-08	-
28	1	2R_7656467_SNP	FBgn0033650	CG13193	INTRON	0	C	T	T	0.1316	5	33	-2.003	6.35622e-07	(TF_binding_site|mE1_TFBS_cad|FBsf0000246389)
28	1	2R_7656467_SNP	FBgn0033652	ths	INTRON	0	C	T	T	0.1316	5	33	-2.003	6.35622e-07	(TF_binding_site|mE1_TFBS_cad|FBsf0000246389)
28	1	2R_8532256_SNP	FBgn0033760	CG8785	INTRON	0	T	C	C	0.1081	4	33	-2.223	5.70498e-07	(TF_binding_site|mE1_TFBS_cad|FBsf0000246477)
28	1	3L_10779064_DEL	FBgn0265737	CR44544	DOWNSTREAM	605	C	CGAA	CGAA	0.1	4	36	-2.279	2.39253e-07	-
28	1	3L_15051446_SNP	FBgn0261090	Sytbeta	INTRON	0	G	T	T	0.1143	4	31	-2.166	1.38986e-06	-
28	1	3L_15216547_SNP	Intergenic	Intergenic			C	G	G	0.1282	5	34	-2.092	7.77264e-08	(TF_binding_site|BDTNP1_TFBS_bcd|FBsf0000333903);(TF_binding_site|BDTNP1_TFBS_da|FBsf0000327163);(TF_binding_site|BDTNP1_TFBS_dl|FBsf0000307658);(TF_binding_site|BDTNP1_TFBS_gt|FBsf0000294010);(TF_binding_site|BDTNP1_TFBS_hb|FBsf0000291449);(TF_binding_site|BDTNP1_TFBS_kni|FBsf0000289775);(TF_binding_site|BDTNP1_TFBS_Med|FBsf0000283216);(TF_binding_site|BDTNP1_TFBS_prd|FBsf0000275640);(TF_binding…
28	1	3L_4241834_INS	FBgn0035515	CG14997	INTRON	0	AAGGGCAATTGAGATAAATTTAAGTTGGGTTGACCAAGGTCCGGTTTCTCGAGGTGTTACGTAAGTCTCAGTAGAAAAGTGCAATTGA	A	A	0.1026	4	35	-2.244	3.61027e-07	(TF_binding_site|BDTNP1_TFBS_dl|FBsf0000305563);(TF_binding_site|mE1_TFBS_HSA|FBsf0000362075)
28	1	3L_4241834_INS	FBgn0011692	pav	UPSTREAM	899	AAGGGCAATTGAGATAAATTTAAGTTGGGTTGACCAAGGTCCGGTTTCTCGAGGTGTTACGTAAGTCTCAGTAGAAAAGTGCAATTGA	A	A	0.1026	4	35	-2.244	3.61027e-07	(TF_binding_site|BDTNP1_TFBS_dl|FBsf0000305563);(TF_binding_site|mE1_TFBS_HSA|FBsf0000362075)
28	1	3L_4830027_SNP	FBgn0035577	CG13708	NON_SYNONYMOUS_CODING	0	T	C	C	0.1	4	36	-2.177	8.5218e-07	(TF_binding_site|mE1_TFBS_cad|FBsf0000244255);(TF_binding_site|mE1_TFBS_chinmo|FBsf0000209774)
28	1	3L_4830027_SNP	FBgn0027085	Aats-leu	DOWNSTREAM	989	T	C	C	0.1	4	36	-2.177	8.5218e-07	(TF_binding_site|mE1_TFBS_cad|FBsf0000244255);(TF_binding_site|mE1_TFBS_chinmo|FBsf0000209774)
28	1	3L_5818741_INS	FBgn0003984	vn	INTRON	0	TT	T	T	0.1	4	36	-2.177	8.5218e-07	-
28	1	3R_11509536_SNP	FBgn0053207	pxb	INTRON	0	A	G	A	0.1053	4	34	-2.195	1.01931e-06	-
28	1	3R_13013567_SNP	FBgn0038492	Mur89F	INTRON	0	G	T	G	0.1026	4	35	-2.17	1.67227e-06	-
28	1	3R_18149467_SNP	FBgn0263117	CG34377	UTR_5_PRIME	0	T	G	G	0.1316	5	33	-2.003	7.51721e-07	-
28	1	3R_21827813_SNP	FBgn0266397	CR45037	INTRON	0	T	A	A	0.1	4	36	-2.139	1.68882e-06	(TF_binding_site|BDTNP1_TFBS_da|FBsf0000330507);(TF_binding_site|BDTNP1_TFBS_dl|FBsf0000314130);(TF_binding_site|BDTNP1_TFBS_Med|FBsf0000286599);(TF_binding_site|BDTNP1_TFBS_prd|FBsf0000276846);(TF_binding_site|BDTNP1_TFBS_twi|FBsf0000266079);(TF_binding_site|BDTNP1_TFBS_z|FBsf0000197873)
28	1	3R_21827919_SNP	FBgn0266397	CR45037	EXON	0	G	A	A	0.1026	4	35	-2.207	5.72613e-07	(TF_binding_site|BDTNP1_TFBS_da|FBsf0000330507);(TF_binding_site|BDTNP1_TFBS_dl|FBsf0000314130);(TF_binding_site|BDTNP1_TFBS_Med|FBsf0000286600);(TF_binding_site|BDTNP1_TFBS_prd|FBsf0000276846);(TF_binding_site|BDTNP1_TFBS_twi|FBsf0000266079);(TF_binding_site|BDTNP1_TFBS_z|FBsf0000197873);(TF_binding_site|mE1_TFBS_disco|FBsf0000261060)
28	1	3R_21827952_SNP	FBgn0266397	CR45037	EXON	0	G	C	C	0.1	4	36	-2.139	1.68882e-06	(TF_binding_site|BDTNP1_TFBS_da|FBsf0000330507);(TF_binding_site|BDTNP1_TFBS_dl|FBsf0000314130);(TF_binding_site|BDTNP1_TFBS_Med|FBsf0000286600);(TF_binding_site|BDTNP1_TFBS_twi|FBsf0000266079);(TF_binding_site|BDTNP1_TFBS_z|FBsf0000197873);(TF_binding_site|mE1_TFBS_disco|FBsf0000261060);(TF_binding_site|mE1_TFBS_sens|FBsf0000233625)
28	1	3R_21828234_SNP	FBgn0266397	CR45037	DOWNSTREAM	48	T	C	C	0.1	4	36	-2.139	1.68882e-06	(TF_binding_site|BDTNP1_TFBS_da|FBsf0000330507);(TF_binding_site|BDTNP1_TFBS_dl|FBsf0000314130);(TF_binding_site|BDTNP1_TFBS_Med|FBsf0000286600);(TF_binding_site|BDTNP1_TFBS_prd|FBsf0000276847);(TF_binding_site|BDTNP1_TFBS_twi|FBsf0000266079);(TF_binding_site|BDTNP1_TFBS_z|FBsf0000197874);(TF_binding_site|mE1_TFBS_HSA|FBsf0000375344);(TF_binding_site|mE1_TFBS_sens|FBsf0000233625)
28	1	3R_21829529_SNP	FBgn0266398	CR45038	UPSTREAM	471	A	G	G	0.125	5	35	-2.019	4.19176e-07	(TF_binding_site|BDTNP1_TFBS_da|FBsf0000330508);(TF_binding_site|BDTNP1_TFBS_dl|FBsf0000314131);(TF_binding_site|mE1_TFBS_chinmo|FBsf0000213365);(TF_binding_site|mE1_TFBS_HSA|FBsf0000375344);(TF_binding_site|mE1_TFBS_sens|FBsf0000233625)
28	1	3R_21829662_SNP	FBgn0266398	CR45038	UPSTREAM	338	A	G	G	0.125	5	35	-2.019	4.19176e-07	(TF_binding_site|BDTNP1_TFBS_dl|FBsf0000314131);(TF_binding_site|mE1_TFBS_HSA|FBsf0000375344);(TF_binding_site|mE1_TFBS_sens|FBsf0000233625)
28	1	3R_21837433_SNP	FBgn0002732	E_spl_malpha-BFM	DOWNSTREAM	143	A	G	G	0.1	4	36	-2.251	3.01095e-07	(TF_binding_site|BDTNP1_TFBS_da|FBsf0000330515);(TF_binding_site|BDTNP1_TFBS_dl|FBsf0000314138);(TF_binding_site|BDTNP1_TFBS_Med|FBsf0000286606);(TF_binding_site|BDTNP1_TFBS_slp1|FBsf0000273211);(TF_binding_site|BDTNP1_TFBS_sna|FBsf0000271380);(TF_binding_site|BDTNP1_TFBS_twi|FBsf0000266081);(TF_binding_site|mE1_TFBS_sens|FBsf0000233627);(TF_binding_site|mE1_TFBS_Trl|FBsf0000341740)
28	1	3R_21838059_SNP	FBgn0002732	E_spl_malpha-BFM	DOWNSTREAM	769	C	G	G	0.1	4	36	-2.196	6.66443e-07	(TF_binding_site|BDTNP1_TFBS_da|FBsf0000330516);(TF_binding_site|BDTNP1_TFBS_dl|FBsf0000314139);(TF_binding_site|BDTNP1_TFBS_Med|FBsf0000286606);(TF_binding_site|mE1_TFBS_HSA|FBsf0000375348)
28	1	3R_21841666_SNP	FBgn0266400	CR45040	EXON	0	A	G	G	0.1026	4	35	-2.182	8.84126e-07	(TF_binding_site|BDTNP1_TFBS_da|FBsf0000330518);(TF_binding_site|BDTNP1_TFBS_dl|FBsf0000314142);(TF_binding_site|BDTNP1_TFBS_Med|FBsf0000286610);(TF_binding_site|BDTNP1_TFBS_prd|FBsf0000276850);(TF_binding_site|mE1_TFBS_HSA|FBsf0000375351);(TF_binding_site|mE1_TFBS_sens|FBsf0000233630)
28	1	3R_21841666_SNP	FBgn0002578	Kaz-m1	DOWNSTREAM	492	A	G	G	0.1026	4	35	-2.182	8.84126e-07	(TF_binding_site|BDTNP1_TFBS_da|FBsf0000330518);(TF_binding_site|BDTNP1_TFBS_dl|FBsf0000314142);(TF_binding_site|BDTNP1_TFBS_Med|FBsf0000286610);(TF_binding_site|BDTNP1_TFBS_prd|FBsf0000276850);(TF_binding_site|mE1_TFBS_HSA|FBsf0000375351);(TF_binding_site|mE1_TFBS_sens|FBsf0000233630)
28	1	3R_21841666_SNP	FBgn0002592	E_spl_m2-BFM	DOWNSTREAM	570	A	G	G	0.1026	4	35	-2.182	8.84126e-07	(TF_binding_site|BDTNP1_TFBS_da|FBsf0000330518);(TF_binding_site|BDTNP1_TFBS_dl|FBsf0000314142);(TF_binding_site|BDTNP1_TFBS_Med|FBsf0000286610);(TF_binding_site|BDTNP1_TFBS_prd|FBsf0000276850);(TF_binding_site|mE1_TFBS_HSA|FBsf0000375351);(TF_binding_site|mE1_TFBS_sens|FBsf0000233630)
28	1	3R_9895896_DEL	FBgn0038197	foxo	INTRON	0	A	AAGGCAATGGCCTTGCCAGTAATGCGCCA	AAGGCAATGGCCTTGCCAGTAATGCGCCA	0.1026	4	35	-2.399	1.37792e-08	-
28	1	X_12437851_SNP	FBgn0264542	CG43921	INTRON	0	A	C	C	0.1026	4	35	-2.135	1.59391e-06	-
28	1	X_13152215_SNP	FBgn0030462	CG15742	SYNONYMOUS_CODING	0	A	G	G	0.1081	4	33	-2.172	1.80406e-06	(TF_binding_site|BDTNP1_TFBS_dl|FBsf0000318786);(TF_binding_site|BDTNP1_TFBS_twi|FBsf0000205885);(TF_binding_site|mE1_TFBS_bab1|FBsf0000215030);(TF_binding_site|mE1_TFBS_h|FBsf0000257998);(TF_binding_site|mE1_TFBS_HSA|FBsf0000382079);(TF_binding_site|mE1_TFBS_run|FBsf0000336079)
28	1	X_13152215_SNP	FBgn0004456	mew	INTRON	0	A	G	G	0.1081	4	33	-2.172	1.80406e-06	(TF_binding_site|BDTNP1_TFBS_dl|FBsf0000318786);(TF_binding_site|BDTNP1_TFBS_twi|FBsf0000205885);(TF_binding_site|mE1_TFBS_bab1|FBsf0000215030);(TF_binding_site|mE1_TFBS_h|FBsf0000257998);(TF_binding_site|mE1_TFBS_HSA|FBsf0000382079);(TF_binding_site|mE1_TFBS_run|FBsf0000336079)
28	1	X_13152215_SNP	FBgn0000346	comt	UPSTREAM	839	A	G	G	0.1081	4	33	-2.172	1.80406e-06	(TF_binding_site|BDTNP1_TFBS_dl|FBsf0000318786);(TF_binding_site|BDTNP1_TFBS_twi|FBsf0000205885);(TF_binding_site|mE1_TFBS_bab1|FBsf0000215030);(TF_binding_site|mE1_TFBS_h|FBsf0000257998);(TF_binding_site|mE1_TFBS_HSA|FBsf0000382079);(TF_binding_site|mE1_TFBS_run|FBsf0000336079)
28	1	X_17260089_SNP	Intergenic	Intergenic			C	G	G	0.1026	4	35	-2.231	5.69018e-07	(TF_binding_site|mE1_TFBS_cnc|FBsf0000206824);(TF_binding_site|mE1_TFBS_HSA|FBsf0000348844)
28	1	X_21278657_SNP	Intergenic	Intergenic			G	T	T	0.1	4	36	-2.167	1.66933e-06	-
28	2	3L_20801167_SNP	FBgn0037026	CG3634	SYNONYMOUS_CODING	0	A	G	G	0.3889	14	22	1.158	1.57337e-06	(TF_binding_site|mE1_TFBS_cad|FBsf0000245513);(TF_binding_site|mE1_TFBS_chinmo|FBsf0000210484);(TF_binding_site|mE1_TFBS_HSA|FBsf0000367315)
28	2	3L_20808180_SNP	FBgn0037028	CG3618	SYNONYMOUS_CODING	0	A	G	A	0.4865	18	19	1.114	1.23309e-06	(TF_binding_site|mE1_TFBS_chinmo|FBsf0000210485);(TF_binding_site|mE1_TFBS_sens|FBsf0000225508)
28	2	3L_588460_SNP	FBgn0035144	Kah	INTRON	0	G	C	G	0.4359	17	22	-1.083	1.34252e-06	(TF_binding_site|mE1_TFBS_chinmo|FBsf0000209446)
28	4	2L_15382080_SNP	Intergenic	Intergenic			C	T	C	0.2895	11	27	0.7005	1.0143e-06	-
28	4	2L_2387506_SNP	Intergenic	Intergenic			C	T	T	0.3	12	28	-0.7164	2.5962e-07	(TF_binding_site|BDTNP1_TFBS_twi|FBsf0000200641)
28	4	2L_7775640_SNP	FBgn0020880	CG7179	DOWNSTREAM	164	T	C	C	0.1842	7	31	-0.8188	1.29226e-06	-
28	4	2L_7775640_SNP	FBgn0031945	CG7191	DOWNSTREAM	607	T	C	C	0.1842	7	31	-0.8188	1.29226e-06	-
28	4	2L_7775687_DEL	FBgn0020880	CG7179	DOWNSTREAM	117	T	CGGATGCCGCGGGTTAGGATCGCAGATTAATGCTGAGTAA	CGGATGCCGCGGGTTAGGATCGCAGATTAATGCTGAGTAA	0.2051	8	31	-0.8459	5.58856e-08	-
28	4	2L_7775687_DEL	FBgn0031945	CG7191	DOWNSTREAM	654	T	CGGATGCCGCGGGTTAGGATCGCAGATTAATGCTGAGTAA	CGGATGCCGCGGGTTAGGATCGCAGATTAATGCTGAGTAA	0.2051	8	31	-0.8459	5.58856e-08	-
28	4	2R_10171585_SNP	FBgn0263397	Ih	INTRON	0	G	A	A	0.3158	12	26	-0.7086	2.48504e-07	(TF_binding_site|mE1_TFBS_cad|FBsf0000246632)
28	4	2R_13405734_SNP	FBgn0034232	CG4866	UTR_5_PRIME	0	C	T	C	0.4872	19	20	0.642	2.10677e-06	(TF_binding_site|BDTNP1_TFBS_dl|FBsf0000302798);(TF_binding_site|BDTNP1_TFBS_Med|FBsf0000280674);(TF_binding_site|BDTNP1_TFBS_twi|FBsf0000199643);(TF_binding_site|mE1_TFBS_cad|FBsf0000246875);(TF_binding_site|mE1_TFBS_HSA|FBsf0000357760)
28	4	2R_13405734_SNP	FBgn0034231	APC10	UPSTREAM	43	C	T	C	0.4872	19	20	0.642	2.10677e-06	(TF_binding_site|BDTNP1_TFBS_dl|FBsf0000302798);(TF_binding_site|BDTNP1_TFBS_Med|FBsf0000280674);(TF_binding_site|BDTNP1_TFBS_twi|FBsf0000199643);(TF_binding_site|mE1_TFBS_cad|FBsf0000246875);(TF_binding_site|mE1_TFBS_HSA|FBsf0000357760)
28	4	2R_13405734_SNP	FBgn0034230	CG4853	DOWNSTREAM	784	C	T	C	0.4872	19	20	0.642	2.10677e-06	(TF_binding_site|BDTNP1_TFBS_dl|FBsf0000302798);(TF_binding_site|BDTNP1_TFBS_Med|FBsf0000280674);(TF_binding_site|BDTNP1_TFBS_twi|FBsf0000199643);(TF_binding_site|mE1_TFBS_cad|FBsf0000246875);(TF_binding_site|mE1_TFBS_HSA|FBsf0000357760)
28	4	2R_13405734_SNP	FBgn0263197	Patronin	DOWNSTREAM	795	C	T	C	0.4872	19	20	0.642	2.10677e-06	(TF_binding_site|BDTNP1_TFBS_dl|FBsf0000302798);(TF_binding_site|BDTNP1_TFBS_Med|FBsf0000280674);(TF_binding_site|BDTNP1_TFBS_twi|FBsf0000199643);(TF_binding_site|mE1_TFBS_cad|FBsf0000246875);(TF_binding_site|mE1_TFBS_HSA|FBsf0000357760)
28	4	2R_13405870_SNP	FBgn0034232	CG4866	SYNONYMOUS_CODING	0	C	T	C	0.475	19	21	-0.6574	6.25311e-07	(TF_binding_site|BDTNP1_TFBS_Med|FBsf0000280674);(TF_binding_site|BDTNP1_TFBS_twi|FBsf0000199643);(TF_binding_site|mE1_TFBS_cad|FBsf0000246875);(TF_binding_site|mE1_TFBS_HSA|FBsf0000357760)
28	4	2R_13405870_SNP	FBgn0034231	APC10	UPSTREAM	179	C	T	C	0.475	19	21	-0.6574	6.25311e-07	(TF_binding_site|BDTNP1_TFBS_Med|FBsf0000280674);(TF_binding_site|BDTNP1_TFBS_twi|FBsf0000199643);(TF_binding_site|mE1_TFBS_cad|FBsf0000246875);(TF_binding_site|mE1_TFBS_HSA|FBsf0000357760)
28	4	2R_13405870_SNP	FBgn0263197	Patronin	DOWNSTREAM	659	C	T	C	0.475	19	21	-0.6574	6.25311e-07	(TF_binding_site|BDTNP1_TFBS_Med|FBsf0000280674);(TF_binding_site|BDTNP1_TFBS_twi|FBsf0000199643);(TF_binding_site|mE1_TFBS_cad|FBsf0000246875);(TF_binding_site|mE1_TFBS_HSA|FBsf0000357760)
28	4	2R_13405870_SNP	FBgn0034230	CG4853	DOWNSTREAM	920	C	T	C	0.475	19	21	-0.6574	6.25311e-07	(TF_binding_site|BDTNP1_TFBS_Med|FBsf0000280674);(TF_binding_site|BDTNP1_TFBS_twi|FBsf0000199643);(TF_binding_site|mE1_TFBS_cad|FBsf0000246875);(TF_binding_site|mE1_TFBS_HSA|FBsf0000357760)
28	4	2R_13406028_SNP	FBgn0034232	CG4866	SYNONYMOUS_CODING	0	G	A	G	0.475	19	21	-0.6574	6.25311e-07	(TF_binding_site|BDTNP1_TFBS_dl|FBsf0000302799);(TF_binding_site|BDTNP1_TFBS_Med|FBsf0000280674);(TF_binding_site|BDTNP1_TFBS_twi|FBsf0000199644);(TF_binding_site|mE1_TFBS_cad|FBsf0000246875);(TF_binding_site|mE1_TFBS_HSA|FBsf0000357760)
28	4	2R_13406028_SNP	FBgn0034231	APC10	UPSTREAM	337	G	A	G	0.475	19	21	-0.6574	6.25311e-07	(TF_binding_site|BDTNP1_TFBS_dl|FBsf0000302799);(TF_binding_site|BDTNP1_TFBS_Med|FBsf0000280674);(TF_binding_site|BDTNP1_TFBS_twi|FBsf0000199644);(TF_binding_site|mE1_TFBS_cad|FBsf0000246875);(TF_binding_site|mE1_TFBS_HSA|FBsf0000357760)
28	4	2R_13406028_SNP	FBgn0263197	Patronin	DOWNSTREAM	501	G	A	G	0.475	19	21	-0.6574	6.25311e-07	(TF_binding_site|BDTNP1_TFBS_dl|FBsf0000302799);(TF_binding_site|BDTNP1_TFBS_Med|FBsf0000280674);(TF_binding_site|BDTNP1_TFBS_twi|FBsf0000199644);(TF_binding_site|mE1_TFBS_cad|FBsf0000246875);(TF_binding_site|mE1_TFBS_HSA|FBsf0000357760)
28	5	2L_10581311_SNP	FBgn0051721	Trim9	INTRON	0	G	T	T	0.5	19	19	-0.4576	1.96293e-06	-
28	5	2L_10581311_SNP	FBgn0085190	CG34161	NON_SYNONYMOUS_CODING	0	G	T	T	0.5	19	19	-0.4576	1.96293e-06	-
28	5	2L_10581311_SNP	FBgn0250826	CG34160	DOWNSTREAM	987	G	T	T	0.5	19	19	-0.4576	1.96293e-06	-
28	5	3L_22394483_SNP	FBgn0004449	Ten-m	INTRON	0	A	T	T	0.1026	4	35	0.7603	1.52538e-06	(TF_binding_site|BDTNP1_TFBS_bcd|FBsf0000333980);(TF_binding_site|BDTNP1_TFBS_da|FBsf0000327931);(TF_binding_site|BDTNP1_TFBS_dl|FBsf0000309196);(TF_binding_site|BDTNP1_TFBS_gt|FBsf0000294147);(TF_binding_site|BDTNP1_TFBS_hb|FBsf0000291643);(TF_binding_site|BDTNP1_TFBS_Med|FBsf0000283983);(TF_binding_site|BDTNP1_TFBS_prd|FBsf0000275811);(TF_binding_site|BDTNP1_TFBS_sna|FBsf0000269706);(TF_binding…
28	6	2L_17546821_DEL	FBgn0267261	CR45697	UPSTREAM	363	CC	C	CC	0.475	19	21	-0.4843	5.89291e-08	-
28	6	3R_15181465_SNP	FBgn0262839	CG43203	DOWNSTREAM	859	C	G	G	0.2368	9	29	0.5411	1.08546e-06	(TF_binding_site|mE1_TFBS_cad|FBsf0000248766);(TF_binding_site|mE1_TFBS_HSA|FBsf0000373162);(TF_binding_site|mE1_TFBS_Kr|FBsf0000253784)
28	6	3R_15181690_SNP	Intergenic	Intergenic			A	T	T	0.1795	7	32	0.5846	1.63703e-06	(TF_binding_site|BDTNP1_TFBS_da|FBsf0000329825);(TF_binding_site|mE1_TFBS_cad|FBsf0000248766);(TF_binding_site|mE1_TFBS_HSA|FBsf0000373162);(TF_binding_site|mE1_TFBS_Kr|FBsf0000253784)
28	6	3R_15181919_SNP	Intergenic	Intergenic			A	G	G	0.35	14	26	0.4621	1.93112e-06	(TF_binding_site|BDTNP1_TFBS_da|FBsf0000329825);(TF_binding_site|BDTNP1_TFBS_dl|FBsf0000312818);(TF_binding_site|BDTNP1_TFBS_hb|FBsf0000292632);(TF_binding_site|BDTNP1_TFBS_Med|FBsf0000285908);(TF_binding_site|mE1_TFBS_cad|FBsf0000248766);(TF_binding_site|mE1_TFBS_HSA|FBsf0000373162)
28	6	3R_15182444_SNP	Intergenic	Intergenic			C	T	T	0.3158	12	26	0.5024	6.40677e-07	(TF_binding_site|BDTNP1_TFBS_da|FBsf0000329825);(TF_binding_site|BDTNP1_TFBS_dl|FBsf0000312818);(TF_binding_site|BDTNP1_TFBS_hb|FBsf0000292632);(TF_binding_site|BDTNP1_TFBS_Med|FBsf0000285908);(TF_binding_site|mE1_TFBS_cad|FBsf0000248766);(TF_binding_site|mE1_TFBS_HSA|FBsf0000373162)
29	1	2L_10455232_SNP	FBgn0032253	CG5322	SYNONYMOUS_CODING	0	G	C	G	0.1	4	36	2.444	4.12062e-08	-
29	1	2L_13142414_SNP	FBgn0032472	CG9928	DOWNSTREAM	31	C	T	T	0.1842	7	31	1.813	6.28586e-07	-
29	1	2L_13142414_SNP	FBgn0040972	CG16978	DOWNSTREAM	800	C	T	T	0.1842	7	31	1.813	6.28586e-07	-
29	1	2L_14177892_SNP	FBgn0263038	CG43333	INTRON	0	G	A	A	0.1081	4	33	2.336	2.70692e-07	-
29	1	2L_17018825_SNP	FBgn0267018	CR45462	UPSTREAM	776	C	T	T	0.1026	4	35	2.303	4.15243e-07	-
29	1	2L_17028737_SNP	Intergenic	Intergenic			C	T	T	0.1053	4	34	2.24	1.28315e-06	-
29	1	2L_17057579_SNP	Intergenic	Intergenic			A	C	C	0.1	4	36	2.229	1.46643e-06	-
29	1	2L_17101713_SNP	Intergenic	Intergenic			A	C	C	0.1	4	36	2.304	4.54846e-07	-
29	1	2L_17102321_SNP	Intergenic	Intergenic			T	G	G	0.1026	4	35	2.298	5.28628e-07	-
29	1	2L_17104348_SNP	FBgn0267004	CR45448	UPSTREAM	797	C	T	T	0.1	4	36	2.229	1.46643e-06	-
29	1	2L_17116899_SNP	Intergenic	Intergenic			C	A	A	0.1	4	36	2.229	1.46643e-06	-
29	1	2L_17157767_SNP	FBgn0083942	CG34106	INTRON	0	A	G	G	0.1026	4	35	2.456	3.24787e-08	-
29	1	2L_17157767_SNP	FBgn0265607	beat-IIIa	INTRON	0	A	G	G	0.1026	4	35	2.456	3.24787e-08	-
29	1	2L_17173151_SNP	FBgn0083942	CG34106	DOWNSTREAM	33	T	A	A	0.1316	5	33	2.085	6.24479e-07	-
29	1	2L_17173151_SNP	FBgn0265607	beat-IIIa	DOWNSTREAM	33	T	A	A	0.1316	5	33	2.085	6.24479e-07	-
29	1	2L_17173151_SNP	FBgn0085198	CG34169	UPSTREAM	330	T	A	A	0.1316	5	33	2.085	6.24479e-07	-
29	1	2L_17178015_SNP	FBgn0045487	Gr36a	DOWNSTREAM	94	T	A	A	0.1081	4	33	2.293	6.246e-07	-
29	1	2L_17178015_SNP	FBgn0045486	Gr36b	UPSTREAM	757	T	A	A	0.1081	4	33	2.293	6.246e-07	-
29	1	2R_10317405_SNP	FBgn0013725	phyl	INTRON	0	T	C	C	0.2051	8	31	1.674	1.36544e-06	(TF_binding_site|BDTNP1_TFBS_da|FBsf0000324229);(TF_binding_site|BDTNP1_TFBS_dl|FBsf0000302117);(TF_binding_site|BDTNP1_TFBS_hb|FBsf0000290173);(TF_binding_site|BDTNP1_TFBS_Med|FBsf0000280339);(TF_binding_site|BDTNP1_TFBS_slp1|FBsf0000272169);(TF_binding_site|BDTNP1_TFBS_sna|FBsf0000267749);(TF_binding_site|BDTNP1_TFBS_twi|FBsf0000199364);(TF_binding_site|mE1_TFBS_cad|FBsf0000246644);(TF_binding_…
29	1	2R_10317638_SNP	FBgn0013725	phyl	INTRON	0	A	C	C	0.175	7	33	1.793	9.23429e-07	(TF_binding_site|BDTNP1_TFBS_bcd|FBsf0000333436);(TF_binding_site|BDTNP1_TFBS_da|FBsf0000324229);(TF_binding_site|BDTNP1_TFBS_dl|FBsf0000302117);(TF_binding_site|BDTNP1_TFBS_hb|FBsf0000290173);(TF_binding_site|BDTNP1_TFBS_Med|FBsf0000280339);(TF_binding_site|BDTNP1_TFBS_slp1|FBsf0000272169);(TF_binding_site|BDTNP1_TFBS_sna|FBsf0000267750);(TF_binding_site|BDTNP1_TFBS_twi|FBsf0000199364);(TF_bindi…
29	1	2R_10677939_SNP	FBgn0001319	kn	INTRON	0	T	G	G	0.1	4	36	2.304	4.54846e-07	(TF_binding_site|BDTNP1_TFBS_dl|FBsf0000302193)
29	1	2R_2093490_SNP	FBgn0050431	CG30431	DOWNSTREAM	761	T	G	G	0.1795	7	32	1.831	3.36735e-07	(TF_binding_site|mE1_TFBS_HSA|FBsf0000353729);(TF_binding_site|mE1_TFBS_sbb|FBsf0000251168)
29	1	2R_4403368_SNP	FBgn0050361	mtt	INTRON	0	C	T	T	0.125	5	35	2.081	4.58944e-07	-
29	1	2R_6154812_SNP	FBgn0033502	CG12910	INTRON	0	A	G	G	0.1026	4	35	2.331	3.38676e-07	(TF_binding_site|BDTNP1_TFBS_da|FBsf0000323698)
29	1	3L_10106006_SNP	FBgn0040823	dpr6	INTRON	0	A	T	T	0.1026	4	35	2.222	1.48189e-06	-
29	1	3L_1174066_SNP	FBgn0025525	bab2	SYNONYMOUS_CODING	0	G	T	T	0.1026	4	35	2.246	1.28066e-06	(TF_binding_site|mE1_TFBS_cad|FBsf0000243931);(TF_binding_site|mE1_TFBS_HSA|FBsf0000361007);(TF_binding_site|mE1_TFBS_sens|FBsf0000222344)
29	1	3L_12257099_SNP	FBgn0260941	app	INTRON	0	C	A	A	0.1143	4	31	2.242	1.49366e-06	-
29	1	3L_3760874_SNP	FBgn0052264	CG32264	INTRON	0	A	C	C	0.2051	8	31	1.787	1.1799e-07	-
29	1	3L_3760896_SNP	FBgn0052264	CG32264	INTRON	0	T	A	A	0.2	8	32	1.769	1.57752e-07	-
29	1	3L_3760935_SNP	FBgn0052264	CG32264	INTRON	0	C	T	T	0.1795	7	32	1.751	1.97764e-06	-
29	1	3L_5064913_SNP	FBgn0005775	Con	INTRON	0	A	T	T	0.1	4	36	2.234	1.17924e-06	-
29	1	3L_7930199_SNP	FBgn0035827	Srp9	UTR_3_PRIME	0	T	C	C	0.15	6	34	1.962	3.05569e-07	(TF_binding_site|BDTNP1_TFBS_dl|FBsf0000306129);(TF_binding_site|BDTNP1_TFBS_Med|FBsf0000282420);(TF_binding_site|mE1_TFBS_cad|FBsf0000244447);(TF_binding_site|mE1_TFBS_HSA|FBsf0000363120)
29	1	3L_7930199_SNP	FBgn0024187	syd	UPSTREAM	979	T	C	C	0.15	6	34	1.962	3.05569e-07	(TF_binding_site|BDTNP1_TFBS_dl|FBsf0000306129);(TF_binding_site|BDTNP1_TFBS_Med|FBsf0000282420);(TF_binding_site|mE1_TFBS_cad|FBsf0000244447);(TF_binding_site|mE1_TFBS_HSA|FBsf0000363120)
29	1	3L_8375149_SNP	FBgn0001253	ImpE1	INTRON	0	G	A	A	0.1026	4	35	2.298	5.28628e-07	-
29	1	3L_9733349_SNP	FBgn0259163	CG42268	INTRON	0	T	C	C	0.1026	4	35	2.306	4.66622e-07	-
29	1	3R_13460170_SNP	FBgn0262794	CG43175	INTRON	0	G	T	T	0.1053	4	34	2.208	1.91316e-06	-
29	1	3R_13460499_SNP	FBgn0262794	CG43175	INTRON	0	T	G	G	0.1026	4	35	2.256	1.22291e-06	-
29	1	3R_25544925_SNP	FBgn0039686	CG15506	INTRON	0	G	A	A	0.1026	4	35	2.436	5.18369e-08	(regulatory_region|REDfly_CRMs|FBsf0000436001)
29	1	3R_25844378_SNP	FBgn0039738	Mgat2	INTRON	0	C	A	A	0.1111	4	32	2.269	1.14515e-06	(TF_binding_site|mE1_TFBS_chinmo|FBsf0000213744);(TF_binding_site|mE1_TFBS_HSA|FBsf0000376547)
29	1	X_10377165_SNP	FBgn0052687	CG32687	SYNONYMOUS_CODING	0	G	T	T	0.1026	4	35	2.289	5.20955e-07	-
29	1	X_10377172_SNP	FBgn0052687	CG32687	SYNONYMOUS_CODING	0	G	A	A	0.1053	4	34	2.301	6.59683e-07	-
29	1	X_11027934_SNP	FBgn0030268	Klp10A	INTRON	0	A	G	G	0.1	4	36	2.234	1.17924e-06	-
29	1	X_11027940_SNP	FBgn0030268	Klp10A	INTRON	0	C	T	T	0.1	4	36	2.234	1.17924e-06	-
29	1	X_13504457_SNP	FBgn0030500	Ndc80	SYNONYMOUS_CODING	0	A	G	G	0.1538	6	33	1.858	1.95779e-06	(TF_binding_site|mE1_TFBS_chinmo|FBsf0000208859);(TF_binding_site|mE1_TFBS_sens|FBsf0000220826)
29	1	X_13504457_SNP	FBgn0030499	CG11178	DOWNSTREAM	895	A	G	G	0.1538	6	33	1.858	1.95779e-06	(TF_binding_site|mE1_TFBS_chinmo|FBsf0000208859);(TF_binding_site|mE1_TFBS_sens|FBsf0000220826)
29	1	X_21344731_SNP	Intergenic	Intergenic			A	G	G	0.1579	6	32	1.798	1.08719e-06	(TF_binding_site|BDTNP1_TFBS_twi|FBsf0000263935)
29	2	3R_21992584_SNP	Intergenic	Intergenic			A	C	C	0.1892	7	30	1.178	1.36453e-06	-
29	4	2R_19489050_SNP	FBgn0067903	IM18	INTRON	0	T	C	C	0.1795	7	32	-0.8172	1.72875e-06	(TF_binding_site|mE1_TFBS_bab1|FBsf0000214343);(TF_binding_site|mE1_TFBS_cad|FBsf0000247357);(TF_binding_site|mE1_TFBS_HSA|FBsf0000359850)
29	4	2R_19489050_SNP	FBgn0260455	CG10332	INTRON	0	T	C	C	0.1795	7	32	-0.8172	1.72875e-06	(TF_binding_site|mE1_TFBS_bab1|FBsf0000214343);(TF_binding_site|mE1_TFBS_cad|FBsf0000247357);(TF_binding_site|mE1_TFBS_HSA|FBsf0000359850)
29	4	2R_19489050_SNP	FBgn0262845	CG43209	DOWNSTREAM	454	T	C	C	0.1795	7	32	-0.8172	1.72875e-06	(TF_binding_site|mE1_TFBS_bab1|FBsf0000214343);(TF_binding_site|mE1_TFBS_cad|FBsf0000247357);(TF_binding_site|mE1_TFBS_HSA|FBsf0000359850)
29	4	2R_19489050_SNP	FBgn0260761	CG42559	UPSTREAM	740	T	C	C	0.1795	7	32	-0.8172	1.72875e-06	(TF_binding_site|mE1_TFBS_bab1|FBsf0000214343);(TF_binding_site|mE1_TFBS_cad|FBsf0000247357);(TF_binding_site|mE1_TFBS_HSA|FBsf0000359850)
29	4	2R_19489050_SNP	FBgn0260762	CG42560	UPSTREAM	740	T	C	C	0.1795	7	32	-0.8172	1.72875e-06	(TF_binding_site|mE1_TFBS_bab1|FBsf0000214343);(TF_binding_site|mE1_TFBS_cad|FBsf0000247357);(TF_binding_site|mE1_TFBS_HSA|FBsf0000359850)
29	4	3L_11236592_SNP	Intergenic	Intergenic			A	G	A	0.1053	4	34	-1.029	2.12364e-06	(TF_binding_site|BDTNP1_TFBS_da|FBsf0000326650);(TF_binding_site|BDTNP1_TFBS_dl|FBsf0000306829);(TF_binding_site|BDTNP1_TFBS_gt|FBsf0000293906);(TF_binding_site|BDTNP1_TFBS_hb|FBsf0000291331);(TF_binding_site|BDTNP1_TFBS_Med|FBsf0000282764);(TF_binding_site|BDTNP1_TFBS_prd|FBsf0000275513);(TF_binding_site|BDTNP1_TFBS_shn|FBsf0000273917);(TF_binding_site|BDTNP1_TFBS_slp1|FBsf0000272546);(TF_bindin…
29	4	3L_11236658_SNP	Intergenic	Intergenic			T	C	T	0.1	4	36	-1.039	1.37027e-06	(TF_binding_site|BDTNP1_TFBS_da|FBsf0000326650);(TF_binding_site|BDTNP1_TFBS_dl|FBsf0000306829);(TF_binding_site|BDTNP1_TFBS_gt|FBsf0000293906);(TF_binding_site|BDTNP1_TFBS_hb|FBsf0000291331);(TF_binding_site|BDTNP1_TFBS_Med|FBsf0000282764);(TF_binding_site|BDTNP1_TFBS_prd|FBsf0000275513);(TF_binding_site|BDTNP1_TFBS_shn|FBsf0000273917);(TF_binding_site|BDTNP1_TFBS_slp1|FBsf0000272546);(TF_bindin…
29	4	3L_16906107_DEL	FBgn0261565	Lmpt	INTRON	0	A	AGCCCAACGGAAG	AGCCCAACGGAAG	0.1515	5	28	-0.9444	1.82263e-06	-
29	4	3R_25802109_SNP	Intergenic	Intergenic			C	T	T	0.1842	7	31	-0.8094	1.87069e-06	-
29	5	3R_14810608_SNP	FBgn0026239	gukh	SYNONYMOUS_CODING	0	C	T	T	0.3611	13	23	0.5518	2.0721e-06	(TF_binding_site|BDTNP1_TFBS_dl|FBsf0000312722);(TF_binding_site|mE1_TFBS_chinmo|FBsf0000212927);(TF_binding_site|mE1_TFBS_HSA|FBsf0000373031)
29	6	2L_14299229_INS	FBgn0261563	wb	INTRON	0	TT	T	T	0.475	19	21	0.4621	2.92378e-07	-
29	6	2L_14311656_SNP	FBgn0261563	wb	INTRON	0	T	A	T	0.35	14	26	0.4652	8.34548e-07	-
29	6	2R_15127730_SNP	FBgn0010434	cora	INTRON	0	T	G	G	0.2703	10	27	0.5181	9.14315e-07	(TF_binding_site|mE1_TFBS_cad|FBsf0000247003);(TF_binding_site|mE1_TFBS_HSA|FBsf0000358336);(TF_binding_site|mE1_TFBS_sens|FBsf0000228860)
30	2	2L_17073203_SNP	Intergenic	Intergenic			T	C	T	0.2632	10	28	-1.245	1.38141e-06	-
30	2	3R_17998410_INS	FBgn0051163	SKIP	INTRON	0	AA	A	A	0.2821	11	28	1.099	1.2386e-06	(TF_binding_site|BDTNP1_TFBS_da|FBsf0000330144);(TF_binding_site|mE1_TFBS_cnc|FBsf0000206686);(TF_binding_site|mE1_TFBS_HSA|FBsf0000374050)
30	2	3R_17998480_SNP	FBgn0051163	SKIP	INTRON	0	A	T	T	0.3	12	28	1.092	7.19087e-07	(TF_binding_site|BDTNP1_TFBS_da|FBsf0000330144);(TF_binding_site|mE1_TFBS_cnc|FBsf0000206686);(TF_binding_site|mE1_TFBS_HSA|FBsf0000374050)
30	2	3R_18095653_SNP	FBgn0051163	SKIP	INTRON	0	A	G	G	0.475	19	21	-1.14	3.83593e-08	-
30	3	2L_8196316_SNP	FBgn0264947	CR44116	EXON	0	C	G	C	0.4444	16	20	0.9332	4.18767e-07	(TF_binding_site|mE1_TFBS_chinmo|FBsf0000207458);(TF_binding_site|mE1_TFBS_sens|FBsf0000216759)
30	3	2L_8196316_SNP	FBgn0031995	CG8475	SYNONYMOUS_CODING	0	C	G	C	0.4444	16	20	0.9332	4.18767e-07	(TF_binding_site|mE1_TFBS_chinmo|FBsf0000207458);(TF_binding_site|mE1_TFBS_sens|FBsf0000216759)
30	3	2L_8196316_SNP	FBgn0031996	CG8460	UPSTREAM	877	C	G	C	0.4444	16	20	0.9332	4.18767e-07	(TF_binding_site|mE1_TFBS_chinmo|FBsf0000207458);(TF_binding_site|mE1_TFBS_sens|FBsf0000216759)
30	4	2L_12557500_SNP	Intergenic	Intergenic			G	A	G	0.2564	10	29	0.8641	1.02339e-06	-
30	4	2L_9099071_SNP	FBgn0265675	CR44482	UPSTREAM	326	C	T	T	0.2564	10	29	0.8615	9.57764e-07	-
30	4	2L_9099071_SNP	FBgn0051609	CG31609	DOWNSTREAM	896	C	T	T	0.2564	10	29	0.8615	9.57764e-07	-
30	4	2R_10789662_SNP	FBgn0027596	CG10249	INTRON	0	T	C	C	0.2308	9	30	0.8658	1.88792e-06	(TF_binding_site|BDTNP1_TFBS_sna|FBsf0000267757);(TF_binding_site|mE1_TFBS_HSA|FBsf0000356864)
30	4	2R_10789662_SNP	FBgn0033982	Cyp317a1	UTR_3_PRIME	0	T	C	C	0.2308	9	30	0.8658	1.88792e-06	(TF_binding_site|BDTNP1_TFBS_sna|FBsf0000267757);(TF_binding_site|mE1_TFBS_HSA|FBsf0000356864)
30	4	2R_10789682_INS	FBgn0033982	Cyp317a1	UTR_3_PRIME	0	TGAACA	T	T	0.2121	7	26	1.052	9.47452e-08	(TF_binding_site|BDTNP1_TFBS_sna|FBsf0000267757);(TF_binding_site|mE1_TFBS_HSA|FBsf0000356864)
30	4	2R_10789682_INS	FBgn0027596	CG10249	INTRON	0	TGAACA	T	T	0.2121	7	26	1.052	9.47452e-08	(TF_binding_site|BDTNP1_TFBS_sna|FBsf0000267757);(TF_binding_site|mE1_TFBS_HSA|FBsf0000356864)
30	4	3R_14579759_DEL	FBgn0038651	CG14299	INTRON	0	A	AA	AA	0.4	14	21	-0.7966	1.80608e-06	-
30	4	3R_24288481_SNP	FBgn0039584	beat-VI	INTRON	0	C	T	C	0.4595	17	20	0.7585	1.80185e-06	-
30	4	X_907284_SNP	FBgn0003638	su_w[a_	UTR_5_PRIME	0	G	C	C	0.1282	5	34	1.118	1.12531e-06	-
30	4	X_907284_SNP	FBgn0029552	CG14631	DOWNSTREAM	627	G	C	C	0.1282	5	34	1.118	1.12531e-06	-
30	4	X_907284_SNP	FBgn0040351	CG11638	DOWNSTREAM	733	G	C	C	0.1282	5	34	1.118	1.12531e-06	-
30	5	2L_10550000_SNP	FBgn0051721	Trim9	INTRON	0	G	A	A	0.275	11	29	0.8396	5.9772e-10	(TF_binding_site|BDTNP1_TFBS_da|FBsf0000322117);(TF_binding_site|BDTNP1_TFBS_dl|FBsf0000297975);(TF_binding_site|BDTNP1_TFBS_Med|FBsf0000278267);(TF_binding_site|BDTNP1_TFBS_twi|FBsf0000201434);(TF_binding_site|mE1_TFBS_cad|FBsf0000241835);(TF_binding_site|mE1_TFBS_HSA|FBsf0000347444);(TF_binding_site|mE1_TFBS_inv|FBsf0000234839)
30	5	2L_10550005_SNP	FBgn0051721	Trim9	INTRON	0	C	G	G	0.2564	10	29	0.8463	3.36311e-09	(TF_binding_site|BDTNP1_TFBS_da|FBsf0000322117);(TF_binding_site|BDTNP1_TFBS_dl|FBsf0000297975);(TF_binding_site|BDTNP1_TFBS_Med|FBsf0000278267);(TF_binding_site|BDTNP1_TFBS_twi|FBsf0000201434);(TF_binding_site|mE1_TFBS_cad|FBsf0000241835);(TF_binding_site|mE1_TFBS_HSA|FBsf0000347444);(TF_binding_site|mE1_TFBS_inv|FBsf0000234839)
30	5	2L_2396443_SNP	FBgn0031424	VGlut	INTRON	0	T	C	C	0.25	10	30	0.7304	3.56563e-07	-
30	5	2L_2396456_SNP	FBgn0031424	VGlut	INTRON	0	G	T	T	0.25	10	30	0.7304	3.56563e-07	-
30	5	3R_14936578_SNP	FBgn0038679	CG6040	INTRON	0	G	A	G	0.2564	10	29	0.7523	7.59782e-07	-
30	6	2R_6561151_INS	FBgn0024836	stan	UTR_5_PRIME	0	A	AA	A	0.4324	16	21	-0.507	1.96351e-06	(TF_binding_site|BDTNP1_TFBS_da|FBsf0000323756);(TF_binding_site|BDTNP1_TFBS_dl|FBsf0000301207);(TF_binding_site|BDTNP1_TFBS_Med|FBsf0000279828);(TF_binding_site|BDTNP1_TFBS_sna|FBsf0000267619);(TF_binding_site|BDTNP1_TFBS_twi|FBsf0000198982);(TF_binding_site|mE1_TFBS_cad|FBsf0000246291);(TF_binding_site|mE1_TFBS_HSA|FBsf0000355364)
30	6	X_5010454_SNP	FBgn0029746	CG15465	INTRON	0	G	A	A	0.3243	12	25	0.5475	1.01361e-06	-
30	6	X_5010454_SNP	FBgn0266098	rg	INTRON	0	G	A	A	0.3243	12	25	0.5475	1.01361e-06	-
30	7	2L_14304251_SNP	FBgn0261563	wb	INTRON	0	G	A	G	0.4359	17	22	-0.516	1.30889e-06	(TF_binding_site|mE1_TFBS_inv|FBsf0000234935)
30	7	3R_23033248_SNP	Intergenic	Intergenic			T	C	C	0.3	12	28	-0.5632	3.84648e-07	(regulatory_region|REDfly_CRMs|FBsf0000435108);(regulatory_region|REDfly_CRMs|FBsf0000435316);(TF_binding_site|mE1_TFBS_cad|FBsf0000249358)
30	7	3R_4852768_SNP	FBgn0002932	neur	INTRON	0	C	T	C	0.4615	18	21	-0.5126	1.45642e-06	(TF_binding_site|BDTNP1_TFBS_da|FBsf0000328652);(TF_binding_site|BDTNP1_TFBS_dl|FBsf0000310568);(TF_binding_site|mE1_TFBS_HSA|FBsf0000369787);(TF_binding_site|mE1_TFBS_sens|FBsf0000230870)
30	7	3R_6745873_SNP	Intergenic	Intergenic			A	T	A	0.4857	17	18	-0.5498	4.45964e-07	(TF_binding_site|BDTNP1_TFBS_dl|FBsf0000311043);(TF_binding_site|BDTNP1_TFBS_twi|FBsf0000264704);(TF_binding_site|mE1_TFBS_HSA|FBsf0000370472)
30	7	3R_6746960_SNP	Intergenic	Intergenic			A	G	G	0.4211	16	22	0.5342	1.43031e-06	(TF_binding_site|BDTNP1_TFBS_dl|FBsf0000311044);(TF_binding_site|mE1_TFBS_HSA|FBsf0000370472)
30	8	2R_2880374_SNP	FBgn0050159	CG30159	START_GAINED	0	T	G	G	0.2308	9	30	-0.4993	1.60119e-06	(TF_binding_site|BDTNP1_TFBS_da|FBsf0000323335);(TF_binding_site|BDTNP1_TFBS_dl|FBsf0000300351);(TF_binding_site|BDTNP1_TFBS_Med|FBsf0000279408);(TF_binding_site|BDTNP1_TFBS_sna|FBsf0000267443);(TF_binding_site|BDTNP1_TFBS_twi|FBsf0000198615);(TF_binding_site|mE1_TFBS_HSA|FBsf0000353987);(TF_binding_site|mE1_TFBS_sens|FBsf0000226551);(TF_binding_site|mE1_TFBS_Trl|FBsf0000338013)
30	8	2R_2880374_SNP	FBgn0029508	Tsp42Ea	INTRON	0	T	G	G	0.2308	9	30	-0.4993	1.60119e-06	(TF_binding_site|BDTNP1_TFBS_da|FBsf0000323335);(TF_binding_site|BDTNP1_TFBS_dl|FBsf0000300351);(TF_binding_site|BDTNP1_TFBS_Med|FBsf0000279408);(TF_binding_site|BDTNP1_TFBS_sna|FBsf0000267443);(TF_binding_site|BDTNP1_TFBS_twi|FBsf0000198615);(TF_binding_site|mE1_TFBS_HSA|FBsf0000353987);(TF_binding_site|mE1_TFBS_sens|FBsf0000226551);(TF_binding_site|mE1_TFBS_Trl|FBsf0000338013)
31	1	2L_12169236_SNP	FBgn0051760	CG31760	NON_SYNONYMOUS_CODING	0	C	G	C	0.1795	7	32	-1.797	2.04122e-07	-
31	1	2L_1502316_SNP	FBgn0031344	CG7420	INTRON	0	A	G	G	0.1026	4	35	-2.141	1.80857e-06	(TF_binding_site|BDTNP1_TFBS_dl|FBsf0000296039);(TF_binding_site|BDTNP1_TFBS_Med|FBsf0000277203);(TF_binding_site|BDTNP1_TFBS_prd|FBsf0000274731);(TF_binding_site|BDTNP1_TFBS_twi|FBsf0000200580);(TF_binding_site|mE1_TFBS_hkb|FBsf0000254988);(TF_binding_site|mE1_TFBS_HSA|FBsf0000344402)
31	1	2L_1502316_SNP	FBgn0264873	CR44064	INTRON	0	A	G	G	0.1026	4	35	-2.141	1.80857e-06	(TF_binding_site|BDTNP1_TFBS_dl|FBsf0000296039);(TF_binding_site|BDTNP1_TFBS_Med|FBsf0000277203);(TF_binding_site|BDTNP1_TFBS_prd|FBsf0000274731);(TF_binding_site|BDTNP1_TFBS_twi|FBsf0000200580);(TF_binding_site|mE1_TFBS_hkb|FBsf0000254988);(TF_binding_site|mE1_TFBS_HSA|FBsf0000344402)
31	1	2L_15933268_SNP	FBgn0028645	beat-Ib	INTRON	0	G	A	A	0.1714	6	29	-1.832	1.45179e-06	-
31	1	2L_16257304_SNP	FBgn0024734	PRL-1	UTR_5_PRIME	0	A	G	G	0.175	7	33	-1.692	1.67135e-06	(TF_binding_site|BDTNP1_TFBS_dl|FBsf0000298876);(TF_binding_site|BDTNP1_TFBS_Med|FBsf0000278710);(TF_binding_site|mE1_TFBS_D|FBsf0000238175);(TF_binding_site|mE1_TFBS_disco|FBsf0000259421);(TF_binding_site|mE1_TFBS_GATAe|FBsf0000258286);(TF_binding_site|mE1_TFBS_h|FBsf0000256481);(TF_binding_site|mE1_TFBS_HSA|FBsf0000351546);(TF_binding_site|mE1_TFBS_inv|FBsf0000234979);(TF_binding_site|mE1_TFBS_…
31	1	2L_16257304_SNP	FBgn0028515	EndoGI	UPSTREAM	384	A	G	G	0.175	7	33	-1.692	1.67135e-06	(TF_binding_site|BDTNP1_TFBS_dl|FBsf0000298876);(TF_binding_site|BDTNP1_TFBS_Med|FBsf0000278710);(TF_binding_site|mE1_TFBS_D|FBsf0000238175);(TF_binding_site|mE1_TFBS_disco|FBsf0000259421);(TF_binding_site|mE1_TFBS_GATAe|FBsf0000258286);(TF_binding_site|mE1_TFBS_h|FBsf0000256481);(TF_binding_site|mE1_TFBS_HSA|FBsf0000351546);(TF_binding_site|mE1_TFBS_inv|FBsf0000234979);(TF_binding_site|mE1_TFBS_…
31	1	2L_16257353_SNP	FBgn0024734	PRL-1	UTR_5_PRIME	0	G	A	A	0.175	7	33	-1.692	1.67135e-06	(TF_binding_site|BDTNP1_TFBS_dl|FBsf0000298876);(TF_binding_site|BDTNP1_TFBS_Med|FBsf0000278710);(TF_binding_site|mE1_TFBS_D|FBsf0000238175);(TF_binding_site|mE1_TFBS_disco|FBsf0000259421);(TF_binding_site|mE1_TFBS_GATAe|FBsf0000258286);(TF_binding_site|mE1_TFBS_h|FBsf0000256481);(TF_binding_site|mE1_TFBS_HSA|FBsf0000351546);(TF_binding_site|mE1_TFBS_inv|FBsf0000234979);(TF_binding_site|mE1_TFBS_…
31	1	2L_16257353_SNP	FBgn0028515	EndoGI	UPSTREAM	335	G	A	A	0.175	7	33	-1.692	1.67135e-06	(TF_binding_site|BDTNP1_TFBS_dl|FBsf0000298876);(TF_binding_site|BDTNP1_TFBS_Med|FBsf0000278710);(TF_binding_site|mE1_TFBS_D|FBsf0000238175);(TF_binding_site|mE1_TFBS_disco|FBsf0000259421);(TF_binding_site|mE1_TFBS_GATAe|FBsf0000258286);(TF_binding_site|mE1_TFBS_h|FBsf0000256481);(TF_binding_site|mE1_TFBS_HSA|FBsf0000351546);(TF_binding_site|mE1_TFBS_inv|FBsf0000234979);(TF_binding_site|mE1_TFBS_…
31	1	2L_16257430_SNP	FBgn0024734	PRL-1	UTR_5_PRIME	0	T	C	C	0.175	7	33	-1.692	1.67135e-06	(TF_binding_site|BDTNP1_TFBS_dl|FBsf0000298876);(TF_binding_site|BDTNP1_TFBS_Med|FBsf0000278710);(TF_binding_site|mE1_TFBS_D|FBsf0000238175);(TF_binding_site|mE1_TFBS_disco|FBsf0000259421);(TF_binding_site|mE1_TFBS_GATAe|FBsf0000258286);(TF_binding_site|mE1_TFBS_h|FBsf0000256481);(TF_binding_site|mE1_TFBS_HSA|FBsf0000351546);(TF_binding_site|mE1_TFBS_inv|FBsf0000234979);(TF_binding_site|mE1_TFBS_…
31	1	2L_16257430_SNP	FBgn0028515	EndoGI	UPSTREAM	258	T	C	C	0.175	7	33	-1.692	1.67135e-06	(TF_binding_site|BDTNP1_TFBS_dl|FBsf0000298876);(TF_binding_site|BDTNP1_TFBS_Med|FBsf0000278710);(TF_binding_site|mE1_TFBS_D|FBsf0000238175);(TF_binding_site|mE1_TFBS_disco|FBsf0000259421);(TF_binding_site|mE1_TFBS_GATAe|FBsf0000258286);(TF_binding_site|mE1_TFBS_h|FBsf0000256481);(TF_binding_site|mE1_TFBS_HSA|FBsf0000351546);(TF_binding_site|mE1_TFBS_inv|FBsf0000234979);(TF_binding_site|mE1_TFBS_…
31	1	2L_16257872_SNP	FBgn0028515	EndoGI	INTRON	0	T	C	C	0.1795	7	32	-1.691	1.86564e-06	(TF_binding_site|BDTNP1_TFBS_dl|FBsf0000298877);(TF_binding_site|BDTNP1_TFBS_Med|FBsf0000278711);(TF_binding_site|mE1_TFBS_HSA|FBsf0000351546);(TF_binding_site|mE1_TFBS_kn|FBsf0000336242);(TF_binding_site|mE1_TFBS_zfh1|FBsf0000334550)
31	1	2L_16257872_SNP	FBgn0024734	PRL-1	UPSTREAM	266	T	C	C	0.1795	7	32	-1.691	1.86564e-06	(TF_binding_site|BDTNP1_TFBS_dl|FBsf0000298877);(TF_binding_site|BDTNP1_TFBS_Med|FBsf0000278711);(TF_binding_site|mE1_TFBS_HSA|FBsf0000351546);(TF_binding_site|mE1_TFBS_kn|FBsf0000336242);(TF_binding_site|mE1_TFBS_zfh1|FBsf0000334550)
31	1	2L_7040889_SNP	FBgn0262872	milt	INTRON	0	A	G	G	0.1282	5	34	-2.078	1.49103e-07	-
31	1	2L_7042092_INS	FBgn0262872	milt	INTRON	0	ACACTTTGTTTTGTAGTGTCTTAAAACTAATTTAACCT	A	A	0.1	4	36	-2.155	1.40081e-06	(regulatory_region|REDfly_CRMs|FBsf0000435564);(TF_binding_site|BDTNP1_TFBS_da|FBsf0000321745);(TF_binding_site|BDTNP1_TFBS_dl|FBsf0000297197);(TF_binding_site|BDTNP1_TFBS_twi|FBsf0000201095);(TF_binding_site|mE1_TFBS_cad|FBsf0000241585);(TF_binding_site|mE1_TFBS_HSA|FBsf0000346294);(TF_binding_site|mE1_TFBS_Ubx|FBsf0000261816)
31	1	2L_7042101_SNP	FBgn0262872	milt	INTRON	0	A	T	T	0.1026	4	35	-2.163	1.29288e-06	(regulatory_region|REDfly_CRMs|FBsf0000435564);(TF_binding_site|BDTNP1_TFBS_da|FBsf0000321745);(TF_binding_site|BDTNP1_TFBS_dl|FBsf0000297197);(TF_binding_site|BDTNP1_TFBS_twi|FBsf0000201095);(TF_binding_site|mE1_TFBS_cad|FBsf0000241585);(TF_binding_site|mE1_TFBS_HSA|FBsf0000346294);(TF_binding_site|mE1_TFBS_Ubx|FBsf0000261816)
31	1	2L_7042103_SNP	FBgn0262872	milt	INTRON	0	C	A	A	0.1026	4	35	-2.163	1.29288e-06	(regulatory_region|REDfly_CRMs|FBsf0000435564);(TF_binding_site|BDTNP1_TFBS_da|FBsf0000321745);(TF_binding_site|BDTNP1_TFBS_dl|FBsf0000297197);(TF_binding_site|BDTNP1_TFBS_twi|FBsf0000201095);(TF_binding_site|mE1_TFBS_cad|FBsf0000241585);(TF_binding_site|mE1_TFBS_HSA|FBsf0000346294);(TF_binding_site|mE1_TFBS_Ubx|FBsf0000261816)
31	1	2L_7042107_SNP	FBgn0262872	milt	INTRON	0	T	A	A	0.1	4	36	-2.155	1.40081e-06	(regulatory_region|REDfly_CRMs|FBsf0000435564);(TF_binding_site|BDTNP1_TFBS_da|FBsf0000321745);(TF_binding_site|BDTNP1_TFBS_dl|FBsf0000297197);(TF_binding_site|BDTNP1_TFBS_twi|FBsf0000201095);(TF_binding_site|mE1_TFBS_cad|FBsf0000241585);(TF_binding_site|mE1_TFBS_HSA|FBsf0000346294);(TF_binding_site|mE1_TFBS_Ubx|FBsf0000261816)
31	1	2L_7042112_SNP	FBgn0262872	milt	INTRON	0	T	A	A	0.1026	4	35	-2.134	2.0185e-06	(regulatory_region|REDfly_CRMs|FBsf0000435564);(TF_binding_site|BDTNP1_TFBS_da|FBsf0000321745);(TF_binding_site|BDTNP1_TFBS_dl|FBsf0000297197);(TF_binding_site|BDTNP1_TFBS_twi|FBsf0000201095);(TF_binding_site|mE1_TFBS_cad|FBsf0000241585);(TF_binding_site|mE1_TFBS_HSA|FBsf0000346294);(TF_binding_site|mE1_TFBS_Ubx|FBsf0000261816)
31	1	2L_7042113_SNP	FBgn0262872	milt	INTRON	0	T	A	A	0.1	4	36	-2.155	1.40081e-06	(regulatory_region|REDfly_CRMs|FBsf0000435564);(TF_binding_site|BDTNP1_TFBS_da|FBsf0000321745);(TF_binding_site|BDTNP1_TFBS_dl|FBsf0000297197);(TF_binding_site|BDTNP1_TFBS_twi|FBsf0000201095);(TF_binding_site|mE1_TFBS_cad|FBsf0000241585);(TF_binding_site|mE1_TFBS_HSA|FBsf0000346294);(TF_binding_site|mE1_TFBS_Ubx|FBsf0000261816)
31	1	2L_7042534_SNP	FBgn0262872	milt	INTRON	0	T	C	C	0.1	4	36	-2.155	1.40081e-06	(TF_binding_site|BDTNP1_TFBS_da|FBsf0000321745);(TF_binding_site|BDTNP1_TFBS_dl|FBsf0000297197);(TF_binding_site|BDTNP1_TFBS_Med|FBsf0000277841);(TF_binding_site|BDTNP1_TFBS_twi|FBsf0000201095);(TF_binding_site|mE1_TFBS_cad|FBsf0000241585);(TF_binding_site|mE1_TFBS_HSA|FBsf0000346294);(TF_binding_site|mE1_TFBS_Ubx|FBsf0000261816)
31	1	2L_7042965_SNP	FBgn0262872	milt	INTRON	0	A	T	T	0.1	4	36	-2.155	1.40081e-06	(TF_binding_site|BDTNP1_TFBS_da|FBsf0000321746);(TF_binding_site|BDTNP1_TFBS_dl|FBsf0000297198);(TF_binding_site|BDTNP1_TFBS_Med|FBsf0000277841);(TF_binding_site|BDTNP1_TFBS_twi|FBsf0000201095);(TF_binding_site|mE1_TFBS_cad|FBsf0000241585);(TF_binding_site|mE1_TFBS_HSA|FBsf0000346294);(TF_binding_site|mE1_TFBS_HSA|FBsf0000346295)
31	1	2L_7989147_SNP	FBgn0031969	pes	NON_SYNONYMOUS_CODING	0	G	A	A	0.1026	4	35	-2.515	1.11344e-09	(TF_binding_site|mE1_TFBS_cad|FBsf0000241657)
31	1	2R_13785731_SNP	FBgn0011589	Elk	INTRON	0	G	T	T	0.1622	6	31	-2.047	1.02751e-08	-
31	1	2R_15119795_SNP	FBgn0010434	cora	INTRON	0	T	C	C	0.1	4	36	-2.155	1.40081e-06	(TF_binding_site|mE1_TFBS_cad|FBsf0000247002);(TF_binding_site|mE1_TFBS_HSA|FBsf0000358333)
31	1	2R_15119931_SNP	FBgn0010434	cora	INTRON	0	T	G	G	0.125	5	35	-2.074	1.50525e-07	(TF_binding_site|mE1_TFBS_cad|FBsf0000247002);(TF_binding_site|mE1_TFBS_HSA|FBsf0000358333)
31	1	2R_2599149_SNP	FBgn0266525	CG45092	INTRON	0	C	A	A	0.1	4	36	-2.437	6.76014e-09	(TF_binding_site|BDTNP1_TFBS_dl|FBsf0000300302);(TF_binding_site|BDTNP1_TFBS_Med|FBsf0000279384);(TF_binding_site|mE1_TFBS_HSA|FBsf0000353876);(TF_binding_site|mE1_TFBS_sens|FBsf0000226492)
31	1	2R_2599149_SNP	FBgn0033095	CG3409	INTRON	0	C	A	A	0.1	4	36	-2.437	6.76014e-09	(TF_binding_site|BDTNP1_TFBS_dl|FBsf0000300302);(TF_binding_site|BDTNP1_TFBS_Med|FBsf0000279384);(TF_binding_site|mE1_TFBS_HSA|FBsf0000353876);(TF_binding_site|mE1_TFBS_sens|FBsf0000226492)
31	1	2R_6618683_SNP	FBgn0033543	CG12338	INTRON	0	T	G	G	0.2973	11	26	-1.407	1.9619e-06	(TF_binding_site|BDTNP1_TFBS_dl|FBsf0000301214);(TF_binding_site|mE1_TFBS_HSA|FBsf0000355384);(TF_binding_site|mE1_TFBS_HSA|FBsf0000355385);(TF_binding_site|mE1_TFBS_Ubx|FBsf0000263015)
31	1	2R_6618683_SNP	FBgn0033544	CG7220	UPSTREAM	157	T	G	G	0.2973	11	26	-1.407	1.9619e-06	(TF_binding_site|BDTNP1_TFBS_dl|FBsf0000301214);(TF_binding_site|mE1_TFBS_HSA|FBsf0000355384);(TF_binding_site|mE1_TFBS_HSA|FBsf0000355385);(TF_binding_site|mE1_TFBS_Ubx|FBsf0000263015)
31	1	2R_7310721_SNP	FBgn0015872	Drip	INTRON	0	C	G	C	0.125	5	35	-1.933	2.02511e-06	-
31	1	3L_12371296_SNP	FBgn0036279	Ncc69	INTRON	0	A	G	A	0.1795	7	32	-1.706	1.38555e-06	-
31	1	3L_13651628_SNP	FBgn0264001	bru-3	INTRON	0	G	C	G	0.2105	8	30	-1.801	2.10037e-08	-
31	1	3L_20755696_SNP	Intergenic	Intergenic			A	T	T	0.1026	4	35	-2.471	3.34923e-09	-
31	1	3L_426877_SNP	Intergenic	Intergenic			T	C	C	0.1842	7	31	-1.712	1.38115e-06	-
31	1	3L_4746815_SNP	FBgn0035574	RhoGEF64C	INTRON	0	G	A	A	0.1	4	36	-2.311	9.53953e-08	-
31	1	3L_4746815_SNP	FBgn0264474	CR43882	UPSTREAM	183	G	A	A	0.1	4	36	-2.311	9.53953e-08	-
31	1	3L_4746917_SNP	FBgn0035574	RhoGEF64C	INTRON	0	T	G	G	0.1	4	36	-2.311	9.53953e-08	-
31	1	3L_4746917_SNP	FBgn0264474	CR43882	UPSTREAM	285	T	G	G	0.1	4	36	-2.311	9.53953e-08	-
31	1	3L_4747029_SNP	FBgn0035574	RhoGEF64C	INTRON	0	G	A	A	0.1	4	36	-2.311	9.53953e-08	-
31	1	3L_4747029_SNP	FBgn0264474	CR43882	UPSTREAM	397	G	A	A	0.1	4	36	-2.311	9.53953e-08	-
31	1	3L_9257494_SNP	FBgn0264000	GluRIB	INTRON	0	A	G	A	0.1053	4	34	-2.036	2.11562e-06	-
31	1	3L_9629397_SNP	FBgn0016081	fry	SYNONYMOUS_CODING	0	C	T	T	0.1081	4	33	-2.242	9.25574e-08	(TF_binding_site|mE1_TFBS_cad|FBsf0000244605)
31	1	3R_10675214_SNP	FBgn0266756	btsz	INTRON	0	T	A	A	0.175	7	33	-1.798	1.78966e-07	-
31	1	3R_10675230_SNP	FBgn0266756	btsz	INTRON	0	C	T	T	0.1579	6	32	-1.857	6.80224e-07	-
31	1	3R_14461557_SNP	FBgn0038632	CG14301	INTRON	0	C	T	T	0.1842	7	31	-1.754	5.80312e-07	-
31	1	3R_14461557_SNP	FBgn0263974	qin	INTRON	0	C	T	T	0.1842	7	31	-1.754	5.80312e-07	-
31	1	3R_7179308_DEL	FBgn0004595	pros	INTRON	0	T	TGGTCTTCGT	TGGTCTTCGT	0.1429	5	30	-2.069	1.67118e-07	(TF_binding_site|BDTNP1_TFBS_bcd|FBsf0000334206);(TF_binding_site|BDTNP1_TFBS_da|FBsf0000328890);(TF_binding_site|BDTNP1_TFBS_dl|FBsf0000311103);(TF_binding_site|BDTNP1_TFBS_hb|FBsf0000292404);(TF_binding_site|BDTNP1_TFBS_Med|FBsf0000285013);(TF_binding_site|BDTNP1_TFBS_prd|FBsf0000276439);(TF_binding_site|BDTNP1_TFBS_sna|FBsf0000270889);(TF_binding_site|BDTNP1_TFBS_twi|FBsf0000264719);(TF_bindin…
31	1	3R_7179308_DEL	FBgn0026064	KP78a	UPSTREAM	456	T	TGGTCTTCGT	TGGTCTTCGT	0.1429	5	30	-2.069	1.67118e-07	(TF_binding_site|BDTNP1_TFBS_bcd|FBsf0000334206);(TF_binding_site|BDTNP1_TFBS_da|FBsf0000328890);(TF_binding_site|BDTNP1_TFBS_dl|FBsf0000311103);(TF_binding_site|BDTNP1_TFBS_hb|FBsf0000292404);(TF_binding_site|BDTNP1_TFBS_Med|FBsf0000285013);(TF_binding_site|BDTNP1_TFBS_prd|FBsf0000276439);(TF_binding_site|BDTNP1_TFBS_sna|FBsf0000270889);(TF_binding_site|BDTNP1_TFBS_twi|FBsf0000264719);(TF_bindin…
31	1	3R_7179308_DEL	FBgn0026063	KP78b	UPSTREAM	456	T	TGGTCTTCGT	TGGTCTTCGT	0.1429	5	30	-2.069	1.67118e-07	(TF_binding_site|BDTNP1_TFBS_bcd|FBsf0000334206);(TF_binding_site|BDTNP1_TFBS_da|FBsf0000328890);(TF_binding_site|BDTNP1_TFBS_dl|FBsf0000311103);(TF_binding_site|BDTNP1_TFBS_hb|FBsf0000292404);(TF_binding_site|BDTNP1_TFBS_Med|FBsf0000285013);(TF_binding_site|BDTNP1_TFBS_prd|FBsf0000276439);(TF_binding_site|BDTNP1_TFBS_sna|FBsf0000270889);(TF_binding_site|BDTNP1_TFBS_twi|FBsf0000264719);(TF_bindin…
[truncated: 184 more rows]
