# Supplementary material for: Systems genetics of the Drosophila metabolome
Source: Genome Res. 2020 Mar;30(3):392–405. doi: 10.1101/gr.243030.118 (PMC7111526; doi:10.1101/gr.243030.118)
Supplement: Supplemental Material [file supp_gr.243030.118_Supplemental_Table_S7.xlsx.xlsx]

## Sheet: S7A
Supplemental Table S7. Gene ontology analyses for candidate genes associated with individual metabolites in (A) females and (B) males; and gene ontology analyses for candidate genes associated with metabolite module PCs in (C) females and (D) males.
GO biological process	Drosophila melanogaster - REFLIST (14217)	Input	Expected	Fold Enrichment	P-value
animal organ development (GO:0048513)	1323	118	45.69	2.58	2.32e-18
locomotion (GO:0040011)	638	74	22.03	3.36	4.56e-16
tube development (GO:0035295)	786	82	27.15	3.02	2.03e-15
system development (GO:0048731)	2300	159	79.43	2	2.25e-15
generation of neurons (GO:0048699)	942	90	32.53	2.77	7.45e-15
anatomical structure morphogenesis (GO:0009653)	1674	128	57.81	2.21	9.8e-15
imaginal disc development (GO:0007444)	644	72	22.24	3.24	1.05e-14
taxis (GO:0042330)	331	50	11.43	4.37	2.4e-14
epithelial tube morphogenesis (GO:0060562)	542	64	18.72	3.42	7.43e-14
tube morphogenesis (GO:0035239)	574	66	19.82	3.33	8.13e-14
regulation of developmental process (GO:0050793)	745	76	25.73	2.95	1.58e-13
single-multicellular organism process (GO:0044707)	3207	193	110.76	1.74	2.03e-13
morphogenesis of an epithelium (GO:0002009)	662	70	22.86	3.06	5.46e-13
cellular component morphogenesis (GO:0032989)	765	76	26.42	2.88	6.48e-13
epithelium development (GO:0060429)	1058	92	36.54	2.52	9.91e-13
post-embryonic animal organ morphogenesis (GO:0048563)	467	57	16.13	3.53	1.2e-12
imaginal disc morphogenesis (GO:0007560)	467	57	16.13	3.53	1.2e-12
animal organ morphogenesis (GO:0009887)	844	80	29.15	2.74	1.23e-12
tissue development (GO:0009888)	1138	96	39.3	2.44	1.29e-12
single-organism developmental process (GO:0044767)	3320	195	114.66	1.7	1.66e-12
tissue morphogenesis (GO:0048729)	679	70	23.45	2.99	1.92e-12
neuron differentiation (GO:0030182)	799	77	27.59	2.79	2.01e-12
wing disc morphogenesis (GO:0007472)	359	49	12.4	3.95	2.57e-12
response to stimulus (GO:0050896)	2667	167	92.11	1.81	2.69e-12
developmental process (GO:0032502)	3361	196	116.08	1.69	2.81e-12
multicellular organism development (GO:0007275)	2888	176	99.74	1.76	3.77e-12
chemotaxis (GO:0006935)	269	42	9.29	4.52	3.89e-12
imaginal disc-derived appendage morphogenesis (GO:0035114)	407	52	14.06	3.7	4.38e-12
single-organism process (GO:0044699)	6094	298	210.46	1.42	4.81e-12
appendage morphogenesis (GO:0035107)	410	52	14.16	3.67	5.85e-12
cell development (GO:0048468)	1484	112	51.25	2.19	6.06e-12
regulation of multicellular organismal process (GO:0051239)	714	71	24.66	2.88	6.94e-12
multicellular organismal process (GO:0032501)	4096	224	141.46	1.58	7.12e-12
post-embryonic appendage morphogenesis (GO:0035120)	398	51	13.75	3.71	7.47e-12
imaginal disc-derived appendage development (GO:0048737)	414	52	14.3	3.64	8.56e-12
wing disc development (GO:0035220)	474	56	16.37	3.42	8.63e-12
anatomical structure development (GO:0048856)	3207	188	110.76	1.7	1.03e-11
appendage development (GO:0048736)	419	52	14.47	3.59	1.37e-11
single-organism cellular process (GO:0044763)	4391	234	151.65	1.54	1.91e-11
post-embryonic animal organ development (GO:0048569)	531	59	18.34	3.22	2.05e-11
imaginal disc-derived wing morphogenesis (GO:0007476)	351	47	12.12	3.88	2.06e-11
nervous system development (GO:0007399)	1617	117	55.84	2.1	2.29e-11
neuron development (GO:0048666)	698	69	24.11	2.86	2.4e-11
instar larval or pupal morphogenesis (GO:0048707)	566	61	19.55	3.12	2.59e-11
axon development (GO:0061564)	314	44	10.84	4.06	3.37e-11
biological regulation (GO:0065007)	4001	218	138.18	1.58	3.82e-11
metamorphosis (GO:0007552)	592	62	20.45	3.03	5.38e-11
cell morphogenesis (GO:0000902)	642	65	22.17	2.93	5.43e-11
cellular developmental process (GO:0048869)	2339	149	80.78	1.84	5.48e-11
cell morphogenesis involved in differentiation (GO:0000904)	496	56	17.13	3.27	5.55e-11
axonogenesis (GO:0007409)	305	43	10.53	4.08	5.6e-11
cell morphogenesis involved in neuron differentiation (GO:0048667)	450	53	15.54	3.41	5.75e-11
post-embryonic animal morphogenesis (GO:0009886)	578	61	19.96	3.06	6.43e-11
movement of cell or subcellular component (GO:0006928)	666	66	23	2.87	8.89e-11
neuron projection guidance (GO:0097485)	257	39	8.88	4.39	1.02e-10
regulation of biological process (GO:0050789)	3626	201	125.23	1.61	1.89e-10
regulation of cellular process (GO:0050794)	3352	190	115.77	1.64	1.9e-10
cell differentiation (GO:0030154)	2307	146	79.67	1.83	1.96e-10
axon guidance (GO:0007411)	248	37	8.56	4.32	7.81e-10
neurogenesis (GO:0022008)	1463	105	50.53	2.08	1.39e-09
cell part morphogenesis (GO:0032990)	556	57	19.2	2.97	1.6e-09
regulation of cell differentiation (GO:0045595)	338	43	11.67	3.68	1.65e-09
cell projection morphogenesis (GO:0048858)	544	56	18.79	2.98	2.22e-09
regulation of nervous system development (GO:0051960)	307	40	10.6	3.77	5.39e-09
neuron projection morphogenesis (GO:0048812)	543	55	18.75	2.93	6.72e-09
regulation of multicellular organismal development (GO:2000026)	511	53	17.65	3	7.29e-09
neuron projection development (GO:0031175)	561	56	19.37	2.89	7.32e-09
instar larval or pupal development (GO:0002165)	670	62	23.14	2.68	1.04e-08
cell projection organization (GO:0030030)	711	64	24.56	2.61	1.45e-08
regulation of neurogenesis (GO:0050767)	208	32	7.18	4.45	1.54e-08
response to external stimulus (GO:0009605)	918	75	31.7	2.37	1.72e-08
single organism signaling (GO:0044700)	1432	100	49.46	2.02	2.83e-08
signaling (GO:0023052)	1435	100	49.56	2.02	3.19e-08
central nervous system development (GO:0007417)	274	36	9.46	3.8	5.76e-08
post-embryonic development (GO:0009791)	737	64	25.45	2.51	6.46e-08
response to chemical (GO:0042221)	1024	79	35.36	2.23	6.89e-08
positive regulation of biological process (GO:0048518)	1338	94	46.21	2.03	1.01e-07
neuron recognition (GO:0008038)	104	22	3.59	6.13	1.06e-07
regulation of neuron differentiation (GO:0045664)	149	26	5.15	5.05	1.12e-07
cell recognition (GO:0008037)	106	22	3.66	6.01	1.51e-07
regulation of cell proliferation (GO:0042127)	202	30	6.98	4.3	1.67e-07
cell communication (GO:0007154)	1530	102	52.84	1.93	2.34e-07
regulation of cell development (GO:0060284)	261	34	9.01	3.77	2.65e-07
signal transduction (GO:0007165)	1072	79	37.02	2.13	5.92e-07
cell migration (GO:0016477)	278	34	9.6	3.54	1.33e-06
localization (GO:0051179)	2139	126	73.87	1.71	2.26e-06
positive regulation of cellular process (GO:0048522)	1168	81	40.34	2.01	5.55e-06
regulation of biological quality (GO:0065008)	1240	84	42.82	1.96	7.76e-06
gland development (GO:0048732)	227	29	7.84	3.7	1.02e-05
cellular component organization (GO:0016043)	2649	145	91.49	1.58	1.07e-05
respiratory system development (GO:0060541)	244	30	8.43	3.56	1.28e-05
cell motility (GO:0048870)	321	35	11.09	3.16	1.35e-05
regulation of growth (GO:0040008)	323	35	11.16	3.14	1.58e-05
open tracheal system development (GO:0007424)	232	29	8.01	3.62	1.64e-05
localization of cell (GO:0051674)	327	35	11.29	3.1	2.14e-05
cellular response to stimulus (GO:0051716)	1603	99	55.36	1.79	2.61e-05
biological_process (GO:0008150)	11315	438	390.78	1.12	3.08e-05
compound eye development (GO:0048749)	333	35	11.5	3.04	3.35e-05
eye development (GO:0001654)	352	36	12.16	2.96	4.07e-05
pattern specification process (GO:0007389)	493	44	17.03	2.58	5.15e-05
enzyme linked receptor protein signaling pathway (GO:0007167)	174	24	6.01	3.99	5.73e-05
transmembrane receptor protein tyrosine kinase signaling pathway (GO:0007169)	124	20	4.28	4.67	7.45e-05
reproductive system development (GO:0061458)	80	16	2.76	5.79	0.000109
reproductive structure development (GO:0048608)	80	16	2.76	5.79	0.000109
embryo development (GO:0009790)	507	44	17.51	2.51	0.000114
head development (GO:0060322)	154	22	5.32	4.14	0.000123
regionalization (GO:0003002)	455	41	15.71	2.61	0.000126
regulation of developmental growth (GO:0048638)	242	28	8.36	3.35	0.000149
brain development (GO:0007420)	130	20	4.49	4.45	0.000159
behavior (GO:0007610)	627	50	21.65	2.31	0.000175
cell surface receptor signaling pathway (GO:0007166)	445	40	15.37	2.6	0.000197
cellular component organization or biogenesis (GO:0071840)	2771	145	95.7	1.52	0.0002
motor neuron axon guidance (GO:0008045)	63	14	2.18	6.43	0.00022
sex differentiation (GO:0007548)	96	17	3.32	5.13	0.000228
protein autophosphorylation (GO:0046777)	38	11	1.31	8.38	0.000428
exocrine system development (GO:0035272)	181	23	6.25	3.68	0.000477
salivary gland development (GO:0007431)	181	23	6.25	3.68	0.000477
cellular process (GO:0009987)	6523	282	225.28	1.25	0.000579
developmental process involved in reproduction (GO:0003006)	856	59	29.56	2	0.00144
sensory organ development (GO:0007423)	465	39	16.06	2.43	0.00162
system process (GO:0003008)	726	52	25.07	2.07	0.00243
regulation of anatomical structure morphogenesis (GO:0022603)	300	29	10.36	2.8	0.0033
sensory organ morphogenesis (GO:0090596)	267	27	9.22	2.93	0.00339
eye morphogenesis (GO:0048592)	267	27	9.22	2.93	0.00339
regulation of anatomical structure size (GO:0090066)	223	24	7.7	3.12	0.00471
compound eye morphogenesis (GO:0001745)	256	26	8.84	2.94	0.00496
development of primary sexual characteristics (GO:0045137)	51	11	1.76	6.25	0.00731
gonad development (GO:0008406)	51	11	1.76	6.25	0.00731
regulation of cell projection organization (GO:0031344)	125	17	4.32	3.94	0.00818
embryonic morphogenesis (GO:0048598)	234	24	8.08	2.97	0.0106
cell adhesion (GO:0007155)	187	21	6.46	3.25	0.0112
homeostatic process (GO:0042592)	410	34	14.16	2.4	0.0112
anatomical structure formation involved in morphogenesis (GO:0048646)	527	40	18.2	2.2	0.0129
biological adhesion (GO:0022610)	190	21	6.56	3.2	0.0142
peptidyl-tyrosine autophosphorylation (GO:0038083)	12	6	0.41	14.48	0.0149
establishment of localization (GO:0051234)	1767	96	61.03	1.57	0.0151
regulation of dendrite development (GO:0050773)	56	11	1.93	5.69	0.0175
digestive tract morphogenesis (GO:0048546)	68	12	2.35	5.11	0.0194
regulation of cellular component organization (GO:0051128)	871	56	30.08	1.86	0.0227
cell-cell adhesion (GO:0098609)	94	14	3.25	4.31	0.0228
formation of anatomical boundary (GO:0048859)	47	10	1.62	6.16	0.0235
hindgut development (GO:0061525)	58	11	2	5.49	0.0243
hindgut morphogenesis (GO:0007442)	58	11	2	5.49	0.0243
transport (GO:0006810)	1698	92	58.64	1.57	0.0278
regulation of organ growth (GO:0046620)	59	11	2.04	5.4	0.0284
regulation of cell communication (GO:0010646)	815	53	28.15	1.88	0.0298
regulation of signaling (GO:0023051)	816	53	28.18	1.88	0.0308
positive regulation of developmental process (GO:0051094)	217	22	7.49	2.94	0.0321
peptidyl-tyrosine phosphorylation (GO:0018108)	21	7	0.73	9.65	0.0334
cognition (GO:0050890)	171	19	5.91	3.22	0.0373
learning or memory (GO:0007611)	171	19	5.91	3.22	0.0373
cell-cell adhesion via plasma-membrane adhesion molecules (GO:0098742)	61	11	2.11	5.22	0.0385
regulation of neuron projection development (GO:0010975)	99	14	3.42	4.09	0.0403
peptidyl-tyrosine modification (GO:0018212)	22	7	0.76	9.21	0.0449
homeostasis of number of cells (GO:0048872)	22	7	0.76	9.21	0.0449
epithelial cell migration (GO:0010631)	158	18	5.46	3.3	0.0454
embryonic hindgut morphogenesis (GO:0048619)	51	10	1.76	5.68	0.0471
epithelium migration (GO:0090132)	159	18	5.49	3.28	0.0493

## Sheet: S7B
GO biological process	Drosophila melanogaster - REFLIST (14217)	Input	Expected	Fold Enrichment	P-value
locomotion (GO:0040011)	638	116	41.69	2.78	3.87e-19
system development (GO:0048731)	2300	269	150.29	1.79	4.25e-19
single-multicellular organism process (GO:0044707)	3207	340	209.56	1.62	8.74e-19
anatomical structure morphogenesis (GO:0009653)	1674	214	109.39	1.96	1.86e-18
generation of neurons (GO:0048699)	942	146	61.55	2.37	2.08e-18
animal organ development (GO:0048513)	1323	182	86.45	2.11	2.83e-18
multicellular organismal process (GO:0032501)	4096	400	267.65	1.49	5.58e-17
neuron differentiation (GO:0030182)	799	128	52.21	2.45	7.41e-17
neuron development (GO:0048666)	698	116	45.61	2.54	3.75e-16
tissue morphogenesis (GO:0048729)	679	114	44.37	2.57	3.8e-16
morphogenesis of an epithelium (GO:0002009)	662	112	43.26	2.59	4.74e-16
regulation of multicellular organismal process (GO:0051239)	714	117	46.66	2.51	7.34e-16
animal organ morphogenesis (GO:0009887)	844	130	55.15	2.36	8.71e-16
tube development (GO:0035295)	786	123	51.36	2.39	2.76e-15
cell development (GO:0048468)	1484	187	96.97	1.93	6.95e-15
nervous system development (GO:0007399)	1617	198	105.66	1.87	1.07e-14
epithelial tube morphogenesis (GO:0060562)	542	96	35.42	2.71	1.34e-14
biological regulation (GO:0065007)	4001	384	261.44	1.47	1.46e-14
tube morphogenesis (GO:0035239)	574	99	37.51	2.64	2.17e-14
regulation of developmental process (GO:0050793)	745	116	48.68	2.38	4.41e-14
anatomical structure development (GO:0048856)	3207	322	209.56	1.54	1.01e-13
multicellular organism development (GO:0007275)	2888	297	188.71	1.57	1.54e-13
tissue development (GO:0009888)	1138	152	74.36	2.04	1.72e-13
regulation of biological process (GO:0050789)	3626	352	236.94	1.49	2.14e-13
developmental process (GO:0032502)	3361	332	219.62	1.51	2.59e-13
response to stimulus (GO:0050896)	2667	279	174.27	1.6	2.68e-13
epithelium development (GO:0060429)	1058	144	69.13	2.08	2.91e-13
cellular developmental process (GO:0048869)	2339	253	152.84	1.66	2.92e-13
axon development (GO:0061564)	314	67	20.52	3.27	3.7e-13
taxis (GO:0042330)	331	69	21.63	3.19	4e-13
single organism signaling (GO:0044700)	1432	177	93.57	1.89	4.49e-13
single-organism developmental process (GO:0044767)	3320	328	216.94	1.51	4.49e-13
signaling (GO:0023052)	1435	177	93.77	1.89	5.46e-13
imaginal disc development (GO:0007444)	644	103	42.08	2.45	6.33e-13
single-organism process (GO:0044699)	6094	522	398.21	1.31	7.3e-13
post-embryonic animal organ development (GO:0048569)	531	91	34.7	2.62	7.65e-13
movement of cell or subcellular component (GO:0006928)	666	105	43.52	2.41	8.01e-13
axonogenesis (GO:0007409)	305	65	19.93	3.26	1.14e-12
cell differentiation (GO:0030154)	2307	248	150.75	1.65	1.41e-12
cellular component morphogenesis (GO:0032989)	765	114	49.99	2.28	1.82e-12
post-embryonic animal organ morphogenesis (GO:0048563)	467	83	30.52	2.72	2.4e-12
imaginal disc morphogenesis (GO:0007560)	467	83	30.52	2.72	2.4e-12
regulation of cellular process (GO:0050794)	3352	327	219.03	1.49	3.22e-12
post-embryonic appendage morphogenesis (GO:0035120)	398	75	26.01	2.88	3.41e-12
imaginal disc-derived appendage morphogenesis (GO:0035114)	407	76	26.6	2.86	3.48e-12
single-organism cellular process (GO:0044763)	4391	402	286.93	1.4	4.16e-12
appendage morphogenesis (GO:0035107)	410	76	26.79	2.84	5.07e-12
neurogenesis (GO:0022008)	1463	176	95.6	1.84	6.75e-12
imaginal disc-derived appendage development (GO:0048737)	414	76	27.05	2.81	8.33e-12
cell morphogenesis (GO:0000902)	642	100	41.95	2.38	9.33e-12
cell communication (GO:0007154)	1530	181	99.98	1.81	1.14e-11
regulation of multicellular organismal development (GO:2000026)	511	86	33.39	2.58	1.47e-11
appendage development (GO:0048736)	419	76	27.38	2.78	1.53e-11
response to chemical (GO:0042221)	1024	136	66.91	2.03	1.56e-11
wing disc morphogenesis (GO:0007472)	359	69	23.46	2.94	1.98e-11
chemotaxis (GO:0006935)	269	58	17.58	3.3	2.87e-11
cell migration (GO:0016477)	278	59	18.17	3.25	3.27e-11
cell morphogenesis involved in differentiation (GO:0000904)	496	83	32.41	2.56	6.18e-11
cell morphogenesis involved in neuron differentiation (GO:0048667)	450	78	29.4	2.65	6.76e-11
imaginal disc-derived wing morphogenesis (GO:0007476)	351	67	22.94	2.92	6.82e-11
wing disc development (GO:0035220)	474	80	30.97	2.58	1.22e-10
neuron projection guidance (GO:0097485)	257	55	16.79	3.28	1.93e-10
regulation of cell differentiation (GO:0045595)	338	64	22.09	2.9	3.78e-10
cell projection morphogenesis (GO:0048858)	544	86	35.55	2.42	4.36e-10
cell part morphogenesis (GO:0032990)	556	87	36.33	2.39	5.38e-10
instar larval or pupal morphogenesis (GO:0048707)	566	88	36.98	2.38	5.46e-10
axon guidance (GO:0007411)	248	53	16.21	3.27	5.86e-10
neuron projection development (GO:0031175)	561	87	36.66	2.37	8.67e-10
localization (GO:0051179)	2139	224	139.77	1.6	9.96e-10
neuron recognition (GO:0008038)	104	33	6.8	4.86	1.01e-09
neuron projection morphogenesis (GO:0048812)	543	85	35.48	2.4	1.02e-09
cell recognition (GO:0008037)	106	33	6.93	4.76	1.67e-09
post-embryonic animal morphogenesis (GO:0009886)	578	88	37.77	2.33	1.67e-09
regulation of biological quality (GO:0065008)	1240	149	81.03	1.84	1.68e-09
signal transduction (GO:0007165)	1072	134	70.05	1.91	2.04e-09
response to external stimulus (GO:0009605)	918	120	59.99	2	2.27e-09
metamorphosis (GO:0007552)	592	89	38.68	2.3	2.4e-09
post-embryonic development (GO:0009791)	737	103	48.16	2.14	2.57e-09
cell motility (GO:0048870)	321	60	20.98	2.86	3.82e-09
regulation of nervous system development (GO:0051960)	307	58	20.06	2.89	6.02e-09
localization of cell (GO:0051674)	327	60	21.37	2.81	8.04e-09
cell projection organization (GO:0030030)	711	99	46.46	2.13	9.19e-09
instar larval or pupal development (GO:0002165)	670	95	43.78	2.17	9.87e-09
positive regulation of biological process (GO:0048518)	1338	154	87.43	1.76	1.69e-08
behavior (GO:0007610)	627	90	40.97	2.2	2.04e-08
regulation of neurogenesis (GO:0050767)	208	43	13.59	3.16	3.12e-07
compound eye development (GO:0048749)	333	57	21.76	2.62	3.84e-07
regulation of cell development (GO:0060284)	261	49	17.05	2.87	3.97e-07
regulation of neuron differentiation (GO:0045664)	149	35	9.74	3.59	6.77e-07
eye development (GO:0001654)	352	58	23	2.52	1.07e-06
positive regulation of cellular process (GO:0048522)	1168	133	76.32	1.74	1.22e-06
respiratory system development (GO:0060541)	244	46	15.94	2.89	1.29e-06
open tracheal system development (GO:0007424)	232	44	15.16	2.9	2.6e-06
system process (GO:0003008)	726	93	47.44	1.96	3.08e-06
embryo development (GO:0009790)	507	72	33.13	2.17	4.59e-06
central nervous system development (GO:0007417)	274	48	17.9	2.68	5.55e-06
epithelial cell migration (GO:0010631)	158	34	10.32	3.29	1.07e-05
cellular response to stimulus (GO:0051716)	1603	165	104.75	1.58	1.07e-05
epithelium migration (GO:0090132)	159	34	10.39	3.27	1.25e-05
cellular component organization (GO:0016043)	2649	245	173.1	1.42	1.33e-05
cell-cell signaling (GO:0007267)	500	70	32.67	2.14	1.38e-05
compound eye morphogenesis (GO:0001745)	256	45	16.73	2.69	1.62e-05
sensory organ morphogenesis (GO:0090596)	267	46	17.45	2.64	1.99e-05
eye morphogenesis (GO:0048592)	267	46	17.45	2.64	1.99e-05
cognition (GO:0050890)	171	35	11.17	3.13	2.18e-05
learning or memory (GO:0007611)	171	35	11.17	3.13	2.18e-05
sensory organ development (GO:0007423)	465	66	30.39	2.17	2.32e-05
gland development (GO:0048732)	227	41	14.83	2.76	3.73e-05
tissue migration (GO:0090130)	167	34	10.91	3.12	4.06e-05
pattern specification process (GO:0007389)	493	68	32.21	2.11	4.08e-05
regulation of growth (GO:0040008)	323	51	21.11	2.42	4.89e-05
regionalization (GO:0003002)	455	64	29.73	2.15	5.47e-05
cell surface receptor signaling pathway (GO:0007166)	445	63	29.08	2.17	5.63e-05
ameboidal-type cell migration (GO:0001667)	171	34	11.17	3.04	7.1e-05
establishment of localization (GO:0051234)	1767	174	115.46	1.51	8.25e-05
cell fate commitment (GO:0045165)	471	65	30.78	2.11	8.46e-05
cellular process (GO:0009987)	6523	509	426.24	1.19	0.000101
transport (GO:0006810)	1698	168	110.95	1.51	0.000112
cellular component organization or biogenesis (GO:0071840)	2771	249	181.07	1.38	0.000123
neurological system process (GO:0050877)	661	82	43.19	1.9	0.000126
regulation of cell proliferation (GO:0042127)	202	37	13.2	2.8	0.000135
single-organism behavior (GO:0044708)	438	61	28.62	2.13	0.000168
photoreceptor cell differentiation (GO:0046530)	169	33	11.04	2.99	0.000172
regulation of developmental growth (GO:0048638)	242	41	15.81	2.59	0.000205
motor neuron axon guidance (GO:0008045)	63	19	4.12	4.62	0.000221
synaptic target recognition (GO:0008039)	45	16	2.94	5.44	0.000271
enzyme linked receptor protein signaling pathway (GO:0007167)	174	33	11.37	2.9	0.000332
heart development (GO:0007507)	102	24	6.67	3.6	0.000437
circulatory system development (GO:0072359)	102	24	6.67	3.6	0.000437
anatomical structure formation involved in morphogenesis (GO:0048646)	527	68	34.44	1.97	0.000476
embryonic morphogenesis (GO:0048598)	234	39	15.29	2.55	0.000642
transmembrane receptor protein tyrosine kinase signaling pathway (GO:0007169)	124	26	8.1	3.21	0.00118
developmental process involved in reproduction (GO:0003006)	856	95	55.93	1.7	0.00158
cell adhesion (GO:0007155)	187	33	12.22	2.7	0.00162
reproductive process (GO:0022414)	1238	126	80.9	1.56	0.00189
leg disc development (GO:0035218)	103	23	6.73	3.42	0.00191
sex differentiation (GO:0007548)	96	22	6.27	3.51	0.00219
eye photoreceptor cell differentiation (GO:0001754)	154	29	10.06	2.88	0.00222
biological adhesion (GO:0022610)	190	33	12.42	2.66	0.00227
positive regulation of nucleobase-containing compound metabolic process (GO:0045935)	401	54	26.2	2.06	0.00268
biological_process (GO:0008150)	11315	796	739.37	1.08	0.00306
compound eye photoreceptor cell differentiation (GO:0001751)	150	28	9.8	2.86	0.00404
memory (GO:0007613)	116	24	7.58	3.17	0.00409
oogenesis (GO:0048477)	641	75	41.89	1.79	0.00426
positive regulation of nitrogen compound metabolic process (GO:0051173)	642	75	41.95	1.79	0.0045
establishment of ommatidial planar polarity (GO:0042067)	63	17	4.12	4.13	0.00473
multi-organism process (GO:0051704)	1442	140	94.23	1.49	0.00536
female gamete generation (GO:0007292)	704	80	46	1.74	0.0056
cell-cell adhesion (GO:0098609)	94	21	6.14	3.42	0.00577
cellular process involved in reproduction in multicellular organism (GO:0022412)	848	92	55.41	1.66	0.00614
exocrine system development (GO:0035272)	181	31	11.83	2.62	0.00647
salivary gland development (GO:0007431)	181	31	11.83	2.62	0.00647
morphogenesis of a branching structure (GO:0001763)	72	18	4.7	3.83	0.00676
establishment of tissue polarity (GO:0007164)	95	21	6.21	3.38	0.00678
establishment of planar polarity (GO:0001736)	95	21	6.21	3.38	0.00678
positive regulation of RNA biosynthetic process (GO:1902680)	361	49	23.59	2.08	0.00695
positive regulation of transcription, DNA-templated (GO:0045893)	361	49	23.59	2.08	0.00695
positive regulation of nucleic acid-templated transcription (GO:1903508)	361	49	23.59	2.08	0.00695
reproduction (GO:0000003)	1437	139	93.9	1.48	0.00713
positive regulation of RNA metabolic process (GO:0051254)	372	50	24.31	2.06	0.00718
reproductive system development (GO:0061458)	80	19	5.23	3.63	0.00743
reproductive structure development (GO:0048608)	80	19	5.23	3.63	0.00743
ovarian follicle cell development (GO:0030707)	321	45	20.98	2.15	0.00799
columnar/cuboidal epithelial cell development (GO:0002066)	322	45	21.04	2.14	0.00864
brain development (GO:0007420)	130	25	8.49	2.94	0.00885
multicellular organismal reproductive process (GO:0048609)	1126	114	73.58	1.55	0.00886
homeostatic process (GO:0042592)	410	53	26.79	1.98	0.0108
multi-organism reproductive process (GO:0044703)	1132	114	73.97	1.54	0.0113
sexual reproduction (GO:0019953)	1132	114	73.97	1.54	0.0113
morphogenesis of a polarized epithelium (GO:0001738)	107	22	6.99	3.15	0.0123
regulation of cell communication (GO:0010646)	815	88	53.26	1.65	0.0125
regulation of signaling (GO:0023051)	816	88	53.32	1.65	0.0131
cell-cell adhesion via plasma-membrane adhesion molecules (GO:0098742)	61	16	3.99	4.01	0.0135
renal system development (GO:0072001)	76	18	4.97	3.62	0.0141
urogenital system development (GO:0001655)	76	18	4.97	3.62	0.0141
ventral cord development (GO:0007419)	84	19	5.49	3.46	0.0148
establishment or maintenance of cell polarity (GO:0007163)	208	33	13.59	2.43	0.015
branching morphogenesis of an epithelial tube (GO:0048754)	69	17	4.51	3.77	0.0155
morphogenesis of a branching epithelium (GO:0061138)	69	17	4.51	3.77	0.0155
branching involved in open tracheal system development (GO:0060446)	69	17	4.51	3.77	0.0155
columnar/cuboidal epithelial cell differentiation (GO:0002065)	330	45	21.56	2.09	0.016
regulation of RNA metabolic process (GO:0051252)	1079	109	70.51	1.55	0.0165
regulation of anatomical structure morphogenesis (GO:0022603)	300	42	19.6	2.14	0.0177
regulation of cellular component organization (GO:0051128)	871	92	56.91	1.62	0.0177
positive regulation of cellular metabolic process (GO:0031325)	669	75	43.72	1.72	0.019
negative regulation of biological process (GO:0048519)	1272	124	83.12	1.49	0.019
head development (GO:0060322)	154	27	10.06	2.68	0.0191
photoreceptor cell development (GO:0042461)	102	21	6.67	3.15	0.0198
regulation of nucleobase-containing compound metabolic process (GO:0019219)	1134	113	74.1	1.52	0.02
single organism reproductive process (GO:0044702)	1059	107	69.2	1.55	0.0201
ovarian follicle cell migration (GO:0007297)	129	24	8.43	2.85	0.0238
regulation of localization (GO:0032879)	400	51	26.14	1.95	0.0238
synapse organization (GO:0050808)	166	28	10.85	2.58	0.0261
regulation of cell fate commitment (GO:0010453)	37	12	2.42	4.96	0.027
regulation of RNA biosynthetic process (GO:2001141)	992	101	64.82	1.56	0.0275
regulation of transcription, DNA-templated (GO:0006355)	992	101	64.82	1.56	0.0275
regulation of nucleic acid-templated transcription (GO:1903506)	992	101	64.82	1.56	0.0275
positive regulation of cellular biosynthetic process (GO:0031328)	447	55	29.21	1.88	0.0286
positive regulation of biosynthetic process (GO:0009891)	447	55	29.21	1.88	0.0286
multicellular organism reproduction (GO:0032504)	1322	127	86.39	1.47	0.0288
negative regulation of multicellular organismal process (GO:0051241)	186	30	12.15	2.47	0.0294
growth (GO:0040007)	196	31	12.81	2.42	0.0306
embryonic development via the syncytial blastoderm (GO:0001700)	177	29	11.57	2.51	0.031
positive regulation of metabolic process (GO:0009893)	703	77	45.94	1.68	0.0317
development of primary sexual characteristics (GO:0045137)	51	14	3.33	4.2	0.032
gonad development (GO:0008406)	51	14	3.33	4.2	0.032
regulation of transcription from RNA polymerase II promoter (GO:0006357)	574	66	37.51	1.76	0.032
negative regulation of developmental process (GO:0051093)	197	31	12.87	2.41	0.0337
protein autophosphorylation (GO:0046777)	38	12	2.48	4.83	0.035
positive regulation of macromolecule metabolic process (GO:0010604)	635	71	41.49	1.71	0.0367
developmental growth (GO:0048589)	170	28	11.11	2.52	0.0399
epithelial cell development (GO:0002064)	354	46	23.13	1.99	0.0417
regulation of neuron projection development (GO:0010975)	99	20	6.47	3.09	0.0425
regulation of cell projection organization (GO:0031344)	125	23	8.17	2.82	0.0434
germ cell development (GO:0007281)	758	81	49.53	1.64	0.0441
developmental growth involved in morphogenesis (GO:0060560)	75	17	4.9	3.47	0.0446
protein phosphorylation (GO:0006468)	281	39	18.36	2.12	0.0457
negative regulation of cell differentiation (GO:0045596)	117	22	7.65	2.88	0.0479
muscle structure development (GO:0061061)	251	36	16.4	2.19	0.0491
regulation of cell fate specification (GO:0042659)	33	11	2.16	5.1	0.0493

## Sheet: S7C
GO biological process	Drosophila melanogaster - REFLIST (14217)	Input	Expected	Fold Enrichment	P-value
neuron differentiation (GO:0030182)	799	93	29.67	3.13	6.71e-19
generation of neurons (GO:0048699)	942	99	34.98	2.83	3.06e-17
single-multicellular organism process (GO:0044707)	3207	213	119.1	1.79	1.58e-16
system development (GO:0048731)	2300	169	85.42	1.98	6.93e-16
developmental process (GO:0032502)	3361	217	124.82	1.74	1.72e-15
cell differentiation (GO:0030154)	2307	168	85.68	1.96	2.29e-15
anatomical structure morphogenesis (GO:0009653)	1674	136	62.17	2.19	2.76e-15
animal organ morphogenesis (GO:0009887)	844	89	31.35	2.84	3.21e-15
anatomical structure development (GO:0048856)	3207	209	119.1	1.75	4.43e-15
single-organism developmental process (GO:0044767)	3320	214	123.3	1.74	4.52e-15
cellular developmental process (GO:0048869)	2339	168	86.87	1.93	8.9e-15
single-organism process (GO:0044699)	6094	325	226.32	1.44	1.46e-14
neuron development (GO:0048666)	698	78	25.92	3.01	2.61e-14
multicellular organismal process (GO:0032501)	4096	244	152.12	1.6	6.43e-14
multicellular organism development (GO:0007275)	2888	191	107.26	1.78	8.34e-14
cell development (GO:0048468)	1484	122	55.11	2.21	1.27e-13
nervous system development (GO:0007399)	1617	128	60.05	2.13	3.18e-13
animal organ development (GO:0048513)	1323	112	49.13	2.28	4.71e-13
neurogenesis (GO:0022008)	1463	116	54.33	2.13	1.22e-11
tissue development (GO:0009888)	1138	98	42.26	2.32	2.05e-11
tube development (GO:0035295)	786	77	29.19	2.64	4.57e-11
single-organism cellular process (GO:0044763)	4391	247	163.08	1.51	4.93e-11
locomotion (GO:0040011)	638	67	23.69	2.83	1.27e-10
post-embryonic animal organ development (GO:0048569)	531	60	19.72	3.04	1.47e-10
imaginal disc-derived appendage development (GO:0048737)	414	52	15.38	3.38	1.58e-10
epithelium development (GO:0060429)	1058	91	39.29	2.32	2.48e-10
appendage development (GO:0048736)	419	52	15.56	3.34	2.49e-10
epithelial tube morphogenesis (GO:0060562)	542	60	20.13	2.98	3.49e-10
post-embryonic animal organ morphogenesis (GO:0048563)	467	55	17.34	3.17	3.63e-10
imaginal disc morphogenesis (GO:0007560)	467	55	17.34	3.17	3.63e-10
tube morphogenesis (GO:0035239)	574	62	21.32	2.91	3.77e-10
regulation of biological process (GO:0050789)	3626	211	134.66	1.57	7.99e-10
sensory organ development (GO:0007423)	465	54	17.27	3.13	1.06e-09
imaginal disc-derived appendage morphogenesis (GO:0035114)	407	50	15.12	3.31	1.12e-09
biological regulation (GO:0065007)	4001	226	148.59	1.52	1.33e-09
appendage morphogenesis (GO:0035107)	410	50	15.23	3.28	1.46e-09
post-embryonic appendage morphogenesis (GO:0035120)	398	49	14.78	3.32	1.81e-09
imaginal disc development (GO:0007444)	644	65	23.92	2.72	1.82e-09
tissue morphogenesis (GO:0048729)	679	67	25.22	2.66	2.11e-09
movement of cell or subcellular component (GO:0006928)	666	66	24.73	2.67	2.65e-09
regulation of cellular process (GO:0050794)	3352	197	124.49	1.58	3.66e-09
metamorphosis (GO:0007552)	592	61	21.99	2.77	4.32e-09
cell projection organization (GO:0030030)	711	68	26.41	2.58	5.63e-09
morphogenesis of an epithelium (GO:0002009)	662	65	24.59	2.64	5.99e-09
instar larval or pupal morphogenesis (GO:0048707)	566	59	21.02	2.81	6.56e-09
axon development (GO:0061564)	314	42	11.66	3.6	6.81e-09
wing disc development (GO:0035220)	474	53	17.6	3.01	7.34e-09
post-embryonic animal morphogenesis (GO:0009886)	578	59	21.47	2.75	1.51e-08
imaginal disc-derived wing morphogenesis (GO:0007476)	351	44	13.04	3.38	1.64e-08
wing disc morphogenesis (GO:0007472)	359	44	13.33	3.3	3.37e-08
single organism signaling (GO:0044700)	1432	105	53.18	1.97	3.93e-08
axonogenesis (GO:0007409)	305	40	11.33	3.53	4.18e-08
compound eye development (GO:0048749)	333	42	12.37	3.4	4.22e-08
signaling (GO:0023052)	1435	105	53.29	1.97	4.44e-08
cellular component morphogenesis (GO:0032989)	765	69	28.41	2.43	5.07e-08
biological_process (GO:0008150)	11315	477	420.22	1.14	6.44e-08
eye development (GO:0001654)	352	43	13.07	3.29	6.48e-08
compound eye morphogenesis (GO:0001745)	256	36	9.51	3.79	6.91e-08
post-embryonic development (GO:0009791)	737	67	27.37	2.45	7.41e-08
cell communication (GO:0007154)	1530	109	56.82	1.92	8.08e-08
taxis (GO:0042330)	331	41	12.29	3.34	1.28e-07
sensory organ morphogenesis (GO:0090596)	267	36	9.92	3.63	2.16e-07
eye morphogenesis (GO:0048592)	267	36	9.92	3.63	2.16e-07
instar larval or pupal development (GO:0002165)	670	62	24.88	2.49	2.22e-07
signal transduction (GO:0007165)	1072	84	39.81	2.11	2.9e-07
cellular process (GO:0009987)	6523	315	242.26	1.3	4.57e-07
regulation of biological quality (GO:0065008)	1240	92	46.05	2	5.36e-07
chemotaxis (GO:0006935)	269	35	9.99	3.5	1.01e-06
cell morphogenesis involved in differentiation (GO:0000904)	496	50	18.42	2.71	1.09e-06
axon guidance (GO:0007411)	248	33	9.21	3.58	1.89e-06
response to chemical (GO:0042221)	1024	79	38.03	2.08	2.34e-06
neuron projection development (GO:0031175)	561	53	20.83	2.54	2.96e-06
cell morphogenesis involved in neuron differentiation (GO:0048667)	450	46	16.71	2.75	3.77e-06
neuron projection guidance (GO:0097485)	257	33	9.54	3.46	4.51e-06
eye photoreceptor cell differentiation (GO:0001754)	154	25	5.72	4.37	5.1e-06
cell morphogenesis (GO:0000902)	642	57	23.84	2.39	6.12e-06
regulation of multicellular organismal process (GO:0051239)	714	61	26.52	2.3	6.64e-06
photoreceptor cell differentiation (GO:0046530)	169	26	6.28	4.14	7.19e-06
neuron projection morphogenesis (GO:0048812)	543	51	20.17	2.53	7.59e-06
cell projection morphogenesis (GO:0048858)	544	51	20.2	2.52	8.06e-06
cell adhesion (GO:0007155)	187	27	6.94	3.89	1.33e-05
compound eye photoreceptor cell differentiation (GO:0001751)	150	24	5.57	4.31	1.42e-05
cell-cell adhesion (GO:0098609)	94	19	3.49	5.44	1.56e-05
cell part morphogenesis (GO:0032990)	556	51	20.65	2.47	1.63e-05
biological adhesion (GO:0022610)	190	27	7.06	3.83	1.84e-05
regulation of cell communication (GO:0010646)	815	65	30.27	2.15	2.64e-05
regulation of signaling (GO:0023051)	816	65	30.31	2.14	2.77e-05
regulation of growth (GO:0040008)	323	36	12	3	3.05e-05
eye photoreceptor cell development (GO:0042462)	88	18	3.27	5.51	3.31e-05
photoreceptor cell development (GO:0042461)	102	19	3.79	5.02	5.63e-05
respiratory system development (GO:0060541)	244	30	9.06	3.31	6.56e-05
regulation of developmental process (GO:0050793)	745	60	27.67	2.17	7.46e-05
R7 cell development (GO:0045467)	23	10	0.85	11.71	7.6e-05
open tracheal system development (GO:0007424)	232	29	8.62	3.37	7.98e-05
compound eye photoreceptor development (GO:0042051)	86	17	3.19	5.32	0.000137
developmental process involved in reproduction (GO:0003006)	856	65	31.79	2.04	0.000161
response to stimulus (GO:0050896)	2667	149	99.05	1.5	0.000255
cellular component organization (GO:0016043)	2649	148	98.38	1.5	0.000287
cell fate commitment (GO:0045165)	471	43	17.49	2.46	0.000313
cell-cell adhesion via plasma-membrane adhesion molecules (GO:0098742)	61	14	2.27	6.18	0.000361
neuron recognition (GO:0008038)	104	18	3.86	4.66	0.000389
anatomical structure formation involved in morphogenesis (GO:0048646)	527	46	19.57	2.35	0.000395
muscle structure development (GO:0061061)	251	29	9.32	3.11	0.00041
cell recognition (GO:0008037)	106	18	3.94	4.57	0.000512
oogenesis (GO:0048477)	641	52	23.81	2.18	0.000553
behavior (GO:0007610)	627	51	23.29	2.19	0.000676
R7 cell differentiation (GO:0045466)	46	12	1.71	7.02	0.00076
female gamete generation (GO:0007292)	704	55	26.15	2.1	0.000783
cell motility (GO:0048870)	321	33	11.92	2.77	0.000784
cellular component organization or biogenesis (GO:0071840)	2771	151	102.91	1.47	0.000953
cell migration (GO:0016477)	278	30	10.32	2.91	0.00103
pattern specification process (GO:0007389)	493	43	18.31	2.35	0.00106
localization of cell (GO:0051674)	327	33	12.14	2.72	0.00118
heart development (GO:0007507)	102	17	3.79	4.49	0.00145
circulatory system development (GO:0072359)	102	17	3.79	4.49	0.00145
germ cell development (GO:0007281)	758	57	28.15	2.02	0.00157
reproductive process (GO:0022414)	1238	81	45.98	1.76	0.00162
cell fate determination (GO:0001709)	143	20	5.31	3.77	0.00219
regulation of cell differentiation (GO:0045595)	338	33	12.55	2.63	0.00241
epithelial cell migration (GO:0010631)	158	21	5.87	3.58	0.00259
regulation of multicellular organismal development (GO:2000026)	511	43	18.98	2.27	0.00267
epithelium migration (GO:0090132)	159	21	5.91	3.56	0.00286
establishment of ommatidial planar polarity (GO:0042067)	63	13	2.34	5.56	0.00328
regulation of response to stimulus (GO:0048583)	919	64	34.13	1.88	0.00401
actomyosin structure organization (GO:0031032)	75	14	2.79	5.03	0.00407
synaptic target recognition (GO:0008039)	45	11	1.67	6.58	0.00447
establishment or maintenance of cell polarity (GO:0007163)	208	24	7.72	3.11	0.00506
synapse organization (GO:0050808)	166	21	6.17	3.41	0.00558
regulation of signal transduction (GO:0009966)	713	53	26.48	2	0.00567
regionalization (GO:0003002)	455	39	16.9	2.31	0.0057
tissue migration (GO:0090130)	167	21	6.2	3.39	0.00612
actin filament-based process (GO:0030029)	257	27	9.54	2.83	0.00654
cardiocyte differentiation (GO:0035051)	22	8	0.82	9.79	0.00711
negative regulation of biological process (GO:0048519)	1272	80	47.24	1.69	0.00867
ameboidal-type cell migration (GO:0001667)	171	21	6.35	3.31	0.00879
multicellular organismal reproductive process (GO:0048609)	1126	73	41.82	1.75	0.00886
modulation of synaptic transmission (GO:0050804)	105	16	3.9	4.1	0.00973
multi-organism reproductive process (GO:0044703)	1132	73	42.04	1.74	0.0107
sexual reproduction (GO:0019953)	1132	73	42.04	1.74	0.0107
cellular process involved in reproduction in multicellular organism (GO:0022412)	848	59	31.49	1.87	0.0111
epithelial cell differentiation (GO:0030855)	404	35	15	2.33	0.0155
actin cytoskeleton organization (GO:0030036)	238	25	8.84	2.83	0.0156
response to external stimulus (GO:0009605)	918	62	34.09	1.82	0.0156
ommatidial rotation (GO:0016318)	33	9	1.23	7.34	0.0169
motor neuron axon guidance (GO:0008045)	63	12	2.34	5.13	0.0188
regulation of developmental growth (GO:0048638)	242	25	8.99	2.78	0.0206
central nervous system development (GO:0007417)	274	27	10.18	2.65	0.0207
homeostatic process (GO:0042592)	410	35	15.23	2.3	0.0211
homophilic cell adhesion via plasma membrane adhesion molecules (GO:0007156)	34	9	1.26	7.13	0.0215
negative regulation of cell communication (GO:0010648)	291	28	10.81	2.59	0.0216
negative regulation of signaling (GO:0023057)	291	28	10.81	2.59	0.0216
anterior Malpighian tubule development (GO:0061327)	12	6	0.45	13.46	0.0225
myofibril assembly (GO:0030239)	44	10	1.63	6.12	0.025
axon extension (GO:0048675)	35	9	1.3	6.92	0.027
developmental growth (GO:0048589)	170	20	6.31	3.17	0.028
developmental cell growth (GO:0048588)	55	11	2.04	5.39	0.0292
ovarian follicle cell migration (GO:0007297)	129	17	4.79	3.55	0.0316
cellular response to stimulus (GO:0051716)	1603	93	59.53	1.56	0.0325
neuron projection extension (GO:1990138)	36	9	1.34	6.73	0.0336
regulation of cellular component biogenesis (GO:0044087)	282	27	10.47	2.58	0.0343
muscle cell differentiation (GO:0042692)	118	16	4.38	3.65	0.0407
reproduction (GO:0000003)	1437	85	53.37	1.59	0.0416
striated muscle cell development (GO:0055002)	58	11	2.15	5.11	0.0474
cell surface receptor signaling pathway (GO:0007166)	445	36	16.53	2.18	0.0488
border follicle cell migration (GO:0007298)	120	16	4.46	3.59	0.0498

## Sheet: S7D
GO biological process	Drosophila melanogaster - REFLIST (14217)	Input	Expected	Fold Enrichment	P-value
generation of neurons (GO:0048699)	942	104	38.63	2.69	1.5e-16
neuron differentiation (GO:0030182)	799	92	32.76	2.81	2.23e-15
neuron development (GO:0048666)	698	82	28.62	2.86	7.5e-14
system development (GO:0048731)	2300	173	94.32	1.83	9.84e-13
single-multicellular organism process (GO:0044707)	3207	218	131.51	1.66	1.48e-12
cell projection organization (GO:0030030)	711	79	29.16	2.71	6.2e-12
multicellular organism development (GO:0007275)	2888	199	118.43	1.68	1.71e-11
nervous system development (GO:0007399)	1617	131	66.31	1.98	7.23e-11
anatomical structure development (GO:0048856)	3207	212	131.51	1.61	1.01e-10
animal organ morphogenesis (GO:0009887)	844	85	34.61	2.46	1.09e-10
anatomical structure morphogenesis (GO:0009653)	1674	133	68.65	1.94	1.83e-10
axon development (GO:0061564)	314	47	12.88	3.65	2.18e-10
developmental process (GO:0032502)	3361	218	137.83	1.58	2.53e-10
single-organism developmental process (GO:0044767)	3320	216	136.14	1.59	2.62e-10
axonogenesis (GO:0007409)	305	46	12.51	3.68	3.13e-10
morphogenesis of an epithelium (GO:0002009)	662	72	27.15	2.65	3.5e-10
neuron projection development (GO:0031175)	561	65	23.01	2.83	3.93e-10
cell morphogenesis involved in neuron differentiation (GO:0048667)	450	57	18.45	3.09	4.22e-10
neurogenesis (GO:0022008)	1463	120	59.99	2	5.33e-10
multicellular organismal process (GO:0032501)	4096	251	167.97	1.49	5.5e-10
response to chemical (GO:0042221)	1024	94	41.99	2.24	8.54e-10
cell projection morphogenesis (GO:0048858)	544	63	22.31	2.82	9.88e-10
tissue morphogenesis (GO:0048729)	679	72	27.84	2.59	1.16e-09
taxis (GO:0042330)	331	47	13.57	3.46	1.37e-09
cell development (GO:0048468)	1484	120	60.85	1.97	1.39e-09
single organism signaling (GO:0044700)	1432	117	58.72	1.99	1.51e-09
signaling (GO:0023052)	1435	117	58.85	1.99	1.73e-09
cell part morphogenesis (GO:0032990)	556	63	22.8	2.76	2.5e-09
neuron projection morphogenesis (GO:0048812)	543	62	22.27	2.78	2.8e-09
locomotion (GO:0040011)	638	68	26.16	2.6	4.46e-09
response to stimulus (GO:0050896)	2667	180	109.37	1.65	4.68e-09
cell communication (GO:0007154)	1530	121	62.74	1.93	4.78e-09
cell morphogenesis involved in differentiation (GO:0000904)	496	58	20.34	2.85	6.32e-09
tube morphogenesis (GO:0035239)	574	63	23.54	2.68	9.54e-09
animal organ development (GO:0048513)	1323	108	54.25	1.99	1.57e-08
cell morphogenesis (GO:0000902)	642	67	26.33	2.54	1.66e-08
chemotaxis (GO:0006935)	269	40	11.03	3.63	2.05e-08
epithelial tube morphogenesis (GO:0060562)	542	60	22.23	2.7	2.33e-08
imaginal disc-derived appendage development (GO:0048737)	414	51	16.98	3	2.37e-08
epithelium development (GO:0060429)	1058	92	43.39	2.12	3.05e-08
regulation of cellular process (GO:0050794)	3352	210	137.46	1.53	3.19e-08
appendage development (GO:0048736)	419	51	17.18	2.97	3.63e-08
imaginal disc-derived appendage morphogenesis (GO:0035114)	407	50	16.69	3	4.24e-08
appendage morphogenesis (GO:0035107)	410	50	16.81	2.97	5.46e-08
post-embryonic animal organ morphogenesis (GO:0048563)	467	54	19.15	2.82	5.79e-08
imaginal disc morphogenesis (GO:0007560)	467	54	19.15	2.82	5.79e-08
post-embryonic appendage morphogenesis (GO:0035120)	398	49	16.32	3	6.37e-08
neuron recognition (GO:0008038)	104	24	4.26	5.63	8.01e-08
cellular component morphogenesis (GO:0032989)	765	73	31.37	2.33	1.01e-07
cell recognition (GO:0008037)	106	24	4.35	5.52	1.17e-07
tissue development (GO:0009888)	1138	95	46.67	2.04	1.2e-07
cell differentiation (GO:0030154)	2307	157	94.6	1.66	1.35e-07
imaginal disc development (GO:0007444)	644	65	26.41	2.46	1.41e-07
regulation of biological process (GO:0050789)	3626	220	148.69	1.48	1.67e-07
cellular developmental process (GO:0048869)	2339	158	95.92	1.65	1.99e-07
regulation of developmental process (GO:0050793)	745	71	30.55	2.32	2.06e-07
regulation of multicellular organismal process (GO:0051239)	714	69	29.28	2.36	2.19e-07
wing disc morphogenesis (GO:0007472)	359	45	14.72	3.06	2.48e-07
post-embryonic animal organ development (GO:0048569)	531	57	21.77	2.62	2.56e-07
metamorphosis (GO:0007552)	592	61	24.28	2.51	2.65e-07
tube development (GO:0035295)	786	73	32.23	2.26	3.36e-07
imaginal disc-derived wing morphogenesis (GO:0007476)	351	44	14.39	3.06	4.05e-07
regulation of cell differentiation (GO:0045595)	338	43	13.86	3.1	4.24e-07
regulation of anatomical structure morphogenesis (GO:0022603)	300	40	12.3	3.25	5.01e-07
single-organism process (GO:0044699)	6094	326	249.9	1.3	5.09e-07
biological regulation (GO:0065007)	4001	235	164.07	1.43	5.68e-07
signal transduction (GO:0007165)	1072	89	43.96	2.02	7.31e-07
sensory organ development (GO:0007423)	465	51	19.07	2.67	1.31e-06
movement of cell or subcellular component (GO:0006928)	666	64	27.31	2.34	1.43e-06
cell adhesion (GO:0007155)	187	30	7.67	3.91	1.65e-06
axon guidance (GO:0007411)	248	35	10.17	3.44	1.69e-06
response to external stimulus (GO:0009605)	918	79	37.64	2.1	1.78e-06
biological adhesion (GO:0022610)	190	30	7.79	3.85	2.37e-06
wing disc development (GO:0035220)	474	51	19.44	2.62	2.49e-06
instar larval or pupal morphogenesis (GO:0048707)	566	57	23.21	2.46	2.63e-06
regulation of multicellular organismal development (GO:2000026)	511	53	20.95	2.53	3.98e-06
neuron projection guidance (GO:0097485)	257	35	10.54	3.32	4.2e-06
post-embryonic animal morphogenesis (GO:0009886)	578	57	23.7	2.4	5.55e-06
cell-cell adhesion (GO:0098609)	94	20	3.85	5.19	1.4e-05
behavior (GO:0007610)	627	59	25.71	2.29	1.53e-05
regulation of cell communication (GO:0010646)	815	70	33.42	2.09	2.06e-05
regulation of cell development (GO:0060284)	261	34	10.7	3.18	2.14e-05
regulation of signaling (GO:0023051)	816	70	33.46	2.09	2.17e-05
instar larval or pupal development (GO:0002165)	670	61	27.47	2.22	2.72e-05
cell-cell adhesion via plasma-membrane adhesion molecules (GO:0098742)	61	16	2.5	6.4	2.89e-05
compound eye development (GO:0048749)	333	39	13.66	2.86	2.91e-05
synaptic target recognition (GO:0008039)	45	14	1.85	7.59	3.02e-05
cell-cell signaling (GO:0007267)	500	50	20.5	2.44	3.79e-05
cell surface receptor signaling pathway (GO:0007166)	445	46	18.25	2.52	5.7e-05
post-embryonic development (GO:0009791)	737	64	30.22	2.12	6.56e-05
gliogenesis (GO:0042063)	77	17	3.16	5.38	0.000118
eye development (GO:0001654)	352	39	14.43	2.7	0.000124
compound eye morphogenesis (GO:0001745)	256	32	10.5	3.05	0.000151
single-organism cellular process (GO:0044763)	4391	241	180.06	1.34	0.000194
regulation of signal transduction (GO:0009966)	713	61	29.24	2.09	0.000241
regulation of nervous system development (GO:0051960)	307	35	12.59	2.78	0.00032
regulation of neuron differentiation (GO:0045664)	149	23	6.11	3.76	0.000336
sensory organ morphogenesis (GO:0090596)	267	32	10.95	2.92	0.000383
eye morphogenesis (GO:0048592)	267	32	10.95	2.92	0.000383
cellular component organization (GO:0016043)	2649	160	108.63	1.47	0.000398
respiratory system development (GO:0060541)	244	30	10.01	3	0.00056
open tracheal system development (GO:0007424)	232	29	9.51	3.05	0.000642
regulation of neurogenesis (GO:0050767)	208	27	8.53	3.17	0.000822
cellular component organization or biogenesis (GO:0071840)	2771	164	113.63	1.44	0.00097
regulation of cell morphogenesis (GO:0022604)	199	26	8.16	3.19	0.00121
regulation of cell morphogenesis involved in differentiation (GO:0010769)	83	16	3.4	4.7	0.00175
regulation of response to stimulus (GO:0048583)	919	70	37.69	1.86	0.00189
cell migration (GO:0016477)	278	31	11.4	2.72	0.00272
photoreceptor cell differentiation (GO:0046530)	169	23	6.93	3.32	0.00287
regulation of neuron projection development (GO:0010975)	99	17	4.06	4.19	0.00373
pattern specification process (GO:0007389)	493	44	20.22	2.18	0.00593
axon extension (GO:0048675)	35	10	1.44	6.97	0.00819
eye photoreceptor cell differentiation (GO:0001754)	154	21	6.32	3.33	0.00822
motor neuron axon guidance (GO:0008045)	63	13	2.58	5.03	0.00964
cell fate commitment (GO:0045165)	471	42	19.31	2.17	0.0104
neuron projection extension (GO:1990138)	36	10	1.48	6.77	0.0105
chemical synaptic transmission (GO:0007268)	211	25	8.65	2.89	0.0111
trans-synaptic signaling (GO:0099537)	211	25	8.65	2.89	0.0111
synaptic signaling (GO:0099536)	211	25	8.65	2.89	0.0111
anterograde trans-synaptic signaling (GO:0098916)	211	25	8.65	2.89	0.0111
cellular nitrogen compound metabolic process (GO:0034641)	1797	40	73.69	0.54	0.013
chemosensory behavior (GO:0007635)	159	21	6.52	3.22	0.0133
olfactory behavior (GO:0042048)	111	17	4.55	3.73	0.0167
glial cell migration (GO:0008347)	30	9	1.23	7.32	0.0175
regulation of cellular component organization (GO:0051128)	871	64	35.72	1.79	0.0188
negative regulation of cell development (GO:0010721)	78	14	3.2	4.38	0.0196
compound eye photoreceptor cell differentiation (GO:0001751)	150	20	6.15	3.25	0.0196
regulation of cell projection organization (GO:0031344)	125	18	5.13	3.51	0.0204
photoreceptor cell development (GO:0042461)	102	16	4.18	3.83	0.0234
localization of cell (GO:0051674)	327	32	13.41	2.39	0.0261
head development (GO:0060322)	154	20	6.32	3.17	0.0285
proximal/distal pattern formation (GO:0009954)	25	8	1.03	7.8	0.0366
regulation of locomotion (GO:0040012)	61	12	2.5	4.8	0.0366
regulation of organ morphogenesis (GO:2000027)	94	15	3.85	3.89	0.0367
negative regulation of multicellular organismal process (GO:0051241)	186	22	7.63	2.88	0.0433
cell motility (GO:0048870)	321	31	13.16	2.36	0.0463
homophilic cell adhesion via plasma membrane adhesion molecules (GO:0007156)	34	9	1.39	6.46	0.0469
