# Supplementary material for: Systems genetics of the Drosophila metabolome
Source: Genome Res. 2020 Mar;30(3):392–405. doi: 10.1101/gr.243030.118 (PMC7111526; doi:10.1101/gr.243030.118)
Supplement: Supplemental Material [file supp_gr.243030.118_Supplemental_Table_S8.xlsx.xlsx]

## Sheet: A. Females
Supplemental Table S8. Line means for body weight, free glucose, glycogen, free glycerol, triglyceride, total protein, thorax length and thorax width. (A) Females. (B) Males.
DGRP Line	Body Weight (mg)	Free Glucose (ng/ul)	Glycogen (ng/ul)	Free_Glycerol (ng/ul)	Triglyceride (ng/ul)	Protein (ng/ul)	Thorax Length (mm)	Thorax Width (mm)
DGRP_129	10.164	42.3565	72.0591	333.538	1510.97	2597.79	0.92508	0.79731
DGRP_158	11.448	66.2496	72.6788	391.149	1633.34	2925.82	0.99314	0.83337
DGRP_177	10.904	63.6849	48.8937	452.095	2003.1	2679.37	0.9773	0.81041
DGRP_195	11.574	61.6635	73.446	340.031	1625.34	2969.93	0.9968	0.79691
DGRP_208	11.39	62.4632	71.7149	341.232	1524.87	2693.59	1.0168	0.83291
DGRP_217	10.098	53.2685	40.9696	302.252	1087.95	2413.91	1.0038	0.77741
DGRP_228	11.02	54.7786	73.5614	272.598	1212.97	2745.44	1.0088	0.82791
DGRP_229	10.79	47.7902	87.8622	377.676	1729.6	2558.78	Not Done	Not Done
DGRP_239	10.508	64.2981	59.7984	316.34	1289.15	2429.25	1.0268	0.82791
DGRP_307	13.78	43.1225	90.4599	470.041	1921.33	3176.02	0.98451	0.81656
DGRP_315	11.076	54.5934	72.2336	366.527	1973.47	2656.74	0.99535	0.826736
DGRP_357	11.16	53.6913	64.6624	349.334	1364.38	2759.4	1.01708	0.82281
DGRP_367	11.642	37.8154	90.8865	381.962	1564.76	2839.53	0.95325	0.77481
DGRP_371	11.942	53.0047	68.3416	356.234	1454.16	3049.88	0.99508	0.82831
DGRP_375	12.686	79.4497	20.3982	534.548	2563.3	3156.36	1.03258	0.84581
DGRP_379	10.5725	58.2262	72.2961	378.728	1403.43	2553.14	0.9895	0.812402
DGRP_385	11.452	51.6423	77.1923	360.832	1402.09	2558.01	1.04826	0.83056
DGRP_391	11.872	81.6249	23.4169	308.863	1236.68	2833.7	0.98726	0.82506
DGRP_392	9.958	30.2325	72.2613	270.858	1302.33	2664.54	0.98526	0.81656
DGRP_399	11.658	44.1128	76.5844	324.373	1426.35	2661.23	0.99959	0.80343
DGRP_41	10.576	63.8508	62.2804	247.879	990.262	2239.38	1.00814	0.85837
DGRP_42	11.308	47.6025	52.9819	292.131	1260.46	2597.93	0.96314	0.82937
DGRP_427	12.132	55.9141	72.2991	360.253	1685.58	3247.62	1.05209	0.86843
DGRP_439	9.61	48.7189	87.0622	332.159	1632.9	2377.37	0.94209	0.77543
DGRP_45	11	55.9017	68.2841	275.297	1101.84	2632.8	0.99764	0.82437
DGRP_491	12.158	74.1291	50.1785	365.302	1717.91	3016.95	1.00109	0.85243
DGRP_508	9.77333	55.321	64.6599	320.471	1460.64	2401.48	0.90959	0.80493
DGRP_509	11.9325	61.4931	64.1799	337.033	1424.94	3015.33	1.01801	0.85506
DGRP_517	10.7567	52.5104	55.6636	332.674	1317.74	2554.62	1.02159	0.87643
DGRP_59	12.1225	38.5788	91.3782	312.95	1299.51	2787.56	0.98764	0.81387
DGRP_703	11.214	30.6227	69.0058	335.622	1307.11	3480.18	1.01401	0.85206
DGRP_757	10.968	58.6343	65.5053	342.53	1526.94	2465.62	0.99561	0.86047
DGRP_765	10.926	43.9327	48.8678	346.895	2054.91	3112.22	0.96561	0.81097
DGRP_774	11.06	43.5186	78.7485	369.412	1797.43	2944.27	0.96461	0.81547
DGRP_799	10.728	33.6555	91.3976	332.771	1350.05	2641.46	0.97911	0.80697
DGRP_808	12.542	61.1137	45.9879	362.775	1325.08	3449.01	1.03211	0.85047
DGRP_83	11.776	45.1873	76.2155	382.48	1583.96	3070.35	0.9678	0.81391
DGRP_843	12.37	59.7537	67.1284	386.101	1726.8	3204.01	1.02939	0.85775
DGRP_900	9.764	43.0751	66.2089	270.976	993.53	2525.46	0.99189	0.84425
DGRP_91	11.268	47.9962	78.3542	294.76	1235.24	2929	0.9503	0.81141

## Sheet: B. Males
DGRP Line	Body Weight (mg)	Free Glucose (ng/ul)	Glycogen (ng/ul)	Free Glycerol (ng/ul)	Triglyceride (ng/ul)	Total Protein (ng/ul)	Thorax Length (mm)	Thorax Width (mm)
DGRP_129	6.7875	19.3308	46.6119	295.731	1116.67	1444.61	0.83458	0.74831
DGRP_158	8.388	35.0244	55.9046	335.262	1216.97	1895.96	0.88514	0.75387
DGRP_177	6.36667	43.6204	62.9893	374.506	1630.03	1635.97	0.8538	0.73091
DGRP_195	7.90333	38.2165	61.1708	329.465	1247.14	1746.58	0.8713	0.71191
DGRP_208	7.48	36.3495	74.7796	321.738	1016.1	1547.07	0.8713	0.73591
DGRP_217	6.58	29.8527	83.4842	261.577	979.468	1538.28	0.8593	0.68541
DGRP_228	7.145	27.0375	50.1695	239.102	819.768	1560.42	0.8768	0.73541
DGRP_229	7.124	34.1024	77.7625	349.691	1310.99	1501.87	Not Done	Not Done
DGRP_239	7.402	43.3352	88.8474	246.895	896.066	1521.03	0.8683	0.73591
DGRP_307	9.10333	24.6183	85.1921	506.493	1256.03	1656.41	0.87751	0.74156
DGRP_315	8.334	45.5172	63.084	331.961	1268.15	1671.37	0.87576	0.74456
DGRP_357	7.08333	31.9549	74.1874	305.345	918.506	1462.88	0.87108	0.72081
DGRP_367	7.662	27.7567	80.5187	360.256	1186.89	1467.54	0.84858	0.72431
DGRP_371	7.47	23.1311	81.0756	297.15	881.34	1408.55	0.84408	0.72681
DGRP_375	8.774	63.943	69.9051	455.652	1852.45	1791.38	0.89558	0.76081
DGRP_379	7.145	28.3896	58.1838	382.563	1043.64	1537.8	0.84276	0.72156
DGRP_385	7.904	28.4675	72.6846	292.302	989.75	1678.05	0.92476	0.75856
DGRP_391	8.26167	47.3123	73.7565	262.235	843.243	1695.38	0.85526	0.74006
DGRP_392	6.735	20.6899	61.2693	350.197	1373.78	1468.61	0.84526	0.72906
DGRP_399	7.86667	32.2415	85.9646	279.296	1210.54	1720.1	0.89409	0.72543
DGRP_41	7.58	48.7108	70.1459	262.189	889.419	1450.84	0.87464	0.75787
DGRP_42	7.564	13.6514	47.312	215.952	982.898	1510.21	0.84164	0.73287
DGRP_427	7.85	28.0569	74.5884	366.018	1057.68	1731.94	0.90359	0.75843
DGRP_439	6.6075	26.4081	69.456	313.46	1185.71	1630.49	0.81559	0.68743
DGRP_45	7.465	20.851	73.7221	213.116	780.274	1693.6	0.86264	0.74187
DGRP_491	7.528	38.1383	91.253	308.312	1052.5	1617.14	0.87559	0.74343
DGRP_508	6.89	25.8424	81.5941	310.308	889.78	1460.96	0.80759	0.72743
DGRP_509	7.8325	42.3893	57.8146	344.638	1193.61	1660.57	0.88351	0.75556
DGRP_517	7.5225	30.0019	66.9241	305.753	950.56	1515.73	0.89759	0.76993
DGRP_59	8.145	33.3871	60.2083	324.734	1088.8	1691.2	0.83264	0.70887
DGRP_703	6.77667	31.9882	64.194	308.197	858.423	1589.15	0.86101	0.75056
DGRP_757	7.15	27.9389	80.3699	233.805	964.351	1464.94	0.85811	0.75597
DGRP_765	7.5775	28.0613	53.634	259.284	949.119	1956.88	0.87761	0.74497
DGRP_774	6.55	26.0213	66.765	286.926	1008.6	1456.21	0.86611	0.73847
DGRP_799	7.405	24.1923	86.238	416.018	1110.72	1668.27	0.85511	0.72447
DGRP_808	8.262	53.426	69.5003	361.121	994.923	1773.82	0.90461	0.76247
DGRP_83	8.305	33.151	87.4121	363.163	1119	1719.4	0.8398	0.71141
DGRP_843	7.35333	26.064	85.7154	331.485	1085.99	1621.4	0.91889	0.77625
DGRP_900	6.624	21.2491	57.4601	256.79	785.035	1356.85	0.87889	0.75075
DGRP_91	6.992	30.2421	62.0245	256.532	742.317	1716.73	0.8208	0.72391
