# Supplementary material for: Systems genetics of the Drosophila metabolome
Source: Genome Res. 2020 Mar;30(3):392–405. doi: 10.1101/gr.243030.118 (PMC7111526; doi:10.1101/gr.243030.118)
Supplement: Supplemental Material [file supp_gr.243030.118_Supplemental_Table_S9.xlsx.xlsx]

## Sheet: A. Female Metabolite
Supplemental Table S9. Metabolites that correlate with different traits in (A) females and (B) males; and metabolite module PCs correlated with different traits in (C) females and (D) males.
Metabolite	Metabolite ID	Trait	Spearman Correlation Coefficient	P-value	Number of Lines	Metabolite Super Pathway	Metabolite Sub Pathway
alanine	1126	Thorax Width	-0.32412	0.0441	39	Amino Acid	Alanine and Aspartate Metabolism
asparagine	512	Free Glycerol	0.31782	0.0457	40	Amino Acid	Alanine and Aspartate Metabolism
N-acetylalanine	1585	Thorax Width	-0.40045	0.0115	39	Amino Acid	Alanine and Aspartate Metabolism
glutamate	57	Startle Response	-0.44615	0.0039	40	Amino Acid	Glutamate Metabolism
glutamate, gamma-methyl ester	33487	Total Protein	-0.32833	0.0386	40	Amino Acid	Glutamate Metabolism
S-1-pyrroline-5-carboxylate	42370	Waking Activity	0.35254	0.0324	37	Amino Acid	Glutamate Metabolism
N-acetylserine	37076	Free Glycerol	0.51313	0.0007	40	Amino Acid	Glycine, Serine and Threonine Metabolism
N-acetylserine	37076	Thorax Width	-0.3385	0.035	39	Amino Acid	Glycine, Serine and Threonine Metabolism
N-acetylserine	37076	Triglyceride	0.55441	0.0002	40	Amino Acid	Glycine, Serine and Threonine Metabolism
N-acetylthreonine	33939	Free Glycerol	0.48349	0.0016	40	Amino Acid	Glycine, Serine and Threonine Metabolism
N-acetylthreonine	33939	Triglyceride	0.52852	0.0005	40	Amino Acid	Glycine, Serine and Threonine Metabolism
N-acetylthreonine	33939	Waking Activity	0.35135	0.033	37	Amino Acid	Glycine, Serine and Threonine Metabolism
phosphothreonine	37453	Starvation Resistance	-0.35639	0.0259	39	Amino Acid	Glycine, Serine and Threonine Metabolism
phosphothreonine	37453	Total Protein	-0.31316	0.0491	40	Amino Acid	Glycine, Serine and Threonine Metabolism
threonine	1284	Waking Activity	0.33675	0.0415	37	Amino Acid	Glycine, Serine and Threonine Metabolism
1-methylhistamine	43831	Free Glycerol	-0.33227	0.0362	40	Amino Acid	Histidine Metabolism
1-methylhistamine	43831	Starvation Resistance	-0.32817	0.0414	39	Amino Acid	Histidine Metabolism
1-methylhistamine	43831	Thorax Length	-0.32895	0.0409	39	Amino Acid	Histidine Metabolism
1-methylhistidine	30460	Lifespan	0.44879	0.0113	31	Amino Acid	Histidine Metabolism
histamine	1574	Body Weight	-0.38248	0.0149	40	Amino Acid	Histidine Metabolism
histamine	1574	Free Glucose	-0.36831	0.0194	40	Amino Acid	Histidine Metabolism
histamine	1574	Free Glycerol	-0.34298	0.0303	40	Amino Acid	Histidine Metabolism
N-acetylhistamine	48679	Thorax Length	-0.37368	0.0191	39	Amino Acid	Histidine Metabolism
3-methyl-2-oxobutyrate	44526	Free Glycerol	0.42983	0.0056	40	Amino Acid	Leucine, Isoleucine and Valine Metabolism
3-methyl-2-oxobutyrate	44526	Triglyceride	0.32045	0.0438	40	Amino Acid	Leucine, Isoleucine and Valine Metabolism
3-methyl-2-oxobutyrate	44526	Waking Activity	0.44711	0.0055	37	Amino Acid	Leucine, Isoleucine and Valine Metabolism
alpha-hydroxyisocaproate	22132	Free Glycerol	0.3394	0.0322	40	Amino Acid	Leucine, Isoleucine and Valine Metabolism
alpha-hydroxyisocaproate	22132	Triglyceride	0.35666	0.0239	40	Amino Acid	Leucine, Isoleucine and Valine Metabolism
alpha-hydroxyisocaproate	22132	Waking Activity	0.3561	0.0305	37	Amino Acid	Leucine, Isoleucine and Valine Metabolism
N-acetylleucine	1587	Waking Activity	0.32892	0.0468	37	Amino Acid	Leucine, Isoleucine and Valine Metabolism
N-acetylvaline	1591	Glycogen	0.33302	0.0357	40	Amino Acid	Leucine, Isoleucine and Valine Metabolism
N-acetylvaline	1591	Thorax Width	-0.36988	0.0205	39	Amino Acid	Leucine, Isoleucine and Valine Metabolism
glutarate (pentanedioate)	396	Startle Response	-0.33865	0.0326	40	Amino Acid	Lysine Metabolism
glutarate (pentanedioate)	396	Starvation Resistance	-0.33546	0.0368	39	Amino Acid	Lysine Metabolism
glutarate (pentanedioate)	396	Thorax Length	-0.36053	0.0242	39	Amino Acid	Lysine Metabolism
lysine	1301	Startle Response	-0.33096	0.037	40	Amino Acid	Lysine Metabolism
pipecolate	1444	Glycogen	0.3409	0.0313	40	Amino Acid	Lysine Metabolism
cystathionine	15705	Free Glucose	-0.39418	0.0118	40	Amino Acid	Methionine, Cysteine, SAM and Taurine Metabolism
cystine	56	Free Glycerol	-0.31257	0.0496	40	Amino Acid	Methionine, Cysteine, SAM and Taurine Metabolism
methionine sulfone	44878	Startle Response	-0.49362	0.0012	40	Amino Acid	Methionine, Cysteine, SAM and Taurine Metabolism
S-adenosylmethionine (SAM)	15915	Waking Activity	-0.35918	0.029	37	Amino Acid	Methionine, Cysteine, SAM and Taurine Metabolism
3,4-dihydroxyphenylacetate	18296	Total Protein	-0.31221	0.0498	40	Amino Acid	Phenylalanine and Tyrosine Metabolism
N-acetylphenylalanine	33950	Free Glycerol	0.40976	0.0086	40	Amino Acid	Phenylalanine and Tyrosine Metabolism
N-acetylphenylalanine	33950	Triglyceride	0.39325	0.0121	40	Amino Acid	Phenylalanine and Tyrosine Metabolism
phenylalanine	64	Free Glycerol	0.31501	0.0477	40	Amino Acid	Phenylalanine and Tyrosine Metabolism
phenyllactate (PLA)	22130	Waking Activity	0.32892	0.0468	37	Amino Acid	Phenylalanine and Tyrosine Metabolism
kynurenate	1417	Startle Response	0.37542	0.017	40	Amino Acid	Tryptophan Metabolism
kynurenine	15140	Thorax Width	0.32463	0.0438	39	Amino Acid	Tryptophan Metabolism
thioproline	53231	Waking Activity	-0.35942	0.0289	37	Amino Acid	Tryptophan Metabolism
argininosuccinate	15497	Thorax Width	0.36522	0.0222	39	Amino Acid	Urea cycle; Arginine and Proline Metabolism
dimethylarginine (SDMA + ADMA)	36808	Thorax Width	-0.32301	0.0449	39	Amino Acid	Urea cycle; Arginine and Proline Metabolism
dimethylarginine (SDMA + ADMA)	36808	Lifespan	0.37419	0.0381	31	Amino Acid	Urea cycle; Arginine and Proline Metabolism
N-monomethylarginine	43586	Lifespan	0.38145	0.0342	31	Amino Acid	Urea cycle; Arginine and Proline Metabolism
proline	1898	Thorax Width	-0.47596	0.0022	39	Amino Acid	Urea cycle; Arginine and Proline Metabolism
proline	1898	Lifespan	0.40766	0.0228	31	Amino Acid	Urea cycle; Arginine and Proline Metabolism
N6-carboxymethyllysine	36713	Waking Activity	0.3968	0.015	37	Carbohydrate	Advanced Glycation End-product
glucuronate	15443	Starvation Resistance	-0.34396	0.032	39	Carbohydrate	Aminosugar Metabolism
N-acetyl-glucosamine 1-phosphate	15741	Body Weight	-0.36154	0.0219	40	Carbohydrate	Aminosugar Metabolism
N-acetylglucosamine 6-phosphate	15107	Glycogen	0.31295	0.0493	40	Carbohydrate	Aminosugar Metabolism
sucrose	1519	Free Glucose	-0.41895	0.0071	40	Carbohydrate	Disaccharides and Oligosaccharides
sucrose	1519	Glycogen	0.38274	0.0148	40	Carbohydrate	Disaccharides and Oligosaccharides
sucrose	1519	Thorax Length	-0.5334	0.0005	39	Carbohydrate	Disaccharides and Oligosaccharides
sucrose	1519	Thorax Width	-0.44772	0.0043	39	Carbohydrate	Disaccharides and Oligosaccharides
isomaltose	39777	Free Glucose	0.56848	0.0001	40	Carbohydrate	Glycogen Metabolism
isomaltose	39777	Glycogen	-0.39662	0.0113	40	Carbohydrate	Glycogen Metabolism
maltopentaose	35163	Free Glucose	0.38668	0.0137	40	Carbohydrate	Glycogen Metabolism
maltopentaose	35163	Glycogen	-0.35403	0.025	40	Carbohydrate	Glycogen Metabolism
maltose	15586	Starvation Resistance	0.38526	0.0154	39	Carbohydrate	Glycogen Metabolism
maltotriose	44688	Starvation Resistance	0.39275	0.0134	39	Carbohydrate	Glycogen Metabolism
dihydroxyacetone phosphate (DHAP)	15522	Waking Activity	0.35586	0.0306	37	Carbohydrate	Glycolysis, Gluconeogenesis, and Pyruvate Metabolism
glucose	48152	Free Glucose	0.57467	0.0001	40	Carbohydrate	Glycolysis, Gluconeogenesis, and Pyruvate Metabolism
glucose	48152	Glycogen	-0.41332	0.008	40	Carbohydrate	Glycolysis, Gluconeogenesis, and Pyruvate Metabolism
arabonate/xylonate	48255	Startle Response	-0.31932	0.0446	40	Carbohydrate	Pentose Metabolism
6-phosphogluconate	15442	Triglyceride	-0.33959	0.032	40	Carbohydrate	Pentose Phosphate Pathway
ribose 1-phosphate	1763	Free Glycerol	-0.43482	0.005	40	Carbohydrate	Pentose Phosphate Pathway
ribose 1-phosphate	1763	Total Protein	-0.47019	0.0022	40	Carbohydrate	Pentose Phosphate Pathway
ribose 1-phosphate	1763	Triglyceride	-0.4139	0.0079	40	Carbohydrate	Pentose Phosphate Pathway
ribose 5-phosphate	561	Lifespan	0.36653	0.0426	31	Carbohydrate	Pentose Phosphate Pathway
sedoheptulose-7-phosphate	35649	Free Glycerol	-0.31726	0.0461	40	Carbohydrate	Pentose Phosphate Pathway
5-aminolevulinate	2290	Thorax Length	0.34089	0.0337	39	Cofactors and Vitamins	Hemoglobin and Porphyrin Metabolism
nicotinamide ribonucleotide (NMN)	22152	Waking Activity	-0.33422	0.0432	37	Cofactors and Vitamins	Nicotinate and Nicotinamide Metabolism
nicotinate ribonucleoside	33471	Startle Response	-0.38236	0.0149	40	Cofactors and Vitamins	Nicotinate and Nicotinamide Metabolism
pantothenate	1508	Startle Response	-0.42422	0.0064	40	Cofactors and Vitamins	Pantothenate and CoA Metabolism
flavin mononucleotide (FMN)	15797	Free Glucose	0.40375	0.0098	40	Cofactors and Vitamins	Riboflavin Metabolism
flavin mononucleotide (FMN)	15797	Glycogen	-0.55253	0.0002	40	Cofactors and Vitamins	Riboflavin Metabolism
flavin mononucleotide (FMN)	15797	Thorax Length	0.34211	0.033	39	Cofactors and Vitamins	Riboflavin Metabolism
flavin mononucleotide (FMN)	15797	Thorax Width	0.31633	0.0498	39	Cofactors and Vitamins	Riboflavin Metabolism
riboflavin (Vitamin B2)	1827	Thorax Width	0.35581	0.0262	39	Cofactors and Vitamins	Riboflavin Metabolism
biopterin	12358	Free Glycerol	0.31595	0.047	40	Cofactors and Vitamins	Tetrahydrobiopterin Metabolism
biopterin	12358	Triglyceride	0.34128	0.0312	40	Cofactors and Vitamins	Tetrahydrobiopterin Metabolism
pyridoxamine	2150	Startle Response	-0.31426	0.0483	40	Cofactors and Vitamins	Vitamin B6 Metabolism
pyridoxate	31555	Body Weight	-0.48311	0.0016	40	Cofactors and Vitamins	Vitamin B6 Metabolism
pyridoxate	31555	Total Protein	-0.49493	0.0012	40	Cofactors and Vitamins	Vitamin B6 Metabolism
2-methylcitrate	37483	Thorax Width	-0.33202	0.0389	39	Energy	TCA Cycle
alpha-ketoglutarate	528	Startle Response	0.31782	0.0457	40	Energy	TCA Cycle
succinate	1437	Waking Activity	0.34269	0.0379	37	Energy	TCA Cycle
carnitine	15500	Waking Activity	-0.36725	0.0254	37	Lipid	Carnitine Metabolism
deoxycarnitine	36747	Starvation Resistance	-0.39134	0.0138	39	Lipid	Carnitine Metabolism
1-palmitoleoyl-2-oleoyl-glycerol (16:1/18:1)*	52632	Free Glucose	0.32645	0.0398	40	Lipid	Diacylglycerol
1-palmitoleoyl-2-oleoyl-glycerol (16:1/18:1)*	52632	Lifespan	0.39194	0.0292	31	Lipid	Diacylglycerol
1-palmitoleoyl-3-oleoyl-glycerol (16:1/18:1)*	52631	Total Protein	-0.34822	0.0277	40	Lipid	Diacylglycerol
1-palmitoleoyl-3-oleoyl-glycerol (16:1/18:1)*	52631	Lifespan	0.38468	0.0326	31	Lipid	Diacylglycerol
1-palmitoyl-2-linoleoyl-glycerol (16:0/18:2)*	52633	Free Glycerol	0.46961	0.0022	40	Lipid	Diacylglycerol
1-palmitoyl-2-linoleoyl-glycerol (16:0/18:2)*	52633	Triglyceride	0.34465	0.0294	40	Lipid	Diacylglycerol
1-palmitoyl-3-linoleoyl-glycerol (16:0/18:2)*	52634	Free Glycerol	0.36229	0.0216	40	Lipid	Diacylglycerol
palmitoylcholine	52944	Starvation Resistance	0.44473	0.0046	39	Lipid	Fatty Acid Metabolism (Acyl Choline)
palmitoylcholine	52944	Thorax Width	-0.41048	0.0094	39	Lipid	Fatty Acid Metabolism (Acyl Choline)
palmitoylcholine	52944	Lifespan	0.44884	0.0113	31	Lipid	Fatty Acid Metabolism (Acyl Choline)
propionylcarnitine	32452	Free Glucose	-0.34747	0.028	40	Lipid	Fatty Acid Metabolism (also BCAA Metabolism)
propionylcarnitine	32452	Starvation Resistance	-0.39933	0.0118	39	Lipid	Fatty Acid Metabolism (also BCAA Metabolism)
3-hydroxybutyrylcarnitine (2)	52984	Starvation Resistance	-0.31876	0.048	39	Lipid	Fatty Acid Metabolism(Acyl Carnitine)
linoleoylcarnitine*	46223	Starvation Resistance	-0.32908	0.0408	39	Lipid	Fatty Acid Metabolism(Acyl Carnitine)
hexanoylglycine	35436	Body Weight	-0.32051	0.0438	40	Lipid	Fatty Acid Metabolism(Acyl Glycine)
2-hydroxyglutarate	37253	Startle Response	-0.38537	0.0141	40	Lipid	Fatty Acid, Dicarboxylate
undecanedioate	42395	Waking Activity	0.46253	0.0039	37	Lipid	Fatty Acid, Dicarboxylate
3-hydroxymyristate	21158	Lifespan	0.4996	0.0042	31	Lipid	Fatty Acid, Monohydroxy
3-hydroxypalmitate	27503	Free Glycerol	0.33846	0.0327	40	Lipid	Fatty Acid, Monohydroxy
3-hydroxypalmitate	27503	Thorax Width	-0.40439	0.0107	39	Lipid	Fatty Acid, Monohydroxy
3-hydroxypropanoate	1556	Free Glucose	-0.34071	0.0314	40	Lipid	Fatty Acid, Monohydroxy
3-hydroxypropanoate	1556	Thorax Length	-0.43846	0.0052	39	Lipid	Fatty Acid, Monohydroxy
3-hydroxypropanoate	1556	Thorax Width	-0.3885	0.0145	39	Lipid	Fatty Acid, Monohydroxy
glycerol	15122	Free Glycerol	0.31201	0.05	40	Lipid	Glycerolipid Metabolism
glycerol	15122	Starvation Resistance	0.32189	0.0457	39	Lipid	Glycerolipid Metabolism
glycerol	15122	Triglyceride	0.33246	0.0361	40	Lipid	Glycerolipid Metabolism
glycerol 3-phosphate	43847	Free Glucose	0.38386	0.0145	40	Lipid	Glycerolipid Metabolism
glycerol 3-phosphate	43847	Thorax Width	0.40095	0.0114	39	Lipid	Glycerolipid Metabolism
1,2-dilinoleoyl-galactosylglycerol (18:2/18:2)*	54899	Thorax Length	-0.36842	0.021	39	Lipid	Glycolipid Metabolism
myo-inositol	1124	Waking Activity	-0.34459	0.0367	37	Lipid	Inositol Metabolism
myristoleate (14:1n5)	32418	Free Glycerol	0.4636	0.0026	40	Lipid	Long Chain Fatty Acid
myristoleate (14:1n5)	32418	Total Protein	0.34109	0.0312	40	Lipid	Long Chain Fatty Acid
myristoleate (14:1n5)	32418	Triglyceride	0.33602	0.034	40	Lipid	Long Chain Fatty Acid
1-oleoyl-GPE (18:1)	35628	Starvation Resistance	-0.34032	0.034	39	Lipid	Lysolipid
1-oleoyl-GPE (18:1)	35628	Thorax Length	0.39717	0.0123	39	Lipid	Lysolipid
1-oleoyl-GPE (18:1)	35628	Thorax Width	0.43962	0.0051	39	Lipid	Lysolipid
1-oleoyl-GPG (18:1)*	45968	Waking Activity	-0.33058	0.0457	37	Lipid	Lysolipid
1-oleoyl-GPS (18:1)	19260	Glycogen	-0.34747	0.028	40	Lipid	Lysolipid
1-oleoyl-GPS (18:1)	19260	Thorax Width	0.35105	0.0284	39	Lipid	Lysolipid
1-palmitoleoyl-GPC (16:1)*	33230	Thorax Width	0.35702	0.0257	39	Lipid	Lysolipid
1-palmitoyl-GPG (16:0)*	45970	Body Weight	-0.36529	0.0205	40	Lipid	Lysolipid
1-palmitoyl-GPG (16:0)*	45970	Startle Response	0.34146	0.0311	40	Lipid	Lysolipid
1-palmitoyl-GPG (16:0)*	45970	Total Protein	-0.41088	0.0084	40	Lipid	Lysolipid
1-stearoyl-GPE (18:0)	42398	Body Weight	-0.38049	0.0154	40	Lipid	Lysolipid
1-stearoyl-GPE (18:0)	42398	Total Protein	-0.41201	0.0083	40	Lipid	Lysolipid
1-stearoyl-GPI (18:0)	19324	Glycogen	0.37073	0.0185	40	Lipid	Lysolipid
1-stearoyl-GPI (18:0)	19324	Waking Activity	-0.42551	0.0087	37	Lipid	Lysolipid
2-palmitoleoyl-GPC (16:1)*	35819	Thorax Length	0.34069	0.0338	39	Lipid	Lysolipid
2-palmitoleoyl-GPC (16:1)*	35819	Thorax Width	0.35803	0.0252	39	Lipid	Lysolipid
2-palmitoleoyl-GPC (16:1)*	35819	Waking Activity	-0.38683	0.018	37	Lipid	Lysolipid
2-palmitoyl-GPC (16:0)*	35253	Glycogen	-0.32195	0.0428	40	Lipid	Lysolipid
2-palmitoyl-GPC (16:0)*	35253	Thorax Length	0.32591	0.0429	39	Lipid	Lysolipid
2-palmitoyl-GPC (16:0)*	35253	Thorax Width	0.38972	0.0142	39	Lipid	Lysolipid
2-stearoyl-GPE (18:0)*	41220	Body Weight	-0.40131	0.0103	40	Lipid	Lysolipid
2-stearoyl-GPE (18:0)*	41220	Thorax Width	-0.40541	0.0105	39	Lipid	Lysolipid
2-stearoyl-GPE (18:0)*	41220	Total Protein	-0.35572	0.0243	40	Lipid	Lysolipid
1-(1-enyl-stearoyl)-GPE (P-18:0)*	39271	Body Weight	-0.39024	0.0128	40	Lipid	Lysoplasmalogen
1-(1-enyl-stearoyl)-GPE (P-18:0)*	39271	Total Protein	-0.32176	0.0429	40	Lipid	Lysoplasmalogen
3-hydroxy-3-methylglutarate	531	Free Glucose	-0.32608	0.04	40	Lipid	Mevalonate Metabolism
3-hydroxy-3-methylglutarate	531	Glycogen	0.33133	0.0368	40	Lipid	Mevalonate Metabolism
1,2-dilinoleoyl-GPC (18:2/18:2)	52603	Thorax Width	-0.41816	0.0081	39	Lipid	Phospholipid Metabolism
1,2-dilinoleoyl-GPE (18:2/18:2)*	53174	Glycogen	0.33771	0.0331	40	Lipid	Phospholipid Metabolism
1,2-dilinoleoyl-GPE (18:2/18:2)*	53174	Thorax Width	-0.3305	0.0399	39	Lipid	Phospholipid Metabolism
1,2-dioleoyl-GPE (18:1/18:1)	52609	Free Glycerol	-0.31801	0.0455	40	Lipid	Phospholipid Metabolism
1,2-dipalmitoleoyl-GPC (16:1/16:1)*	52472	Thorax Width	-0.34022	0.0341	39	Lipid	Phospholipid Metabolism
1,2-dipalmitoyl-GPC (16:0/16:0)	19130	Body Weight	-0.33133	0.0368	40	Lipid	Phospholipid Metabolism
1-linoleoyl-2-linolenoyl-GPC (18:2/18:3)*	53176	Thorax Width	-0.40986	0.0096	39	Lipid	Phospholipid Metabolism
1-oleoyl-2-linoleoyl-GPC (18:1/18:2)*	52453	Thorax Width	-0.397	0.0123	39	Lipid	Phospholipid Metabolism
1-oleoyl-2-linoleoyl-GPI (18:1/18:2)*	52451	Thorax Width	-0.50663	0.001	39	Lipid	Phospholipid Metabolism
1-palmitoleoyl-2-linoleoyl-GPC (16:1/18:2)*	52683	Thorax Width	-0.32738	0.0419	39	Lipid	Phospholipid Metabolism
1-palmitoyl-2-linoleoyl-GPC (16:0/18:2)	42446	Thorax Width	-0.43527	0.0056	39	Lipid	Phospholipid Metabolism
1-palmitoyl-2-linoleoyl-GPI (16:0/18:2)	52450	Body Weight	-0.33283	0.0359	40	Lipid	Phospholipid Metabolism
1-palmitoyl-2-linoleoyl-GPI (16:0/18:2)	52450	Thorax Width	-0.51513	0.0008	39	Lipid	Phospholipid Metabolism
1-palmitoyl-2-oleoyl-GPC (16:0/18:1)	52461	Thorax Width	-0.39781	0.0121	39	Lipid	Phospholipid Metabolism
1-palmitoyl-2-palmitoleoyl-GPC (16:0/16:1)*	52470	Body Weight	-0.34578	0.0289	40	Lipid	Phospholipid Metabolism
1-palmitoyl-2-palmitoleoyl-GPC (16:0/16:1)*	52470	Thorax Width	-0.3471	0.0304	39	Lipid	Phospholipid Metabolism
1-palmitoyl-2-palmitoleoyl-GPC (16:0/16:1)*	52470	Total Protein	-0.31295	0.0493	40	Lipid	Phospholipid Metabolism
1-stearoyl-2-linoleoyl-GPC (18:0/18:2)*	52452	Body Weight	-0.37242	0.018	40	Lipid	Phospholipid Metabolism
1-stearoyl-2-linoleoyl-GPC (18:0/18:2)*	52452	Thorax Width	-0.39346	0.0132	39	Lipid	Phospholipid Metabolism
1-stearoyl-2-linoleoyl-GPE (18:0/18:2)*	52446	Free Glucose	-0.32458	0.041	40	Lipid	Phospholipid Metabolism
1-stearoyl-2-linoleoyl-GPE (18:0/18:2)*	52446	Starvation Resistance	-0.32685	0.0423	39	Lipid	Phospholipid Metabolism
choline phosphate	34396	Free Glucose	0.3955	0.0115	40	Lipid	Phospholipid Metabolism
choline phosphate	34396	Starvation Resistance	0.43739	0.0054	39	Lipid	Phospholipid Metabolism
choline phosphate	34396	Waking Activity	-0.39169	0.0165	37	Lipid	Phospholipid Metabolism
glycerophosphoinositol*	47155	Body Weight	0.36848	0.0193	40	Lipid	Phospholipid Metabolism
glycerophosphoinositol*	47155	Total Protein	0.33659	0.0337	40	Lipid	Phospholipid Metabolism
glycerophosphoinositol*	47155	Waking Activity	0.37947	0.0205	37	Lipid	Phospholipid Metabolism
oleoylcholine	53260	Lifespan	0.39032	0.0299	31	Lipid	Phospholipid Metabolism
1-(1-enyl-palmitoyl)-2-linoleoyl-GPE (P-16:0/18:2)*	52677	Startle Response	-0.35553	0.0244	40	Lipid	Plasmalogen
1-(1-enyl-stearoyl)-2-linoleoyl-GPE (P-18:0/18:2)*	52748	Starvation Resistance	-0.50278	0.0011	39	Lipid	Plasmalogen
docosadienoate (22:2n6)	32415	Free Glycerol	0.34897	0.0273	40	Lipid	Polyunsaturated Fatty Acid (n3 and n6)
linolenate [alpha or gamma; (18:3n3 or 6)]	34035	Thorax Length	-0.34222	0.033	39	Lipid	Polyunsaturated Fatty Acid (n3 and n6)
3-ketosphinganine	34381	Startle Response	-0.35009	0.0268	40	Lipid	Sphingolipid Metabolism
3-ketosphinganine	34381	Thorax Length	-0.34777	0.0301	39	Lipid	Sphingolipid Metabolism
3-ketosphinganine	34381	Lifespan	-0.36976	0.0406	31	Lipid	Sphingolipid Metabolism
glycosyl-N-palmitoyl-sphingosine	53013	Glycogen	0.41932	0.0071	40	Lipid	Sphingolipid Metabolism
glycosyl-N-stearoyl-sphingosine	52234	Glycogen	0.38668	0.0137	40	Lipid	Sphingolipid Metabolism
sphinganine	17769	Lifespan	-0.39556	0.0276	31	Lipid	Sphingolipid Metabolism
campesterol	33997	Free Glycerol	0.32589	0.0402	40	Lipid	Sterol
campesterol	33997	Starvation Resistance	-0.52971	0.0005	39	Lipid	Sterol
campesterol	33997	Total Protein	0.35441	0.0248	40	Lipid	Sterol
campesterol	33997	Triglyceride	0.394	0.0119	40	Lipid	Sterol
ergosterol	27553	Starvation Resistance	-0.36886	0.0208	39	Lipid	Sterol
methylphosphate	37070	Startle Response	-0.33227	0.0362	40	Nucleotide	Purine and Pyrimidine Metabolism
2'-deoxyinosine	15076	Thorax Width	-0.41128	0.0093	39	Nucleotide	Purine Metabolism, (Hypo)Xanthine/Inosine containing
xanthine	3147	Total Protein	-0.34165	0.031	40	Nucleotide	Purine Metabolism, (Hypo)Xanthine/Inosine containing
adenine	554	Total Protein	0.34315	0.0302	40	Nucleotide	Purine Metabolism, Adenine containing
adenine	554	Waking Activity	-0.32584	0.0491	37	Nucleotide	Purine Metabolism, Adenine containing
adenosine 3'-monophosphate (3'-AMP)	35142	Total Protein	0.33283	0.0359	40	Nucleotide	Purine Metabolism, Adenine containing
adenosine-2',3'-cyclic monophosphate	37467	Startle Response	0.32158	0.043	40	Nucleotide	Purine Metabolism, Adenine containing
2'-deoxyguanosine	1411	Total Protein	0.33752	0.0332	40	Nucleotide	Purine Metabolism, Guanine containing
7-methylguanosine	31580	Starvation Resistance	-0.33202	0.0389	39	Nucleotide	Purine Metabolism, Guanine containing
guanosine 3'-monophosphate (3'-GMP)	39786	Total Protein	0.33171	0.0365	40	Nucleotide	Purine Metabolism, Guanine containing
orotate	1505	Free Glycerol	0.44934	0.0036	40	Nucleotide	Pyrimidine Metabolism, Orotate containing
orotate	1505	Startle Response	-0.42402	0.0064	40	Nucleotide	Pyrimidine Metabolism, Orotate containing
orotate	1505	Triglyceride	0.3878	0.0134	40	Nucleotide	Pyrimidine Metabolism, Orotate containing
3-aminoisobutyrate	1566	Free Glucose	-0.38105	0.0153	40	Nucleotide	Pyrimidine Metabolism, Thymine containing
3-aminoisobutyrate	1566	Glycogen	0.35197	0.0259	40	Nucleotide	Pyrimidine Metabolism, Thymine containing
3-aminoisobutyrate	1566	Thorax Length	-0.3164	0.0497	39	Nucleotide	Pyrimidine Metabolism, Thymine containing
3-aminoisobutyrate	1566	Waking Activity	0.43358	0.0073	37	Nucleotide	Pyrimidine Metabolism, Thymine containing
thymine	604	Glycogen	0.31619	0.0468	40	Nucleotide	Pyrimidine Metabolism, Thymine containing
thymine	604	Startle Response	-0.39895	0.0108	40	Nucleotide	Pyrimidine Metabolism, Thymine containing
beta-alanine	55	Starvation Resistance	-0.3469	0.0305	39	Nucleotide	Pyrimidine Metabolism, Uracil containing
beta-alanine	55	Thorax Width	0.37382	0.0191	39	Nucleotide	Pyrimidine Metabolism, Uracil containing
pseudouridine	33442	Free Glucose	-0.37092	0.0185	40	Nucleotide	Pyrimidine Metabolism, Uracil containing
pseudouridine	33442	Glycogen	0.33302	0.0357	40	Nucleotide	Pyrimidine Metabolism, Uracil containing
pseudouridine	33442	Waking Activity	0.3682	0.0249	37	Nucleotide	Pyrimidine Metabolism, Uracil containing
uracil	605	Waking Activity	0.44924	0.0053	37	Nucleotide	Pyrimidine Metabolism, Uracil containing
glutaminylleucine	42994	Free Glycerol	0.31839	0.0453	40	Peptide	Dipeptide
glycylisoleucine	36659	Free Glycerol	0.31388	0.0486	40	Peptide	Dipeptide
glycylisoleucine	36659	Waking Activity	0.32714	0.0481	37	Peptide	Dipeptide
glycylvaline	18357	Waking Activity	0.35657	0.0303	37	Peptide	Dipeptide
leucylglycine	40045	Starvation Resistance	0.36431	0.0226	39	Peptide	Dipeptide
phenylalanylglycine	41370	Starvation Resistance	0.33445	0.0374	39	Peptide	Dipeptide
threonylphenylalanine	31530	Starvation Resistance	0.36492	0.0224	39	Peptide	Dipeptide
tyrosylglycine	41375	Starvation Resistance	0.31815	0.0484	39	Peptide	Dipeptide
valylglycine	40475	Starvation Resistance	0.34619	0.0309	39	Peptide	Dipeptide
gamma-glutamylglutamine	2730	Body Weight	-0.33884	0.0325	40	Peptide	Gamma-glutamyl Amino Acid
gamma-glutamylglutamine	2730	Starvation Resistance	-0.42383	0.0072	39	Peptide	Gamma-glutamyl Amino Acid
gamma-glutamylisoleucine*	34456	Body Weight	-0.34508	0.0292	40	Peptide	Gamma-glutamyl Amino Acid
gamma-glutamylisoleucine*	34456	Total Protein	-0.41147	0.0083	40	Peptide	Gamma-glutamyl Amino Acid
gamma-glutamylmethionine	44872	Body Weight	-0.35053	0.0266	40	Peptide	Gamma-glutamyl Amino Acid
gamma-glutamylmethionine	44872	Starvation Resistance	-0.44485	0.0045	39	Peptide	Gamma-glutamyl Amino Acid
sulfate*	46960	Free Glucose	-0.394	0.0119	40	Xenobiotics	Chemical
sulfate*	46960	Glycogen	0.32645	0.0398	40	Xenobiotics	Chemical
1-kestose	22012	Thorax Length	-0.32024	0.0469	39	Xenobiotics	Food Component/Plant
kojibiose	21040	Free Glucose	0.55872	0.0002	40	Xenobiotics	Food Component/Plant
kojibiose	21040	Starvation Resistance	0.36087	0.024	39	Xenobiotics	Food Component/Plant
panose	37284	Free Glucose	0.39606	0.0114	40	Xenobiotics	Food Component/Plant
panose	37284	Starvation Resistance	0.38273	0.0162	39	Xenobiotics	Food Component/Plant
stachydrine	34384	Waking Activity	0.36784	0.0251	37	Xenobiotics	Food Component/Plant
1-methylurate	34395	Free Glucose	-0.39231	0.0123	40	Xenobiotics	Xanthine Metabolism
1-methylurate	34395	Glycogen	0.42645	0.0061	40	Xenobiotics	Xanthine Metabolism

## Sheet: B. Male Metabolite
Metabolite	Metabolite ID	Trait	Spearman Correlation Coefficient	P-value	Number of Lines	Metabolite Super Pathway	Metabolite Sub Pathway
alanine	1126	Lifespan	0.37742	0.0363	31	Amino Acid	Alanine and Aspartate Metabolism
N-acetylalanine	1585	Startle Response	0.32967	0.0378	40	Amino Acid	Alanine and Aspartate Metabolism
N-acetylasparagine	33942	Glycogen	-0.42101	0.0068	40	Amino Acid	Alanine and Aspartate Metabolism
N-methylalanine	37069	Startle Response	0.33746	0.0332	40	Amino Acid	Alanine and Aspartate Metabolism
carboxyethyl-GABA	40007	Aggression	-0.50038	0.001	40	Amino Acid	Glutamate Metabolism
gamma-aminobutyrate (GABA)	1416	Body Weight	-0.34251	0.0305	40	Amino Acid	Glutamate Metabolism
gamma-aminobutyrate (GABA)	1416	Thorax Width	-0.32866	0.0411	39	Amino Acid	Glutamate Metabolism
glutamine	53	Starvation Resistance	-0.37563	0.0184	39	Amino Acid	Glutamate Metabolism
N-acetylglutamine	33943	Glycogen	-0.406	0.0093	40	Amino Acid	Glutamate Metabolism
5-oxoproline	1494	Aggression	0.36266	0.0215	40	Amino Acid	Glutathione Metabolism
5-oxoproline	1494	Thorax Length	0.39729	0.0123	39	Amino Acid	Glutathione Metabolism
5-oxoproline	1494	Thorax Width	0.31874	0.048	39	Amino Acid	Glutathione Metabolism
cysteinylglycine	35637	Total Protein	0.33415	0.0351	40	Amino Acid	Glutathione Metabolism
homoserine lactone	15696	Total Protein	0.41295	0.0081	40	Amino Acid	Glycine, Serine and Threonine Metabolism
N-acetylserine	37076	Startle Response	0.39525	0.0116	40	Amino Acid	Glycine, Serine and Threonine Metabolism
sarcosine	1516	Free Glycerol	0.32083	0.0435	40	Amino Acid	Glycine, Serine and Threonine Metabolism
sarcosine	1516	Total Protein	0.31557	0.0473	40	Amino Acid	Glycine, Serine and Threonine Metabolism
sarcosine	1516	Triglyceride	0.35385	0.0251	40	Amino Acid	Glycine, Serine and Threonine Metabolism
serine	1648	Waking Activity	0.38689	0.018	37	Amino Acid	Glycine, Serine and Threonine Metabolism
threonine	1284	Body Weight	0.33651	0.0337	40	Amino Acid	Glycine, Serine and Threonine Metabolism
threonine	1284	Free Glucose	0.35178	0.026	40	Amino Acid	Glycine, Serine and Threonine Metabolism
1-methylhistidine	30460	Free Glycerol	-0.32645	0.0398	40	Amino Acid	Histidine Metabolism
1-methylhistidine	30460	Triglyceride	-0.33677	0.0336	40	Amino Acid	Histidine Metabolism
3-methylhistidine	15677	Starvation Resistance	0.34212	0.033	39	Amino Acid	Histidine Metabolism
histamine	1574	Thorax Length	-0.32633	0.0426	39	Amino Acid	Histidine Metabolism
2-hydroxy-3-methylvalerate	36746	Aggression	-0.37716	0.0164	40	Amino Acid	Leucine, Isoleucine and Valine Metabolism
3-methyl-2-oxobutyrate	44526	Waking Activity	0.38677	0.018	37	Amino Acid	Leucine, Isoleucine and Valine Metabolism
4-methyl-2-oxopentanoate	22116	Lifespan	-0.4629	0.0087	31	Amino Acid	Leucine, Isoleucine and Valine Metabolism
alpha-hydroxyisocaproate	22132	Aggression	-0.3571	0.0237	40	Amino Acid	Leucine, Isoleucine and Valine Metabolism
beta-hydroxyisovalerate	12129	Total Protein	0.35411	0.025	40	Amino Acid	Leucine, Isoleucine and Valine Metabolism
ethylmalonate	15765	Thorax Width	0.37654	0.0181	39	Amino Acid	Leucine, Isoleucine and Valine Metabolism
isobutyrylcarnitine	33441	Aggression	0.32176	0.0429	40	Amino Acid	Leucine, Isoleucine and Valine Metabolism
methylsuccinate	15745	Glycogen	-0.40236	0.0101	40	Amino Acid	Leucine, Isoleucine and Valine Metabolism
N-acetylleucine	1587	Lifespan	-0.54687	0.0015	31	Amino Acid	Leucine, Isoleucine and Valine Metabolism
lysine	1301	Lifespan	-0.40968	0.0221	31	Amino Acid	Lysine Metabolism
pipecolate	1444	Aggression	-0.33902	0.0324	40	Amino Acid	Lysine Metabolism
methionine sulfone	44878	Aggression	-0.34914	0.0272	40	Amino Acid	Methionine, Cysteine, SAM and Taurine Metabolism
methionine sulfoxide	18374	Glycogen	0.31689	0.0463	40	Amino Acid	Methionine, Cysteine, SAM and Taurine Metabolism
methionine sulfoxide	18374	Waking Activity	-0.33033	0.0458	37	Amino Acid	Methionine, Cysteine, SAM and Taurine Metabolism
N-acetylmethionine	1589	Free Glycerol	-0.3439	0.0298	40	Amino Acid	Methionine, Cysteine, SAM and Taurine Metabolism
N-acetylmethionine	1589	Thorax Length	-0.37988	0.0171	39	Amino Acid	Methionine, Cysteine, SAM and Taurine Metabolism
N-acetylmethionine sulfoxide	45428	Glycogen	0.3487	0.0274	40	Amino Acid	Methionine, Cysteine, SAM and Taurine Metabolism
N-acetylmethionine sulfoxide	45428	Waking Activity	-0.35057	0.0334	37	Amino Acid	Methionine, Cysteine, SAM and Taurine Metabolism
S-adenosylhomocysteine (SAH)	42382	Body Weight	0.34112	0.0312	40	Amino Acid	Methionine, Cysteine, SAM and Taurine Metabolism
S-adenosylhomocysteine (SAH)	42382	Thorax Length	0.42646	0.0068	39	Amino Acid	Methionine, Cysteine, SAM and Taurine Metabolism
S-adenosylhomocysteine (SAH)	42382	Thorax Width	0.35145	0.0282	39	Amino Acid	Methionine, Cysteine, SAM and Taurine Metabolism
S-adenosylhomocysteine (SAH)	42382	Lifespan	0.37484	0.0377	31	Amino Acid	Methionine, Cysteine, SAM and Taurine Metabolism
S-adenosylhomocysteine (SAH)	42382	Waking Activity	-0.46345	0.0039	37	Amino Acid	Methionine, Cysteine, SAM and Taurine Metabolism
S-adenosylmethionine (SAM)	15915	Glycogen	0.36173	0.0218	40	Amino Acid	Methionine, Cysteine, SAM and Taurine Metabolism
dihydoxyphenylalanine (L-DOPA)	1576	Free Glucose	0.32345	0.0418	40	Amino Acid	Phenylalanine and Tyrosine Metabolism
dihydoxyphenylalanine (L-DOPA)	1576	Total Protein	0.40713	0.0091	40	Amino Acid	Phenylalanine and Tyrosine Metabolism
N-acetylphenylalanine	33950	Free Glucose	0.3461	0.0287	40	Amino Acid	Phenylalanine and Tyrosine Metabolism
N-acetylphenylalanine	33950	Lifespan	-0.40464	0.024	31	Amino Acid	Phenylalanine and Tyrosine Metabolism
phenylalanine	64	Waking Activity	0.32488	0.0498	37	Amino Acid	Phenylalanine and Tyrosine Metabolism
phenyllactate (PLA)	22130	Waking Activity	0.34043	0.0392	37	Amino Acid	Phenylalanine and Tyrosine Metabolism
N-acetylputrescine	37496	Starvation Resistance	-0.36227	0.0234	39	Amino Acid	Polyamine Metabolism
putrescine	1408	Free Glucose	-0.33715	0.0334	40	Amino Acid	Polyamine Metabolism
spermidine	485	Aggression	0.36643	0.02	40	Amino Acid	Polyamine Metabolism
kynurenate	1417	Startle Response	0.44038	0.0045	40	Amino Acid	Tryptophan Metabolism
kynurenine	15140	Thorax Width	0.43363	0.0058	39	Amino Acid	Tryptophan Metabolism
arginine	1638	Free Glycerol	-0.36229	0.0216	40	Amino Acid	Urea cycle; Arginine and Proline Metabolism
argininosuccinate	15497	Thorax Length	0.52563	0.0006	39	Amino Acid	Urea cycle; Arginine and Proline Metabolism
argininosuccinate	15497	Thorax Width	0.38686	0.015	39	Amino Acid	Urea cycle; Arginine and Proline Metabolism
argininosuccinate	15497	Lifespan	0.43871	0.0136	31	Amino Acid	Urea cycle; Arginine and Proline Metabolism
citrulline	2132	Starvation Resistance	-0.3567	0.0258	39	Amino Acid	Urea cycle; Arginine and Proline Metabolism
N-acetylarginine	33953	Free Glucose	0.37861	0.016	40	Amino Acid	Urea cycle; Arginine and Proline Metabolism
ornithine	1493	Thorax Length	-0.40599	0.0103	39	Amino Acid	Urea cycle; Arginine and Proline Metabolism
proline	1898	Free Glucose	-0.35178	0.026	40	Amino Acid	Urea cycle; Arginine and Proline Metabolism
proline	1898	Starvation Resistance	0.34445	0.0318	39	Amino Acid	Urea cycle; Arginine and Proline Metabolism
trans-4-hydroxyproline	32306	Waking Activity	-0.41262	0.0112	37	Amino Acid	Urea cycle; Arginine and Proline Metabolism
N6-carboxymethyllysine	36713	Lifespan	-0.40847	0.0225	31	Carbohydrate	Advanced Glycation End-product
N6-carboxymethyllysine	36713	Waking Activity	0.37539	0.0221	37	Carbohydrate	Advanced Glycation End-product
erythronate*	42420	Thorax Length	-0.3235	0.0445	39	Carbohydrate	Aminosugar Metabolism
glucuronate	15443	Glycogen	-0.39644	0.0113	40	Carbohydrate	Aminosugar Metabolism
glucuronate	15443	Starvation Resistance	-0.48808	0.0016	39	Carbohydrate	Aminosugar Metabolism
N-acetylglucosamine 6-phosphate	15107	Free Glucose	-0.44822	0.0037	40	Carbohydrate	Aminosugar Metabolism
N-acetylglucosamine 6-phosphate	15107	Thorax Length	-0.32259	0.0452	39	Carbohydrate	Aminosugar Metabolism
N-acetylglucosamine/N-acetylgalactosamine	46539	Starvation Resistance	-0.39435	0.013	39	Carbohydrate	Aminosugar Metabolism
sucrose	1519	Thorax Length	-0.44962	0.0041	39	Carbohydrate	Disaccharides and Oligosaccharides
sucrose	1519	Thorax Width	-0.46683	0.0027	39	Carbohydrate	Disaccharides and Oligosaccharides
sucrose	1519	Waking Activity	0.36317	0.0272	37	Carbohydrate	Disaccharides and Oligosaccharides
fructose	48195	Starvation Resistance	-0.36065	0.0241	39	Carbohydrate	Fructose, Mannose and Galactose Metabolism
fructose	48195	Thorax Length	-0.37097	0.0201	39	Carbohydrate	Fructose, Mannose and Galactose Metabolism
isomaltose	39777	Free Glucose	0.47448	0.002	40	Carbohydrate	Glycogen Metabolism
maltopentaose	35163	Free Glucose	0.35441	0.0248	40	Carbohydrate	Glycogen Metabolism
maltose	15586	Starvation Resistance	0.41854	0.008	39	Carbohydrate	Glycogen Metabolism
maltotetraose	15910	Total Protein	0.3561	0.0241	40	Carbohydrate	Glycogen Metabolism
2-phosphoglycerate	35629	Aggression	0.33237	0.0361	40	Carbohydrate	Glycolysis, Gluconeogenesis, and Pyruvate Metabolism
2-phosphoglycerate	35629	Triglyceride	-0.32223	0.0426	40	Carbohydrate	Glycolysis, Gluconeogenesis, and Pyruvate Metabolism
3-phosphoglycerate	1414	Startle Response	0.34187	0.0308	40	Carbohydrate	Glycolysis, Gluconeogenesis, and Pyruvate Metabolism
dihydroxyacetone phosphate (DHAP)	15522	Free Glucose	0.3349	0.0347	40	Carbohydrate	Glycolysis, Gluconeogenesis, and Pyruvate Metabolism
dihydroxyacetone phosphate (DHAP)	15522	Glycogen	0.31332	0.049	40	Carbohydrate	Glycolysis, Gluconeogenesis, and Pyruvate Metabolism
dihydroxyacetone phosphate (DHAP)	15522	Starvation Resistance	0.39	0.0141	39	Carbohydrate	Glycolysis, Gluconeogenesis, and Pyruvate Metabolism
glucose	48152	Free Glucose	0.53077	0.0004	40	Carbohydrate	Glycolysis, Gluconeogenesis, and Pyruvate Metabolism
Isobar: fructose 1,6-diphosphate, glucose 1,6-diphosphate, myo-inositol 1,4 or 1,3-diphosphate	46896	Total Protein	-0.33069	0.0371	40	Carbohydrate	Glycolysis, Gluconeogenesis, and Pyruvate Metabolism
Isobar: fructose 1,6-diphosphate, glucose 1,6-diphosphate, myo-inositol 1,4 or 1,3-diphosphate	46896	Triglyceride	-0.44777	0.0038	40	Carbohydrate	Glycolysis, Gluconeogenesis, and Pyruvate Metabolism
pyruvate	22250	Aggression	0.46398	0.0026	40	Carbohydrate	Glycolysis, Gluconeogenesis, and Pyruvate Metabolism
pyruvate	22250	Free Glucose	-0.38649	0.0138	40	Carbohydrate	Glycolysis, Gluconeogenesis, and Pyruvate Metabolism
UDP-N-acetylglucosamine	35162	Starvation Resistance	-0.4319	0.006	39	Carbohydrate	Nucleotide Sugar
UDP-N-acetylglucosamine	35162	Waking Activity	-0.40194	0.0137	37	Carbohydrate	Nucleotide Sugar
arabitol/xylitol	48885	Aggression	0.33152	0.0366	40	Carbohydrate	Pentose Metabolism
arabitol/xylitol	48885	Triglyceride	-0.37899	0.0159	40	Carbohydrate	Pentose Metabolism
arabonate/xylonate	48255	Aggression	-0.37036	0.0187	40	Carbohydrate	Pentose Metabolism
ribitol	15772	Aggression	-0.42101	0.0068	40	Carbohydrate	Pentose Metabolism
ribose	1471	Aggression	-0.3379	0.033	40	Carbohydrate	Pentose Metabolism
6-phosphogluconate	15442	Triglyceride	-0.35291	0.0255	40	Carbohydrate	Pentose Phosphate Pathway
ribose 1-phosphate	1763	Free Glycerol	-0.41407	0.0079	40	Carbohydrate	Pentose Phosphate Pathway
ribose 1-phosphate	1763	Triglyceride	-0.52777	0.0005	40	Carbohydrate	Pentose Phosphate Pathway
gulonic acid*	46957	Starvation Resistance	-0.32228	0.0454	39	Cofactors and Vitamins	Ascorbate and Aldarate Metabolism
flavin mononucleotide (FMN)	15797	Free Glucose	0.34991	0.0269	40	Cofactors and Vitamins	Riboflavin Metabolism
flavin mononucleotide (FMN)	15797	Starvation Resistance	-0.3648	0.0224	39	Cofactors and Vitamins	Riboflavin Metabolism
pyridoxate	31555	Thorax Width	0.32228	0.0454	39	Cofactors and Vitamins	Vitamin B6 Metabolism
2-methylcitrate	37483	Aggression	-0.35872	0.023	40	Energy	TCA Cycle
2-methylcitrate	37483	Lifespan	-0.39919	0.0261	31	Energy	TCA Cycle
aconitate [cis or trans]	46173	Aggression	-0.40694	0.0092	40	Energy	TCA Cycle
aconitate [cis or trans]	46173	Thorax Length	-0.34405	0.032	39	Energy	TCA Cycle
alpha-ketoglutarate	528	Aggression	0.4152	0.0077	40	Energy	TCA Cycle
alpha-ketoglutarate	528	Free Glucose	-0.31651	0.0466	40	Energy	TCA Cycle
citraconate/glutaconate	47076	Aggression	0.47824	0.0018	40	Energy	TCA Cycle
citraconate/glutaconate	47076	Free Glucose	-0.46754	0.0024	40	Energy	TCA Cycle
citrate	1564	Aggression	-0.34597	0.0288	40	Energy	TCA Cycle
mesaconate (methylfumarate)	18493	Aggression	0.47148	0.0021	40	Energy	TCA Cycle
mesaconate (methylfumarate)	18493	Free Glucose	-0.4227	0.0066	40	Energy	TCA Cycle
1-oleoyl-2-linoleoyl-glycerol (18:1/18:2)	46798	Free Glycerol	0.56735	0.0001	40	Lipid	Diacylglycerol
1-oleoyl-2-linoleoyl-glycerol (18:1/18:2)	46798	Starvation Resistance	0.448	0.0042	39	Lipid	Diacylglycerol
1-oleoyl-3-linoleoyl-glycerol (18:1/18:2)	46799	Free Glycerol	0.50938	0.0008	40	Lipid	Diacylglycerol
1-oleoyl-3-linoleoyl-glycerol (18:1/18:2)	46799	Starvation Resistance	0.45964	0.0032	39	Lipid	Diacylglycerol
1-palmitoleoyl-2-oleoyl-glycerol (16:1/18:1)*	52632	Free Glycerol	0.37167	0.0182	40	Lipid	Diacylglycerol
1-palmitoleoyl-2-oleoyl-glycerol (16:1/18:1)*	52632	Starvation Resistance	0.54163	0.0004	39	Lipid	Diacylglycerol
1-palmitoleoyl-3-oleoyl-glycerol (16:1/18:1)*	52631	Starvation Resistance	0.53545	0.0004	39	Lipid	Diacylglycerol
1-palmitoyl-2-linoleoyl-glycerol (16:0/18:2)*	52633	Free Glycerol	0.53471	0.0004	40	Lipid	Diacylglycerol
1-palmitoyl-3-linoleoyl-glycerol (16:0/18:2)*	52634	Free Glycerol	0.42214	0.0067	40	Lipid	Diacylglycerol
palmitoylcholine	52944	Glycogen	0.37773	0.0163	40	Lipid	Fatty Acid Metabolism (Acyl Choline)
propionylcarnitine	32452	Aggression	0.32514	0.0406	40	Lipid	Fatty Acid Metabolism (also BCAA Metabolism)
propionylcarnitine	32452	Starvation Resistance	-0.34253	0.0328	39	Lipid	Fatty Acid Metabolism (also BCAA Metabolism)
propionylglycine	31932	Thorax Length	-0.32036	0.0468	39	Lipid	Fatty Acid Metabolism (also BCAA Metabolism)
3-hydroxybutyrylcarnitine (2)	52984	Thorax Width	0.33048	0.0399	39	Lipid	Fatty Acid Metabolism(Acyl Carnitine)
acetylcarnitine	32198	Thorax Length	0.31975	0.0472	39	Lipid	Fatty Acid Metabolism(Acyl Carnitine)
acetylcarnitine	32198	Thorax Width	0.45842	0.0033	39	Lipid	Fatty Acid Metabolism(Acyl Carnitine)
acetylcarnitine	32198	Total Protein	-0.32983	0.0377	40	Lipid	Fatty Acid Metabolism(Acyl Carnitine)
linoleoylcarnitine*	46223	Aggression	0.32702	0.0394	40	Lipid	Fatty Acid Metabolism(Acyl Carnitine)
linoleoylcarnitine*	46223	Free Glucose	-0.33809	0.0329	40	Lipid	Fatty Acid Metabolism(Acyl Carnitine)
linoleoylcarnitine*	46223	Lifespan	0.475	0.0069	31	Lipid	Fatty Acid Metabolism(Acyl Carnitine)
myristoylcarnitine	33952	Aggression	0.36904	0.0191	40	Lipid	Fatty Acid Metabolism(Acyl Carnitine)
myristoylcarnitine	33952	Lifespan	0.44355	0.0124	31	Lipid	Fatty Acid Metabolism(Acyl Carnitine)
palmitoleoylcarnitine*	53223	Aggression	0.33283	0.0359	40	Lipid	Fatty Acid Metabolism(Acyl Carnitine)
palmitoleoylcarnitine*	53223	Lifespan	0.46734	0.008	31	Lipid	Fatty Acid Metabolism(Acyl Carnitine)
stearoylcarnitine	34409	Free Glucose	-0.32514	0.0406	40	Lipid	Fatty Acid Metabolism(Acyl Carnitine)
hexanoylglycine	35436	Thorax Length	0.35105	0.0284	39	Lipid	Fatty Acid Metabolism(Acyl Glycine)
malonate	15872	Thorax Width	0.32907	0.0408	39	Lipid	Fatty Acid Synthesis
adipate	21134	Free Glycerol	0.44859	0.0037	40	Lipid	Fatty Acid, Dicarboxylate
adipate	21134	Triglyceride	0.3212	0.0433	40	Lipid	Fatty Acid, Dicarboxylate
azelate (nonanedioate)	18362	Glycogen	-0.36435	0.0208	40	Lipid	Fatty Acid, Dicarboxylate
azelate (nonanedioate)	18362	Thorax Length	-0.46925	0.0026	39	Lipid	Fatty Acid, Dicarboxylate
azelate (nonanedioate)	18362	Thorax Width	-0.46176	0.0031	39	Lipid	Fatty Acid, Dicarboxylate
dodecanedioate	32388	Free Glucose	0.37205	0.0181	40	Lipid	Fatty Acid, Dicarboxylate
dodecanedioate	32388	Free Glycerol	0.3334	0.0355	40	Lipid	Fatty Acid, Dicarboxylate
dodecanedioate	32388	Thorax Length	0.36216	0.0235	39	Lipid	Fatty Acid, Dicarboxylate
tetradecanedioate	35669	Free Glucose	0.49531	0.0012	40	Lipid	Fatty Acid, Dicarboxylate
9,10-DiHOME	38399	Glycogen	-0.32083	0.0435	40	Lipid	Fatty Acid, Dihydroxy
13-HODE + 9-HODE	37752	Glycogen	-0.35535	0.0244	40	Lipid	Fatty Acid, Monohydroxy
13-HODE + 9-HODE	37752	Thorax Length	-0.49628	0.0013	39	Lipid	Fatty Acid, Monohydroxy
13-HODE + 9-HODE	37752	Thorax Width	-0.50519	0.001	39	Lipid	Fatty Acid, Monohydroxy
16-hydroxypalmitate	39609	Starvation Resistance	0.31935	0.0475	39	Lipid	Fatty Acid, Monohydroxy
3-hydroxydecanoate	22053	Thorax Width	0.35801	0.0252	39	Lipid	Fatty Acid, Monohydroxy
3-hydroxymyristate	21158	Starvation Resistance	0.40852	0.0098	39	Lipid	Fatty Acid, Monohydroxy
3-hydroxyoctanoate	22001	Thorax Length	0.33951	0.0345	39	Lipid	Fatty Acid, Monohydroxy
3-hydroxyoctanoate	22001	Thorax Width	0.33424	0.0376	39	Lipid	Fatty Acid, Monohydroxy
3-hydroxypalmitate	27503	Free Glycerol	0.37692	0.0165	40	Lipid	Fatty Acid, Monohydroxy
3-hydroxypalmitate	27503	Starvation Resistance	0.36429	0.0226	39	Lipid	Fatty Acid, Monohydroxy
3-hydroxypropanoate	1556	Thorax Length	-0.45377	0.0037	39	Lipid	Fatty Acid, Monohydroxy
3-hydroxysebacate	31943	Thorax Width	0.4562	0.0035	39	Lipid	Fatty Acid, Monohydroxy
3-hydroxysuberate	31936	Body Weight	0.37658	0.0166	40	Lipid	Fatty Acid, Monohydroxy
3-hydroxysuberate	31936	Free Glucose	0.33313	0.0357	40	Lipid	Fatty Acid, Monohydroxy
3-hydroxysuberate	31936	Free Glycerol	0.37016	0.0187	40	Lipid	Fatty Acid, Monohydroxy
3-hydroxysuberate	31936	Thorax Length	0.37278	0.0194	39	Lipid	Fatty Acid, Monohydroxy
3-hydroxysuberate	31936	Thorax Width	0.3756	0.0185	39	Lipid	Fatty Acid, Monohydroxy
3-hydroxysuberate	31936	Total Protein	0.42833	0.0058	40	Lipid	Fatty Acid, Monohydroxy
glycerol	15122	Free Glycerol	0.39906	0.0107	40	Lipid	Glycerolipid Metabolism
glycerol	15122	Starvation Resistance	0.42118	0.0076	39	Lipid	Glycerolipid Metabolism
1-palmitoyl-2-linolenoyl-galactosylglycerol (16:0/18:3)*	54900	Startle Response	-0.3186	0.0451	40	Lipid	Glycolipid Metabolism
1-palmitoyl-2-linolenoyl-galactosylglycerol (16:0/18:3)*	54900	Lifespan	0.35645	0.049	31	Lipid	Glycolipid Metabolism
1-palmitoyl-2-linoleoyl-galactosylglycerol (16:0/18:2)*	54901	Startle Response	-0.34675	0.0284	40	Lipid	Glycolipid Metabolism
myo-inositol	1124	Free Glucose	-0.38161	0.0151	40	Lipid	Inositol Metabolism
myristate (14:0)	1365	Free Glycerol	0.37561	0.0169	40	Lipid	Long Chain Fatty Acid
myristate (14:0)	1365	Starvation Resistance	0.34637	0.0308	39	Lipid	Long Chain Fatty Acid
myristoleate (14:1n5)	32418	Free Glycerol	0.3728	0.0178	40	Lipid	Long Chain Fatty Acid
myristoleate (14:1n5)	32418	Starvation Resistance	0.39749	0.0122	39	Lipid	Long Chain Fatty Acid
1-linoleoyl-GPC (18:2)	34419	Body Weight	-0.31418	0.0483	40	Lipid	Lysolipid
1-palmitoleoyl-GPC (16:1)*	33230	Starvation Resistance	0.32927	0.0407	39	Lipid	Lysolipid
1-(1-enyl-stearoyl)-GPE (P-18:0)*	39271	Starvation Resistance	-0.34779	0.03	39	Lipid	Lysoplasmalogen
5-dodecenoate (12:1n7)	33968	Starvation Resistance	0.35953	0.0246	39	Lipid	Medium Chain Fatty Acid
caprate (10:0)	1642	Starvation Resistance	0.42239	0.0074	39	Lipid	Medium Chain Fatty Acid
laurate (12:0)	1645	Free Glycerol	0.31951	0.0445	40	Lipid	Medium Chain Fatty Acid
laurate (12:0)	1645	Starvation Resistance	0.36287	0.0232	39	Lipid	Medium Chain Fatty Acid
3-hydroxy-3-methylglutarate	531	Glycogen	-0.34035	0.0316	40	Lipid	Mevalonate Metabolism
1,2-dipalmitoleoyl-GPC (16:1/16:1)*	52472	Free Glycerol	-0.32364	0.0416	40	Lipid	Phospholipid Metabolism
1-oleoyl-2-linoleoyl-GPC (18:1/18:2)*	52453	Glycogen	0.32326	0.0419	40	Lipid	Phospholipid Metabolism
1-palmitoleoyl-2-linoleoyl-GPC (16:1/18:2)*	52683	Glycogen	0.36679	0.0199	40	Lipid	Phospholipid Metabolism
1-palmitoyl-2-linoleoyl-GPC (16:0/18:2)	42446	Glycogen	0.38874	0.0132	40	Lipid	Phospholipid Metabolism
1-palmitoyl-2-linoleoyl-GPE (16:0/18:2)	42449	Glycogen	0.3469	0.0283	40	Lipid	Phospholipid Metabolism
1-palmitoyl-2-oleoyl-GPC (16:0/18:1)	52461	Glycogen	0.38236	0.0149	40	Lipid	Phospholipid Metabolism
1-palmitoyl-2-palmitoleoyl-GPC (16:0/16:1)*	52470	Lifespan	0.39194	0.0292	31	Lipid	Phospholipid Metabolism
1-stearoyl-2-linoleoyl-GPE (18:0/18:2)*	52446	Glycogen	0.39493	0.0117	40	Lipid	Phospholipid Metabolism
choline	15506	Thorax Width	0.31783	0.0486	39	Lipid	Phospholipid Metabolism
cytidine-5'-diphosphoethanolamine	34410	Glycogen	-0.32045	0.0438	40	Lipid	Phospholipid Metabolism
glycerophosphoinositol*	47155	Glycogen	-0.33865	0.0326	40	Lipid	Phospholipid Metabolism
glycerophosphorylcholine (GPC)	15990	Glycogen	-0.43039	0.0056	40	Lipid	Phospholipid Metabolism
palmitoloelycholine	53257	Glycogen	0.45066	0.0035	40	Lipid	Phospholipid Metabolism
1-(1-enyl-palmitoyl)-2-linoleoyl-GPC (P-16:0/18:2)*	52682	Free Glucose	-0.397	0.0112	40	Lipid	Plasmalogen
1-(1-enyl-palmitoyl)-2-linoleoyl-GPE (P-16:0/18:2)*	52677	Free Glucose	-0.44278	0.0042	40	Lipid	Plasmalogen
1-(1-enyl-palmitoyl)-2-oleoyl-GPE (P-16:0/18:1)*	52477	Aggression	0.3878	0.0134	40	Lipid	Plasmalogen
1-(1-enyl-stearoyl)-2-linoleoyl-GPE (P-18:0/18:2)*	52748	Aggression	0.31839	0.0453	40	Lipid	Plasmalogen
1-(1-enyl-stearoyl)-2-linoleoyl-GPE (P-18:0/18:2)*	52748	Free Glucose	-0.46173	0.0027	40	Lipid	Plasmalogen
1-(1-enyl-stearoyl)-2-linoleoyl-GPE (P-18:0/18:2)*	52748	Starvation Resistance	-0.46672	0.0027	39	Lipid	Plasmalogen
1-(1-enyl-stearoyl)-2-linoleoyl-GPE (P-18:0/18:2)*	52748	Lifespan	0.46129	0.009	31	Lipid	Plasmalogen
1-(1-enyl-stearoyl)-2-oleoyl-GPE (P-18:0/18:1)	52614	Free Glycerol	-0.44278	0.0042	40	Lipid	Plasmalogen
glycosyl-N-stearoyl-sphingosine	52234	Free Glucose	-0.33846	0.0327	40	Lipid	Sphingolipid Metabolism
lactosyl-N-palmitoyl-sphingosine	53010	Body Weight	0.34823	0.0277	40	Lipid	Sphingolipid Metabolism
phytosphingosine	1510	Glycogen	-0.35328	0.0253	40	Lipid	Sphingolipid Metabolism
phytosphingosine	1510	Starvation Resistance	-0.32714	0.0421	39	Lipid	Sphingolipid Metabolism
beta-sitosterol	27414	Aggression	0.32402	0.0414	40	Lipid	Sterol
campesterol	33997	Starvation Resistance	-0.52229	0.0006	39	Lipid	Sterol
campesterol	33997	Thorax Width	0.35386	0.0271	39	Lipid	Sterol
urate	1604	Free Glucose	-0.36792	0.0195	40	Nucleotide	Purine Metabolism, (Hypo)Xanthine/Inosine containing
xanthosine	15136	Free Glucose	-0.34559	0.0289	40	Nucleotide	Purine Metabolism, (Hypo)Xanthine/Inosine containing
1-methyladenine	1527	Free Glucose	-0.3334	0.0355	40	Nucleotide	Purine Metabolism, Adenine containing
1-methyladenine	1527	Total Protein	-0.43809	0.0047	40	Nucleotide	Purine Metabolism, Adenine containing
adenosine	555	Triglyceride	-0.31726	0.0461	40	Nucleotide	Purine Metabolism, Adenine containing
adenosine 3'-monophosphate (3'-AMP)	35142	Aggression	0.34859	0.0275	40	Nucleotide	Purine Metabolism, Adenine containing
adenosine 5'-monophosphate (AMP)	32342	Thorax Length	0.37785	0.0177	39	Nucleotide	Purine Metabolism, Adenine containing
adenosine 5'-monophosphate (AMP)	32342	Lifespan	0.44798	0.0115	31	Nucleotide	Purine Metabolism, Adenine containing
N1-methyladenosine	15650	Free Glucose	-0.33208	0.0363	40	Nucleotide	Purine Metabolism, Adenine containing
N1-methyladenosine	15650	Total Protein	-0.32008	0.0441	40	Nucleotide	Purine Metabolism, Adenine containing
N1-methyladenosine	15650	Lifespan	0.37298	0.0388	31	Nucleotide	Purine Metabolism, Adenine containing
2'-deoxyguanosine	1411	Starvation Resistance	-0.3652	0.0222	39	Nucleotide	Purine Metabolism, Guanine containing
2'-deoxyguanosine	1411	Thorax Width	0.32299	0.0449	39	Nucleotide	Purine Metabolism, Guanine containing
7-methylguanine	35114	Total Protein	-0.31689	0.0463	40	Nucleotide	Purine Metabolism, Guanine containing
guanosine-2',3'-cyclic monophosphate	37139	Starvation Resistance	-0.33149	0.0393	39	Nucleotide	Purine Metabolism, Guanine containing
cytidine	514	Starvation Resistance	-0.41166	0.0092	39	Nucleotide	Pyrimidine Metabolism, Cytidine containing
cytidine 2',3'-cyclic monophosphate	37465	Starvation Resistance	-0.34789	0.03	39	Nucleotide	Pyrimidine Metabolism, Cytidine containing
cytosine	573	Lifespan	-0.4504	0.011	31	Nucleotide	Pyrimidine Metabolism, Cytidine containing
cytosine	573	Waking Activity	0.40337	0.0133	37	Nucleotide	Pyrimidine Metabolism, Cytidine containing
orotate	1505	Startle Response	-0.41749	0.0074	40	Nucleotide	Pyrimidine Metabolism, Orotate containing
3-aminoisobutyrate	1566	Waking Activity	0.45103	0.0051	37	Nucleotide	Pyrimidine Metabolism, Thymine containing
thymidine	2183	Body Weight	0.34007	0.0318	40	Nucleotide	Pyrimidine Metabolism, Thymine containing
N-acetyl-beta-alanine	37432	Triglyceride	-0.33021	0.0374	40	Nucleotide	Pyrimidine Metabolism, Uracil containing
pseudouridine	33442	Free Glycerol	-0.32064	0.0437	40	Nucleotide	Pyrimidine Metabolism, Uracil containing
pseudouridine	33442	Startle Response	0.41073	0.0085	40	Nucleotide	Pyrimidine Metabolism, Uracil containing
pseudouridine	33442	Triglyceride	-0.32758	0.0391	40	Nucleotide	Pyrimidine Metabolism, Uracil containing
uracil	605	Aggression	0.51801	0.0006	40	Nucleotide	Pyrimidine Metabolism, Uracil containing
uracil	605	Waking Activity	0.39649	0.0151	37	Nucleotide	Pyrimidine Metabolism, Uracil containing
uridine-2',3'-cyclic monophosphate	37137	Starvation Resistance	-0.33028	0.04	39	Nucleotide	Pyrimidine Metabolism, Uracil containing
alanylleucine	37093	Total Protein	0.33358	0.0354	40	Peptide	Dipeptide
glycylisoleucine	36659	Waking Activity	0.41582	0.0105	37	Peptide	Dipeptide
glycylleucine	34398	Thorax Length	-0.32289	0.045	39	Peptide	Dipeptide
glycylleucine	34398	Waking Activity	0.39815	0.0147	37	Peptide	Dipeptide
glycylvaline	18357	Waking Activity	0.43585	0.007	37	Peptide	Dipeptide
phenylalanylglycine	41370	Waking Activity	0.36009	0.0286	37	Peptide	Dipeptide
4-hydroxyhippurate	35527	Triglyceride	0.3636	0.0211	40	Xenobiotics	Benzoate Metabolism
methyl-4-hydroxybenzoate	34386	Thorax Length	-0.45832	0.0033	39	Xenobiotics	Benzoate Metabolism
methyl-4-hydroxybenzoate	34386	Thorax Width	-0.45741	0.0034	39	Xenobiotics	Benzoate Metabolism
glycerol 2-phosphate	27728	Glycogen	-0.3364	0.0338	40	Xenobiotics	Chemical
succinimide	41888	Thorax Width	0.32684	0.0423	39	Xenobiotics	Chemical
sulfate*	46960	Thorax Width	-0.45802	0.0034	39	Xenobiotics	Chemical
valylleucinamide	37460	Thorax Length	-0.37472	0.0188	39	Xenobiotics	Chemical
valylleucinamide	37460	Total Protein	-0.44015	0.0045	40	Xenobiotics	Chemical
1-kestose	22012	Thorax Length	-0.41611	0.0084	39	Xenobiotics	Food Component/Plant
1-kestose	22012	Thorax Width	-0.32562	0.0431	39	Xenobiotics	Food Component/Plant
erythritol	20699	Starvation Resistance	-0.42927	0.0064	39	Xenobiotics	Food Component/Plant
gluconate	587	Aggression	-0.35272	0.0256	40	Xenobiotics	Food Component/Plant
gluconate	587	Thorax Length	-0.38686	0.015	39	Xenobiotics	Food Component/Plant
kojibiose	21040	Free Glucose	0.42525	0.0062	40	Xenobiotics	Food Component/Plant
panose	37284	Free Glucose	0.36023	0.0224	40	Xenobiotics	Food Component/Plant
quinate	18335	Starvation Resistance	-0.37127	0.02	39	Xenobiotics	Food Component/Plant
quinate	18335	Thorax Length	-0.36803	0.0212	39	Xenobiotics	Food Component/Plant
stachydrine	34384	Waking Activity	0.34634	0.0357	37	Xenobiotics	Food Component/Plant
1-methylurate	34395	Free Glucose	-0.44484	0.004	40	Xenobiotics	Xanthine Metabolism
1-methylurate	34395	Total Protein	-0.34953	0.0271	40	Xenobiotics	Xanthine Metabolism

## Sheet: C. Female MMC
Module	PC	Trait	Spearman Correlation Coefficient	P-value	Number of Lines
1	1	Free Glycerol	0.41163	0.0083	40
1	1	Triglyceride	0.32326	0.0419	40
1	2	Free Glycerol	0.38574	0.014	40
1	2	Total Protein	0.34991	0.0269	40
2	3	Lifespan	0.48185	0.0061	31
3	2	Thorax Width	-0.37615	0.0183	39
3	3	Glycogen	0.34315	0.0302	40
3	3	Starvation Resistance	0.34386	0.0321	39
3	5	Free Glycerol	0.45516	0.0032	40
3	5	Triglyceride	0.38368	0.0145	40
3	5	Waking Activity	0.55188	0.0004	37
4	1	Free Glycerol	0.3227	0.0423	40
4	2	Glycogen	0.32477	0.0409	40
4	2	Thorax Width	-0.31876	0.048	39
4	6	Total Protein	-0.32552	0.0404	40
4	7	Lifespan	0.3996	0.0259	31
4	11	Free Glucose	-0.33471	0.0348	40
4	11	Free Glycerol	-0.32589	0.0402	40
4	11	Starvation Resistance	-0.38911	0.0144	39
4	11	Thorax Length	-0.36356	0.0229	39
5	4	Starvation Resistance	0.39751	0.0122	39
5	5	Startle Response	-0.46116	0.0027	40
5	5	Thorax Width	0.46725	0.0027	39
6	1	Starvation Resistance	-0.37261	0.0195	39
6	1	Thorax Width	0.31764	0.0488	39
6	2	Glycogen	0.31332	0.049	40
6	4	Waking Activity	0.40937	0.0119	37
7	1	Thorax Width	-0.41118	0.0093	39
7	2	Waking Activity	-0.33687	0.0415	37
7	6	Starvation Resistance	-0.40763	0.01	39
7	9	Glycogen	-0.35647	0.024	40
8	1	Total Protein	0.39925	0.0107	40
8	2	Thorax Length	-0.42146	0.0075	39
9	2	Free Glucose	-0.34953	0.0271	40
9	3	Lifespan	-0.3754	0.0374	31
9	4	Starvation Resistance	-0.36471	0.0224	39
11	1	Thorax Width	-0.32422	0.044	39
11	3	Lifespan	0.38548	0.0322	31
11	3	Waking Activity	-0.35764	0.0298	37
12	2	Body Weight	-0.32777	0.039	40
12	2	Free Glucose	-0.37148	0.0183	40
12	2	Starvation Resistance	-0.37372	0.0191	39
12	2	Thorax Length	-0.34696	0.0305	39
12	2	Thorax Width	-0.37079	0.0201	39
12	2	Total Protein	-0.32326	0.0419	40
12	3	Free Glucose	0.31201	0.05	40
12	5	Startle Response	-0.44203	0.0043	40
13	1	Body Weight	-0.34165	0.031	40
13	2	Free Glucose	0.31689	0.0463	40
14	1	Starvation Resistance	-0.40338	0.0109	39
14	2	Total Protein	-0.38818	0.0133	40
14	3	Waking Activity	-0.42124	0.0094	37
14	5	Starvation Resistance	-0.34082	0.0337	39
14	5	Triglyceride	0.37148	0.0183	40
14	6	Waking Activity	-0.44865	0.0054	37
14	8	Waking Activity	0.3472	0.0353	37
15	1	Free Glycerol	-0.31313	0.0491	40
15	2	Startle Response	-0.39081	0.0127	40
15	3	Glycogen	0.45441	0.0032	40
15	3	Lifespan	0.40685	0.0231	31
15	5	Startle Response	-0.37205	0.0181	40
15	5	Total Protein	0.3167	0.0465	40
16	3	Body Weight	0.34353	0.03	40
16	3	Total Protein	0.37711	0.0165	40
16	5	Starvation Resistance	-0.3474	0.0302	39
16	9	Body Weight	0.46529	0.0025	40
16	9	Free Glucose	0.35084	0.0264	40
16	9	Glycogen	-0.33527	0.0344	40
16	9	Thorax Length	0.35182	0.0281	39
16	9	Thorax Width	0.34072	0.0338	39
17	3	Waking Activity	-0.3275	0.0479	37
17	5	Lifespan	0.44315	0.0125	31
17	5	Thorax Length	0.36296	0.0231	39
18	1	Body Weight	-0.37336	0.0176	40
18	3	Triglyceride	0.3469	0.0283	40
18	4	Waking Activity	-0.40843	0.0121	37
18	6	Free Glucose	-0.45103	0.0035	40
18	6	Starvation Resistance	-0.42737	0.0067	39
18	10	Startle Response	0.36923	0.019	40
19	2	Thorax Length	-0.37247	0.0195	39
19	7	Thorax Length	-0.33036	0.04	39
19	8	Lifespan	0.38911	0.0305	31
19	9	Free Glucose	0.3439	0.0298	40
19	9	Triglyceride	0.36623	0.0201	40
19	13	Starvation Resistance	0.3302	0.0401	39
19	13	Total Protein	0.35141	0.0262	40
19	15	Thorax Width	-0.32149	0.046	39
19	17	Lifespan	0.44153	0.0129	31
19	17	Startle Response	-0.42964	0.0057	40
20	6	Body Weight	0.42158	0.0067	40
20	6	Starvation Resistance	0.57516	0.0001	39
21	1	Free Glucose	0.47861	0.0018	40
21	1	Starvation Resistance	0.36957	0.0206	39
21	2	Body Weight	-0.35666	0.0239	40
21	3	Waking Activity	-0.35859	0.0293	37
21	4	Startle Response	0.33977	0.0319	40
21	5	Starvation Resistance	0.32402	0.0442	39
21	6	Free Glycerol	-0.33752	0.0332	40
21	6	Triglyceride	-0.31614	0.0469	40
21	10	Startle Response	-0.3257	0.0403	40
21	10	Thorax Width	0.41067	0.0094	39
21	11	Glycogen	0.34972	0.027	40
22	1	Lifespan	0.41532	0.0202	31
22	1	Thorax Width	-0.35702	0.0257	39
22	4	Body Weight	-0.31764	0.0458	40
22	4	Free Glucose	-0.40582	0.0094	40
22	4	Starvation Resistance	-0.43446	0.0057	39
22	6	Glycogen	0.36173	0.0218	40
22	6	Thorax Length	-0.45182	0.0039	39
22	8	Starvation Resistance	-0.32382	0.0443	39
22	9	Starvation Resistance	0.37686	0.018	39
22	10	Waking Activity	0.46277	0.0039	37
22	13	Thorax Length	0.38866	0.0145	39
22	13	Thorax Width	0.48436	0.0018	39
22	14	Triglyceride	-0.46923	0.0023	40
22	15	Free Glucose	-0.33827	0.0328	40

## Sheet: D. Male MMC
Module	PC	Trait	Spearman Correlation Coefficient	P-value	Number of Lines
2	1	Free Glycerol	0.36867	0.0192	40
2	1	Starvation Resistance	0.42178	0.0075	40
2	2	Aggression	-0.36961	0.0189	40
2	3	Startle Response	-0.34469	0.0294	40
4	3	Startle Response	0.37733	0.0164	40
5	1	Waking Activity	0.41688	0.0103	37
5	2	Lifespan	0.37782	0.0361	31
5	3	Total Protein	0.3803	0.0155	40
6	2	Triglyceride	-0.33527	0.0344	40
6	3	Starvation Resistance	0.32056	0.0466	40
6	4	Aggression	0.35478	0.0247	40
7	1	Glycogen	0.36529	0.0205	40
7	2	Body Weight	0.31709	0.0462	40
7	4	Total Protein	0.49081	0.0013	40
7	5	Thorax Length	-0.39779	0.0121	39
7	5	Waking Activity	0.37218	0.0233	37
7	6	Free Glucose	-0.34765	0.0279	40
7	7	Lifespan	-0.53468	0.0019	31
7	7	Startle Response	0.37827	0.0161	40
8	3	Free Glucose	-0.3409	0.0313	40
9	1	Triglyceride	-0.32139	0.0432	40
9	2	Thorax Length	0.31823	0.0483	39
9	2	Thorax Width	0.43555	0.0056	39
9	2	Waking Activity	-0.37776	0.0212	37
10	1	Glycogen	-0.33283	0.0359	40
10	1	Thorax Length	-0.4896	0.0016	39
10	1	Thorax Width	-0.56956	0.0002	39
11	2	Total Protein	-0.33377	0.0353	40
11	3	Starvation Resistance	-0.31864	0.048	40
11	4	Free Glucose	0.38236	0.0149	40
11	5	Free Glucose	-0.40901	0.0088	40
11	5	Free Glycerol	-0.40394	0.0097	40
11	5	Triglyceride	-0.31764	0.0458	40
11	6	Waking Activity	-0.3359	0.0421	37
11	7	Glycogen	-0.34765	0.0279	40
11	7	Waking Activity	-0.34657	0.0356	37
12	1	Startle Response	-0.35097	0.0264	40
12	2	Startle Response	-0.32057	0.0437	40
12	3	Thorax Length	-0.60033	1e-05	39
12	3	Thorax Width	-0.45933	0.0033	39
12	3	Waking Activity	0.32926	0.0466	37
14	2	Thorax Width	0.33737	0.0357	39
14	3	Starvation Resistance	-0.3572	0.0256	40
15	1	Free Glycerol	0.51388	0.0007	40
15	1	Starvation Resistance	0.50762	0.001	40
15	5	Glycogen	0.3439	0.0298	40
16	1	Starvation Resistance	-0.35214	0.0279	40
16	5	Waking Activity	-0.4649	0.0037	37
17	1	Aggression	0.41632	0.0075	40
17	1	Free Glucose	-0.37392	0.0175	40
17	1	Lifespan	0.44113	0.013	31
17	2	Body Weight	0.42516	0.0062	40
17	4	Starvation Resistance	-0.46348	0.003	40
17	5	Total Protein	0.36154	0.0219	40
17	5	Waking Activity	-0.33401	0.0433	37
17	6	Free Glycerol	-0.31839	0.0453	40
18	1	Aggression	0.42852	0.0058	40
18	1	Free Glucose	-0.45797	0.003	40
18	4	Body Weight	0.35855	0.0231	40
18	4	Thorax Length	0.39708	0.0123	39
18	4	Thorax Width	0.31611	0.0499	39
20	1	Lifespan	0.37903	0.0355	31
20	1	Thorax Length	0.36176	0.0236	39
20	2	Total Protein	-0.3364	0.0338	40
20	4	Free Glucose	-0.43321	0.0052	40
21	2	Starvation Resistance	-0.40538	0.0105	40
21	2	Triglyceride	0.3439	0.0298	40
21	3	Thorax Width	0.35133	0.0283	39
21	4	Free Glycerol	-0.36848	0.0193	40
21	4	Starvation Resistance	-0.3239	0.0443	40
21	6	Lifespan	-0.40927	0.0222	31
21	9	Waking Activity	-0.33377	0.0435	37
22	2	Starvation Resistance	0.44122	0.0049	40
22	3	Starvation Resistance	-0.33079	0.0397	40
22	3	Thorax Width	0.36662	0.0217	39
22	3	Total Protein	0.3242	0.0413	40
22	5	Body Weight	-0.46503	0.0025	40
22	5	Thorax Length	-0.46905	0.0026	39
22	5	Thorax Width	-0.41642	0.0084	39
23	2	Free Glycerol	0.35103	0.0264	40
23	2	Total Protein	0.50938	0.0008	40
23	4	Total Protein	-0.32308	0.042	40
24	1	Starvation Resistance	-0.34152	0.0334	40
24	1	Thorax Length	-0.42462	0.0071	39
24	2	Body Weight	0.35077	0.0265	40
24	2	Thorax Width	0.40407	0.0107	39
24	7	Aggression	0.33546	0.0343	40
24	7	Starvation Resistance	-0.38656	0.0151	40
24	10	Free Glycerol	-0.32214	0.0426	40
24	10	Glycogen	-0.39981	0.0106	40
24	10	Triglyceride	-0.38368	0.0145	40
24	11	Lifespan	0.49395	0.0047	31
25	2	Free Glucose	-0.33377	0.0353	40
25	4	Aggression	0.37711	0.0165	40
25	6	Waking Activity	0.36151	0.0279	37
26	2	Starvation Resistance	-0.41227	0.0091	40
26	7	Free Glucose	0.32214	0.0426	40
26	7	Lifespan	-0.44315	0.0125	31
27	2	Glycogen	-0.35704	0.0237	40
27	3	Starvation Resistance	-0.33038	0.04	40
27	3	Thorax Length	0.31621	0.0499	39
27	3	Thorax Width	0.40346	0.0109	39
28	3	Body Weight	-0.40068	0.0104	40
28	3	Total Protein	-0.44465	0.004	40
28	6	Free Glucose	-0.34353	0.03	40
29	1	Free Glucose	-0.40788	0.009	40
29	2	Total Protein	0.32814	0.0387	40
29	6	Free Glucose	0.36679	0.0199	40
30	1	Aggression	0.35441	0.0248	40
30	1	Glycogen	-0.35385	0.0251	40
30	2	Waking Activity	-0.39424	0.0158	37
30	6	Free Glycerol	-0.3182	0.0454	40
30	6	Thorax Length	-0.32279	0.045	39
30	8	Starvation Resistance	-0.4563	0.0035	40
31	1	Free Glycerol	0.33133	0.0368	40
31	3	Free Glucose	0.34653	0.0285	40
31	3	Thorax Length	0.32856	0.0411	39
32	5	Waking Activity	-0.37112	0.0237	37
32	7	Lifespan	0.4125	0.0211	31
32	7	Triglyceride	0.38049	0.0154	40
32	10	Thorax Width	0.49527	0.0013	39
32	11	Startle Response	0.31485	0.0478	40
32	12	Lifespan	0.37298	0.0388	31
32	14	Aggression	0.39568	0.0115	40
32	14	Triglyceride	0.36585	0.0203	40
33	1	Free Glucose	0.46717	0.0024	40
33	2	Starvation Resistance	0.32987	0.0403	40
33	3	Thorax Length	0.41976	0.0078	39
33	3	Total Protein	0.3469	0.0283	40
33	4	Starvation Resistance	0.40397	0.0108	40
33	5	Lifespan	0.56331	0.001	31
33	8	Free Glycerol	0.34803	0.0278	40
33	8	Starvation Resistance	0.42715	0.0067	40
33	8	Total Protein	0.3469	0.0283	40
33	10	Aggression	0.3409	0.0313	40
33	11	Free Glucose	0.34109	0.0312	40
