# Supplementary material for: Systems genetics of the Drosophila metabolome
Source: Genome Res. 2020 Mar;30(3):392–405. doi: 10.1101/gr.243030.118 (PMC7111526; doi:10.1101/gr.243030.118)
Supplement: Supplemental Material [file supp_gr.243030.118_Supplemental_Table_S10.xlsx.xlsx]

## Sheet: A. Females
Supplemental Table S10. Pairwise Spearman's correlations across 12 traits. (A) Females. (B) Males.
Trait 1	Trait 2	Spearman's ρ	P-value
Triglyceride	Free Glycerol	0.8302	<.0001
Protein	Body Weight	0.7961	<.0001
Thorax Width	Thorax Lenth	0.6826	<.0001
Glycogen	Free Glucose	-0.56	0.0002
Protein	Free Glycerol	0.4946	0.0012
Free Glycerol	Body Weight	0.4876	0.0014
Thorax Lenth	Free Glucose	0.4662	0.0028
Triglyceride	Protein	0.4024	0.01
Thorax Width	Free Glucose	0.4055	0.0104
Thorax Width	Glycogen	-0.3856	0.0153
Starvation Resistance	Free Glucose	0.3756	0.0184
Thorax Lenth	Body Weight	0.3613	0.0238
Virgin Lifespan	Starvation Resistance	0.3802	0.0382
Thorax Width	Body Weight	0.3263	0.0426
Thorax Lenth	Glycogen	-0.3225	0.0453
Triglyceride	Body Weight	0.3148	0.0479
Waking Activity	Triglyceride	0.2532	0.1305
Virgin Lifespan	Thorax Width	-0.2808	0.1328
Free Glucose	Body Weight	0.2345	0.1452
Thorax Width	Protein	0.22	0.1785
Starvation Resistance	Free Glycerol	0.2151	0.1885
Starvation Resistance	Body Weight	0.2065	0.2072
Thorax Lenth	Protein	0.203	0.2151
Startle Response	Glycogen	0.1932	0.2322
Waking Activity	Free Glycerol	0.2011	0.2326
Thorax Lenth	Starvation Resistance	0.1975	0.2346
Startle Response	Free Glycerol	-0.1814	0.2626
Free Glycerol	Free Glucose	0.1801	0.2661
Waking Activity	Thorax Lenth	-0.179	0.2963
Triglyceride	Startle Response	-0.145	0.3719
Virgin Lifespan	Triglyceride	-0.1552	0.4043
Triglyceride	Glycogen	0.1287	0.4287
Waking Activity	Free Glucose	-0.1253	0.4599
Glycogen	Free Glycerol	0.1139	0.4841
Startle Response	Protein	-0.1107	0.4965
Waking Activity	Body Weight	0.1153	0.4967
Triglyceride	Free Glucose	0.1098	0.5002
Virgin Lifespan	Glycogen	0.1254	0.5015
Waking Activity	Startle Response	-0.1126	0.507
Waking Activity	Protein	0.1105	0.5151
Triglyceride	Thorax Lenth	-0.103	0.5325
Thorax Lenth	Free Glycerol	0.102	0.5366
Thorax Width	Startle Response	-0.1013	0.5394
Virgin Lifespan	Body Weight	-0.1109	0.5526
Virgin Lifespan	Free Glycerol	-0.1048	0.5746
Virgin Lifespan	Protein	-0.0984	0.5985
Startle Response	Free Glucose	-0.0856	0.5997
Starvation Resistance	Startle Response	0.0815	0.6219
Waking Activity	Glycogen	0.0822	0.6285
Starvation Resistance	Glycogen	0.0769	0.6416
Triglyceride	Thorax Width	-0.0721	0.6628
Thorax Width	Free Glycerol	0.0706	0.6695
Waking Activity	Virgin Lifespan	-0.0841	0.6705
Startle Response	Body Weight	-0.0582	0.7215
Waking Activity	Starvation Resistance	-0.0581	0.7364
Thorax Lenth	Startle Response	0.0496	0.7643
Starvation Resistance	Protein	0.0444	0.7882
Virgin Lifespan	Thorax Lenth	0.0461	0.8091
Glycogen	Body Weight	0.0268	0.8695
Waking Activity	Thorax Width	-0.0236	0.8914
Protein	Glycogen	0.0199	0.9031
Protein	Free Glucose	0.0169	0.9176
Thorax Width	Starvation Resistance	-0.0165	0.9216
Virgin Lifespan	Startle Response	-0.0169	0.928
Virgin Lifespan	Free Glucose	0.0153	0.9348
Triglyceride	Starvation Resistance	-0.0058	0.9722

## Sheet: B. Males
Trait 1	Trait 2	Spearman's ρ	P-value
Triglyceride	Free Glycerol	0.7448	<.0001
Thorax Width	Thorax Length	0.7168	<.0001
Protein	Body Weight	0.6161	<.0001
Protein	Free Glucose	0.4383	0.0047
Free Glucose	Body Weight	0.4337	0.0052
Thorax Length	Body Weight	0.4301	0.0063
Starvation Resistance	Glycogen	0.3769	0.018
Waking Activity	Thorax Length	-0.3804	0.0221
Thorax Length	Protein	0.3481	0.0299
Thorax Length	Free Glucose	0.3146	0.0511
Virgin Lifespan	Triglyceride	0.3492	0.0542
Free Glycerol	Body Weight	0.302	0.0582
Waking Activity	Thorax Width	-0.3134	0.0627
Starvation Resistance	Free Glycerol	0.2973	0.0661
Triglyceride	Body Weight	0.2849	0.0748
Protein	Free Glycerol	0.2829	0.0769
Waking Activity	Virgin Lifespan	-0.3376	0.0789
Triglyceride	Protein	0.2779	0.0826
Startle Response	Aggression	0.267	0.0958
Thorax Width	Body Weight	0.268	0.099
Startle Response	Free Glycerol	-0.2589	0.1067
Virgin Lifespan	Thorax Length	0.2999	0.1073
Free Glycerol	Free Glucose	0.2255	0.1618
Triglyceride	Free Glucose	0.2086	0.1964
Starvation Resistance	Aggression	-0.191	0.2441
Virgin Lifespan	Free Glucose	-0.2048	0.269
Triglyceride	Aggression	-0.1574	0.332
Waking Activity	Starvation Resistance	0.1625	0.3436
Thorax Width	Aggression	0.1542	0.3488
Free Glycerol	Aggression	-0.1478	0.3626
Thorax Width	Free Glucose	0.148	0.3686
Glycogen	Free Glycerol	0.1443	0.3744
Thorax Length	Aggression	0.1437	0.3827
Virgin Lifespan	Free Glycerol	0.1375	0.4607
Waking Activity	Body Weight	-0.1177	0.4877
Thorax Length	Starvation Resistance	0.116	0.488
Glycogen	Body Weight	0.1063	0.5139
Starvation Resistance	Body Weight	0.1064	0.5192
Triglyceride	Startle Response	-0.1045	0.521
Thorax Width	Glycogen	-0.1025	0.5345
Triglyceride	Thorax Length	0.1016	0.5382
Waking Activity	Protein	-0.1034	0.5426
Startle Response	Glycogen	0.0986	0.545
Startle Response	Free Glucose	0.097	0.5515
Virgin Lifespan	Thorax Width	0.1128	0.5528
Waking Activity	Aggression	0.0956	0.5737
Thorax Length	Free Glycerol	0.0905	0.5838
Thorax Width	Starvation Resistance	-0.0916	0.5844
Thorax Length	Startle Response	0.0876	0.5961
Virgin Lifespan	Startle Response	-0.0974	0.6022
Glycogen	Free Glucose	0.0833	0.6093
Startle Response	Protein	-0.0829	0.6109
Thorax Width	Protein	0.0829	0.6159
Starvation Resistance	Startle Response	-0.0792	0.6319
Waking Activity	Free Glycerol	-0.0799	0.6382
Virgin Lifespan	Body Weight	0.0871	0.6413
Triglyceride	Thorax Width	-0.0676	0.6826
Virgin Lifespan	Glycogen	-0.0738	0.6932
Body Weight	Aggression	-0.0567	0.7284
Thorax Length	Glycogen	0.0537	0.7452
Waking Activity	Glycogen	0.0545	0.7485
Waking Activity	Triglyceride	-0.0545	0.7485
Thorax Width	Startle Response	-0.0478	0.7725
Virgin Lifespan	Protein	0.054	0.7728
Protein	Glycogen	-0.043	0.7924
Glycogen	Aggression	-0.0398	0.8075
Starvation Resistance	Protein	-0.0339	0.8376
Free Glucose	Aggression	0.0306	0.8514
Starvation Resistance	Free Glucose	0.0264	0.8732
Triglyceride	Starvation Resistance	0.0258	0.8761
Startle Response	Body Weight	-0.0248	0.8794
Protein	Aggression	0.0248	0.8794
Triglyceride	Glycogen	0.0193	0.9058
Thorax Width	Free Glycerol	-0.0144	0.9308
Virgin Lifespan	Starvation Resistance	-0.0138	0.9423
Virgin Lifespan	Aggression	0.0133	0.9434
Waking Activity	Free Glucose	0.0079	0.9628
Waking Activity	Startle Response	-0.0011	0.9947
