# Supplementary material for: Systems genetics of the Drosophila metabolome
Source: Genome Res. 2020 Mar;30(3):392–405. doi: 10.1101/gr.243030.118 (PMC7111526; doi:10.1101/gr.243030.118)
Supplement: Supplemental Material [file supp_gr.243030.118_Supplemental_Table_S11.xlsx.xlsx]

## Sheet: S11
Supplementarl Table S11. Variation in transcript abundances across 39 DGRP lines.
	Females			Males
GENE	H2	Line P-Value	Line FDR	H2	Line P-Value	Line FDR
FBgn0000003	0.152008	0.342495	0.692795	0.141015	0.378947	0.620508
FBgn0000008	0.434492	0.0044641	0.0186997	0.702587	2.82575e-07	2.23107e-06
FBgn0000014	0.358208	0.0212914	0.0731271	0.451403	0.00300183	0.00990735
FBgn0000015	0.153113	0.338953	0.687669	0.437392	0.00417633	0.0132894
FBgn0000017	2.65352e-16	1	1	0.0947243	0.555683	0.833891
FBgn0000018	0.65095	3.83822e-06	3.69266e-05	0.224302	0.158241	0.308629
FBgn0000022	0.181177	0.256643	0.560099	0.213071	0.180706	0.343538
FBgn0000024	0.703179	2.73381e-07	3.66281e-06	0.875694	5.52891e-14	2.10278e-12
FBgn0000028	7.68669e-16	1	1	0.351369	0.0240907	0.0623008
FBgn0000032	0.719675	1.05177e-07	1.5738e-06	0.299778	0.0566028	0.130513
FBgn0000036	0.441885	0.00376231	0.0160908	0.592037	4.37415e-05	0.000215308
FBgn0000037	0.103336	0.520136	0.926785	0.146823	0.359413	0.595069
FBgn0000038	0.372717	0.0162444	0.0578919	0.648944	4.20573e-06	2.56522e-05
FBgn0000039	0.234971	0.138847	0.347653	0.499626	0.000861362	0.00320304
FBgn0000042	0.578612	7.13655e-05	0.000488338	0.617518	1.62241e-05	8.7507e-05
FBgn0000043	0.730882	5.28536e-08	8.48291e-07	0.779574	1.70052e-09	2.20312e-08
FBgn0000044	0.584186	5.83919e-05	0.000408522	0.519498	0.000487124	0.00191219
FBgn0000045	0.424162	0.00563422	0.0229088	0.650933	3.84115e-06	2.36486e-05
FBgn0000046	0.574015	8.39773e-05	0.000563576	0.784584	1.13699e-09	1.54363e-08
FBgn0000047	0.50066	0.000836902	0.00427645	0.690763	5.38279e-07	3.98113e-06
FBgn0000052	0.277693	0.0784574	0.220516	0.593881	4.08274e-05	0.000202123
FBgn0000053	0.563147	0.000122207	0.000784783	0.616469	1.69294e-05	9.10227e-05
FBgn0000054	0.66533	1.95303e-06	2.03406e-05	0.104593	0.515039	0.786511
FBgn0000055	0.887287	8.99281e-15	5.54945e-13	0.892527	3.66374e-15	1.80157e-13
FBgn0000057	0.700407	3.18975e-07	4.17122e-06	0.603941	2.78159e-05	0.000142367
FBgn0000061	0.195141	0.221131	0.499865	1.56434e-21	1	1
FBgn0000063	0.544174	0.00022819	0.00136145	0.898986	1.11022e-15	6.18187e-14
FBgn0000064	0.64735	4.52046e-06	4.27135e-05	0.600628	3.16075e-05	0.000159758
FBgn0000071	0.577182	7.50903e-05	0.000510315	0.110581	0.491124	0.75794
FBgn0000075	0.283	0.0726846	0.207092	0.740375	2.87157e-08	2.82164e-07
FBgn0000077	0.606873	2.48106e-05	0.000191608	0	1	1
FBgn0000078	0.896183	1.88738e-15	1.33247e-13	0.907101	2.22045e-16	1.41963e-14
FBgn0000079	0.897614	1.44329e-15	1.03846e-13	0.880678	2.58682e-14	1.05067e-12
FBgn0000083	0.871215	1.06248e-13	5.36269e-12	0.597688	3.53628e-05	0.000177162
FBgn0000084	0.986692	0	0	0.828122	2.05219e-11	4.35174e-10
FBgn0000092	0.353952	0.0229992	0.0781064	0.694707	4.35635e-07	3.29452e-06
FBgn0000094	0.290781	0.0648296	0.188313	0.640656	6.09362e-06	3.58268e-05
FBgn0000097	0.0540562	0.737093	1	0.308285	0.049612	0.116716
FBgn0000099	0.723416	8.39012e-08	1.28617e-06	0.74191	2.5955e-08	2.57188e-07
FBgn0000100	0.0338974	0.833354	1	0.0338235	0.833713	1
FBgn0000108	0.345856	0.0265644	0.0884444	0.442511	0.00370761	0.0119441
FBgn0000109	0.580743	6.6124e-05	0.000456723	0.358264	0.0212695	0.0559951
FBgn0000114	0.722511	8.86478e-08	1.35097e-06	0.702031	2.91475e-07	2.29496e-06
FBgn0000115	0.185459	0.245372	0.540899	0.316191	0.0437558	0.10496
FBgn0000116	0.68246	8.31407e-07	9.5958e-06	0.584901	5.68945e-05	0.000272609
FBgn0000117	0.411053	0.00749469	0.0295291	1.33573e-16	1	1
FBgn0000119	0.605577	2.61004e-05	0.000200372	0.49099	0.00109187	0.0039739
FBgn0000120	0.467267	0.00203057	0.00937573	0.450622	0.0030587	0.0100629
FBgn0000121	0.517942	0.000509998	0.00276167	0.371033	0.0167729	0.0455034
FBgn0000137	0.412521	0.007263	0.0287233	0.248967	0.116148	0.238505
FBgn0000139	0.563981	0.000118792	0.000765763	0.275056	0.0814569	0.177538
FBgn0000140	0.457429	0.00259323	0.0116278	0.763204	5.91143e-09	6.74099e-08
FBgn0000146	0.804425	2.06637e-10	5.51962e-09	0.703175	2.73439e-07	2.16899e-06
FBgn0000147	0.607872	2.38572e-05	0.000185637	0.72633	7.01788e-08	6.32333e-07
FBgn0000150	0	1	1	0.0148608	0.92653	1
FBgn0000152	0.339302	0.0297758	0.0976179	0.257596	0.103621	0.217158
FBgn0000153	0.572877	8.73947e-05	0.00058327	0.726561	6.91846e-08	6.2387e-07
FBgn0000157	0.277175	0.07904	0.221707	0.417258	0.00655687	0.0199463
FBgn0000158	0.928173	0	0	0.152883	0.339688	0.568209
FBgn0000163	0.644759	5.07871e-06	4.72091e-05	0.516551	0.000531269	0.00206904
FBgn0000166	0.580267	6.72641e-05	0.000463273	0.0656962	0.683159	0.969717
FBgn0000173	0.447944	0.00326099	0.0142219	0.0829908	0.605871	0.887679
FBgn0000179	0.424799	0.00555502	0.0226439	0.320254	0.0409719	0.0990354
FBgn0000180	0.605427	2.62539e-05	0.000201413	0.739359	3.06927e-08	2.9972e-07
FBgn0000181	0.573449	8.56607e-05	0.000573395	0.616898	1.6638e-05	8.9527e-05
FBgn0000182	0.236942	0.135466	0.340726	0.310349	0.0480254	0.113516
FBgn0000183	0.264107	0.0948729	0.25683	0.120593	0.452452	0.712058
FBgn0000206	0.586923	5.28439e-05	0.000373463	0.493994	0.00100611	0.00368462
FBgn0000210	0.488073	0.00118127	0.00580543	0.334587	0.0322794	0.0804965
FBgn0000212	0	1	1	0.101575	0.527312	0.801481
FBgn0000216	0.216892	0.172821	0.413551	0	1	1
FBgn0000221	0.344511	0.027199	0.0902728	0.429685	0.00497925	0.0155495
FBgn0000227	0.102577	0.523222	0.93042	1.79473e-17	1	1
FBgn0000228	0.44095	0.00384536	0.0164128	0.321768	0.0399723	0.0969217
FBgn0000229	1.19096e-14	1	1	0.0802125	0.618033	0.90119
FBgn0000233	0.263882	0.095166	0.257499	0.0864236	0.590987	0.871859
FBgn0000239	0.66098	2.40508e-06	2.44242e-05	0.289299	0.066271	0.14931
FBgn0000241	0.810042	1.23079e-10	3.43129e-09	0.8956	2.10942e-15	1.10419e-13
FBgn0000244	0.536229	0.00029317	0.00169792	0.590981	4.54949e-05	0.000222941
FBgn0000246	0.891292	4.55191e-15	2.95455e-13	0.881712	2.20934e-14	9.10373e-13
FBgn0000247	1.55312e-16	1	1	0.268127	0.0897628	0.192501
FBgn0000250	0.726171	7.08699e-08	1.10596e-06	0.219348	0.167886	0.323992
FBgn0000251	0.190713	0.232005	0.518349	0.183208	0.251253	0.448102
FBgn0000253	0.169196	0.289984	0.614128	0.388907	0.0118431	0.0336821
FBgn0000256	0.602021	2.99592e-05	0.0002266	0.540626	0.000255407	0.00106609
FBgn0000257	0.306542	0.0509845	0.153993	0	1	1
FBgn0000259	0.504686	0.000747425	0.00387783	0.332313	0.0335469	0.0831826
FBgn0000261	0.608568	2.32125e-05	0.000181372	0.474198	0.00170165	0.00594254
FBgn0000273	0.264308	0.0946123	0.256268	0.388549	0.0119281	0.0338788
FBgn0000274	0.719366	1.07143e-07	1.60038e-06	0.67296	1.3443e-06	9.12906e-06
FBgn0000276	0.698696	3.50532e-07	4.53306e-06	0.913613	1.11022e-16	7.36052e-15
FBgn0000277	0.789831	7.37298e-10	1.75558e-08	0.808915	1.3675e-10	2.34173e-09
FBgn0000278	0.376024	0.0152479	0.054814	0.420068	0.00616667	0.0188739
FBgn0000279	0.688868	5.95176e-07	7.16011e-06	0.459903	0.00244017	0.00823303
FBgn0000280	0.131588	0.41196	0.788681	0.363478	0.0193245	0.0515034
FBgn0000281	0.770326	3.48101e-09	7.24861e-08	0.466664	0.00206167	0.00706227
FBgn0000283	0.550745	0.000184591	0.00112901	0	1	1
FBgn0000286	0.281796	0.0739635	0.210046	0.965201	0	0
FBgn0000287	0.825683	2.64442e-11	8.25727e-10	0.946609	0	0
FBgn0000289	0.558626	0.000142301	0.000897633	0.264145	0.094823	0.201728
FBgn0000299	0.555601	0.00015737	0.000980613	0.620324	1.4468e-05	7.89116e-05
FBgn0000303	0.530616	0.000348645	0.00197424	0.376027	0.015247	0.0418773
FBgn0000307	0	1	1	0.373975	0.0158589	0.0433275
FBgn0000308	0.442567	0.00370272	0.0158641	0.566464	0.000109135	0.000492581
FBgn0000313	0.60085	3.13401e-05	0.000236042	0.286899	0.0686596	0.153858
FBgn0000316	0.456622	0.00264493	0.0118359	0	1	1
FBgn0000317	0.717379	1.20618e-07	1.77655e-06	0.442448	0.00371304	0.0119604
FBgn0000318	0.434308	0.00448298	0.0187718	0.486443	0.00123402	0.00444522
FBgn0000319	0.48839	0.00117126	0.00576625	0.0307405	0.848687	1
FBgn0000320	0.662361	2.2521e-06	2.30996e-05	0.143324	0.371106	0.610573
FBgn0000326	0.463224	0.00224721	0.0102445	0.38524	0.012739	0.0358766
FBgn0000330	3.99767e-14	1	1	0	1	1
FBgn0000337	0.0608401	0.705489	1	0.187073	0.241212	0.434155
FBgn0000339	0.437318	0.00418348	0.0176841	0.116126	0.469499	0.731991
FBgn0000346	0.795546	4.5354e-10	1.12923e-08	0.312446	0.0464562	0.110354
FBgn0000351	0.619946	1.4694e-05	0.000121316	0.283509	0.0721487	0.160526
FBgn0000352	0.592109	4.36252e-05	0.000314893	0.256712	0.104854	0.219237
FBgn0000355	0.230644	0.146489	0.36281	0.510877	0.000626452	0.00240023
FBgn0000356	0.298472	0.0577421	0.171046	0.257959	0.103118	0.216324
FBgn0000357	0.315275	0.0444044	0.13681	0.0207074	0.897753	1
FBgn0000358	0.453999	0.00281936	0.0125105	0.312667	0.0462929	0.110024
FBgn0000359	0.418422	0.00639274	0.0256628	0.264719	0.0940802	0.200423
FBgn0000360	0.450192	0.00309039	0.0135671	0.323456	0.0388809	0.0946322
FBgn0000370	0.535634	0.000298648	0.0017258	0.304454	0.0526692	0.122814
FBgn0000376	0.0960713	0.550048	0.962812	0	1	1
FBgn0000377	0.0775782	0.629658	1	2.38554e-16	1	1
FBgn0000382	0.390607	0.0114464	0.0427104	0.255287	0.106867	0.222449
FBgn0000384	0.498047	0.000899941	0.00455793	9.46425e-15	1	1
FBgn0000394	0.898119	1.33227e-15	9.62677e-14	0.318267	0.0423149	0.101978
FBgn0000395	0.551199	0.000181882	0.00111406	0.728727	6.04861e-08	5.53784e-07
FBgn0000404	0.667393	1.76735e-06	1.86188e-05	0.411205	0.00747043	0.0223739
FBgn0000405	0.51295	0.000590041	0.00314277	0.228531	0.15033	0.296081
FBgn0000406	0.666377	1.85667e-06	1.94688e-05	0.729675	5.70093e-08	5.2534e-07
FBgn0000409	0.574775	8.17611e-05	0.000550342	0.585544	5.55758e-05	0.000267041
FBgn0000411	0.521985	0.000452463	0.00247989	0.743158	2.38946e-08	2.38463e-07
FBgn0000412	0.563807	0.0001195	0.00076959	0.537638	0.000280552	0.0011601
FBgn0000413	0.514025	0.000571902	0.00305481	0	1	1
FBgn0000414	2.81879e-19	1	1	0.0586643	0.715576	1
FBgn0000416	0.463141	0.00225186	0.0102602	0.11727	0.465102	0.726941
FBgn0000422	0.528491	0.000371996	0.00208966	0.763948	5.59805e-09	6.43172e-08
FBgn0000426	0.177622	0.266258	0.576369	0.520729	0.000469683	0.00184905
FBgn0000427	0.580313	6.71535e-05	0.000462794	0.103272	0.520396	0.792985
FBgn0000439	0.295662	0.0602561	0.177251	0.438454	0.004075	0.0129961
FBgn0000442	0.224484	0.157893	0.385382	0.442569	0.00370253	0.0119299
FBgn0000447	0.372629	0.0162718	0.0579652	0.606835	2.48475e-05	0.000128312
FBgn0000448	0.200506	0.208435	0.47789	0.252895	0.110311	0.228334
FBgn0000449	0.369603	0.0172326	0.0609447	0	1	1
FBgn0000451	0.673275	1.32346e-06	1.44233e-05	0.729814	5.65171e-08	5.21227e-07
FBgn0000454	0.542652	0.000239526	0.00142006	0.820027	4.6905e-11	8.98978e-10
FBgn0000455	0.838701	6.51612e-12	2.28348e-10	0.844943	3.18401e-12	8.23228e-11
FBgn0000459	0.446664	0.0033617	0.0145953	0.0985803	0.539626	0.815542
FBgn0000463	0.480878	0.00143016	0.00687667	0.538667	0.000271657	0.00112687
FBgn0000464	0.54581	0.000216545	0.00129793	0.338888	0.029989	0.0755255
FBgn0000473	0.956299	0	0	0.962869	0	0
FBgn0000477	0.801926	2.58834e-10	6.78001e-09	0.692965	4.78507e-07	3.58139e-06
FBgn0000479	0.420752	0.00607488	0.0245295	0.304641	0.0525164	0.12255
FBgn0000482	0	1	1	0.0314445	0.845263	1
FBgn0000489	0.768741	3.9229e-09	8.0743e-08	0.636717	7.24037e-06	4.18826e-05
FBgn0000490	0.372423	0.0163355	0.0581676	0.246381	0.120116	0.245321
FBgn0000492	0.0859874	0.59287	1	0.216008	0.174622	0.334322
FBgn0000497	0.669995	1.55629e-06	1.66653e-05	0.71063	1.79032e-07	1.48079e-06
FBgn0000499	0.398579	0.00973372	0.0371016	0.2923	0.0633775	0.143991
FBgn0000500	0.307571	0.0501705	0.151863	0.301475	0.0551489	0.127705
FBgn0000504	0.619789	1.47888e-05	0.000121979	0.586594	5.34845e-05	0.000257829
FBgn0000520	0.406931	0.00817968	0.0319193	0	1	1
FBgn0000524	0.484803	0.00128916	0.00626823	0.253051	0.110083	0.227933
FBgn0000527	0.530813	0.00034655	0.00196599	0.661833	2.30945e-06	1.48685e-05
FBgn0000529	0.165625	0.300441	0.629064	0.391455	0.0112529	0.0321644
FBgn0000533	0.416455	0.00667219	0.0266959	0.447843	0.00326882	0.0106728
FBgn0000535	0.0809325	0.614871	1	0.536661	0.000289244	0.00119113
FBgn0000536	0.438824	0.00404022	0.0171385	0.470817	0.00185571	0.00642261
FBgn0000541	0.250632	0.113645	0.296791	0.20947	0.188368	0.355271
FBgn0000542	0.446099	0.00340704	0.0147672	0.21078	0.185555	0.351092
FBgn0000543	0.478975	0.0015033	0.00719584	0.221975	0.162719	0.315647
FBgn0000546	0.745762	2.00753e-08	3.57873e-07	0.370683	0.0168842	0.0457582
FBgn0000547	0.283023	0.0726603	0.20704	0.536758	0.00028837	0.0011881
FBgn0000551	0.328681	0.0356569	0.113659	0.135274	0.398861	0.645823
FBgn0000552	0	1	1	0.226093	0.154855	0.303293
FBgn0000556	0.502505	0.000794778	0.00409025	0.592612	4.28138e-05	0.00021123
FBgn0000557	0.652887	3.51155e-06	3.41924e-05	0.811385	1.08457e-10	1.90314e-09
FBgn0000559	0.445163	0.00348333	0.0150518	0.501467	0.000818245	0.00305939
FBgn0000560	0.212942	0.180976	0.428546	0.54069	0.000254886	0.00106432
FBgn0000562	0.629817	9.73686e-06	8.41696e-05	0.383215	0.0132579	0.0371293
FBgn0000564	0.336638	0.0311701	0.101403	0.0543507	0.735712	1
FBgn0000565	0.308056	0.049791	0.150998	0.787746	8.77077e-10	1.22997e-08
FBgn0000566	0.407928	0.00800916	0.031337	0.748703	1.64502e-08	1.70543e-07
FBgn0000567	0.168343	0.292461	0.617594	0.281932	0.0738184	0.163642
FBgn0000568	0.452001	0.00295888	0.0130593	0.514537	0.000563452	0.0021829
FBgn0000575	0.616349	1.7012e-05	0.000138093	0.563299	0.000121576	0.000543481
FBgn0000576	0.15288	0.339698	0.688662	0	1	1
FBgn0000577	0.168645	0.291582	0.616314	0.659295	2.60469e-06	1.6628e-05
FBgn0000578	0.493205	0.00102804	0.00513441	0.345665	0.0266536	0.0681428
FBgn0000579	0.461036	0.0023728	0.0107274	0.591742	4.42254e-05	0.000217282
FBgn0000581	0	1	1	0.0123918	0.938711	1
FBgn0000588	0.558024	0.000145194	0.000914373	0.0535117	0.739649	1
FBgn0000591	0	1	1	0	1	1
FBgn0000592	0.717856	1.17249e-07	1.73068e-06	0.754528	1.09969e-08	1.18552e-07
FBgn0000594	0.473476	0.00173354	0.00814551	0.736654	3.65866e-08	3.51894e-07
FBgn0000611	0.496767	0.000932335	0.00470719	0.033606	0.834767	1
FBgn0000615	0.608476	2.32963e-05	0.000181901	0.826891	2.3335e-11	4.88444e-10
FBgn0000617	4.13874e-22	1	1	0.162175	0.310767	0.53019
FBgn0000618	0.363191	0.0194276	0.0675491	0	1	1
FBgn0000625	0.186772	0.241984	0.535022	0.143493	0.370536	0.610077
FBgn0000629	0.761198	6.83932e-09	1.34546e-07	0.101708	0.526768	0.800869
FBgn0000633	0.501144	0.000825659	0.00422666	0.50871	0.000666637	0.00253821
FBgn0000635	0.655816	3.06609e-06	3.03886e-05	0.355127	0.0225167	0.0588422
FBgn0000636	0.719283	1.07682e-07	1.60681e-06	0.540909	0.000253129	0.00105852
FBgn0000639	0.230514	0.146722	0.363336	0.117098	0.465764	0.727765
FBgn0000640	0.253834	0.108949	0.286986	0.099752	0.534791	0.809743
FBgn0000644	0.279336	0.0766334	0.21623	0.00904828	0.955229	1
FBgn0000658	0.748896	1.62349e-08	2.94853e-07	0.592796	4.25202e-05	0.000209873
FBgn0000659	0.465899	0.0021017	0.00966718	0.301781	0.0548899	0.127209
FBgn0000662	0.541983	0.000244666	0.00144648	0	1	1
FBgn0000667	0.468908	0.00194802	0.00902783	0.667315	1.774e-06	1.17156e-05
FBgn0000709	0	1	1	0.156192	0.329205	0.554346
FBgn0000711	0.248338	0.117103	0.303913	0.0680367	0.672488	0.958884
FBgn0000715	0.471884	0.00180579	0.00844625	0.649685	4.06626e-06	2.48951e-05
FBgn0000719	0.656233	3.00707e-06	2.98913e-05	0.532848	0.000325547	0.00132398
FBgn0000721	0.680928	8.99481e-07	1.02867e-05	0.563675	0.000120037	0.000537374
FBgn0000723	0.702834	2.78717e-07	3.71663e-06	0.781836	1.41972e-09	1.87446e-08
FBgn0000808	0.477085	0.00157916	0.00751513	0.451827	0.00297135	0.00981625
FBgn0000810	0.530775	0.000346946	0.00196705	0.0761722	0.635899	0.92058
FBgn0000826	0.53552	0.00029971	0.00173046	0	1	1
FBgn0000927	0.391076	0.011339	0.0423516	0.107928	0.501651	0.770729
FBgn0000928	0.43078	0.00485761	0.0201508	0.0378123	0.814425	1
FBgn0000964	0.76669	4.57215e-09	9.30863e-08	0.242394	0.126431	0.256041
FBgn0000996	0.517502	0.000516644	0.00279318	0.0458966	0.775672	1
FBgn0001075	0.749148	1.59572e-08	2.9012e-07	0.874937	6.18394e-14	2.32851e-12
FBgn0001077	0.139815	0.38306	0.749866	0.576003	7.82925e-05	0.000363682
FBgn0001078	0.704973	2.4719e-07	3.35039e-06	0.455687	0.00270598	0.00902442
FBgn0001079	0.348284	0.0254503	0.0853144	0.205747	0.196528	0.367589
FBgn0001083	0.75458	1.09569e-08	2.08616e-07	0.633304	8.39035e-06	4.79567e-05
FBgn0001084	0.612657	1.97355e-05	0.000157219	0.0293347	0.855533	1
FBgn0001085	0.834478	1.04005e-11	3.48743e-10	0.485521	0.00126475	0.00454439
FBgn0001086	0.611756	2.04578e-05	0.000162399	0.650782	3.8678e-06	2.37997e-05
FBgn0001087	0.610519	2.14887e-05	0.000169509	0	1	1
FBgn0001089	0.770908	3.33076e-09	6.98736e-08	0.789279	7.72113e-10	1.0963e-08
FBgn0001090	0.276852	0.079404	0.222469	0.20137	0.206439	0.382847
FBgn0001091	0.483928	0.00131949	0.00640183	0.591637	4.43988e-05	0.00021804
FBgn0001092	0.733798	4.39409e-08	7.24564e-07	0.508888	0.000663262	0.00252649
FBgn0001098	0.400455	0.00936431	0.0358744	0.586251	5.41588e-05	0.000260674
FBgn0001099	0.340961	0.028934	0.0952273	0.763789	5.66376e-09	6.49626e-08
FBgn0001104	0.648142	4.36148e-06	4.13723e-05	0.410709	0.00754988	0.0225682
FBgn0001105	0.254639	0.107792	0.284649	0.0728827	0.650598	0.935697
FBgn0001108	0.488268	0.00117509	0.00578089	0.435525	0.00435973	0.0138099
FBgn0001112	0.560511	0.000133588	0.000849911	0.824918	2.86077e-11	5.87267e-10
FBgn0001114	0.553263	0.000169987	0.00104994	0.583233	6.04472e-05	0.000287822
FBgn0001120	0.64397	5.26084e-06	4.86614e-05	0.125866	0.432768	0.688269
FBgn0001122	0.337856	0.030526	0.0996717	0.227906	0.151481	0.297884
FBgn0001123	0.126117	0.431844	0.816486	0.414647	0.00693835	0.0209497
FBgn0001124	0.404889	0.0085385	0.0331511	0.488649	0.00116312	0.00421074
FBgn0001125	0.566814	0.000107836	0.000701689	0.718288	1.14267e-07	9.82061e-07
FBgn0001128	0.779895	1.65774e-09	3.67847e-08	0.726578	6.91129e-08	6.23553e-07
FBgn0001133	0.223715	0.159362	0.388065	0	1	1
FBgn0001134	0.185194	0.24606	0.542025	0.28846	0.0670985	0.150905
FBgn0001137	0.621627	1.37128e-05	0.000114134	0.813346	9.001e-11	1.60758e-09
FBgn0001138	0.178797	0.263052	0.570829	0.171453	0.283498	0.492897
FBgn0001139	0.533108	0.000322944	0.00184451	0.0712839	0.657789	0.944037
FBgn0001142	0.921942	0	0	0.805046	1.95298e-10	3.2291e-09
FBgn0001145	0.507137	0.000697246	0.00364376	0.487026	0.0012149	0.00438336
FBgn0001147	9.92044e-16	1	1	0.703031	2.75659e-07	2.18254e-06
FBgn0001148	0.287758	0.0677974	0.195523	0.00964073	0.952301	1
FBgn0001149	0.973297	0	0	0.978455	0	0
FBgn0001150	0.121955	0.447322	0.836027	0.450637	0.00305761	0.0100603
FBgn0001168	0.271583	0.0855409	0.236451	0.243304	0.124968	0.253485
FBgn0001169	0	1	1	7.80766e-21	1	1
FBgn0001170	0	1	1	4.47314e-21	1	1
FBgn0001174	0.00901116	0.955412	1	0	1	1
FBgn0001179	0.615257	1.7779e-05	0.000143355	0.798719	3.44002e-10	5.32844e-09
FBgn0001180	0.309659	0.0485514	0.147849	1.24291e-18	1	1
FBgn0001185	0.578836	7.07977e-05	0.000485041	0.0540755	0.737002	1
FBgn0001186	0.421912	0.00592167	0.0239709	0.621136	1.39932e-05	7.64911e-05
FBgn0001187	0.403042	0.0088746	0.0342633	0.498679	0.000884326	0.00328025
FBgn0001189	0.516647	0.000529774	0.0028564	0.233457	0.141486	0.281807
FBgn0001197	0.710254	1.82958e-07	2.56513e-06	0.11482	0.474549	0.738546
FBgn0001202	0.424779	0.00555758	0.0226516	0	1	1
FBgn0001206	0.420308	0.00613431	0.0247281	0	1	1
FBgn0001208	0.576455	7.7052e-05	0.000522283	0.510936	0.000625382	0.00239684
FBgn0001215	0.625836	1.15143e-05	9.75891e-05	0.595279	3.87367e-05	0.000192705
FBgn0001216	0.6838	7.7582e-07	9.0531e-06	0.813466	8.8987e-11	1.59182e-09
FBgn0001217	0.936324	0	0	0.803323	2.28308e-10	3.70832e-09
FBgn0001218	0.588754	4.94032e-05	0.000351867	0.513066	0.000588063	0.00226727
FBgn0001220	0.338364	0.0302609	0.0988726	0.243809	0.124163	0.252151
FBgn0001222	0.722447	8.89938e-08	1.35502e-06	0.439225	0.00400286	0.0127924
FBgn0001224	0.98695	0	0	0.992464	0	0
FBgn0001225	0.977839	0	0	0.668959	1.63735e-06	1.08977e-05
FBgn0001226	0.889168	6.55032e-15	4.14817e-13	0.419859	0.00619504	0.0189488
FBgn0001227	0.580571	6.6535e-05	0.000459186	0.503626	0.00077011	0.00289467
FBgn0001228	0	1	1	0.864872	2.57461e-13	8.4523e-12
FBgn0001229	0.619018	1.52628e-05	0.000125399	0.257067	0.104359	0.218353
FBgn0001230	0.779902	1.65683e-09	3.67847e-08	0.693312	4.69681e-07	3.52153e-06
FBgn0001233	0.495975	0.000952906	0.00479958	0	1	1
FBgn0001234	0.728538	6.12034e-08	9.67157e-07	0.822074	3.82083e-11	7.53923e-10
FBgn0001235	0.36412	0.0190956	0.0666071	0.313718	0.0455246	0.108447
FBgn0001247	0.457131	0.00261223	0.0117035	0.289127	0.06644	0.149649
FBgn0001248	0.306964	0.0506498	0.153109	0.359461	0.0208093	0.0549193
FBgn0001250	0.646899	4.61338e-06	4.34933e-05	0.71295	1.56502e-07	1.30861e-06
FBgn0001253	0.252925	0.110267	0.289827	0.311505	0.0471549	0.111761
FBgn0001254	0.237725	0.134141	0.338172	0	1	1
FBgn0001255	0.498405	0.000891068	0.00451638	0.593868	4.08469e-05	0.00020217
FBgn0001256	0.232355	0.14343	0.356715	0.503858	0.00076511	0.00287682
FBgn0001257	0.556091	0.000154834	0.000967317	0.657883	2.78356e-06	1.76442e-05
FBgn0001258	0.645788	4.84989e-06	4.53815e-05	0.578153	7.25421e-05	0.000338957
FBgn0001259	0.530214	0.000352952	0.00199628	0.559307	0.000139098	0.000613755
FBgn0001263	0.288491	0.0670681	0.193767	0.501313	0.000821765	0.00307054
FBgn0001269	0.228014	0.151282	0.372201	0.65333	3.44065e-06	2.14071e-05
FBgn0001276	0.451499	0.00299486	0.0131923	0	1	1
FBgn0001280	0.528616	0.000370579	0.00208383	0.723381	8.40813e-08	7.44184e-07
FBgn0001281	0.395268	0.0104164	0.0393403	0.726569	6.91517e-08	6.23738e-07
FBgn0001285	0.734164	4.2928e-08	7.10919e-07	0.889153	6.55032e-15	3.0205e-13
FBgn0001291	0.538317	0.000274654	0.00160055	0.38137	0.013746	0.0383714
FBgn0001296	0.291809	0.0638442	0.185827	0.16259	0.309515	0.528397
FBgn0001297	0.650457	3.92561e-06	3.77137e-05	0.706836	2.22457e-07	1.80149e-06
FBgn0001301	0.419631	0.00622605	0.025062	0.669983	1.55721e-06	1.04295e-05
FBgn0001308	0.367921	0.0177872	0.0625946	0	1	1
FBgn0001311	0.427493	0.00523082	0.0215091	0.508058	0.000679169	0.00258102
FBgn0001313	9.37203e-15	1	1	0.614856	1.8069e-05	9.64649e-05
FBgn0001314	0.0631369	0.694896	1	0.679711	9.57167e-07	6.71416e-06
FBgn0001315	3.45787e-20	1	1	0.725823	7.24057e-08	6.49821e-07
FBgn0001316	0.364391	0.019	0.0663214	0.413092	0.00717445	0.0215854
FBgn0001319	0.0550017	0.732661	1	0.237988	0.133696	0.26844
FBgn0001320	0.255215	0.106969	0.282829	0.314531	0.0449368	0.107333
FBgn0001321	0.616636	1.68158e-05	0.00013673	0.554535	0.000163014	0.000709998
FBgn0001323	0.13457	0.401344	0.774937	0.259809	0.100581	0.211731
FBgn0001324	0	1	1	0.133765	0.404193	0.652504
FBgn0001325	0.531952	0.000334645	0.00190517	0.169195	0.289988	0.501493
FBgn0001330	0.621635	1.37083e-05	0.000114124	0.0670316	0.677063	0.963648
FBgn0001332	0.506114	0.000717807	0.00373907	0.48651	0.00123182	0.00443821
FBgn0001341	0.609869	2.20497e-05	0.000173408	0.439039	0.00402014	0.0128404
FBgn0001404	0.507927	0.000681728	0.00357205	0.604106	2.76384e-05	0.000141573
FBgn0001491	0.317416	0.0429011	0.13282	0.214506	0.177715	0.339061
FBgn0001565	0.522012	0.000452093	0.00247827	0.444592	0.00353056	0.0114288
FBgn0001612	0.497064	0.000924735	0.00467441	0.152415	0.341187	0.57024
FBgn0001624	0.474107	0.00170565	0.00803676	0.493146	0.00102971	0.00376495
FBgn0001941	0.647629	4.4639e-06	4.22371e-05	0.570006	9.65887e-05	0.000440859
FBgn0001942	0.176558	0.26918	0.581169	0.316022	0.0438749	0.105209
FBgn0001961	0.178411	0.264103	0.572621	0.163024	0.308207	0.526613
FBgn0001965	0.234786	0.139168	0.348328	0	1	1
FBgn0001967	2.43696e-17	1	1	0	1	1
FBgn0001970	0.282088	0.0736517	0.209318	0.255694	0.10629	0.221627
FBgn0001974	0.706377	2.28331e-07	3.12483e-06	0.589043	4.88803e-05	0.000237821
FBgn0001977	0.583598	5.96533e-05	0.00041628	0.326346	0.0370696	0.090853
FBgn0001978	0.79463	4.90768e-10	1.207e-08	0.67965	9.60182e-07	6.73115e-06
FBgn0001981	0.734305	4.25421e-08	7.0591e-07	0.77743	2.01388e-09	2.57512e-08
FBgn0001983	0.168184	0.292923	0.618118	0	1	1
FBgn0001986	0.369437	0.0172865	0.0610845	0.404108	0.00867923	0.0255606
FBgn0001987	0.760836	7.02057e-09	1.37791e-07	0.583854	5.91015e-05	0.000282192
FBgn0001989	0.381378	0.0137438	0.050051	0.529371	0.000362161	0.00146312
FBgn0001990	0.53472	0.000307246	0.00176914	0.354097	0.0229394	0.0597803
FBgn0001991	0.556576	0.000152366	0.000953469	0.58053	6.66316e-05	0.000314184
FBgn0001992	0.127275	0.427594	0.810671	0.351922	0.0238535	0.0617953
FBgn0001994	0.426186	0.00538605	0.0220482	0.143885	0.369216	0.608491
FBgn0001995	0.215333	0.176008	0.419515	0.708554	2.01709e-07	1.64954e-06
FBgn0002021	0.437164	0.00419837	0.0177404	0.410921	0.00751581	0.022492
FBgn0002022	0.451613	0.00298666	0.0131613	0.331652	0.0339235	0.0839818
FBgn0002023	0.322983	0.0391845	0.123048	0.478567	0.00151937	0.00536239
FBgn0002031	0.143062	0.37199	0.734018	0.237796	0.134021	0.269013
FBgn0002036	0.654011	3.33393e-06	3.27268e-05	0.620201	1.45409e-05	7.92435e-05
FBgn0002044	0.115507	0.471889	0.867652	0	1	1
FBgn0002069	0.592984	4.22226e-05	0.000306338	0.329192	0.0353538	0.0870862
FBgn0002121	0.852838	1.22879e-12	4.94104e-11	0.611722	2.04853e-05	0.000107961
FBgn0002174	0.461967	0.00231865	0.010529	0.504658	0.000748035	0.00281728
FBgn0002183	0.558555	0.000142643	0.000899449	0.304404	0.0527093	0.12289
FBgn0002283	0.562429	0.000125215	0.000802275	0.172003	0.281933	0.490751
FBgn0002284	0.12587	0.432756	0.817936	0.0979627	0.542183	0.818172
FBgn0002306	0.597738	3.52948e-05	0.000261919	0.665755	1.91333e-06	1.25627e-05
FBgn0002354	0.418761	0.00634564	0.0254858	0.150392	0.347714	0.579133
FBgn0002413	0.54045	0.000256831	0.00150812	0.0116668	0.942291	1
FBgn0002431	0.292352	0.0633283	0.184587	0.47962	0.00147812	0.00523214
FBgn0002440	0.0155321	0.92322	1	0.0190149	0.906072	1
FBgn0002441	0.543935	0.000229939	0.00136995	0.354532	0.0227599	0.0594001
FBgn0002466	0.554119	0.000165266	0.00102415	0.695794	4.1073e-07	3.1277e-06
FBgn0002521	0.294308	0.0614986	0.180154	1.10654e-14	1	1
FBgn0002522	0.215837	0.174972	0.417555	0.606365	2.53097e-05	0.000130501
FBgn0002524	0.733782	4.39871e-08	7.24909e-07	0.275345	0.0811235	0.176894
FBgn0002525	0.572493	8.85759e-05	0.000589988	0.428211	0.0051473	0.0160099
FBgn0002526	0.627333	1.08138e-05	9.22061e-05	0.662423	2.24539e-06	1.4489e-05
FBgn0002531	0.46288	0.00226659	0.0103204	0.479453	0.00148461	0.0052524
FBgn0002534	0.195186	0.221023	0.499721	0.0213257	0.894716	1
FBgn0002535	0.381474	0.0137182	0.049974	0.270856	0.0864161	0.186557
FBgn0002542	0.637571	6.97609e-06	6.2526e-05	0.671517	1.44392e-06	9.73384e-06
FBgn0002543	0.588922	4.90988e-05	0.000349995	0.623656	1.26094e-05	6.95852e-05
FBgn0002552	0.0906806	0.572758	0.990385	7.73516e-18	1	1
FBgn0002561	0.0448886	0.780477	1	9.06841e-16	1	1
FBgn0002562	0.200447	0.208572	0.478123	0.3378	0.0305553	0.0767475
FBgn0002563	0.842506	4.22673e-12	1.5486e-10	0.96168	0	0
FBgn0002564	0.476898	0.00158688	0.00754869	0.602629	2.92643e-05	0.000148998
FBgn0002565	0.802781	2.39743e-10	6.32895e-09	0.8713	1.04916e-13	3.75944e-12
FBgn0002566	0.507898	0.00068228	0.00357439	0.457222	0.0026064	0.00872822
FBgn0002567	0.739459	3.04922e-08	5.22368e-07	0.518296	0.000504714	0.00197374
FBgn0002569	0.751318	1.37477e-08	2.55584e-07	0.722341	8.95633e-08	7.86407e-07
FBgn0002570	0.802677	2.41987e-10	6.38321e-09	0.77274	2.89659e-09	3.55829e-08
FBgn0002571	0.781488	1.45997e-09	3.28375e-08	0.887427	8.77076e-15	3.94823e-13
FBgn0002573	0.134309	0.402266	0.77618	0.708447	2.02943e-07	1.65804e-06
FBgn0002576	0.2102	0.186796	0.439192	0.0478834	0.766226	1
FBgn0002577	0.788899	7.96998e-10	1.88476e-08	0.818728	5.33533e-11	1.01175e-09
FBgn0002578	0.707287	2.16828e-07	2.98189e-06	0.678413	1.02248e-06	7.11665e-06
FBgn0002579	0.00743725	0.963195	1	0.106008	0.509338	0.779535
FBgn0002590	0.0691589	0.667394	1	0.166275	0.298521	0.513332
FBgn0002592	6.0307e-21	1	1	0.183204	0.251264	0.448102
FBgn0002593	6.89643e-16	1	1	2.60205e-15	1	1
FBgn0002607	0	1	1	0	1	1
FBgn0002609	0.458552	0.00252274	0.0113401	0.603757	2.80152e-05	0.000143323
FBgn0002622	0.182302	0.253648	0.555113	0.155502	0.331374	0.557284
FBgn0002626	0	1	1	0	1	1
FBgn0002629	0.242095	0.126916	0.323955	9.73163e-22	1	1
FBgn0002631	0.194929	0.221645	0.500621	0.100899	0.530079	0.804718
FBgn0002632	0.0904569	0.573709	0.991472	0.0453936	0.778069	1
FBgn0002633	0.420729	0.00607791	0.0245358	0.128421	0.423407	0.676438
FBgn0002638	0.627779	1.06125e-05	9.06501e-05	0.553931	0.000166295	0.000723086
FBgn0002641	0.568953	0.000100175	0.00065728	0.509198	0.000657395	0.0025061
FBgn0002643	0.415168	0.00686081	0.0273212	0.396709	0.0101144	0.0292812
FBgn0002645	0.98012	0	0	0.985963	0	0
FBgn0002673	0.646792	4.63581e-06	4.36683e-05	0.733006	4.62114e-08	4.35013e-07
FBgn0002707	0.775476	2.34558e-09	5.06193e-08	0.0963913	0.548714	0.825505
FBgn0002709	0.323523	0.0388387	0.122098	0.214629	0.177461	0.338691
FBgn0002715	0.585011	5.66667e-05	0.000397655	0.829409	1.79237e-11	3.8511e-10
FBgn0002716	0.267433	0.0906297	0.247803	0.346977	0.026045	0.0667922
FBgn0002719	0.697303	3.78322e-07	4.85345e-06	0.793315	5.49274e-10	8.12044e-09
FBgn0002723	0.671201	1.46658e-06	1.58047e-05	0.23544	0.138037	0.275875
FBgn0002732	0.445142	0.00348501	0.0150572	0.181977	0.254511	0.452519
FBgn0002733	0.733358	4.51889e-08	7.42183e-07	0.384636	0.0128918	0.036232
FBgn0002734	0.4547	0.00277178	0.0123187	0	1	1
FBgn0002735	0.158314	0.322589	0.663282	0.0434112	0.787534	1
FBgn0002736	0.758311	8.4163e-09	1.63665e-07	0.297921	0.0582283	0.133788
FBgn0002772	0.472923	0.00175836	0.00825027	0.668585	1.66756e-06	1.10793e-05
FBgn0002773	0.488871	0.0011562	0.00570043	0.647575	4.47483e-06	2.7138e-05
FBgn0002774	0.434587	0.00445447	0.0186639	0.278662	0.0773773	0.170104
FBgn0002775	0.690882	5.34884e-07	6.53239e-06	0.492463	0.00104903	0.00383026
FBgn0002778	0.632538	8.67078e-06	7.59244e-05	0.609566	2.23155e-05	0.000116472
FBgn0002780	0.628173	1.04379e-05	8.94067e-05	0.170234	0.28699	0.49752
FBgn0002781	0.400198	0.00941429	0.0360261	9.4746e-15	1	1
FBgn0002783	0.315505	0.0442405	0.136454	0	1	1
FBgn0002787	0.560928	0.000131726	0.000839694	0.291816	0.0638372	0.144823
FBgn0002789	0.618054	1.58742e-05	0.000129917	0.701905	2.9353e-07	2.30847e-06
FBgn0002791	0.676812	1.10867e-06	1.23735e-05	0.538907	0.000269613	0.00111955
FBgn0002838	0.254116	0.108542	0.286115	0.573886	8.43562e-05	0.000389408
FBgn0002842	0.305137	0.0521129	0.156788	0.827169	2.26691e-11	4.75665e-10
FBgn0002855	9.45048e-15	1	1	0.709796	1.87839e-07	1.54674e-06
FBgn0002856	0.091365	0.569851	0.986161	0.727388	6.57351e-08	5.96393e-07
FBgn0002862	0.0705582	0.661063	1	0.650852	3.85535e-06	2.37274e-05
FBgn0002863	0.187635	0.239773	0.531175	0.558104	0.000144808	0.000637055
FBgn0002865	0	1	1	0.500071	0.000850751	0.00316911
FBgn0002868	0.603594	2.81922e-05	0.000214098	0.760013	7.44994e-09	8.34555e-08
FBgn0002869	0.484651	0.0012944	0.006291	0.89001	5.66214e-15	2.64676e-13
FBgn0002872	0.916753	0	0	0.784889	1.10907e-09	1.51417e-08
FBgn0002873	0.173626	0.277344	0.594056	0.775403	2.35892e-09	2.96404e-08
FBgn0002878	0.454485	0.00278633	0.0123818	0.142718	0.373156	0.613205
FBgn0002887	0.621305	1.38964e-05	0.00011552	0.724161	8.01724e-08	7.12952e-07
FBgn0002891	0.672748	1.35854e-06	1.47533e-05	0.703787	2.6423e-07	2.10772e-06
FBgn0002899	0.670207	1.5402e-06	1.65192e-05	0.637371	7.03724e-06	4.08102e-05
FBgn0002901	0.683573	7.84978e-07	9.14735e-06	0.575833	7.87663e-05	0.000365684
FBgn0002905	0.886075	1.09912e-14	6.66111e-13	0.902316	6.66134e-16	3.90032e-14
FBgn0002906	0.648224	4.34528e-06	4.12417e-05	0.915139	0	0
FBgn0002914	0.571172	9.27534e-05	0.000614185	0.329022	0.035454	0.0872889
FBgn0002917	0.460699	0.00239267	0.0108086	0.41015	0.0076404	0.0228048
FBgn0002921	0.486975	0.00121655	0.00595976	0.422444	0.00585261	0.0179886
FBgn0002922	0.449111	0.00317143	0.0138815	0.855166	9.18265e-13	2.6906e-11
FBgn0002924	0.482463	0.00137163	0.00662541	0.696304	3.99503e-07	3.04629e-06
FBgn0002926	0.670926	1.48662e-06	1.60003e-05	0.229646	0.148293	0.292849
FBgn0002930	0.217492	0.171606	0.411342	0.211853	0.183273	0.347568
FBgn0002931	0.454064	0.00281494	0.0124974	0.579442	6.92808e-05	0.000325235
FBgn0002932	0.645279	4.9618e-06	4.62878e-05	0.806094	1.77469e-10	2.96451e-09
FBgn0002933	0.0265458	0.869143	1	0	1	1
FBgn0002936	0.16081	0.314917	0.651427	0.450965	0.00303363	0.00999583
FBgn0002937	0.539194	0.000267195	0.00156057	0.556305	0.000153742	0.000672622
FBgn0002938	0.512479	0.000598131	0.00317934	0.29637	0.0596148	0.136562
FBgn0002939	0.908882	2.22045e-16	1.82698e-14	0.883921	1.55431e-14	6.56336e-13
FBgn0002940	0.499371	0.000867481	0.00441535	0.476201	0.00161584	0.00567074
FBgn0002941	0.120824	0.451582	0.84171	0.291651	0.0639952	0.145133
FBgn0002945	0.381083	0.0138232	0.0502969	0.0301122	0.851745	1
FBgn0002948	0.617454	1.62668e-05	0.000132905	0	1	1
FBgn0002962	0.717288	1.21272e-07	1.78463e-06	0.172304	0.281077	0.489622
FBgn0002973	0.596597	3.68566e-05	0.000272135	0.659574	2.57065e-06	1.6423e-05
FBgn0002985	0.23751	0.134503	0.338933	0.171039	0.284682	0.4945
FBgn0002989	0.502513	0.00079461	0.00409001	1.54791e-14	1	1
FBgn0003002	0.138008	0.389304	0.758566	0.204385	0.199576	0.372165
FBgn0003008	0.341636	0.0285971	0.0943115	0.269785	0.087718	0.188949
FBgn0003009	0.828498	1.97298e-11	6.30625e-10	0.884444	1.43219e-14	6.13895e-13
FBgn0003011	0.388721	0.0118872	0.0440875	0.180517	0.258409	0.458302
FBgn0003015	0.733146	4.58017e-08	7.50425e-07	0.525656	0.00040532	0.00161905
FBgn0003016	0.0550668	0.732356	1	0.391508	0.0112409	0.0321383
FBgn0003023	0.450895	0.00303872	0.0133663	0.063055	0.695273	0.981882
FBgn0003028	0.466922	0.00204831	0.0094486	0.218648	0.169281	0.326203
FBgn0003034	0.143269	0.371293	0.73307	0.240913	0.128839	0.260006
FBgn0003041	0.613455	1.91149e-05	0.00015271	0.593919	4.07687e-05	0.000201871
FBgn0003042	0.636872	7.19167e-06	6.4186e-05	0.0644542	0.688846	0.97519
FBgn0003044	0.293159	0.0625683	0.182765	0.0694921	0.665885	0.952138
FBgn0003046	0.957968	0	0	0	1	1
FBgn0003048	0.0721054	0.65409	1	0.174337	0.275349	0.48195
FBgn0003053	0.477499	0.00156226	0.00744307	0.234447	0.139757	0.27885
FBgn0003057	0.231619	0.144741	0.359298	0.506117	0.000717763	0.00271558
FBgn0003060	0.339285	0.0297848	0.0976191	0.111362	0.488049	0.75482
FBgn0003062	0.0990806	0.537559	0.947544	2.67953e-15	1	1
FBgn0003065	0.303537	0.0534227	0.160145	0	1	1
FBgn0003068	0.300273	0.0561756	0.167211	0.244101	0.123698	0.251431
FBgn0003071	0.562701	0.000124069	0.000795686	0.568717	0.000100994	0.000458773
FBgn0003074	0.419029	0.00630853	0.0253518	0.686135	6.8708e-07	4.97019e-06
FBgn0003076	0.605299	2.63849e-05	0.000202097	0.805486	1.87617e-10	3.11503e-09
FBgn0003079	0.682733	8.19809e-07	9.48136e-06	0.101033	0.529529	0.804205
FBgn0003082	0.915632	0	0	0.936693	0	0
FBgn0003086	0.177224	0.267347	0.577987	0.233508	0.141398	0.281713
FBgn0003087	0.775898	2.27001e-09	4.90823e-08	0.678506	1.01769e-06	7.09051e-06
FBgn0003089	0.462689	0.00227737	0.0103625	0.601646	3.03949e-05	0.000153995
FBgn0003090	0.567889	0.000103922	0.000678832	0.590103	4.70005e-05	0.000229494
FBgn0003091	0.38933	0.0117434	0.0436402	0.577944	7.3084e-05	0.000341162
FBgn0003093	0.295365	0.0605266	0.177923	0.233205	0.14193	0.282427
FBgn0003114	0.719219	1.08093e-07	1.61101e-06	0.151658	0.34362	0.573407
FBgn0003116	0.329584	0.0351222	0.112296	0.346555	0.0262395	0.0672152
FBgn0003117	0.591406	4.47817e-05	0.00032214	0.684079	7.6469e-07	5.46985e-06
FBgn0003118	0.481844	0.00139423	0.00672016	0.546072	0.000214731	0.000913303
FBgn0003124	0.669849	1.56748e-06	1.67648e-05	0.764354	5.43358e-09	6.26387e-08
FBgn0003129	0.178453	0.263987	0.572497	0	1	1
FBgn0003130	0	1	1	0.0288162	0.85806	1
FBgn0003132	2.47396e-18	1	1	0.813328	9.01725e-11	1.6088e-09
FBgn0003134	0.696596	3.93201e-07	5.02148e-06	0.734664	4.15758e-08	3.95196e-07
FBgn0003137	0.679189	9.82969e-07	1.11249e-05	0.676786	1.11012e-06	7.68114e-06
FBgn0003138	0.651709	3.707e-06	3.58068e-05	0.230772	0.146258	0.289517
FBgn0003139	0.591368	4.48448e-05	0.000322526	0.0268389	0.867711	1
FBgn0003140	0.041158	0.798328	1	0.757788	8.73559e-09	9.63374e-08
FBgn0003141	0.435824	0.00432989	0.0182233	0.349847	0.0247538	0.0637785
FBgn0003145	0.170883	0.28513	0.606315	0.557893	0.00014583	0.000641053
FBgn0003149	0.573088	8.67529e-05	0.000579215	0.58967	4.77604e-05	0.000232837
FBgn0003159	0.415795	0.00676829	0.0270388	0.382462	0.0134552	0.037617
FBgn0003162	0.649758	4.05289e-06	3.87823e-05	0.668103	1.70726e-06	1.13078e-05
FBgn0003165	0.0465002	0.772799	1	0.331609	0.0339479	0.0840239
FBgn0003169	0.687315	6.4589e-07	7.70987e-06	0.244895	0.122441	0.249294
FBgn0003174	0.56042	0.000133998	0.000851766	0.479242	0.00149282	0.00527815
FBgn0003175	0.44017	0.00391587	0.0166759	0.488634	0.00116359	0.00421198
FBgn0003178	0.430233	0.00491812	0.0203694	0.527492	0.000383446	0.00154034
FBgn0003187	0.634199	8.07371e-06	7.13241e-05	0.74501	2.11149e-08	2.13638e-07
FBgn0003189	0.457613	0.00258155	0.0115829	0.50048	0.000841097	0.00313589
FBgn0003204	0.413804	0.0070655	0.028034	0.144668	0.366589	0.605011
FBgn0003205	0.586642	5.33899e-05	0.000376771	0.0404891	0.80154	1
FBgn0003206	0.403738	0.00874656	0.0338597	0.392041	0.0111208	0.0318162
FBgn0003209	0.26477	0.0940145	0.255057	0.510169	0.000639334	0.00244414
FBgn0003210	0.621825	1.36016e-05	0.000113348	0.0996926	0.535036	0.810077
FBgn0003218	0.87519	5.9508e-14	3.12481e-12	0.325163	0.0378026	0.0923971
FBgn0003227	0.792594	5.8401e-10	1.41795e-08	0.221877	0.16291	0.315909
FBgn0003231	0.680457	9.2143e-07	1.05104e-05	0.694229	4.47027e-07	3.36872e-06
FBgn0003248	0.8871	9.32587e-15	5.72365e-13	0.952789	0	0
FBgn0003249	0.666187	1.87379e-06	1.96301e-05	0.678494	1.01831e-06	7.09342e-06
FBgn0003250	0.684606	7.44064e-07	8.72469e-06	0.664503	2.03237e-06	1.32524e-05
FBgn0003254	0.214224	0.1783	0.423727	0.552902	0.000172017	0.000745685
FBgn0003255	0.806455	1.7169e-10	4.63742e-09	0.735002	4.06866e-08	3.87717e-07
FBgn0003256	0.194834	0.221874	0.500948	0.194237	0.223323	0.40825
FBgn0003257	0.768659	3.947e-09	8.11896e-08	0.405685	0.00839696	0.024813
FBgn0003261	0.73193	4.94729e-08	8.01641e-07	0.527789	0.000380013	0.00152781
FBgn0003267	0.096047	0.55015	0.962812	0	1	1
FBgn0003268	0.673328	1.31993e-06	1.43987e-05	0.597064	3.62093e-05	0.000181057
FBgn0003270	0	1	1	0	1	1
FBgn0003274	0.333151	0.0330751	0.106697	0.058119	0.718111	1
FBgn0003275	0	1	1	0.042834	0.790296	1
FBgn0003277	0.0854877	0.595029	1	0.198751	0.212532	0.39212
FBgn0003278	0.694832	4.32713e-07	5.43753e-06	0.12268	0.444604	0.702759
FBgn0003279	6.68551e-17	1	1	0	1	1
FBgn0003285	0.970116	0	0	0.530509	0.000349784	0.00141613
FBgn0003292	0.780743	1.54949e-09	3.46785e-08	0.752578	1.25999e-08	1.34178e-07
FBgn0003295	0.223358	0.160045	0.389231	0.219625	0.167335	0.323123
FBgn0003300	0.21105	0.184977	0.435975	0.0989739	0.537999	0.813733
FBgn0003301	0.841235	4.89053e-12	1.75566e-10	0.691362	5.21381e-07	3.86578e-06
FBgn0003302	0.494337	0.000996735	0.00499505	0.743952	2.2663e-08	2.27612e-07
FBgn0003308	0.232251	0.143616	0.357002	0.316217	0.0437378	0.104924
FBgn0003310	0.653072	3.48176e-06	3.39727e-05	0.329862	0.0349593	0.086208
FBgn0003312	0.25961	0.100852	0.269863	0	1	1
FBgn0003317	0.699951	3.27105e-07	4.26599e-06	0.0288207	0.858038	1
FBgn0003319	0	1	1	0.0721668	0.653814	0.939213
FBgn0003321	0.543089	0.000236225	0.0014021	0.348359	0.0254165	0.0653526
FBgn0003326	0.505853	0.000723144	0.00376398	0.755812	1.00482e-08	1.09083e-07
FBgn0003328	0.797824	3.72087e-10	9.43243e-09	0.781439	1.46565e-09	1.92541e-08
FBgn0003330	0.474697	0.00167991	0.00792986	3.72662e-16	1	1
FBgn0003334	0.278759	0.0772702	0.2177	0.17136	0.283765	0.493259
FBgn0003339	0.164617	0.303434	0.633723	0.123968	0.439798	0.696778
FBgn0003345	0.380624	0.0139477	0.0506741	0.421673	0.00595293	0.0182656
FBgn0003346	0.58247	6.21365e-05	0.000431827	0.894992	2.44249e-15	1.25162e-13
FBgn0003353	0.742366	2.51827e-08	4.37842e-07	0.322045	0.0397913	0.09654
FBgn0003356	0.732502	4.77131e-08	7.76474e-07	0.75472	1.08504e-08	1.17046e-07
FBgn0003357	0.749486	1.55932e-08	2.84114e-07	0.697185	3.80773e-07	2.91849e-06
FBgn0003358	0.923714	0	0	0.906052	3.33067e-16	2.04872e-14
FBgn0003360	0.661096	2.39189e-06	2.43341e-05	0.635086	7.77043e-06	4.47588e-05
FBgn0003366	0.591847	4.40532e-05	0.000317779	0.552039	0.000176955	0.000765627
FBgn0003371	0.397748	0.00990148	0.0376688	0.593819	4.09219e-05	0.000202512
FBgn0003374	0.122265	0.446161	0.834918	0	1	1
FBgn0003375	0	1	1	0.238092	0.133521	0.268105
FBgn0003377	0	1	1	2.98482e-16	1	1
FBgn0003378	0	1	1	0	1	1
FBgn0003380	0.539427	0.00026524	0.00155068	0.476187	0.00161639	0.0056721
FBgn0003382	0.257857	0.103259	0.275128	0.266863	0.0913462	0.195356
FBgn0003386	0.440526	0.00388359	0.0165551	0.246541	0.119868	0.244927
FBgn0003388	0.523046	0.000438357	0.0024151	0.669849	1.56746e-06	1.04919e-05
FBgn0003390	0.581524	6.42934e-05	0.000445626	0.703161	2.7366e-07	2.17024e-06
FBgn0003391	0.533386	0.000320187	0.00183087	0.410861	0.0075254	0.0225131
FBgn0003392	0.689854	5.64922e-07	6.84239e-06	2.68778e-15	1	1
FBgn0003396	0.0188273	0.906995	1	0.0859524	0.593021	0.873989
FBgn0003401	0.726923	6.7654e-08	1.06116e-06	0.135606	0.397696	0.644364
FBgn0003410	0.700742	3.13109e-07	4.112e-06	0.325358	0.0376807	0.092119
FBgn0003411	0.204875	0.198476	0.460346	0.489782	0.00112814	0.00409541
FBgn0003415	1.37314e-14	1	1	0.277362	0.0788288	0.172694
FBgn0003416	0.553178	0.000170462	0.00105269	0.254825	0.107525	0.223505
FBgn0003423	0.678191	1.03406e-06	1.16369e-05	0.497034	0.000925512	0.00341623
FBgn0003429	0.603851	2.79134e-05	0.000212171	0.709666	1.89244e-07	1.5577e-06
FBgn0003430	0.397416	0.00996912	0.0378878	0.332653	0.033355	0.082743
FBgn0003435	0.27986	0.0760579	0.214921	0.718748	1.1118e-07	9.57224e-07
FBgn0003444	0.592939	4.22931e-05	0.000306718	0.689196	5.84964e-07	4.29886e-06
FBgn0003447	0.652168	3.62971e-06	3.52313e-05	0.415076	0.00687442	0.0207824
FBgn0003448	0.250107	0.11443	0.298401	0.215428	0.175812	0.335977
FBgn0003449	0.00843293	0.958271	1	0	1	1
FBgn0003450	0.41579	0.00676908	0.0270388	0.336543	0.0312204	0.0781933
FBgn0003459	0.787352	9.06115e-10	2.11763e-08	0.50237	0.00079779	0.00298915
FBgn0003460	0.125679	0.43346	0.818946	0.782234	1.37512e-09	1.82122e-08
FBgn0003462	0.0817485	0.611296	1	6.69085e-14	1	1
FBgn0003463	0.696313	3.99295e-07	5.09161e-06	0.714682	1.41426e-07	1.19233e-06
FBgn0003464	0.192384	0.227861	0.511352	0	1	1
FBgn0003475	0	1	1	0.365862	0.0184863	0.0495055
FBgn0003479	0.57754	7.41405e-05	0.000505078	0.38051	0.0139789	0.0389373
FBgn0003480	0.567912	0.000103839	0.000678426	0.41721	0.00656379	0.0199656
FBgn0003482	0.579185	6.99195e-05	0.000479998	0.567116	0.00010672	0.000482637
FBgn0003483	0.605098	2.6592e-05	0.000203453	0.564861	0.000115286	0.000517942
FBgn0003486	0.553807	0.000166974	0.00103322	0.100752	0.530681	0.805238
FBgn0003495	0.656236	3.00665e-06	2.98913e-05	0.483723	0.00132667	0.00474932
FBgn0003499	0.382872	0.0133474	0.0488073	0.302466	0.0543135	0.126088
FBgn0003502	0.683636	7.82445e-07	9.12098e-06	0.518334	0.000504151	0.00197199
FBgn0003507	0.19954	0.210683	0.481755	0.458966	0.00249721	0.00840301
FBgn0003510	0.278573	0.0774763	0.218171	0.28907	0.0664965	0.149749
FBgn0003511	0.339697	0.0295737	0.0970213	0.00372887	0.981542	1
FBgn0003512	0.382695	0.0133939	0.0489522	0.0742024	0.644685	0.929351
FBgn0003513	0.340289	0.0292729	0.0961648	0.029733	0.853592	1
FBgn0003514	0.268721	0.0890259	0.244082	0.13941	0.384454	0.627595
FBgn0003515	0.385574	0.0126549	0.0466077	0.342867	0.0279917	0.0710837
FBgn0003517	0.129422	0.419771	0.800507	0	1	1
FBgn0003520	0.515489	0.000548029	0.00294267	0.345678	0.0266475	0.0681375
FBgn0003525	0.54827	0.000200041	0.00121146	0.22389	0.159026	0.309734
FBgn0003527	0.652065	3.64695e-06	3.5358e-05	0.785321	1.07066e-09	1.46879e-08
FBgn0003545	0.612988	1.94754e-05	0.000155367	0.853977	1.06615e-12	3.0711e-11
FBgn0003557	0.415483	0.00681413	0.0271776	0.586432	5.38021e-05	0.000259103
FBgn0003559	0.731079	5.22006e-08	8.39005e-07	0.50173	0.000812235	0.00303959
FBgn0003567	0.820001	4.70276e-11	1.40117e-09	0.515678	0.000545015	0.00211821
FBgn0003575	0.622514	1.322e-05	0.000110468	0.21561	0.175438	0.335431
FBgn0003598	0.557417	0.000148159	0.00093059	3.99409e-15	1	1
FBgn0003607	0.721219	9.58551e-08	1.4523e-06	0.358153	0.0213128	0.0560744
FBgn0003612	0.51871	0.000498585	0.00270506	0.383058	0.0132987	0.0372282
FBgn0003638	0.0329769	0.837819	1	0.533634	0.000317744	0.00129736
FBgn0003651	0.463185	0.0022494	0.0102504	0.158851	0.320929	0.543598
FBgn0003654	0.0987984	0.538724	0.949053	0.0480818	0.765284	1
FBgn0003655	0.564823	0.000115436	0.000745974	0.273905	0.0827926	0.179851
FBgn0003656	0.415019	0.00688281	0.0273915	0.11767	0.463568	0.725165
FBgn0003660	0.406288	0.00829115	0.0322889	0.322293	0.0396303	0.0962088
FBgn0003676	0.112611	0.483151	0.881696	0	1	1
FBgn0003683	0.155994	0.329826	0.673819	0.0324991	0.840139	1
FBgn0003687	0.597505	3.56085e-05	0.000264015	0.0444801	0.782426	1
FBgn0003701	0.599333	3.32142e-05	0.000248497	0.772649	2.91684e-09	3.5793e-08
FBgn0003710	0.86805	1.662e-13	8.0637e-12	0.490162	0.0011166	0.00405742
FBgn0003714	0.0191501	0.905407	1	0	1	1
FBgn0003716	0	1	1	0.254004	0.108704	0.225584
FBgn0003719	0.285855	0.06972	0.199918	0.551403	0.000180673	0.000780328
FBgn0003720	0.174698	0.274341	0.589153	0.443367	0.00363389	0.0117343
FBgn0003721	0.331933	0.0337631	0.108647	0.631603	9.02447e-06	5.1263e-05
FBgn0003731	0.396324	0.0101943	0.0386265	0.446051	0.00341094	0.0110879
FBgn0003732	0.300021	0.056392	0.167738	0.234307	0.140001	0.279246
FBgn0003733	0.730025	5.5775e-08	8.9011e-07	0.490705	0.00110032	0.00400123
FBgn0003741	0	1	1	3.95877e-15	1	1
FBgn0003742	0.667965	1.71881e-06	1.81811e-05	0.38644	0.0124396	0.0351379
FBgn0003744	0.47736	0.00156793	0.00746694	0.228774	0.149885	0.29541
FBgn0003747	0.118852	0.459056	0.85137	0.484376	0.0013039	0.00467321
FBgn0003748	0.819797	4.79906e-11	1.4261e-09	0.767904	4.17675e-09	4.93862e-08
FBgn0003751	0.49517	0.00097423	0.00489678	2.06091e-15	1	1
FBgn0003861	0.369672	0.0172103	0.0608916	0.380485	0.0139856	0.0389485
FBgn0003862	0.249399	0.115495	0.300646	0.167296	0.29552	0.509147
FBgn0003863	0.760116	7.39504e-09	1.44973e-07	0.701427	3.01439e-07	2.36522e-06
FBgn0003865	0.0880737	0.583891	1	0.217544	0.171501	0.329773
FBgn0003866	0.651338	3.77067e-06	3.63535e-05	0.403561	0.00877888	0.0258162
FBgn0003867	0.443525	0.00362038	0.0155526	0.57968	6.86943e-05	0.000322837
FBgn0003870	0.665689	1.91943e-06	2.00462e-05	0.374035	0.0158407	0.0432882
FBgn0003882	0.647549	4.48007e-06	4.23665e-05	0.225168	0.156596	0.306034
FBgn0003884	0.482538	0.00136892	0.00661608	0.393596	0.0107764	0.0309584
FBgn0003885	0.327498	0.0363672	0.115661	0.370846	0.0168322	0.0456317
FBgn0003886	0.469238	0.00193174	0.00896098	0.864619	2.66454e-13	8.69726e-12
FBgn0003887	0.19442	0.222878	0.503009	0.211623	0.18376	0.348275
FBgn0003888	0.732074	4.90238e-08	7.95508e-07	0.675032	1.21238e-06	8.31275e-06
FBgn0003889	0	1	1	0.703074	2.74994e-07	2.1786e-06
FBgn0003890	0.333765	0.0327332	0.105816	0.402207	0.00903008	0.0264726
FBgn0003891	0.566003	0.000110875	0.000719391	0.754896	1.07168e-08	1.15642e-07
FBgn0003892	0.626518	1.11901e-05	9.51753e-05	0.512441	0.000598793	0.00230592
FBgn0003896	0.291452	0.0641846	0.186661	0.403874	0.00872165	0.0256723
FBgn0003900	0.20155	0.206024	0.474146	0.850943	1.55198e-12	4.3062e-11
FBgn0003916	0.0450471	0.779721	1	0.224048	0.158724	0.309258
FBgn0003920	0.380399	0.0140091	0.0508496	2.06529e-16	1	1
FBgn0003922	0.0647013	0.687713	1	0.220861	0.164896	0.319108
FBgn0003923	0.000898232	0.995553	1	0	1	1
FBgn0003930	0	1	1	5.57917e-23	1	1
FBgn0003931	0.842233	4.36196e-12	1.58953e-10	0.498456	0.000889807	0.00329586
FBgn0003933	0.176365	0.269712	0.581961	0.341172	0.0288285	0.0729805
FBgn0003934	0	1	1	0.146342	0.361005	0.597299
FBgn0003935	0.0420257	0.794167	1	0.108345	0.499987	0.76897
FBgn0003936	7.1434e-14	1	1	2.6299e-17	1	1
FBgn0003938	0	1	1	0.000707929	0.996495	1
FBgn0003941	0.13636	0.395047	0.766499	0.225001	0.156913	0.306478
FBgn0003942	0	1	1	0.108058	0.501131	0.770267
FBgn0003943	0.244566	0.122961	0.316212	0.737437	3.47793e-08	3.35934e-07
FBgn0003944	0.660947	2.40886e-06	2.44553e-05	0.412961	0.00719472	0.0216299
FBgn0003950	0.824145	3.0967e-11	9.5201e-10	0.594697	3.95947e-05	0.000196498
FBgn0003961	0.608202	2.35488e-05	0.000183702	0.825813	2.60907e-11	5.39498e-10
FBgn0003963	0.474866	0.00167258	0.00789637	0.312876	0.0461397	0.109721
FBgn0003964	0.390393	0.0114957	0.0428613	0.271057	0.0861732	0.186139
FBgn0003965	0.423272	0.00574647	0.0233231	0.510968	0.000624803	0.00239526
FBgn0003969	0.654097	3.32083e-06	3.2636e-05	0.318042	0.0424691	0.102284
FBgn0003975	0.462899	0.00226548	0.0103195	0.624371	1.22398e-05	6.76444e-05
FBgn0003977	0	1	1	0.11043	0.49172	0.758755
FBgn0003978	0.672628	1.36664e-06	1.48317e-05	0	1	1
FBgn0003979	0.512857	0.000591636	0.00314977	0.274504	0.082095	0.178598
FBgn0003980	0.319466	0.0415007	0.129098	1.58195e-14	1	1
FBgn0003983	0.382092	0.0135531	0.0494472	0.0318536	0.843274	1
FBgn0003984	0.367337	0.0179833	0.0632228	0.301246	0.0553428	0.128084
FBgn0003996	0.492515	0.00104757	0.00522273	0.440182	0.00391479	0.012538
FBgn0003997	0.695897	4.08431e-07	5.1866e-06	0.303636	0.0533404	0.124142
FBgn0004003	0.325277	0.0377316	0.11925	0.723183	8.51022e-08	7.5204e-07
FBgn0004009	0.144693	0.366505	0.726884	0.180175	0.259329	0.45951
FBgn0004028	0.439979	0.00393335	0.0167461	0.645702	4.86854e-06	2.9286e-05
FBgn0004034	0.413929	0.00704655	0.0279737	0.228418	0.150539	0.296372
FBgn0004045	0.740996	2.75682e-08	4.75649e-07	0.392514	0.0110151	0.0315455
FBgn0004047	0.63899	6.55665e-06	5.90954e-05	0.261978	0.0976687	0.206697
FBgn0004049	0.453178	0.00287599	0.01274	0.150549	0.347203	0.578413
FBgn0004050	0.512168	0.000603536	0.00320212	0.133954	0.403525	0.651795
FBgn0004052	0.201908	0.205202	0.472512	0.627833	1.05884e-05	5.9287e-05
FBgn0004053	0.272195	0.0848107	0.234874	6.66394e-19	1	1
FBgn0004055	0.480483	0.00144506	0.00694341	0.172854	0.279522	0.487625
FBgn0004057	0.353952	0.0229993	0.0781064	0.374523	0.0156934	0.0429338
FBgn0004066	0.506617	0.000707627	0.00369003	0.182063	0.254283	0.452255
FBgn0004087	0.203427	0.201739	0.465998	0.660848	2.42019e-06	1.55404e-05
FBgn0004101	0.263312	0.0959101	0.259119	0.138162	0.388769	0.63294
FBgn0004102	0.0588362	0.714777	1	0.305305	0.0519768	0.121494
FBgn0004103	0.36873	0.0175185	0.0617494	0.444257	0.00355859	0.0115108
FBgn0004106	0.66312	2.17182e-06	2.23439e-05	0.606465	2.521e-05	0.000130046
FBgn0004107	0.59618	3.74413e-05	0.000275834	0.260714	0.0993574	0.20966
FBgn0004108	0.754571	1.09639e-08	2.08616e-07	0.619104	1.52091e-05	8.25287e-05
FBgn0004110	0.0155909	0.92293	1	5.25974e-20	1	1
FBgn0004117	0.563993	0.000118746	0.000765613	0.653664	3.38786e-06	2.11018e-05
FBgn0004118	0.277189	0.0790243	0.221681	0.388959	0.0118309	0.0336556
FBgn0004132	0.0842389	0.600441	1	0.272416	0.0845474	0.183145
FBgn0004133	0.743309	2.36559e-08	4.14064e-07	0.296161	0.0598033	0.136937
FBgn0004143	0.386084	0.0125278	0.0462452	0.0933537	0.561444	0.840353
FBgn0004167	0.455951	0.00268862	0.0120107	0.466154	0.00208826	0.0071476
FBgn0004168	0.423312	0.00574135	0.0233052	0.553633	0.000167932	0.000729563
FBgn0004169	0.466133	0.0020894	0.00961978	0.521991	0.000452374	0.00178793
FBgn0004170	0.145002	0.36547	0.725598	0.290651	0.0649549	0.146959
FBgn0004171	0.319829	0.0412563	0.128456	0.638216	6.78245e-06	3.95086e-05
FBgn0004172	0.063609	0.692725	1	0.967767	0	0
FBgn0004173	0.315486	0.0442542	0.136484	0.333747	0.032743	0.0814737
FBgn0004174	0.0984183	0.540296	0.950782	0.995829	0	0
FBgn0004175	4.41293e-14	1	1	0.699271	3.39607e-07	2.63317e-06
FBgn0004177	0.394291	0.0106256	0.0400185	0.101875	0.526086	0.799939
FBgn0004179	0.368788	0.0174994	0.0616948	0.158455	0.322155	0.545196
FBgn0004181	0.0544509	0.735242	1	0.595721	3.80967e-05	0.000189791
FBgn0004183	0.79874	3.43351e-10	8.7963e-09	3.30294e-16	1	1
FBgn0004185	0.276575	0.0797179	0.223164	3.10978e-17	1	1
FBgn0004186	0.359798	0.0206812	0.0713603	7.10111e-17	1	1
FBgn0004187	0.401632	0.00913873	0.0351426	0.433083	0.00461008	0.0145246
FBgn0004188	0	1	1	0	1	1
FBgn0004189	0.178138	0.264847	0.573936	0.0646341	0.688021	0.974225
FBgn0004190	4.06107e-16	1	1	0	1	1
FBgn0004191	0.853382	1.14853e-12	4.67385e-11	0.598356	3.44759e-05	0.000173203
FBgn0004192	0.0755743	0.638561	1	0.0497565	0.75735	1
FBgn0004197	0.519315	0.000489767	0.00266234	0.820671	4.39879e-11	8.51616e-10
FBgn0004198	0.231732	0.144539	0.358876	0.364771	0.0188661	0.0504568
FBgn0004227	0	1	1	1.61827e-15	1	1
FBgn0004228	0.545201	0.000220818	0.00132119	0.501456	0.000818492	0.00305998
FBgn0004237	0.130002	0.41767	0.797536	0.330406	0.0346418	0.0855364
FBgn0004240	0.740341	2.87801e-08	4.95044e-07	0.788959	7.93026e-10	1.12133e-08
FBgn0004242	0.326685	0.0368618	0.116992	0.544654	0.000224714	0.000951135
FBgn0004244	0.164209	0.304652	0.635598	0.442666	0.00369413	0.0119097
FBgn0004359	0.597147	3.60962e-05	0.000267221	0.243845	0.124104	0.252047
FBgn0004360	0.435659	0.00434633	0.0182697	0.63442	7.9971e-06	4.59402e-05
FBgn0004362	0.658433	2.71257e-06	2.72038e-05	0.504249	0.000756705	0.0028471
FBgn0004363	0.540269	0.000258303	0.00151466	0.477933	0.00154472	0.0054419
FBgn0004364	0.319629	0.0413905	0.128797	0.24233	0.126535	0.256204
FBgn0004367	0.631186	9.18612e-06	7.98989e-05	0.440153	0.00391749	0.0125455
FBgn0004368	0.439081	0.00401621	0.0170602	0.0101645	0.949712	1
FBgn0004369	0.655448	3.11896e-06	3.08403e-05	0.418345	0.00640355	0.0195304
FBgn0004370	0.254288	0.108295	0.285665	0.687245	6.48278e-07	4.71937e-06
FBgn0004372	0.368775	0.0175036	0.0617033	0.608172	2.35768e-05	0.000122343
FBgn0004373	0.526736	0.000392322	0.00219147	0.280617	0.0752341	0.166208
FBgn0004374	0.484399	0.0013031	0.00632961	0.650615	3.89741e-06	2.39603e-05
FBgn0004378	0.686352	6.79333e-07	8.04658e-06	0.615494	1.76104e-05	9.42827e-05
FBgn0004379	0.673321	1.32044e-06	1.43996e-05	0.769144	3.80572e-09	4.55363e-08
FBgn0004380	0.478334	0.00152865	0.0073056	0.194064	0.223744	0.408799
FBgn0004381	0.671601	1.43796e-06	1.55309e-05	0.594019	4.06159e-05	0.000201173
FBgn0004387	0.495821	0.000956956	0.00481688	0.597167	3.60691e-05	0.000180383
FBgn0004389	0.0804075	0.617176	1	0.116004	0.469969	0.732522
FBgn0004390	0.775177	2.40061e-09	5.16093e-08	0.352855	0.0234578	0.0609098
FBgn0004391	0.00153751	0.992389	1	0.503495	0.000772969	0.00290317
FBgn0004394	0.703555	2.67686e-07	3.59648e-06	0.673347	1.31872e-06	8.98404e-06
FBgn0004395	0.563372	0.000121278	0.000779408	0.389119	0.011793	0.0335535
FBgn0004396	0.623775	1.25468e-05	0.00010552	0.768263	4.06601e-09	4.83115e-08
FBgn0004397	2.02844e-13	1	1	0.142785	0.372928	0.61289
FBgn0004400	0.949778	0	0	0.448975	0.00318179	0.0104246
FBgn0004401	0.548627	0.000197743	0.00119861	0.247065	0.119057	0.243524
FBgn0004403	0.123172	0.442765	0.830234	0.0586506	0.71564	1
FBgn0004404	0	1	1	0	1	1
FBgn0004406	0.455262	0.00273419	0.0121773	0.641581	5.84979e-06	3.45303e-05
FBgn0004414	0.0269657	0.867092	1	0.456261	0.00266841	0.00891046
FBgn0004419	0.600434	3.18436e-05	0.000239408	0.177308	0.267118	0.470466
FBgn0004425	0.853059	1.1956e-12	4.81902e-11	0.753822	1.15541e-08	1.24048e-07
FBgn0004426	0.892184	3.88578e-15	2.58164e-13	0.942343	0	0
FBgn0004427	0.949979	0	0	0.976217	0	0
FBgn0004428	0.941888	0	0	0.913592	1.11022e-16	7.36052e-15
FBgn0004429	0.881408	2.30926e-14	1.33491e-12	0.935436	0	0
FBgn0004430	0.217318	0.171957	0.411949	0.351435	0.0240623	0.0622464
FBgn0004431	0.775923	2.2655e-09	4.90162e-08	0.858665	5.86975e-13	1.79232e-11
FBgn0004432	0.503243	0.000778468	0.00401854	0.361924	0.019888	0.0527945
FBgn0004435	0.202772	0.203227	0.468953	0.261576	0.0982041	0.207599
FBgn0004436	0.43778	0.00413907	0.0175139	0.439478	0.00397943	0.0127259
FBgn0004449	0.576701	7.63819e-05	0.000518156	0.650686	3.88475e-06	2.38911e-05
FBgn0004456	0.549412	0.000192775	0.00117228	0.341062	0.0288836	0.0730927
FBgn0004462	0.526865	0.000390799	0.00218332	0.223449	0.159871	0.311079
FBgn0004463	0.733857	4.3777e-08	7.22854e-07	0.664864	1.99736e-06	1.30566e-05
FBgn0004465	0.447776	0.00327408	0.0142716	0.746488	1.91169e-08	1.95454e-07
FBgn0004507	0.74339	2.35281e-08	4.12467e-07	0.749325	1.57652e-08	1.64191e-07
FBgn0004509	0.82708	2.28809e-11	7.25177e-10	0.566315	0.000109696	0.000494786
FBgn0004510	0.558887	0.000141067	0.000890179	0.24485	0.122513	0.24941
FBgn0004511	0.0934791	0.560915	0.975444	1.12209e-21	1	1
FBgn0004512	0.841278	4.86666e-12	1.74895e-10	0.76731	4.36596e-09	5.13207e-08
FBgn0004513	0.385963	0.0125579	0.0463461	0.522601	0.000444216	0.00175732
FBgn0004514	0.613323	1.92166e-05	0.000153375	0.270873	0.0863952	0.186524
FBgn0004516	0.329652	0.0350824	0.112198	0.388867	0.0118526	0.0337
FBgn0004552	0.270271	0.0871257	0.239792	0.115835	0.470621	0.733471
FBgn0004554	0.396555	0.0101463	0.0384661	0.324814	0.0380212	0.092856
FBgn0004556	0.709834	1.87432e-07	2.61497e-06	0.536262	0.00029287	0.0012046
FBgn0004567	0.161089	0.314067	0.649988	0.0311597	0.846647	1
FBgn0004569	0.536403	0.000291583	0.0016893	0.54139	0.00024931	0.0010437
FBgn0004573	0.240084	0.130204	0.330663	0.351033	0.0242355	0.0626231
FBgn0004574	0.268026	0.0898883	0.246114	0	1	1
FBgn0004575	0.268937	0.0887589	0.243442	0.528512	0.000371757	0.00149833
FBgn0004577	2.71912e-20	1	1	0.274613	0.081969	0.178369
FBgn0004580	0.295807	0.0601238	0.176939	0.311351	0.0472706	0.111973
FBgn0004581	0.323921	0.0385852	0.121448	0.813944	8.50024e-11	1.53099e-09
FBgn0004583	0.308964	0.0490857	0.149221	0.30289	0.0539594	0.125377
FBgn0004584	0.597192	3.60344e-05	0.000266822	0.737322	3.50389e-08	3.38249e-07
FBgn0004587	0.712768	1.58163e-07	2.2492e-06	0.445567	0.00345021	0.0111974
FBgn0004588	0	1	1	3.99022e-17	1	1
FBgn0004589	0	1	1	0.30298	0.053884	0.125236
FBgn0004590	0.143459	0.37065	0.732014	0.0254545	0.87448	1
FBgn0004591	0.063124	0.694955	1	0	1	1
FBgn0004592	0	1	1	0	1	1
FBgn0004594	0	1	1	0.0119136	0.941072	1
FBgn0004595	0.439425	0.00398429	0.0169374	0.690859	5.35543e-07	3.96216e-06
FBgn0004597	0.571024	9.3234e-05	0.000617125	0.228571	0.150256	0.295987
FBgn0004598	0.642992	5.4951e-06	5.05516e-05	0.317296	0.0429843	0.103393
FBgn0004606	0.139243	0.38503	0.752373	0.209801	0.187655	0.354218
FBgn0004607	0.337881	0.030513	0.0996388	0.578128	7.26066e-05	0.000339213
FBgn0004611	0.274034	0.0826423	0.229885	0.0148544	0.926561	1
FBgn0004618	0.179149	0.262097	0.569074	0.306003	0.0514153	0.12037
FBgn0004619	0.278623	0.077421	0.218033	0.0619614	0.700311	0.986998
FBgn0004620	0.576749	7.62531e-05	0.000517386	0.598667	3.40695e-05	0.000171338
FBgn0004622	0.656582	2.95838e-06	2.94246e-05	0.80527	1.91358e-10	3.17165e-09
FBgn0004623	0.498123	0.000898065	0.00454979	0.539342	0.000265949	0.00110602
FBgn0004629	0.839595	5.89195e-12	2.09294e-10	0.783783	1.21344e-09	1.63376e-08
FBgn0004635	0.545847	0.000216289	0.00129662	0.617614	1.61615e-05	8.71833e-05
FBgn0004636	0.677599	1.06548e-06	1.19388e-05	0.377587	0.014795	0.0407871
FBgn0004638	0.32383	0.0386427	0.121606	0.210983	0.185122	0.350486
FBgn0004643	0.556906	0.000150704	0.000944118	0.16967	0.288614	0.499725
FBgn0004644	0.414667	0.00693535	0.0275791	0.479478	0.00148363	0.00524946
FBgn0004646	0.682035	8.49829e-07	9.78171e-06	0.585137	5.64079e-05	0.000270569
FBgn0004647	0	1	1	0.352635	0.0235504	0.0611103
FBgn0004648	0.698622	3.51944e-07	4.54784e-06	0.657201	2.874e-06	1.81736e-05
FBgn0004649	0.295975	0.0599716	0.176568	0.4824	0.00137392	0.00490404
FBgn0004650	0.543477	0.000233321	0.00138863	0.775502	2.34087e-09	2.94353e-08
FBgn0004652	0.617417	1.62912e-05	0.000133069	0.775917	2.26665e-09	2.85864e-08
FBgn0004654	0.167251	0.29565	0.621882	0.41172	0.00738867	0.0221523
FBgn0004655	0	1	1	0	1	1
FBgn0004656	2.06936e-15	1	1	0.262603	0.0968415	0.205215
FBgn0004657	0.390313	0.0115142	0.0429208	0.519699	0.00048424	0.00190196
FBgn0004666	0.531117	0.000343333	0.00194971	0.261385	0.0984582	0.20802
FBgn0004687	0.482637	0.00136535	0.00660072	0.440768	0.00386175	0.0123879
FBgn0004698	0.736597	3.67217e-08	6.18128e-07	0.395309	0.0104077	0.0300078
FBgn0004777	0.0128774	0.936314	1	0.343658	0.027608	0.0702698
FBgn0004778	0.285739	0.069838	0.200196	0.183953	0.249295	0.445453
FBgn0004779	0.202303	0.204296	0.470907	0.0333154	0.836177	1
FBgn0004780	0.0268259	0.867775	1	0.215267	0.176144	0.336479
FBgn0004781	0.0159172	0.921322	1	0	1	1
FBgn0004782	0.243111	0.125277	0.320942	0.0999776	0.533862	0.808768
FBgn0004784	0.511566	0.000614136	0.00325215	0.614571	1.82777e-05	9.74573e-05
FBgn0004795	0.526577	0.000394215	0.00220089	0.284727	0.0708795	0.158167
FBgn0004797	0.40248	0.00897909	0.0346233	0.428481	0.00511614	0.0159246
FBgn0004811	0.580301	6.71833e-05	0.000462905	0.47524	0.0016565	0.0058027
FBgn0004828	0.445758	0.00343462	0.0148756	0.0124188	0.938578	1
FBgn0004832	0.419631	0.00622599	0.025062	0.473777	0.0017202	0.00600299
FBgn0004837	0.514141	0.000569989	0.00304507	0.091874	0.567694	0.846919
FBgn0004838	0.393246	0.0108531	0.0407438	0.217055	0.172491	0.331152
FBgn0004839	0.608581	2.32002e-05	0.00018136	0.614511	1.83215e-05	9.76601e-05
FBgn0004841	0.219265	0.16805	0.404567	0.383433	0.0132011	0.0369977
FBgn0004842	0.0600552	0.709123	1	0.544659	0.000224685	0.000951127
FBgn0004852	0.59833	3.4509e-05	0.00025716	0.542611	0.000239842	0.00100815
FBgn0004854	0.0920244	0.567057	0.982889	0.75655	9.53766e-09	1.04205e-07
FBgn0004855	0.498748	0.000882618	0.00448143	0.0345467	0.830208	1
FBgn0004856	0.519952	0.000480621	0.00261768	0.0339691	0.833007	1
FBgn0004858	0.291632	0.064013	0.186245	0.392766	0.0109591	0.0314037
FBgn0004859	0.535181	0.000302882	0.00174698	0.448535	0.00321533	0.0105223
FBgn0004860	0.446966	0.0033377	0.0145078	0.072987	0.650129	0.935221
FBgn0004861	0.308223	0.0496604	0.150646	0.229601	0.148376	0.292961
FBgn0004862	0.136441	0.394764	0.766302	0.104054	0.517222	0.789118
FBgn0004863	0.201474	0.2062	0.474422	0.207961	0.191647	0.360257
FBgn0004864	0.187656	0.23972	0.531144	7.30654e-22	1	1
FBgn0004865	0.599873	3.25358e-05	0.000244177	0.736622	3.66613e-08	3.52513e-07
FBgn0004867	0.202506	0.203833	0.470127	1.11285e-19	1	1
FBgn0004868	0.470979	0.00184804	0.00862004	0.160031	0.317297	0.538824
FBgn0004870	0.358577	0.0211482	0.0726985	0.360923	0.020258	0.0536181
FBgn0004872	0.79636	4.22666e-10	1.05876e-08	0.31622	0.0437356	0.104924
FBgn0004875	0.204231	0.199922	0.462813	0.127341	0.427349	0.681652
FBgn0004876	0.470151	0.00188745	0.00877961	0.478315	0.00152941	0.00539333
FBgn0004878	0.101355	0.528211	0.935945	0.0212581	0.895048	1
FBgn0004880	0.269093	0.0885662	0.243025	0.325796	0.0374088	0.0915592
FBgn0004882	0.706243	2.30073e-07	3.1474e-06	0.691059	5.2987e-07	3.92359e-06
FBgn0004885	0.516388	0.000533811	0.00287679	0.516157	0.000537425	0.00209158
FBgn0004888	0.446094	0.00340741	0.0147672	0.56657	0.000108741	0.000490932
FBgn0004889	0.44453	0.00353577	0.0152376	0.257559	0.103672	0.217245
FBgn0004892	0.203901	0.200667	0.464092	0.39972	0.00950767	0.0277163
FBgn0004893	0.202575	0.203676	0.469861	0.620174	1.45576e-05	7.93217e-05
FBgn0004895	5.73796e-17	1	1	0.167251	0.29565	0.509321
FBgn0004896	0	1	1	0.0669865	0.677269	0.963886
FBgn0004898	0.32024	0.0409817	0.127778	0.40542	0.00844382	0.0249428
FBgn0004901	0.504721	0.0007467	0.00387525	0.126681	0.429771	0.68468
FBgn0004903	0.722408	8.9202e-08	1.35758e-06	0.560151	0.000135214	0.0005978
FBgn0004907	5.50914e-15	1	1	0.269744	0.0877675	0.189012
FBgn0004908	0.428478	0.00511649	0.0211075	0.645417	4.9312e-06	2.96316e-05
FBgn0004910	0.483074	0.00134969	0.00653248	0.42975	0.00497203	0.01553
FBgn0004911	0.389591	0.0116823	0.0434322	0.525331	0.000409309	0.00163192
FBgn0004913	0.53093	0.000345313	0.00195996	0.604632	2.70792e-05	0.000138889
FBgn0004914	0.682632	8.24105e-07	9.51802e-06	0.553915	0.000166381	0.000723368
FBgn0004915	0.727431	6.55615e-08	1.03121e-06	0.30811	0.0497483	0.11698
FBgn0004919	0.217112	0.172375	0.412687	0.352788	0.0234858	0.0609637
FBgn0004921	0.116947	0.466342	0.860469	0.174484	0.274938	0.481453
FBgn0004924	0.577445	7.4392e-05	0.000506384	0.226079	0.154879	0.303306
FBgn0004926	0.108348	0.499976	0.902562	0.243494	0.124665	0.253051
FBgn0004956	4.16061e-16	1	1	0.170662	0.285761	0.495894
FBgn0004957	0.421931	0.00591921	0.0239638	0.0100731	0.950164	1
FBgn0004959	0.71196	1.65772e-07	2.34459e-06	0.233102	0.142112	0.282738
FBgn0005198	2.88974e-20	1	1	0.141372	0.377731	0.6192
FBgn0005278	0.643645	5.33776e-06	4.92785e-05	0.602384	2.95428e-05	0.000150236
FBgn0005322	0.427005	0.00528837	0.0216956	0.124451	0.438003	0.694722
FBgn0005355	0.226744	0.153637	0.377228	1.28509e-16	1	1
FBgn0005386	0.137273	0.391859	0.762194	0.3128	0.046195	0.109829
FBgn0005390	0.820762	4.35904e-11	1.30759e-09	0.369378	0.0173058	0.0467483
FBgn0005391	0.663024	2.18185e-06	2.2413e-05	0.26261	0.0968318	0.205208
FBgn0005411	0.457436	0.00259277	0.0116278	0	1	1
FBgn0005427	0.799231	3.28829e-10	8.4627e-09	0.277828	0.0783062	0.171825
FBgn0005533	0.0539555	0.737565	1	0.139152	0.385345	0.628718
FBgn0005536	0.349095	0.0250865	0.0842705	0.416337	0.00668928	0.0202842
FBgn0005558	0.639161	6.50758e-06	5.87158e-05	0.430801	0.0048553	0.0152198
FBgn0005561	0.366615	0.0182281	0.0640037	0.435074	0.00440498	0.0139415
FBgn0005564	0.600979	3.11846e-05	0.000234975	0.240264	0.129906	0.261833
FBgn0005585	0.186716	0.242126	0.535233	0.49169	0.00107132	0.00390454
FBgn0005586	0.292256	0.0634198	0.184821	0.297381	0.0587076	0.134755
FBgn0005590	0.0834353	0.603935	1	0.162017	0.311248	0.530797
FBgn0005592	0.359025	0.0209757	0.0722412	0.679605	9.62364e-07	6.74506e-06
FBgn0005593	2.88394e-16	1	1	0	1	1
FBgn0005596	0.589789	4.75497e-05	0.00033974	0.135187	0.399168	0.646258
FBgn0005612	0.724655	7.77889e-08	1.20173e-06	0.799503	3.21056e-10	5.01634e-09
FBgn0005613	0.0229601	0.886697	1	0.138952	0.386036	0.629575
FBgn0005614	0.802179	2.5304e-10	6.64684e-09	0.742002	2.57966e-08	2.55916e-07
FBgn0005616	0.551549	0.00017981	0.00110376	0.256696	0.104878	0.219272
FBgn0005617	0.626218	1.13316e-05	9.62094e-05	0.0889466	0.580152	0.860083
FBgn0005619	0.346642	0.0261993	0.0874526	0.379288	0.0143151	0.0396954
FBgn0005624	0.0786886	0.624747	1	0.494527	0.000991566	0.00363681
FBgn0005626	0	1	1	0.272413	0.0845508	0.183145
FBgn0005630	0.528153	0.000375831	0.00210911	0.0854792	0.595066	0.876303
FBgn0005631	0.463875	0.00221104	0.0101014	0.280678	0.075168	0.166081
FBgn0005632	1.88479e-20	1	1	0.031586	0.844575	1
FBgn0005633	0.452213	0.00294379	0.0130029	0.593697	4.11096e-05	0.000203352
FBgn0005636	0.052063	0.746462	1	0.615622	1.75191e-05	9.38234e-05
FBgn0005638	0.278467	0.0775935	0.218446	0.331823	0.0338254	0.0837635
FBgn0005640	0.493902	0.00100866	0.00504958	0.335097	0.0320005	0.0798712
FBgn0005642	0.485699	0.00125876	0.00614163	0	1	1
FBgn0005648	0.572606	8.82265e-05	0.000588124	0.493652	0.00101556	0.00371642
FBgn0005649	0.713612	1.50573e-07	2.15578e-06	1.00328e-17	1	1
FBgn0005655	0.665257	1.95992e-06	2.03997e-05	0.283654	0.0719967	0.160292
FBgn0005658	0.275133	0.081368	0.226919	0.346204	0.0264021	0.067596
FBgn0005659	0.424473	0.00559541	0.0227866	0.46717	0.00203554	0.00698329
FBgn0005660	0.291916	0.063742	0.185616	0.690648	5.41588e-07	4.0034e-06
FBgn0005664	0.839712	5.81446e-12	2.06759e-10	0.90245	5.55112e-16	3.29556e-14
FBgn0005666	0.479675	0.001476	0.00707497	0.487044	0.00121432	0.00438213
FBgn0005670	0.915155	0	0	0.868288	1.6076e-13	5.53356e-12
FBgn0005671	0.330169	0.0347799	0.111378	0.43809	0.0041095	0.0130951
FBgn0005672	0.677094	1.09304e-06	1.22112e-05	0.452699	0.00290947	0.00963238
FBgn0005674	0	1	1	0.441878	0.00376292	0.0121051
FBgn0005677	0.352277	0.0237021	0.0801934	0.602297	2.96423e-05	0.000150674
FBgn0005683	0.678718	1.0068e-06	1.13717e-05	0.60874	2.30556e-05	0.000119894
FBgn0005694	0.656037	3.03467e-06	3.01308e-05	0.904312	4.44089e-16	2.67845e-14
FBgn0005695	0.667825	1.73054e-06	1.82781e-05	0	1	1
FBgn0005696	0.638636	6.659e-06	5.99062e-05	0.196857	0.217014	0.39884
FBgn0005771	0.421676	0.00595259	0.0240817	0.519064	0.000493408	0.00193352
FBgn0005775	0.0935037	0.560812	0.975414	0.36819	0.0176975	0.0476554
FBgn0005777	0.629018	1.0072e-05	8.67345e-05	0.553563	0.000168321	0.000731151
FBgn0005778	0.128095	0.424596	0.806797	0.793773	5.28201e-10	7.83609e-09
FBgn0005779	0.39187	0.0111591	0.0417488	0.800345	2.97988e-10	4.69466e-09
FBgn0008635	0	1	1	0.030995	0.847449	1
FBgn0008636	1.95731e-24	1	1	0.503253	0.000778256	0.0029211
FBgn0008646	0.0436713	0.78629	1	0.306629	0.0509158	0.119363
FBgn0008651	0.417829	0.00647591	0.0259781	0.570849	9.38037e-05	0.00042924
FBgn0010014	0.0341692	0.832037	1	0.173084	0.278872	0.486791
FBgn0010015	0.636657	7.25915e-06	6.47541e-05	0.729547	5.74687e-08	5.28715e-07
FBgn0010019	0.574847	8.15545e-05	0.000549279	0.73209	4.89738e-08	4.58988e-07
FBgn0010038	0.893241	3.21965e-15	2.1689e-13	0.717956	1.16554e-07	9.99201e-07
FBgn0010039	0.976182	0	0	0.955597	0	0
FBgn0010040	0.32636	0.0370608	0.11747	0.487213	0.00120883	0.00436507
FBgn0010041	0.87431	6.78346e-14	3.51835e-12	0.885435	1.22125e-14	5.30821e-13
FBgn0010042	0.228889	0.149675	0.369054	0.132696	0.407996	0.657334
FBgn0010043	0.688907	5.93949e-07	7.1479e-06	0.744204	2.22858e-08	2.24286e-07
FBgn0010044	0.81915	5.11725e-11	1.51004e-09	0.834783	1.006e-11	2.30851e-10
FBgn0010051	0.36622	0.0183631	0.0643773	0.572907	8.73024e-05	0.000401431
FBgn0010052	0.401555	0.00915331	0.0351907	0.463248	0.00224591	0.00764193
FBgn0010053	0.889525	6.21725e-15	3.95949e-13	0.928492	0	0
FBgn0010078	0	1	1	4.68055e-17	1	1
FBgn0010097	0.669969	1.55832e-06	1.66818e-05	0.0348137	0.828915	1
FBgn0010100	0.708981	1.96833e-07	2.73023e-06	0.74862	1.65435e-08	1.71353e-07
FBgn0010105	2.96747e-18	1	1	0.415171	0.00686036	0.0207528
FBgn0010109	0.617001	1.65683e-05	0.000135043	0.215532	0.175598	0.335607
FBgn0010113	0.626838	1.10408e-05	9.40948e-05	0.0964148	0.548616	0.825408
FBgn0010114	0.365115	0.0187455	0.0655617	0.209789	0.187681	0.354243
FBgn0010173	0.698565	3.53054e-07	4.56044e-06	0.491655	0.00107235	0.00390704
FBgn0010194	0.598654	3.40866e-05	0.000254348	0.436594	0.00425388	0.0135072
FBgn0010197	0.191011	0.231262	0.517132	0.612866	1.95709e-05	0.000103671
FBgn0010198	0.273636	0.0831081	0.230858	0.32954	0.0351481	0.0866172
FBgn0010213	0.592126	4.35967e-05	0.000314801	0.652274	3.61203e-06	2.23836e-05
FBgn0010215	0.55732	0.000148641	0.000933096	0.581768	6.37301e-05	0.000301713
FBgn0010217	0.345386	0.026785	0.0890208	0.480018	0.0014628	0.00518494
FBgn0010220	0.554393	0.000163779	0.00101605	0.321507	0.0401431	0.097301
FBgn0010222	0.640321	6.18426e-06	5.62035e-05	0.837749	7.24942e-12	1.71913e-10
FBgn0010223	0.462278	0.00230077	0.0104534	0.50431	0.000755411	0.00284313
FBgn0010225	0.548881	0.000196122	0.00118964	0.403863	0.00872377	0.0256763
FBgn0010226	0.587021	5.26544e-05	0.000372251	0.809889	1.24851e-10	2.16187e-09
FBgn0010228	0.335219	0.031934	0.103529	0.443615	0.00361274	0.0116726
FBgn0010235	0.512364	0.000600126	0.00318895	0.330311	0.0346972	0.0856421
FBgn0010238	0.880207	2.78666e-14	1.58381e-12	0.699659	3.32417e-07	2.5833e-06
FBgn0010240	0.278017	0.0780951	0.219712	0.284425	0.0711928	0.15872
FBgn0010241	0.978659	0	0	0.964642	0	0
FBgn0010246	0.77028	3.49332e-09	7.26976e-08	0.630875	9.30891e-06	5.27469e-05
FBgn0010247	0.853508	1.13054e-12	4.6062e-11	0.827453	2.20081e-11	4.62658e-10
FBgn0010258	0.0309802	0.847521	1	0.687663	6.34202e-07	4.62183e-06
FBgn0010263	0.696131	4.03272e-07	5.13651e-06	0.721354	9.50747e-08	8.30733e-07
FBgn0010265	0.263908	0.0951313	0.257426	0.23147	0.145007	0.287508
FBgn0010269	0.475798	0.00163279	0.00773118	0.121043	0.450755	0.709913
FBgn0010278	0.51283	0.000592083	0.00315166	0.433425	0.00457432	0.0144199
FBgn0010280	0.262539	0.0969261	0.261259	4.86594e-17	1	1
FBgn0010282	0.43233	0.00468983	0.0195219	0.54555	0.000218359	0.000927115
FBgn0010287	0.64088	6.03384e-06	5.49546e-05	0.627619	1.06843e-05	5.97747e-05
FBgn0010288	0.601646	3.03952e-05	0.000229539	0.676726	1.11347e-06	7.70277e-06
FBgn0010292	0.485161	0.00127693	0.0062159	4.18693e-16	1	1
FBgn0010296	3.07176e-19	1	1	0.332836	0.0332519	0.082523
FBgn0010300	0.655578	3.10018e-06	3.06815e-05	0.360118	0.02056	0.0543371
FBgn0010303	0.133713	0.404378	0.779061	3.84437e-14	1	1
FBgn0010309	0.595725	3.80908e-05	0.000280208	0.612457	1.98938e-05	0.000105186
FBgn0010313	0.211979	0.183005	0.432351	0.389315	0.0117469	0.0334363
FBgn0010314	0.461906	0.00232216	0.0105421	0.581241	6.49512e-05	0.00030694
FBgn0010315	0.690168	5.5559e-07	6.75112e-06	0.113664	0.479038	0.74397
FBgn0010316	0.593641	4.11967e-05	0.00029986	0	1	1
FBgn0010317	0.612152	2.01374e-05	0.00016007	0.383155	0.0132735	0.0371639
FBgn0010323	1.48566e-19	1	1	0.300947	0.0555975	0.128587
FBgn0010328	0.321147	0.0403799	0.126181	0	1	1
FBgn0010329	0.341046	0.0288916	0.0951064	0.158363	0.32244	0.545543
FBgn0010333	0.430477	0.00489099	0.0202744	0.535761	0.000297471	0.00122176
FBgn0010339	0.243934	0.123963	0.318279	0.154386	0.334901	0.562023
FBgn0010340	0.0221161	0.890837	1	0.116335	0.468693	0.731102
FBgn0010341	0.647613	4.46711e-06	4.22557e-05	0.400125	0.00942837	0.0275243
FBgn0010342	0.57067	9.43897e-05	0.000623676	0	1	1
FBgn0010348	0.415157	0.00686233	0.0273241	0.325075	0.0378575	0.0925178
FBgn0010350	0.375126	0.0155132	0.0556378	0.0688837	0.668642	0.955159
FBgn0010352	0.640192	6.21945e-06	5.64323e-05	0.622316	1.33288e-05	7.31765e-05
FBgn0010355	0.0149966	0.92586	1	0.470111	0.00188935	0.00653109
FBgn0010356	0.621305	1.38962e-05	0.00011552	0.0773496	0.630671	0.914644
FBgn0010357	0.877165	4.42979e-14	2.38159e-12	0.873064	8.13793e-14	2.98511e-12
FBgn0010358	0.787255	9.13353e-10	2.1316e-08	0.960461	0	0
FBgn0010379	0.748784	1.63592e-08	2.96632e-07	0.83265	1.2683e-11	2.85091e-10
FBgn0010380	0.0419031	0.794755	1	0.048061	0.765383	1
FBgn0010381	0.644447	5.15018e-06	4.77685e-05	0.720243	1.01654e-07	8.82793e-07
FBgn0010382	0.590524	4.62728e-05	0.000331457	0.557737	0.000146588	0.000643889
FBgn0010383	0.571133	9.28795e-05	0.0006149	0.526354	0.000396873	0.0015894
FBgn0010385	0.880568	2.63123e-14	1.50051e-12	0.723509	8.34284e-08	7.3868e-07
FBgn0010387	0.57731	7.47496e-05	0.000508454	0.452402	0.00293042	0.00969435
FBgn0010388	0.764873	5.23001e-09	1.04963e-07	0.840798	5.14055e-12	1.26389e-10
FBgn0010389	0.428824	0.00507679	0.0209675	0.427368	0.00524551	0.0162901
FBgn0010391	1.07537e-15	1	1	1.05887e-16	1	1
FBgn0010395	0.449684	0.00312826	0.0137138	0.614453	1.83642e-05	9.78265e-05
FBgn0010397	0.442295	0.00372641	0.0159494	0.209497	0.188311	0.35524
FBgn0010398	0.439507	0.00397675	0.0169095	0.0263087	0.870302	1
FBgn0010399	0.196437	0.218016	0.494578	0.104515	0.515357	0.786906
FBgn0010401	0.228708	0.150005	0.369679	0.0853887	0.595457	0.876708
FBgn0010403	0.0953792	0.55294	0.965945	0.0889258	0.580241	0.860177
FBgn0010406	0.155599	0.33107	0.67587	0	1	1
FBgn0010407	0.533592	0.000318157	0.00181988	0.441259	0.00381775	0.0122583
FBgn0010408	0.213518	0.179771	0.42644	0.218424	0.16973	0.326902
FBgn0010409	0.0995015	0.535823	0.94548	0.0852232	0.596173	0.877345
FBgn0010411	0.000202957	0.998995	1	0.0568365	0.724086	1
FBgn0010412	0	1	1	8.58914e-15	1	1
FBgn0010414	0.324448	0.0382514	0.120611	0.392067	0.0111149	0.0318021
FBgn0010415	0.287951	0.0676048	0.195084	0.437126	0.00420203	0.0133616
FBgn0010416	0.428419	0.00512322	0.0211231	0.0693697	0.666439	0.952733
FBgn0010417	0.042653	0.791162	1	0	1	1
FBgn0010421	0.552815	0.000172507	0.00106357	0.383548	0.0131712	0.036926
FBgn0010422	0.641532	5.8625e-06	5.35383e-05	0.611843	2.03865e-05	0.000107474
FBgn0010423	0.565039	0.000114586	0.000740912	0.322285	0.0396358	0.0962153
FBgn0010424	0.606723	2.49574e-05	0.000192558	0.651939	3.66813e-06	2.26899e-05
FBgn0010425	0.956241	0	0	0.966194	0	0
FBgn0010431	0.728969	5.95809e-08	9.44165e-07	0.304528	0.0526086	0.12272
FBgn0010434	0.83388	1.11008e-11	3.70212e-10	0.743881	2.27717e-08	2.28491e-07
FBgn0010435	0.408643	0.00788889	0.0309165	0.279811	0.0761119	0.167807
FBgn0010438	0.213866	0.179045	0.425014	0.408339	0.00793979	0.0236053
FBgn0010441	0.500834	0.000832829	0.00425949	0.123646	0.440999	0.698291
FBgn0010452	0.434383	0.00447524	0.0187438	0.639121	6.51906e-06	3.81373e-05
FBgn0010453	0.483923	0.00131967	0.00640183	0.269088	0.0885731	0.190369
FBgn0010470	0.803435	2.26026e-10	5.98554e-09	0.743251	2.3747e-08	2.37241e-07
FBgn0010473	0.515121	0.000553944	0.00297156	0.0756415	0.638261	0.922824
FBgn0010482	0.703077	2.74952e-07	3.67512e-06	0.744204	2.2285e-08	2.24286e-07
FBgn0010488	0.19762	0.215199	0.489533	0.151005	0.345726	0.576301
FBgn0010497	0.518526	0.000501302	0.00271806	0.400303	0.00939375	0.027442
FBgn0010501	0.585548	5.5568e-05	0.000390512	0.28777	0.0677852	0.152148
FBgn0010504	0.818851	5.27085e-11	1.5513e-09	0.669545	1.59108e-06	1.06333e-05
FBgn0010516	0.607542	2.41683e-05	0.000187583	0.569325	9.88938e-05	0.000450054
FBgn0010520	0.440546	0.00388174	0.0165493	0.0657202	0.683049	0.969642
FBgn0010531	0.354355	0.022833	0.0776024	0.154195	0.335507	0.562846
FBgn0010548	0.253254	0.109788	0.288769	0.371102	0.0167507	0.0454541
FBgn0010549	0.929414	0	0	0.824668	2.93534e-11	5.98968e-10
FBgn0010551	0.357729	0.021478	0.0736648	0.452314	0.00293663	0.0097119
FBgn0010575	4.26755e-21	1	1	0.0869509	0.588716	0.869524
FBgn0010583	0.518983	0.000494584	0.00268551	0.429859	0.00495976	0.0155002
FBgn0010590	0.291785	0.0638672	0.185869	0.0297362	0.853576	1
FBgn0010591	0.384221	0.0129978	0.0476991	0.449168	0.00316712	0.0103815
FBgn0010602	0.444485	0.00353951	0.0152498	0.174997	0.273508	0.479811
FBgn0010607	0.521832	0.000454527	0.00248838	0.25865	0.102165	0.214587
FBgn0010611	0.156682	0.327671	0.670834	0.711188	1.73349e-07	1.43763e-06
FBgn0010612	0.305252	0.0520202	0.15659	0.544257	0.000227586	0.000962694
FBgn0010620	0.301466	0.0551563	0.164656	0.487554	0.00119784	0.00432769
FBgn0010621	0.258517	0.102347	0.273032	0.0623705	0.698424	0.98519
FBgn0010622	0.415477	0.00681511	0.0271776	0.367229	0.0180195	0.0484077
FBgn0010638	0.376765	0.0150317	0.0541465	0.430192	0.00492264	0.0153954
FBgn0010651	0.728439	6.15836e-08	9.72256e-07	0.58121	6.50238e-05	0.00030724
FBgn0010660	0.55602	0.000155203	0.000969074	0.495852	0.000956135	0.00351708
FBgn0010704	0.555653	0.000157099	0.000979281	0.0685505	0.670154	0.956838
FBgn0010741	0.39509	0.0104542	0.0394652	0.143129	0.371766	0.611393
FBgn0010747	0.286755	0.0688049	0.197788	0.353407	0.0232261	0.0604181
FBgn0010750	0.350448	0.0244899	0.0825205	0.260103	0.100183	0.211031
FBgn0010762	0.607484	2.42237e-05	0.000187926	0.288679	0.0668822	0.150458
FBgn0010768	0.615595	1.75387e-05	0.000141688	0.363762	0.0192229	0.0512647
FBgn0010770	0.373672	0.0159512	0.0570032	0.324331	0.0383253	0.09346
FBgn0010772	0.6112	2.09156e-05	0.000165489	0.65104	3.82246e-06	2.35393e-05
FBgn0010774	0.692195	4.98688e-07	6.13018e-06	0.0931286	0.562393	0.841293
FBgn0010786	0.806741	1.67228e-10	4.52775e-09	0.670594	1.51113e-06	1.01428e-05
FBgn0010803	0.362992	0.0194994	0.0677709	0.492528	0.00104718	0.00382473
FBgn0010808	0.22471	0.157465	0.384531	0.61278	1.96387e-05	0.00010395
FBgn0010812	0.605317	2.63667e-05	0.000202003	0.533285	0.000321188	0.00130934
FBgn0010825	0.0616244	0.701866	1	0.115274	0.472788	0.736343
FBgn0010830	0.265862	0.0926146	0.251967	0.258779	0.101988	0.214309
FBgn0010877	0.751077	1.39783e-08	2.59158e-07	0.692565	4.88904e-07	3.6464e-06
FBgn0010894	0.491031	0.00109066	0.0054147	0.399954	0.00946179	0.02761
FBgn0010905	0.294637	0.0611943	0.17948	0.101722	0.526708	0.800813
FBgn0010909	0.506864	0.000702684	0.00366708	0.322158	0.0397182	0.0964085
FBgn0010926	0.772456	2.96026e-09	6.24499e-08	0.204841	0.198552	0.370565
FBgn0011016	0.313496	0.0456854	0.140322	0.465232	0.00213718	0.0073077
FBgn0011020	0.590585	4.61677e-05	0.000330774	0.388864	0.0118534	0.0337
FBgn0011202	0.577866	7.32878e-05	0.000500075	0.612429	1.99162e-05	0.000105287
FBgn0011204	0.152472	0.341004	0.690813	0.618566	1.55469e-05	8.42117e-05
FBgn0011205	0.488587	0.00116505	0.00573902	0.537702	0.00027999	0.00115792
FBgn0011206	0.462884	0.00226637	0.0103204	0.708614	2.0102e-07	1.6443e-06
FBgn0011207	0.6977	3.70195e-07	4.76004e-06	0.585253	5.61687e-05	0.000269548
FBgn0011211	0.604019	2.77312e-05	0.000210881	0.612687	1.97112e-05	0.000104317
FBgn0011217	0.474293	0.00169751	0.00800288	0.271324	0.0858523	0.18554
FBgn0011224	0.579138	7.00379e-05	0.000480615	0.564842	0.000115359	0.000518202
FBgn0011225	0.473535	0.00173094	0.00813666	0.354305	0.0228535	0.0596171
FBgn0011227	0.247035	0.119102	0.307832	0.374117	0.0158161	0.0432313
FBgn0011230	0.454741	0.00276903	0.0123114	0.416626	0.00664758	0.0201736
FBgn0011232	0.30446	0.0526635	0.158248	0.42159	0.00596389	0.018296
FBgn0011236	0.580574	6.65266e-05	0.000459186	0.681039	8.94364e-07	6.30346e-06
FBgn0011239	0	1	1	0.836896	7.97096e-12	1.87328e-10
FBgn0011241	0.32898	0.0354793	0.113221	0.75735	9.01202e-09	9.91934e-08
FBgn0011244	0.107372	0.503872	0.907124	0.809721	1.26835e-10	2.18954e-09
FBgn0011259	0.552204	0.000175997	0.00108311	0.664728	2.01049e-06	1.31198e-05
FBgn0011260	0.807323	1.58502e-10	4.31858e-09	0.825965	2.56849e-11	5.32076e-10
FBgn0011270	0.0763498	0.635109	1	0.80731	1.58698e-10	2.67905e-09
FBgn0011272	0	1	1	0	1	1
FBgn0011274	0.549893	0.000189787	0.00115661	0.378893	0.0144255	0.039959
FBgn0011276	0	1	1	0.0685347	0.670226	0.9569
FBgn0011277	0.259378	0.101168	0.270463	0.00161382	0.992011	1
FBgn0011278	0.16307	0.308069	0.64074	0.120332	0.453438	0.713216
FBgn0011279	0.454881	0.0027596	0.0122743	0.407662	0.00805436	0.0239126
FBgn0011280	0.542589	0.000240004	0.0014224	0.45342	0.0028592	0.00948069
FBgn0011281	0.108359	0.499932	0.902562	0.086424	0.590986	0.871859
FBgn0011282	0.177684	0.266086	0.576071	0.188827	0.236745	0.427614
FBgn0011283	0.521432	0.000459966	0.00251531	0.308949	0.0490977	0.115682
FBgn0011284	0	1	1	6.29595e-19	1	1
FBgn0011286	0.630715	9.3724e-06	8.13518e-05	0.620956	1.40971e-05	7.70096e-05
FBgn0011288	0.0951029	0.554096	0.967442	0.370133	0.0170611	0.0461677
FBgn0011289	0.317453	0.0428752	0.132751	0	1	1
FBgn0011290	1.6549e-21	1	1	0.0465443	0.772589	1
FBgn0011291	0.196437	0.218017	0.494578	0.100722	0.530806	0.805355
FBgn0011293	0.412615	0.00724836	0.0286721	0.00627753	0.968931	1
FBgn0011294	0.307903	0.0499103	0.151265	0.0169347	0.91631	1
FBgn0011296	0.541821	0.000245933	0.0014527	0.650093	3.99147e-06	2.44812e-05
FBgn0011297	0.436069	0.00430556	0.0181412	0.293329	0.062409	0.142065
FBgn0011300	0.109463	0.495545	0.897101	0.489729	0.00112975	0.0041008
FBgn0011305	0.743646	2.313e-08	4.05909e-07	0.0293444	0.855485	1
FBgn0011327	0.557345	0.000148516	0.000932661	0.777112	2.0646e-09	2.63011e-08
FBgn0011335	0.572447	8.87204e-05	0.000590835	0.49678	0.000932007	0.00343686
FBgn0011336	0.299645	0.0567173	0.168512	0.437444	0.00417127	0.0132758
FBgn0011361	0.30489	0.0523131	0.157335	0.498644	0.00088518	0.00328265
FBgn0011455	0.661009	2.4017e-06	2.44045e-05	0.615916	1.73123e-05	9.28913e-05
FBgn0011474	0.448063	0.00325175	0.0141853	0.505343	0.000733672	0.00277084
FBgn0011476	0.272973	0.0838876	0.232737	0.386664	0.0123845	0.0350055
FBgn0011481	0.609071	2.27565e-05	0.000178221	0.364207	0.019065	0.0509073
FBgn0011509	0.549169	0.000194299	0.00117964	0.165364	0.301214	0.516815
FBgn0011554	0.776209	2.21564e-09	4.79682e-08	0.785806	1.02903e-09	1.41911e-08
FBgn0011555	0.831806	1.38877e-11	4.54197e-10	0.6502	3.97197e-06	2.43703e-05
FBgn0011556	0.753432	1.1873e-08	2.23628e-07	0.755801	1.00556e-08	1.09129e-07
FBgn0011559	0.0657248	0.683028	1	0.626965	1.09821e-05	6.13502e-05
FBgn0011566	0.345106	0.0269169	0.0894328	0.0841413	0.600865	0.88242
FBgn0011569	0	1	1	0.790096	7.21096e-10	1.03683e-08
FBgn0011570	0.606179	2.54943e-05	0.000196298	0.311354	0.0472683	0.111973
FBgn0011571	0.461885	0.00232334	0.0105447	0.312673	0.0462889	0.110024
FBgn0011573	0.403901	0.00871676	0.0337696	0.213193	0.180451	0.343168
FBgn0011576	0.869905	1.28009e-13	6.32876e-12	0.860238	4.78062e-13	1.4864e-11
FBgn0011581	0.157759	0.324311	0.665897	0.376064	0.0152361	0.0418542
FBgn0011582	0.523398	0.000433766	0.00239488	0.665511	1.93603e-06	1.26995e-05
FBgn0011584	0.198774	0.212477	0.484807	0.36619	0.0183736	0.0492311
FBgn0011586	0.87653	4.87388e-14	2.59559e-12	0.554469	0.000163369	0.000711361
FBgn0011589	0.697846	3.67241e-07	4.72564e-06	0.480436	0.00144684	0.0051369
FBgn0011591	0.376386	0.0151419	0.0544969	0.493587	0.00101738	0.00372226
FBgn0011592	0.469286	0.00192942	0.00895394	0.540704	0.000254775	0.0010641
FBgn0011596	0.481284	0.00141496	0.00680941	0.723561	8.31632e-08	7.36857e-07
FBgn0011603	0.555845	0.000156107	0.000973637	0.585044	5.65996e-05	0.000271348
FBgn0011604	0.789451	7.61073e-10	1.80612e-08	0.792773	5.75199e-10	8.45237e-09
FBgn0011606	0.40978	0.00770077	0.0302677	0.780582	1.56953e-09	2.04922e-08
FBgn0011638	0.689141	5.8666e-07	7.07527e-06	0.184287	0.248423	0.444221
FBgn0011640	2.09309e-16	1	1	0	1	1
FBgn0011642	0.472445	0.00178003	0.00834191	1.54823e-17	1	1
FBgn0011648	0.784619	1.13377e-09	2.61355e-08	0.357528	0.0215569	0.0566336
FBgn0011655	0.23203	0.144008	0.357819	0.0797537	0.620051	0.903472
FBgn0011656	0.222291	0.162105	0.393392	0.379611	0.0142257	0.0394892
FBgn0011659	0.513439	0.000581731	0.00310241	0.70081	3.11941e-07	2.43696e-06
FBgn0011660	0.689983	5.61056e-07	6.80044e-06	0.724669	7.77197e-08	6.93273e-07
FBgn0011661	0.808269	1.45217e-10	3.98603e-09	0.393941	0.0107014	0.0307713
FBgn0011666	0.553495	0.000168697	0.00104293	0.645813	4.84449e-06	2.91516e-05
FBgn0011668	0.0715502	0.656589	1	0.667817	1.7312e-06	1.14596e-05
FBgn0011669	0.0167929	0.917008	1	0.358395	0.0212187	0.0558787
FBgn0011670	0.314908	0.0446663	0.137504	0.582532	6.19988e-05	0.000294375
FBgn0011672	0.608716	2.30768e-05	0.000180562	0.652567	3.56363e-06	2.21003e-05
FBgn0011674	0.720783	9.84085e-08	1.48566e-06	0.662334	2.25492e-06	1.4545e-05
FBgn0011676	0.647962	4.3971e-06	4.1675e-05	0.222617	0.161475	0.313649
FBgn0011692	0.686596	6.70711e-07	7.96743e-06	0.575712	7.91024e-05	0.000366994
FBgn0011693	0.607999	2.37378e-05	0.000184878	0.626709	1.11007e-05	6.19415e-05
FBgn0011694	0	1	1	0.354238	0.0228812	0.0596756
FBgn0011695	0.438376	0.0040824	0.0173	0.438056	0.00411277	0.0131043
FBgn0011701	0.471215	0.00183696	0.00857545	0.245611	0.121317	0.247331
FBgn0011703	0.684937	7.31381e-07	8.6118e-06	0.378554	0.0145206	0.04019
FBgn0011704	0.769159	3.80145e-09	7.85781e-08	0.487264	0.0012072	0.00436058
FBgn0011705	0.457505	0.00258841	0.0116121	0.524444	0.000420373	0.00167192
FBgn0011706	0.160708	0.315229	0.651834	0.50791	0.000682057	0.00259055
FBgn0011708	0.642863	5.5268e-06	5.08156e-05	0.427892	0.00518422	0.01611
FBgn0011710	0.628057	1.04893e-05	8.98014e-05	0.216553	0.17351	0.332717
FBgn0011715	0.450823	0.00304395	0.0133841	0	1	1
FBgn0011722	0.77042	3.45645e-09	7.20634e-08	0.838007	7.04314e-12	1.67487e-10
FBgn0011723	0.428816	0.00507776	0.0209689	0.258759	0.102016	0.214354
FBgn0011725	0.542665	0.00023943	0.00141975	0.432721	0.00464825	0.0146299
FBgn0011726	0.426281	0.00537468	0.0220123	0.220968	0.164685	0.318772
FBgn0011737	0.54895	0.000195687	0.00118764	0.726081	7.1266e-08	6.40605e-07
FBgn0011739	0.398199	0.00981018	0.0373593	0.460688	0.00239328	0.00809086
FBgn0011740	0.896849	1.66533e-15	1.18312e-13	0.502549	0.000793793	0.00297614
FBgn0011741	0.322093	0.0397601	0.12452	0.0985641	0.539693	0.815568
FBgn0011742	0.66281	2.20427e-06	2.26364e-05	0.319629	0.0413908	0.099983
FBgn0011743	0.161497	0.312823	0.647929	0.781278	1.48464e-09	1.9481e-08
FBgn0011745	0.412688	0.00723706	0.0286315	0.0658832	0.682304	0.969069
FBgn0011746	0.385867	0.0125818	0.0464141	0.733229	4.55612e-08	4.29247e-07
FBgn0011747	0.529071	0.000365483	0.00205855	0.115053	0.473643	0.737364
FBgn0011754	0.622084	1.34573e-05	0.000112283	0.288345	0.0672126	0.151102
FBgn0011758	0	1	1	1.38354e-20	1	1
FBgn0011760	0.545409	0.000219353	0.00131359	0.151166	0.345207	0.575636
FBgn0011761	0.60483	2.68714e-05	0.000205264	0.19351	0.225096	0.410741
FBgn0011762	0.688574	6.04493e-07	7.25671e-06	0.435641	0.00434809	0.0137807
FBgn0011763	0.738766	3.19023e-08	5.4377e-07	0.177285	0.26718	0.470551
FBgn0011764	0.523828	0.000428213	0.00236615	0.178174	0.26475	0.467067
FBgn0011766	0.29476	0.061081	0.179226	0.479287	0.00149107	0.00527252
FBgn0011768	0.89448	2.66454e-15	1.82402e-13	0.320249	0.0409754	0.0990367
FBgn0011769	0.0530367	0.741881	1	0.188605	0.237307	0.428382
FBgn0011770	0.547682	0.000203885	0.00123165	0.564361	0.000117268	0.000525905
FBgn0011771	0.52376	0.000429081	0.00237057	0.0411256	0.798484	1
FBgn0011774	0.595688	3.81443e-05	0.000280358	0.395644	0.0103368	0.0298451
FBgn0011785	0	1	1	0.115808	0.470725	0.7336
FBgn0011787	0	1	1	0	1	1
FBgn0011802	0.605427	2.62534e-05	0.000201413	0.92973	0	0
FBgn0011812	0.155083	0.332697	0.678414	1.81485e-15	1	1
FBgn0011817	0.438788	0.00404364	0.0171423	0.525571	0.000406365	0.00162246
FBgn0011818	0.720252	1.01603e-07	1.5298e-06	0.510188	0.000638982	0.00244329
FBgn0011822	0.83796	7.08011e-12	2.46325e-10	0.859827	5.04485e-13	1.56285e-11
FBgn0011823	0.667885	1.72546e-06	1.824e-05	0.758884	8.07821e-09	8.97265e-08
FBgn0011824	0.444907	0.00350441	0.0151236	0.193698	0.224635	0.410052
FBgn0011826	0.439967	0.00393441	0.0167485	0.235622	0.137724	0.27536
FBgn0011828	0.733479	4.48421e-08	7.37529e-07	0.684299	7.56032e-07	5.41473e-06
FBgn0011829	0.370851	0.0168305	0.0597164	0.417102	0.00657912	0.0200086
FBgn0011832	0.674872	1.2221e-06	1.34662e-05	0.0376367	0.815272	1
FBgn0011834	0.808506	1.42056e-10	3.91199e-09	0.970558	0	0
FBgn0011836	0.631325	9.13205e-06	7.9531e-05	0.252719	0.110567	0.228805
FBgn0011837	0.443846	0.00359315	0.0154474	0.452469	0.00292568	0.00968227
FBgn0011840	0	1	1	0	1	1
FBgn0011844	0.118629	0.459906	0.852668	0	1	1
FBgn0011845	0.0565907	0.725233	1	0.206059	0.195837	0.366614
FBgn0011848	6.4168e-17	1	1	3.59011e-14	1	1
FBgn0011849	0.636584	7.28223e-06	6.49086e-05	0.621714	1.36638e-05	7.48228e-05
FBgn0011850	0.294422	0.0613929	0.179907	0.102645	0.522945	0.796122
FBgn0011855	0.361121	0.0201844	0.0698717	1.39818e-16	1	1
FBgn0011858	1.44379e-07	1	1	1.67369e-07	1	1
FBgn0011859	0	1	1	0	1	1
FBgn0011860	0	1	1	3.88008e-15	1	1
FBgn0011861	2.90954e-20	1	1	0.292658	0.0630395	0.143309
FBgn0011863	0.234063	0.140426	0.350801	6.52845e-17	1	1
FBgn0011864	9.85717e-15	1	1	5.83363e-17	1	1
FBgn0011865	0.131251	0.413169	0.790772	0.161604	0.3125	0.532427
FBgn0011866	0	1	1	0.144573	0.366906	0.605475
FBgn0011867	1.42704e-21	1	1	1.27013e-16	1	1
FBgn0011869	0	1	1	0	1	1
FBgn0011870	4.02982e-16	1	1	0	1	1
FBgn0011871	0	1	1	0.213692	0.179407	0.34166
FBgn0011872	8.376e-18	1	1	1.56716e-15	1	1
FBgn0011877	0.238961	0.132066	0.334237	0.108215	0.500506	0.769559
FBgn0011878	0	1	1	0.244557	0.122975	0.250225
FBgn0011879	0.262314	0.0972234	0.261935	3.79553e-14	1	1
FBgn0011880	0.0690105	0.668067	1	0.116964	0.466274	0.728363
FBgn0011881	2.02105e-15	1	1	0	1	1
FBgn0011882	0.34663	0.0262049	0.0874538	0.271448	0.0857037	0.185254
FBgn0011883	0	1	1	0.0962806	0.549175	0.82609
FBgn0011884	0.0923946	0.565491	0.98103	0.105678	0.510667	0.781094
FBgn0011885	1.46067e-15	1	1	0.397028	0.0100486	0.029108
FBgn0011887	0.128245	0.424048	0.806163	0.376484	0.0151134	0.0415472
FBgn0011888	1.28093e-19	1	1	0	1	1
FBgn0011889	0.0244512	0.879391	1	0	1	1
FBgn0011890	0	1	1	0.285723	0.0698547	0.156186
FBgn0011891	0.111536	0.487364	0.886849	0	1	1
FBgn0011892	6.57432e-16	1	1	0.0643745	0.689211	0.975545
FBgn0011893	0.0709317	0.659377	1	0	1	1
FBgn0011894	0.52107	0.000464949	0.00253886	0.156225	0.329102	0.5543
FBgn0011895	0.300025	0.0563888	0.167738	0.077135	0.631623	0.91587
FBgn0011897	8.54973e-18	1	1	0	1	1
FBgn0011906	1.01927e-16	1	1	0.0742525	0.644461	0.929067
FBgn0011909	0.0341734	0.832017	1	2.63472e-15	1	1
FBgn0011910	0	1	1	4.69287e-16	1	1
FBgn0011915	0.0506685	0.753039	1	5.2021e-18	1	1
FBgn0011916	8.34284e-15	1	1	3.78977e-16	1	1
FBgn0011921	0	1	1	8.15937e-20	1	1
FBgn0011927	0.385535	0.0126648	0.0466339	0	1	1
FBgn0011928	1.23145e-21	1	1	7.81974e-16	1	1
FBgn0011931	0	1	1	3.48813e-14	1	1
FBgn0011932	0.038934	0.80902	1	0.165722	0.300153	0.515541
FBgn0011933	0.362744	0.0195889	0.0680535	0.257398	0.103897	0.217649
FBgn0011934	0.0811775	0.613797	1	5.26255e-15	1	1
FBgn0011935	0.10061	0.531264	0.939828	1.23482e-20	1	1
FBgn0011938	1.5786e-16	1	1	1.19118e-14	1	1
FBgn0011944	0	1	1	0	1	1
FBgn0011945	0.526572	0.00039427	0.00220089	0	1	1
FBgn0011948	0	1	1	0	1	1
FBgn0011949	0	1	1	0	1	1
FBgn0011950	0	1	1	1.7783e-07	1	1
FBgn0011951	8.46578e-15	1	1	1.3792e-16	1	1
FBgn0011952	0	1	1	0	1	1
FBgn0011954	0.147029	0.35873	0.716468	0.122453	0.445457	0.703747
FBgn0011955	3.5542e-18	1	1	0	1	1
FBgn0011956	0.181233	0.256491	0.559887	8.81674e-20	1	1
FBgn0011957	0.19416	0.22351	0.503862	0	1	1
FBgn0011958	0.368504	0.0175933	0.0619873	9.26866e-15	1	1
FBgn0011959	0	1	1	0.302064	0.0546508	0.126741
FBgn0011960	0.0152425	0.924648	1	0	1	1
FBgn0011961	0.167708	0.294314	0.619891	0.270803	0.0864805	0.186672
FBgn0011962	0.31188	0.0468753	0.143468	0	1	1
FBgn0011963	4.18316e-19	1	1	4.17471e-14	1	1
FBgn0011965	0	1	1	6.98525e-17	1	1
FBgn0011966	0.356991	0.0217685	0.0744708	0	1	1
FBgn0011970	0	1	1	8.25231e-16	1	1
FBgn0011971	0	1	1	0.217355	0.171882	0.3303
FBgn0011974	0.070163	0.662849	1	0	1	1
FBgn0011975	0.079762	0.620014	1	0.102799	0.522319	0.795305
FBgn0011976	0	1	1	0.0523449	0.745135	1
FBgn0011977	7.54719e-15	1	1	0.0778671	0.628379	0.912445
FBgn0011980	0	1	1	0	1	1
FBgn0011981	0	1	1	0.0890811	0.579577	0.859417
FBgn0011982	0	1	1	0.163342	0.30725	0.525187
FBgn0011983	0.0563306	0.726447	1	0.0674746	0.675045	0.961364
FBgn0011984	4.15015e-14	1	1	0	1	1
FBgn0011985	0.137477	0.391148	0.761074	3.89015e-19	1	1
FBgn0011987	0.258505	0.102365	0.273045	0.20697	0.193822	0.363484
FBgn0011993	0.29876	0.0574889	0.170371	0.192431	0.227744	0.414641
FBgn0011994	0.385455	0.0126849	0.0466925	0.173193	0.278565	0.486397
FBgn0011998	0.263794	0.0952795	0.257745	2.37289e-18	1	1
FBgn0011999	0	1	1	0	1	1
FBgn0012000	0.236806	0.135698	0.341195	0	1	1
FBgn0012001	0	1	1	3.97378e-15	1	1
FBgn0012002	0.0754008	0.639334	1	1.33225e-15	1	1
FBgn0012004	0	1	1	0	1	1
FBgn0012009	7.70429e-18	1	1	9.46411e-18	1	1
FBgn0012010	0.377317	0.0148722	0.0536235	1.16991e-07	1	1
FBgn0012011	4.30137e-15	1	1	0	1	1
FBgn0012016	0	1	1	0.0837513	0.60256	0.884195
FBgn0012017	0	1	1	0.21847	0.169637	0.326779
FBgn0012018	0	1	1	1.41926e-16	1	1
FBgn0012024	0.331179	0.0341946	0.109795	0.125694	0.433406	0.689021
FBgn0012025	0.0389837	0.80878	1	0	1	1
FBgn0012026	0.361772	0.0199438	0.0691449	0.139589	0.383838	0.626847
FBgn0012027	0.204375	0.199599	0.4623	0.352072	0.0237895	0.0616571
FBgn0012028	0.053078	0.741687	1	2.01787e-19	1	1
FBgn0012034	0.559392	0.000138702	0.000877546	0.780952	1.52389e-09	1.99346e-08
FBgn0012036	0.544036	0.000229201	0.00136628	0.716496	1.27094e-07	1.08112e-06
FBgn0012037	0.407996	0.00799769	0.0313066	0.54199	0.000244617	0.00102595
FBgn0012042	0.829876	1.70602e-11	5.51555e-10	0.708163	2.06267e-07	1.68197e-06
FBgn0012051	0.450532	0.00306531	0.0134728	0.192722	0.227027	0.413579
FBgn0012058	0.424291	0.00561807	0.0228651	0.569509	9.82685e-05	0.000447567
FBgn0012344	0.770704	3.3829e-09	7.08356e-08	0.857021	7.25309e-13	2.16217e-11
FBgn0013263	0.280374	0.0754982	0.213604	0	1	1
FBgn0013269	0.529329	0.000362617	0.00204411	0.0292608	0.855893	1
FBgn0013272	0.29324	0.0624926	0.182576	0.40947	0.00775165	0.0230964
FBgn0013276	0.493768	0.00101236	0.00506585	0.311631	0.0470611	0.111577
FBgn0013277	0.854192	1.03795e-12	4.25974e-11	0.895004	2.44249e-15	1.25162e-13
FBgn0013278	0.598514	3.42681e-05	0.000255421	0.646175	4.76616e-06	2.87208e-05
FBgn0013279	0.612194	2.01032e-05	0.000159922	0.407174	0.0081378	0.0241308
FBgn0013300	0.145108	0.365114	0.725019	0.843794	3.64098e-12	9.24542e-11
FBgn0013301	0	1	1	0.884347	1.45439e-14	6.2263e-13
FBgn0013303	0.266544	0.0917484	0.250221	0	1	1
FBgn0013305	0.522275	0.000448565	0.00246292	0.28813	0.0674267	0.151513
FBgn0013307	0.732407	4.80012e-08	7.80412e-07	0.788864	7.9928e-10	1.12876e-08
FBgn0013308	0.744688	2.15763e-08	3.81414e-07	0.57241	8.8834e-05	0.000407758
FBgn0013323	0.755669	1.01501e-08	1.94584e-07	0.590022	4.71418e-05	0.00023015
FBgn0013325	2.38588e-15	1	1	7.60218e-22	1	1
FBgn0013334	0.218	0.170582	0.409381	0.538644	0.000271852	0.00112754
FBgn0013342	0.43903	0.00402105	0.0170743	0.610033	2.19071e-05	0.000114551
FBgn0013343	0.184145	0.248794	0.546684	0.255715	0.10626	0.221578
FBgn0013347	0.0673539	0.675595	1	0	1	1
FBgn0013348	0.169744	0.288403	0.61143	0.441139	0.00382843	0.0122903
FBgn0013432	0.147411	0.357467	0.714448	2.63726e-16	1	1
FBgn0013433	2.17466e-15	1	1	0.271379	0.0857862	0.18542
FBgn0013435	0.52182	0.000454689	0.00248886	0.0646519	0.687939	0.974149
FBgn0013467	0.321634	0.0400601	0.12532	0.432601	0.00466092	0.0146631
FBgn0013469	0.644888	5.04957e-06	4.69899e-05	0.813582	8.80072e-11	1.57594e-09
FBgn0013531	0.709952	1.86166e-07	2.60255e-06	0.0572167	0.722313	1
FBgn0013548	0.3904	0.0114941	0.0428598	0	1	1
FBgn0013563	0.532321	0.000330868	0.00188621	0.0810774	0.614236	0.8968
FBgn0013576	0.363846	0.0191931	0.0668646	0.334053	0.0325733	0.0811167
FBgn0013717	0.682926	8.11681e-07	9.40344e-06	0	1	1
FBgn0013718	0.56036	0.000134268	0.000853007	0.374197	0.0157916	0.0431818
FBgn0013720	0	1	1	1.7745e-19	1	1
FBgn0013725	0.303596	0.0533737	0.160012	0.879231	3.24185e-14	1.29511e-12
FBgn0013726	0.61125	2.08739e-05	0.000165303	0.34438	0.0272613	0.0694671
FBgn0013732	0.34355	0.0276601	0.0916054	0	1	1
FBgn0013733	0.502589	0.000792899	0.00408306	0.381989	0.0135806	0.0379581
FBgn0013746	0.508764	0.000665609	0.00349246	0.279234	0.0767455	0.168944
FBgn0013749	0.140086	0.38213	0.74861	0	1	1
FBgn0013750	0.406164	0.0083129	0.0323607	0.0768453	0.632908	0.917185
FBgn0013751	0.161943	0.31147	0.645997	0.66705	1.79703e-06	1.18585e-05
FBgn0013753	0.644538	5.12917e-06	4.76053e-05	0	1	1
FBgn0013755	0.11062	0.490969	0.891525	0.0691993	0.667211	0.953515
FBgn0013756	0.415422	0.00682314	0.0272065	0.242189	0.126762	0.256612
FBgn0013759	0.144992	0.365505	0.725624	0.183484	0.250527	0.447092
FBgn0013762	0.462523	0.00228683	0.0103985	1.62847e-15	1	1
FBgn0013763	0.407963	0.00800331	0.0313214	0.569129	9.95681e-05	0.00045282
FBgn0013764	0.324039	0.0385099	0.121245	7.49255e-17	1	1
FBgn0013765	0.896039	1.9984e-15	1.39628e-13	0.723219	8.49148e-08	7.5101e-07
FBgn0013767	0.256493	0.105163	0.279188	0.169231	0.289883	0.501387
FBgn0013770	0.413409	0.00712582	0.0282522	0.207629	0.192372	0.361342
FBgn0013771	0.892839	3.55271e-15	2.37905e-13	0.975401	0	0
FBgn0013772	0.957039	0	0	0.97964	0	0
FBgn0013773	0.859274	5.42344e-13	2.36042e-11	0.792178	6.05007e-10	8.87064e-09
FBgn0013799	0.812816	9.46843e-11	2.6975e-09	0.295489	0.0604139	0.138086
FBgn0013809	0.247274	0.118734	0.307032	0.804835	1.99088e-10	3.28062e-09
FBgn0013810	0.759249	7.87015e-09	1.54019e-07	0.847337	2.39908e-12	6.35719e-11
FBgn0013811	0.189114	0.236019	0.524751	0.798673	3.45396e-10	5.34578e-09
FBgn0013812	0.337669	0.0306242	0.0999341	0.615077	1.7909e-05	9.5791e-05
FBgn0013813	0.810379	1.19247e-10	3.32995e-09	0.822112	3.80621e-11	7.52345e-10
FBgn0013949	0.488201	0.0011772	0.00578964	0.349436	0.0249352	0.0642169
FBgn0013953	0.683292	7.96503e-07	9.25613e-06	0.356789	0.0218485	0.0573068
FBgn0013954	0.153164	0.338788	0.687518	0.207709	0.192198	0.361054
FBgn0013972	0.420342	0.00612979	0.0247128	0.132302	0.409403	0.659103
FBgn0013973	0.391587	0.011223	0.0419601	0.378048	0.0146635	0.0405033
FBgn0013981	0.130227	0.416859	0.796437	0.264381	0.0945178	0.201217
FBgn0013983	0.643235	5.43594e-06	5.00619e-05	0.688638	6.02447e-07	4.40928e-06
FBgn0013984	0.345703	0.0266358	0.0886471	0.300439	0.0560326	0.129362
FBgn0013987	0.697721	3.69769e-07	4.75636e-06	0.148805	0.352885	0.586312
FBgn0013995	0.72435	7.92529e-08	1.221e-06	0.404907	0.00853521	0.0251887
FBgn0013997	0.692529	4.89846e-07	6.03905e-06	0	1	1
FBgn0014000	0.928422	0	0	0.875606	5.59552e-14	2.12337e-12
FBgn0014001	0.384332	0.0129694	0.0476155	0.195297	0.220756	0.404468
FBgn0014002	0.319385	0.0415549	0.129231	0.475744	0.00163505	0.00573108
FBgn0014006	0.700645	3.14795e-07	4.12613e-06	0.748821	1.63179e-08	1.69273e-07
FBgn0014007	0.645023	5.01915e-06	4.67326e-05	0.583599	5.96502e-05	0.000284453
FBgn0014009	1.33631e-18	1	1	6.43062e-18	1	1
FBgn0014010	0.468891	0.00194886	0.00903049	0.225888	0.155239	0.303818
FBgn0014011	0.774116	2.606e-09	5.57062e-08	0.626991	1.09702e-05	6.12956e-05
FBgn0014018	0.71283	1.57602e-07	2.24547e-06	0.710304	1.82431e-07	1.50671e-06
FBgn0014019	0.787629	8.85601e-10	2.07255e-08	0.896203	1.88738e-15	1.00181e-13
FBgn0014020	0.314607	0.0448821	0.138105	0.330527	0.0345711	0.0853867
FBgn0014022	0.557157	0.00014945	0.000937387	0.00554305	0.972565	1
FBgn0014023	0	1	1	9.55712e-15	1	1
FBgn0014024	0.373866	0.0158921	0.0568219	0.114786	0.47468	0.738683
FBgn0014026	0.165799	0.299926	0.628337	0.167328	0.295426	0.509011
FBgn0014028	0.325973	0.0372994	0.118115	0.436654	0.00424798	0.0134897
FBgn0014029	0.318903	0.0418811	0.13009	7.793e-16	1	1
FBgn0014031	0.515328	0.000550615	0.00295511	0.570551	9.47794e-05	0.000433414
FBgn0014032	0.836771	8.08242e-12	2.77486e-10	0.0125889	0.937738	1
FBgn0014033	0.716582	1.26451e-07	1.85117e-06	0.729371	5.8103e-08	5.33974e-07
FBgn0014037	0.372805	0.0162171	0.057813	0.268792	0.0889379	0.191021
FBgn0014073	0.139176	0.385263	0.752741	0.508463	0.000671375	0.00255482
FBgn0014075	0.64778	4.43343e-06	4.19606e-05	0.481771	0.00139692	0.00497523
FBgn0014076	0.543482	0.000233287	0.00138863	3.85197e-18	1	1
FBgn0014092	0.349154	0.0250605	0.0841996	0.406888	0.00818699	0.0242577
FBgn0014127	0.689548	5.74152e-07	6.94424e-06	0.555639	0.000157173	0.000686139
FBgn0014133	0.392178	0.01109	0.0415225	0.31436	0.04506	0.107582
FBgn0014135	0.826257	2.49214e-11	7.86897e-10	0.847629	2.31692e-12	6.1613e-11
FBgn0014141	0.320907	0.0405384	0.126617	0.317876	0.0425835	0.102524
FBgn0014143	0.288595	0.0669652	0.193503	0.173515	0.277656	0.485165
FBgn0014163	0.317109	0.0431137	0.133356	0.444685	0.00352286	0.0114071
FBgn0014179	0.214636	0.177445	0.422195	0.328631	0.0356868	0.0877924
FBgn0014184	4.22399e-18	1	1	0.369623	0.0172261	0.0465588
FBgn0014189	0.726482	6.95251e-08	1.08748e-06	0.505946	0.000721254	0.00272758
FBgn0014269	0.500669	0.000836685	0.00427598	0	1	1
FBgn0014340	0.384885	0.0128287	0.0471501	2.00195e-15	1	1
FBgn0014342	0.878121	3.84137e-14	2.12261e-12	0.868353	1.59317e-13	5.50055e-12
FBgn0014343	0.118874	0.458973	0.851317	0	1	1
FBgn0014366	0.442662	0.00369444	0.0158326	0.276185	0.0801618	0.175163
FBgn0014368	0.232587	0.143021	0.355998	2.93447e-15	1	1
FBgn0014380	0.653021	3.49001e-06	3.40415e-05	0.703542	2.67885e-07	2.13238e-06
FBgn0014388	0.44037	0.00389771	0.0166027	0.543139	0.000235846	0.000993686
FBgn0014391	0.381801	0.0136307	0.0497088	0.708459	2.02808e-07	1.65734e-06
FBgn0014395	0.747739	1.75654e-08	3.17143e-07	0.562832	0.000123518	0.00055115
FBgn0014396	0.335663	0.0316931	0.102896	0.375164	0.0155018	0.0424778
FBgn0014411	0.29187	0.063786	0.185729	0	1	1
FBgn0014417	0.981135	0	0	0.848231	2.15583e-12	5.78915e-11
FBgn0014427	0.686567	6.71723e-07	7.96894e-06	0.680183	9.34402e-07	6.56258e-06
FBgn0014454	0.249613	0.115172	0.299945	0.567801	0.000104235	0.000472279
FBgn0014455	0.00810039	0.959915	1	0.115383	0.47237	0.735826
FBgn0014464	0.573634	8.51069e-05	0.000570139	1.41408e-20	1	1
FBgn0014465	0.478928	0.00150512	0.00720334	0.620363	1.44448e-05	7.88082e-05
FBgn0014466	0.533764	0.000316474	0.00181147	1.36197e-15	1	1
FBgn0014469	0.935182	0	0	0.894824	2.44249e-15	1.25162e-13
FBgn0014849	0.105053	0.513182	0.918459	0	1	1
FBgn0014850	1.21872e-15	1	1	0	1	1
FBgn0014851	0.107347	0.503972	0.907208	2.27005e-19	1	1
FBgn0014857	0.379772	0.0141812	0.0514059	0.17828	0.264459	0.466675
FBgn0014859	0.389256	0.0117608	0.0437	0.544694	0.000224427	0.000950263
FBgn0014861	0.509951	0.000643348	0.0033888	0.299421	0.0569125	0.131121
FBgn0014863	0.739765	2.98874e-08	5.12266e-07	0.868472	1.56652e-13	5.41404e-12
FBgn0014865	0.750865	1.41846e-08	2.62552e-07	0.825708	2.63748e-11	5.45042e-10
FBgn0014868	0	1	1	0.162856	0.308712	0.52737
FBgn0014869	0.562183	0.000126263	0.00080807	0.73691	3.59856e-08	3.46532e-07
FBgn0014870	0.198217	0.213789	0.486922	0.206545	0.194758	0.364982
FBgn0014877	0.76182	6.53814e-09	1.28846e-07	0.707365	2.15865e-07	1.75395e-06
FBgn0014879	0.724711	7.75227e-08	1.19816e-06	0.35201	0.0238158	0.0617116
FBgn0014903	0.791262	6.53726e-10	1.57234e-08	0.892631	3.66374e-15	1.80157e-13
FBgn0014906	0.646849	4.62372e-06	4.35666e-05	0.494279	0.0009983	0.00365807
FBgn0014930	0.14302	0.372133	0.734214	0.608069	2.36723e-05	0.000122764
FBgn0014931	0.570326	9.55238e-05	0.000629939	0.724896	7.66477e-08	6.84108e-07
FBgn0014949	0.0349916	0.828054	1	9.84327e-17	1	1
FBgn0015000	0.63584	7.52123e-06	6.68802e-05	0.423413	0.0057286	0.017636
FBgn0015001	0.713253	1.53761e-07	2.19491e-06	0.755538	1.02439e-08	1.10961e-07
FBgn0015008	3.16787e-16	1	1	0.731102	5.21244e-08	4.85411e-07
FBgn0015010	0.605417	2.6264e-05	0.000201445	0.753784	1.15844e-08	1.24335e-07
FBgn0015011	0.382138	0.013541	0.0494083	0.606237	2.54367e-05	0.000131116
FBgn0015019	0.0385642	0.810801	1	0	1	1
FBgn0015024	0.0374541	0.816153	1	1.01518e-17	1	1
FBgn0015025	0.694931	4.30398e-07	5.4157e-06	0.491346	0.00108139	0.00393786
FBgn0015031	0.392254	0.011073	0.0414648	0.499137	0.00087314	0.00324294
FBgn0015032	0.487957	0.00118495	0.00582094	0.664305	2.05186e-06	1.3359e-05
FBgn0015033	0.860092	4.87388e-13	2.14609e-11	0.894986	2.44249e-15	1.25162e-13
FBgn0015034	0.759112	7.94752e-09	1.55353e-07	0.92438	0	0
FBgn0015035	0.796748	4.08682e-10	1.02907e-08	0.924246	0	0
FBgn0015036	0.749838	1.52212e-08	2.78794e-07	0.578876	7.06965e-05	0.000331197
FBgn0015037	0.937386	0	0	0.928715	0	0
FBgn0015038	0.68684	6.62206e-07	7.88514e-06	0.800092	3.04753e-10	4.78795e-09
FBgn0015039	0.669082	1.62751e-06	1.73128e-05	0.848444	2.10132e-12	5.64721e-11
FBgn0015040	0.821392	4.0923e-11	1.23232e-09	0.816161	6.86151e-11	1.26788e-09
FBgn0015075	0.377216	0.0149015	0.0537176	0.767569	4.28241e-09	5.04596e-08
FBgn0015218	0.430396	0.00490002	0.0203019	0.158736	0.321284	0.544047
FBgn0015221	0.606828	2.48547e-05	0.000191897	0.385052	0.0127863	0.035989
FBgn0015222	0.526495	0.000395192	0.00220532	0.346452	0.026287	0.0673217
FBgn0015229	0.751056	1.39986e-08	2.59392e-07	0.338182	0.0303556	0.0763021
FBgn0015230	0	1	1	0.768205	4.08376e-09	4.85055e-08
FBgn0015239	0.510567	0.000632057	0.00333712	5.04148e-17	1	1
FBgn0015240	0.681861	8.57461e-07	9.86284e-06	0.348543	0.0253338	0.0651546
FBgn0015245	0	1	1	1.08046e-17	1	1
FBgn0015247	0.387706	0.0121305	0.0449307	0.421998	0.00591049	0.0181419
FBgn0015268	0.541915	0.000245198	0.00144937	0.228157	0.151018	0.297109
FBgn0015269	0.168776	0.291204	0.615785	0.395448	0.0103783	0.0299409
FBgn0015270	0.620821	1.41754e-05	0.000117435	0.159872	0.317787	0.539439
FBgn0015271	0.667976	1.71785e-06	1.81766e-05	0.793004	5.63994e-10	8.30204e-09
FBgn0015277	0.411498	0.00742384	0.0292977	0.379228	0.014332	0.0397324
FBgn0015278	0.678726	1.00635e-06	1.13704e-05	0.290173	0.0654181	0.14777
FBgn0015279	0.681096	8.91761e-07	1.02089e-05	0.214535	0.177655	0.338986
FBgn0015282	0.415514	0.00680958	0.0271665	3.82138e-14	1	1
FBgn0015283	0.43247	0.00467488	0.0194717	0.367419	0.0179554	0.0482695
FBgn0015286	0.383921	0.0130749	0.0479352	0.0368148	0.819239	1
FBgn0015288	0	1	1	0	1	1
FBgn0015295	0.597693	3.53561e-05	0.000262316	0.312523	0.046399	0.110245
FBgn0015296	0.474171	0.00170283	0.00802462	0.61034	2.16418e-05	0.000113363
FBgn0015298	0.364146	0.0190864	0.066582	0.306026	0.0513969	0.120342
FBgn0015299	0.268625	0.089144	0.244353	0.122738	0.44439	0.702584
FBgn0015300	2.2359e-15	1	1	0.863277	3.19411e-13	1.02588e-11
FBgn0015316	0.756044	9.88483e-09	1.89929e-07	0.809386	1.30865e-10	2.2466e-09
FBgn0015320	0.605208	2.64786e-05	0.000202633	0.676547	1.12356e-06	7.7626e-06
FBgn0015321	0.555403	0.000158405	0.000986155	0.483735	0.00132626	0.00474836
FBgn0015323	1.91981e-15	1	1	0.555088	0.000160066	0.000697871
FBgn0015324	0.138588	0.387294	0.755967	0.261488	0.0983208	0.207784
FBgn0015331	0.0922245	0.566211	0.981925	0.0516267	0.748519	1
FBgn0015336	0.7007	3.13844e-07	4.11846e-06	0.660421	2.46961e-06	1.5822e-05
FBgn0015338	0.445488	0.00345669	0.014952	0.0130413	0.935505	1
FBgn0015351	0.444344	0.00355127	0.0152946	0.309269	0.0488504	0.115155
FBgn0015359	0.158364	0.322434	0.663043	0.451216	0.00301537	0.00994432
FBgn0015360	0.431558	0.00477271	0.0198297	0.0249925	0.876741	1
FBgn0015371	0.556423	0.000153142	0.000957619	0.280607	0.0752452	0.166221
FBgn0015372	0.27749	0.0786847	0.221022	0.500264	0.000846193	0.00315282
FBgn0015374	0.360219	0.0205219	0.0708732	0.250685	0.113567	0.233994
FBgn0015376	0.768021	4.14016e-09	8.48174e-08	0.771744	3.12562e-09	3.8108e-08
FBgn0015379	0.226942	0.153268	0.376458	0.276496	0.0798079	0.174603
FBgn0015380	0.659989	2.52071e-06	2.54684e-05	0.0605309	0.70692	0.993636
FBgn0015381	0	1	1	0.402677	0.00894232	0.0262425
FBgn0015391	0.58556	5.55445e-05	0.000390428	0.445211	0.00347937	0.0112806
FBgn0015393	0.669901	1.56352e-06	1.67321e-05	0.0337664	0.833989	1
FBgn0015396	0.648451	4.30073e-06	4.08534e-05	0.642434	5.63303e-06	3.33432e-05
FBgn0015399	0.825654	2.65238e-11	8.27449e-10	0.474133	0.00170451	0.00595189
FBgn0015400	0.337399	0.0307663	0.10035	0.363931	0.0191627	0.0511242
FBgn0015402	9.9632e-17	1	1	0.434757	0.00443715	0.0140342
FBgn0015477	0.400458	0.00936364	0.0358744	0.178008	0.265202	0.46772
FBgn0015509	0.708985	1.96787e-07	2.73023e-06	0.252093	0.111484	0.230468
FBgn0015513	0.599613	3.28612e-05	0.000246316	0.257885	0.103221	0.216498
FBgn0015519	0.481699	0.00139958	0.00674311	0.48614	0.00124404	0.00447753
FBgn0015520	0.680087	9.38998e-07	1.06952e-05	0.700934	3.09794e-07	2.4213e-06
FBgn0015521	0.0745609	0.643082	1	0.173231	0.278457	0.486314
FBgn0015522	0.945865	0	0	0.603817	2.79501e-05	0.000143012
FBgn0015524	0.440655	0.00387192	0.0165095	0.255465	0.106614	0.222072
FBgn0015527	0.286505	0.0690587	0.198298	0.0290743	0.856802	1
FBgn0015541	0.766347	4.69023e-09	9.53182e-08	0.709067	1.9587e-07	1.60719e-06
FBgn0015543	0.481372	0.00141167	0.00679549	0.430543	0.00488372	0.015292
FBgn0015544	0.297199	0.0588705	0.173886	0.536591	0.000289881	0.00119346
FBgn0015546	0.736398	3.71961e-08	6.25179e-07	0.467556	0.00201581	0.00692119
FBgn0015550	0.362142	0.0198082	0.0687311	0.112586	0.483249	0.749041
FBgn0015553	0.555349	0.00015869	0.000987566	0.241309	0.128193	0.259007
FBgn0015558	0.674151	1.26697e-06	1.38747e-05	0.122692	0.444561	0.702723
FBgn0015561	0.0241235	0.880996	1	0.117568	0.463961	0.725647
FBgn0015568	0.797443	3.84682e-10	9.73713e-09	0.703616	2.66781e-07	2.12607e-06
FBgn0015569	0.901168	7.77156e-16	5.84024e-14	0.659264	2.60846e-06	1.66458e-05
FBgn0015570	0.891358	4.55191e-15	2.95455e-13	0.863995	2.8999e-13	9.41143e-12
FBgn0015571	0.320883	0.0405544	0.126656	0.499713	0.000859281	0.003196
FBgn0015572	0.400015	0.00944978	0.0361374	0.467988	0.00199389	0.00685145
FBgn0015574	0.443567	0.00361678	0.0155411	0.813357	8.99206e-11	1.60758e-09
FBgn0015575	0.765547	4.97644e-09	1.00411e-07	0.487169	0.00121028	0.00436892
FBgn0015576	0.565904	0.000111249	0.000721402	0.636019	7.46297e-06	4.3046e-05
FBgn0015577	0.555829	0.000156188	0.000973965	0.455512	0.00271756	0.00906039
FBgn0015582	0.527015	0.000389031	0.00217416	0.0728273	0.650846	0.935986
FBgn0015583	0.0699325	0.663892	1	0.941509	0	0
FBgn0015584	0.118553	0.460198	0.85302	0.626815	1.10514e-05	6.16968e-05
FBgn0015585	1.79292e-20	1	1	0.560307	0.000134504	0.000594951
FBgn0015586	2.0143e-15	1	1	0.584503	5.77247e-05	0.000276237
FBgn0015589	0.394728	0.0105316	0.0397041	0.429682	0.00497967	0.0155495
FBgn0015591	0.683739	7.78301e-07	9.07579e-06	0.696429	3.9678e-07	3.02891e-06
FBgn0015600	0.398949	0.00965995	0.0368453	0.647774	4.43467e-06	2.69136e-05
FBgn0015602	0.66437	2.04542e-06	2.11918e-05	0.0229579	0.886708	1
FBgn0015609	0.511055	0.000623239	0.00329468	0.537874	0.000278486	0.00115254
FBgn0015614	0.544699	0.000224395	0.0013407	0.274088	0.0825799	0.179469
FBgn0015615	0.528225	0.000375016	0.00210523	7.81071e-17	1	1
FBgn0015618	0.342172	0.0283322	0.0935562	0	1	1
FBgn0015621	0.255519	0.106537	0.281903	0	1	1
FBgn0015622	0.603241	2.85799e-05	0.000216896	0.506801	0.000703949	0.00266627
FBgn0015623	0.562106	0.000126592	0.00080987	0.562657	0.000124254	0.000554071
FBgn0015625	0.567557	0.000105114	0.000686094	0.442959	0.00366884	0.0118348
FBgn0015663	0.936089	0	0	0.842877	4.04943e-12	1.01839e-10
FBgn0015664	0.664518	2.03092e-06	2.10609e-05	0.0709382	0.659348	0.945629
FBgn0015714	0.960763	0	0	0.96529	0	0
FBgn0015721	0.326584	0.0369236	0.117134	0.829852	1.71037e-11	3.69354e-10
FBgn0015737	0.419058	0.00630454	0.0253388	0.489465	0.00113782	0.00412571
FBgn0015754	0.431224	0.00480904	0.019969	0.173121	0.278767	0.486658
FBgn0015756	2.72499e-16	1	1	0.0376188	0.815358	1
FBgn0015765	0.71208	1.64617e-07	2.33021e-06	0.979848	0	0
FBgn0015766	0.647244	4.54222e-06	4.28943e-05	0.636927	7.17448e-06	4.15437e-05
FBgn0015770	0	1	1	0.684706	7.40218e-07	5.31363e-06
FBgn0015772	0.359033	0.0209729	0.0722412	0.336724	0.031124	0.0779791
FBgn0015773	0.77648	2.16918e-09	4.71171e-08	0.573531	8.54162e-05	0.000393661
FBgn0015774	0.638778	6.61773e-06	5.95824e-05	0.575352	8.01139e-05	0.000371282
FBgn0015776	0.815753	7.13913e-11	2.06876e-09	0.610653	2.13747e-05	0.000112198
FBgn0015777	0.446123	0.00340507	0.0147608	0.450395	0.00307543	0.010113
FBgn0015778	0.51741	0.000518045	0.00279941	0.547542	0.000204805	0.000874579
FBgn0015781	0.328723	0.0356316	0.113614	0.313638	0.0455826	0.108578
FBgn0015789	0.668816	1.64887e-06	1.75295e-05	0.464769	0.00216215	0.00738274
FBgn0015790	0.413786	0.00706833	0.0280419	0.401465	0.00917033	0.0268284
FBgn0015791	0.779302	1.73759e-09	3.84052e-08	0.658728	2.67527e-06	1.70402e-05
FBgn0015793	0.320837	0.0405849	0.126727	0.535538	0.000299537	0.00123009
FBgn0015794	0	1	1	0	1	1
FBgn0015795	0.146761	0.359618	0.717602	0.17007	0.287462	0.498186
FBgn0015797	0.480724	0.00143594	0.00690252	0.281896	0.0738574	0.163718
FBgn0015799	0.307888	0.0499223	0.151278	0.116236	0.469076	0.731498
FBgn0015801	0.42692	0.00529839	0.0217341	0.0822685	0.609023	0.890945
FBgn0015803	0.613946	1.87425e-05	0.000150015	0.611316	2.08192e-05	0.000109569
FBgn0015805	0.634684	7.9065e-06	6.99932e-05	0.253259	0.109782	0.227474
FBgn0015806	0.680894	9.01049e-07	1.02977e-05	0.604104	2.76399e-05	0.000141573
FBgn0015808	0.55734	0.000148544	0.000932661	0.447295	0.00331174	0.0108005
FBgn0015818	0.0942098	0.557842	0.971789	0.133604	0.404765	0.653302
FBgn0015828	0.391841	0.0111657	0.041769	0.273246	0.0835656	0.181345
FBgn0015829	0.152189	0.341911	0.692001	0.294864	0.0609857	0.139215
FBgn0015831	0.126162	0.431678	0.816263	0.646242	4.75198e-06	2.86557e-05
FBgn0015834	0.0240191	0.881507	1	0.227797	0.151682	0.298159
FBgn0015838	0.697293	3.78532e-07	4.8543e-06	0.043256	0.788276	1
FBgn0015872	0.657834	2.78999e-06	2.79057e-05	0.656179	3.01454e-06	1.89672e-05
FBgn0015903	0.794879	4.80394e-10	1.18407e-08	0.350805	0.0243345	0.0628408
FBgn0015904	5.32784e-16	1	1	0.189598	0.2348	0.424899
FBgn0015905	0.620059	1.46262e-05	0.000120873	0.791471	6.42294e-10	9.36162e-09
FBgn0015907	0.38097	0.0138538	0.050381	0.42491	0.00554143	0.017131
FBgn0015919	0.0467768	0.771483	1	0.614994	1.79689e-05	9.60513e-05
FBgn0015924	0.648201	4.34986e-06	4.12736e-05	0.261975	0.0976723	0.206697
FBgn0015925	0.648518	4.28769e-06	4.07638e-05	0.332245	0.033586	0.0832552
FBgn0015926	0.65197	3.66289e-06	3.5476e-05	0.197379	0.215773	0.397075
FBgn0015929	0.690152	5.56057e-07	6.75437e-06	0.37655	0.015094	0.041504
FBgn0015946	0.0171082	0.915455	1	0.372976	0.0161644	0.0440527
FBgn0015949	0.395551	0.0103565	0.0391576	0.333841	0.032691	0.0813579
FBgn0016013	0.621117	1.40041e-05	0.000116276	0.702653	2.81546e-07	2.2245e-06
FBgn0016031	0.835952	8.8477e-12	3.01312e-10	0.67253	1.37331e-06	9.30015e-06
FBgn0016032	0.464624	0.00216997	0.00993663	0.478963	0.00150374	0.00531292
FBgn0016034	0.66309	2.17495e-06	2.23693e-05	0.71677	1.25053e-07	1.06536e-06
FBgn0016036	0.577722	7.36638e-05	0.000502438	0.759077	7.96763e-09	8.86718e-08
FBgn0016038	0.43323	0.00459466	0.0191824	0.591558	4.45285e-05	0.000218582
FBgn0016041	0.548936	0.000195778	0.00118798	0.577573	7.40549e-05	0.000345411
FBgn0016047	0.538897	0.0002697	0.00157384	0.560155	0.000135197	0.0005978
FBgn0016053	0.738101	3.3313e-08	5.66673e-07	6.25357e-18	1	1
FBgn0016054	0.900812	7.77156e-16	5.84024e-14	0.826856	2.34206e-11	4.89935e-10
FBgn0016059	0.720876	9.78563e-08	1.47798e-06	0.525495	0.00040729	0.00162539
FBgn0016061	0.456357	0.00266214	0.011905	0.623423	1.27318e-05	7.0193e-05
FBgn0016070	0.476156	0.0016177	0.00766724	0.389491	0.0117057	0.0333328
FBgn0016075	0.573439	8.56904e-05	0.00057348	0.631085	9.22605e-06	5.23207e-05
FBgn0016076	0.319991	0.0411477	0.128177	0.203592	0.201365	0.375071
FBgn0016078	0.619468	1.49843e-05	0.000123351	0.745182	2.08734e-08	2.11445e-07
FBgn0016080	0.70521	2.43902e-07	3.31281e-06	0.645665	4.8767e-06	2.93299e-05
FBgn0016081	0.316869	0.0432811	0.133824	0.381971	0.0135853	0.0379683
FBgn0016119	0.308745	0.0492552	0.149642	0.527329	0.00038535	0.00154671
FBgn0016120	0.574201	8.34285e-05	0.00056045	0.654508	3.25811e-06	2.03532e-05
FBgn0016122	0.976514	0	0	0.94892	0	0
FBgn0016123	0.694337	4.4445e-07	5.55637e-06	0.740395	2.86792e-08	2.81887e-07
FBgn0016126	9.20037e-21	1	1	0.0677543	0.673772	0.960233
FBgn0016131	0.795116	4.70656e-10	1.16431e-08	0.611881	2.03564e-05	0.000107348
FBgn0016641	0.240939	0.128798	0.327609	0.268884	0.0888246	0.190814
FBgn0016650	0.559625	0.000137621	0.000871524	0.816735	6.48869e-11	1.20828e-09
FBgn0016660	0.379175	0.0143467	0.051924	0.610739	2.13024e-05	0.000111887
FBgn0016672	0.404175	0.00866703	0.0336039	0.473679	0.00172454	0.00601551
FBgn0016675	0.954536	0	0	0.956335	0	0
FBgn0016684	0.673083	1.33615e-06	1.45381e-05	0.730961	5.25909e-08	4.89255e-07
FBgn0016685	0.659946	2.52586e-06	2.55129e-05	0.0949063	0.55492	0.833003
FBgn0016687	0.410667	0.00755668	0.0297525	0.726317	7.02351e-08	6.32673e-07
FBgn0016691	0.402172	0.00903669	0.0347977	0.533107	0.000322952	0.00131484
FBgn0016693	0.435251	0.00438719	0.018414	0.413479	0.00711508	0.0214226
FBgn0016694	0.236534	0.136161	0.342144	0.528814	0.000368356	0.00148585
FBgn0016696	0.718072	1.15751e-07	1.71156e-06	0.58413	5.85124e-05	0.000279731
FBgn0016697	0.424843	0.00554967	0.0226276	0.278454	0.0776086	0.170547
FBgn0016698	0.642738	5.55757e-06	5.1043e-05	0.398945	0.0096607	0.0281086
FBgn0016700	0.208216	0.19109	0.447019	0.0812558	0.613454	0.89583
FBgn0016701	0.642934	5.50919e-06	5.06675e-05	0.371115	0.0167466	0.0454467
FBgn0016715	0.426394	0.00536106	0.0219649	0.523213	0.000436167	0.00172688
FBgn0016726	0.0248078	0.877645	1	0.321154	0.0403752	0.0977479
FBgn0016754	0.428896	0.00506863	0.0209389	0	1	1
FBgn0016756	0.036089	0.822745	1	0.22518	0.156573	0.306008
FBgn0016762	0.323113	0.0391008	0.122837	0.119055	0.458284	0.719178
FBgn0016792	0.628142	1.04515e-05	8.95006e-05	0.1281	0.424577	0.678062
FBgn0016794	0.488326	0.00117328	0.00577442	0.0603071	0.707956	0.99455
FBgn0016797	0.574822	8.16256e-05	0.000549648	0.543271	0.000234857	0.000990007
FBgn0016917	0.511329	0.000618334	0.00327182	0.459178	0.0024842	0.0083642
FBgn0016919	0.610321	2.16586e-05	0.000170809	0.764285	5.46108e-09	6.29132e-08
FBgn0016920	0.220959	0.164703	0.398381	0.620655	1.42726e-05	7.79308e-05
FBgn0016926	0.824941	2.85429e-11	8.83108e-10	0.567312	0.000106006	0.000479729
FBgn0016930	0.585754	5.51526e-05	0.000387834	0.571837	9.06297e-05	0.000415609
FBgn0016970	0.594938	3.92369e-05	0.000287327	0.692719	4.84871e-07	3.62266e-06
FBgn0016974	0.885981	1.11022e-14	6.71635e-13	0.690747	5.38739e-07	3.98321e-06
FBgn0016977	0.0922637	0.566045	0.981688	0.419653	0.00622309	0.0190226
FBgn0016978	0.214749	0.177212	0.421847	0.293553	0.0621999	0.141693
FBgn0016983	0.676282	1.13867e-06	1.26666e-05	0.220661	0.165288	0.31972
FBgn0016984	0.551066	0.000182674	0.0011185	0.356347	0.0220247	0.0577292
FBgn0017414	0.790979	6.6956e-10	1.60585e-08	0.729561	5.742e-08	5.2841e-07
FBgn0017418	0.301968	0.0547322	0.163505	0.498873	0.000879578	0.00326472
FBgn0017429	0	1	1	0	1	1
FBgn0017430	0.43304	0.00461465	0.0192516	0.42022	0.00614624	0.0188147
FBgn0017448	0.870703	1.14242e-13	5.73193e-12	0.706228	2.3026e-07	1.85721e-06
FBgn0017456	0.0296285	0.854101	1	0.622187	1.33997e-05	7.35185e-05
FBgn0017457	0.502339	0.000798492	0.00410623	0.292012	0.0636513	0.144497
FBgn0017482	0.705272	2.43056e-07	3.30363e-06	0.789959	7.29428e-10	1.04662e-08
FBgn0017545	0.35378	0.0230708	0.0783084	0.28264	0.0730648	0.162267
FBgn0017550	0.175599	0.271834	0.585255	0	1	1
FBgn0017551	0.560697	0.000132751	0.000845433	0.308213	0.0496684	0.116816
FBgn0017556	0.0919341	0.567439	0.983249	0.650458	3.92548e-06	2.41068e-05
FBgn0017558	0.75047	1.45748e-08	2.69037e-07	0.681958	8.53162e-07	6.0481e-06
FBgn0017561	0.432608	0.00466027	0.0194156	0.585033	5.66214e-05	0.000271376
FBgn0017566	0.626829	1.10451e-05	9.41075e-05	0.739135	3.11448e-08	3.03842e-07
FBgn0017567	0.564728	0.000115809	0.000748103	0.657776	2.7976e-06	1.77267e-05
FBgn0017572	0.302164	0.0545667	0.163126	0.275427	0.0810295	0.176719
FBgn0017577	0.669287	1.6113e-06	1.71674e-05	0.0363016	0.821718	1
FBgn0017578	0.292575	0.0631179	0.184164	0.282383	0.0733377	0.162788
FBgn0017579	0	1	1	0	1	1
FBgn0017581	0.518689	0.000498901	0.00270634	0.519269	0.000490434	0.00192341
FBgn0017590	0.161718	0.312153	0.647018	0.448569	0.00321276	0.0105149
FBgn0019624	0.545796	0.000216641	0.00129804	0.609072	2.27555e-05	0.00011846
FBgn0019637	0.00921907	0.954385	1	0	1	1
FBgn0019643	0.3948	0.0105162	0.0396594	0.250989	0.113115	0.233232
FBgn0019644	0.514964	0.000556483	0.00298322	0.595031	3.90998e-05	0.000194285
FBgn0019650	0.242172	0.126791	0.323722	0.345713	0.0266315	0.0681017
FBgn0019660	0.325523	0.0375786	0.118864	0.00138923	0.993123	1
FBgn0019661	0.467686	0.00200917	0.00928707	0.459502	0.00246445	0.00830508
FBgn0019662	0.357728	0.0214784	0.0736648	0.366949	0.0181145	0.048632
FBgn0019686	0.723496	8.34966e-08	1.28171e-06	1.29529e-17	1	1
FBgn0019809	0.0538835	0.737903	1	0.349861	0.0247473	0.0637667
FBgn0019828	0	1	1	0.731409	5.11265e-08	4.76934e-07
FBgn0019830	0.323765	0.0386839	0.121713	0.341808	0.0285121	0.0722761
FBgn0019886	0.341	0.0289147	0.0951731	0.26915	0.0884963	0.19024
FBgn0019890	0.626369	1.12603e-05	9.57e-05	0.383966	0.0130633	0.0366595
FBgn0019925	0.423698	0.00569246	0.0231206	0.339996	0.0294215	0.0742388
FBgn0019928	0.689314	5.8132e-07	7.01838e-06	0.70784	2.10105e-07	1.71163e-06
FBgn0019929	0.55998	0.000135993	0.000862503	0.520741	0.000469509	0.00184858
FBgn0019932	0.451132	0.00302142	0.0132954	0.334797	0.0321641	0.0802325
FBgn0019936	0.0529052	0.742499	1	0	1	1
FBgn0019938	0.78962	7.50424e-10	1.7821e-08	0.186761	0.242011	0.435313
FBgn0019940	0.498031	0.000900353	0.00455933	0.495144	0.000974933	0.00358004
FBgn0019947	0.261203	0.0987019	0.265149	0	1	1
FBgn0019948	0.663406	2.14229e-06	2.20872e-05	0.0317082	0.843981	1
FBgn0019949	0.474005	0.00171013	0.00805564	7.38847e-18	1	1
FBgn0019952	0.633523	8.31187e-06	7.30739e-05	0.531116	0.000343349	0.001392
FBgn0019957	0.758991	8.01705e-09	1.56532e-07	0.770884	3.33687e-09	4.04232e-08
FBgn0019960	0.331547	0.0339833	0.10922	0.424949	0.00553654	0.017119
FBgn0019968	0.775329	2.37247e-09	5.10693e-08	0.849773	1.7899e-12	4.8913e-11
FBgn0019972	0.722248	9.00741e-08	1.36901e-06	0.516475	0.00053244	0.00207312
FBgn0019982	0.296522	0.0594775	0.175419	0.592203	4.34726e-05	0.00021417
FBgn0019985	0.845479	2.98983e-12	1.13222e-10	0.422386	0.00586009	0.0180098
FBgn0019990	0.884158	1.4988e-14	8.92341e-13	0.579659	6.87447e-05	0.000322995
FBgn0020018	0.459344	0.00247403	0.0111434	0.599455	3.30601e-05	0.000166778
FBgn0020224	0.580529	6.66338e-05	0.000459681	0.348265	0.0254587	0.0654512
FBgn0020235	0.393378	0.0108241	0.040644	0.529767	0.000357808	0.00144639
FBgn0020236	0.715215	1.37068e-07	1.98341e-06	0.8084	1.43455e-10	2.44793e-09
FBgn0020238	0.669808	1.57066e-06	1.67926e-05	0.39727	0.00999891	0.0289813
FBgn0020248	0.672611	1.3678e-06	1.48348e-05	0.302141	0.0545859	0.126625
FBgn0020249	0.483124	0.0013479	0.00652661	0.588865	4.92019e-05	0.000239146
FBgn0020251	0.45962	0.00245728	0.0110709	0.254683	0.107729	0.223873
FBgn0020255	0.638079	6.82323e-06	6.12371e-05	0.487007	0.00121551	0.00438504
FBgn0020257	0.227752	0.151766	0.373093	0.266589	0.0916918	0.196046
FBgn0020258	0.369565	0.017245	0.0609634	0.308078	0.0497734	0.117023
FBgn0020261	0	1	1	0.265952	0.0924999	0.197459
FBgn0020269	0.626337	1.12754e-05	9.57798e-05	0.652322	3.6041e-06	2.23425e-05
FBgn0020270	0.758433	8.34321e-09	1.62524e-07	0.766803	4.53411e-09	5.31689e-08
FBgn0020272	0.55134	0.000181045	0.00110973	0.207826	0.191942	0.360723
FBgn0020277	0.0100452	0.950302	1	0.441477	0.00379834	0.0122052
FBgn0020278	0.317253	0.0430137	0.133071	0.135456	0.398222	0.645003
FBgn0020279	0.0291253	0.856553	1	0	1	1
FBgn0020280	0	1	1	0.686868	6.61226e-07	4.79927e-06
FBgn0020294	0.720546	9.98236e-08	1.50434e-06	0.558032	0.000145154	0.000638496
FBgn0020299	0.537488	0.000281872	0.00163922	0.3641	0.0191027	0.05098
FBgn0020300	0.456983	0.00262168	0.0117411	0.567507	0.000105297	0.00047684
FBgn0020304	0.592641	4.27671e-05	0.000309824	0.278148	0.077949	0.171217
FBgn0020305	0.420441	0.00611645	0.0246679	8.00672e-14	1	1
FBgn0020306	0.284529	0.0710845	0.203098	0.114603	0.47539	0.73945
FBgn0020307	0.224582	0.157707	0.38504	0.369753	0.017184	0.0464634
FBgn0020309	0.672329	1.38706e-06	1.50196e-05	0.684205	7.59709e-07	5.4365e-06
FBgn0020312	0.727695	6.4495e-08	1.01538e-06	0.304552	0.0525889	0.122694
FBgn0020369	0.333008	0.0331553	0.106894	3.1393e-21	1	1
FBgn0020370	0.64617	4.76727e-06	4.47074e-05	0.102027	0.525464	0.799094
FBgn0020371	0.151052	0.345576	0.697484	0.68435	7.5401e-07	5.40138e-06
FBgn0020372	0.512191	0.000603148	0.00320212	0.5638	0.000119525	0.000535225
FBgn0020376	3.79394e-15	1	1	0.353074	0.0233654	0.0607109
FBgn0020377	0.254414	0.108114	0.285253	0.737256	3.51898e-08	3.3961e-07
FBgn0020378	0.496432	0.000940992	0.00474382	0.301922	0.0547707	0.126976
FBgn0020379	0.318113	0.0424203	0.131487	0.453667	0.00284217	0.00942697
FBgn0020381	0.7126	1.59721e-07	2.26944e-06	0.0594935	0.711726	0.99847
FBgn0020385	0.565324	0.000113479	0.000734314	0.589943	4.72807e-05	0.000230762
FBgn0020386	0.744525	2.1812e-08	3.84523e-07	0.442044	0.00374838	0.0120663
FBgn0020388	0.494717	0.000986412	0.00495212	0.208234	0.191051	0.359396
FBgn0020389	0.447696	0.0032803	0.0142914	0.355918	0.0221965	0.0581124
FBgn0020391	0.0402253	0.802808	1	0.171032	0.284702	0.49451
FBgn0020392	0.561144	0.000130772	0.000834243	6.91286e-17	1	1
FBgn0020399	1.5089e-16	1	1	0.626078	1.13984e-05	6.34369e-05
FBgn0020407	0.60445	2.72712e-05	0.000207943	0.329152	0.0353773	0.0871253
FBgn0020412	0	1	1	0.381938	0.0135942	0.0379899
FBgn0020414	0.888875	6.88338e-15	4.34282e-13	0.920453	0	0
FBgn0020415	0.872614	8.68194e-14	4.42832e-12	0.809465	1.29904e-10	2.23121e-09
FBgn0020416	0.685833	6.98022e-07	8.25061e-06	0.660627	2.44562e-06	1.5683e-05
FBgn0020429	0.132467	0.408814	0.784568	0	1	1
FBgn0020440	0.534455	0.000309777	0.00177942	5.27092e-17	1	1
FBgn0020443	0.480044	0.00146178	0.00701432	0.346663	0.0261897	0.0671236
FBgn0020445	0.78872	8.08928e-10	1.90897e-08	0.649252	4.14727e-06	2.53319e-05
FBgn0020493	0.778814	1.80591e-09	3.98112e-08	0.368654	0.0175436	0.047282
FBgn0020496	0.637135	7.10984e-06	6.36404e-05	0.153385	0.338086	0.566224
FBgn0020497	0.532904	0.00032498	0.0018542	0.0151476	0.925115	1
FBgn0020503	0.686704	6.66934e-07	7.93586e-06	0.474834	0.00167399	0.00585734
FBgn0020506	0.674295	1.25784e-06	1.37926e-05	0.728465	6.14834e-08	5.61256e-07
FBgn0020508	0.888355	7.54952e-15	4.74539e-13	0.856628	7.62723e-13	2.26603e-11
FBgn0020509	0.272477	0.0844743	0.234153	0.562171	0.000126314	0.000562005
FBgn0020510	0.544135	0.000228478	0.00136245	0.11841	0.460741	0.722135
FBgn0020513	0.317524	0.042826	0.132635	0.573507	8.54873e-05	0.000393882
FBgn0020518	8.82503e-17	1	1	9.53567e-21	1	1
FBgn0020521	0.479374	0.00148767	0.00712584	0.457573	0.00258413	0.00866641
FBgn0020545	0.739111	3.1193e-08	5.33024e-07	0.760633	7.1242e-09	8.01226e-08
FBgn0020556	0.363352	0.0193696	0.0673892	0.286825	0.0687347	0.153985
FBgn0020616	0.591743	4.42237e-05	0.000318737	0.681917	8.54978e-07	6.05971e-06
FBgn0020617	0	1	1	0.226467	0.154153	0.302214
FBgn0020618	0	1	1	0.055796	0.728945	1
FBgn0020620	0.386601	0.0123998	0.0458229	0.225144	0.156641	0.306105
FBgn0020621	0.659547	2.57384e-06	2.59433e-05	0.277383	0.0788055	0.172687
FBgn0020622	0.68316	8.01939e-07	9.30332e-06	0.282804	0.0728911	0.161945
FBgn0020626	0.0766177	0.633919	1	0.300883	0.0556525	0.128661
FBgn0020633	0.690276	5.52408e-07	6.72281e-06	0.223262	0.160231	0.311654
FBgn0020637	0.662257	2.26331e-06	2.31864e-05	0.333198	0.0330488	0.0821327
FBgn0020638	0.641598	5.84548e-06	5.33972e-05	0.0224413	0.889241	1
FBgn0020639	0.501422	0.000819256	0.00420024	1.71912e-15	1	1
FBgn0020640	0	1	1	0	1	1
FBgn0020641	0	1	1	0.19675	0.217269	0.399239
FBgn0020642	0.438885	0.00403456	0.0171209	0.213546	0.179712	0.342048
FBgn0020645	0.227854	0.151578	0.372847	0	1	1
FBgn0020647	0.32227	0.0396452	0.124229	0.374187	0.0157947	0.0431868
FBgn0020653	0.0563989	0.726128	1	2.46653e-18	1	1
FBgn0020655	0.10227	0.524471	0.932151	0.110313	0.492183	0.759331
FBgn0020660	0.142705	0.373199	0.735415	0.139915	0.382718	0.625301
FBgn0020762	0.721655	9.33629e-08	1.41772e-06	0.633349	8.37438e-06	4.78881e-05
FBgn0020764	0.471283	0.00183375	0.00856283	0.361223	0.0201465	0.0533799
FBgn0020765	0.459011	0.00249443	0.0112277	0.143872	0.36926	0.608534
FBgn0020766	0.444488	0.00353926	0.0152498	0.675778	1.16789e-06	8.03514e-06
FBgn0020767	0.778125	1.90688e-09	4.19278e-08	0.426428	0.00535695	0.0166074
FBgn0020880	0.0345609	0.830139	1	0.422272	0.00587488	0.0180473
FBgn0020887	0.484349	0.00130482	0.0063371	0.287979	0.0675771	0.151761
FBgn0020906	0.824515	2.98159e-11	9.18293e-10	0.827897	2.10124e-11	4.43918e-10
FBgn0020907	0.615596	1.75379e-05	0.000141688	0.79679	4.07193e-10	6.20014e-09
FBgn0020908	0.421683	0.00595168	0.0240809	0.584779	5.71482e-05	0.000273786
FBgn0020909	0.304745	0.0524312	0.157634	0.250144	0.114375	0.235303
FBgn0020910	0.135611	0.397675	0.769655	0	1	1
FBgn0020912	0.271968	0.085081	0.235487	0.403117	0.00886058	0.026025
FBgn0020930	0.0416777	0.795835	1	0.680993	8.96506e-07	6.31726e-06
FBgn0021738	0.228983	0.149503	0.36879	0.498462	0.000889648	0.00329586
FBgn0021742	0	1	1	0.172708	0.279934	0.488019
FBgn0021750	0.447206	0.0033187	0.0144382	0.0339137	0.833275	1
FBgn0021760	0.41555	0.00680437	0.0271527	0.699785	3.30128e-07	2.56785e-06
FBgn0021761	0.625944	1.14625e-05	9.71983e-05	0	1	1
FBgn0021764	0.136031	0.396203	0.76808	0.413957	0.0070423	0.0212353
FBgn0021765	0	1	1	0.28607	0.0695002	0.155486
FBgn0021767	0.187	0.241398	0.533901	0.412812	0.00721775	0.0216953
FBgn0021768	0.484239	0.00130864	0.00635381	0.685402	7.13877e-07	5.14309e-06
FBgn0021776	0.680455	9.2153e-07	1.05104e-05	0.579231	6.98063e-05	0.000327432
FBgn0021795	8.40042e-20	1	1	0.121272	0.449892	0.709112
FBgn0021796	0.165014	0.302254	0.631984	0.231422	0.145092	0.287644
FBgn0021800	0.69741	3.7611e-07	4.82874e-06	0.275138	0.0813622	0.177377
FBgn0021814	0.0512744	0.75018	1	0.107954	0.501547	0.770603
FBgn0021818	0.239835	0.130614	0.331461	0.545348	0.000219778	0.000932675
FBgn0021825	0.15294	0.339505	0.688312	2.58671e-14	1	1
FBgn0021847	0.464283	0.00218859	0.0100137	0.174759	0.274171	0.480479
FBgn0021856	0.345903	0.0265426	0.0883889	0.216706	0.1732	0.332252
FBgn0021872	0.373457	0.0160168	0.0572195	0.182263	0.253752	0.451593
FBgn0021874	0.24691	0.119296	0.308226	0.510119	0.000640249	0.00244731
FBgn0021875	0.364254	0.0190483	0.0664833	0.254099	0.108567	0.225341
FBgn0021895	0.127737	0.425901	0.80846	0.157563	0.32492	0.548841
FBgn0021906	0.594461	3.99481e-05	0.000291903	0.645321	4.95262e-06	2.97445e-05
FBgn0021944	0	1	1	0.37789	0.0147085	0.0406011
FBgn0021967	0.489438	0.00113867	0.00562144	0.539655	0.000263348	0.00109649
FBgn0021979	0.612623	1.97623e-05	0.000157358	0.173666	0.277232	0.484572
FBgn0021995	0.563364	0.000121312	0.000779457	0.47207	0.00179721	0.00624425
FBgn0022023	2.13106e-17	1	1	0	1	1
FBgn0022027	0.168169	0.292966	0.618159	0.0974042	0.5445	0.820469
FBgn0022029	0.810095	1.22469e-10	3.41712e-09	0	1	1
FBgn0022069	0.644839	5.06057e-06	4.70794e-05	0.267312	0.0907803	0.194341
FBgn0022097	0.116063	0.469741	0.864891	0.315157	0.0444882	0.10641
FBgn0022153	0.429252	0.00502809	0.0207867	0.0848277	0.597886	0.879039
FBgn0022160	0.542246	0.000242634	0.00143673	0.59933	3.32186e-05	0.000167419
FBgn0022213	0.577039	7.54716e-05	0.000512392	0.269262	0.0883589	0.190017
FBgn0022224	0	1	1	0	1	1
FBgn0022238	0.200702	0.20798	0.477059	0.25086	0.113307	0.2336
FBgn0022246	0.396209	0.0102184	0.0387005	0.199639	0.210451	0.38887
FBgn0022288	0.386205	0.0124979	0.0461479	0.529137	0.000364749	0.00147289
FBgn0022338	0.775356	2.36762e-09	5.09973e-08	0.430243	0.00491695	0.0153791
FBgn0022343	0.108875	0.497881	0.899981	0.0525604	0.744121	1
FBgn0022344	0.145907	0.362451	0.721595	0.486611	0.00122848	0.00442674
FBgn0022349	0.683561	7.85496e-07	9.15024e-06	0.0880017	0.5842	0.864548
FBgn0022355	0.797988	3.66774e-10	9.31869e-09	0.774845	2.46319e-09	3.08143e-08
FBgn0022359	0.956629	0	0	0.91765	0	0
FBgn0022361	2.58425e-16	1	1	0.15889	0.32081	0.543488
FBgn0022382	0.293819	0.0619519	0.181278	0.163806	0.305859	0.523335
FBgn0022699	0.354449	0.0227943	0.0775097	0	1	1
FBgn0022700	0.759157	7.92222e-09	1.54948e-07	0.81304	9.26818e-11	1.65098e-09
FBgn0022702	0.909807	1.11022e-16	9.3861e-15	0.718986	1.09609e-07	9.45605e-07
FBgn0022708	0.104316	0.516163	0.921968	0.351955	0.0238394	0.0617635
FBgn0022709	0.482002	0.00138845	0.00669804	0.541245	0.000250457	0.00104799
FBgn0022710	0.538153	0.000276067	0.00160823	0.444052	0.00357576	0.0115608
FBgn0022720	0.621344	1.38738e-05	0.000115389	0.0726612	0.651592	0.93685
FBgn0022724	0.532129	0.000332831	0.00189612	0.215935	0.174772	0.334478
FBgn0022740	5.41994e-16	1	1	0.513567	0.000579575	0.00223673
FBgn0022764	0.114035	0.477595	0.874246	7.76651e-17	1	1
FBgn0022768	0.188422	0.23777	0.527846	0.372812	0.016215	0.0441692
FBgn0022770	0.311845	0.0469014	0.143535	0.444009	0.00357943	0.0115716
FBgn0022772	0.570784	9.40144e-05	0.00062144	0.173219	0.278491	0.48635
FBgn0022774	0.927686	0	0	0.734728	4.14063e-08	3.93695e-07
FBgn0022786	0.565871	0.000111376	0.000722084	0.102604	0.523111	0.796339
FBgn0022787	0.394628	0.0105531	0.039763	0.511176	0.000621078	0.00238285
FBgn0022800	0.450446	0.00307164	0.0134971	0.362672	0.019615	0.0521797
FBgn0022893	0.898229	1.33227e-15	9.62677e-14	0.403879	0.00872086	0.0256721
FBgn0022935	0.281021	0.0747964	0.211966	2.288e-16	1	1
FBgn0022936	0.747317	1.80748e-08	3.25298e-07	0.0536397	0.739048	1
FBgn0022942	0.621196	1.39586e-05	0.00011598	0.147317	0.357777	0.592994
FBgn0022943	0.484976	0.00128323	0.00624208	0.358665	0.0211144	0.0556427
FBgn0022959	0	1	1	0.197505	0.215473	0.396688
FBgn0022960	0.617864	1.59976e-05	0.0001308	0.166448	0.29801	0.51266
FBgn0022981	0.98491	0	0	0.83341	1.16821e-11	2.64161e-10
FBgn0022984	0.463003	0.00225965	0.0102943	0.506099	0.000718121	0.00271663
FBgn0022985	0.438791	0.00404332	0.0171423	0.347519	0.0257969	0.0662207
[truncated: 32,094 more rows]
