# Supplementary material for: Systems genetics of the Drosophila metabolome
Source: Genome Res. 2020 Mar;30(3):392–405. doi: 10.1101/gr.243030.118 (PMC7111526; doi:10.1101/gr.243030.118)
Supplement: Supplemental Material [file supp_gr.243030.118_Supplemental_Table_S12.xlsx.xlsx]

## Sheet: A. Females
Supplemental Table S12. Polymorphic markers, candidate genes and metabolites associated with phenotypic variation. MAF stands for minor allele frequency; meQTL stands for metabolite expression QTL. (A) Females. (B) Males.
Trait	Metabolite	Metabolite ID	Metabolite Trait Correlation Coefficient	Metabolite Trait Correlation P-value	Gene ID	Gene Body	Gene Metabolite Correlation Coefficient	Gene Metabolite Correlation P-value	meQTL	MAF	mQTL P-value	eQTL P-value	eQTL Corrected P-value	eQTL Annotation	Trait	Gene Trait Correlation Coefficient	Gene Trait Correlation P-value	QTL P-value
Body Weight	1-palmitoyl-2-linoleoyl-GPI (16:0/18:2)	52450	-0.33283	0.0359	FBgn0032350	2L:11151506-11155721	0.46154	0.0031	2L_10417609_SNP	0.2051	6.44058e-07	0.0004829	0.000617284	SiteClass[FBgn0032243|Klp31E|SYNONYMOUS_CODING|0],TranscriptAnnot[SYNONYMOUS_CODING(LOW|SILENT|tcT/tcC|S820|1048|Klp31E|protein_coding|CODING|FBtr0302039|10|1);SYNONYMOUS_CODING(LOW|SILENT|tcT/tcC|S819|1047|Klp31E|protein_coding|CODING|FBtr0331642|10|1);SYNONYMOUS_CODING(LOW|SILENT|tcT/tcC|S820|1048|Klp31E|protein_coding|CODING|FBtr0302038|9|1);SYNONYMOUS_CODING(LOW|SILENT|tcT/tcC|S820|1048|Klp31…	Body Weight	-0.01043	0.9498	0.0356172
Body Weight	1-palmitoyl-2-linoleoyl-GPI (16:0/18:2)	52450	-0.33283	0.0359	FBgn0085419	2R:14427090-14436474	-0.47328	0.0023	2L_10417609_SNP	0.2051	6.44058e-07	8.014e-05	0.000617284	SiteClass[FBgn0032243|Klp31E|SYNONYMOUS_CODING|0],TranscriptAnnot[SYNONYMOUS_CODING(LOW|SILENT|tcT/tcC|S820|1048|Klp31E|protein_coding|CODING|FBtr0302039|10|1);SYNONYMOUS_CODING(LOW|SILENT|tcT/tcC|S819|1047|Klp31E|protein_coding|CODING|FBtr0331642|10|1);SYNONYMOUS_CODING(LOW|SILENT|tcT/tcC|S820|1048|Klp31E|protein_coding|CODING|FBtr0302038|9|1);SYNONYMOUS_CODING(LOW|SILENT|tcT/tcC|S820|1048|Klp31…	Body Weight	-0.033	0.8419	0.0356172
Body Weight	histamine	1574	-0.38248	0.0149	FBgn0038654	3R:14701250-14702926	0.49284	0.0014	2L_10819377_SNP	0.2051	1.69528e-06	0.0007479	0.00172414	SiteClass[FBgn0032303|CG6508|SYNONYMOUS_CODING|0;FBgn0011676|Nos|INTRON|0],TranscriptAnnot[SYNONYMOUS_CODING(LOW|SILENT|caG/caA|Q85|423|CG6508|protein_coding|CODING|FBtr0080139|1|1);INTRON(MODIFIER||||1349|Nos|protein_coding|CODING|FBtr0080188|8|1);INTRON(MODIFIER||||756|Nos|protein_coding|CODING|FBtr0100489|8|1);INTRON(MODIFIER||||1098|Nos|protein_coding|CODING|FBtr0343888|6|1)]	Body Weight	-0.01893	0.9089	0.378318
Body Weight	histamine	1574	-0.38248	0.0149	FBgn0036266	3L:12197223-12199122	-0.45377	0.0037	2L_10819377_SNP	0.2051	1.69528e-06	0.0001114	0.00172414	SiteClass[FBgn0032303|CG6508|SYNONYMOUS_CODING|0;FBgn0011676|Nos|INTRON|0],TranscriptAnnot[SYNONYMOUS_CODING(LOW|SILENT|caG/caA|Q85|423|CG6508|protein_coding|CODING|FBtr0080139|1|1);INTRON(MODIFIER||||1349|Nos|protein_coding|CODING|FBtr0080188|8|1);INTRON(MODIFIER||||756|Nos|protein_coding|CODING|FBtr0100489|8|1);INTRON(MODIFIER||||1098|Nos|protein_coding|CODING|FBtr0343888|6|1)]	Body Weight	0.21469	0.1894	0.378318
Body Weight	histamine	1574	-0.38248	0.0149	FBgn0034725	2R:18291682-18296045	-0.45832	0.0033	2L_10819377_SNP	0.2051	1.69528e-06	2.941e-05	0.00172414	SiteClass[FBgn0032303|CG6508|SYNONYMOUS_CODING|0;FBgn0011676|Nos|INTRON|0],TranscriptAnnot[SYNONYMOUS_CODING(LOW|SILENT|caG/caA|Q85|423|CG6508|protein_coding|CODING|FBtr0080139|1|1);INTRON(MODIFIER||||1349|Nos|protein_coding|CODING|FBtr0080188|8|1);INTRON(MODIFIER||||756|Nos|protein_coding|CODING|FBtr0100489|8|1);INTRON(MODIFIER||||1098|Nos|protein_coding|CODING|FBtr0343888|6|1)]	Body Weight	-0.11387	0.49	0.378318
Body Weight	histamine	1574	-0.38248	0.0149	FBgn0085422	2L:3175112-3200496	0.54223	0.0004	2L_10819377_SNP	0.2051	1.69528e-06	0.000252	0.00172414	SiteClass[FBgn0032303|CG6508|SYNONYMOUS_CODING|0;FBgn0011676|Nos|INTRON|0],TranscriptAnnot[SYNONYMOUS_CODING(LOW|SILENT|caG/caA|Q85|423|CG6508|protein_coding|CODING|FBtr0080139|1|1);INTRON(MODIFIER||||1349|Nos|protein_coding|CODING|FBtr0080188|8|1);INTRON(MODIFIER||||756|Nos|protein_coding|CODING|FBtr0100489|8|1);INTRON(MODIFIER||||1098|Nos|protein_coding|CODING|FBtr0343888|6|1)]	Body Weight	-0.16894	0.3039	0.378318
Body Weight	histamine	1574	-0.38248	0.0149	FBgn0031150	X:20924990-20953418	-0.50013	0.0012	2L_10819377_SNP	0.2051	1.69528e-06	4.433e-05	0.00172414	SiteClass[FBgn0032303|CG6508|SYNONYMOUS_CODING|0;FBgn0011676|Nos|INTRON|0],TranscriptAnnot[SYNONYMOUS_CODING(LOW|SILENT|caG/caA|Q85|423|CG6508|protein_coding|CODING|FBtr0080139|1|1);INTRON(MODIFIER||||1349|Nos|protein_coding|CODING|FBtr0080188|8|1);INTRON(MODIFIER||||756|Nos|protein_coding|CODING|FBtr0100489|8|1);INTRON(MODIFIER||||1098|Nos|protein_coding|CODING|FBtr0343888|6|1)]	Body Weight	0.14717	0.3713	0.378318
Body Weight	histamine	1574	-0.38248	0.0149	FBgn0034725	2R:18291682-18296045	-0.45832	0.0033	2L_10819429_SNP	0.2051	9.28648e-06	1.996e-05	0.00172414	SiteClass[FBgn0032303|CG6508|NON_SYNONYMOUS_CODING|0;FBgn0011676|Nos|INTRON|0],TranscriptAnnot[NON_SYNONYMOUS_CODING(MODERATE|MISSENSE|Gta/Ata|V103I|423|CG6508|protein_coding|CODING|FBtr0080139|1|1);INTRON(MODIFIER||||1349|Nos|protein_coding|CODING|FBtr0080188|8|1);INTRON(MODIFIER||||756|Nos|protein_coding|CODING|FBtr0100489|8|1);INTRON(MODIFIER||||1098|Nos|protein_coding|CODING|FBtr0343888|6|1)]	Body Weight	-0.11387	0.49	0.457765
Body Weight	histamine	1574	-0.38248	0.0149	FBgn0085422	2L:3175112-3200496	0.54223	0.0004	2L_10819429_SNP	0.2051	9.28648e-06	0.0009475	0.00172414	SiteClass[FBgn0032303|CG6508|NON_SYNONYMOUS_CODING|0;FBgn0011676|Nos|INTRON|0],TranscriptAnnot[NON_SYNONYMOUS_CODING(MODERATE|MISSENSE|Gta/Ata|V103I|423|CG6508|protein_coding|CODING|FBtr0080139|1|1);INTRON(MODIFIER||||1349|Nos|protein_coding|CODING|FBtr0080188|8|1);INTRON(MODIFIER||||756|Nos|protein_coding|CODING|FBtr0100489|8|1);INTRON(MODIFIER||||1098|Nos|protein_coding|CODING|FBtr0343888|6|1)]	Body Weight	-0.16894	0.3039	0.457765
Body Weight	histamine	1574	-0.38248	0.0149	FBgn0036266	3L:12197223-12199122	-0.45377	0.0037	2L_10819429_SNP	0.2051	9.28648e-06	0.0001593	0.00172414	SiteClass[FBgn0032303|CG6508|NON_SYNONYMOUS_CODING|0;FBgn0011676|Nos|INTRON|0],TranscriptAnnot[NON_SYNONYMOUS_CODING(MODERATE|MISSENSE|Gta/Ata|V103I|423|CG6508|protein_coding|CODING|FBtr0080139|1|1);INTRON(MODIFIER||||1349|Nos|protein_coding|CODING|FBtr0080188|8|1);INTRON(MODIFIER||||756|Nos|protein_coding|CODING|FBtr0100489|8|1);INTRON(MODIFIER||||1098|Nos|protein_coding|CODING|FBtr0343888|6|1)]	Body Weight	0.21469	0.1894	0.457765
Body Weight	histamine	1574	-0.38248	0.0149	FBgn0038654	3R:14701250-14702926	0.49284	0.0014	2L_10819429_SNP	0.2051	9.28648e-06	0.0007279	0.00172414	SiteClass[FBgn0032303|CG6508|NON_SYNONYMOUS_CODING|0;FBgn0011676|Nos|INTRON|0],TranscriptAnnot[NON_SYNONYMOUS_CODING(MODERATE|MISSENSE|Gta/Ata|V103I|423|CG6508|protein_coding|CODING|FBtr0080139|1|1);INTRON(MODIFIER||||1349|Nos|protein_coding|CODING|FBtr0080188|8|1);INTRON(MODIFIER||||756|Nos|protein_coding|CODING|FBtr0100489|8|1);INTRON(MODIFIER||||1098|Nos|protein_coding|CODING|FBtr0343888|6|1)]	Body Weight	-0.01893	0.9089	0.457765
Body Weight	histamine	1574	-0.38248	0.0149	FBgn0031150	X:20924990-20953418	-0.50013	0.0012	2L_10819429_SNP	0.2051	9.28648e-06	8.59e-05	0.00172414	SiteClass[FBgn0032303|CG6508|NON_SYNONYMOUS_CODING|0;FBgn0011676|Nos|INTRON|0],TranscriptAnnot[NON_SYNONYMOUS_CODING(MODERATE|MISSENSE|Gta/Ata|V103I|423|CG6508|protein_coding|CODING|FBtr0080139|1|1);INTRON(MODIFIER||||1349|Nos|protein_coding|CODING|FBtr0080188|8|1);INTRON(MODIFIER||||756|Nos|protein_coding|CODING|FBtr0100489|8|1);INTRON(MODIFIER||||1098|Nos|protein_coding|CODING|FBtr0343888|6|1)]	Body Weight	0.14717	0.3713	0.457765
Body Weight	1-(1-enyl-stearoyl)-GPE (P-18:0)*	39271	-0.39024	0.0128	FBgn0036727	3L:17463227-17467617	-0.54858	0.0003	2L_10945400_SNP	0.375	4.49342e-06	0.003336	0.00555556	SiteClass[FBgn0261871|dpr2|INTRON|0],TranscriptAnnot[INTRON(MODIFIER||||410|dpr2|protein_coding|CODING|FBtr0340553|2|1);INTRON(MODIFIER||||410|dpr2|protein_coding|CODING|FBtr0340554|2|1)]	Body Weight	-0.07814	0.6363	0.191436
Body Weight	1-(1-enyl-stearoyl)-GPE (P-18:0)*	39271	-0.39024	0.0128	FBgn0036942	3L:20132310-20133707	-0.46134	0.0031	2L_10945400_SNP	0.375	4.49342e-06	0.002133	0.00555556	SiteClass[FBgn0261871|dpr2|INTRON|0],TranscriptAnnot[INTRON(MODIFIER||||410|dpr2|protein_coding|CODING|FBtr0340553|2|1);INTRON(MODIFIER||||410|dpr2|protein_coding|CODING|FBtr0340554|2|1)]	Body Weight	0.06215	0.707	0.191436
Body Weight	1-(1-enyl-stearoyl)-GPE (P-18:0)*	39271	-0.39024	0.0128	FBgn0261805	2L:11853430-11853925	0.49251	0.0014	2L_10945400_SNP	0.375	4.49342e-06	0.005376	0.00555556	SiteClass[FBgn0261871|dpr2|INTRON|0],TranscriptAnnot[INTRON(MODIFIER||||410|dpr2|protein_coding|CODING|FBtr0340553|2|1);INTRON(MODIFIER||||410|dpr2|protein_coding|CODING|FBtr0340554|2|1)]	Body Weight	0.06893	0.6767	0.191436
Body Weight	1-(1-enyl-stearoyl)-GPE (P-18:0)*	39271	-0.39024	0.0128	FBgn0010038	3R:8197693-8198426	0.60081	<.0001	2L_10945400_SNP	0.375	4.49342e-06	0.002489	0.00555556	SiteClass[FBgn0261871|dpr2|INTRON|0],TranscriptAnnot[INTRON(MODIFIER||||410|dpr2|protein_coding|CODING|FBtr0340553|2|1);INTRON(MODIFIER||||410|dpr2|protein_coding|CODING|FBtr0340554|2|1)]	Body Weight	-0.21276	0.1935	0.191436
Body Weight	1-(1-enyl-stearoyl)-GPE (P-18:0)*	39271	-0.39024	0.0128	FBgn0261988	3R:27230967-27283595	0.45931	0.0033	2L_10945400_SNP	0.375	4.49342e-06	0.0008075	0.00555556	SiteClass[FBgn0261871|dpr2|INTRON|0],TranscriptAnnot[INTRON(MODIFIER||||410|dpr2|protein_coding|CODING|FBtr0340553|2|1);INTRON(MODIFIER||||410|dpr2|protein_coding|CODING|FBtr0340554|2|1)]	Body Weight	0.00283	0.9863	0.191436
Body Weight	1-(1-enyl-stearoyl)-GPE (P-18:0)*	39271	-0.39024	0.0128	XLOC_011937	2RHet:1087343-1089713	-0.65587	<.0001	2L_10945400_SNP	0.375	4.49342e-06	0.004413	0.00555556	SiteClass[FBgn0261871|dpr2|INTRON|0],TranscriptAnnot[INTRON(MODIFIER||||410|dpr2|protein_coding|CODING|FBtr0340553|2|1);INTRON(MODIFIER||||410|dpr2|protein_coding|CODING|FBtr0340554|2|1)]	Body Weight	-0.10744	0.515	0.191436
Body Weight	histamine	1574	-0.38248	0.0149	FBgn0034725	2R:18291682-18296045	-0.45832	0.0033	2L_12415975_SNP	0.1389	3.35053e-06	0.000962	0.00172414	SiteClass[FBgn0043841|vir-1|INTRON|0],TranscriptAnnot[INTRON(MODIFIER||||431|vir-1|protein_coding|CODING|FBtr0080389|2|1);INTRON(MODIFIER||||431|vir-1|protein_coding|CODING|FBtr0080390|1|1);INTRON(MODIFIER||||234|vir-1|protein_coding|CODING|FBtr0080391|1|1);INTRON(MODIFIER||||423|vir-1|protein_coding|CODING|FBtr0334761|2|1);INTRON(MODIFIER||||234|vir-1|protein_coding|CODING|FBtr0334762|2|1)]	Body Weight	-0.11387	0.49	0.196619
Body Weight	histamine	1574	-0.38248	0.0149	FBgn0031150	X:20924990-20953418	-0.50013	0.0012	2L_12415975_SNP	0.1389	3.35053e-06	0.0001426	0.00172414	SiteClass[FBgn0043841|vir-1|INTRON|0],TranscriptAnnot[INTRON(MODIFIER||||431|vir-1|protein_coding|CODING|FBtr0080389|2|1);INTRON(MODIFIER||||431|vir-1|protein_coding|CODING|FBtr0080390|1|1);INTRON(MODIFIER||||234|vir-1|protein_coding|CODING|FBtr0080391|1|1);INTRON(MODIFIER||||423|vir-1|protein_coding|CODING|FBtr0334761|2|1);INTRON(MODIFIER||||234|vir-1|protein_coding|CODING|FBtr0334762|2|1)]	Body Weight	0.14717	0.3713	0.196619
Body Weight	histamine	1574	-0.38248	0.0149	FBgn0034725	2R:18291682-18296045	-0.45832	0.0033	2L_12416002_SNP	0.1316	2.73171e-06	0.0004931	0.00172414	SiteClass[FBgn0043841|vir-1|INTRON|0],TranscriptAnnot[INTRON(MODIFIER||||431|vir-1|protein_coding|CODING|FBtr0080389|2|1);INTRON(MODIFIER||||431|vir-1|protein_coding|CODING|FBtr0080390|1|1);INTRON(MODIFIER||||234|vir-1|protein_coding|CODING|FBtr0080391|1|1);INTRON(MODIFIER||||423|vir-1|protein_coding|CODING|FBtr0334761|2|1);INTRON(MODIFIER||||234|vir-1|protein_coding|CODING|FBtr0334762|2|1)]	Body Weight	-0.11387	0.49	0.172874
Body Weight	histamine	1574	-0.38248	0.0149	FBgn0031150	X:20924990-20953418	-0.50013	0.0012	2L_12416002_SNP	0.1316	2.73171e-06	0.0001261	0.00172414	SiteClass[FBgn0043841|vir-1|INTRON|0],TranscriptAnnot[INTRON(MODIFIER||||431|vir-1|protein_coding|CODING|FBtr0080389|2|1);INTRON(MODIFIER||||431|vir-1|protein_coding|CODING|FBtr0080390|1|1);INTRON(MODIFIER||||234|vir-1|protein_coding|CODING|FBtr0080391|1|1);INTRON(MODIFIER||||423|vir-1|protein_coding|CODING|FBtr0334761|2|1);INTRON(MODIFIER||||234|vir-1|protein_coding|CODING|FBtr0334762|2|1)]	Body Weight	0.14717	0.3713	0.172874
Body Weight	histamine	1574	-0.38248	0.0149	FBgn0034725	2R:18291682-18296045	-0.45832	0.0033	2L_12416010_SNP	0.1538	5.88363e-06	0.001561	0.00172414	SiteClass[FBgn0043841|vir-1|INTRON|0],TranscriptAnnot[INTRON(MODIFIER||||431|vir-1|protein_coding|CODING|FBtr0080389|2|1);INTRON(MODIFIER||||431|vir-1|protein_coding|CODING|FBtr0080390|1|1);INTRON(MODIFIER||||234|vir-1|protein_coding|CODING|FBtr0080391|1|1);INTRON(MODIFIER||||423|vir-1|protein_coding|CODING|FBtr0334761|2|1);INTRON(MODIFIER||||234|vir-1|protein_coding|CODING|FBtr0334762|2|1)]	Body Weight	-0.11387	0.49	0.189077
Body Weight	histamine	1574	-0.38248	0.0149	FBgn0036266	3L:12197223-12199122	-0.45377	0.0037	2L_12416010_SNP	0.1538	5.88363e-06	0.001173	0.00172414	SiteClass[FBgn0043841|vir-1|INTRON|0],TranscriptAnnot[INTRON(MODIFIER||||431|vir-1|protein_coding|CODING|FBtr0080389|2|1);INTRON(MODIFIER||||431|vir-1|protein_coding|CODING|FBtr0080390|1|1);INTRON(MODIFIER||||234|vir-1|protein_coding|CODING|FBtr0080391|1|1);INTRON(MODIFIER||||423|vir-1|protein_coding|CODING|FBtr0334761|2|1);INTRON(MODIFIER||||234|vir-1|protein_coding|CODING|FBtr0334762|2|1)]	Body Weight	0.21469	0.1894	0.189077
Body Weight	histamine	1574	-0.38248	0.0149	FBgn0031150	X:20924990-20953418	-0.50013	0.0012	2L_12416010_SNP	0.1538	5.88363e-06	0.0001334	0.00172414	SiteClass[FBgn0043841|vir-1|INTRON|0],TranscriptAnnot[INTRON(MODIFIER||||431|vir-1|protein_coding|CODING|FBtr0080389|2|1);INTRON(MODIFIER||||431|vir-1|protein_coding|CODING|FBtr0080390|1|1);INTRON(MODIFIER||||234|vir-1|protein_coding|CODING|FBtr0080391|1|1);INTRON(MODIFIER||||423|vir-1|protein_coding|CODING|FBtr0334761|2|1);INTRON(MODIFIER||||234|vir-1|protein_coding|CODING|FBtr0334762|2|1)]	Body Weight	0.14717	0.3713	0.189077
Body Weight	histamine	1574	-0.38248	0.0149	FBgn0039326	3R:21146775-21148479	-0.47634	0.0022	2L_13232959_SNP	0.1053	8.20372e-06	0.0004022	0.00172414	SiteClass[FBgn0032492|Prosalpha6T|SYNONYMOUS_CODING|0;FBgn0032493|CG15479|DOWNSTREAM|839],TranscriptAnnot[SYNONYMOUS_CODING(LOW|SILENT|ggC/ggT|G284|289|Prosalpha6T|protein_coding|CODING|FBtr0080448|1|1);DOWNSTREAM(MODIFIER||839||206|CG15479|protein_coding|CODING|FBtr0080481||1)]	Body Weight	0.06346	0.7011	0.0637656
Body Weight	1-palmitoyl-GPG (16:0)*	45970	-0.36529	0.0205	XLOC_028011	Uextra:3177610-3178493	0.5336	0.0005	2L_13240607_SNP	0.2051	6.48625e-06	0.00104	0.00166667	SiteClass[FBgn0032494|CG5945|SYNONYMOUS_CODING|0],TranscriptAnnot[SYNONYMOUS_CODING(LOW|SILENT|ctG/ctT|L117|250|CG5945|protein_coding|CODING|FBtr0334754|2|1);SYNONYMOUS_CODING(LOW|SILENT|ctG/ctT|L117|250|CG5945|protein_coding|CODING|FBtr0080450|2|1)]	Body Weight	-0.03614	0.8271	0.112214
Body Weight	1-palmitoyl-2-linoleoyl-GPI (16:0/18:2)	52450	-0.33283	0.0359	FBgn0020385	3R:6522256-6529038	0.48684	0.0017	2L_13597618_SNP	0.15	3.04909e-06	5.7e-06	0.000617284	SiteClass[FBgn0259984|kuz|INTRON|0;FBgn0028513|CG9254|UPSTREAM|432],TranscriptAnnot[UPSTREAM(MODIFIER||432||481|CG9254|protein_coding|CODING|FBtr0080512||1);INTRON(MODIFIER||||1238|kuz|protein_coding|CODING|FBtr0080509|3|1);INTRON(MODIFIER||||1238|kuz|protein_coding|CODING|FBtr0080510|3|1);INTRON(MODIFIER||||1090|kuz|protein_coding|CODING|FBtr0100660|3|1);INTRON(MODIFIER||||1219|kuz|protein_codin…	Body Weight	-0.1495	0.3637	0.304889
Body Weight	1-stearoyl-GPE (18:0)	42398	-0.38049	0.0154	FBgn0261563	2L:14263027-14328262	-0.46457	0.0029	2L_1424920_SNP	0.125	5.93174e-06	0.0005888	0.000943396	SiteClass[|||],TranscriptAnnot[INTERGENIC(MODIFIER||||||||||1)]	Body Weight	0.17126	0.2972	0.179921
Body Weight	1,2-dipalmitoyl-GPC (16:0/16:0)	19130	-0.33133	0.0368	FBgn0002719	3R:8538825-8548164	0.48543	0.0017	2L_14273402_INS	0.1579	2.68067e-06	0.002489	0.00357143	SiteClass[FBgn0261563|wb|INTRON|0;FBgn0265942|CR44729|DOWNSTREAM|318],TranscriptAnnot[DOWNSTREAM(MODIFIER||318|||CR44729|ncRNA|NON_CODING|FBtr0342909||1);INTRON(MODIFIER||||3375|wb|protein_coding|CODING|FBtr0302731|1|1);INTRON(MODIFIER||||3001|wb|protein_coding|CODING|FBtr0305063|1|1)]	Body Weight	-0.11104	0.501	0.324775
Body Weight	1,2-dipalmitoyl-GPC (16:0/16:0)	19130	-0.33133	0.0368	XLOC_018870	3L:23605963-23612500	0.46154	0.0031	2L_14273402_INS	0.1579	2.68067e-06	0.002135	0.00357143	SiteClass[FBgn0261563|wb|INTRON|0;FBgn0265942|CR44729|DOWNSTREAM|318],TranscriptAnnot[DOWNSTREAM(MODIFIER||318|||CR44729|ncRNA|NON_CODING|FBtr0342909||1);INTRON(MODIFIER||||3375|wb|protein_coding|CODING|FBtr0302731|1|1);INTRON(MODIFIER||||3001|wb|protein_coding|CODING|FBtr0305063|1|1)]	Body Weight	-0.29232	0.0709	0.324775
Body Weight	1-stearoyl-GPE (18:0)	42398	-0.38049	0.0154	FBgn0039883	3R:27638331-27672292	0.45587	0.0035	2L_14290464_SNP	0.1351	6.4905e-06	0.0007789	0.000943396	SiteClass[FBgn0261563|wb|INTRON|0;FBgn0263648|CR43639|UPSTREAM|737],TranscriptAnnot[UPSTREAM(MODIFIER||737|||CR43639|ncRNA|NON_CODING|FBtr0310011||1);UPSTREAM(MODIFIER||737|||CR43639|ncRNA|NON_CODING|FBtr0310012||1);INTRON(MODIFIER||||3375|wb|protein_coding|CODING|FBtr0302731|4|1);INTRON(MODIFIER||||3001|wb|protein_coding|CODING|FBtr0305063|4|1)]	Body Weight	-0.09687	0.5574	0.0331583
Body Weight	gamma-glutamylisoleucine*	34456	-0.34508	0.0292	FBgn0053098	3R:8212910-8214516	-0.47683	0.0021	2L_14361965_SNP	0.1282	9.82585e-06	0.0008171	0.000833333	SiteClass[FBgn0015546|spel1|UPSTREAM|104;FBgn0001970|Pgant35A|DOWNSTREAM|554;FBgn0266428|CR43463|UPSTREAM|662],TranscriptAnnot[UPSTREAM(MODIFIER||104||917|spel1|protein_coding|CODING|FBtr0080630||1);UPSTREAM(MODIFIER||104||917|spel1|protein_coding|CODING|FBtr0309281||1);UPSTREAM(MODIFIER||104||917|spel1|protein_coding|CODING|FBtr0344018||1);UPSTREAM(MODIFIER||104||917|spel1|protein_coding|CODING|…	Body Weight	0.20669	0.2068	0.0129144
Body Weight	gamma-glutamylisoleucine*	34456	-0.34508	0.0292	FBgn0040297	2L:21104568-21134255	-0.45619	0.0035	2L_14361965_SNP	0.1282	9.82585e-06	0.0005275	0.000833333	SiteClass[FBgn0015546|spel1|UPSTREAM|104;FBgn0001970|Pgant35A|DOWNSTREAM|554;FBgn0266428|CR43463|UPSTREAM|662],TranscriptAnnot[UPSTREAM(MODIFIER||104||917|spel1|protein_coding|CODING|FBtr0080630||1);UPSTREAM(MODIFIER||104||917|spel1|protein_coding|CODING|FBtr0309281||1);UPSTREAM(MODIFIER||104||917|spel1|protein_coding|CODING|FBtr0344018||1);UPSTREAM(MODIFIER||104||917|spel1|protein_coding|CODING|…	Body Weight	-0.07308	0.6584	0.0129144
Body Weight	gamma-glutamylisoleucine*	34456	-0.34508	0.0292	FBgn0036656	3L:16717778-16719269	-0.48699	0.0017	2L_14361965_SNP	0.1282	9.82585e-06	8.847e-05	0.000833333	SiteClass[FBgn0015546|spel1|UPSTREAM|104;FBgn0001970|Pgant35A|DOWNSTREAM|554;FBgn0266428|CR43463|UPSTREAM|662],TranscriptAnnot[UPSTREAM(MODIFIER||104||917|spel1|protein_coding|CODING|FBtr0080630||1);UPSTREAM(MODIFIER||104||917|spel1|protein_coding|CODING|FBtr0309281||1);UPSTREAM(MODIFIER||104||917|spel1|protein_coding|CODING|FBtr0344018||1);UPSTREAM(MODIFIER||104||917|spel1|protein_coding|CODING|…	Body Weight	0.0583	0.7244	0.0129144
Body Weight	gamma-glutamylisoleucine*	34456	-0.34508	0.0292	FBgn0053098	3R:8212910-8214516	-0.47683	0.0021	2L_14362008_SNP	0.125	8.01273e-06	0.0006737	0.000833333	SiteClass[FBgn0015546|spel1|UPSTREAM|61;FBgn0001970|Pgant35A|DOWNSTREAM|597;FBgn0266428|CR43463|UPSTREAM|705],TranscriptAnnot[UPSTREAM(MODIFIER||61||917|spel1|protein_coding|CODING|FBtr0080630||1);UPSTREAM(MODIFIER||61||917|spel1|protein_coding|CODING|FBtr0309281||1);UPSTREAM(MODIFIER||61||917|spel1|protein_coding|CODING|FBtr0344018||1);UPSTREAM(MODIFIER||61||917|spel1|protein_coding|CODING|FBtr0…	Body Weight	0.20669	0.2068	0.0124478
Body Weight	gamma-glutamylisoleucine*	34456	-0.34508	0.0292	FBgn0040297	2L:21104568-21134255	-0.45619	0.0035	2L_14362008_SNP	0.125	8.01273e-06	0.0004487	0.000833333	SiteClass[FBgn0015546|spel1|UPSTREAM|61;FBgn0001970|Pgant35A|DOWNSTREAM|597;FBgn0266428|CR43463|UPSTREAM|705],TranscriptAnnot[UPSTREAM(MODIFIER||61||917|spel1|protein_coding|CODING|FBtr0080630||1);UPSTREAM(MODIFIER||61||917|spel1|protein_coding|CODING|FBtr0309281||1);UPSTREAM(MODIFIER||61||917|spel1|protein_coding|CODING|FBtr0344018||1);UPSTREAM(MODIFIER||61||917|spel1|protein_coding|CODING|FBtr0…	Body Weight	-0.07308	0.6584	0.0124478
Body Weight	gamma-glutamylisoleucine*	34456	-0.34508	0.0292	FBgn0036656	3L:16717778-16719269	-0.48699	0.0017	2L_14362008_SNP	0.125	8.01273e-06	6.629e-05	0.000833333	SiteClass[FBgn0015546|spel1|UPSTREAM|61;FBgn0001970|Pgant35A|DOWNSTREAM|597;FBgn0266428|CR43463|UPSTREAM|705],TranscriptAnnot[UPSTREAM(MODIFIER||61||917|spel1|protein_coding|CODING|FBtr0080630||1);UPSTREAM(MODIFIER||61||917|spel1|protein_coding|CODING|FBtr0309281||1);UPSTREAM(MODIFIER||61||917|spel1|protein_coding|CODING|FBtr0344018||1);UPSTREAM(MODIFIER||61||917|spel1|protein_coding|CODING|FBtr0…	Body Weight	0.0583	0.7244	0.0124478
Body Weight	gamma-glutamylmethionine	44872	-0.35053	0.0266	FBgn0039487	3R:22934189-22937992	-0.45275	0.0038	2L_14530503_SNP	0.1053	1.24037e-07	0.002508	0.00333333	SiteClass[FBgn0011865|tRNA:G3:35Bd|DOWNSTREAM|43;FBgn0011866|tRNA:G3:35Be|DOWNSTREAM|351],TranscriptAnnot[DOWNSTREAM(MODIFIER||43|||tRNA:G3:35Bd|tRNA|NON_CODING|FBtr0080664||1);DOWNSTREAM(MODIFIER||351|||tRNA:G3:35Be|tRNA|NON_CODING|FBtr0080663||1);INTERGENIC(MODIFIER||||||||||1)]	Body Weight	-0.10669	0.518	0.261174
Body Weight	gamma-glutamylglutamine	2730	-0.33884	0.0325	FBgn0035313	3L:2185930-2187676	-0.45789	0.0034	2L_14530503_SNP	0.1053	3.43518e-07	0.000264	0.00357143	SiteClass[FBgn0011865|tRNA:G3:35Bd|DOWNSTREAM|43;FBgn0011866|tRNA:G3:35Be|DOWNSTREAM|351],TranscriptAnnot[DOWNSTREAM(MODIFIER||43|||tRNA:G3:35Bd|tRNA|NON_CODING|FBtr0080664||1);DOWNSTREAM(MODIFIER||351|||tRNA:G3:35Be|tRNA|NON_CODING|FBtr0080663||1);INTERGENIC(MODIFIER||||||||||1)]	Body Weight	0.12055	0.4648	0.261174
Body Weight	gamma-glutamylglutamine	2730	-0.33884	0.0325	FBgn0036787	3L:18455057-18456263	-0.7166	<.0001	2L_14530503_SNP	0.1053	3.43518e-07	0.001445	0.00357143	SiteClass[FBgn0011865|tRNA:G3:35Bd|DOWNSTREAM|43;FBgn0011866|tRNA:G3:35Be|DOWNSTREAM|351],TranscriptAnnot[DOWNSTREAM(MODIFIER||43|||tRNA:G3:35Bd|tRNA|NON_CODING|FBtr0080664||1);DOWNSTREAM(MODIFIER||351|||tRNA:G3:35Be|tRNA|NON_CODING|FBtr0080663||1);INTERGENIC(MODIFIER||||||||||1)]	Body Weight	0.1909	0.2444	0.261174
Body Weight	gamma-glutamylmethionine	44872	-0.35053	0.0266	FBgn0039487	3R:22934189-22937992	-0.45275	0.0038	2L_14531170_SNP	0.1026	1.1796e-07	0.00221	0.00333333	SiteClass[FBgn0011866|tRNA:G3:35Be|UPSTREAM|246;FBgn0011865|tRNA:G3:35Bd|UPSTREAM|554],TranscriptAnnot[UPSTREAM(MODIFIER||554|||tRNA:G3:35Bd|tRNA|NON_CODING|FBtr0080664||1);UPSTREAM(MODIFIER||246|||tRNA:G3:35Be|tRNA|NON_CODING|FBtr0080663||1);INTERGENIC(MODIFIER||||||||||1)]	Body Weight	-0.10669	0.518	0.255938
Body Weight	gamma-glutamylglutamine	2730	-0.33884	0.0325	FBgn0035313	3L:2185930-2187676	-0.45789	0.0034	2L_14531170_SNP	0.1026	3.60763e-07	0.0002291	0.00357143	SiteClass[FBgn0011866|tRNA:G3:35Be|UPSTREAM|246;FBgn0011865|tRNA:G3:35Bd|UPSTREAM|554],TranscriptAnnot[UPSTREAM(MODIFIER||554|||tRNA:G3:35Bd|tRNA|NON_CODING|FBtr0080664||1);UPSTREAM(MODIFIER||246|||tRNA:G3:35Be|tRNA|NON_CODING|FBtr0080663||1);INTERGENIC(MODIFIER||||||||||1)]	Body Weight	0.12055	0.4648	0.255938
Body Weight	gamma-glutamylmethionine	44872	-0.35053	0.0266	FBgn0036787	3L:18455057-18456263	-0.71801	<.0001	2L_14531170_SNP	0.1026	1.1796e-07	0.00122	0.00333333	SiteClass[FBgn0011866|tRNA:G3:35Be|UPSTREAM|246;FBgn0011865|tRNA:G3:35Bd|UPSTREAM|554],TranscriptAnnot[UPSTREAM(MODIFIER||554|||tRNA:G3:35Bd|tRNA|NON_CODING|FBtr0080664||1);UPSTREAM(MODIFIER||246|||tRNA:G3:35Be|tRNA|NON_CODING|FBtr0080663||1);INTERGENIC(MODIFIER||||||||||1)]	Body Weight	0.1909	0.2444	0.255938
Body Weight	gamma-glutamylglutamine	2730	-0.33884	0.0325	FBgn0036787	3L:18455057-18456263	-0.7166	<.0001	2L_14531170_SNP	0.1026	3.60763e-07	0.00122	0.00357143	SiteClass[FBgn0011866|tRNA:G3:35Be|UPSTREAM|246;FBgn0011865|tRNA:G3:35Bd|UPSTREAM|554],TranscriptAnnot[UPSTREAM(MODIFIER||554|||tRNA:G3:35Bd|tRNA|NON_CODING|FBtr0080664||1);UPSTREAM(MODIFIER||246|||tRNA:G3:35Be|tRNA|NON_CODING|FBtr0080663||1);INTERGENIC(MODIFIER||||||||||1)]	Body Weight	0.1909	0.2444	0.255938
Body Weight	gamma-glutamylglutamine	2730	-0.33884	0.0325	FBgn0031935	2L:7716974-7719487	-0.49271	0.0014	2L_14546700_SNP	0.1026	9.61189e-07	0.0001404	0.00357143	SiteClass[FBgn0250844|CG4218|DOWNSTREAM|798],TranscriptAnnot[DOWNSTREAM(MODIFIER||798||281|CG4218|protein_coding|CODING|FBtr0343704||1);DOWNSTREAM(MODIFIER||829||281|CG4218|protein_coding|CODING|FBtr0080662||1);DOWNSTREAM(MODIFIER||829||235|CG4218|protein_coding|CODING|FBtr0344772||1);INTERGENIC(MODIFIER||||||||||1)]	Body Weight	0.23523	0.1494	0.207583
Body Weight	gamma-glutamylmethionine	44872	-0.35053	0.0266	FBgn0039487	3R:22934189-22937992	-0.45275	0.0038	2L_14546700_SNP	0.1026	3.62676e-08	0.0001847	0.00333333	SiteClass[FBgn0250844|CG4218|DOWNSTREAM|798],TranscriptAnnot[DOWNSTREAM(MODIFIER||798||281|CG4218|protein_coding|CODING|FBtr0343704||1);DOWNSTREAM(MODIFIER||829||281|CG4218|protein_coding|CODING|FBtr0080662||1);DOWNSTREAM(MODIFIER||829||235|CG4218|protein_coding|CODING|FBtr0344772||1);INTERGENIC(MODIFIER||||||||||1)]	Body Weight	-0.10669	0.518	0.207583
Body Weight	gamma-glutamylmethionine	44872	-0.35053	0.0266	FBgn0036787	3L:18455057-18456263	-0.71801	<.0001	2L_14546700_SNP	0.1026	3.62676e-08	0.001445	0.00333333	SiteClass[FBgn0250844|CG4218|DOWNSTREAM|798],TranscriptAnnot[DOWNSTREAM(MODIFIER||798||281|CG4218|protein_coding|CODING|FBtr0343704||1);DOWNSTREAM(MODIFIER||829||281|CG4218|protein_coding|CODING|FBtr0080662||1);DOWNSTREAM(MODIFIER||829||235|CG4218|protein_coding|CODING|FBtr0344772||1);INTERGENIC(MODIFIER||||||||||1)]	Body Weight	0.1909	0.2444	0.207583
Body Weight	gamma-glutamylmethionine	44872	-0.35053	0.0266	FBgn0036787	3L:18455057-18456263	-0.71801	<.0001	2L_14548071_SNP	0.1026	1.18037e-07	0.0002925	0.00333333	SiteClass[FBgn0250844|CG4218|DOWNSTREAM|344],TranscriptAnnot[NON_SYNONYMOUS_CODING(MODERATE|MISSENSE|Cgt/Agt|R163S|281|CG4218|protein_coding|CODING|FBtr0343704|2|1);NON_SYNONYMOUS_CODING(MODERATE|MISSENSE|Cgt/Agt|R163S|281|CG4218|protein_coding|CODING|FBtr0080662|2|1);NON_SYNONYMOUS_CODING(MODERATE|MISSENSE|Cgt/Agt|R163S|235|CG4218|protein_coding|CODING|FBtr0344772|2|1);DOWNSTREAM(MODIFIER||344||…	Body Weight	0.1909	0.2444	0.298442
Body Weight	gamma-glutamylmethionine	44872	-0.35053	0.0266	FBgn0039487	3R:22934189-22937992	-0.45275	0.0038	2L_14548071_SNP	0.1026	1.18037e-07	0.0002593	0.00333333	SiteClass[FBgn0250844|CG4218|DOWNSTREAM|344],TranscriptAnnot[NON_SYNONYMOUS_CODING(MODERATE|MISSENSE|Cgt/Agt|R163S|281|CG4218|protein_coding|CODING|FBtr0343704|2|1);NON_SYNONYMOUS_CODING(MODERATE|MISSENSE|Cgt/Agt|R163S|281|CG4218|protein_coding|CODING|FBtr0080662|2|1);NON_SYNONYMOUS_CODING(MODERATE|MISSENSE|Cgt/Agt|R163S|235|CG4218|protein_coding|CODING|FBtr0344772|2|1);DOWNSTREAM(MODIFIER||344||…	Body Weight	-0.10669	0.518	0.298442
Body Weight	1-(1-enyl-stearoyl)-GPE (P-18:0)*	39271	-0.39024	0.0128	XLOC_011937	2RHet:1087343-1089713	-0.65587	<.0001	2L_14552997_SNP	0.3889	6.04504e-06	0.003802	0.00555556	SiteClass[|||],TranscriptAnnot[INTERGENIC(MODIFIER||||||||||1)]	Body Weight	-0.10744	0.515	0.922705
Body Weight	1-(1-enyl-stearoyl)-GPE (P-18:0)*	39271	-0.39024	0.0128	FBgn0040251	3R:6976748-6979571	-0.50243	0.0011	2L_14552997_SNP	0.3889	6.04504e-06	0.004991	0.00555556	SiteClass[|||],TranscriptAnnot[INTERGENIC(MODIFIER||||||||||1)]	Body Weight	0.28453	0.0792	0.922705
Body Weight	gamma-glutamylisoleucine*	34456	-0.34508	0.0292	FBgn0263482	2R:6424455-6424625	-0.60165	<.0001	2L_1467482_SNP	0.1026	3.54658e-06	0.0001297	0.000833333	SiteClass[|||],TranscriptAnnot[INTERGENIC(MODIFIER||||||||||1)]	Body Weight	0.13148	0.4249	0.544032
Body Weight	gamma-glutamylmethionine	44872	-0.35053	0.0266	FBgn0036787	3L:18455057-18456263	-0.71801	<.0001	2L_15175331_SNP	0.1081	1.02267e-07	0.00205	0.00333333	SiteClass[FBgn0028888|CG4168|INTRON|0],TranscriptAnnot[INTRON(MODIFIER||||1330|CG4168|protein_coding|CODING|FBtr0305559|2|1);INTRON(MODIFIER||||1330|CG4168|protein_coding|CODING|FBtr0343105|2|1)]	Body Weight	0.1909	0.2444	0.778419
Body Weight	1-stearoyl-GPE (18:0)	42398	-0.38049	0.0154	FBgn0051547	3R:1315227-1328424	0.483	0.0018	2L_15348643_SNP	0.1429	4.98735e-06	0.0006066	0.000943396	SiteClass[|||],TranscriptAnnot[INTERGENIC(MODIFIER||||||||||1)]	Body Weight	-0.18766	0.2526	0.161412
Body Weight	1-stearoyl-GPE (18:0)	42398	-0.38049	0.0154	FBgn0028579	2R:2629404-2633646	0.45607	0.0035	2L_15348643_SNP	0.1429	4.98735e-06	0.0006666	0.000943396	SiteClass[|||],TranscriptAnnot[INTERGENIC(MODIFIER||||||||||1)]	Body Weight	0.1161	0.4815	0.161412
Body Weight	1-stearoyl-GPE (18:0)	42398	-0.38049	0.0154	FBgn0261563	2L:14263027-14328262	-0.46457	0.0029	2L_15348643_SNP	0.1429	4.98735e-06	0.0004571	0.000943396	SiteClass[|||],TranscriptAnnot[INTERGENIC(MODIFIER||||||||||1)]	Body Weight	0.17126	0.2972	0.161412
Body Weight	histamine	1574	-0.38248	0.0149	XLOC_017830	3L:15931447-15935182	0.49162	0.0015	2L_15411894_SNP	0.1053	8.98732e-06	0.001539	0.00172414	SiteClass[|||],TranscriptAnnot[INTERGENIC(MODIFIER||||||||||1)]	Body Weight	-0.05071	0.7592	0.118669
Body Weight	histamine	1574	-0.38248	0.0149	FBgn0039326	3R:21146775-21148479	-0.47634	0.0022	2L_15411894_SNP	0.1053	8.98732e-06	0.0003745	0.00172414	SiteClass[|||],TranscriptAnnot[INTERGENIC(MODIFIER||||||||||1)]	Body Weight	0.06346	0.7011	0.118669
Body Weight	histamine	1574	-0.38248	0.0149	FBgn0034725	2R:18291682-18296045	-0.45832	0.0033	2L_15411894_SNP	0.1053	8.98732e-06	0.001196	0.00172414	SiteClass[|||],TranscriptAnnot[INTERGENIC(MODIFIER||||||||||1)]	Body Weight	-0.11387	0.49	0.118669
Body Weight	histamine	1574	-0.38248	0.0149	FBgn0029710	X:4436663-4438530	-0.51116	0.0009	2L_15411894_SNP	0.1053	8.98732e-06	0.00041	0.00172414	SiteClass[|||],TranscriptAnnot[INTERGENIC(MODIFIER||||||||||1)]	Body Weight	-0.03178	0.8477	0.118669
Body Weight	2-stearoyl-GPE (18:0)*	41220	-0.40131	0.0103	FBgn0038450	3R:12443672-12445600	-0.50547	0.001	2L_1710793_SNP	0.2	9.71858e-06	0.0001826	0.00108696	SiteClass[FBgn0031357|mRpL48|INTRON|0;FBgn0031356|CG17660|UPSTREAM|372;FBgn0086698|frtz|DOWNSTREAM|509],TranscriptAnnot[UPSTREAM(MODIFIER||372||536|CG17660|protein_coding|CODING|FBtr0077912||1);DOWNSTREAM(MODIFIER||509||951|frtz|protein_coding|CODING|FBtr0077911||1);DOWNSTREAM(MODIFIER||509||946|frtz|protein_coding|CODING|FBtr0333545||1);DOWNSTREAM(MODIFIER||807||951|frtz|protein_coding|CODING|FB…	Body Weight	0.26874	0.0981	0.049886
Body Weight	2-stearoyl-GPE (18:0)*	41220	-0.40131	0.0103	FBgn0260475	2R:9300274-9302125	-0.51113	0.0009	2L_1710793_SNP	0.2	9.71858e-06	0.0004555	0.00108696	SiteClass[FBgn0031357|mRpL48|INTRON|0;FBgn0031356|CG17660|UPSTREAM|372;FBgn0086698|frtz|DOWNSTREAM|509],TranscriptAnnot[UPSTREAM(MODIFIER||372||536|CG17660|protein_coding|CODING|FBtr0077912||1);DOWNSTREAM(MODIFIER||509||951|frtz|protein_coding|CODING|FBtr0077911||1);DOWNSTREAM(MODIFIER||509||946|frtz|protein_coding|CODING|FBtr0333545||1);DOWNSTREAM(MODIFIER||807||951|frtz|protein_coding|CODING|FB…	Body Weight	0.01464	0.9295	0.049886
Body Weight	gamma-glutamylmethionine	44872	-0.35053	0.0266	FBgn0004387	3R:23373497-23384867	0.48534	0.0017	2L_3999878_SNP	0.1026	1.39679e-08	0.0004471	0.00333333	SiteClass[FBgn0264341|CG43797|UPSTREAM|140],TranscriptAnnot[UPSTREAM(MODIFIER||140||232|CG43797|protein_coding|CODING|FBtr0332007||1);INTERGENIC(MODIFIER||||||||||1)]	Body Weight	-0.13746	0.404	0.245791
Body Weight	gamma-glutamylmethionine	44872	-0.35053	0.0266	FBgn0036787	3L:18455057-18456263	-0.71801	<.0001	2L_3999878_SNP	0.1026	1.39679e-08	0.0006441	0.00333333	SiteClass[FBgn0264341|CG43797|UPSTREAM|140],TranscriptAnnot[UPSTREAM(MODIFIER||140||232|CG43797|protein_coding|CODING|FBtr0332007||1);INTERGENIC(MODIFIER||||||||||1)]	Body Weight	0.1909	0.2444	0.245791
Body Weight	gamma-glutamylmethionine	44872	-0.35053	0.0266	FBgn0039487	3R:22934189-22937992	-0.45275	0.0038	2L_3999878_SNP	0.1026	1.39679e-08	0.0001486	0.00333333	SiteClass[FBgn0264341|CG43797|UPSTREAM|140],TranscriptAnnot[UPSTREAM(MODIFIER||140||232|CG43797|protein_coding|CODING|FBtr0332007||1);INTERGENIC(MODIFIER||||||||||1)]	Body Weight	-0.10669	0.518	0.245791
Body Weight	gamma-glutamylglutamine	2730	-0.33884	0.0325	FBgn0036787	3L:18455057-18456263	-0.7166	<.0001	2L_4081661_SNP	0.1026	1.19699e-07	0.0003759	0.00357143	SiteClass[FBgn0000547|ed|INTRON|0],TranscriptAnnot[INTRON(MODIFIER||||1332|ed|protein_coding|CODING|FBtr0077465|5|1);INTRON(MODIFIER||||1332|ed|protein_coding|CODING|FBtr0334265|5|1);INTRON(MODIFIER||||1281|ed|protein_coding|CODING|FBtr0334266|5|1)]	Body Weight	0.1909	0.2444	0.163056
Body Weight	gamma-glutamylglutamine	2730	-0.33884	0.0325	FBgn0001978	2L:15113480-15118069	0.49514	0.0014	2L_4081661_SNP	0.1026	1.19699e-07	0.002293	0.00357143	SiteClass[FBgn0000547|ed|INTRON|0],TranscriptAnnot[INTRON(MODIFIER||||1332|ed|protein_coding|CODING|FBtr0077465|5|1);INTRON(MODIFIER||||1332|ed|protein_coding|CODING|FBtr0334265|5|1);INTRON(MODIFIER||||1281|ed|protein_coding|CODING|FBtr0334266|5|1)]	Body Weight	-0.03978	0.81	0.163056
Body Weight	gamma-glutamylglutamine	2730	-0.33884	0.0325	XLOC_006253	2LHet:25786-29448	-0.46862	0.0026	2L_4081661_SNP	0.1026	1.19699e-07	0.001876	0.00357143	SiteClass[FBgn0000547|ed|INTRON|0],TranscriptAnnot[INTRON(MODIFIER||||1332|ed|protein_coding|CODING|FBtr0077465|5|1);INTRON(MODIFIER||||1332|ed|protein_coding|CODING|FBtr0334265|5|1);INTRON(MODIFIER||||1281|ed|protein_coding|CODING|FBtr0334266|5|1)]	Body Weight	0.21944	0.1795	0.163056
Body Weight	gamma-glutamylmethionine	44872	-0.35053	0.0266	FBgn0001978	2L:15113480-15118069	0.49772	0.0013	2L_4081661_SNP	0.1026	2.00566e-08	0.002293	0.00333333	SiteClass[FBgn0000547|ed|INTRON|0],TranscriptAnnot[INTRON(MODIFIER||||1332|ed|protein_coding|CODING|FBtr0077465|5|1);INTRON(MODIFIER||||1332|ed|protein_coding|CODING|FBtr0334265|5|1);INTRON(MODIFIER||||1281|ed|protein_coding|CODING|FBtr0334266|5|1)]	Body Weight	-0.03978	0.81	0.163056
Body Weight	gamma-glutamylglutamine	2730	-0.33884	0.0325	FBgn0004387	3R:23373497-23384867	0.49514	0.0014	2L_4081661_SNP	0.1026	1.19699e-07	0.0008241	0.00357143	SiteClass[FBgn0000547|ed|INTRON|0],TranscriptAnnot[INTRON(MODIFIER||||1332|ed|protein_coding|CODING|FBtr0077465|5|1);INTRON(MODIFIER||||1332|ed|protein_coding|CODING|FBtr0334265|5|1);INTRON(MODIFIER||||1281|ed|protein_coding|CODING|FBtr0334266|5|1)]	Body Weight	-0.13746	0.404	0.163056
Body Weight	gamma-glutamylmethionine	44872	-0.35053	0.0266	FBgn0036787	3L:18455057-18456263	-0.71801	<.0001	2L_4081661_SNP	0.1026	2.00566e-08	0.0003759	0.00333333	SiteClass[FBgn0000547|ed|INTRON|0],TranscriptAnnot[INTRON(MODIFIER||||1332|ed|protein_coding|CODING|FBtr0077465|5|1);INTRON(MODIFIER||||1332|ed|protein_coding|CODING|FBtr0334265|5|1);INTRON(MODIFIER||||1281|ed|protein_coding|CODING|FBtr0334266|5|1)]	Body Weight	0.1909	0.2444	0.163056
Body Weight	gamma-glutamylmethionine	44872	-0.35053	0.0266	XLOC_006253	2LHet:25786-29448	-0.4773	0.0021	2L_4081661_SNP	0.1026	2.00566e-08	0.001876	0.00333333	SiteClass[FBgn0000547|ed|INTRON|0],TranscriptAnnot[INTRON(MODIFIER||||1332|ed|protein_coding|CODING|FBtr0077465|5|1);INTRON(MODIFIER||||1332|ed|protein_coding|CODING|FBtr0334265|5|1);INTRON(MODIFIER||||1281|ed|protein_coding|CODING|FBtr0334266|5|1)]	Body Weight	0.21944	0.1795	0.163056
Body Weight	gamma-glutamylmethionine	44872	-0.35053	0.0266	FBgn0004387	3R:23373497-23384867	0.48534	0.0017	2L_4081661_SNP	0.1026	2.00566e-08	0.0008241	0.00333333	SiteClass[FBgn0000547|ed|INTRON|0],TranscriptAnnot[INTRON(MODIFIER||||1332|ed|protein_coding|CODING|FBtr0077465|5|1);INTRON(MODIFIER||||1332|ed|protein_coding|CODING|FBtr0334265|5|1);INTRON(MODIFIER||||1281|ed|protein_coding|CODING|FBtr0334266|5|1)]	Body Weight	-0.13746	0.404	0.163056
Body Weight	N-acetyl-glucosamine 1-phosphate	15741	-0.36154	0.0219	FBgn0039312	3R:21104149-21105568	-0.56761	0.0002	2L_4137945_SNP	0.125	7.01661e-06	0.0003112	0.00138889	SiteClass[|||],TranscriptAnnot[INTERGENIC(MODIFIER||||||||||1)]	Body Weight	-0.16985	0.3013	0.449077
Body Weight	N-acetyl-glucosamine 1-phosphate	15741	-0.36154	0.0219	FBgn0052380	3L:7367150-7374574	0.55283	0.0003	2L_4137945_SNP	0.125	7.01661e-06	0.001263	0.00138889	SiteClass[|||],TranscriptAnnot[INTERGENIC(MODIFIER||||||||||1)]	Body Weight	0.0418	0.8005	0.449077
Body Weight	N-acetyl-glucosamine 1-phosphate	15741	-0.36154	0.0219	XLOC_019523	3LHet:2220773-2223122	-0.46235	0.003	2L_4137945_SNP	0.125	7.01661e-06	0.000259	0.00138889	SiteClass[|||],TranscriptAnnot[INTERGENIC(MODIFIER||||||||||1)]	Body Weight	0.07217	0.6624	0.449077
Body Weight	1-palmitoyl-GPG (16:0)*	45970	-0.36529	0.0205	XLOC_015512	3L:23992514-23993799	-0.57874	0.0001	2L_4207185_SNP	0.475	7.40535e-06	0.0007376	0.00166667	SiteClass[FBgn0001075|ft|SYNONYMOUS_CODING|0],TranscriptAnnot[SYNONYMOUS_CODING(LOW|SILENT|ttA/ttG|L2504|5147|ft|protein_coding|CODING|FBtr0077478|7|1)]	Body Weight	0.12098	0.4632	0.0383303
Body Weight	histamine	1574	-0.38248	0.0149	XLOC_017830	3L:15931447-15935182	0.49162	0.0015	2L_4268103_SNP	0.1282	3.81848e-06	0.001691	0.00172414	SiteClass[|||],TranscriptAnnot[INTERGENIC(MODIFIER||||||||||1)]	Body Weight	-0.05071	0.7592	0.805318
Body Weight	histamine	1574	-0.38248	0.0149	FBgn0031150	X:20924990-20953418	-0.50013	0.0012	2L_4268103_SNP	0.1282	3.81848e-06	0.00167	0.00172414	SiteClass[|||],TranscriptAnnot[INTERGENIC(MODIFIER||||||||||1)]	Body Weight	0.14717	0.3713	0.805318
Body Weight	histamine	1574	-0.38248	0.0149	FBgn0039326	3R:21146775-21148479	-0.47634	0.0022	2L_4268103_SNP	0.1282	3.81848e-06	0.00155	0.00172414	SiteClass[|||],TranscriptAnnot[INTERGENIC(MODIFIER||||||||||1)]	Body Weight	0.06346	0.7011	0.805318
Body Weight	histamine	1574	-0.38248	0.0149	FBgn0039326	3R:21146775-21148479	-0.47634	0.0022	2L_4268105_SNP	0.125	6.70411e-06	0.001297	0.00172414	SiteClass[|||],TranscriptAnnot[INTERGENIC(MODIFIER||||||||||1)]	Body Weight	0.06346	0.7011	0.892974
Body Weight	histamine	1574	-0.38248	0.0149	XLOC_017830	3L:15931447-15935182	0.49162	0.0015	2L_4268105_SNP	0.125	6.70411e-06	0.001367	0.00172414	SiteClass[|||],TranscriptAnnot[INTERGENIC(MODIFIER||||||||||1)]	Body Weight	-0.05071	0.7592	0.892974
Body Weight	histamine	1574	-0.38248	0.0149	FBgn0034725	2R:18291682-18296045	-0.45832	0.0033	2L_718033_SNP	0.15	7.66694e-06	4.732e-05	0.00172414	SiteClass[|||],TranscriptAnnot[INTERGENIC(MODIFIER||||||||||1)]	Body Weight	-0.11387	0.49	0.0157573
Body Weight	histamine	1574	-0.38248	0.0149	XLOC_017830	3L:15931447-15935182	0.49162	0.0015	2L_718033_SNP	0.15	7.66694e-06	0.001376	0.00172414	SiteClass[|||],TranscriptAnnot[INTERGENIC(MODIFIER||||||||||1)]	Body Weight	-0.05071	0.7592	0.0157573
Body Weight	gamma-glutamylisoleucine*	34456	-0.34508	0.0292	FBgn0263466	2R:6424000-6424165	-0.50915	0.0009	2L_7225299_SNP	0.1143	7.88101e-06	7e-05	0.000833333	SiteClass[FBgn0259111|Ndae1|DOWNSTREAM|839],TranscriptAnnot[DOWNSTREAM(MODIFIER||839||1086|Ndae1|protein_coding|CODING|FBtr0331659||1);DOWNSTREAM(MODIFIER||839||1053|Ndae1|protein_coding|CODING|FBtr0331662||1);INTRON(MODIFIER||||1134|Ndae1|protein_coding|CODING|FBtr0331658|10|1);INTRON(MODIFIER||||1046|Ndae1|protein_coding|CODING|FBtr0331664|9|1);INTRON(MODIFIER||||1190|Ndae1|protein_coding|CODIN…	Body Weight	0.09171	0.5787	0.522422
Body Weight	gamma-glutamylisoleucine*	34456	-0.34508	0.0292	FBgn0030629	X:15234406-15236150	-0.47988	0.002	2L_7225299_SNP	0.1143	7.88101e-06	4.66e-05	0.000833333	SiteClass[FBgn0259111|Ndae1|DOWNSTREAM|839],TranscriptAnnot[DOWNSTREAM(MODIFIER||839||1086|Ndae1|protein_coding|CODING|FBtr0331659||1);DOWNSTREAM(MODIFIER||839||1053|Ndae1|protein_coding|CODING|FBtr0331662||1);INTRON(MODIFIER||||1134|Ndae1|protein_coding|CODING|FBtr0331658|10|1);INTRON(MODIFIER||||1046|Ndae1|protein_coding|CODING|FBtr0331664|9|1);INTRON(MODIFIER||||1190|Ndae1|protein_coding|CODIN…	Body Weight	-0.24768	0.1284	0.522422
Body Weight	gamma-glutamylisoleucine*	34456	-0.34508	0.0292	FBgn0038589	3R:14076837-14077261	-0.49665	0.0013	2L_7225299_SNP	0.1143	7.88101e-06	0.0001602	0.000833333	SiteClass[FBgn0259111|Ndae1|DOWNSTREAM|839],TranscriptAnnot[DOWNSTREAM(MODIFIER||839||1086|Ndae1|protein_coding|CODING|FBtr0331659||1);DOWNSTREAM(MODIFIER||839||1053|Ndae1|protein_coding|CODING|FBtr0331662||1);INTRON(MODIFIER||||1134|Ndae1|protein_coding|CODING|FBtr0331658|10|1);INTRON(MODIFIER||||1046|Ndae1|protein_coding|CODING|FBtr0331664|9|1);INTRON(MODIFIER||||1190|Ndae1|protein_coding|CODIN…	Body Weight	-0.00304	0.9854	0.522422
Body Weight	gamma-glutamylisoleucine*	34456	-0.34508	0.0292	FBgn0263482	2R:6424455-6424625	-0.60165	<.0001	2L_7225299_SNP	0.1143	7.88101e-06	1.788e-05	0.000833333	SiteClass[FBgn0259111|Ndae1|DOWNSTREAM|839],TranscriptAnnot[DOWNSTREAM(MODIFIER||839||1086|Ndae1|protein_coding|CODING|FBtr0331659||1);DOWNSTREAM(MODIFIER||839||1053|Ndae1|protein_coding|CODING|FBtr0331662||1);INTRON(MODIFIER||||1134|Ndae1|protein_coding|CODING|FBtr0331658|10|1);INTRON(MODIFIER||||1046|Ndae1|protein_coding|CODING|FBtr0331664|9|1);INTRON(MODIFIER||||1190|Ndae1|protein_coding|CODIN…	Body Weight	0.13148	0.4249	0.522422
Body Weight	gamma-glutamylisoleucine*	34456	-0.34508	0.0292	FBgn0038589	3R:14076837-14077261	-0.49665	0.0013	2L_7225322_SNP	0.1111	5.49599e-06	0.0001606	0.000833333	SiteClass[FBgn0259111|Ndae1|DOWNSTREAM|816],TranscriptAnnot[DOWNSTREAM(MODIFIER||816||1086|Ndae1|protein_coding|CODING|FBtr0331659||1);DOWNSTREAM(MODIFIER||816||1053|Ndae1|protein_coding|CODING|FBtr0331662||1);INTRON(MODIFIER||||1134|Ndae1|protein_coding|CODING|FBtr0331658|10|1);INTRON(MODIFIER||||1046|Ndae1|protein_coding|CODING|FBtr0331664|9|1);INTRON(MODIFIER||||1190|Ndae1|protein_coding|CODIN…	Body Weight	-0.00304	0.9854	0.535904
Body Weight	gamma-glutamylisoleucine*	34456	-0.34508	0.0292	FBgn0263466	2R:6424000-6424165	-0.50915	0.0009	2L_7225322_SNP	0.1111	5.49599e-06	5.061e-05	0.000833333	SiteClass[FBgn0259111|Ndae1|DOWNSTREAM|816],TranscriptAnnot[DOWNSTREAM(MODIFIER||816||1086|Ndae1|protein_coding|CODING|FBtr0331659||1);DOWNSTREAM(MODIFIER||816||1053|Ndae1|protein_coding|CODING|FBtr0331662||1);INTRON(MODIFIER||||1134|Ndae1|protein_coding|CODING|FBtr0331658|10|1);INTRON(MODIFIER||||1046|Ndae1|protein_coding|CODING|FBtr0331664|9|1);INTRON(MODIFIER||||1190|Ndae1|protein_coding|CODIN…	Body Weight	0.09171	0.5787	0.535904
Body Weight	gamma-glutamylisoleucine*	34456	-0.34508	0.0292	FBgn0263482	2R:6424455-6424625	-0.60165	<.0001	2L_7225322_SNP	0.1111	5.49599e-06	1.258e-05	0.000833333	SiteClass[FBgn0259111|Ndae1|DOWNSTREAM|816],TranscriptAnnot[DOWNSTREAM(MODIFIER||816||1086|Ndae1|protein_coding|CODING|FBtr0331659||1);DOWNSTREAM(MODIFIER||816||1053|Ndae1|protein_coding|CODING|FBtr0331662||1);INTRON(MODIFIER||||1134|Ndae1|protein_coding|CODING|FBtr0331658|10|1);INTRON(MODIFIER||||1046|Ndae1|protein_coding|CODING|FBtr0331664|9|1);INTRON(MODIFIER||||1190|Ndae1|protein_coding|CODIN…	Body Weight	0.13148	0.4249	0.535904
Body Weight	gamma-glutamylisoleucine*	34456	-0.34508	0.0292	FBgn0030629	X:15234406-15236150	-0.47988	0.002	2L_7225322_SNP	0.1111	5.49599e-06	4.72e-05	0.000833333	SiteClass[FBgn0259111|Ndae1|DOWNSTREAM|816],TranscriptAnnot[DOWNSTREAM(MODIFIER||816||1086|Ndae1|protein_coding|CODING|FBtr0331659||1);DOWNSTREAM(MODIFIER||816||1053|Ndae1|protein_coding|CODING|FBtr0331662||1);INTRON(MODIFIER||||1134|Ndae1|protein_coding|CODING|FBtr0331658|10|1);INTRON(MODIFIER||||1046|Ndae1|protein_coding|CODING|FBtr0331664|9|1);INTRON(MODIFIER||||1190|Ndae1|protein_coding|CODIN…	Body Weight	-0.24768	0.1284	0.535904
Body Weight	gamma-glutamylmethionine	44872	-0.35053	0.0266	FBgn0039487	3R:22934189-22937992	-0.45275	0.0038	2L_7294808_SNP	0.1111	1.03797e-07	0.00213	0.00333333	SiteClass[|||],TranscriptAnnot[INTERGENIC(MODIFIER||||||||||1)]	Body Weight	-0.10669	0.518	0.115142
Body Weight	gamma-glutamylmethionine	44872	-0.35053	0.0266	FBgn0004387	3R:23373497-23384867	0.48534	0.0017	2L_7294808_SNP	0.1111	1.03797e-07	0.001127	0.00333333	SiteClass[|||],TranscriptAnnot[INTERGENIC(MODIFIER||||||||||1)]	Body Weight	-0.13746	0.404	0.115142
Body Weight	histamine	1574	-0.38248	0.0149	FBgn0031150	X:20924990-20953418	-0.50013	0.0012	2L_7434853_SNP	0.1026	2.66369e-06	0.0004391	0.00172414	SiteClass[|||],TranscriptAnnot[INTERGENIC(MODIFIER||||||||||1)]	Body Weight	0.14717	0.3713	0.174308
Body Weight	1-stearoyl-GPE (18:0)	42398	-0.38049	0.0154	FBgn0031117	X:20338482-20340823	-0.58016	0.0001	2L_7586579_SNP	0.1026	1.30687e-06	0.0006284	0.000943396	SiteClass[|||],TranscriptAnnot[INTERGENIC(MODIFIER||||||||||1)]	Body Weight	-0.03178	0.8477	0.362
Body Weight	N-acetyl-glucosamine 1-phosphate	15741	-0.36154	0.0219	FBgn0030098	X:9085690-9086581	-0.47045	0.0025	2L_9091507_SNP	0.1111	8.57279e-06	0.0003466	0.00138889	SiteClass[|||],TranscriptAnnot[INTERGENIC(MODIFIER||||||||||1)]	Body Weight	0.08766	0.5957	0.0838375
Body Weight	1-palmitoyl-2-linoleoyl-GPI (16:0/18:2)	52450	-0.33283	0.0359	FBgn0030607	X:14961040-14963124	0.50688	0.001	2L_9324336_SNP	0.2308	9.67109e-07	0.0005049	0.000617284	SiteClass[|||],TranscriptAnnot[INTERGENIC(MODIFIER||||||||||1)]	Body Weight	-0.20588	0.2086	0.352549
Body Weight	1-palmitoyl-2-linoleoyl-GPI (16:0/18:2)	52450	-0.33283	0.0359	FBgn0020385	3R:6522256-6529038	0.48684	0.0017	2L_9324336_SNP	0.2308	9.67109e-07	4.126e-08	0.000617284	SiteClass[|||],TranscriptAnnot[INTERGENIC(MODIFIER||||||||||1)]	Body Weight	-0.1495	0.3637	0.352549
Body Weight	1-palmitoyl-2-linoleoyl-GPI (16:0/18:2)	52450	-0.33283	0.0359	FBgn0033543	2R:6617083-6619033	0.59595	<.0001	2L_9324336_SNP	0.2308	9.67109e-07	1.049e-06	0.000617284	SiteClass[|||],TranscriptAnnot[INTERGENIC(MODIFIER||||||||||1)]	Body Weight	-0.15466	0.3472	0.352549
Body Weight	1-palmitoyl-2-linoleoyl-GPI (16:0/18:2)	52450	-0.33283	0.0359	FBgn0040606	3R:22250420-22250827	0.45931	0.0033	2L_9324336_SNP	0.2308	9.67109e-07	0.0001237	0.000617284	SiteClass[|||],TranscriptAnnot[INTERGENIC(MODIFIER||||||||||1)]	Body Weight	-0.12602	0.4446	0.352549
Body Weight	1-palmitoyl-2-linoleoyl-GPI (16:0/18:2)	52450	-0.33283	0.0359	FBgn0038681	3R:14960880-14962858	0.46579	0.0028	2L_9324336_SNP	0.2308	9.67109e-07	0.0001649	0.000617284	SiteClass[|||],TranscriptAnnot[INTERGENIC(MODIFIER||||||||||1)]	Body Weight	0.03674	0.8243	0.352549
Body Weight	histamine	1574	-0.38248	0.0149	XLOC_017830	3L:15931447-15935182	0.49162	0.0015	2L_940747_SNP	0.2051	7.84797e-06	0.000553	0.00172414	SiteClass[FBgn0028481|CG4341|INTRON|0],TranscriptAnnot[INTRON(MODIFIER||||908|CG4341|protein_coding|CODING|FBtr0305064|1|1);INTRON(MODIFIER||||938|CG4341|protein_coding|CODING|FBtr0077949|2|1)]	Body Weight	-0.05071	0.7592	0.123401
Body Weight	histamine	1574	-0.38248	0.0149	FBgn0034725	2R:18291682-18296045	-0.45832	0.0033	2L_940747_SNP	0.2051	7.84797e-06	0.0001638	0.00172414	SiteClass[FBgn0028481|CG4341|INTRON|0],TranscriptAnnot[INTRON(MODIFIER||||908|CG4341|protein_coding|CODING|FBtr0305064|1|1);INTRON(MODIFIER||||938|CG4341|protein_coding|CODING|FBtr0077949|2|1)]	Body Weight	-0.11387	0.49	0.123401
Body Weight	1-palmitoyl-2-linoleoyl-GPI (16:0/18:2)	52450	-0.33283	0.0359	FBgn0085419	2R:14427090-14436474	-0.47328	0.0023	2L_9445067_SNP	0.125	2.74929e-06	0.0005886	0.000617284	SiteClass[FBgn0002973|numb|INTRON|0],TranscriptAnnot[INTRON(MODIFIER||||515|numb|protein_coding|CODING|FBtr0079821|1|1)]	Body Weight	-0.033	0.8419	0.0526616
Body Weight	1-palmitoyl-GPG (16:0)*	45970	-0.36529	0.0205	XLOC_028011	Uextra:3177610-3178493	0.5336	0.0005	2L_9445067_SNP	0.125	9.62808e-06	0.0007052	0.00166667	SiteClass[FBgn0002973|numb|INTRON|0],TranscriptAnnot[INTRON(MODIFIER||||515|numb|protein_coding|CODING|FBtr0079821|1|1)]	Body Weight	-0.03614	0.8271	0.0526616
Body Weight	2-stearoyl-GPE (18:0)*	41220	-0.40131	0.0103	FBgn0261563	2L:14263027-14328262	-0.47753	0.0021	2L_9507191_SNP	0.2895	1.42075e-06	0.0001469	0.00108696	SiteClass[FBgn0032120|CG33298|INTRON|0],TranscriptAnnot[INTRON(MODIFIER||||1517|CG33298|protein_coding|CODING|FBtr0089853|2|1);INTRON(MODIFIER||||1494|CG33298|protein_coding|CODING|FBtr0089854|2|1);INTRON(MODIFIER||||1494|CG33298|protein_coding|CODING|FBtr0301064|3|1);INTRON(MODIFIER||||1494|CG33298|protein_coding|CODING|FBtr0301065|3|1)]	Body Weight	0.17126	0.2972	0.0567374
Body Weight	1-palmitoyl-2-linoleoyl-GPI (16:0/18:2)	52450	-0.33283	0.0359	FBgn0085419	2R:14427090-14436474	-0.47328	0.0023	2L_9834464_SNP	0.1026	2.77652e-06	0.0004031	0.000617284	SiteClass[FBgn0032151|nAChRalpha6|INTRON|0],TranscriptAnnot[INTRON(MODIFIER||||523|nAChRalpha6|protein_coding|CODING|FBtr0079912|2|1);INTRON(MODIFIER||||509|nAChRalpha6|protein_coding|CODING|FBtr0079913|3|1);INTRON(MODIFIER||||494|nAChRalpha6|protein_coding|CODING|FBtr0079914|2|1);INTRON(MODIFIER||||494|nAChRalpha6|protein_coding|CODING|FBtr0079915|3|1);INTRON(MODIFIER||||494|nAChRalpha6|protein_…	Body Weight	-0.033	0.8419	0.0708276
Body Weight	histamine	1574	-0.38248	0.0149	FBgn0031150	X:20924990-20953418	-0.50013	0.0012	2R_10314608_SNP	0.1282	7.36801e-06	0.000837	0.00172414	SiteClass[FBgn0013725|phyl|DOWNSTREAM|233],TranscriptAnnot[DOWNSTREAM(MODIFIER||233||400|phyl|protein_coding|CODING|FBtr0087516||1);INTERGENIC(MODIFIER||||||||||1)]	Body Weight	0.14717	0.3713	0.12481
Body Weight	histamine	1574	-0.38248	0.0149	XLOC_011951	2RHet:1308120-1309834	0.52179	0.0007	2R_10314608_SNP	0.1282	7.36801e-06	0.0006066	0.00172414	SiteClass[FBgn0013725|phyl|DOWNSTREAM|233],TranscriptAnnot[DOWNSTREAM(MODIFIER||233||400|phyl|protein_coding|CODING|FBtr0087516||1);INTERGENIC(MODIFIER||||||||||1)]	Body Weight	-0.16084	0.328	0.12481
Body Weight	1-stearoyl-2-linoleoyl-GPC (18:0/18:2)*	52452	-0.37242	0.018	FBgn0051100	3R:4820951-4829372	0.61457	<.0001	2R_11171259_DEL	0.4595	1.8247e-07	0.001359	0.0025	SiteClass[FBgn0265194|Trpm|INTRON|0],TranscriptAnnot[INTRON(MODIFIER||||1939|Trpm|protein_coding|CODING|FBtr0339074|4|1);INTRON(MODIFIER||||1131|Trpm|protein_coding|CODING|FBtr0339075|2|1);INTRON(MODIFIER||||1921|Trpm|protein_coding|CODING|FBtr0339076|2|1);INTRON(MODIFIER||||2023|Trpm|protein_coding|CODING|FBtr0339077|2|1);INTRON(MODIFIER||||1996|Trpm|protein_coding|CODING|FBtr0339078|2|1);INTRON…	Body Weight	-0.0998	0.5455	0.0897989
Body Weight	1-palmitoyl-2-linoleoyl-GPI (16:0/18:2)	52450	-0.33283	0.0359	FBgn0085419	2R:14427090-14436474	-0.47328	0.0023	2R_11519254_SNP	0.1282	8.81685e-07	0.0002684	0.000617284	SiteClass[FBgn0260429|CG42524|INTRON|0],TranscriptAnnot[INTRON(MODIFIER||||85|CG42524|protein_coding|CODING|FBtr0300853|2|1);INTRON(MODIFIER||||85|CG42524|protein_coding|CODING|FBtr0304712|2|1);INTRON(MODIFIER||||85|CG42524|protein_coding|CODING|FBtr0340006|2|1)]	Body Weight	-0.033	0.8419	0.286983
Body Weight	gamma-glutamylisoleucine*	34456	-0.34508	0.0292	FBgn0034128	2R:12330716-12332350	-0.49309	0.0014	2R_11598171_SNP	0.1389	1.28865e-06	0.0008053	0.000833333	SiteClass[FBgn0050083|CG30083|DOWNSTREAM|931],TranscriptAnnot[DOWNSTREAM(MODIFIER||931||279|CG30083|protein_coding|CODING|FBtr0300381||1);INTERGENIC(MODIFIER||||||||||1)]	Body Weight	-0.04302	0.7948	0.403387
Body Weight	gamma-glutamylisoleucine*	34456	-0.34508	0.0292	FBgn0262995	3R:4027202-4027716	0.45243	0.0038	2R_11598171_SNP	0.1389	1.28865e-06	0.0006896	0.000833333	SiteClass[FBgn0050083|CG30083|DOWNSTREAM|931],TranscriptAnnot[DOWNSTREAM(MODIFIER||931||279|CG30083|protein_coding|CODING|FBtr0300381||1);INTERGENIC(MODIFIER||||||||||1)]	Body Weight	-0.06873	0.6776	0.403387
Body Weight	2-stearoyl-GPE (18:0)*	41220	-0.40131	0.0103	XLOC_027415	U:8561290-8680119	0.5168	0.0008	2R_11856142_SNP	0.1026	4.61269e-06	4.913e-05	0.00108696	SiteClass[FBgn0265045|Strn-Mlck|INTRON|0],TranscriptAnnot[UPSTREAM(MODIFIER||170||1918|Strn-Mlck|protein_coding|CODING|FBtr0336648||1);INTRON(MODIFIER||||8216|Strn-Mlck|protein_coding|CODING|FBtr0336649|7|1);INTRON(MODIFIER||||7905|Strn-Mlck|protein_coding|CODING|FBtr0336650|7|1);INTRON(MODIFIER||||8255|Strn-Mlck|protein_coding|CODING|FBtr0336651|7|1);INTRON(MODIFIER||||7944|Strn-Mlck|protein_cod…	Body Weight	-0.02095	0.8993	0.0457386
Body Weight	2-stearoyl-GPE (18:0)*	41220	-0.40131	0.0103	XLOC_015512	3L:23992514-23993799	-0.48846	0.0016	2R_11856142_SNP	0.1026	4.61269e-06	0.0003079	0.00108696	SiteClass[FBgn0265045|Strn-Mlck|INTRON|0],TranscriptAnnot[UPSTREAM(MODIFIER||170||1918|Strn-Mlck|protein_coding|CODING|FBtr0336648||1);INTRON(MODIFIER||||8216|Strn-Mlck|protein_coding|CODING|FBtr0336649|7|1);INTRON(MODIFIER||||7905|Strn-Mlck|protein_coding|CODING|FBtr0336650|7|1);INTRON(MODIFIER||||8255|Strn-Mlck|protein_coding|CODING|FBtr0336651|7|1);INTRON(MODIFIER||||7944|Strn-Mlck|protein_cod…	Body Weight	0.12098	0.4632	0.0457386
Body Weight	1-palmitoyl-GPG (16:0)*	45970	-0.36529	0.0205	XLOC_028011	Uextra:3177610-3178493	0.5336	0.0005	2R_12552762_SNP	0.2571	4.25479e-06	0.001243	0.00166667	SiteClass[FBgn0024315|Picot|INTRON|0],TranscriptAnnot[INTRON(MODIFIER||||516|Picot|protein_coding|CODING|FBtr0340068|2|1);INTRON(MODIFIER||||516|Picot|protein_coding|CODING|FBtr0087114|1|1)]	Body Weight	-0.03614	0.8271	0.0352366
Body Weight	1-palmitoyl-GPG (16:0)*	45970	-0.36529	0.0205	FBgn0036727	3L:17463227-17467617	-0.57713	0.0001	2R_12552762_SNP	0.2571	4.25479e-06	0.0004377	0.00166667	SiteClass[FBgn0024315|Picot|INTRON|0],TranscriptAnnot[INTRON(MODIFIER||||516|Picot|protein_coding|CODING|FBtr0340068|2|1);INTRON(MODIFIER||||516|Picot|protein_coding|CODING|FBtr0087114|1|1)]	Body Weight	-0.07814	0.6363	0.0352366
Body Weight	1-stearoyl-GPE (18:0)	42398	-0.38049	0.0154	FBgn0051547	3R:1315227-1328424	0.483	0.0018	2R_13549302_SNP	0.1282	1.54134e-06	0.0001735	0.000943396	SiteClass[FBgn0050106|CCHa1-R|INTRON|0],TranscriptAnnot[INTRON(MODIFIER||||499|CCHa1-R|protein_coding|CODING|FBtr0086893|1|1)]	Body Weight	-0.18766	0.2526	0.101674
Body Weight	1-stearoyl-GPE (18:0)	42398	-0.38049	0.0154	FBgn0051547	3R:1315227-1328424	0.483	0.0018	2R_13549334_SNP	0.1282	1.53537e-06	6.216e-05	0.000943396	SiteClass[FBgn0050106|CCHa1-R|INTRON|0],TranscriptAnnot[INTRON(MODIFIER||||499|CCHa1-R|protein_coding|CODING|FBtr0086893|1|1)]	Body Weight	-0.18766	0.2526	0.101883
Body Weight	1-stearoyl-GPE (18:0)	42398	-0.38049	0.0154	FBgn0051547	3R:1315227-1328424	0.483	0.0018	2R_13549355_SNP	0.1282	1.34096e-06	0.0001191	0.000943396	SiteClass[FBgn0050106|CCHa1-R|INTRON|0],TranscriptAnnot[INTRON(MODIFIER||||499|CCHa1-R|protein_coding|CODING|FBtr0086893|1|1)]	Body Weight	-0.18766	0.2526	0.0975121
Body Weight	1-stearoyl-GPE (18:0)	42398	-0.38049	0.0154	XLOC_015512	3L:23992514-23993799	-0.51903	0.0007	2R_13549355_SNP	0.1282	1.34096e-06	0.0009144	0.000943396	SiteClass[FBgn0050106|CCHa1-R|INTRON|0],TranscriptAnnot[INTRON(MODIFIER||||499|CCHa1-R|protein_coding|CODING|FBtr0086893|1|1)]	Body Weight	0.12098	0.4632	0.0975121
Body Weight	gamma-glutamylisoleucine*	34456	-0.34508	0.0292	FBgn0034087	2R:12074089-12081782	0.46148	0.0031	2R_14597302_SNP	0.2	7.47839e-06	0.0002071	0.000833333	SiteClass[FBgn0034380|CG15087|SYNONYMOUS_CODING|0],TranscriptAnnot[SYNONYMOUS_CODING(LOW|SILENT|ttT/ttC|F281|740|CG15087|protein_coding|CODING|FBtr0086647|3|1)]	Body Weight	-0.17977	0.2735	0.437284
Body Weight	gamma-glutamylisoleucine*	34456	-0.34508	0.0292	FBgn0034128	2R:12330716-12332350	-0.49309	0.0014	2R_14597302_SNP	0.2	7.47839e-06	0.0005107	0.000833333	SiteClass[FBgn0034380|CG15087|SYNONYMOUS_CODING|0],TranscriptAnnot[SYNONYMOUS_CODING(LOW|SILENT|ttT/ttC|F281|740|CG15087|protein_coding|CODING|FBtr0086647|3|1)]	Body Weight	-0.04302	0.7948	0.437284
Body Weight	2-stearoyl-GPE (18:0)*	41220	-0.40131	0.0103	FBgn0263258	X:17566491-17592763	-0.45142	0.0039	2R_15029327_SNP	0.1026	2.50978e-06	0.0002308	0.00108696	SiteClass[FBgn0000578|ena|INTRON|0;FBgn0034419|CG15111|DOWNSTREAM|788],TranscriptAnnot[UTR_5_PRIME(MODIFIER||10201||684|ena|protein_coding|CODING|FBtr0100176|1|1);UTR_5_PRIME(MODIFIER||10201||684|ena|protein_coding|CODING|FBtr0086582|1|1);DOWNSTREAM(MODIFIER||788||411|CG15111|protein_coding|CODING|FBtr0086580||1);DOWNSTREAM(MODIFIER||788||393|CG15111|protein_coding|CODING|FBtr0086581||1);INTRON(M…	Body Weight	-0.04282	0.7958	0.0983718
Body Weight	2-stearoyl-GPE (18:0)*	41220	-0.40131	0.0103	XLOC_027415	U:8561290-8680119	0.5168	0.0008	2R_15029327_SNP	0.1026	2.50978e-06	7.63e-06	0.00108696	SiteClass[FBgn0000578|ena|INTRON|0;FBgn0034419|CG15111|DOWNSTREAM|788],TranscriptAnnot[UTR_5_PRIME(MODIFIER||10201||684|ena|protein_coding|CODING|FBtr0100176|1|1);UTR_5_PRIME(MODIFIER||10201||684|ena|protein_coding|CODING|FBtr0086582|1|1);DOWNSTREAM(MODIFIER||788||411|CG15111|protein_coding|CODING|FBtr0086580||1);DOWNSTREAM(MODIFIER||788||393|CG15111|protein_coding|CODING|FBtr0086581||1);INTRON(M…	Body Weight	-0.02095	0.8993	0.0983718
Body Weight	gamma-glutamylisoleucine*	34456	-0.34508	0.0292	FBgn0034128	2R:12330716-12332350	-0.49309	0.0014	2R_15339374_SNP	0.1081	6.47634e-06	0.0001609	0.000833333	SiteClass[FBgn0003887|betaTub56D|UPSTREAM|269;FBgn0034447|CG7744|UPSTREAM|635],TranscriptAnnot[UPSTREAM(MODIFIER||635||680|CG7744|protein_coding|CODING|FBtr0086535||1);UPSTREAM(MODIFIER||269||447|betaTub56D|protein_coding|CODING|FBtr0086536||1);INTERGENIC(MODIFIER||||||||||1)]	Body Weight	-0.04302	0.7948	0.66466
Body Weight	gamma-glutamylisoleucine*	34456	-0.34508	0.0292	FBgn0262995	3R:4027202-4027716	0.45243	0.0038	2R_15339374_SNP	0.1081	6.47634e-06	0.0005535	0.000833333	SiteClass[FBgn0003887|betaTub56D|UPSTREAM|269;FBgn0034447|CG7744|UPSTREAM|635],TranscriptAnnot[UPSTREAM(MODIFIER||635||680|CG7744|protein_coding|CODING|FBtr0086535||1);UPSTREAM(MODIFIER||269||447|betaTub56D|protein_coding|CODING|FBtr0086536||1);INTERGENIC(MODIFIER||||||||||1)]	Body Weight	-0.06873	0.6776	0.66466
Body Weight	gamma-glutamylisoleucine*	34456	-0.34508	0.0292	FBgn0263482	2R:6424455-6424625	-0.60165	<.0001	2R_15339374_SNP	0.1081	6.47634e-06	0.0005009	0.000833333	SiteClass[FBgn0003887|betaTub56D|UPSTREAM|269;FBgn0034447|CG7744|UPSTREAM|635],TranscriptAnnot[UPSTREAM(MODIFIER||635||680|CG7744|protein_coding|CODING|FBtr0086535||1);UPSTREAM(MODIFIER||269||447|betaTub56D|protein_coding|CODING|FBtr0086536||1);INTERGENIC(MODIFIER||||||||||1)]	Body Weight	0.13148	0.4249	0.66466
Body Weight	gamma-glutamylisoleucine*	34456	-0.34508	0.0292	FBgn0052483	3L:688523-690081	-0.53233	0.0005	2R_16065610_SNP	0.15	1.49509e-07	0.0002198	0.000833333	SiteClass[|||],TranscriptAnnot[INTERGENIC(MODIFIER||||||||||1)]	Body Weight	-0.04393	0.7906	0.825338
Body Weight	gamma-glutamylisoleucine*	34456	-0.34508	0.0292	FBgn0034128	2R:12330716-12332350	-0.49309	0.0014	2R_16065610_SNP	0.15	1.49509e-07	4.466e-05	0.000833333	SiteClass[|||],TranscriptAnnot[INTERGENIC(MODIFIER||||||||||1)]	Body Weight	-0.04302	0.7948	0.825338
Body Weight	gamma-glutamylisoleucine*	34456	-0.34508	0.0292	FBgn0015808	2L:18831229-18833630	-0.5119	0.0009	2R_16065610_SNP	0.15	1.49509e-07	7.065e-05	0.000833333	SiteClass[|||],TranscriptAnnot[INTERGENIC(MODIFIER||||||||||1)]	Body Weight	-0.20699	0.2061	0.825338
Body Weight	gamma-glutamylisoleucine*	34456	-0.34508	0.0292	FBgn0043535	2R:16392655-16393263	-0.46494	0.0029	2R_16065610_SNP	0.15	1.49509e-07	0.0005262	0.000833333	SiteClass[|||],TranscriptAnnot[INTERGENIC(MODIFIER||||||||||1)]	Body Weight	0.07845	0.635	0.825338
Body Weight	gamma-glutamylisoleucine*	34456	-0.34508	0.0292	FBgn0030629	X:15234406-15236150	-0.47988	0.002	2R_16150100_SNP	0.1026	6.3238e-06	0.0001367	0.000833333	SiteClass[FBgn0005655|PCNA|INTRON|0;FBgn0003114|plu|DOWNSTREAM|363;FBgn0034491|Hsl|DOWNSTREAM|869],TranscriptAnnot[DOWNSTREAM(MODIFIER||869||881|Hsl|protein_coding|CODING|FBtr0086270||1);DOWNSTREAM(MODIFIER||869||881|Hsl|protein_coding|CODING|FBtr0086271||1);DOWNSTREAM(MODIFIER||869||881|Hsl|protein_coding|CODING|FBtr0086272||1);DOWNSTREAM(MODIFIER||363||174|plu|protein_coding|CODING|FBtr0086306|…	Body Weight	-0.24768	0.1284	0.202245
Body Weight	1-palmitoyl-2-linoleoyl-GPI (16:0/18:2)	52450	-0.33283	0.0359	FBgn0085419	2R:14427090-14436474	-0.47328	0.0023	2R_16736048_SNP	0.1026	5.55213e-06	0.0002569	0.000617284	SiteClass[FBgn0034552|CG17999|SYNONYMOUS_CODING|0],TranscriptAnnot[SYNONYMOUS_CODING(LOW|SILENT|gtT/gtG|V364|545|CG17999|protein_coding|CODING|FBtr0071561|4|1)]	Body Weight	-0.033	0.8419	0.073115
Body Weight	2-stearoyl-GPE (18:0)*	41220	-0.40131	0.0103	FBgn0038450	3R:12443672-12445600	-0.50547	0.001	2R_16778804_SNP	0.1026	4.97505e-07	8.403e-05	0.00108696	SiteClass[FBgn0015524|otp|INTRON|0],TranscriptAnnot[INTRON(MODIFIER||||271|otp|protein_coding|CODING|FBtr0110772|3|1);INTRON(MODIFIER||||409|otp|protein_coding|CODING|FBtr0290289|4|1);INTRON(MODIFIER||||313|otp|protein_coding|CODING|FBtr0342795|3|1);INTRON(MODIFIER||||264|otp|protein_coding|CODING|FBtr0342796|3|1);INTRON(MODIFIER||||306|otp|protein_coding|CODING|FBtr0342797|3|1);INTRON(MODIFIER||…	Body Weight	0.26874	0.0981	0.077244
Body Weight	2-stearoyl-GPE (18:0)*	41220	-0.40131	0.0103	FBgn0031184	X:21849019-21851327	-0.49069	0.0015	2R_16778804_SNP	0.1026	4.97505e-07	6.471e-05	0.00108696	SiteClass[FBgn0015524|otp|INTRON|0],TranscriptAnnot[INTRON(MODIFIER||||271|otp|protein_coding|CODING|FBtr0110772|3|1);INTRON(MODIFIER||||409|otp|protein_coding|CODING|FBtr0290289|4|1);INTRON(MODIFIER||||313|otp|protein_coding|CODING|FBtr0342795|3|1);INTRON(MODIFIER||||264|otp|protein_coding|CODING|FBtr0342796|3|1);INTRON(MODIFIER||||306|otp|protein_coding|CODING|FBtr0342797|3|1);INTRON(MODIFIER||…	Body Weight	-0.05243	0.7512	0.077244
Body Weight	2-stearoyl-GPE (18:0)*	41220	-0.40131	0.0103	XLOC_027415	U:8561290-8680119	0.5168	0.0008	2R_16778804_SNP	0.1026	4.97505e-07	2.178e-06	0.00108696	SiteClass[FBgn0015524|otp|INTRON|0],TranscriptAnnot[INTRON(MODIFIER||||271|otp|protein_coding|CODING|FBtr0110772|3|1);INTRON(MODIFIER||||409|otp|protein_coding|CODING|FBtr0290289|4|1);INTRON(MODIFIER||||313|otp|protein_coding|CODING|FBtr0342795|3|1);INTRON(MODIFIER||||264|otp|protein_coding|CODING|FBtr0342796|3|1);INTRON(MODIFIER||||306|otp|protein_coding|CODING|FBtr0342797|3|1);INTRON(MODIFIER||…	Body Weight	-0.02095	0.8993	0.077244
Body Weight	N-acetyl-glucosamine 1-phosphate	15741	-0.36154	0.0219	FBgn0020766	2R:9855813-9857407	-0.46134	0.0031	2R_16788230_SNP	0.1538	6.8157e-07	0.000298	0.00138889	SiteClass[FBgn0015524|otp|INTRON|0],TranscriptAnnot[INTRON(MODIFIER||||409|otp|protein_coding|CODING|FBtr0290289|2|1);INTRON(MODIFIER||||367|otp|protein_coding|CODING|FBtr0342798|2|1);INTRON(MODIFIER||||374|otp|protein_coding|CODING|FBtr0342799|2|1);INTRON(MODIFIER||||416|otp|protein_coding|CODING|FBtr0342800|2|1)]	Body Weight	0.14444	0.3803	0.0729908
Body Weight	N-acetyl-glucosamine 1-phosphate	15741	-0.36154	0.0219	FBgn0267035	X:2067513-2069888	-0.45283	0.0038	2R_16788230_SNP	0.1538	6.8157e-07	0.0006751	0.00138889	SiteClass[FBgn0015524|otp|INTRON|0],TranscriptAnnot[INTRON(MODIFIER||||409|otp|protein_coding|CODING|FBtr0290289|2|1);INTRON(MODIFIER||||367|otp|protein_coding|CODING|FBtr0342798|2|1);INTRON(MODIFIER||||374|otp|protein_coding|CODING|FBtr0342799|2|1);INTRON(MODIFIER||||416|otp|protein_coding|CODING|FBtr0342800|2|1)]	Body Weight	-0.03016	0.8554	0.0729908
Body Weight	N-acetyl-glucosamine 1-phosphate	15741	-0.36154	0.0219	FBgn0031694	2L:5266392-5268455	-0.4664	0.0028	2R_16788230_SNP	0.1538	6.8157e-07	0.0002075	0.00138889	SiteClass[FBgn0015524|otp|INTRON|0],TranscriptAnnot[INTRON(MODIFIER||||409|otp|protein_coding|CODING|FBtr0290289|2|1);INTRON(MODIFIER||||367|otp|protein_coding|CODING|FBtr0342798|2|1);INTRON(MODIFIER||||374|otp|protein_coding|CODING|FBtr0342799|2|1);INTRON(MODIFIER||||416|otp|protein_coding|CODING|FBtr0342800|2|1)]	Body Weight	-0.05942	0.7194	0.0729908
Body Weight	N-acetyl-glucosamine 1-phosphate	15741	-0.36154	0.0219	XLOC_031907	X:12771234-12775701	0.46518	0.0028	2R_16788230_SNP	0.1538	6.8157e-07	0.001301	0.00138889	SiteClass[FBgn0015524|otp|INTRON|0],TranscriptAnnot[INTRON(MODIFIER||||409|otp|protein_coding|CODING|FBtr0290289|2|1);INTRON(MODIFIER||||367|otp|protein_coding|CODING|FBtr0342798|2|1);INTRON(MODIFIER||||374|otp|protein_coding|CODING|FBtr0342799|2|1);INTRON(MODIFIER||||416|otp|protein_coding|CODING|FBtr0342800|2|1)]	Body Weight	-0.25437	0.1181	0.0729908
Body Weight	N-acetyl-glucosamine 1-phosphate	15741	-0.36154	0.0219	FBgn0083969	3R:25695087-25700881	0.51498	0.0008	2R_16788230_SNP	0.1538	6.8157e-07	0.0002214	0.00138889	SiteClass[FBgn0015524|otp|INTRON|0],TranscriptAnnot[INTRON(MODIFIER||||409|otp|protein_coding|CODING|FBtr0290289|2|1);INTRON(MODIFIER||||367|otp|protein_coding|CODING|FBtr0342798|2|1);INTRON(MODIFIER||||374|otp|protein_coding|CODING|FBtr0342799|2|1);INTRON(MODIFIER||||416|otp|protein_coding|CODING|FBtr0342800|2|1)]	Body Weight	-0.07146	0.6655	0.0729908
Body Weight	N-acetyl-glucosamine 1-phosphate	15741	-0.36154	0.0219	FBgn0039312	3R:21104149-21105568	-0.56761	0.0002	2R_16788230_SNP	0.1538	6.8157e-07	1.458e-05	0.00138889	SiteClass[FBgn0015524|otp|INTRON|0],TranscriptAnnot[INTRON(MODIFIER||||409|otp|protein_coding|CODING|FBtr0290289|2|1);INTRON(MODIFIER||||367|otp|protein_coding|CODING|FBtr0342798|2|1);INTRON(MODIFIER||||374|otp|protein_coding|CODING|FBtr0342799|2|1);INTRON(MODIFIER||||416|otp|protein_coding|CODING|FBtr0342800|2|1)]	Body Weight	-0.16985	0.3013	0.0729908
Body Weight	N-acetyl-glucosamine 1-phosphate	15741	-0.36154	0.0219	FBgn0039312	3R:21104149-21105568	-0.56761	0.0002	2R_16788241_SNP	0.1622	1.35907e-06	2.169e-05	0.00138889	SiteClass[FBgn0015524|otp|INTRON|0],TranscriptAnnot[INTRON(MODIFIER||||409|otp|protein_coding|CODING|FBtr0290289|2|1);INTRON(MODIFIER||||367|otp|protein_coding|CODING|FBtr0342798|2|1);INTRON(MODIFIER||||374|otp|protein_coding|CODING|FBtr0342799|2|1);INTRON(MODIFIER||||416|otp|protein_coding|CODING|FBtr0342800|2|1)]	Body Weight	-0.16985	0.3013	0.0703809
Body Weight	N-acetyl-glucosamine 1-phosphate	15741	-0.36154	0.0219	FBgn0031694	2L:5266392-5268455	-0.4664	0.0028	2R_16788241_SNP	0.1622	1.35907e-06	0.0003022	0.00138889	SiteClass[FBgn0015524|otp|INTRON|0],TranscriptAnnot[INTRON(MODIFIER||||409|otp|protein_coding|CODING|FBtr0290289|2|1);INTRON(MODIFIER||||367|otp|protein_coding|CODING|FBtr0342798|2|1);INTRON(MODIFIER||||374|otp|protein_coding|CODING|FBtr0342799|2|1);INTRON(MODIFIER||||416|otp|protein_coding|CODING|FBtr0342800|2|1)]	Body Weight	-0.05942	0.7194	0.0703809
Body Weight	N-acetyl-glucosamine 1-phosphate	15741	-0.36154	0.0219	FBgn0267035	X:2067513-2069888	-0.45283	0.0038	2R_16788241_SNP	0.1622	1.35907e-06	0.000993	0.00138889	SiteClass[FBgn0015524|otp|INTRON|0],TranscriptAnnot[INTRON(MODIFIER||||409|otp|protein_coding|CODING|FBtr0290289|2|1);INTRON(MODIFIER||||367|otp|protein_coding|CODING|FBtr0342798|2|1);INTRON(MODIFIER||||374|otp|protein_coding|CODING|FBtr0342799|2|1);INTRON(MODIFIER||||416|otp|protein_coding|CODING|FBtr0342800|2|1)]	Body Weight	-0.03016	0.8554	0.0703809
Body Weight	N-acetyl-glucosamine 1-phosphate	15741	-0.36154	0.0219	FBgn0083969	3R:25695087-25700881	0.51498	0.0008	2R_16788241_SNP	0.1622	1.35907e-06	0.0002925	0.00138889	SiteClass[FBgn0015524|otp|INTRON|0],TranscriptAnnot[INTRON(MODIFIER||||409|otp|protein_coding|CODING|FBtr0290289|2|1);INTRON(MODIFIER||||367|otp|protein_coding|CODING|FBtr0342798|2|1);INTRON(MODIFIER||||374|otp|protein_coding|CODING|FBtr0342799|2|1);INTRON(MODIFIER||||416|otp|protein_coding|CODING|FBtr0342800|2|1)]	Body Weight	-0.07146	0.6655	0.0703809
Body Weight	N-acetyl-glucosamine 1-phosphate	15741	-0.36154	0.0219	FBgn0020766	2R:9855813-9857407	-0.46134	0.0031	2R_16788241_SNP	0.1622	1.35907e-06	0.0004883	0.00138889	SiteClass[FBgn0015524|otp|INTRON|0],TranscriptAnnot[INTRON(MODIFIER||||409|otp|protein_coding|CODING|FBtr0290289|2|1);INTRON(MODIFIER||||367|otp|protein_coding|CODING|FBtr0342798|2|1);INTRON(MODIFIER||||374|otp|protein_coding|CODING|FBtr0342799|2|1);INTRON(MODIFIER||||416|otp|protein_coding|CODING|FBtr0342800|2|1)]	Body Weight	0.14444	0.3803	0.0703809
Body Weight	N-acetyl-glucosamine 1-phosphate	15741	-0.36154	0.0219	FBgn0039312	3R:21104149-21105568	-0.56761	0.0002	2R_16788284_SNP	0.1538	8.91267e-06	0.0002816	0.00138889	SiteClass[FBgn0015524|otp|INTRON|0],TranscriptAnnot[INTRON(MODIFIER||||409|otp|protein_coding|CODING|FBtr0290289|2|1);INTRON(MODIFIER||||367|otp|protein_coding|CODING|FBtr0342798|2|1);INTRON(MODIFIER||||374|otp|protein_coding|CODING|FBtr0342799|2|1);INTRON(MODIFIER||||416|otp|protein_coding|CODING|FBtr0342800|2|1)]	Body Weight	-0.16985	0.3013	0.593585
Body Weight	N-acetyl-glucosamine 1-phosphate	15741	-0.36154	0.0219	FBgn0031694	2L:5266392-5268455	-0.4664	0.0028	2R_16788284_SNP	0.1538	8.91267e-06	0.0006176	0.00138889	SiteClass[FBgn0015524|otp|INTRON|0],TranscriptAnnot[INTRON(MODIFIER||||409|otp|protein_coding|CODING|FBtr0290289|2|1);INTRON(MODIFIER||||367|otp|protein_coding|CODING|FBtr0342798|2|1);INTRON(MODIFIER||||374|otp|protein_coding|CODING|FBtr0342799|2|1);INTRON(MODIFIER||||416|otp|protein_coding|CODING|FBtr0342800|2|1)]	Body Weight	-0.05942	0.7194	0.593585
Body Weight	1-palmitoyl-GPG (16:0)*	45970	-0.36529	0.0205	FBgn0000326	2R:17504566-17506584	-0.54737	0.0003	2R_17462002_SNP	0.3421	3.34745e-07	0.001356	0.00166667	SiteClass[FBgn0034636|CG10440|INTRON|0],TranscriptAnnot[INTRON(MODIFIER||||367|CG10440|protein_coding|CODING|FBtr0308642|1|1)]	Body Weight	-0.21033	0.1987	0.0740033
Body Weight	1-palmitoyl-GPG (16:0)*	45970	-0.36529	0.0205	FBgn0040251	3R:6976748-6979571	-0.46194	0.0031	2R_17462002_SNP	0.3421	3.34745e-07	0.0002781	0.00166667	SiteClass[FBgn0034636|CG10440|INTRON|0],TranscriptAnnot[INTRON(MODIFIER||||367|CG10440|protein_coding|CODING|FBtr0308642|1|1)]	Body Weight	0.28453	0.0792	0.0740033
Body Weight	1-palmitoyl-2-linoleoyl-GPI (16:0/18:2)	52450	-0.33283	0.0359	FBgn0020385	3R:6522256-6529038	0.48684	0.0017	2R_17652969_SNP	0.1026	1.34606e-06	0.0003259	0.000617284	SiteClass[FBgn0050395|CG30395|UPSTREAM|25;FBgn0264716|CR43984|UPSTREAM|169;FBgn0264714|CG43982|DOWNSTREAM|769],TranscriptAnnot[UPSTREAM(MODIFIER||25||906|CG30395|protein_coding|CODING|FBtr0300226||1);UPSTREAM(MODIFIER||25||686|CG30395|protein_coding|CODING|FBtr0334047||1);UPSTREAM(MODIFIER||25||836|CG30395|protein_coding|CODING|FBtr0334048||1);UPSTREAM(MODIFIER||169|||CR43984|ncRNA|NON_CODING|FBt…	Body Weight	-0.1495	0.3637	0.242011
Body Weight	1-palmitoyl-2-palmitoleoyl-GPC (16:0/16:1)*	52470	-0.34578	0.0289	FBgn0002719	3R:8538825-8548164	0.54211	0.0004	2R_17652969_SNP	0.1026	1.37257e-07	0.0004672	0.000555556	SiteClass[FBgn0050395|CG30395|UPSTREAM|25;FBgn0264716|CR43984|UPSTREAM|169;FBgn0264714|CG43982|DOWNSTREAM|769],TranscriptAnnot[UPSTREAM(MODIFIER||25||906|CG30395|protein_coding|CODING|FBtr0300226||1);UPSTREAM(MODIFIER||25||686|CG30395|protein_coding|CODING|FBtr0334047||1);UPSTREAM(MODIFIER||25||836|CG30395|protein_coding|CODING|FBtr0334048||1);UPSTREAM(MODIFIER||169|||CR43984|ncRNA|NON_CODING|FBt…	Body Weight	-0.11104	0.501	0.242011
Body Weight	1-palmitoyl-2-linoleoyl-GPI (16:0/18:2)	52450	-0.33283	0.0359	FBgn0002719	3R:8538825-8548164	0.483	0.0018	2R_17652969_SNP	0.1026	1.34606e-06	0.0004672	0.000617284	SiteClass[FBgn0050395|CG30395|UPSTREAM|25;FBgn0264716|CR43984|UPSTREAM|169;FBgn0264714|CG43982|DOWNSTREAM|769],TranscriptAnnot[UPSTREAM(MODIFIER||25||906|CG30395|protein_coding|CODING|FBtr0300226||1);UPSTREAM(MODIFIER||25||686|CG30395|protein_coding|CODING|FBtr0334047||1);UPSTREAM(MODIFIER||25||836|CG30395|protein_coding|CODING|FBtr0334048||1);UPSTREAM(MODIFIER||169|||CR43984|ncRNA|NON_CODING|FBt…	Body Weight	-0.11104	0.501	0.242011
Body Weight	1-stearoyl-GPE (18:0)	42398	-0.38049	0.0154	FBgn0031515	2L:3291245-3294706	0.47186	0.0024	2R_17652970_SNP	0.125	7.48591e-06	0.000614	0.000943396	SiteClass[FBgn0050395|CG30395|UPSTREAM|24;FBgn0264716|CR43984|UPSTREAM|170;FBgn0264714|CG43982|DOWNSTREAM|770],TranscriptAnnot[UPSTREAM(MODIFIER||24||906|CG30395|protein_coding|CODING|FBtr0300226||1);UPSTREAM(MODIFIER||24||686|CG30395|protein_coding|CODING|FBtr0334047||1);UPSTREAM(MODIFIER||24||836|CG30395|protein_coding|CODING|FBtr0334048||1);UPSTREAM(MODIFIER||170|||CR43984|ncRNA|NON_CODING|FBt…	Body Weight	-0.20203	0.2174	0.0818995
Body Weight	N-acetyl-glucosamine 1-phosphate	15741	-0.36154	0.0219	FBgn0083969	3R:25695087-25700881	0.51498	0.0008	2R_1789679_SNP	0.1316	1.20809e-06	0.0007916	0.00138889	SiteClass[FBgn0263109|CG43366|INTRON|0],TranscriptAnnot[INTRON(MODIFIER||||2140|CG43366|protein_coding|CODING|FBtr0307307|2|1)]	Body Weight	-0.07146	0.6655	0.170827
Body Weight	N-acetyl-glucosamine 1-phosphate	15741	-0.36154	0.0219	FBgn0085337	3R:8914964-8915803	-0.46802	0.0027	2R_1789679_SNP	0.1316	1.20809e-06	0.0001929	0.00138889	SiteClass[FBgn0263109|CG43366|INTRON|0],TranscriptAnnot[INTRON(MODIFIER||||2140|CG43366|protein_coding|CODING|FBtr0307307|2|1)]	Body Weight	0.10132	0.5394	0.170827
Body Weight	N-acetyl-glucosamine 1-phosphate	15741	-0.36154	0.0219	FBgn0020766	2R:9855813-9857407	-0.46134	0.0031	2R_1789679_SNP	0.1316	1.20809e-06	0.0004641	0.00138889	SiteClass[FBgn0263109|CG43366|INTRON|0],TranscriptAnnot[INTRON(MODIFIER||||2140|CG43366|protein_coding|CODING|FBtr0307307|2|1)]	Body Weight	0.14444	0.3803	0.170827
Body Weight	N-acetyl-glucosamine 1-phosphate	15741	-0.36154	0.0219	XLOC_001893	2L:13886803-13887277	0.55789	0.0002	2R_1789679_SNP	0.1316	1.20809e-06	0.0002679	0.00138889	SiteClass[FBgn0263109|CG43366|INTRON|0],TranscriptAnnot[INTRON(MODIFIER||||2140|CG43366|protein_coding|CODING|FBtr0307307|2|1)]	Body Weight	-0.05982	0.7175	0.170827
Body Weight	N-acetyl-glucosamine 1-phosphate	15741	-0.36154	0.0219	FBgn0039312	3R:21104149-21105568	-0.56761	0.0002	2R_1789679_SNP	0.1316	1.20809e-06	0.0003207	0.00138889	SiteClass[FBgn0263109|CG43366|INTRON|0],TranscriptAnnot[INTRON(MODIFIER||||2140|CG43366|protein_coding|CODING|FBtr0307307|2|1)]	Body Weight	-0.16985	0.3013	0.170827
Body Weight	N-acetyl-glucosamine 1-phosphate	15741	-0.36154	0.0219	FBgn0036332	3L:13002499-13004785	0.47429	0.0023	2R_1789679_SNP	0.1316	1.20809e-06	0.0006207	0.00138889	SiteClass[FBgn0263109|CG43366|INTRON|0],TranscriptAnnot[INTRON(MODIFIER||||2140|CG43366|protein_coding|CODING|FBtr0307307|2|1)]	Body Weight	-0.49719	0.0013	0.170827
Body Weight	N-acetyl-glucosamine 1-phosphate	15741	-0.36154	0.0219	FBgn0034511	2R:16413816-16414330	0.48138	0.0019	2R_18195989_DEL	0.1538	4.00177e-06	0.0001418	0.00138889	SiteClass[FBgn0034718|wdp|INTRON|0],TranscriptAnnot[INTRON(MODIFIER||||677|wdp|protein_coding|CODING|FBtr0071850|1|1);INTRON(MODIFIER||||677|wdp|protein_coding|CODING|FBtr0071852|1|1);INTRON(MODIFIER||||677|wdp|protein_coding|CODING|FBtr0071851|1|1);INTRON(MODIFIER||||677|wdp|protein_coding|CODING|FBtr0071849|1|1)]	Body Weight	-0.30174	0.0619	0.0998504
Body Weight	N-acetyl-glucosamine 1-phosphate	15741	-0.36154	0.0219	XLOC_019523	3LHet:2220773-2223122	-0.46235	0.003	2R_18195989_DEL	0.1538	4.00177e-06	0.00122	0.00138889	SiteClass[FBgn0034718|wdp|INTRON|0],TranscriptAnnot[INTRON(MODIFIER||||677|wdp|protein_coding|CODING|FBtr0071850|1|1);INTRON(MODIFIER||||677|wdp|protein_coding|CODING|FBtr0071852|1|1);INTRON(MODIFIER||||677|wdp|protein_coding|CODING|FBtr0071851|1|1);INTRON(MODIFIER||||677|wdp|protein_coding|CODING|FBtr0071849|1|1)]	Body Weight	0.07217	0.6624	0.0998504
Body Weight	N-acetyl-glucosamine 1-phosphate	15741	-0.36154	0.0219	FBgn0085370	2L:18532025-18590342	0.5668	0.0002	2R_18275528_SNP	0.15	5.42454e-06	0.0005895	0.00138889	SiteClass[FBgn0034723|CG13506|INTRON|0;FBgn0265978|CR44757|DOWNSTREAM|128],TranscriptAnnot[DOWNSTREAM(MODIFIER||128|||CR44757|ncRNA|NON_CODING|FBtr0342995||1);INTRON(MODIFIER||||503|CG13506|protein_coding|CODING|FBtr0071822|2|1);INTRON(MODIFIER||||503|CG13506|protein_coding|CODING|FBtr0342989|2|1)]	Body Weight	-0.40478	0.0106	0.226452
Body Weight	N-acetyl-glucosamine 1-phosphate	15741	-0.36154	0.0219	XLOC_001893	2L:13886803-13887277	0.55789	0.0002	2R_18275528_SNP	0.15	5.42454e-06	0.0002739	0.00138889	SiteClass[FBgn0034723|CG13506|INTRON|0;FBgn0265978|CR44757|DOWNSTREAM|128],TranscriptAnnot[DOWNSTREAM(MODIFIER||128|||CR44757|ncRNA|NON_CODING|FBtr0342995||1);INTRON(MODIFIER||||503|CG13506|protein_coding|CODING|FBtr0071822|2|1);INTRON(MODIFIER||||503|CG13506|protein_coding|CODING|FBtr0342989|2|1)]	Body Weight	-0.05982	0.7175	0.226452
Body Weight	N-acetyl-glucosamine 1-phosphate	15741	-0.36154	0.0219	FBgn0085337	3R:8914964-8915803	-0.46802	0.0027	2R_18275528_SNP	0.15	5.42454e-06	0.0006523	0.00138889	SiteClass[FBgn0034723|CG13506|INTRON|0;FBgn0265978|CR44757|DOWNSTREAM|128],TranscriptAnnot[DOWNSTREAM(MODIFIER||128|||CR44757|ncRNA|NON_CODING|FBtr0342995||1);INTRON(MODIFIER||||503|CG13506|protein_coding|CODING|FBtr0071822|2|1);INTRON(MODIFIER||||503|CG13506|protein_coding|CODING|FBtr0342989|2|1)]	Body Weight	0.10132	0.5394	0.226452
Body Weight	N-acetyl-glucosamine 1-phosphate	15741	-0.36154	0.0219	XLOC_001893	2L:13886803-13887277	0.55789	0.0002	2R_18276027_SNP	0.1316	1.0666e-06	0.0002668	0.00138889	SiteClass[FBgn0034723|CG13506|INTRON|0;FBgn0265978|CR44757|DOWNSTREAM|627],TranscriptAnnot[DOWNSTREAM(MODIFIER||627|||CR44757|ncRNA|NON_CODING|FBtr0342995||1);INTRON(MODIFIER||||503|CG13506|protein_coding|CODING|FBtr0071822|2|1);INTRON(MODIFIER||||503|CG13506|protein_coding|CODING|FBtr0342989|2|1)]	Body Weight	-0.05982	0.7175	0.201455
Body Weight	N-acetyl-glucosamine 1-phosphate	15741	-0.36154	0.0219	FBgn0085337	3R:8914964-8915803	-0.46802	0.0027	2R_18276027_SNP	0.1316	1.0666e-06	0.0003121	0.00138889	SiteClass[FBgn0034723|CG13506|INTRON|0;FBgn0265978|CR44757|DOWNSTREAM|627],TranscriptAnnot[DOWNSTREAM(MODIFIER||627|||CR44757|ncRNA|NON_CODING|FBtr0342995||1);INTRON(MODIFIER||||503|CG13506|protein_coding|CODING|FBtr0071822|2|1);INTRON(MODIFIER||||503|CG13506|protein_coding|CODING|FBtr0342989|2|1)]	Body Weight	0.10132	0.5394	0.201455
Body Weight	N-acetyl-glucosamine 1-phosphate	15741	-0.36154	0.0219	FBgn0020766	2R:9855813-9857407	-0.46134	0.0031	2R_18276027_SNP	0.1316	1.0666e-06	0.0007313	0.00138889	SiteClass[FBgn0034723|CG13506|INTRON|0;FBgn0265978|CR44757|DOWNSTREAM|627],TranscriptAnnot[DOWNSTREAM(MODIFIER||627|||CR44757|ncRNA|NON_CODING|FBtr0342995||1);INTRON(MODIFIER||||503|CG13506|protein_coding|CODING|FBtr0071822|2|1);INTRON(MODIFIER||||503|CG13506|protein_coding|CODING|FBtr0342989|2|1)]	Body Weight	0.14444	0.3803	0.201455
Body Weight	N-acetyl-glucosamine 1-phosphate	15741	-0.36154	0.0219	FBgn0039312	3R:21104149-21105568	-0.56761	0.0002	2R_18276027_SNP	0.1316	1.0666e-06	0.0003399	0.00138889	SiteClass[FBgn0034723|CG13506|INTRON|0;FBgn0265978|CR44757|DOWNSTREAM|627],TranscriptAnnot[DOWNSTREAM(MODIFIER||627|||CR44757|ncRNA|NON_CODING|FBtr0342995||1);INTRON(MODIFIER||||503|CG13506|protein_coding|CODING|FBtr0071822|2|1);INTRON(MODIFIER||||503|CG13506|protein_coding|CODING|FBtr0342989|2|1)]	Body Weight	-0.16985	0.3013	0.201455
Body Weight	N-acetyl-glucosamine 1-phosphate	15741	-0.36154	0.0219	FBgn0085370	2L:18532025-18590342	0.5668	0.0002	2R_18276027_SNP	0.1316	1.0666e-06	0.0008694	0.00138889	SiteClass[FBgn0034723|CG13506|INTRON|0;FBgn0265978|CR44757|DOWNSTREAM|627],TranscriptAnnot[DOWNSTREAM(MODIFIER||627|||CR44757|ncRNA|NON_CODING|FBtr0342995||1);INTRON(MODIFIER||||503|CG13506|protein_coding|CODING|FBtr0071822|2|1);INTRON(MODIFIER||||503|CG13506|protein_coding|CODING|FBtr0342989|2|1)]	Body Weight	-0.40478	0.0106	0.201455
Body Weight	N-acetyl-glucosamine 1-phosphate	15741	-0.36154	0.0219	FBgn0083969	3R:25695087-25700881	0.51498	0.0008	2R_18276027_SNP	0.1316	1.0666e-06	0.0006497	0.00138889	SiteClass[FBgn0034723|CG13506|INTRON|0;FBgn0265978|CR44757|DOWNSTREAM|627],TranscriptAnnot[DOWNSTREAM(MODIFIER||627|||CR44757|ncRNA|NON_CODING|FBtr0342995||1);INTRON(MODIFIER||||503|CG13506|protein_coding|CODING|FBtr0071822|2|1);INTRON(MODIFIER||||503|CG13506|protein_coding|CODING|FBtr0342989|2|1)]	Body Weight	-0.07146	0.6655	0.201455
Body Weight	gamma-glutamylisoleucine*	34456	-0.34508	0.0292	FBgn0034128	2R:12330716-12332350	-0.49309	0.0014	2R_18294616_SNP	0.2368	8.42005e-06	0.0005519	0.000833333	SiteClass[FBgn0034725|CG6044|SYNONYMOUS_CODING|0],TranscriptAnnot[SYNONYMOUS_CODING(LOW|SILENT|ggT/ggA|G41|229|CG6044|protein_coding|CODING|FBtr0339533|2|1);SYNONYMOUS_CODING(LOW|SILENT|ggT/ggA|G41|229|CG6044|protein_coding|CODING|FBtr0071823|2|1)]	Body Weight	-0.04302	0.7948	0.847433
Body Weight	1-palmitoyl-2-linoleoyl-GPI (16:0/18:2)	52450	-0.33283	0.0359	XLOC_007002	2R:6487329-6488160	-0.54291	0.0004	2R_18399905_SNP	0.4118	6.25659e-06	0.0005553	0.000617284	SiteClass[FBgn0003175|px|INTRON|0],TranscriptAnnot[INTRON(MODIFIER||||944|px|protein_coding|CODING|FBtr0331941|1|1);INTRON(MODIFIER||||1995|px|protein_coding|CODING|FBtr0071838|12|1);INTRON(MODIFIER||||1535|px|protein_coding|CODING|FBtr0112820|11|1);INTRON(MODIFIER||||1916|px|protein_coding|CODING|FBtr0331942|12|1)]	Body Weight	0.04808	0.7713	0.900673
Body Weight	1-palmitoyl-2-palmitoleoyl-GPC (16:0/16:1)*	52470	-0.34578	0.0289	FBgn0002719	3R:8538825-8548164	0.54211	0.0004	2R_20030487_SNP	0.2	1.6e-06	0.0005515	0.000555556	SiteClass[FBgn0019643|Dat|INTRON|0],TranscriptAnnot[INTRON(MODIFIER||||240|Dat|protein_coding|CODING|FBtr0072254|1|1)]	Body Weight	-0.11104	0.501	0.0115623
Body Weight	N-acetyl-glucosamine 1-phosphate	15741	-0.36154	0.0219	FBgn0267035	X:2067513-2069888	-0.45283	0.0038	2R_2105557_SNP	0.1026	2.86165e-06	0.001151	0.00138889	SiteClass[FBgn0265044|CR44161|INTRON|0;FBgn0263144|bin3|INTRON|0],TranscriptAnnot[INTRON(MODIFIER||||1367|bin3|protein_coding|CODING|FBtr0085992|1|1);INTRON(MODIFIER|||||CR44161|ncRNA|NON_CODING|FBtr0336522|1|1)]	Body Weight	-0.03016	0.8554	0.365188
Body Weight	N-acetyl-glucosamine 1-phosphate	15741	-0.36154	0.0219	FBgn0039381	3R:21707706-21713952	0.45061	0.004	2R_2105557_SNP	0.1026	2.86165e-06	0.0007067	0.00138889	SiteClass[FBgn0265044|CR44161|INTRON|0;FBgn0263144|bin3|INTRON|0],TranscriptAnnot[INTRON(MODIFIER||||1367|bin3|protein_coding|CODING|FBtr0085992|1|1);INTRON(MODIFIER|||||CR44161|ncRNA|NON_CODING|FBtr0336522|1|1)]	Body Weight	-0.28149	0.0826	0.365188
Body Weight	N-acetyl-glucosamine 1-phosphate	15741	-0.36154	0.0219	FBgn0085356	X:17117001-17117848	-0.64534	<.0001	2R_2105557_SNP	0.1026	2.86165e-06	0.0005956	0.00138889	SiteClass[FBgn0265044|CR44161|INTRON|0;FBgn0263144|bin3|INTRON|0],TranscriptAnnot[INTRON(MODIFIER||||1367|bin3|protein_coding|CODING|FBtr0085992|1|1);INTRON(MODIFIER|||||CR44161|ncRNA|NON_CODING|FBtr0336522|1|1)]	Body Weight	0.01083	0.9478	0.365188
Body Weight	N-acetyl-glucosamine 1-phosphate	15741	-0.36154	0.0219	FBgn0039312	3R:21104149-21105568	-0.56761	0.0002	2R_2105557_SNP	0.1026	2.86165e-06	3.844e-05	0.00138889	SiteClass[FBgn0265044|CR44161|INTRON|0;FBgn0263144|bin3|INTRON|0],TranscriptAnnot[INTRON(MODIFIER||||1367|bin3|protein_coding|CODING|FBtr0085992|1|1);INTRON(MODIFIER|||||CR44161|ncRNA|NON_CODING|FBtr0336522|1|1)]	Body Weight	-0.16985	0.3013	0.365188
Body Weight	N-acetyl-glucosamine 1-phosphate	15741	-0.36154	0.0219	FBgn0085356	X:17117001-17117848	-0.64534	<.0001	2R_2106502_SNP	0.1053	5.36305e-06	0.0007532	0.00138889	SiteClass[FBgn0263144|bin3|INTRON|0;FBgn0265044|CR44161|UPSTREAM|378],TranscriptAnnot[UPSTREAM(MODIFIER||378|||CR44161|ncRNA|NON_CODING|FBtr0336522||1);INTRON(MODIFIER||||1367|bin3|protein_coding|CODING|FBtr0085992|1|1)]	Body Weight	0.01083	0.9478	0.365061
Body Weight	N-acetyl-glucosamine 1-phosphate	15741	-0.36154	0.0219	FBgn0039381	3R:21707706-21713952	0.45061	0.004	2R_2106502_SNP	0.1053	5.36305e-06	0.0008215	0.00138889	SiteClass[FBgn0263144|bin3|INTRON|0;FBgn0265044|CR44161|UPSTREAM|378],TranscriptAnnot[UPSTREAM(MODIFIER||378|||CR44161|ncRNA|NON_CODING|FBtr0336522||1);INTRON(MODIFIER||||1367|bin3|protein_coding|CODING|FBtr0085992|1|1)]	Body Weight	-0.28149	0.0826	0.365061
Body Weight	N-acetyl-glucosamine 1-phosphate	15741	-0.36154	0.0219	FBgn0039312	3R:21104149-21105568	-0.56761	0.0002	2R_2106502_SNP	0.1053	5.36305e-06	2.765e-05	0.00138889	SiteClass[FBgn0263144|bin3|INTRON|0;FBgn0265044|CR44161|UPSTREAM|378],TranscriptAnnot[UPSTREAM(MODIFIER||378|||CR44161|ncRNA|NON_CODING|FBtr0336522||1);INTRON(MODIFIER||||1367|bin3|protein_coding|CODING|FBtr0085992|1|1)]	Body Weight	-0.16985	0.3013	0.365061
Body Weight	N-acetyl-glucosamine 1-phosphate	15741	-0.36154	0.0219	FBgn0039381	3R:21707706-21713952	0.45061	0.004	2R_2131472_SNP	0.1053	2.10922e-06	0.0008915	0.00138889	SiteClass[FBgn0033075|Pld|INTRON|0],TranscriptAnnot[INTRON(MODIFIER||||1278|Pld|protein_coding|CODING|FBtr0085995|1|1);INTRON(MODIFIER||||1278|Pld|protein_coding|CODING|FBtr0085996|1|1);INTRON(MODIFIER||||1278|Pld|protein_coding|CODING|FBtr0085997|2|1)]	Body Weight	-0.28149	0.0826	0.326787
Body Weight	N-acetyl-glucosamine 1-phosphate	15741	-0.36154	0.0219	FBgn0085356	X:17117001-17117848	-0.64534	<.0001	2R_2131472_SNP	0.1053	2.10922e-06	0.0007552	0.00138889	SiteClass[FBgn0033075|Pld|INTRON|0],TranscriptAnnot[INTRON(MODIFIER||||1278|Pld|protein_coding|CODING|FBtr0085995|1|1);INTRON(MODIFIER||||1278|Pld|protein_coding|CODING|FBtr0085996|1|1);INTRON(MODIFIER||||1278|Pld|protein_coding|CODING|FBtr0085997|2|1)]	Body Weight	0.01083	0.9478	0.326787
Body Weight	N-acetyl-glucosamine 1-phosphate	15741	-0.36154	0.0219	FBgn0039312	3R:21104149-21105568	-0.56761	0.0002	2R_2131472_SNP	0.1053	2.10922e-06	4.449e-05	0.00138889	SiteClass[FBgn0033075|Pld|INTRON|0],TranscriptAnnot[INTRON(MODIFIER||||1278|Pld|protein_coding|CODING|FBtr0085995|1|1);INTRON(MODIFIER||||1278|Pld|protein_coding|CODING|FBtr0085996|1|1);INTRON(MODIFIER||||1278|Pld|protein_coding|CODING|FBtr0085997|2|1)]	Body Weight	-0.16985	0.3013	0.326787
Body Weight	N-acetyl-glucosamine 1-phosphate	15741	-0.36154	0.0219	FBgn0267035	X:2067513-2069888	-0.45283	0.0038	2R_2131472_SNP	0.1053	2.10922e-06	0.001349	0.00138889	SiteClass[FBgn0033075|Pld|INTRON|0],TranscriptAnnot[INTRON(MODIFIER||||1278|Pld|protein_coding|CODING|FBtr0085995|1|1);INTRON(MODIFIER||||1278|Pld|protein_coding|CODING|FBtr0085996|1|1);INTRON(MODIFIER||||1278|Pld|protein_coding|CODING|FBtr0085997|2|1)]	Body Weight	-0.03016	0.8554	0.326787
Body Weight	2-stearoyl-GPE (18:0)*	41220	-0.40131	0.0103	FBgn0263258	X:17566491-17592763	-0.45142	0.0039	2R_3928578_SNP	0.25	7.16534e-06	0.0007368	0.00108696	SiteClass[FBgn0025360|Optix|INTRON|0],TranscriptAnnot[UTR_5_PRIME(MODIFIER||148||259|Optix|protein_coding|CODING|FBtr0088866|1|1);INTRON(MODIFIER||||487|Optix|protein_coding|CODING|FBtr0088865|3|1);INTRON(MODIFIER||||492|Optix|protein_coding|CODING|FBtr0329885|3|1)]	Body Weight	-0.04282	0.7958	0.0487847
Body Weight	histamine	1574	-0.38248	0.0149	FBgn0013469	3L:10974271-11002288	0.47118	0.0025	2R_4172704_SNP	0.3636	2.25224e-06	0.001144	0.00172414	SiteClass[|||],TranscriptAnnot[INTERGENIC(MODIFIER||||||||||1)]	Body Weight	0.0085	0.959	0.0445539
Body Weight	histamine	1574	-0.38248	0.0149	XLOC_011948	2RHet:1297603-1303198	0.56389	0.0002	2R_4172704_SNP	0.3636	2.25224e-06	0.001676	0.00172414	SiteClass[|||],TranscriptAnnot[INTERGENIC(MODIFIER||||||||||1)]	Body Weight	-0.25781	0.1131	0.0445539
Body Weight	histamine	1574	-0.38248	0.0149	FBgn0032260	2L:10489900-10491454	-0.46865	0.0026	2R_4172704_SNP	0.3636	2.25224e-06	0.0004436	0.00172414	SiteClass[|||],TranscriptAnnot[INTERGENIC(MODIFIER||||||||||1)]	Body Weight	0.08826	0.5931	0.0445539
Body Weight	histamine	1574	-0.38248	0.0149	XLOC_017830	3L:15931447-15935182	0.49162	0.0015	2R_4172704_SNP	0.3636	2.25224e-06	0.0007955	0.00172414	SiteClass[|||],TranscriptAnnot[INTERGENIC(MODIFIER||||||||||1)]	Body Weight	-0.05071	0.7592	0.0445539
Body Weight	histamine	1574	-0.38248	0.0149	FBgn0031150	X:20924990-20953418	-0.50013	0.0012	2R_4172704_SNP	0.3636	2.25224e-06	0.0005378	0.00172414	SiteClass[|||],TranscriptAnnot[INTERGENIC(MODIFIER||||||||||1)]	Body Weight	0.14717	0.3713	0.0445539
Body Weight	histamine	1574	-0.38248	0.0149	FBgn0038830	3R:16649035-16649961	-0.50195	0.0011	2R_4172704_SNP	0.3636	2.25224e-06	0.00136	0.00172414	SiteClass[|||],TranscriptAnnot[INTERGENIC(MODIFIER||||||||||1)]	Body Weight	-0.07227	0.662	0.0445539
Body Weight	histamine	1574	-0.38248	0.0149	FBgn0002036	2L:19114401-19116570	-0.49729	0.0013	2R_4172704_SNP	0.3636	2.25224e-06	0.001666	0.00172414	SiteClass[|||],TranscriptAnnot[INTERGENIC(MODIFIER||||||||||1)]	Body Weight	0.19525	0.2336	0.0445539
Body Weight	1-palmitoyl-2-linoleoyl-GPI (16:0/18:2)	52450	-0.33283	0.0359	FBgn0085419	2R:14427090-14436474	-0.47328	0.0023	2R_6258506_SNP	0.1795	2.65103e-06	0.0003069	0.000617284	SiteClass[FBgn0261698|CG42732|INTRON|0],TranscriptAnnot[INTRON(MODIFIER||||1878|CG42732|protein_coding|CODING|FBtr0303080|2|1);INTRON(MODIFIER||||1774|CG42732|protein_coding|CODING|FBtr0303081|2|1);INTRON(MODIFIER||||1707|CG42732|protein_coding|CODING|FBtr0303083|2|1);INTRON(MODIFIER||||1438|CG42732|protein_coding|CODING|FBtr0305946|2|1);INTRON(MODIFIER||||1742|CG42732|protein_coding|CODING|FBtr0…	Body Weight	-0.033	0.8419	0.296722
Body Weight	1-palmitoyl-GPG (16:0)*	45970	-0.36529	0.0205	XLOC_015512	3L:23992514-23993799	-0.57874	0.0001	2R_6279259_SNP	0.4359	1.68717e-06	0.0001151	0.00166667	SiteClass[FBgn0261698|CG42732|INTRON|0],TranscriptAnnot[INTRON(MODIFIER||||1707|CG42732|protein_coding|CODING|FBtr0303083|2|1);INTRON(MODIFIER||||1438|CG42732|protein_coding|CODING|FBtr0305946|2|1);INTRON(MODIFIER||||1742|CG42732|protein_coding|CODING|FBtr0329869|2|1|WARNING_TRANSCRIPT_MULTIPLE_STOP_CODONS);INTRON(MODIFIER||||1727|CG42732|protein_coding|CODING|FBtr0330616|2|1);INTRON(MODIFIER||||…	Body Weight	0.12098	0.4632	0.000917436
Body Weight	1-(1-enyl-stearoyl)-GPE (P-18:0)*	39271	-0.39024	0.0128	FBgn0028372	2R:15558123-15560982	0.45142	0.0039	2R_7064260_SNP	0.2821	7.57544e-07	0.001803	0.00555556	SiteClass[FBgn0003396|shn|INTRON|0],TranscriptAnnot[INTRON(MODIFIER||||2532|shn|protein_coding|CODING|FBtr0330619|1|1);INTRON(MODIFIER||||2577|shn|protein_coding|CODING|FBtr0088101|1|1);INTRON(MODIFIER||||2587|shn|protein_coding|CODING|FBtr0330620|1|1)]	Body Weight	0.11367	0.4908	0.0157266
Body Weight	1-(1-enyl-stearoyl)-GPE (P-18:0)*	39271	-0.39024	0.0128	XLOC_018870	3L:23605963-23612500	0.52227	0.0006	2R_7064260_SNP	0.2821	7.57544e-07	0.002608	0.00555556	SiteClass[FBgn0003396|shn|INTRON|0],TranscriptAnnot[INTRON(MODIFIER||||2532|shn|protein_coding|CODING|FBtr0330619|1|1);INTRON(MODIFIER||||2577|shn|protein_coding|CODING|FBtr0088101|1|1);INTRON(MODIFIER||||2587|shn|protein_coding|CODING|FBtr0330620|1|1)]	Body Weight	-0.29232	0.0709	0.0157266
Body Weight	1-(1-enyl-stearoyl)-GPE (P-18:0)*	39271	-0.39024	0.0128	FBgn0036727	3L:17463227-17467617	-0.54858	0.0003	2R_7064260_SNP	0.2821	7.57544e-07	0.002042	0.00555556	SiteClass[FBgn0003396|shn|INTRON|0],TranscriptAnnot[INTRON(MODIFIER||||2532|shn|protein_coding|CODING|FBtr0330619|1|1);INTRON(MODIFIER||||2577|shn|protein_coding|CODING|FBtr0088101|1|1);INTRON(MODIFIER||||2587|shn|protein_coding|CODING|FBtr0330620|1|1)]	Body Weight	-0.07814	0.6363	0.0157266
Body Weight	1-palmitoyl-2-palmitoleoyl-GPC (16:0/16:1)*	52470	-0.34578	0.0289	FBgn0033543	2R:6617083-6619033	0.49089	0.0015	2R_7205755_SNP	0.1892	6.99997e-06	0.0004637	0.000555556	SiteClass[FBgn0016047|nompA|INTRON|0],TranscriptAnnot[UPSTREAM(MODIFIER||641||1557|nompA|protein_coding|CODING|FBtr0089379||1);UPSTREAM(MODIFIER||641||1549|nompA|protein_coding|CODING|FBtr0089382||1);INTRON(MODIFIER||||1549|nompA|protein_coding|CODING|FBtr0089380|1|1);INTRON(MODIFIER||||1557|nompA|protein_coding|CODING|FBtr0089381|1|1);INTRON(MODIFIER||||1306|nompA|protein_coding|CODING|FBtr03394…	Body Weight	-0.15466	0.3472	0.427992
Body Weight	1-palmitoyl-2-linoleoyl-GPI (16:0/18:2)	52450	-0.33283	0.0359	FBgn0033543	2R:6617083-6619033	0.59595	<.0001	2R_7205755_SNP	0.1892	1.24573e-06	0.0004637	0.000617284	SiteClass[FBgn0016047|nompA|INTRON|0],TranscriptAnnot[UPSTREAM(MODIFIER||641||1557|nompA|protein_coding|CODING|FBtr0089379||1);UPSTREAM(MODIFIER||641||1549|nompA|protein_coding|CODING|FBtr0089382||1);INTRON(MODIFIER||||1549|nompA|protein_coding|CODING|FBtr0089380|1|1);INTRON(MODIFIER||||1557|nompA|protein_coding|CODING|FBtr0089381|1|1);INTRON(MODIFIER||||1306|nompA|protein_coding|CODING|FBtr03394…	Body Weight	-0.15466	0.3472	0.427992
Body Weight	1-palmitoyl-2-linoleoyl-GPI (16:0/18:2)	52450	-0.33283	0.0359	FBgn0020385	3R:6522256-6529038	0.48684	0.0017	2R_7205755_SNP	0.1892	1.24573e-06	0.0004613	0.000617284	SiteClass[FBgn0016047|nompA|INTRON|0],TranscriptAnnot[UPSTREAM(MODIFIER||641||1557|nompA|protein_coding|CODING|FBtr0089379||1);UPSTREAM(MODIFIER||641||1549|nompA|protein_coding|CODING|FBtr0089382||1);INTRON(MODIFIER||||1549|nompA|protein_coding|CODING|FBtr0089380|1|1);INTRON(MODIFIER||||1557|nompA|protein_coding|CODING|FBtr0089381|1|1);INTRON(MODIFIER||||1306|nompA|protein_coding|CODING|FBtr03394…	Body Weight	-0.1495	0.3637	0.427992
Body Weight	1-palmitoyl-2-linoleoyl-GPI (16:0/18:2)	52450	-0.33283	0.0359	FBgn0033543	2R:6617083-6619033	0.59595	<.0001	2R_7205788_SNP	0.1842	1.44743e-06	0.0004489	0.000617284	SiteClass[FBgn0016047|nompA|INTRON|0],TranscriptAnnot[UPSTREAM(MODIFIER||674||1557|nompA|protein_coding|CODING|FBtr0089379||1);UPSTREAM(MODIFIER||674||1549|nompA|protein_coding|CODING|FBtr0089382||1);INTRON(MODIFIER||||1549|nompA|protein_coding|CODING|FBtr0089380|1|1);INTRON(MODIFIER||||1557|nompA|protein_coding|CODING|FBtr0089381|1|1);INTRON(MODIFIER||||1306|nompA|protein_coding|CODING|FBtr03394…	Body Weight	-0.15466	0.3472	0.221498
Body Weight	1-palmitoyl-2-linoleoyl-GPI (16:0/18:2)	52450	-0.33283	0.0359	FBgn0040606	3R:22250420-22250827	0.45931	0.0033	2R_7205788_SNP	0.1842	1.44743e-06	0.0003983	0.000617284	SiteClass[FBgn0016047|nompA|INTRON|0],TranscriptAnnot[UPSTREAM(MODIFIER||674||1557|nompA|protein_coding|CODING|FBtr0089379||1);UPSTREAM(MODIFIER||674||1549|nompA|protein_coding|CODING|FBtr0089382||1);INTRON(MODIFIER||||1549|nompA|protein_coding|CODING|FBtr0089380|1|1);INTRON(MODIFIER||||1557|nompA|protein_coding|CODING|FBtr0089381|1|1);INTRON(MODIFIER||||1306|nompA|protein_coding|CODING|FBtr03394…	Body Weight	-0.12602	0.4446	0.221498
Body Weight	1-palmitoyl-2-linoleoyl-GPI (16:0/18:2)	52450	-0.33283	0.0359	FBgn0020385	3R:6522256-6529038	0.48684	0.0017	2R_7205788_SNP	0.1842	1.44743e-06	0.0005172	0.000617284	SiteClass[FBgn0016047|nompA|INTRON|0],TranscriptAnnot[UPSTREAM(MODIFIER||674||1557|nompA|protein_coding|CODING|FBtr0089379||1);UPSTREAM(MODIFIER||674||1549|nompA|protein_coding|CODING|FBtr0089382||1);INTRON(MODIFIER||||1549|nompA|protein_coding|CODING|FBtr0089380|1|1);INTRON(MODIFIER||||1557|nompA|protein_coding|CODING|FBtr0089381|1|1);INTRON(MODIFIER||||1306|nompA|protein_coding|CODING|FBtr03394…	Body Weight	-0.1495	0.3637	0.221498
Body Weight	1-palmitoyl-2-palmitoleoyl-GPC (16:0/16:1)*	52470	-0.34578	0.0289	FBgn0002719	3R:8538825-8548164	0.54211	0.0004	2R_7205835_SNP	0.1389	9.14683e-07	0.0005082	0.000555556	SiteClass[FBgn0016047|nompA|INTRON|0],TranscriptAnnot[UPSTREAM(MODIFIER||721||1557|nompA|protein_coding|CODING|FBtr0089379||1);UPSTREAM(MODIFIER||721||1549|nompA|protein_coding|CODING|FBtr0089382||1);INTRON(MODIFIER||||1549|nompA|protein_coding|CODING|FBtr0089380|1|1);INTRON(MODIFIER||||1557|nompA|protein_coding|CODING|FBtr0089381|1|1);INTRON(MODIFIER||||1306|nompA|protein_coding|CODING|FBtr03394…	Body Weight	-0.11104	0.501	0.223993
Body Weight	1-palmitoyl-2-linoleoyl-GPI (16:0/18:2)	52450	-0.33283	0.0359	FBgn0033543	2R:6617083-6619033	0.59595	<.0001	2R_7205835_SNP	0.1389	1.82485e-07	4.594e-05	0.000617284	SiteClass[FBgn0016047|nompA|INTRON|0],TranscriptAnnot[UPSTREAM(MODIFIER||721||1557|nompA|protein_coding|CODING|FBtr0089379||1);UPSTREAM(MODIFIER||721||1549|nompA|protein_coding|CODING|FBtr0089382||1);INTRON(MODIFIER||||1549|nompA|protein_coding|CODING|FBtr0089380|1|1);INTRON(MODIFIER||||1557|nompA|protein_coding|CODING|FBtr0089381|1|1);INTRON(MODIFIER||||1306|nompA|protein_coding|CODING|FBtr03394…	Body Weight	-0.15466	0.3472	0.223993
Body Weight	1-palmitoyl-2-linoleoyl-GPI (16:0/18:2)	52450	-0.33283	0.0359	FBgn0040606	3R:22250420-22250827	0.45931	0.0033	2R_7205835_SNP	0.1389	1.82485e-07	6.458e-05	0.000617284	SiteClass[FBgn0016047|nompA|INTRON|0],TranscriptAnnot[UPSTREAM(MODIFIER||721||1557|nompA|protein_coding|CODING|FBtr0089379||1);UPSTREAM(MODIFIER||721||1549|nompA|protein_coding|CODING|FBtr0089382||1);INTRON(MODIFIER||||1549|nompA|protein_coding|CODING|FBtr0089380|1|1);INTRON(MODIFIER||||1557|nompA|protein_coding|CODING|FBtr0089381|1|1);INTRON(MODIFIER||||1306|nompA|protein_coding|CODING|FBtr03394…	Body Weight	-0.12602	0.4446	0.223993
Body Weight	1-palmitoyl-2-palmitoleoyl-GPC (16:0/16:1)*	52470	-0.34578	0.0289	FBgn0058298	3L:23719929-23721089	-0.49372	0.0014	2R_7205835_SNP	0.1389	9.14683e-07	0.0004368	0.000555556	SiteClass[FBgn0016047|nompA|INTRON|0],TranscriptAnnot[UPSTREAM(MODIFIER||721||1557|nompA|protein_coding|CODING|FBtr0089379||1);UPSTREAM(MODIFIER||721||1549|nompA|protein_coding|CODING|FBtr0089382||1);INTRON(MODIFIER||||1549|nompA|protein_coding|CODING|FBtr0089380|1|1);INTRON(MODIFIER||||1557|nompA|protein_coding|CODING|FBtr0089381|1|1);INTRON(MODIFIER||||1306|nompA|protein_coding|CODING|FBtr03394…	Body Weight	0.2985	0.0649	0.223993
Body Weight	1-palmitoyl-2-linoleoyl-GPI (16:0/18:2)	52450	-0.33283	0.0359	FBgn0020385	3R:6522256-6529038	0.48684	0.0017	2R_7205835_SNP	0.1389	1.82485e-07	4.84e-06	0.000617284	SiteClass[FBgn0016047|nompA|INTRON|0],TranscriptAnnot[UPSTREAM(MODIFIER||721||1557|nompA|protein_coding|CODING|FBtr0089379||1);UPSTREAM(MODIFIER||721||1549|nompA|protein_coding|CODING|FBtr0089382||1);INTRON(MODIFIER||||1549|nompA|protein_coding|CODING|FBtr0089380|1|1);INTRON(MODIFIER||||1557|nompA|protein_coding|CODING|FBtr0089381|1|1);INTRON(MODIFIER||||1306|nompA|protein_coding|CODING|FBtr03394…	Body Weight	-0.1495	0.3637	0.223993
Body Weight	1-palmitoyl-2-palmitoleoyl-GPC (16:0/16:1)*	52470	-0.34578	0.0289	FBgn0033543	2R:6617083-6619033	0.49089	0.0015	2R_7205835_SNP	0.1389	9.14683e-07	4.594e-05	0.000555556	SiteClass[FBgn0016047|nompA|INTRON|0],TranscriptAnnot[UPSTREAM(MODIFIER||721||1557|nompA|protein_coding|CODING|FBtr0089379||1);UPSTREAM(MODIFIER||721||1549|nompA|protein_coding|CODING|FBtr0089382||1);INTRON(MODIFIER||||1549|nompA|protein_coding|CODING|FBtr0089380|1|1);INTRON(MODIFIER||||1557|nompA|protein_coding|CODING|FBtr0089381|1|1);INTRON(MODIFIER||||1306|nompA|protein_coding|CODING|FBtr03394…	Body Weight	-0.15466	0.3472	0.223993
Body Weight	1-palmitoyl-2-linoleoyl-GPI (16:0/18:2)	52450	-0.33283	0.0359	FBgn0002719	3R:8538825-8548164	0.483	0.0018	2R_7205835_SNP	0.1389	1.82485e-07	0.0005082	0.000617284	SiteClass[FBgn0016047|nompA|INTRON|0],TranscriptAnnot[UPSTREAM(MODIFIER||721||1557|nompA|protein_coding|CODING|FBtr0089379||1);UPSTREAM(MODIFIER||721||1549|nompA|protein_coding|CODING|FBtr0089382||1);INTRON(MODIFIER||||1549|nompA|protein_coding|CODING|FBtr0089380|1|1);INTRON(MODIFIER||||1557|nompA|protein_coding|CODING|FBtr0089381|1|1);INTRON(MODIFIER||||1306|nompA|protein_coding|CODING|FBtr03394…	Body Weight	-0.11104	0.501	0.223993
Body Weight	1-palmitoyl-2-linoleoyl-GPI (16:0/18:2)	52450	-0.33283	0.0359	FBgn0002719	3R:8538825-8548164	0.483	0.0018	2R_7206103_SNP	0.125	3.28269e-06	0.0002581	0.000617284	SiteClass[FBgn0016047|nompA|UPSTREAM|989],TranscriptAnnot[UTR_5_PRIME(MODIFIER||1105||1306|nompA|protein_coding|CODING|FBtr0339483|1|1);UTR_5_PRIME(MODIFIER||1105||1557|nompA|protein_coding|CODING|FBtr0089381|1|1);UTR_5_PRIME(MODIFIER||1105||1549|nompA|protein_coding|CODING|FBtr0089380|1|1);UPSTREAM(MODIFIER||989||1557|nompA|protein_coding|CODING|FBtr0089379||1);UPSTREAM(MODIFIER||989||1549|nompA…	Body Weight	-0.11104	0.501	0.555396
Body Weight	1-palmitoyl-2-palmitoleoyl-GPC (16:0/16:1)*	52470	-0.34578	0.0289	FBgn0002719	3R:8538825-8548164	0.54211	0.0004	2R_7206103_SNP	0.125	4.27748e-07	0.0002581	0.000555556	SiteClass[FBgn0016047|nompA|UPSTREAM|989],TranscriptAnnot[UTR_5_PRIME(MODIFIER||1105||1306|nompA|protein_coding|CODING|FBtr0339483|1|1);UTR_5_PRIME(MODIFIER||1105||1557|nompA|protein_coding|CODING|FBtr0089381|1|1);UTR_5_PRIME(MODIFIER||1105||1549|nompA|protein_coding|CODING|FBtr0089380|1|1);UPSTREAM(MODIFIER||989||1557|nompA|protein_coding|CODING|FBtr0089379||1);UPSTREAM(MODIFIER||989||1549|nompA…	Body Weight	-0.11104	0.501	0.555396
Body Weight	1-stearoyl-2-linoleoyl-GPC (18:0/18:2)*	52452	-0.37242	0.018	FBgn0058298	3L:23719929-23721089	-0.46964	0.0026	2R_7220030_SNP	0.4474	8.07017e-06	0.001849	0.0025	SiteClass[FBgn0003382|sha|SYNONYMOUS_CODING|0],TranscriptAnnot[SYNONYMOUS_CODING(LOW|SILENT|ttC/ttT|F519|1633|sha|protein_coding|CODING|FBtr0273343|10|1);SYNONYMOUS_CODING(LOW|SILENT|ttC/ttT|F512|1626|sha|protein_coding|CODING|FBtr0088120|8|1);SYNONYMOUS_CODING(LOW|SILENT|ttC/ttT|F504|1618|sha|protein_coding|CODING|FBtr0332463|8|1)]	Body Weight	0.2985	0.0649	0.184494
Body Weight	histamine	1574	-0.38248	0.0149	XLOC_017830	3L:15931447-15935182	0.49162	0.0015	2R_9150716_SNP	0.125	4.74457e-06	0.001169	0.00172414	SiteClass[FBgn0259219|CG42319|INTRON|0],TranscriptAnnot[INTRON(MODIFIER||||131|CG42319|protein_coding|CODING|FBtr0299736|3|1);INTRON(MODIFIER||||131|CG42319|protein_coding|CODING|FBtr0299737|3|1);INTRON(MODIFIER||||131|CG42319|protein_coding|CODING|FBtr0299738|2|1);INTRON(MODIFIER||||251|CG42319|protein_coding|CODING|FBtr0299739|4|1);INTRON(MODIFIER||||452|CG42319|protein_coding|CODING|FBtr029974…	Body Weight	-0.05071	0.7592	0.316588
Body Weight	histamine	1574	-0.38248	0.0149	FBgn0038830	3R:16649035-16649961	-0.50195	0.0011	2R_9150716_SNP	0.125	4.74457e-06	9.39e-05	0.00172414	SiteClass[FBgn0259219|CG42319|INTRON|0],TranscriptAnnot[INTRON(MODIFIER||||131|CG42319|protein_coding|CODING|FBtr0299736|3|1);INTRON(MODIFIER||||131|CG42319|protein_coding|CODING|FBtr0299737|3|1);INTRON(MODIFIER||||131|CG42319|protein_coding|CODING|FBtr0299738|2|1);INTRON(MODIFIER||||251|CG42319|protein_coding|CODING|FBtr0299739|4|1);INTRON(MODIFIER||||452|CG42319|protein_coding|CODING|FBtr029974…	Body Weight	-0.07227	0.662	0.316588
Body Weight	histamine	1574	-0.38248	0.0149	XLOC_011947	2RHet:1285029-1285725	0.49496	0.0014	2R_9150716_SNP	0.125	4.74457e-06	0.001436	0.00172414	SiteClass[FBgn0259219|CG42319|INTRON|0],TranscriptAnnot[INTRON(MODIFIER||||131|CG42319|protein_coding|CODING|FBtr0299736|3|1);INTRON(MODIFIER||||131|CG42319|protein_coding|CODING|FBtr0299737|3|1);INTRON(MODIFIER||||131|CG42319|protein_coding|CODING|FBtr0299738|2|1);INTRON(MODIFIER||||251|CG42319|protein_coding|CODING|FBtr0299739|4|1);INTRON(MODIFIER||||452|CG42319|protein_coding|CODING|FBtr029974…	Body Weight	-0.28837	0.075	0.316588
Body Weight	gamma-glutamylisoleucine*	34456	-0.34508	0.0292	FBgn0033756	2R:8513313-8516124	-0.46626	0.0028	2R_9273818_SNP	0.2308	6.33741e-06	0.0004412	0.000833333	SiteClass[|||],TranscriptAnnot[INTERGENIC(MODIFIER||||||||||1)]	Body Weight	0.20001	0.2222	0.852127
Body Weight	gamma-glutamylisoleucine*	34456	-0.34508	0.0292	FBgn0015808	2L:18831229-18833630	-0.5119	0.0009	3L_10565248_SNP	0.1892	1.77263e-06	0.000133	0.000833333	SiteClass[FBgn0052062|A2bp1|INTRON|0],TranscriptAnnot[INTRON(MODIFIER||||547|A2bp1|protein_coding|CODING|FBtr0332985|2|1);INTRON(MODIFIER||||865|A2bp1|protein_coding|CODING|FBtr0113418|3|1);INTRON(MODIFIER||||763|A2bp1|protein_coding|CODING|FBtr0113419|3|1);INTRON(MODIFIER||||858|A2bp1|protein_coding|CODING|FBtr0305097|3|1);INTRON(MODIFIER||||962|A2bp1|protein_coding|CODING|FBtr0305093|4|1);INTRO…	Body Weight	-0.20699	0.2061	0.360133
Body Weight	gamma-glutamylisoleucine*	34456	-0.34508	0.0292	FBgn0034128	2R:12330716-12332350	-0.49309	0.0014	3L_10565248_SNP	0.1892	1.77263e-06	0.0008058	0.000833333	SiteClass[FBgn0052062|A2bp1|INTRON|0],TranscriptAnnot[INTRON(MODIFIER||||547|A2bp1|protein_coding|CODING|FBtr0332985|2|1);INTRON(MODIFIER||||865|A2bp1|protein_coding|CODING|FBtr0113418|3|1);INTRON(MODIFIER||||763|A2bp1|protein_coding|CODING|FBtr0113419|3|1);INTRON(MODIFIER||||858|A2bp1|protein_coding|CODING|FBtr0305097|3|1);INTRON(MODIFIER||||962|A2bp1|protein_coding|CODING|FBtr0305093|4|1);INTRO…	Body Weight	-0.04302	0.7948	0.360133
Body Weight	2-stearoyl-GPE (18:0)*	41220	-0.40131	0.0103	XLOC_006323	2R:498734-503609	-0.48664	0.0017	3L_10690366_SNP	0.1176	6.2632e-06	0.001023	0.00108696	SiteClass[FBgn0036101|NijA|UPSTREAM|389],TranscriptAnnot[UPSTREAM(MODIFIER||389||241|NijA|protein_coding|CODING|FBtr0089569||1);UPSTREAM(MODIFIER||389||245|NijA|protein_coding|CODING|FBtr0089570||1);UPSTREAM(MODIFIER||389||229|NijA|protein_coding|CODING|FBtr0089571||1);UPSTREAM(MODIFIER||389||225|NijA|protein_coding|CODING|FBtr0331575||1);INTERGENIC(MODIFIER||||||||||1)]	Body Weight	0.0665	0.6875	0.202995
Body Weight	2-stearoyl-GPE (18:0)*	41220	-0.40131	0.0103	XLOC_027415	U:8561290-8680119	0.5168	0.0008	3L_10690366_SNP	0.1176	6.2632e-06	2.044e-05	0.00108696	SiteClass[FBgn0036101|NijA|UPSTREAM|389],TranscriptAnnot[UPSTREAM(MODIFIER||389||241|NijA|protein_coding|CODING|FBtr0089569||1);UPSTREAM(MODIFIER||389||245|NijA|protein_coding|CODING|FBtr0089570||1);UPSTREAM(MODIFIER||389||229|NijA|protein_coding|CODING|FBtr0089571||1);UPSTREAM(MODIFIER||389||225|NijA|protein_coding|CODING|FBtr0331575||1);INTERGENIC(MODIFIER||||||||||1)]	Body Weight	-0.02095	0.8993	0.202995
Body Weight	2-stearoyl-GPE (18:0)*	41220	-0.40131	0.0103	FBgn0029093	2R:3709616-3711074	-0.48482	0.0018	3L_10690366_SNP	0.1176	6.2632e-06	0.0007119	0.00108696	SiteClass[FBgn0036101|NijA|UPSTREAM|389],TranscriptAnnot[UPSTREAM(MODIFIER||389||241|NijA|protein_coding|CODING|FBtr0089569||1);UPSTREAM(MODIFIER||389||245|NijA|protein_coding|CODING|FBtr0089570||1);UPSTREAM(MODIFIER||389||229|NijA|protein_coding|CODING|FBtr0089571||1);UPSTREAM(MODIFIER||389||225|NijA|protein_coding|CODING|FBtr0331575||1);INTERGENIC(MODIFIER||||||||||1)]	Body Weight	0.19809	0.2267	0.202995
Body Weight	histamine	1574	-0.38248	0.0149	FBgn0039326	3R:21146775-21148479	-0.47634	0.0022	3L_1076759_SNP	0.125	9.79883e-06	0.001135	0.00172414	SiteClass[FBgn0004870|bab1|INTRON|0],TranscriptAnnot[INTRON(MODIFIER||||977|bab1|protein_coding|CODING|FBtr0072642|1|1);INTRON(MODIFIER||||970|bab1|protein_coding|CODING|FBtr0333268|1|1);INTRON(MODIFIER||||971|bab1|protein_coding|CODING|FBtr0333269|1|1);INTRON(MODIFIER||||976|bab1|protein_coding|CODING|FBtr0333270|1|1)]	Body Weight	0.06346	0.7011	0.398155
Body Weight	histamine	1574	-0.38248	0.0149	XLOC_017830	3L:15931447-15935182	0.49162	0.0015	3L_10972015_SNP	0.1053	8.20127e-07	0.000898	0.00172414	SiteClass[FBgn0267309|CR45745|UPSTREAM|613],TranscriptAnnot[UPSTREAM(MODIFIER||613|||CR45745|ncRNA|NON_CODING|FBtr0346564||1);INTERGENIC(MODIFIER||||||||||1)]	Body Weight	-0.05071	0.7592	0.463393
Body Weight	histamine	1574	-0.38248	0.0149	FBgn0039326	3R:21146775-21148479	-0.47634	0.0022	3L_10972015_SNP	0.1053	8.20127e-07	0.001112	0.00172414	SiteClass[FBgn0267309|CR45745|UPSTREAM|613],TranscriptAnnot[UPSTREAM(MODIFIER||613|||CR45745|ncRNA|NON_CODING|FBtr0346564||1);INTERGENIC(MODIFIER||||||||||1)]	Body Weight	0.06346	0.7011	0.463393
Body Weight	histamine	1574	-0.38248	0.0149	XLOC_011947	2RHet:1285029-1285725	0.49496	0.0014	3L_10972015_SNP	0.1053	8.20127e-07	0.001169	0.00172414	SiteClass[FBgn0267309|CR45745|UPSTREAM|613],TranscriptAnnot[UPSTREAM(MODIFIER||613|||CR45745|ncRNA|NON_CODING|FBtr0346564||1);INTERGENIC(MODIFIER||||||||||1)]	Body Weight	-0.28837	0.075	0.463393
Body Weight	histamine	1574	-0.38248	0.0149	FBgn0034725	2R:18291682-18296045	-0.45832	0.0033	3L_10972015_SNP	0.1053	8.20127e-07	0.0009948	0.00172414	SiteClass[FBgn0267309|CR45745|UPSTREAM|613],TranscriptAnnot[UPSTREAM(MODIFIER||613|||CR45745|ncRNA|NON_CODING|FBtr0346564||1);INTERGENIC(MODIFIER||||||||||1)]	Body Weight	-0.11387	0.49	0.463393
Body Weight	2-stearoyl-GPE (18:0)*	41220	-0.40131	0.0103	FBgn0038450	3R:12443672-12445600	-0.50547	0.001	3L_11452792_DEL	0.1714	6.30515e-06	0.000124	0.00108696	SiteClass[FBgn0036161|CG7551|DOWNSTREAM|68],TranscriptAnnot[DOWNSTREAM(MODIFIER||68||322|CG7551|protein_coding|CODING|FBtr0076176||1);INTERGENIC(MODIFIER||||||||||1)]	Body Weight	0.26874	0.0981	0.0480462
Body Weight	2-stearoyl-GPE (18:0)*	41220	-0.40131	0.0103	XLOC_027415	U:8561290-8680119	0.5168	0.0008	3L_11452792_DEL	0.1714	6.30515e-06	1.686e-05	0.00108696	SiteClass[FBgn0036161|CG7551|DOWNSTREAM|68],TranscriptAnnot[DOWNSTREAM(MODIFIER||68||322|CG7551|protein_coding|CODING|FBtr0076176||1);INTERGENIC(MODIFIER||||||||||1)]	Body Weight	-0.02095	0.8993	0.0480462
Body Weight	gamma-glutamylglutamine	2730	-0.33884	0.0325	FBgn0020415	2L:16447330-16450508	0.46619	0.0028	3L_11866058_SNP	0.1143	4.83333e-07	0.002707	0.00357143	SiteClass[FBgn0266100|CG44837|INTRON|0],TranscriptAnnot[INTRON(MODIFIER||||964|CG44837|protein_coding|CODING|FBtr0343552|2|1)]	Body Weight	-0.17622	0.2832	0.689292
Body Weight	gamma-glutamylglutamine	2730	-0.33884	0.0325	FBgn0036787	3L:18455057-18456263	-0.7166	<.0001	3L_11866058_SNP	0.1143	4.83333e-07	0.0001529	0.00357143	SiteClass[FBgn0266100|CG44837|INTRON|0],TranscriptAnnot[INTRON(MODIFIER||||964|CG44837|protein_coding|CODING|FBtr0343552|2|1)]	Body Weight	0.1909	0.2444	0.689292
Body Weight	1-palmitoyl-2-linoleoyl-GPI (16:0/18:2)	52450	-0.33283	0.0359	FBgn0085419	2R:14427090-14436474	-0.47328	0.0023	3L_12068716_SNP	0.1026	6.21013e-06	0.0003941	0.000617284	SiteClass[FBgn0250876|Sema-5c|INTRON|0],TranscriptAnnot[INTRON(MODIFIER||||1093|Sema-5c|protein_coding|CODING|FBtr0076052|3|1);INTRON(MODIFIER||||1091|Sema-5c|protein_coding|CODING|FBtr0300339|3|1)]	Body Weight	-0.033	0.8419	0.0820217
Body Weight	histamine	1574	-0.38248	0.0149	XLOC_017830	3L:15931447-15935182	0.49162	0.0015	3L_12199028_SNP	0.125	6.45368e-06	0.0003627	0.00172414	SiteClass[FBgn0036266|CG5626|INTRON|0;FBgn0260941|app|DOWNSTREAM|310],TranscriptAnnot[DOWNSTREAM(MODIFIER||310||693|app|protein_coding|CODING|FBtr0301056||1);DOWNSTREAM(MODIFIER||310||693|app|protein_coding|CODING|FBtr0301057||1);DOWNSTREAM(MODIFIER||310||382|app|protein_coding|CODING|FBtr0304661||1);DOWNSTREAM(MODIFIER||310||693|app|protein_coding|CODING|FBtr0334102||1);DOWNSTREAM(MODIFIER||310|…	Body Weight	-0.05071	0.7592	0.0793062
Body Weight	histamine	1574	-0.38248	0.0149	FBgn0036266	3L:12197223-12199122	-0.45377	0.0037	3L_12199028_SNP	0.125	6.45368e-06	0.0007324	0.00172414	SiteClass[FBgn0036266|CG5626|INTRON|0;FBgn0260941|app|DOWNSTREAM|310],TranscriptAnnot[DOWNSTREAM(MODIFIER||310||693|app|protein_coding|CODING|FBtr0301056||1);DOWNSTREAM(MODIFIER||310||693|app|protein_coding|CODING|FBtr0301057||1);DOWNSTREAM(MODIFIER||310||382|app|protein_coding|CODING|FBtr0304661||1);DOWNSTREAM(MODIFIER||310||693|app|protein_coding|CODING|FBtr0334102||1);DOWNSTREAM(MODIFIER||310|…	Body Weight	0.21469	0.1894	0.0793062
Body Weight	histamine	1574	-0.38248	0.0149	FBgn0031150	X:20924990-20953418	-0.50013	0.0012	3L_12199028_SNP	0.125	6.45368e-06	4.365e-05	0.00172414	SiteClass[FBgn0036266|CG5626|INTRON|0;FBgn0260941|app|DOWNSTREAM|310],TranscriptAnnot[DOWNSTREAM(MODIFIER||310||693|app|protein_coding|CODING|FBtr0301056||1);DOWNSTREAM(MODIFIER||310||693|app|protein_coding|CODING|FBtr0301057||1);DOWNSTREAM(MODIFIER||310||382|app|protein_coding|CODING|FBtr0304661||1);DOWNSTREAM(MODIFIER||310||693|app|protein_coding|CODING|FBtr0334102||1);DOWNSTREAM(MODIFIER||310|…	Body Weight	0.14717	0.3713	0.0793062
Body Weight	histamine	1574	-0.38248	0.0149	FBgn0034725	2R:18291682-18296045	-0.45832	0.0033	3L_12199028_SNP	0.125	6.45368e-06	4.522e-07	0.00172414	SiteClass[FBgn0036266|CG5626|INTRON|0;FBgn0260941|app|DOWNSTREAM|310],TranscriptAnnot[DOWNSTREAM(MODIFIER||310||693|app|protein_coding|CODING|FBtr0301056||1);DOWNSTREAM(MODIFIER||310||693|app|protein_coding|CODING|FBtr0301057||1);DOWNSTREAM(MODIFIER||310||382|app|protein_coding|CODING|FBtr0304661||1);DOWNSTREAM(MODIFIER||310||693|app|protein_coding|CODING|FBtr0334102||1);DOWNSTREAM(MODIFIER||310|…	Body Weight	-0.11387	0.49	0.0793062
Body Weight	histamine	1574	-0.38248	0.0149	FBgn0036549	3L:15961304-15963002	-0.46946	0.0026	3L_12199028_SNP	0.125	6.45368e-06	0.001542	0.00172414	SiteClass[FBgn0036266|CG5626|INTRON|0;FBgn0260941|app|DOWNSTREAM|310],TranscriptAnnot[DOWNSTREAM(MODIFIER||310||693|app|protein_coding|CODING|FBtr0301056||1);DOWNSTREAM(MODIFIER||310||693|app|protein_coding|CODING|FBtr0301057||1);DOWNSTREAM(MODIFIER||310||382|app|protein_coding|CODING|FBtr0304661||1);DOWNSTREAM(MODIFIER||310||693|app|protein_coding|CODING|FBtr0334102||1);DOWNSTREAM(MODIFIER||310|…	Body Weight	0.11225	0.4963	0.0793062
Body Weight	glycerophosphoinositol*	47155	0.36848	0.0193	XLOC_000828	2L:5944992-5945419	-0.45891	0.0033	3L_12966922_SNP	0.1795	7.39256e-06	0.0008947	0.0025	SiteClass[FBgn0036328|CG10749|DOWNSTREAM|172],TranscriptAnnot[DOWNSTREAM(MODIFIER||172||347|CG10749|protein_coding|CODING|FBtr0075871||1);INTERGENIC(MODIFIER||||||||||1)]	Body Weight	0.16347	0.32	0.131907
Body Weight	1-(1-enyl-stearoyl)-GPE (P-18:0)*	39271	-0.39024	0.0128	FBgn0010038	3R:8197693-8198426	0.60081	<.0001	3L_13364824_SNP	0.2	2.02686e-06	0.0001769	0.00555556	SiteClass[|||],TranscriptAnnot[INTERGENIC(MODIFIER||||||||||1)]	Body Weight	-0.21276	0.1935	0.223342
Body Weight	1-(1-enyl-stearoyl)-GPE (P-18:0)*	39271	-0.39024	0.0128	FBgn0031791	2L:6255859-6256822	-0.48482	0.0018	3L_13364824_SNP	0.2	2.02686e-06	0.004117	0.00555556	SiteClass[|||],TranscriptAnnot[INTERGENIC(MODIFIER||||||||||1)]	Body Weight	-0.00385	0.9815	0.223342
Body Weight	1-(1-enyl-stearoyl)-GPE (P-18:0)*	39271	-0.39024	0.0128	FBgn0039809	3R:26707514-26709225	0.46518	0.0028	3L_13364824_SNP	0.2	2.02686e-06	0.001666	0.00555556	SiteClass[|||],TranscriptAnnot[INTERGENIC(MODIFIER||||||||||1)]	Body Weight	-0.12359	0.4535	0.223342
Body Weight	gamma-glutamylisoleucine*	34456	-0.34508	0.0292	FBgn0030629	X:15234406-15236150	-0.47988	0.002	3L_1374563_SNP	0.1176	9.45163e-06	0.0002965	0.000833333	SiteClass[FBgn0003138|Ptp61F|INTRON|0;FBgn0003295|ru|INTRON|0],TranscriptAnnot[INTRON(MODIFIER||||530|Ptp61F|protein_coding|CODING|FBtr0072716|1|1);INTRON(MODIFIER||||431|Ptp61F|protein_coding|CODING|FBtr0310161|3|1);INTRON(MODIFIER||||341|ru|protein_coding|CODING|FBtr0072681|1|1)]	Body Weight	-0.24768	0.1284	0.293633
Body Weight	glycerophosphoinositol*	47155	0.36848	0.0193	FBgn0030449	X:13001415-13002227	-0.47692	0.0021	3L_15293155_DEL	0.1842	4.01264e-06	2.232e-05	0.0025	SiteClass[FBgn0036491|Best4|INTRON|0;FBgn0036492|Best3|DOWNSTREAM|859],TranscriptAnnot[DOWNSTREAM(MODIFIER||859||535|Best3|protein_coding|CODING|FBtr0075618||1);INTRON(MODIFIER||||526|Best4|protein_coding|CODING|FBtr0113172|3|1)]	Body Weight	0.10891	0.5093	0.314375
Body Weight	glycerophosphoinositol*	47155	0.36848	0.0193	FBgn0034218	2R:13327802-13329988	-0.467	0.0027	3L_15294110_SNP	0.2308	2.36988e-07	0.0001769	0.0025	SiteClass[FBgn0036492|Best3|SYNONYMOUS_CODING|0;FBgn0036491|Best4|DOWNSTREAM|68],TranscriptAnnot[SYNONYMOUS_CODING(LOW|SILENT|aaG/aaA|K518|535|Best3|protein_coding|CODING|FBtr0075618|4|1);DOWNSTREAM(MODIFIER||68||526|Best4|protein_coding|CODING|FBtr0113172||1)]	Body Weight	0.00476	0.9771	0.546117
Body Weight	1-stearoyl-GPE (18:0)	42398	-0.38049	0.0154	FBgn0051547	3R:1315227-1328424	0.483	0.0018	3L_1559276_SNP	0.1026	1.48547e-06	0.0007882	0.000943396	SiteClass[FBgn0035233|Pex10|NON_SYNONYMOUS_CODING|0;FBgn0035235|CG7879|DOWNSTREAM|537;FBgn0035232|CG12099|UPSTREAM|792],TranscriptAnnot[NON_SYNONYMOUS_CODING(MODERATE|MISSENSE|Cag/Gag|Q131E|299|Pex10|protein_coding|CODING|FBtr0072743|3|1);NON_SYNONYMOUS_CODING(MODERATE|MISSENSE|Cag/Gag|Q131E|299|Pex10|protein_coding|CODING|FBtr0333397|2|1);UPSTREAM(MODIFIER||792||708|CG12099|protein_coding|CODING…	Body Weight	-0.18766	0.2526	0.243543
Body Weight	2-stearoyl-GPE (18:0)*	41220	-0.40131	0.0103	XLOC_027415	U:8561290-8680119	0.5168	0.0008	3L_15671080_SNP	0.1026	3.8661e-06	0.0004178	0.00108696	SiteClass[|||],TranscriptAnnot[INTERGENIC(MODIFIER||||||||||1)]	Body Weight	-0.02095	0.8993	0.188565
Body Weight	2-stearoyl-GPE (18:0)*	41220	-0.40131	0.0103	FBgn0261563	2L:14263027-14328262	-0.47753	0.0021	3L_15671080_SNP	0.1026	3.8661e-06	0.0009779	0.00108696	SiteClass[|||],TranscriptAnnot[INTERGENIC(MODIFIER||||||||||1)]	Body Weight	0.17126	0.2972	0.188565
Body Weight	2-stearoyl-GPE (18:0)*	41220	-0.40131	0.0103	FBgn0031184	X:21849019-21851327	-0.49069	0.0015	3L_15671080_SNP	0.1026	3.8661e-06	0.0002083	0.00108696	SiteClass[|||],TranscriptAnnot[INTERGENIC(MODIFIER||||||||||1)]	Body Weight	-0.05243	0.7512	0.188565
Body Weight	gamma-glutamylglutamine	2730	-0.33884	0.0325	FBgn0035313	3L:2185930-2187676	-0.45789	0.0034	3L_18079650_SNP	0.1111	7.24948e-08	0.0001576	0.00357143	SiteClass[FBgn0052194|CR32194|EXON|0;FBgn0085282|CG34253|DOWNSTREAM|124],TranscriptAnnot[DOWNSTREAM(MODIFIER||124||112|CG34253|protein_coding|CODING|FBtr0112447||1);EXON(MODIFIER|||||CR32194|ncRNA|NON_CODING|FBtr0306733|2|1)]	Body Weight	0.12055	0.4648	0.21628
Body Weight	gamma-glutamylglutamine	2730	-0.33884	0.0325	FBgn0036787	3L:18455057-18456263	-0.7166	<.0001	3L_18079650_SNP	0.1111	7.24948e-08	0.0002087	0.00357143	SiteClass[FBgn0052194|CR32194|EXON|0;FBgn0085282|CG34253|DOWNSTREAM|124],TranscriptAnnot[DOWNSTREAM(MODIFIER||124||112|CG34253|protein_coding|CODING|FBtr0112447||1);EXON(MODIFIER|||||CR32194|ncRNA|NON_CODING|FBtr0306733|2|1)]	Body Weight	0.1909	0.2444	0.21628
Body Weight	gamma-glutamylglutamine	2730	-0.33884	0.0325	FBgn0001978	2L:15113480-15118069	0.49514	0.0014	3L_18079650_SNP	0.1111	7.24948e-08	0.0002798	0.00357143	SiteClass[FBgn0052194|CR32194|EXON|0;FBgn0085282|CG34253|DOWNSTREAM|124],TranscriptAnnot[DOWNSTREAM(MODIFIER||124||112|CG34253|protein_coding|CODING|FBtr0112447||1);EXON(MODIFIER|||||CR32194|ncRNA|NON_CODING|FBtr0306733|2|1)]	Body Weight	-0.03978	0.81	0.21628
Body Weight	gamma-glutamylglutamine	2730	-0.33884	0.0325	FBgn0001978	2L:15113480-15118069	0.49514	0.0014	3L_18079679_SNP	0.1143	1.06854e-07	0.0003693	0.00357143	SiteClass[FBgn0052194|CR32194|EXON|0;FBgn0085282|CG34253|DOWNSTREAM|95],TranscriptAnnot[DOWNSTREAM(MODIFIER||95||112|CG34253|protein_coding|CODING|FBtr0112447||1);EXON(MODIFIER|||||CR32194|ncRNA|NON_CODING|FBtr0306733|2|1)]	Body Weight	-0.03978	0.81	0.234277
Body Weight	gamma-glutamylglutamine	2730	-0.33884	0.0325	FBgn0036787	3L:18455057-18456263	-0.7166	<.0001	3L_18079679_SNP	0.1143	1.06854e-07	0.0002775	0.00357143	SiteClass[FBgn0052194|CR32194|EXON|0;FBgn0085282|CG34253|DOWNSTREAM|95],TranscriptAnnot[DOWNSTREAM(MODIFIER||95||112|CG34253|protein_coding|CODING|FBtr0112447||1);EXON(MODIFIER|||||CR32194|ncRNA|NON_CODING|FBtr0306733|2|1)]	Body Weight	0.1909	0.2444	0.234277
Body Weight	gamma-glutamylglutamine	2730	-0.33884	0.0325	FBgn0035313	3L:2185930-2187676	-0.45789	0.0034	3L_18079679_SNP	0.1143	1.06854e-07	8.513e-05	0.00357143	SiteClass[FBgn0052194|CR32194|EXON|0;FBgn0085282|CG34253|DOWNSTREAM|95],TranscriptAnnot[DOWNSTREAM(MODIFIER||95||112|CG34253|protein_coding|CODING|FBtr0112447||1);EXON(MODIFIER|||||CR32194|ncRNA|NON_CODING|FBtr0306733|2|1)]	Body Weight	0.12055	0.4648	0.234277
Body Weight	gamma-glutamylisoleucine*	34456	-0.34508	0.0292	FBgn0040297	2L:21104568-21134255	-0.45619	0.0035	3L_18647732_SNP	0.1081	8.53881e-06	0.0002148	0.000833333	SiteClass[FBgn0036801|MYPT-75D|INTRON|0],TranscriptAnnot[INTRON(MODIFIER||||741|MYPT-75D|protein_coding|CODING|FBtr0075049|2|1);INTRON(MODIFIER||||635|MYPT-75D|protein_coding|CODING|FBtr0331420|2|1);INTRON(MODIFIER||||741|MYPT-75D|protein_coding|CODING|FBtr0331421|1|1)]	Body Weight	-0.07308	0.6584	0.00573883
Body Weight	2-stearoyl-GPE (18:0)*	41220	-0.40131	0.0103	XLOC_027415	U:8561290-8680119	0.5168	0.0008	3L_1866979_SNP	0.25	4.70052e-06	7.026e-06	0.00108696	SiteClass[FBgn0035285|CG12025|INTRON|0],TranscriptAnnot[INTRON(MODIFIER||||170|CG12025|protein_coding|CODING|FBtr0072834|1|1);INTRON(MODIFIER||||170|CG12025|protein_coding|CODING|FBtr0332668|1|1);INTRON(MODIFIER||||170|CG12025|protein_coding|CODING|FBtr0345381|1|1)]	Body Weight	-0.02095	0.8993	0.453955
Body Weight	1-palmitoyl-GPG (16:0)*	45970	-0.36529	0.0205	FBgn0036727	3L:17463227-17467617	-0.57713	0.0001	3L_1866979_SNP	0.25	9.64982e-06	8.117e-05	0.00166667	SiteClass[FBgn0035285|CG12025|INTRON|0],TranscriptAnnot[INTRON(MODIFIER||||170|CG12025|protein_coding|CODING|FBtr0072834|1|1);INTRON(MODIFIER||||170|CG12025|protein_coding|CODING|FBtr0332668|1|1);INTRON(MODIFIER||||170|CG12025|protein_coding|CODING|FBtr0345381|1|1)]	Body Weight	-0.07814	0.6363	0.453955
Body Weight	2-stearoyl-GPE (18:0)*	41220	-0.40131	0.0103	FBgn0036727	3L:17463227-17467617	-0.58968	<.0001	3L_1866979_SNP	0.25	4.70052e-06	8.117e-05	0.00108696	SiteClass[FBgn0035285|CG12025|INTRON|0],TranscriptAnnot[INTRON(MODIFIER||||170|CG12025|protein_coding|CODING|FBtr0072834|1|1);INTRON(MODIFIER||||170|CG12025|protein_coding|CODING|FBtr0332668|1|1);INTRON(MODIFIER||||170|CG12025|protein_coding|CODING|FBtr0345381|1|1)]	Body Weight	-0.07814	0.6363	0.453955
Body Weight	2-stearoyl-GPE (18:0)*	41220	-0.40131	0.0103	XLOC_015512	3L:23992514-23993799	-0.48846	0.0016	3L_18690156_SNP	0.1081	3.75077e-06	0.000474	0.00108696	SiteClass[FBgn0036808|Dic4|DOWNSTREAM|13],TranscriptAnnot[UTR_3_PRIME(MODIFIER||107||302|Dic4|protein_coding|CODING|FBtr0334057|4|1);DOWNSTREAM(MODIFIER||13||302|Dic4|protein_coding|CODING|FBtr0075090||1);DOWNSTREAM(MODIFIER||13||173|Dic4|protein_coding|CODING|FBtr0334056||1)]	Body Weight	0.12098	0.4632	0.0391765
Body Weight	2-stearoyl-GPE (18:0)*	41220	-0.40131	0.0103	XLOC_027415	U:8561290-8680119	0.5168	0.0008	3L_18690156_SNP	0.1081	3.75077e-06	6.417e-05	0.00108696	SiteClass[FBgn0036808|Dic4|DOWNSTREAM|13],TranscriptAnnot[UTR_3_PRIME(MODIFIER||107||302|Dic4|protein_coding|CODING|FBtr0334057|4|1);DOWNSTREAM(MODIFIER||13||302|Dic4|protein_coding|CODING|FBtr0075090||1);DOWNSTREAM(MODIFIER||13||173|Dic4|protein_coding|CODING|FBtr0334056||1)]	Body Weight	-0.02095	0.8993	0.0391765
Body Weight	2-stearoyl-GPE (18:0)*	41220	-0.40131	0.0103	XLOC_015512	3L:23992514-23993799	-0.48846	0.0016	3L_18690165_SNP	0.1053	5.06941e-06	0.0003834	0.00108696	SiteClass[FBgn0036808|Dic4|DOWNSTREAM|4],TranscriptAnnot[UTR_3_PRIME(MODIFIER||98||302|Dic4|protein_coding|CODING|FBtr0334057|4|1);DOWNSTREAM(MODIFIER||4||302|Dic4|protein_coding|CODING|FBtr0075090||1);DOWNSTREAM(MODIFIER||4||173|Dic4|protein_coding|CODING|FBtr0334056||1)]	Body Weight	0.12098	0.4632	0.0404121
Body Weight	2-stearoyl-GPE (18:0)*	41220	-0.40131	0.0103	XLOC_027415	U:8561290-8680119	0.5168	0.0008	3L_18690165_SNP	0.1053	5.06941e-06	6.086e-05	0.00108696	SiteClass[FBgn0036808|Dic4|DOWNSTREAM|4],TranscriptAnnot[UTR_3_PRIME(MODIFIER||98||302|Dic4|protein_coding|CODING|FBtr0334057|4|1);DOWNSTREAM(MODIFIER||4||302|Dic4|protein_coding|CODING|FBtr0075090||1);DOWNSTREAM(MODIFIER||4||173|Dic4|protein_coding|CODING|FBtr0334056||1)]	Body Weight	-0.02095	0.8993	0.0404121
Body Weight	gamma-glutamylmethionine	44872	-0.35053	0.0266	FBgn0036787	3L:18455057-18456263	-0.71801	<.0001	3L_18824159_SNP	0.1026	3.80717e-08	0.001603	0.00333333	SiteClass[FBgn0036816|Indy|INTRON|0],TranscriptAnnot[INTRON(MODIFIER||||590|Indy|protein_coding|CODING|FBtr0075081|5|1);INTRON(MODIFIER||||572|Indy|protein_coding|CODING|FBtr0075082|5|1);INTRON(MODIFIER||||572|Indy|protein_coding|CODING|FBtr0075083|5|1);INTRON(MODIFIER||||572|Indy|protein_coding|CODING|FBtr0301857|5|1)]	Body Weight	0.1909	0.2444	0.243083
Body Weight	gamma-glutamylmethionine	44872	-0.35053	0.0266	FBgn0039487	3R:22934189-22937992	-0.45275	0.0038	3L_18824159_SNP	0.1026	3.80717e-08	0.0001406	0.00333333	SiteClass[FBgn0036816|Indy|INTRON|0],TranscriptAnnot[INTRON(MODIFIER||||590|Indy|protein_coding|CODING|FBtr0075081|5|1);INTRON(MODIFIER||||572|Indy|protein_coding|CODING|FBtr0075082|5|1);INTRON(MODIFIER||||572|Indy|protein_coding|CODING|FBtr0075083|5|1);INTRON(MODIFIER||||572|Indy|protein_coding|CODING|FBtr0301857|5|1)]	Body Weight	-0.10669	0.518	0.243083
Body Weight	2-stearoyl-GPE (18:0)*	41220	-0.40131	0.0103	XLOC_027415	U:8561290-8680119	0.5168	0.0008	3L_21103914_SNP	0.2162	9.09323e-06	0.0009203	0.00108696	SiteClass[FBgn0020294|ko|INTRON|0],TranscriptAnnot[INTRON(MODIFIER||||1049|ko|protein_coding|CODING|FBtr0078324|1|1)]	Body Weight	-0.02095	0.8993	0.129851
Body Weight	2-stearoyl-GPE (18:0)*	41220	-0.40131	0.0103	XLOC_028011	Uextra:3177610-3178493	0.53644	0.0004	3L_21194341_SNP	0.1282	5.6261e-06	0.000138	0.00108696	SiteClass[FBgn0053054|CG33054|INTRON|0;FBgn0053056|CG33056|INTRON|0],TranscriptAnnot[UPSTREAM(MODIFIER||553||320|CG33056|protein_coding|CODING|FBtr0078313||1);UPSTREAM(MODIFIER||553||343|CG33056|protein_coding|CODING|FBtr0078314||1);UPSTREAM(MODIFIER||553||343|CG33056|protein_coding|CODING|FBtr0078315||1);INTRON(MODIFIER||||153|CG33054|protein_coding|CODING|FBtr0078317|1|1);INTRON(MODIFIER||||343…	Body Weight	-0.03614	0.8271	0.114962
Body Weight	2-stearoyl-GPE (18:0)*	41220	-0.40131	0.0103	XLOC_028011	Uextra:3177610-3178493	0.53644	0.0004	3L_21252525_SNP	0.125	4.86772e-06	0.0001231	0.00108696	SiteClass[FBgn0004865|Eip78C|INTRON|0;FBgn0262854|CG43218|DOWNSTREAM|667],TranscriptAnnot[DOWNSTREAM(MODIFIER||667||182|CG43218|protein_coding|CODING|FBtr0306159||1);INTRON(MODIFIER||||862|Eip78C|protein_coding|CODING|FBtr0078306|3|1);INTRON(MODIFIER||||862|Eip78C|protein_coding|CODING|FBtr0306157|4|1);INTRON(MODIFIER||||862|Eip78C|protein_coding|CODING|FBtr0306158|4|1);INTRON(MODIFIER||||392|Eip…	Body Weight	-0.03614	0.8271	0.143197
Body Weight	2-stearoyl-GPE (18:0)*	41220	-0.40131	0.0103	XLOC_028011	Uextra:3177610-3178493	0.53644	0.0004	3L_21284758_SNP	0.1389	4.86134e-06	0.0001618	0.00108696	SiteClass[FBgn0037067|Cpr78Ca|DOWNSTREAM|202],TranscriptAnnot[DOWNSTREAM(MODIFIER||202||127|Cpr78Ca|protein_coding|CODING|FBtr0078409||1);INTERGENIC(MODIFIER||||||||||1)]	Body Weight	-0.03614	0.8271	0.129865
Body Weight	2-stearoyl-GPE (18:0)*	41220	-0.40131	0.0103	XLOC_027415	U:8561290-8680119	0.5168	0.0008	3L_21310984_SNP	0.125	3.53993e-06	0.0001217	0.00108696	SiteClass[FBgn0003042|Pc|SYNONYMOUS_CODING|0;FBgn0267234|CR45674|DOWNSTREAM|339;FBgn0086913|Rab26|UPSTREAM|890],TranscriptAnnot[SYNONYMOUS_CODING(LOW|SILENT|aaG/aaA|K9|390|Pc|protein_coding|CODING|FBtr0078405|1|1);UPSTREAM(MODIFIER||890||388|Rab26|protein_coding|CODING|FBtr0112677||1);UPSTREAM(MODIFIER||890||410|Rab26|protein_coding|CODING|FBtr0331794||1);UPSTREAM(MODIFIER||890||388|Rab26|protein…	Body Weight	-0.02095	0.8993	0.0614103
Body Weight	2-stearoyl-GPE (18:0)*	41220	-0.40131	0.0103	FBgn0263258	X:17566491-17592763	-0.45142	0.0039	3L_21310984_SNP	0.125	3.53993e-06	0.0003844	0.00108696	SiteClass[FBgn0003042|Pc|SYNONYMOUS_CODING|0;FBgn0267234|CR45674|DOWNSTREAM|339;FBgn0086913|Rab26|UPSTREAM|890],TranscriptAnnot[SYNONYMOUS_CODING(LOW|SILENT|aaG/aaA|K9|390|Pc|protein_coding|CODING|FBtr0078405|1|1);UPSTREAM(MODIFIER||890||388|Rab26|protein_coding|CODING|FBtr0112677||1);UPSTREAM(MODIFIER||890||410|Rab26|protein_coding|CODING|FBtr0331794||1);UPSTREAM(MODIFIER||890||388|Rab26|protein…	Body Weight	-0.04282	0.7958	0.0614103
Body Weight	2-stearoyl-GPE (18:0)*	41220	-0.40131	0.0103	XLOC_028011	Uextra:3177610-3178493	0.53644	0.0004	3L_21310984_SNP	0.125	3.53993e-06	0.000231	0.00108696	SiteClass[FBgn0003042|Pc|SYNONYMOUS_CODING|0;FBgn0267234|CR45674|DOWNSTREAM|339;FBgn0086913|Rab26|UPSTREAM|890],TranscriptAnnot[SYNONYMOUS_CODING(LOW|SILENT|aaG/aaA|K9|390|Pc|protein_coding|CODING|FBtr0078405|1|1);UPSTREAM(MODIFIER||890||388|Rab26|protein_coding|CODING|FBtr0112677||1);UPSTREAM(MODIFIER||890||410|Rab26|protein_coding|CODING|FBtr0331794||1);UPSTREAM(MODIFIER||890||388|Rab26|protein…	Body Weight	-0.03614	0.8271	0.0614103
Body Weight	gamma-glutamylmethionine	44872	-0.35053	0.0266	FBgn0036787	3L:18455057-18456263	-0.71801	<.0001	3L_2205863_SNP	0.1081	5.48101e-08	0.001819	0.00333333	SiteClass[|||],TranscriptAnnot[INTERGENIC(MODIFIER||||||||||1)]	Body Weight	0.1909	0.2444	0.203198
Body Weight	gamma-glutamylmethionine	44872	-0.35053	0.0266	FBgn0039487	3R:22934189-22937992	-0.45275	0.0038	3L_2205863_SNP	0.1081	5.48101e-08	0.000249	0.00333333	SiteClass[|||],TranscriptAnnot[INTERGENIC(MODIFIER||||||||||1)]	Body Weight	-0.10669	0.518	0.203198
Body Weight	histamine	1574	-0.38248	0.0149	FBgn0031150	X:20924990-20953418	-0.50013	0.0012	3L_2297091_SNP	0.175	2.10332e-06	0.0001569	0.00172414	SiteClass[FBgn0264002|MsR2|INTRON|0],TranscriptAnnot[INTRON(MODIFIER||||488|MsR2|protein_coding|CODING|FBtr0330358|1|1);INTRON(MODIFIER||||488|MsR2|protein_coding|CODING|FBtr0330359|1|1);INTRON(MODIFIER||||647|MsR2|protein_coding|CODING|FBtr0330360|1|1)]	Body Weight	0.14717	0.3713	0.85356
Body Weight	histamine	1574	-0.38248	0.0149	FBgn0013469	3L:10974271-11002288	0.47118	0.0025	3L_2297091_SNP	0.175	2.10332e-06	0.0005023	0.00172414	SiteClass[FBgn0264002|MsR2|INTRON|0],TranscriptAnnot[INTRON(MODIFIER||||488|MsR2|protein_coding|CODING|FBtr0330358|1|1);INTRON(MODIFIER||||488|MsR2|protein_coding|CODING|FBtr0330359|1|1);INTRON(MODIFIER||||647|MsR2|protein_coding|CODING|FBtr0330360|1|1)]	Body Weight	0.0085	0.959	0.85356
Body Weight	1-palmitoyl-GPG (16:0)*	45970	-0.36529	0.0205	FBgn0017558	2R:5313944-5322143	0.46215	0.0031	3L_2717752_SNP	0.4103	9.16809e-06	0.0007408	0.00166667	SiteClass[FBgn0052296|Mrtf|UTR_3_PRIME|0],TranscriptAnnot[UTR_3_PRIME(MODIFIER||2036||1495|Mrtf|protein_coding|CODING|FBtr0306331|5|1)]	Body Weight	-0.14819	0.368	0.50695
Body Weight	1-palmitoyl-GPG (16:0)*	45970	-0.36529	0.0205	FBgn0040251	3R:6976748-6979571	-0.46194	0.0031	3L_2717752_SNP	0.4103	9.16809e-06	0.0005998	0.00166667	SiteClass[FBgn0052296|Mrtf|UTR_3_PRIME|0],TranscriptAnnot[UTR_3_PRIME(MODIFIER||2036||1495|Mrtf|protein_coding|CODING|FBtr0306331|5|1)]	Body Weight	0.28453	0.0792	0.50695
Body Weight	1-palmitoyl-GPG (16:0)*	45970	-0.36529	0.0205	FBgn0261563	2L:14263027-14328262	-0.54777	0.0003	3L_2717752_SNP	0.4103	9.16809e-06	0.0008523	0.00166667	SiteClass[FBgn0052296|Mrtf|UTR_3_PRIME|0],TranscriptAnnot[UTR_3_PRIME(MODIFIER||2036||1495|Mrtf|protein_coding|CODING|FBtr0306331|5|1)]	Body Weight	0.17126	0.2972	0.50695
Body Weight	histamine	1574	-0.38248	0.0149	FBgn0038830	3R:16649035-16649961	-0.50195	0.0011	3L_3007655_SNP	0.1538	1.62746e-06	0.0002225	0.00172414	SiteClass[FBgn0035385|FMRFaR|INTRON|0],TranscriptAnnot[INTRON(MODIFIER||||549|FMRFaR|protein_coding|CODING|FBtr0072980|1|1);INTRON(MODIFIER||||549|FMRFaR|protein_coding|CODING|FBtr0340706|1|1);INTRON(MODIFIER||||549|FMRFaR|protein_coding|CODING|FBtr0332085|1|1)]	Body Weight	-0.07227	0.662	0.806097
Body Weight	N-acetyl-glucosamine 1-phosphate	15741	-0.36154	0.0219	FBgn0083969	3R:25695087-25700881	0.51498	0.0008	3L_3480521_SNP	0.1053	1.90347e-07	0.0008712	0.00138889	SiteClass[FBgn0259224|CG42324|INTRON|0],TranscriptAnnot[INTRON(MODIFIER||||249|CG42324|protein_coding|CODING|FBtr0330142|1|1);INTRON(MODIFIER||||1035|CG42324|protein_coding|CODING|FBtr0334635|1|1);INTRON(MODIFIER||||1037|CG42324|protein_coding|CODING|FBtr0334636|1|1)]	Body Weight	-0.07146	0.6655	0.130417
Body Weight	N-acetyl-glucosamine 1-phosphate	15741	-0.36154	0.0219	FBgn0039312	3R:21104149-21105568	-0.56761	0.0002	3L_3480521_SNP	0.1053	1.90347e-07	0.0005237	0.00138889	SiteClass[FBgn0259224|CG42324|INTRON|0],TranscriptAnnot[INTRON(MODIFIER||||249|CG42324|protein_coding|CODING|FBtr0330142|1|1);INTRON(MODIFIER||||1035|CG42324|protein_coding|CODING|FBtr0334635|1|1);INTRON(MODIFIER||||1037|CG42324|protein_coding|CODING|FBtr0334636|1|1)]	Body Weight	-0.16985	0.3013	0.130417
Body Weight	N-acetyl-glucosamine 1-phosphate	15741	-0.36154	0.0219	FBgn0085337	3R:8914964-8915803	-0.46802	0.0027	3L_3480521_SNP	0.1053	1.90347e-07	0.000822	0.00138889	SiteClass[FBgn0259224|CG42324|INTRON|0],TranscriptAnnot[INTRON(MODIFIER||||249|CG42324|protein_coding|CODING|FBtr0330142|1|1);INTRON(MODIFIER||||1035|CG42324|protein_coding|CODING|FBtr0334635|1|1);INTRON(MODIFIER||||1037|CG42324|protein_coding|CODING|FBtr0334636|1|1)]	Body Weight	0.10132	0.5394	0.130417
Body Weight	N-acetyl-glucosamine 1-phosphate	15741	-0.36154	0.0219	FBgn0020766	2R:9855813-9857407	-0.46134	0.0031	3L_3480521_SNP	0.1053	1.90347e-07	0.001194	0.00138889	SiteClass[FBgn0259224|CG42324|INTRON|0],TranscriptAnnot[INTRON(MODIFIER||||249|CG42324|protein_coding|CODING|FBtr0330142|1|1);INTRON(MODIFIER||||1035|CG42324|protein_coding|CODING|FBtr0334635|1|1);INTRON(MODIFIER||||1037|CG42324|protein_coding|CODING|FBtr0334636|1|1)]	Body Weight	0.14444	0.3803	0.130417
Body Weight	1-palmitoyl-2-linoleoyl-GPI (16:0/18:2)	52450	-0.33283	0.0359	FBgn0020385	3R:6522256-6529038	0.48684	0.0017	3L_3499711_DEL	0.1944	3.69562e-06	1.864e-06	0.000617284	SiteClass[FBgn0259224|CG42324|INTRON|0],TranscriptAnnot[INTRON(MODIFIER||||249|CG42324|protein_coding|CODING|FBtr0330142|2|1);INTRON(MODIFIER||||925|CG42324|protein_coding|CODING|FBtr0334632|2|1);INTRON(MODIFIER||||137|CG42324|protein_coding|CODING|FBtr0334633|2|1);INTRON(MODIFIER||||923|CG42324|protein_coding|CODING|FBtr0334634|2|1);INTRON(MODIFIER||||1035|CG42324|protein_coding|CODING|FBtr03346…	Body Weight	-0.1495	0.3637	0.267619
Body Weight	1-palmitoyl-2-linoleoyl-GPI (16:0/18:2)	52450	-0.33283	0.0359	FBgn0033543	2R:6617083-6619033	0.59595	<.0001	3L_3499711_DEL	0.1944	3.69562e-06	9.04e-05	0.000617284	SiteClass[FBgn0259224|CG42324|INTRON|0],TranscriptAnnot[INTRON(MODIFIER||||249|CG42324|protein_coding|CODING|FBtr0330142|2|1);INTRON(MODIFIER||||925|CG42324|protein_coding|CODING|FBtr0334632|2|1);INTRON(MODIFIER||||137|CG42324|protein_coding|CODING|FBtr0334633|2|1);INTRON(MODIFIER||||923|CG42324|protein_coding|CODING|FBtr0334634|2|1);INTRON(MODIFIER||||1035|CG42324|protein_coding|CODING|FBtr03346…	Body Weight	-0.15466	0.3472	0.267619
Body Weight	1-palmitoyl-2-linoleoyl-GPI (16:0/18:2)	52450	-0.33283	0.0359	FBgn0085419	2R:14427090-14436474	-0.47328	0.0023	3L_3814835_SNP	0.125	5.95786e-06	0.0004374	0.000617284	SiteClass[FBgn0004888|Scsalpha|INTRON|0;FBgn0264553|CR43932|EXON|0;FBgn0266394|CR45034|DOWNSTREAM|607;FBgn0035464|CG12006|DOWNSTREAM|877],TranscriptAnnot[DOWNSTREAM(MODIFIER||877||561|CG12006|protein_coding|CODING|FBtr0073149||1);DOWNSTREAM(MODIFIER||877||531|CG12006|protein_coding|CODING|FBtr0073150||1);DOWNSTREAM(MODIFIER||607|||CR45034|ncRNA|NON_CODING|FBtr0344306||1);INTRON(MODIFIER||||328|Sc…	Body Weight	-0.033	0.8419	0.0833612
Body Weight	1-palmitoyl-2-linoleoyl-GPI (16:0/18:2)	52450	-0.33283	0.0359	FBgn0033543	2R:6617083-6619033	0.59595	<.0001	3L_3827621_DEL	0.125	6.25742e-08	0.0002566	0.000617284	SiteClass[FBgn0004875|enc|INTRON|0;FBgn0064227|Rdh|INTRON|0],TranscriptAnnot[INTRON(MODIFIER||||1818|enc|protein_coding|CODING|FBtr0073152|1|1);INTRON(MODIFIER||||1823|enc|protein_coding|CODING|FBtr0073153|1|1);INTRON(MODIFIER||||1937|enc|protein_coding|CODING|FBtr0112845|1|1);INTRON(MODIFIER||||1942|enc|protein_coding|CODING|FBtr0333208|1|1);INTRON(MODIFIER||||1827|enc|protein_coding|CODING|FBtr…	Body Weight	-0.15466	0.3472	0.0399581
Body Weight	N-acetyl-glucosamine 1-phosphate	15741	-0.36154	0.0219	FBgn0039312	3R:21104149-21105568	-0.56761	0.0002	3L_484242_SNP	0.1282	7.84023e-06	0.0008242	0.00138889	SiteClass[FBgn0001316|klar|INTRON|0],TranscriptAnnot[INTRON(MODIFIER||||1636|klar|protein_coding|CODING|FBtr0333851|1|1);INTRON(MODIFIER||||1197|klar|protein_coding|CODING|FBtr0343526|1|1);INTRON(MODIFIER||||2262|klar|protein_coding|CODING|FBtr0072565|5|1);INTRON(MODIFIER||||2045|klar|protein_coding|CODING|FBtr0110818|5|1);INTRON(MODIFIER||||1823|klar|protein_coding|CODING|FBtr0112808|5|1);INTRON…	Body Weight	-0.16985	0.3013	0.350743
Body Weight	N-acetyl-glucosamine 1-phosphate	15741	-0.36154	0.0219	FBgn0085356	X:17117001-17117848	-0.64534	<.0001	3L_484242_SNP	0.1282	7.84023e-06	0.0004736	0.00138889	SiteClass[FBgn0001316|klar|INTRON|0],TranscriptAnnot[INTRON(MODIFIER||||1636|klar|protein_coding|CODING|FBtr0333851|1|1);INTRON(MODIFIER||||1197|klar|protein_coding|CODING|FBtr0343526|1|1);INTRON(MODIFIER||||2262|klar|protein_coding|CODING|FBtr0072565|5|1);INTRON(MODIFIER||||2045|klar|protein_coding|CODING|FBtr0110818|5|1);INTRON(MODIFIER||||1823|klar|protein_coding|CODING|FBtr0112808|5|1);INTRON…	Body Weight	0.01083	0.9478	0.350743
Body Weight	1,2-dipalmitoyl-GPC (16:0/16:0)	19130	-0.33133	0.0368	FBgn0034318	2R:14076483-14077159	-0.46174	0.0031	3L_5405004_SNP	0.275	1.94343e-06	0.0006571	0.00357143	SiteClass[|||],TranscriptAnnot[INTERGENIC(MODIFIER||||||||||1)]	Body Weight	-0.14859	0.3666	0.21817
Body Weight	glycerophosphoinositol*	47155	0.36848	0.0193	XLOC_000828	2L:5944992-5945419	-0.45891	0.0033	3L_7947779_SNP	0.125	2.45424e-06	5.235e-05	0.0025	SiteClass[|||],TranscriptAnnot[INTERGENIC(MODIFIER||||||||||1)]	Body Weight	0.16347	0.32	0.231169
Body Weight	glycerophosphoinositol*	47155	0.36848	0.0193	XLOC_000828	2L:5944992-5945419	-0.45891	0.0033	3L_7947884_SNP	0.1282	2.9457e-06	4.177e-05	0.0025	SiteClass[|||],TranscriptAnnot[INTERGENIC(MODIFIER||||||||||1)]	Body Weight	0.16347	0.32	0.204774
Body Weight	2-stearoyl-GPE (18:0)*	41220	-0.40131	0.0103	FBgn0263258	X:17566491-17592763	-0.45142	0.0039	3L_8206414_SNP	0.2051	1.47516e-06	0.0008082	0.00108696	SiteClass[FBgn0035857|CG8006|NON_SYNONYMOUS_CODING|0],TranscriptAnnot[NON_SYNONYMOUS_CODING(MODERATE|MISSENSE|atG/atA|M450I|503|CG8006|protein_coding|CODING|FBtr0076698|1|1)]	Body Weight	-0.04282	0.7958	0.0436639
Body Weight	2-stearoyl-GPE (18:0)*	41220	-0.40131	0.0103	FBgn0260475	2R:9300274-9302125	-0.51113	0.0009	3L_8206414_SNP	0.2051	1.47516e-06	0.0004452	0.00108696	SiteClass[FBgn0035857|CG8006|NON_SYNONYMOUS_CODING|0],TranscriptAnnot[NON_SYNONYMOUS_CODING(MODERATE|MISSENSE|atG/atA|M450I|503|CG8006|protein_coding|CODING|FBtr0076698|1|1)]	Body Weight	0.01464	0.9295	0.0436639
Body Weight	2-stearoyl-GPE (18:0)*	41220	-0.40131	0.0103	FBgn0038450	3R:12443672-12445600	-0.50547	0.001	3L_8206414_SNP	0.2051	1.47516e-06	0.0006482	0.00108696	SiteClass[FBgn0035857|CG8006|NON_SYNONYMOUS_CODING|0],TranscriptAnnot[NON_SYNONYMOUS_CODING(MODERATE|MISSENSE|atG/atA|M450I|503|CG8006|protein_coding|CODING|FBtr0076698|1|1)]	Body Weight	0.26874	0.0981	0.0436639
Body Weight	2-stearoyl-GPE (18:0)*	41220	-0.40131	0.0103	XLOC_027415	U:8561290-8680119	0.5168	0.0008	3L_8206414_SNP	0.2051	1.47516e-06	0.0004457	0.00108696	SiteClass[FBgn0035857|CG8006|NON_SYNONYMOUS_CODING|0],TranscriptAnnot[NON_SYNONYMOUS_CODING(MODERATE|MISSENSE|atG/atA|M450I|503|CG8006|protein_coding|CODING|FBtr0076698|1|1)]	Body Weight	-0.02095	0.8993	0.0436639
Body Weight	1-(1-enyl-stearoyl)-GPE (P-18:0)*	39271	-0.39024	0.0128	FBgn0028372	2R:15558123-15560982	0.45142	0.0039	3L_8400332_SNP	0.1282	6.10313e-06	0.004975	0.00555556	SiteClass[FBgn0035890|CG13667|NON_SYNONYMOUS_CODING|0;FBgn0265102|Oseg1|DOWNSTREAM|36],TranscriptAnnot[NON_SYNONYMOUS_CODING(MODERATE|MISSENSE|Gat/Aat|D565N|582|CG13667|protein_coding|CODING|FBtr0076610|1|1);NON_SYNONYMOUS_CODING(MODERATE|MISSENSE|Gat/Aat|D565N|582|CG13667|protein_coding|CODING|FBtr0076611|2|1);DOWNSTREAM(MODIFIER||36||1169|Oseg1|protein_coding|CODING|FBtr0076663||1);DOWNSTREAM(M…	Body Weight	0.11367	0.4908	0.329978
Body Weight	1-(1-enyl-stearoyl)-GPE (P-18:0)*	39271	-0.39024	0.0128	XLOC_015512	3L:23992514-23993799	-0.56275	0.0002	3L_8400332_SNP	0.1282	6.10313e-06	0.004487	0.00555556	SiteClass[FBgn0035890|CG13667|NON_SYNONYMOUS_CODING|0;FBgn0265102|Oseg1|DOWNSTREAM|36],TranscriptAnnot[NON_SYNONYMOUS_CODING(MODERATE|MISSENSE|Gat/Aat|D565N|582|CG13667|protein_coding|CODING|FBtr0076610|1|1);NON_SYNONYMOUS_CODING(MODERATE|MISSENSE|Gat/Aat|D565N|582|CG13667|protein_coding|CODING|FBtr0076611|2|1);DOWNSTREAM(MODIFIER||36||1169|Oseg1|protein_coding|CODING|FBtr0076663||1);DOWNSTREAM(M…	Body Weight	0.12098	0.4632	0.329978
Body Weight	1-(1-enyl-stearoyl)-GPE (P-18:0)*	39271	-0.39024	0.0128	FBgn0050098	2R:12241729-12242720	-0.46862	0.0026	3L_8400332_SNP	0.1282	6.10313e-06	0.003208	0.00555556	SiteClass[FBgn0035890|CG13667|NON_SYNONYMOUS_CODING|0;FBgn0265102|Oseg1|DOWNSTREAM|36],TranscriptAnnot[NON_SYNONYMOUS_CODING(MODERATE|MISSENSE|Gat/Aat|D565N|582|CG13667|protein_coding|CODING|FBtr0076610|1|1);NON_SYNONYMOUS_CODING(MODERATE|MISSENSE|Gat/Aat|D565N|582|CG13667|protein_coding|CODING|FBtr0076611|2|1);DOWNSTREAM(MODIFIER||36||1169|Oseg1|protein_coding|CODING|FBtr0076663||1);DOWNSTREAM(M…	Body Weight	0.04899	0.7671	0.329978
Body Weight	2-stearoyl-GPE (18:0)*	41220	-0.40131	0.0103	XLOC_027415	U:8561290-8680119	0.5168	0.0008	3L_910647_SNP	0.2	2.58359e-06	0.0001246	0.00108696	SiteClass[FBgn0028999|nerfin-1|SYNONYMOUS_CODING|0],TranscriptAnnot[SYNONYMOUS_CODING(LOW|SILENT|gcA/gcG|A450|469|nerfin-1|protein_coding|CODING|FBtr0072592|1|1)]	Body Weight	-0.02095	0.8993	0.181276
Body Weight	2-stearoyl-GPE (18:0)*	41220	-0.40131	0.0103	FBgn0031184	X:21849019-21851327	-0.49069	0.0015	3L_910647_SNP	0.2	2.58359e-06	0.0001715	0.00108696	SiteClass[FBgn0028999|nerfin-1|SYNONYMOUS_CODING|0],TranscriptAnnot[SYNONYMOUS_CODING(LOW|SILENT|gcA/gcG|A450|469|nerfin-1|protein_coding|CODING|FBtr0072592|1|1)]	Body Weight	-0.05243	0.7512	0.181276
Body Weight	2-stearoyl-GPE (18:0)*	41220	-0.40131	0.0103	FBgn0034318	2R:14076483-14077159	-0.48219	0.0019	3L_910647_SNP	0.2	2.58359e-06	0.0007525	0.00108696	SiteClass[FBgn0028999|nerfin-1|SYNONYMOUS_CODING|0],TranscriptAnnot[SYNONYMOUS_CODING(LOW|SILENT|gcA/gcG|A450|469|nerfin-1|protein_coding|CODING|FBtr0072592|1|1)]	Body Weight	-0.14859	0.3666	0.181276
Body Weight	2-stearoyl-GPE (18:0)*	41220	-0.40131	0.0103	FBgn0038450	3R:12443672-12445600	-0.50547	0.001	3L_910647_SNP	0.2	2.58359e-06	0.0001401	0.00108696	SiteClass[FBgn0028999|nerfin-1|SYNONYMOUS_CODING|0],TranscriptAnnot[SYNONYMOUS_CODING(LOW|SILENT|gcA/gcG|A450|469|nerfin-1|protein_coding|CODING|FBtr0072592|1|1)]	Body Weight	0.26874	0.0981	0.181276
Body Weight	N-acetyl-glucosamine 1-phosphate	15741	-0.36154	0.0219	XLOC_016192	3L:4678041-4680194	0.48603	0.0017	3L_9643104_SNP	0.125	3.44972e-06	0.0005185	0.00138889	SiteClass[FBgn0053696|CG33696|INTRON|0;FBgn0016081|fry|INTRON|0],TranscriptAnnot[INTRON(MODIFIER||||3479|fry|protein_coding|CODING|FBtr0076417|13|1);INTRON(MODIFIER||||3527|fry|protein_coding|CODING|FBtr0301435|14|1);INTRON(MODIFIER||||3533|fry|protein_coding|CODING|FBtr0306240|14|1);INTRON(MODIFIER||||3490|fry|protein_coding|CODING|FBtr0306241|13|1);INTRON(MODIFIER||||3544|fry|protein_coding|COD…	Body Weight	-0.06994	0.6722	0.663881
Body Weight	N-acetyl-glucosamine 1-phosphate	15741	-0.36154	0.0219	FBgn0267035	X:2067513-2069888	-0.45283	0.0038	3L_9643104_SNP	0.125	3.44972e-06	0.0005368	0.00138889	SiteClass[FBgn0053696|CG33696|INTRON|0;FBgn0016081|fry|INTRON|0],TranscriptAnnot[INTRON(MODIFIER||||3479|fry|protein_coding|CODING|FBtr0076417|13|1);INTRON(MODIFIER||||3527|fry|protein_coding|CODING|FBtr0301435|14|1);INTRON(MODIFIER||||3533|fry|protein_coding|CODING|FBtr0306240|14|1);INTRON(MODIFIER||||3490|fry|protein_coding|CODING|FBtr0306241|13|1);INTRON(MODIFIER||||3544|fry|protein_coding|COD…	Body Weight	-0.03016	0.8554	0.663881
Body Weight	N-acetyl-glucosamine 1-phosphate	15741	-0.36154	0.0219	XLOC_016192	3L:4678041-4680194	0.48603	0.0017	3L_9643113_SNP	0.1282	6.83227e-06	0.0005659	0.00138889	SiteClass[FBgn0016081|fry|INTRON|0;FBgn0053696|CG33696|INTRON|0],TranscriptAnnot[INTRON(MODIFIER||||3479|fry|protein_coding|CODING|FBtr0076417|13|1);INTRON(MODIFIER||||3527|fry|protein_coding|CODING|FBtr0301435|14|1);INTRON(MODIFIER||||3533|fry|protein_coding|CODING|FBtr0306240|14|1);INTRON(MODIFIER||||3490|fry|protein_coding|CODING|FBtr0306241|13|1);INTRON(MODIFIER||||3544|fry|protein_coding|COD…	Body Weight	-0.06994	0.6722	0.662925
Body Weight	N-acetyl-glucosamine 1-phosphate	15741	-0.36154	0.0219	FBgn0267035	X:2067513-2069888	-0.45283	0.0038	3L_9643113_SNP	0.1282	6.83227e-06	0.0006878	0.00138889	SiteClass[FBgn0016081|fry|INTRON|0;FBgn0053696|CG33696|INTRON|0],TranscriptAnnot[INTRON(MODIFIER||||3479|fry|protein_coding|CODING|FBtr0076417|13|1);INTRON(MODIFIER||||3527|fry|protein_coding|CODING|FBtr0301435|14|1);INTRON(MODIFIER||||3533|fry|protein_coding|CODING|FBtr0306240|14|1);INTRON(MODIFIER||||3490|fry|protein_coding|CODING|FBtr0306241|13|1);INTRON(MODIFIER||||3544|fry|protein_coding|COD…	Body Weight	-0.03016	0.8554	0.662925
Body Weight	1-palmitoyl-GPG (16:0)*	45970	-0.36529	0.0205	FBgn0039109	3R:19549053-19557221	-0.47449	0.0023	3L_9881826_SNP	0.3	2.56554e-06	0.00136	0.00166667	SiteClass[FBgn0025866|CalpB|UPSTREAM|36;FBgn0011836|Taf2|UPSTREAM|43],TranscriptAnnot[UPSTREAM(MODIFIER||36||925|CalpB|protein_coding|CODING|FBtr0076343||1);UPSTREAM(MODIFIER||378||925|CalpB|protein_coding|CODING|FBtr0304675||1);UPSTREAM(MODIFIER||43||1221|Taf2|protein_coding|CODING|FBtr0076361||1);UPSTREAM(MODIFIER||43||1221|Taf2|protein_coding|CODING|FBtr0332688||1);INTERGENIC(MODIFIER|||||||||…	Body Weight	0.19242	0.2406	0.17322
Body Weight	1-palmitoyl-GPG (16:0)*	45970	-0.36529	0.0205	FBgn0017558	2R:5313944-5322143	0.46215	0.0031	3L_9881826_SNP	0.3	2.56554e-06	0.0003267	0.00166667	SiteClass[FBgn0025866|CalpB|UPSTREAM|36;FBgn0011836|Taf2|UPSTREAM|43],TranscriptAnnot[UPSTREAM(MODIFIER||36||925|CalpB|protein_coding|CODING|FBtr0076343||1);UPSTREAM(MODIFIER||378||925|CalpB|protein_coding|CODING|FBtr0304675||1);UPSTREAM(MODIFIER||43||1221|Taf2|protein_coding|CODING|FBtr0076361||1);UPSTREAM(MODIFIER||43||1221|Taf2|protein_coding|CODING|FBtr0332688||1);INTERGENIC(MODIFIER|||||||||…	Body Weight	-0.14819	0.368	0.17322
Body Weight	1-stearoyl-GPE (18:0)	42398	-0.38049	0.0154	FBgn0031117	X:20338482-20340823	-0.58016	0.0001	3R_10331524_SNP	0.1351	8.92344e-06	0.0003255	0.000943396	SiteClass[FBgn0265066|CR44177|INTRON|0],TranscriptAnnot[INTRON(MODIFIER|||||CR44177|ncRNA|NON_CODING|FBtr0336795|1|1)]	Body Weight	-0.03178	0.8477	0.595363
Body Weight	1-stearoyl-GPE (18:0)	42398	-0.38049	0.0154	FBgn0031117	X:20338482-20340823	-0.58016	0.0001	3R_10331537_SNP	0.1622	9.37125e-06	0.0004136	0.000943396	SiteClass[FBgn0265066|CR44177|INTRON|0],TranscriptAnnot[INTRON(MODIFIER|||||CR44177|ncRNA|NON_CODING|FBtr0336795|1|1)]	Body Weight	-0.03178	0.8477	0.308836
Body Weight	1-stearoyl-GPE (18:0)	42398	-0.38049	0.0154	FBgn0031117	X:20338482-20340823	-0.58016	0.0001	3R_10339524_SNP	0.1026	1.46312e-06	0.0005909	0.000943396	SiteClass[FBgn0038237|Pde6|DOWNSTREAM|99;FBgn0038235|CG8461|UPSTREAM|165],TranscriptAnnot[UPSTREAM(MODIFIER||165||244|CG8461|protein_coding|CODING|FBtr0082986||1);DOWNSTREAM(MODIFIER||99||1118|Pde6|protein_coding|CODING|FBtr0300330||1);DOWNSTREAM(MODIFIER||99||1124|Pde6|protein_coding|CODING|FBtr0330048||1);DOWNSTREAM(MODIFIER||99||1118|Pde6|protein_coding|CODING|FBtr0345168||1);INTERGENIC(MODIFI…	Body Weight	-0.03178	0.8477	0.282385
Body Weight	1-stearoyl-GPE (18:0)	42398	-0.38049	0.0154	FBgn0033724	2R:8270550-8272025	-0.483	0.0018	3R_10375137_SNP	0.1316	8.23138e-06	0.0007492	0.000943396	SiteClass[FBgn0038237|Pde6|INTRON|0],TranscriptAnnot[INTRON(MODIFIER||||1118|Pde6|protein_coding|CODING|FBtr0300330|2|1);INTRON(MODIFIER||||1124|Pde6|protein_coding|CODING|FBtr0330048|2|1);INTRON(MODIFIER||||1118|Pde6|protein_coding|CODING|FBtr0345168|2|1)]	Body Weight	0.216	0.1866	0.106688
Body Weight	1-stearoyl-GPE (18:0)	42398	-0.38049	0.0154	FBgn0031515	2L:3291245-3294706	0.47186	0.0024	3R_10375137_SNP	0.1316	8.23138e-06	0.0006606	0.000943396	SiteClass[FBgn0038237|Pde6|INTRON|0],TranscriptAnnot[INTRON(MODIFIER||||1118|Pde6|protein_coding|CODING|FBtr0300330|2|1);INTRON(MODIFIER||||1124|Pde6|protein_coding|CODING|FBtr0330048|2|1);INTRON(MODIFIER||||1118|Pde6|protein_coding|CODING|FBtr0345168|2|1)]	Body Weight	-0.20203	0.2174	0.106688
Body Weight	1-stearoyl-GPE (18:0)	42398	-0.38049	0.0154	FBgn0031117	X:20338482-20340823	-0.58016	0.0001	3R_10375137_SNP	0.1316	8.23138e-06	5.517e-05	0.000943396	SiteClass[FBgn0038237|Pde6|INTRON|0],TranscriptAnnot[INTRON(MODIFIER||||1118|Pde6|protein_coding|CODING|FBtr0300330|2|1);INTRON(MODIFIER||||1124|Pde6|protein_coding|CODING|FBtr0330048|2|1);INTRON(MODIFIER||||1118|Pde6|protein_coding|CODING|FBtr0345168|2|1)]	Body Weight	-0.03178	0.8477	0.106688
Body Weight	histamine	1574	-0.38248	0.0149	FBgn0039326	3R:21146775-21148479	-0.47634	0.0022	3R_11287362_SNP	0.1081	4.86079e-06	0.001398	0.00172414	SiteClass[FBgn0038341|AdamTS-A|INTRON|0],TranscriptAnnot[UPSTREAM(MODIFIER||559||1537|AdamTS-A|protein_coding|CODING|FBtr0339398||1);INTRON(MODIFIER||||1585|AdamTS-A|protein_coding|CODING|FBtr0334629|1|1);INTRON(MODIFIER||||1688|AdamTS-A|protein_coding|CODING|FBtr0083160|1|1)]	Body Weight	0.06346	0.7011	0.403955
Body Weight	histamine	1574	-0.38248	0.0149	FBgn0267073	X:5322516-5323289	-0.45286	0.0038	3R_11287362_SNP	0.1081	4.86079e-06	0.001538	0.00172414	SiteClass[FBgn0038341|AdamTS-A|INTRON|0],TranscriptAnnot[UPSTREAM(MODIFIER||559||1537|AdamTS-A|protein_coding|CODING|FBtr0339398||1);INTRON(MODIFIER||||1585|AdamTS-A|protein_coding|CODING|FBtr0334629|1|1);INTRON(MODIFIER||||1688|AdamTS-A|protein_coding|CODING|FBtr0083160|1|1)]	Body Weight	0.06478	0.6952	0.403955
Body Weight	1-stearoyl-2-linoleoyl-GPC (18:0/18:2)*	52452	-0.37242	0.018	XLOC_029510	X:8093402-8097212	-0.46174	0.0031	3R_13333159_SNP	0.2632	2.84908e-06	0.001935	0.0025	SiteClass[|||],TranscriptAnnot[INTERGENIC(MODIFIER||||||||||1)]	Body Weight	-0.01478	0.9289	0.248557
Body Weight	1-stearoyl-2-linoleoyl-GPC (18:0/18:2)*	52452	-0.37242	0.018	FBgn0050383	2R:3711448-3712646	-0.45547	0.0036	3R_13333180_SNP	0.2632	1.59131e-06	0.001901	0.0025	SiteClass[|||],TranscriptAnnot[INTERGENIC(MODIFIER||||||||||1)]	Body Weight	-0.06711	0.6848	0.240986
Body Weight	1-(1-enyl-stearoyl)-GPE (P-18:0)*	39271	-0.39024	0.0128	XLOC_018870	3L:23605963-23612500	0.52227	0.0006	3R_13360932_SNP	0.4595	6.57162e-06	0.005428	0.00555556	SiteClass[FBgn0038516|P5cr-2|INTRON|0;FBgn0038515|CG5823|UPSTREAM|623],TranscriptAnnot[UPSTREAM(MODIFIER||623||283|CG5823|protein_coding|CODING|FBtr0083505||1);UPSTREAM(MODIFIER||623||283|CG5823|protein_coding|CODING|FBtr0321266||1);UPSTREAM(MODIFIER||475||273|P5cr-2|protein_coding|CODING|FBtr0083454||1);UPSTREAM(MODIFIER||477||174|P5cr-2|protein_coding|CODING|FBtr0083455||1);INTRON(MODIFIER||||2…	Body Weight	-0.29232	0.0709	0.0768263
Body Weight	1-(1-enyl-stearoyl)-GPE (P-18:0)*	39271	-0.39024	0.0128	FBgn0028372	2R:15558123-15560982	0.45142	0.0039	3R_13360932_SNP	0.4595	6.57162e-06	0.002095	0.00555556	SiteClass[FBgn0038516|P5cr-2|INTRON|0;FBgn0038515|CG5823|UPSTREAM|623],TranscriptAnnot[UPSTREAM(MODIFIER||623||283|CG5823|protein_coding|CODING|FBtr0083505||1);UPSTREAM(MODIFIER||623||283|CG5823|protein_coding|CODING|FBtr0321266||1);UPSTREAM(MODIFIER||475||273|P5cr-2|protein_coding|CODING|FBtr0083454||1);UPSTREAM(MODIFIER||477||174|P5cr-2|protein_coding|CODING|FBtr0083455||1);INTRON(MODIFIER||||2…	Body Weight	0.11367	0.4908	0.0768263
Body Weight	1-(1-enyl-stearoyl)-GPE (P-18:0)*	39271	-0.39024	0.0128	FBgn0010038	3R:8197693-8198426	0.60081	<.0001	3R_13360932_SNP	0.4595	6.57162e-06	0.00194	0.00555556	SiteClass[FBgn0038516|P5cr-2|INTRON|0;FBgn0038515|CG5823|UPSTREAM|623],TranscriptAnnot[UPSTREAM(MODIFIER||623||283|CG5823|protein_coding|CODING|FBtr0083505||1);UPSTREAM(MODIFIER||623||283|CG5823|protein_coding|CODING|FBtr0321266||1);UPSTREAM(MODIFIER||475||273|P5cr-2|protein_coding|CODING|FBtr0083454||1);UPSTREAM(MODIFIER||477||174|P5cr-2|protein_coding|CODING|FBtr0083455||1);INTRON(MODIFIER||||2…	Body Weight	-0.21276	0.1935	0.0768263
Body Weight	1-(1-enyl-stearoyl)-GPE (P-18:0)*	39271	-0.39024	0.0128	FBgn0050098	2R:12241729-12242720	-0.46862	0.0026	3R_13360932_SNP	0.4595	6.57162e-06	0.0006014	0.00555556	SiteClass[FBgn0038516|P5cr-2|INTRON|0;FBgn0038515|CG5823|UPSTREAM|623],TranscriptAnnot[UPSTREAM(MODIFIER||623||283|CG5823|protein_coding|CODING|FBtr0083505||1);UPSTREAM(MODIFIER||623||283|CG5823|protein_coding|CODING|FBtr0321266||1);UPSTREAM(MODIFIER||475||273|P5cr-2|protein_coding|CODING|FBtr0083454||1);UPSTREAM(MODIFIER||477||174|P5cr-2|protein_coding|CODING|FBtr0083455||1);INTRON(MODIFIER||||2…	Body Weight	0.04899	0.7671	0.0768263
Body Weight	1-(1-enyl-stearoyl)-GPE (P-18:0)*	39271	-0.39024	0.0128	XLOC_008731	2R:20031311-20034140	-0.5583	0.0002	3R_13360932_SNP	0.4595	6.57162e-06	0.001308	0.00555556	SiteClass[FBgn0038516|P5cr-2|INTRON|0;FBgn0038515|CG5823|UPSTREAM|623],TranscriptAnnot[UPSTREAM(MODIFIER||623||283|CG5823|protein_coding|CODING|FBtr0083505||1);UPSTREAM(MODIFIER||623||283|CG5823|protein_coding|CODING|FBtr0321266||1);UPSTREAM(MODIFIER||475||273|P5cr-2|protein_coding|CODING|FBtr0083454||1);UPSTREAM(MODIFIER||477||174|P5cr-2|protein_coding|CODING|FBtr0083455||1);INTRON(MODIFIER||||2…	Body Weight	0.23483	0.1501	0.0768263
Body Weight	1-(1-enyl-stearoyl)-GPE (P-18:0)*	39271	-0.39024	0.0128	FBgn0033027	2R:1390942-1395371	-0.50304	0.0011	3R_13360932_SNP	0.4595	6.57162e-06	0.0005104	0.00555556	SiteClass[FBgn0038516|P5cr-2|INTRON|0;FBgn0038515|CG5823|UPSTREAM|623],TranscriptAnnot[UPSTREAM(MODIFIER||623||283|CG5823|protein_coding|CODING|FBtr0083505||1);UPSTREAM(MODIFIER||623||283|CG5823|protein_coding|CODING|FBtr0321266||1);UPSTREAM(MODIFIER||475||273|P5cr-2|protein_coding|CODING|FBtr0083454||1);UPSTREAM(MODIFIER||477||174|P5cr-2|protein_coding|CODING|FBtr0083455||1);INTRON(MODIFIER||||2…	Body Weight	-0.08513	0.6064	0.0768263
Body Weight	1-(1-enyl-stearoyl)-GPE (P-18:0)*	39271	-0.39024	0.0128	FBgn0036727	3L:17463227-17467617	-0.54858	0.0003	3R_13360932_SNP	0.4595	6.57162e-06	0.00215	0.00555556	SiteClass[FBgn0038516|P5cr-2|INTRON|0;FBgn0038515|CG5823|UPSTREAM|623],TranscriptAnnot[UPSTREAM(MODIFIER||623||283|CG5823|protein_coding|CODING|FBtr0083505||1);UPSTREAM(MODIFIER||623||283|CG5823|protein_coding|CODING|FBtr0321266||1);UPSTREAM(MODIFIER||475||273|P5cr-2|protein_coding|CODING|FBtr0083454||1);UPSTREAM(MODIFIER||477||174|P5cr-2|protein_coding|CODING|FBtr0083455||1);INTRON(MODIFIER||||2…	Body Weight	-0.07814	0.6363	0.0768263
Body Weight	1-(1-enyl-stearoyl)-GPE (P-18:0)*	39271	-0.39024	0.0128	XLOC_019435	3LHet:1138250-1138430	-0.45304	0.0038	3R_13360932_SNP	0.4595	6.57162e-06	0.0006308	0.00555556	SiteClass[FBgn0038516|P5cr-2|INTRON|0;FBgn0038515|CG5823|UPSTREAM|623],TranscriptAnnot[UPSTREAM(MODIFIER||623||283|CG5823|protein_coding|CODING|FBtr0083505||1);UPSTREAM(MODIFIER||623||283|CG5823|protein_coding|CODING|FBtr0321266||1);UPSTREAM(MODIFIER||475||273|P5cr-2|protein_coding|CODING|FBtr0083454||1);UPSTREAM(MODIFIER||477||174|P5cr-2|protein_coding|CODING|FBtr0083455||1);INTRON(MODIFIER||||2…	Body Weight	0.22461	0.1692	0.0768263
Body Weight	1-(1-enyl-stearoyl)-GPE (P-18:0)*	39271	-0.39024	0.0128	FBgn0039809	3R:26707514-26709225	0.46518	0.0028	3R_13360932_SNP	0.4595	6.57162e-06	0.001672	0.00555556	SiteClass[FBgn0038516|P5cr-2|INTRON|0;FBgn0038515|CG5823|UPSTREAM|623],TranscriptAnnot[UPSTREAM(MODIFIER||623||283|CG5823|protein_coding|CODING|FBtr0083505||1);UPSTREAM(MODIFIER||623||283|CG5823|protein_coding|CODING|FBtr0321266||1);UPSTREAM(MODIFIER||475||273|P5cr-2|protein_coding|CODING|FBtr0083454||1);UPSTREAM(MODIFIER||477||174|P5cr-2|protein_coding|CODING|FBtr0083455||1);INTRON(MODIFIER||||2…	Body Weight	-0.12359	0.4535	0.0768263
Body Weight	1-(1-enyl-stearoyl)-GPE (P-18:0)*	39271	-0.39024	0.0128	FBgn0036942	3L:20132310-20133707	-0.46134	0.0031	3R_13360932_SNP	0.4595	6.57162e-06	0.004033	0.00555556	SiteClass[FBgn0038516|P5cr-2|INTRON|0;FBgn0038515|CG5823|UPSTREAM|623],TranscriptAnnot[UPSTREAM(MODIFIER||623||283|CG5823|protein_coding|CODING|FBtr0083505||1);UPSTREAM(MODIFIER||623||283|CG5823|protein_coding|CODING|FBtr0321266||1);UPSTREAM(MODIFIER||475||273|P5cr-2|protein_coding|CODING|FBtr0083454||1);UPSTREAM(MODIFIER||477||174|P5cr-2|protein_coding|CODING|FBtr0083455||1);INTRON(MODIFIER||||2…	Body Weight	0.06215	0.707	0.0768263
Body Weight	1-(1-enyl-stearoyl)-GPE (P-18:0)*	39271	-0.39024	0.0128	XLOC_006551	2R:2154491-2156188	-0.49879	0.0012	3R_13360932_SNP	0.4595	6.57162e-06	0.003105	0.00555556	SiteClass[FBgn0038516|P5cr-2|INTRON|0;FBgn0038515|CG5823|UPSTREAM|623],TranscriptAnnot[UPSTREAM(MODIFIER||623||283|CG5823|protein_coding|CODING|FBtr0083505||1);UPSTREAM(MODIFIER||623||283|CG5823|protein_coding|CODING|FBtr0321266||1);UPSTREAM(MODIFIER||475||273|P5cr-2|protein_coding|CODING|FBtr0083454||1);UPSTREAM(MODIFIER||477||174|P5cr-2|protein_coding|CODING|FBtr0083455||1);INTRON(MODIFIER||||2…	Body Weight	-0.19849	0.2258	0.0768263
Body Weight	1-(1-enyl-stearoyl)-GPE (P-18:0)*	39271	-0.39024	0.0128	FBgn0031184	X:21849019-21851327	-0.66296	<.0001	3R_13360932_SNP	0.4595	6.57162e-06	0.002691	0.00555556	SiteClass[FBgn0038516|P5cr-2|INTRON|0;FBgn0038515|CG5823|UPSTREAM|623],TranscriptAnnot[UPSTREAM(MODIFIER||623||283|CG5823|protein_coding|CODING|FBtr0083505||1);UPSTREAM(MODIFIER||623||283|CG5823|protein_coding|CODING|FBtr0321266||1);UPSTREAM(MODIFIER||475||273|P5cr-2|protein_coding|CODING|FBtr0083454||1);UPSTREAM(MODIFIER||477||174|P5cr-2|protein_coding|CODING|FBtr0083455||1);INTRON(MODIFIER||||2…	Body Weight	-0.05243	0.7512	0.0768263
Body Weight	1-(1-enyl-stearoyl)-GPE (P-18:0)*	39271	-0.39024	0.0128	FBgn0036727	3L:17463227-17467617	-0.54858	0.0003	3R_13360951_SNP	0.4865	1.00282e-06	0.002592	0.00555556	SiteClass[FBgn0038516|P5cr-2|INTRON|0;FBgn0038515|CG5823|UPSTREAM|642],TranscriptAnnot[UPSTREAM(MODIFIER||642||283|CG5823|protein_coding|CODING|FBtr0083505||1);UPSTREAM(MODIFIER||642||283|CG5823|protein_coding|CODING|FBtr0321266||1);UPSTREAM(MODIFIER||456||273|P5cr-2|protein_coding|CODING|FBtr0083454||1);UPSTREAM(MODIFIER||458||174|P5cr-2|protein_coding|CODING|FBtr0083455||1);INTRON(MODIFIER||||2…	Body Weight	-0.07814	0.6363	0.0690282
Body Weight	1-(1-enyl-stearoyl)-GPE (P-18:0)*	39271	-0.39024	0.0128	FBgn0010038	3R:8197693-8198426	0.60081	<.0001	3R_13360951_SNP	0.4865	1.00282e-06	0.002423	0.00555556	SiteClass[FBgn0038516|P5cr-2|INTRON|0;FBgn0038515|CG5823|UPSTREAM|642],TranscriptAnnot[UPSTREAM(MODIFIER||642||283|CG5823|protein_coding|CODING|FBtr0083505||1);UPSTREAM(MODIFIER||642||283|CG5823|protein_coding|CODING|FBtr0321266||1);UPSTREAM(MODIFIER||456||273|P5cr-2|protein_coding|CODING|FBtr0083454||1);UPSTREAM(MODIFIER||458||174|P5cr-2|protein_coding|CODING|FBtr0083455||1);INTRON(MODIFIER||||2…	Body Weight	-0.21276	0.1935	0.0690282
Body Weight	1-(1-enyl-stearoyl)-GPE (P-18:0)*	39271	-0.39024	0.0128	XLOC_008731	2R:20031311-20034140	-0.5583	0.0002	3R_13360951_SNP	0.4865	1.00282e-06	0.0009573	0.00555556	SiteClass[FBgn0038516|P5cr-2|INTRON|0;FBgn0038515|CG5823|UPSTREAM|642],TranscriptAnnot[UPSTREAM(MODIFIER||642||283|CG5823|protein_coding|CODING|FBtr0083505||1);UPSTREAM(MODIFIER||642||283|CG5823|protein_coding|CODING|FBtr0321266||1);UPSTREAM(MODIFIER||456||273|P5cr-2|protein_coding|CODING|FBtr0083454||1);UPSTREAM(MODIFIER||458||174|P5cr-2|protein_coding|CODING|FBtr0083455||1);INTRON(MODIFIER||||2…	Body Weight	0.23483	0.1501	0.0690282
Body Weight	1-(1-enyl-stearoyl)-GPE (P-18:0)*	39271	-0.39024	0.0128	FBgn0036942	3L:20132310-20133707	-0.46134	0.0031	3R_13360951_SNP	0.4865	1.00282e-06	0.003913	0.00555556	SiteClass[FBgn0038516|P5cr-2|INTRON|0;FBgn0038515|CG5823|UPSTREAM|642],TranscriptAnnot[UPSTREAM(MODIFIER||642||283|CG5823|protein_coding|CODING|FBtr0083505||1);UPSTREAM(MODIFIER||642||283|CG5823|protein_coding|CODING|FBtr0321266||1);UPSTREAM(MODIFIER||456||273|P5cr-2|protein_coding|CODING|FBtr0083454||1);UPSTREAM(MODIFIER||458||174|P5cr-2|protein_coding|CODING|FBtr0083455||1);INTRON(MODIFIER||||2…	Body Weight	0.06215	0.707	0.0690282
Body Weight	1-(1-enyl-stearoyl)-GPE (P-18:0)*	39271	-0.39024	0.0128	XLOC_018870	3L:23605963-23612500	0.52227	0.0006	3R_13360951_SNP	0.4865	1.00282e-06	0.001877	0.00555556	SiteClass[FBgn0038516|P5cr-2|INTRON|0;FBgn0038515|CG5823|UPSTREAM|642],TranscriptAnnot[UPSTREAM(MODIFIER||642||283|CG5823|protein_coding|CODING|FBtr0083505||1);UPSTREAM(MODIFIER||642||283|CG5823|protein_coding|CODING|FBtr0321266||1);UPSTREAM(MODIFIER||456||273|P5cr-2|protein_coding|CODING|FBtr0083454||1);UPSTREAM(MODIFIER||458||174|P5cr-2|protein_coding|CODING|FBtr0083455||1);INTRON(MODIFIER||||2…	Body Weight	-0.29232	0.0709	0.0690282
Body Weight	1-(1-enyl-stearoyl)-GPE (P-18:0)*	39271	-0.39024	0.0128	XLOC_019435	3LHet:1138250-1138430	-0.45304	0.0038	3R_13360951_SNP	0.4865	1.00282e-06	0.001007	0.00555556	SiteClass[FBgn0038516|P5cr-2|INTRON|0;FBgn0038515|CG5823|UPSTREAM|642],TranscriptAnnot[UPSTREAM(MODIFIER||642||283|CG5823|protein_coding|CODING|FBtr0083505||1);UPSTREAM(MODIFIER||642||283|CG5823|protein_coding|CODING|FBtr0321266||1);UPSTREAM(MODIFIER||456||273|P5cr-2|protein_coding|CODING|FBtr0083454||1);UPSTREAM(MODIFIER||458||174|P5cr-2|protein_coding|CODING|FBtr0083455||1);INTRON(MODIFIER||||2…	Body Weight	0.22461	0.1692	0.0690282
Body Weight	1-(1-enyl-stearoyl)-GPE (P-18:0)*	39271	-0.39024	0.0128	FBgn0028372	2R:15558123-15560982	0.45142	0.0039	3R_13360951_SNP	0.4865	1.00282e-06	0.002746	0.00555556	SiteClass[FBgn0038516|P5cr-2|INTRON|0;FBgn0038515|CG5823|UPSTREAM|642],TranscriptAnnot[UPSTREAM(MODIFIER||642||283|CG5823|protein_coding|CODING|FBtr0083505||1);UPSTREAM(MODIFIER||642||283|CG5823|protein_coding|CODING|FBtr0321266||1);UPSTREAM(MODIFIER||456||273|P5cr-2|protein_coding|CODING|FBtr0083454||1);UPSTREAM(MODIFIER||458||174|P5cr-2|protein_coding|CODING|FBtr0083455||1);INTRON(MODIFIER||||2…	Body Weight	0.11367	0.4908	0.0690282
Body Weight	1-(1-enyl-stearoyl)-GPE (P-18:0)*	39271	-0.39024	0.0128	FBgn0039809	3R:26707514-26709225	0.46518	0.0028	3R_13360951_SNP	0.4865	1.00282e-06	0.0008796	0.00555556	SiteClass[FBgn0038516|P5cr-2|INTRON|0;FBgn0038515|CG5823|UPSTREAM|642],TranscriptAnnot[UPSTREAM(MODIFIER||642||283|CG5823|protein_coding|CODING|FBtr0083505||1);UPSTREAM(MODIFIER||642||283|CG5823|protein_coding|CODING|FBtr0321266||1);UPSTREAM(MODIFIER||456||273|P5cr-2|protein_coding|CODING|FBtr0083454||1);UPSTREAM(MODIFIER||458||174|P5cr-2|protein_coding|CODING|FBtr0083455||1);INTRON(MODIFIER||||2…	Body Weight	-0.12359	0.4535	0.0690282
Body Weight	1-(1-enyl-stearoyl)-GPE (P-18:0)*	39271	-0.39024	0.0128	FBgn0050098	2R:12241729-12242720	-0.46862	0.0026	3R_13360951_SNP	0.4865	1.00282e-06	0.0004664	0.00555556	SiteClass[FBgn0038516|P5cr-2|INTRON|0;FBgn0038515|CG5823|UPSTREAM|642],TranscriptAnnot[UPSTREAM(MODIFIER||642||283|CG5823|protein_coding|CODING|FBtr0083505||1);UPSTREAM(MODIFIER||642||283|CG5823|protein_coding|CODING|FBtr0321266||1);UPSTREAM(MODIFIER||456||273|P5cr-2|protein_coding|CODING|FBtr0083454||1);UPSTREAM(MODIFIER||458||174|P5cr-2|protein_coding|CODING|FBtr0083455||1);INTRON(MODIFIER||||2…	Body Weight	0.04899	0.7671	0.0690282
Body Weight	1-(1-enyl-stearoyl)-GPE (P-18:0)*	39271	-0.39024	0.0128	FBgn0033027	2R:1390942-1395371	-0.50304	0.0011	3R_13360951_SNP	0.4865	1.00282e-06	0.0004958	0.00555556	SiteClass[FBgn0038516|P5cr-2|INTRON|0;FBgn0038515|CG5823|UPSTREAM|642],TranscriptAnnot[UPSTREAM(MODIFIER||642||283|CG5823|protein_coding|CODING|FBtr0083505||1);UPSTREAM(MODIFIER||642||283|CG5823|protein_coding|CODING|FBtr0321266||1);UPSTREAM(MODIFIER||456||273|P5cr-2|protein_coding|CODING|FBtr0083454||1);UPSTREAM(MODIFIER||458||174|P5cr-2|protein_coding|CODING|FBtr0083455||1);INTRON(MODIFIER||||2…	Body Weight	-0.08513	0.6064	0.0690282
Body Weight	1-(1-enyl-stearoyl)-GPE (P-18:0)*	39271	-0.39024	0.0128	XLOC_011937	2RHet:1087343-1089713	-0.65587	<.0001	3R_13360951_SNP	0.4865	1.00282e-06	0.004392	0.00555556	SiteClass[FBgn0038516|P5cr-2|INTRON|0;FBgn0038515|CG5823|UPSTREAM|642],TranscriptAnnot[UPSTREAM(MODIFIER||642||283|CG5823|protein_coding|CODING|FBtr0083505||1);UPSTREAM(MODIFIER||642||283|CG5823|protein_coding|CODING|FBtr0321266||1);UPSTREAM(MODIFIER||456||273|P5cr-2|protein_coding|CODING|FBtr0083454||1);UPSTREAM(MODIFIER||458||174|P5cr-2|protein_coding|CODING|FBtr0083455||1);INTRON(MODIFIER||||2…	Body Weight	-0.10744	0.515	0.0690282
Body Weight	1-(1-enyl-stearoyl)-GPE (P-18:0)*	39271	-0.39024	0.0128	FBgn0031184	X:21849019-21851327	-0.66296	<.0001	3R_13360951_SNP	0.4865	1.00282e-06	0.002429	0.00555556	SiteClass[FBgn0038516|P5cr-2|INTRON|0;FBgn0038515|CG5823|UPSTREAM|642],TranscriptAnnot[UPSTREAM(MODIFIER||642||283|CG5823|protein_coding|CODING|FBtr0083505||1);UPSTREAM(MODIFIER||642||283|CG5823|protein_coding|CODING|FBtr0321266||1);UPSTREAM(MODIFIER||456||273|P5cr-2|protein_coding|CODING|FBtr0083454||1);UPSTREAM(MODIFIER||458||174|P5cr-2|protein_coding|CODING|FBtr0083455||1);INTRON(MODIFIER||||2…	Body Weight	-0.05243	0.7512	0.0690282
Body Weight	1-(1-enyl-stearoyl)-GPE (P-18:0)*	39271	-0.39024	0.0128	XLOC_006551	2R:2154491-2156188	-0.49879	0.0012	3R_13360951_SNP	0.4865	1.00282e-06	0.002249	0.00555556	SiteClass[FBgn0038516|P5cr-2|INTRON|0;FBgn0038515|CG5823|UPSTREAM|642],TranscriptAnnot[UPSTREAM(MODIFIER||642||283|CG5823|protein_coding|CODING|FBtr0083505||1);UPSTREAM(MODIFIER||642||283|CG5823|protein_coding|CODING|FBtr0321266||1);UPSTREAM(MODIFIER||456||273|P5cr-2|protein_coding|CODING|FBtr0083454||1);UPSTREAM(MODIFIER||458||174|P5cr-2|protein_coding|CODING|FBtr0083455||1);INTRON(MODIFIER||||2…	Body Weight	-0.19849	0.2258	0.0690282
Body Weight	1-(1-enyl-stearoyl)-GPE (P-18:0)*	39271	-0.39024	0.0128	FBgn0031184	X:21849019-21851327	-0.66296	<.0001	3R_14202483_SNP	0.175	1.45348e-06	0.003611	0.00555556	SiteClass[FBgn0266251|CR44946|DOWNSTREAM|264],TranscriptAnnot[DOWNSTREAM(MODIFIER||264|||CR44946|ncRNA|NON_CODING|FBtr0343918||1);INTERGENIC(MODIFIER||||||||||1)]	Body Weight	-0.05243	0.7512	0.385063
Body Weight	1-(1-enyl-stearoyl)-GPE (P-18:0)*	39271	-0.39024	0.0128	FBgn0036727	3L:17463227-17467617	-0.54858	0.0003	3R_14202483_SNP	0.175	1.45348e-06	0.003934	0.00555556	SiteClass[FBgn0266251|CR44946|DOWNSTREAM|264],TranscriptAnnot[DOWNSTREAM(MODIFIER||264|||CR44946|ncRNA|NON_CODING|FBtr0343918||1);INTERGENIC(MODIFIER||||||||||1)]	Body Weight	-0.07814	0.6363	0.385063
Body Weight	1-(1-enyl-stearoyl)-GPE (P-18:0)*	39271	-0.39024	0.0128	XLOC_015512	3L:23992514-23993799	-0.56275	0.0002	3R_14202483_SNP	0.175	1.45348e-06	0.001621	0.00555556	SiteClass[FBgn0266251|CR44946|DOWNSTREAM|264],TranscriptAnnot[DOWNSTREAM(MODIFIER||264|||CR44946|ncRNA|NON_CODING|FBtr0343918||1);INTERGENIC(MODIFIER||||||||||1)]	Body Weight	0.12098	0.4632	0.385063
Body Weight	2-stearoyl-GPE (18:0)*	41220	-0.40131	0.0103	XLOC_015512	3L:23992514-23993799	-0.48846	0.0016	3R_15108366_SNP	0.2308	7.12502e-06	0.0003	0.00108696	SiteClass[|||],TranscriptAnnot[INTERGENIC(MODIFIER||||||||||1)]	Body Weight	0.12098	0.4632	0.215846
Body Weight	glycerophosphoinositol*	47155	0.36848	0.0193	XLOC_000828	2L:5944992-5945419	-0.45891	0.0033	3R_15710930_SNP	0.2308	2.19017e-06	0.0003966	0.0025	SiteClass[FBgn0014006|Pk92B|NON_SYNONYMOUS_CODING|0],TranscriptAnnot[NON_SYNONYMOUS_CODING(MODERATE|MISSENSE|Ggc/Agc|G1045S|1196|Pk92B|protein_coding|CODING|FBtr0083819|8|1);NON_SYNONYMOUS_CODING(MODERATE|MISSENSE|Ggc/Agc|G1212S|1363|Pk92B|protein_coding|CODING|FBtr0300256|9|1)]	Body Weight	0.16347	0.32	0.408908
Body Weight	1-(1-enyl-stearoyl)-GPE (P-18:0)*	39271	-0.39024	0.0128	FBgn0028372	2R:15558123-15560982	0.45142	0.0039	3R_17506140_INS	0.1538	5.15755e-06	0.005374	0.00555556	SiteClass[FBgn0051176|CG31176|INTRON|0],TranscriptAnnot[INTRON(MODIFIER||||460|CG31176|protein_coding|CODING|FBtr0084114|1|1)]	Body Weight	0.11367	0.4908	0.682874
Body Weight	1-(1-enyl-stearoyl)-GPE (P-18:0)*	39271	-0.39024	0.0128	FBgn0040251	3R:6976748-6979571	-0.50243	0.0011	3R_17506140_INS	0.1538	5.15755e-06	0.00391	0.00555556	SiteClass[FBgn0051176|CG31176|INTRON|0],TranscriptAnnot[INTRON(MODIFIER||||460|CG31176|protein_coding|CODING|FBtr0084114|1|1)]	Body Weight	0.28453	0.0792	0.682874
Body Weight	1-palmitoyl-2-linoleoyl-GPI (16:0/18:2)	52450	-0.33283	0.0359	FBgn0002719	3R:8538825-8548164	0.483	0.0018	3R_18629386_SNP	0.2	6.78144e-06	0.0005676	0.000617284	SiteClass[FBgn0039027|CG7031|UPSTREAM|627],TranscriptAnnot[UPSTREAM(MODIFIER||627||475|CG7031|protein_coding|CODING|FBtr0084313||1);UPSTREAM(MODIFIER||627||475|CG7031|protein_coding|CODING|FBtr0339137||1);UPSTREAM(MODIFIER||627||474|CG7031|protein_coding|CODING|FBtr0345272||1);INTERGENIC(MODIFIER||||||||||1)]	Body Weight	-0.11104	0.501	0.168767
Body Weight	gamma-glutamylmethionine	44872	-0.35053	0.0266	FBgn0036787	3L:18455057-18456263	-0.71801	<.0001	3R_18677111_SNP	0.1026	9.81818e-08	0.0004799	0.00333333	SiteClass[FBgn0264428|CR43846|EXON|0],TranscriptAnnot[EXON(MODIFIER|||||CR43846|ncRNA|NON_CODING|FBtr0332548|1|1)]	Body Weight	0.1909	0.2444	0.851905
Body Weight	gamma-glutamylmethionine	44872	-0.35053	0.0266	FBgn0039487	3R:22934189-22937992	-0.45275	0.0038	3R_18677111_SNP	0.1026	9.81818e-08	0.000554	0.00333333	SiteClass[FBgn0264428|CR43846|EXON|0],TranscriptAnnot[EXON(MODIFIER|||||CR43846|ncRNA|NON_CODING|FBtr0332548|1|1)]	Body Weight	-0.10669	0.518	0.851905
Body Weight	gamma-glutamylmethionine	44872	-0.35053	0.0266	FBgn0036787	3L:18455057-18456263	-0.71801	<.0001	3R_20328016_SNP	0.1081	1.60974e-08	0.00095	0.00333333	SiteClass[|||],TranscriptAnnot[INTERGENIC(MODIFIER||||||||||1)]	Body Weight	0.1909	0.2444	0.209782
Body Weight	gamma-glutamylmethionine	44872	-0.35053	0.0266	FBgn0004387	3R:23373497-23384867	0.48534	0.0017	3R_20328016_SNP	0.1081	1.60974e-08	0.0007236	0.00333333	SiteClass[|||],TranscriptAnnot[INTERGENIC(MODIFIER||||||||||1)]	Body Weight	-0.13746	0.404	0.209782
Body Weight	gamma-glutamylmethionine	44872	-0.35053	0.0266	FBgn0039487	3R:22934189-22937992	-0.45275	0.0038	3R_20328016_SNP	0.1081	1.60974e-08	0.000228	0.00333333	SiteClass[|||],TranscriptAnnot[INTERGENIC(MODIFIER||||||||||1)]	Body Weight	-0.10669	0.518	0.209782
Body Weight	N-acetyl-glucosamine 1-phosphate	15741	-0.36154	0.0219	FBgn0267035	X:2067513-2069888	-0.45283	0.0038	3R_21109320_SNP	0.2162	6.51843e-06	0.0002191	0.00138889	SiteClass[FBgn0051300|CG31300|UPSTREAM|22;FBgn0039313|CG11892|DOWNSTREAM|361],TranscriptAnnot[UPSTREAM(MODIFIER||22||422|CG31300|protein_coding|CODING|FBtr0084824||1);DOWNSTREAM(MODIFIER||361||439|CG11892|protein_coding|CODING|FBtr0089644||1);DOWNSTREAM(MODIFIER||361||439|CG11892|protein_coding|CODING|FBtr0089645||1);INTERGENIC(MODIFIER||||||||||1)]	Body Weight	-0.03016	0.8554	0.564166
Body Weight	N-acetyl-glucosamine 1-phosphate	15741	-0.36154	0.0219	FBgn0031694	2L:5266392-5268455	-0.4664	0.0028	3R_21109320_SNP	0.2162	6.51843e-06	0.001072	0.00138889	SiteClass[FBgn0051300|CG31300|UPSTREAM|22;FBgn0039313|CG11892|DOWNSTREAM|361],TranscriptAnnot[UPSTREAM(MODIFIER||22||422|CG31300|protein_coding|CODING|FBtr0084824||1);DOWNSTREAM(MODIFIER||361||439|CG11892|protein_coding|CODING|FBtr0089644||1);DOWNSTREAM(MODIFIER||361||439|CG11892|protein_coding|CODING|FBtr0089645||1);INTERGENIC(MODIFIER||||||||||1)]	Body Weight	-0.05942	0.7194	0.564166
Body Weight	N-acetyl-glucosamine 1-phosphate	15741	-0.36154	0.0219	FBgn0004395	3R:18975375-18983584	0.47449	0.0023	3R_21109320_SNP	0.2162	6.51843e-06	8.761e-05	0.00138889	SiteClass[FBgn0051300|CG31300|UPSTREAM|22;FBgn0039313|CG11892|DOWNSTREAM|361],TranscriptAnnot[UPSTREAM(MODIFIER||22||422|CG31300|protein_coding|CODING|FBtr0084824||1);DOWNSTREAM(MODIFIER||361||439|CG11892|protein_coding|CODING|FBtr0089644||1);DOWNSTREAM(MODIFIER||361||439|CG11892|protein_coding|CODING|FBtr0089645||1);INTERGENIC(MODIFIER||||||||||1)]	Body Weight	-0.26115	0.1083	0.564166
Body Weight	N-acetyl-glucosamine 1-phosphate	15741	-0.36154	0.0219	FBgn0085370	2L:18532025-18590342	0.5668	0.0002	3R_21109320_SNP	0.2162	6.51843e-06	2.686e-05	0.00138889	SiteClass[FBgn0051300|CG31300|UPSTREAM|22;FBgn0039313|CG11892|DOWNSTREAM|361],TranscriptAnnot[UPSTREAM(MODIFIER||22||422|CG31300|protein_coding|CODING|FBtr0084824||1);DOWNSTREAM(MODIFIER||361||439|CG11892|protein_coding|CODING|FBtr0089644||1);DOWNSTREAM(MODIFIER||361||439|CG11892|protein_coding|CODING|FBtr0089645||1);INTERGENIC(MODIFIER||||||||||1)]	Body Weight	-0.40478	0.0106	0.564166
Body Weight	N-acetyl-glucosamine 1-phosphate	15741	-0.36154	0.0219	FBgn0039312	3R:21104149-21105568	-0.56761	0.0002	3R_21109320_SNP	0.2162	6.51843e-06	2.652e-06	0.00138889	SiteClass[FBgn0051300|CG31300|UPSTREAM|22;FBgn0039313|CG11892|DOWNSTREAM|361],TranscriptAnnot[UPSTREAM(MODIFIER||22||422|CG31300|protein_coding|CODING|FBtr0084824||1);DOWNSTREAM(MODIFIER||361||439|CG11892|protein_coding|CODING|FBtr0089644||1);DOWNSTREAM(MODIFIER||361||439|CG11892|protein_coding|CODING|FBtr0089645||1);INTERGENIC(MODIFIER||||||||||1)]	Body Weight	-0.16985	0.3013	0.564166
Body Weight	N-acetyl-glucosamine 1-phosphate	15741	-0.36154	0.0219	FBgn0036332	3L:13002499-13004785	0.47429	0.0023	3R_21109320_SNP	0.2162	6.51843e-06	0.0003433	0.00138889	SiteClass[FBgn0051300|CG31300|UPSTREAM|22;FBgn0039313|CG11892|DOWNSTREAM|361],TranscriptAnnot[UPSTREAM(MODIFIER||22||422|CG31300|protein_coding|CODING|FBtr0084824||1);DOWNSTREAM(MODIFIER||361||439|CG11892|protein_coding|CODING|FBtr0089644||1);DOWNSTREAM(MODIFIER||361||439|CG11892|protein_coding|CODING|FBtr0089645||1);INTERGENIC(MODIFIER||||||||||1)]	Body Weight	-0.49719	0.0013	0.564166
Body Weight	N-acetyl-glucosamine 1-phosphate	15741	-0.36154	0.0219	FBgn0033224	2R:3688290-3693890	0.5502	0.0003	3R_21109320_SNP	0.2162	6.51843e-06	0.0009777	0.00138889	SiteClass[FBgn0051300|CG31300|UPSTREAM|22;FBgn0039313|CG11892|DOWNSTREAM|361],TranscriptAnnot[UPSTREAM(MODIFIER||22||422|CG31300|protein_coding|CODING|FBtr0084824||1);DOWNSTREAM(MODIFIER||361||439|CG11892|protein_coding|CODING|FBtr0089644||1);DOWNSTREAM(MODIFIER||361||439|CG11892|protein_coding|CODING|FBtr0089645||1);INTERGENIC(MODIFIER||||||||||1)]	Body Weight	-0.20618	0.2079	0.564166
Body Weight	N-acetyl-glucosamine 1-phosphate	15741	-0.36154	0.0219	FBgn0052380	3L:7367150-7374574	0.55283	0.0003	3R_21109320_SNP	0.2162	6.51843e-06	0.0001436	0.00138889	SiteClass[FBgn0051300|CG31300|UPSTREAM|22;FBgn0039313|CG11892|DOWNSTREAM|361],TranscriptAnnot[UPSTREAM(MODIFIER||22||422|CG31300|protein_coding|CODING|FBtr0084824||1);DOWNSTREAM(MODIFIER||361||439|CG11892|protein_coding|CODING|FBtr0089644||1);DOWNSTREAM(MODIFIER||361||439|CG11892|protein_coding|CODING|FBtr0089645||1);INTERGENIC(MODIFIER||||||||||1)]	Body Weight	0.0418	0.8005	0.564166
Body Weight	N-acetyl-glucosamine 1-phosphate	15741	-0.36154	0.0219	FBgn0020766	2R:9855813-9857407	-0.46134	0.0031	3R_21109320_SNP	0.2162	6.51843e-06	7.594e-06	0.00138889	SiteClass[FBgn0051300|CG31300|UPSTREAM|22;FBgn0039313|CG11892|DOWNSTREAM|361],TranscriptAnnot[UPSTREAM(MODIFIER||22||422|CG31300|protein_coding|CODING|FBtr0084824||1);DOWNSTREAM(MODIFIER||361||439|CG11892|protein_coding|CODING|FBtr0089644||1);DOWNSTREAM(MODIFIER||361||439|CG11892|protein_coding|CODING|FBtr0089645||1);INTERGENIC(MODIFIER||||||||||1)]	Body Weight	0.14444	0.3803	0.564166
Body Weight	N-acetyl-glucosamine 1-phosphate	15741	-0.36154	0.0219	FBgn0037363	3R:1495435-1505652	0.47287	0.0024	3R_21109320_SNP	0.2162	6.51843e-06	5.433e-06	0.00138889	SiteClass[FBgn0051300|CG31300|UPSTREAM|22;FBgn0039313|CG11892|DOWNSTREAM|361],TranscriptAnnot[UPSTREAM(MODIFIER||22||422|CG31300|protein_coding|CODING|FBtr0084824||1);DOWNSTREAM(MODIFIER||361||439|CG11892|protein_coding|CODING|FBtr0089644||1);DOWNSTREAM(MODIFIER||361||439|CG11892|protein_coding|CODING|FBtr0089645||1);INTERGENIC(MODIFIER||||||||||1)]	Body Weight	-0.10264	0.5341	0.564166
Body Weight	N-acetyl-glucosamine 1-phosphate	15741	-0.36154	0.0219	FBgn0083969	3R:25695087-25700881	0.51498	0.0008	3R_21109320_SNP	0.2162	6.51843e-06	0.0001426	0.00138889	SiteClass[FBgn0051300|CG31300|UPSTREAM|22;FBgn0039313|CG11892|DOWNSTREAM|361],TranscriptAnnot[UPSTREAM(MODIFIER||22||422|CG31300|protein_coding|CODING|FBtr0084824||1);DOWNSTREAM(MODIFIER||361||439|CG11892|protein_coding|CODING|FBtr0089644||1);DOWNSTREAM(MODIFIER||361||439|CG11892|protein_coding|CODING|FBtr0089645||1);INTERGENIC(MODIFIER||||||||||1)]	Body Weight	-0.07146	0.6655	0.564166
Body Weight	1-palmitoyl-GPG (16:0)*	45970	-0.36529	0.0205	FBgn0260475	2R:9300274-9302125	-0.49575	0.0013	3R_21851605_SNP	0.3947	9.64184e-06	0.0008694	0.00166667	SiteClass[|||],TranscriptAnnot[INTERGENIC(MODIFIER||||||||||1)]	Body Weight	0.01464	0.9295	0.39153
Body Weight	1-palmitoyl-GPG (16:0)*	45970	-0.36529	0.0205	FBgn0036727	3L:17463227-17467617	-0.57713	0.0001	3R_21851605_SNP	0.3947	9.64184e-06	2.598e-07	0.00166667	SiteClass[|||],TranscriptAnnot[INTERGENIC(MODIFIER||||||||||1)]	Body Weight	-0.07814	0.6363	0.39153
Body Weight	1-palmitoyl-GPG (16:0)*	45970	-0.36529	0.0205	FBgn0051721	2L:10544883-10628054	-0.45709	0.0034	3R_21851605_SNP	0.3947	9.64184e-06	2.688e-05	0.00166667	SiteClass[|||],TranscriptAnnot[INTERGENIC(MODIFIER||||||||||1)]	Body Weight	-0.09849	0.5508	0.39153
Body Weight	gamma-glutamylisoleucine*	34456	-0.34508	0.0292	FBgn0030629	X:15234406-15236150	-0.47988	0.002	3R_22575488_SNP	0.2105	2.63173e-06	6.569e-05	0.000833333	SiteClass[|||],TranscriptAnnot[INTERGENIC(MODIFIER||||||||||1)]	Body Weight	-0.24768	0.1284	0.119791
Body Weight	1,2-dipalmitoyl-GPC (16:0/16:0)	19130	-0.33133	0.0368	FBgn0002719	3R:8538825-8548164	0.48543	0.0017	3R_22606212_SNP	0.4	2.17927e-06	0.00327	0.00357143	SiteClass[|||],TranscriptAnnot[INTERGENIC(MODIFIER||||||||||1)]	Body Weight	-0.11104	0.501	0.382398
Body Weight	1,2-dipalmitoyl-GPC (16:0/16:0)	19130	-0.33133	0.0368	XLOC_007002	2R:6487329-6488160	-0.48522	0.0017	3R_22606212_SNP	0.4	2.17927e-06	0.0009194	0.00357143	SiteClass[|||],TranscriptAnnot[INTERGENIC(MODIFIER||||||||||1)]	Body Weight	0.04808	0.7713	0.382398
Body Weight	1-palmitoyl-2-linoleoyl-GPI (16:0/18:2)	52450	-0.33283	0.0359	FBgn0002719	3R:8538825-8548164	0.483	0.0018	3R_22754503_SNP	0.1795	1.96723e-06	0.0001163	0.000617284	SiteClass[FBgn0015541|sda|INTRON|0],TranscriptAnnot[INTRON(MODIFIER||||1182|sda|protein_coding|CODING|FBtr0112882|3|1);INTRON(MODIFIER||||1071|sda|protein_coding|CODING|FBtr0085066|3|1);INTRON(MODIFIER||||1194|sda|protein_coding|CODING|FBtr0336725|4|1);INTRON(MODIFIER||||1083|sda|protein_coding|CODING|FBtr0305065|4|1)]	Body Weight	-0.11104	0.501	0.0383408
Body Weight	1-palmitoyl-2-palmitoleoyl-GPC (16:0/16:1)*	52470	-0.34578	0.0289	FBgn0002719	3R:8538825-8548164	0.54211	0.0004	3R_22754503_SNP	0.1795	1.40883e-07	0.0001163	0.000555556	SiteClass[FBgn0015541|sda|INTRON|0],TranscriptAnnot[INTRON(MODIFIER||||1182|sda|protein_coding|CODING|FBtr0112882|3|1);INTRON(MODIFIER||||1071|sda|protein_coding|CODING|FBtr0085066|3|1);INTRON(MODIFIER||||1194|sda|protein_coding|CODING|FBtr0336725|4|1);INTRON(MODIFIER||||1083|sda|protein_coding|CODING|FBtr0305065|4|1)]	Body Weight	-0.11104	0.501	0.0383408
Body Weight	1-stearoyl-2-linoleoyl-GPC (18:0/18:2)*	52452	-0.37242	0.018	FBgn0029712	X:4443103-4443990	0.47024	0.0025	3R_23369659_SNP	0.2632	2.92348e-06	0.001045	0.0025	SiteClass[FBgn0046887|Gr98b|DOWNSTREAM|49;FBgn0046886|Gr98c|UPSTREAM|506],TranscriptAnnot[UPSTREAM(MODIFIER||506||408|Gr98c|protein_coding|CODING|FBtr0085187||1);DOWNSTREAM(MODIFIER||49||403|Gr98b|protein_coding|CODING|FBtr0085186||1);INTERGENIC(MODIFIER||||||||||1)]	Body Weight	0.36915	0.0207	0.114992
Body Weight	1-stearoyl-2-linoleoyl-GPC (18:0/18:2)*	52452	-0.37242	0.018	FBgn0001224	3L:9374982-9375865	0.47328	0.0023	3R_23369746_SNP	0.2564	2.107e-06	0.001199	0.0025	SiteClass[FBgn0046887|Gr98b|DOWNSTREAM|136;FBgn0046886|Gr98c|UPSTREAM|419],TranscriptAnnot[UPSTREAM(MODIFIER||419||408|Gr98c|protein_coding|CODING|FBtr0085187||1);DOWNSTREAM(MODIFIER||136||403|Gr98b|protein_coding|CODING|FBtr0085186||1);INTERGENIC(MODIFIER||||||||||1)]	Body Weight	-0.18796	0.2518	0.175737
Body Weight	1-stearoyl-2-linoleoyl-GPC (18:0/18:2)*	52452	-0.37242	0.018	FBgn0001224	3L:9374982-9375865	0.47328	0.0023	3R_23369757_SNP	0.2821	5.77012e-07	0.0003032	0.0025	SiteClass[FBgn0046887|Gr98b|DOWNSTREAM|147;FBgn0046886|Gr98c|UPSTREAM|408],TranscriptAnnot[UPSTREAM(MODIFIER||408||408|Gr98c|protein_coding|CODING|FBtr0085187||1);DOWNSTREAM(MODIFIER||147||403|Gr98b|protein_coding|CODING|FBtr0085186||1);INTERGENIC(MODIFIER||||||||||1)]	Body Weight	-0.18796	0.2518	0.111907
Body Weight	1-stearoyl-2-linoleoyl-GPC (18:0/18:2)*	52452	-0.37242	0.018	FBgn0029712	X:4443103-4443990	0.47024	0.0025	3R_23369757_SNP	0.2821	5.77012e-07	0.001927	0.0025	SiteClass[FBgn0046887|Gr98b|DOWNSTREAM|147;FBgn0046886|Gr98c|UPSTREAM|408],TranscriptAnnot[UPSTREAM(MODIFIER||408||408|Gr98c|protein_coding|CODING|FBtr0085187||1);DOWNSTREAM(MODIFIER||147||403|Gr98b|protein_coding|CODING|FBtr0085186||1);INTERGENIC(MODIFIER||||||||||1)]	Body Weight	0.36915	0.0207	0.111907
Body Weight	1-stearoyl-2-linoleoyl-GPC (18:0/18:2)*	52452	-0.37242	0.018	FBgn0029712	X:4443103-4443990	0.47024	0.0025	3R_23369781_SNP	0.2564	9.84426e-07	0.0007961	0.0025	SiteClass[FBgn0046887|Gr98b|DOWNSTREAM|171;FBgn0046886|Gr98c|UPSTREAM|384],TranscriptAnnot[UPSTREAM(MODIFIER||384||408|Gr98c|protein_coding|CODING|FBtr0085187||1);DOWNSTREAM(MODIFIER||171||403|Gr98b|protein_coding|CODING|FBtr0085186||1);INTERGENIC(MODIFIER||||||||||1)]	Body Weight	0.36915	0.0207	0.117762
Body Weight	1-stearoyl-2-linoleoyl-GPC (18:0/18:2)*	52452	-0.37242	0.018	FBgn0036030	3L:9676679-9689800	-0.4666	0.0028	3R_23369781_SNP	0.2564	9.84426e-07	0.00235	0.0025	SiteClass[FBgn0046887|Gr98b|DOWNSTREAM|171;FBgn0046886|Gr98c|UPSTREAM|384],TranscriptAnnot[UPSTREAM(MODIFIER||384||408|Gr98c|protein_coding|CODING|FBtr0085187||1);DOWNSTREAM(MODIFIER||171||403|Gr98b|protein_coding|CODING|FBtr0085186||1);INTERGENIC(MODIFIER||||||||||1)]	Body Weight	0.21438	0.19	0.117762
Body Weight	1-stearoyl-2-linoleoyl-GPC (18:0/18:2)*	52452	-0.37242	0.018	FBgn0001224	3L:9374982-9375865	0.47328	0.0023	3R_23369781_SNP	0.2564	9.84426e-07	0.002256	0.0025	SiteClass[FBgn0046887|Gr98b|DOWNSTREAM|171;FBgn0046886|Gr98c|UPSTREAM|384],TranscriptAnnot[UPSTREAM(MODIFIER||384||408|Gr98c|protein_coding|CODING|FBtr0085187||1);DOWNSTREAM(MODIFIER||171||403|Gr98b|protein_coding|CODING|FBtr0085186||1);INTERGENIC(MODIFIER||||||||||1)]	Body Weight	-0.18796	0.2518	0.117762
Body Weight	1-palmitoyl-GPG (16:0)*	45970	-0.36529	0.0205	FBgn0260475	2R:9300274-9302125	-0.49575	0.0013	3R_24039620_SNP	0.3077	2.43288e-06	1.77e-06	0.00166667	SiteClass[FBgn0085383|CG34354|INTRON|0],TranscriptAnnot[INTRON(MODIFIER||||431|CG34354|protein_coding|CODING|FBtr0304916|3|1);INTRON(MODIFIER||||431|CG34354|protein_coding|CODING|FBtr0304917|3|1);INTRON(MODIFIER||||550|CG34354|protein_coding|CODING|FBtr0344296|3|1|WARNING_TRANSCRIPT_MULTIPLE_STOP_CODONS)]	Body Weight	0.01464	0.9295	0.125464
Body Weight	1-palmitoyl-GPG (16:0)*	45970	-0.36529	0.0205	FBgn0260932	2R:7773572-7775108	0.51012	0.0009	3R_24039620_SNP	0.3077	2.43288e-06	0.00138	0.00166667	SiteClass[FBgn0085383|CG34354|INTRON|0],TranscriptAnnot[INTRON(MODIFIER||||431|CG34354|protein_coding|CODING|FBtr0304916|3|1);INTRON(MODIFIER||||431|CG34354|protein_coding|CODING|FBtr0304917|3|1);INTRON(MODIFIER||||550|CG34354|protein_coding|CODING|FBtr0344296|3|1|WARNING_TRANSCRIPT_MULTIPLE_STOP_CODONS)]	Body Weight	0.36135	0.0238	0.125464
Body Weight	2-stearoyl-GPE (18:0)*	41220	-0.40131	0.0103	FBgn0028372	2R:15558123-15560982	0.47611	0.0022	3R_24125062_SNP	0.375	3.97785e-06	0.0006047	0.00108696	SiteClass[|||],TranscriptAnnot[INTERGENIC(MODIFIER||||||||||1)]	Body Weight	0.11367	0.4908	0.128927
Body Weight	2-stearoyl-GPE (18:0)*	41220	-0.40131	0.0103	FBgn0036727	3L:17463227-17467617	-0.58968	<.0001	3R_24125062_SNP	0.375	3.97785e-06	0.0001566	0.00108696	SiteClass[|||],TranscriptAnnot[INTERGENIC(MODIFIER||||||||||1)]	Body Weight	-0.07814	0.6363	0.128927
Body Weight	2-stearoyl-GPE (18:0)*	41220	-0.40131	0.0103	XLOC_028011	Uextra:3177610-3178493	0.53644	0.0004	3R_24125062_SNP	0.375	3.97785e-06	0.0005948	0.00108696	SiteClass[|||],TranscriptAnnot[INTERGENIC(MODIFIER||||||||||1)]	Body Weight	-0.03614	0.8271	0.128927
Body Weight	gamma-glutamylmethionine	44872	-0.35053	0.0266	FBgn0004387	3R:23373497-23384867	0.48534	0.0017	3R_25256922_SNP	0.1026	1.28031e-07	0.0006602	0.00333333	SiteClass[FBgn0004369|Ptp99A|SYNONYMOUS_CODING|0],TranscriptAnnot[SYNONYMOUS_CODING(LOW|SILENT|ctG/ctA|L327|1397|Ptp99A|protein_coding|CODING|FBtr0303148|8|1)]	Body Weight	-0.13746	0.404	0.119208
Body Weight	gamma-glutamylisoleucine*	34456	-0.34508	0.0292	FBgn0033756	2R:8513313-8516124	-0.46626	0.0028	3R_25627563_SNP	0.1842	1.40975e-06	0.0002802	0.000833333	SiteClass[FBgn0039697|CG7834|UTR_3_PRIME|0;FBgn0019972|Ice|DOWNSTREAM|257],TranscriptAnnot[UTR_3_PRIME(MODIFIER||108||253|CG7834|protein_coding|CODING|FBtr0085536|2|1);UTR_3_PRIME(MODIFIER||108||253|CG7834|protein_coding|CODING|FBtr0085535|3|1);DOWNSTREAM(MODIFIER||257||339|Ice|protein_coding|CODING|FBtr0085482||1)]	Body Weight	0.20001	0.2222	0.937358
Body Weight	N-acetyl-glucosamine 1-phosphate	15741	-0.36154	0.0219	XLOC_031907	X:12771234-12775701	0.46518	0.0028	3R_25655712_SNP	0.1026	2.92756e-06	0.001048	0.00138889	SiteClass[FBgn0039705|Atg16|INTRON|0],TranscriptAnnot[INTRON(MODIFIER||||604|Atg16|protein_coding|CODING|FBtr0085528|6|1);INTRON(MODIFIER||||419|Atg16|protein_coding|CODING|FBtr0085529|4|1);INTRON(MODIFIER||||445|Atg16|protein_coding|CODING|FBtr0085530|3|1);INTRON(MODIFIER||||612|Atg16|protein_coding|CODING|FBtr0339144|6|1)]	Body Weight	-0.25437	0.1181	0.343183
Body Weight	N-acetyl-glucosamine 1-phosphate	15741	-0.36154	0.0219	FBgn0031694	2L:5266392-5268455	-0.4664	0.0028	3R_25655712_SNP	0.1026	2.92756e-06	0.000342	0.00138889	SiteClass[FBgn0039705|Atg16|INTRON|0],TranscriptAnnot[INTRON(MODIFIER||||604|Atg16|protein_coding|CODING|FBtr0085528|6|1);INTRON(MODIFIER||||419|Atg16|protein_coding|CODING|FBtr0085529|4|1);INTRON(MODIFIER||||445|Atg16|protein_coding|CODING|FBtr0085530|3|1);INTRON(MODIFIER||||612|Atg16|protein_coding|CODING|FBtr0339144|6|1)]	Body Weight	-0.05942	0.7194	0.343183
Body Weight	N-acetyl-glucosamine 1-phosphate	15741	-0.36154	0.0219	FBgn0039312	3R:21104149-21105568	-0.56761	0.0002	3R_25655712_SNP	0.1026	2.92756e-06	0.0002819	0.00138889	SiteClass[FBgn0039705|Atg16|INTRON|0],TranscriptAnnot[INTRON(MODIFIER||||604|Atg16|protein_coding|CODING|FBtr0085528|6|1);INTRON(MODIFIER||||419|Atg16|protein_coding|CODING|FBtr0085529|4|1);INTRON(MODIFIER||||445|Atg16|protein_coding|CODING|FBtr0085530|3|1);INTRON(MODIFIER||||612|Atg16|protein_coding|CODING|FBtr0339144|6|1)]	Body Weight	-0.16985	0.3013	0.343183
Body Weight	N-acetyl-glucosamine 1-phosphate	15741	-0.36154	0.0219	FBgn0039312	3R:21104149-21105568	-0.56761	0.0002	3R_25656472_SNP	0.1053	2.46594e-06	0.0002246	0.00138889	SiteClass[FBgn0039705|Atg16|INTRON|0],TranscriptAnnot[INTRON(MODIFIER||||604|Atg16|protein_coding|CODING|FBtr0085528|6|1);INTRON(MODIFIER||||419|Atg16|protein_coding|CODING|FBtr0085529|4|1);INTRON(MODIFIER||||445|Atg16|protein_coding|CODING|FBtr0085530|3|1);INTRON(MODIFIER||||612|Atg16|protein_coding|CODING|FBtr0339144|6|1)]	Body Weight	-0.16985	0.3013	0.350094
Body Weight	N-acetyl-glucosamine 1-phosphate	15741	-0.36154	0.0219	FBgn0020766	2R:9855813-9857407	-0.46134	0.0031	3R_25656472_SNP	0.1053	2.46594e-06	0.001156	0.00138889	SiteClass[FBgn0039705|Atg16|INTRON|0],TranscriptAnnot[INTRON(MODIFIER||||604|Atg16|protein_coding|CODING|FBtr0085528|6|1);INTRON(MODIFIER||||419|Atg16|protein_coding|CODING|FBtr0085529|4|1);INTRON(MODIFIER||||445|Atg16|protein_coding|CODING|FBtr0085530|3|1);INTRON(MODIFIER||||612|Atg16|protein_coding|CODING|FBtr0339144|6|1)]	Body Weight	0.14444	0.3803	0.350094
Body Weight	N-acetyl-glucosamine 1-phosphate	15741	-0.36154	0.0219	FBgn0031694	2L:5266392-5268455	-0.4664	0.0028	3R_25656472_SNP	0.1053	2.46594e-06	0.0004089	0.00138889	SiteClass[FBgn0039705|Atg16|INTRON|0],TranscriptAnnot[INTRON(MODIFIER||||604|Atg16|protein_coding|CODING|FBtr0085528|6|1);INTRON(MODIFIER||||419|Atg16|protein_coding|CODING|FBtr0085529|4|1);INTRON(MODIFIER||||445|Atg16|protein_coding|CODING|FBtr0085530|3|1);INTRON(MODIFIER||||612|Atg16|protein_coding|CODING|FBtr0339144|6|1)]	Body Weight	-0.05942	0.7194	0.350094
Body Weight	N-acetyl-glucosamine 1-phosphate	15741	-0.36154	0.0219	XLOC_031907	X:12771234-12775701	0.46518	0.0028	3R_25656472_SNP	0.1053	2.46594e-06	0.001294	0.00138889	SiteClass[FBgn0039705|Atg16|INTRON|0],TranscriptAnnot[INTRON(MODIFIER||||604|Atg16|protein_coding|CODING|FBtr0085528|6|1);INTRON(MODIFIER||||419|Atg16|protein_coding|CODING|FBtr0085529|4|1);INTRON(MODIFIER||||445|Atg16|protein_coding|CODING|FBtr0085530|3|1);INTRON(MODIFIER||||612|Atg16|protein_coding|CODING|FBtr0339144|6|1)]	Body Weight	-0.25437	0.1181	0.350094
Body Weight	2-stearoyl-GPE (18:0)*	41220	-0.40131	0.0103	FBgn0031184	X:21849019-21851327	-0.49069	0.0015	3R_25692250_SNP	0.1026	4.12302e-06	0.0002424	0.00108696	SiteClass[FBgn0039714|Zip99C|INTRON|0],TranscriptAnnot[UTR_5_PRIME(MODIFIER||1261||355|Zip99C|protein_coding|CODING|FBtr0303032|1|1);UPSTREAM(MODIFIER||348||355|Zip99C|protein_coding|CODING|FBtr0089921||1);INTRON(MODIFIER||||355|Zip99C|protein_coding|CODING|FBtr0089922|1|1);INTRON(MODIFIER||||355|Zip99C|protein_coding|CODING|FBtr0089923|1|1);INTRON(MODIFIER||||355|Zip99C|protein_coding|CODING|FBt…	Body Weight	-0.05243	0.7512	0.222643
Body Weight	2-stearoyl-GPE (18:0)*	41220	-0.40131	0.0103	FBgn0261563	2L:14263027-14328262	-0.47753	0.0021	3R_25692250_SNP	0.1026	4.12302e-06	0.0006466	0.00108696	SiteClass[FBgn0039714|Zip99C|INTRON|0],TranscriptAnnot[UTR_5_PRIME(MODIFIER||1261||355|Zip99C|protein_coding|CODING|FBtr0303032|1|1);UPSTREAM(MODIFIER||348||355|Zip99C|protein_coding|CODING|FBtr0089921||1);INTRON(MODIFIER||||355|Zip99C|protein_coding|CODING|FBtr0089922|1|1);INTRON(MODIFIER||||355|Zip99C|protein_coding|CODING|FBtr0089923|1|1);INTRON(MODIFIER||||355|Zip99C|protein_coding|CODING|FBt…	Body Weight	0.17126	0.2972	0.222643
Body Weight	2-stearoyl-GPE (18:0)*	41220	-0.40131	0.0103	XLOC_027415	U:8561290-8680119	0.5168	0.0008	3R_25692250_SNP	0.1026	4.12302e-06	0.000442	0.00108696	SiteClass[FBgn0039714|Zip99C|INTRON|0],TranscriptAnnot[UTR_5_PRIME(MODIFIER||1261||355|Zip99C|protein_coding|CODING|FBtr0303032|1|1);UPSTREAM(MODIFIER||348||355|Zip99C|protein_coding|CODING|FBtr0089921||1);INTRON(MODIFIER||||355|Zip99C|protein_coding|CODING|FBtr0089922|1|1);INTRON(MODIFIER||||355|Zip99C|protein_coding|CODING|FBtr0089923|1|1);INTRON(MODIFIER||||355|Zip99C|protein_coding|CODING|FBt…	Body Weight	-0.02095	0.8993	0.222643
Body Weight	N-acetyl-glucosamine 1-phosphate	15741	-0.36154	0.0219	FBgn0085370	2L:18532025-18590342	0.5668	0.0002	3R_26168980_INS	0.1389	9.10969e-06	1.116e-05	0.00138889	SiteClass[FBgn0010113|hdc|INTRON|0],TranscriptAnnot[INTRON(MODIFIER||||650|hdc|protein_coding|CODING|FBtr0085619|2|1);INTRON(MODIFIER||||1080|hdc|protein_coding|CODING|FBtr0085621|2|1);INTRON(MODIFIER||||650|hdc|protein_coding|CODING|FBtr0330311|2|1)]	Body Weight	-0.40478	0.0106	0.700755
Body Weight	N-acetyl-glucosamine 1-phosphate	15741	-0.36154	0.0219	FBgn0039312	3R:21104149-21105568	-0.56761	0.0002	3R_26168980_INS	0.1389	9.10969e-06	7.994e-05	0.00138889	SiteClass[FBgn0010113|hdc|INTRON|0],TranscriptAnnot[INTRON(MODIFIER||||650|hdc|protein_coding|CODING|FBtr0085619|2|1);INTRON(MODIFIER||||1080|hdc|protein_coding|CODING|FBtr0085621|2|1);INTRON(MODIFIER||||650|hdc|protein_coding|CODING|FBtr0330311|2|1)]	Body Weight	-0.16985	0.3013	0.700755
Body Weight	N-acetyl-glucosamine 1-phosphate	15741	-0.36154	0.0219	FBgn0036332	3L:13002499-13004785	0.47429	0.0023	3R_26168980_INS	0.1389	9.10969e-06	0.0002431	0.00138889	SiteClass[FBgn0010113|hdc|INTRON|0],TranscriptAnnot[INTRON(MODIFIER||||650|hdc|protein_coding|CODING|FBtr0085619|2|1);INTRON(MODIFIER||||1080|hdc|protein_coding|CODING|FBtr0085621|2|1);INTRON(MODIFIER||||650|hdc|protein_coding|CODING|FBtr0330311|2|1)]	Body Weight	-0.49719	0.0013	0.700755
Body Weight	N-acetyl-glucosamine 1-phosphate	15741	-0.36154	0.0219	XLOC_001893	2L:13886803-13887277	0.55789	0.0002	3R_26168980_INS	0.1389	9.10969e-06	0.000485	0.00138889	SiteClass[FBgn0010113|hdc|INTRON|0],TranscriptAnnot[INTRON(MODIFIER||||650|hdc|protein_coding|CODING|FBtr0085619|2|1);INTRON(MODIFIER||||1080|hdc|protein_coding|CODING|FBtr0085621|2|1);INTRON(MODIFIER||||650|hdc|protein_coding|CODING|FBtr0330311|2|1)]	Body Weight	-0.05982	0.7175	0.700755
Body Weight	N-acetyl-glucosamine 1-phosphate	15741	-0.36154	0.0219	FBgn0267035	X:2067513-2069888	-0.45283	0.0038	3R_26168980_INS	0.1389	9.10969e-06	0.0003314	0.00138889	SiteClass[FBgn0010113|hdc|INTRON|0],TranscriptAnnot[INTRON(MODIFIER||||650|hdc|protein_coding|CODING|FBtr0085619|2|1);INTRON(MODIFIER||||1080|hdc|protein_coding|CODING|FBtr0085621|2|1);INTRON(MODIFIER||||650|hdc|protein_coding|CODING|FBtr0330311|2|1)]	Body Weight	-0.03016	0.8554	0.700755
Body Weight	N-acetyl-glucosamine 1-phosphate	15741	-0.36154	0.0219	FBgn0020766	2R:9855813-9857407	-0.46134	0.0031	3R_26168980_INS	0.1389	9.10969e-06	0.0004264	0.00138889	SiteClass[FBgn0010113|hdc|INTRON|0],TranscriptAnnot[INTRON(MODIFIER||||650|hdc|protein_coding|CODING|FBtr0085619|2|1);INTRON(MODIFIER||||1080|hdc|protein_coding|CODING|FBtr0085621|2|1);INTRON(MODIFIER||||650|hdc|protein_coding|CODING|FBtr0330311|2|1)]	Body Weight	0.14444	0.3803	0.700755
Body Weight	2-stearoyl-GPE (18:0)*	41220	-0.40131	0.0103	FBgn0031184	X:21849019-21851327	-0.49069	0.0015	3R_26185568_SNP	0.1081	4.80056e-06	8.384e-05	0.00108696	SiteClass[FBgn0010113|hdc|INTRON|0],TranscriptAnnot[INTRON(MODIFIER||||650|hdc|protein_coding|CODING|FBtr0085619|3|1);INTRON(MODIFIER||||201|hdc|protein_coding|CODING|FBtr0085620|2|1);INTRON(MODIFIER||||1080|hdc|protein_coding|CODING|FBtr0085621|3|1);INTRON(MODIFIER||||650|hdc|protein_coding|CODING|FBtr0330311|3|1)]	Body Weight	-0.05243	0.7512	0.214438
Body Weight	2-stearoyl-GPE (18:0)*	41220	-0.40131	0.0103	XLOC_027415	U:8561290-8680119	0.5168	0.0008	3R_26185568_SNP	0.1081	4.80056e-06	0.0005966	0.00108696	SiteClass[FBgn0010113|hdc|INTRON|0],TranscriptAnnot[INTRON(MODIFIER||||650|hdc|protein_coding|CODING|FBtr0085619|3|1);INTRON(MODIFIER||||201|hdc|protein_coding|CODING|FBtr0085620|2|1);INTRON(MODIFIER||||1080|hdc|protein_coding|CODING|FBtr0085621|3|1);INTRON(MODIFIER||||650|hdc|protein_coding|CODING|FBtr0330311|3|1)]	Body Weight	-0.02095	0.8993	0.214438
Body Weight	gamma-glutamylisoleucine*	34456	-0.34508	0.0292	FBgn0033756	2R:8513313-8516124	-0.46626	0.0028	3R_26293064_SNP	0.1026	9.41978e-06	1.974e-05	0.000833333	SiteClass[FBgn0039776|PH4alphaEFB|INTRON|0],TranscriptAnnot[INTRON(MODIFIER||||550|PH4alphaEFB|protein_coding|CODING|FBtr0085650|1|1)]	Body Weight	0.20001	0.2222	0.438999
Body Weight	gamma-glutamylisoleucine*	34456	-0.34508	0.0292	FBgn0263482	2R:6424455-6424625	-0.60165	<.0001	3R_26297682_SNP	0.1081	5.92803e-06	0.0002581	0.000833333	SiteClass[FBgn0039776|PH4alphaEFB|INTRON|0],TranscriptAnnot[INTRON(MODIFIER||||550|PH4alphaEFB|protein_coding|CODING|FBtr0085650|1|1)]	Body Weight	0.13148	0.4249	0.618236
Body Weight	gamma-glutamylisoleucine*	34456	-0.34508	0.0292	FBgn0263482	2R:6424455-6424625	-0.60165	<.0001	3R_26297684_SNP	0.1053	4.95841e-06	0.0001966	0.000833333	SiteClass[FBgn0039776|PH4alphaEFB|INTRON|0],TranscriptAnnot[INTRON(MODIFIER||||550|PH4alphaEFB|protein_coding|CODING|FBtr0085650|1|1)]	Body Weight	0.13148	0.4249	0.556244
Body Weight	gamma-glutamylisoleucine*	34456	-0.34508	0.0292	FBgn0033756	2R:8513313-8516124	-0.46626	0.0028	3R_26297992_SNP	0.1282	8.20465e-06	2.477e-05	0.000833333	SiteClass[FBgn0039776|PH4alphaEFB|INTRON|0],TranscriptAnnot[INTRON(MODIFIER||||550|PH4alphaEFB|protein_coding|CODING|FBtr0085650|1|1)]	Body Weight	0.20001	0.2222	0.368727
Body Weight	gamma-glutamylisoleucine*	34456	-0.34508	0.0292	FBgn0033756	2R:8513313-8516124	-0.46626	0.0028	3R_26305867_SNP	0.1026	2.30535e-06	0.0007094	0.000833333	SiteClass[FBgn0039776|PH4alphaEFB|INTRON|0],TranscriptAnnot[INTRON(MODIFIER||||550|PH4alphaEFB|protein_coding|CODING|FBtr0085650|4|1)]	Body Weight	0.20001	0.2222	0.526104
Body Weight	gamma-glutamylisoleucine*	34456	-0.34508	0.0292	FBgn0263482	2R:6424455-6424625	-0.60165	<.0001	3R_26305867_SNP	0.1026	2.30535e-06	0.0001498	0.000833333	SiteClass[FBgn0039776|PH4alphaEFB|INTRON|0],TranscriptAnnot[INTRON(MODIFIER||||550|PH4alphaEFB|protein_coding|CODING|FBtr0085650|4|1)]	Body Weight	0.13148	0.4249	0.526104
Body Weight	glycerophosphoinositol*	47155	0.36848	0.0193	FBgn0034999	2R:20181620-20185634	0.4504	0.004	3R_26331511_SNP	0.45	6.45155e-06	0.001726	0.0025	SiteClass[FBgn0051014|PH4alphaSG1|UPSTREAM|128;FBgn0039782|CG15539|UPSTREAM|198],TranscriptAnnot[UPSTREAM(MODIFIER||198||386|CG15539|protein_coding|CODING|FBtr0085655||1);UPSTREAM(MODIFIER||198||509|CG15539|protein_coding|CODING|FBtr0110859||1);UPSTREAM(MODIFIER||198||508|CG15539|protein_coding|CODING|FBtr0345121||1);UPSTREAM(MODIFIER||128||540|PH4alphaSG1|protein_coding|CODING|FBtr0085686||1);IN…	Body Weight	0.20264	0.216	0.0627312
Body Weight	2-stearoyl-GPE (18:0)*	41220	-0.40131	0.0103	XLOC_015512	3L:23992514-23993799	-0.48846	0.0016	3R_3050926_SNP	0.1282	8.89431e-06	0.0005526	0.00108696	SiteClass[FBgn0037487|CG14608|UTR_5_PRIME|0],TranscriptAnnot[UTR_5_PRIME(MODIFIER||27||1137|CG14608|protein_coding|CODING|FBtr0303219|2|1)]	Body Weight	0.12098	0.4632	0.0304581
Body Weight	2-stearoyl-GPE (18:0)*	41220	-0.40131	0.0103	FBgn0039883	3R:27638331-27672292	0.46437	0.0029	3R_3050926_SNP	0.1282	8.89431e-06	0.0007639	0.00108696	SiteClass[FBgn0037487|CG14608|UTR_5_PRIME|0],TranscriptAnnot[UTR_5_PRIME(MODIFIER||27||1137|CG14608|protein_coding|CODING|FBtr0303219|2|1)]	Body Weight	-0.09687	0.5574	0.0304581
Body Weight	1-palmitoyl-2-linoleoyl-GPI (16:0/18:2)	52450	-0.33283	0.0359	FBgn0085419	2R:14427090-14436474	-0.47328	0.0023	3R_5318398_SNP	0.2564	1.05922e-06	0.0004362	0.000617284	SiteClass[FBgn0037698|CG16779|INTRON|0],TranscriptAnnot[INTRON(MODIFIER||||1980|CG16779|protein_coding|CODING|FBtr0082125|1|1);INTRON(MODIFIER||||1980|CG16779|protein_coding|CODING|FBtr0331349|1|1);INTRON(MODIFIER||||1946|CG16779|protein_coding|CODING|FBtr0331350|1|1);INTRON(MODIFIER||||1795|CG16779|protein_coding|CODING|FBtr0331351|1|1);INTRON(MODIFIER||||1980|CG16779|protein_coding|CODING|FBtr0…	Body Weight	-0.033	0.8419	0.0596882
Body Weight	1-stearoyl-GPE (18:0)	42398	-0.38049	0.0154	FBgn0051547	3R:1315227-1328424	0.483	0.0018	3R_5700514_SNP	0.1026	8.38845e-06	0.0007411	0.000943396	SiteClass[FBgn0267336|Glut4EF|UTR_5_PRIME|0],TranscriptAnnot[UTR_5_PRIME(MODIFIER||883||300|Glut4EF|protein_coding|CODING|FBtr0114581|1|1);UTR_5_PRIME(MODIFIER||883||361|Glut4EF|protein_coding|CODING|FBtr0114582|1|1);UTR_5_PRIME(MODIFIER||883||950|Glut4EF|protein_coding|CODING|FBtr0333685|1|1);UTR_5_PRIME(MODIFIER||883||741|Glut4EF|protein_coding|CODING|FBtr0333686|1|1);UTR_5_PRIME(MODIFIER||883|…	Body Weight	-0.18766	0.2526	0.134269
Body Weight	1-stearoyl-GPE (18:0)	42398	-0.38049	0.0154	FBgn0261563	2L:14263027-14328262	-0.46457	0.0029	3R_5700514_SNP	0.1026	8.38845e-06	0.0008075	0.000943396	SiteClass[FBgn0267336|Glut4EF|UTR_5_PRIME|0],TranscriptAnnot[UTR_5_PRIME(MODIFIER||883||300|Glut4EF|protein_coding|CODING|FBtr0114581|1|1);UTR_5_PRIME(MODIFIER||883||361|Glut4EF|protein_coding|CODING|FBtr0114582|1|1);UTR_5_PRIME(MODIFIER||883||950|Glut4EF|protein_coding|CODING|FBtr0333685|1|1);UTR_5_PRIME(MODIFIER||883||741|Glut4EF|protein_coding|CODING|FBtr0333686|1|1);UTR_5_PRIME(MODIFIER||883|…	Body Weight	0.17126	0.2972	0.134269
Body Weight	1-stearoyl-GPE (18:0)	42398	-0.38049	0.0154	FBgn0031515	2L:3291245-3294706	0.47186	0.0024	3R_5700514_SNP	0.1026	8.38845e-06	0.0006494	0.000943396	SiteClass[FBgn0267336|Glut4EF|UTR_5_PRIME|0],TranscriptAnnot[UTR_5_PRIME(MODIFIER||883||300|Glut4EF|protein_coding|CODING|FBtr0114581|1|1);UTR_5_PRIME(MODIFIER||883||361|Glut4EF|protein_coding|CODING|FBtr0114582|1|1);UTR_5_PRIME(MODIFIER||883||950|Glut4EF|protein_coding|CODING|FBtr0333685|1|1);UTR_5_PRIME(MODIFIER||883||741|Glut4EF|protein_coding|CODING|FBtr0333686|1|1);UTR_5_PRIME(MODIFIER||883|…	Body Weight	-0.20203	0.2174	0.134269
Body Weight	1-stearoyl-GPE (18:0)	42398	-0.38049	0.0154	XLOC_018870	3L:23605963-23612500	0.46053	0.0032	3R_6339151_SNP	0.1053	6.95843e-06	0.0007859	0.000943396	SiteClass[FBgn0001235|hth|INTRON|0;FBgn0263547|mir-4944|UPSTREAM|296],TranscriptAnnot[UPSTREAM(MODIFIER||373|||mir-4944|miRNA|NON_CODING|FBtr0309665||1);UPSTREAM(MODIFIER||333|||mir-4944|miRNA|NON_CODING|FBtr0309664||1);UPSTREAM(MODIFIER||296|||mir-4944|pre_miRNA|NON_CODING|FBtr0309663||1);INTRON(MODIFIER||||487|hth|protein_coding|CODING|FBtr0082255|12|1);INTRON(MODIFIER||||472|hth|protein_coding…	Body Weight	-0.29232	0.0709	0.059665
Body Weight	N-acetyl-glucosamine 1-phosphate	15741	-0.36154	0.0219	FBgn0083969	3R:25695087-25700881	0.51498	0.0008	3R_9119732_SNP	0.1795	2.74788e-06	0.001257	0.00138889	SiteClass[FBgn0038135|CG8773|UPSTREAM|738;FBgn0038134|wntD|UPSTREAM|812],TranscriptAnnot[UPSTREAM(MODIFIER||812||309|wntD|protein_coding|CODING|FBtr0082775||1);UPSTREAM(MODIFIER||738||994|CG8773|protein_coding|CODING|FBtr0290037||1);INTERGENIC(MODIFIER||||||||||1)]	Body Weight	-0.07146	0.6655	0.2482
Body Weight	N-acetyl-glucosamine 1-phosphate	15741	-0.36154	0.0219	FBgn0031694	2L:5266392-5268455	-0.4664	0.0028	3R_9119732_SNP	0.1795	2.74788e-06	0.0003213	0.00138889	SiteClass[FBgn0038135|CG8773|UPSTREAM|738;FBgn0038134|wntD|UPSTREAM|812],TranscriptAnnot[UPSTREAM(MODIFIER||812||309|wntD|protein_coding|CODING|FBtr0082775||1);UPSTREAM(MODIFIER||738||994|CG8773|protein_coding|CODING|FBtr0290037||1);INTERGENIC(MODIFIER||||||||||1)]	Body Weight	-0.05942	0.7194	0.2482
Body Weight	N-acetyl-glucosamine 1-phosphate	15741	-0.36154	0.0219	FBgn0003249	3R:15906782-15908172	-0.46336	0.003	3R_9119732_SNP	0.1795	2.74788e-06	0.0003055	0.00138889	SiteClass[FBgn0038135|CG8773|UPSTREAM|738;FBgn0038134|wntD|UPSTREAM|812],TranscriptAnnot[UPSTREAM(MODIFIER||812||309|wntD|protein_coding|CODING|FBtr0082775||1);UPSTREAM(MODIFIER||738||994|CG8773|protein_coding|CODING|FBtr0290037||1);INTERGENIC(MODIFIER||||||||||1)]	Body Weight	0.04504	0.7854	0.2482
Body Weight	N-acetyl-glucosamine 1-phosphate	15741	-0.36154	0.0219	FBgn0031694	2L:5266392-5268455	-0.4664	0.0028	3R_9220798_SNP	0.1842	5.12716e-07	0.0002457	0.00138889	SiteClass[FBgn0038147|CCHa2|UTR_5_PRIME|0],TranscriptAnnot[UTR_5_PRIME(MODIFIER||3136||136|CCHa2|protein_coding|CODING|FBtr0082762|1|1)]	Body Weight	-0.05942	0.7194	0.92131
Body Weight	N-acetyl-glucosamine 1-phosphate	15741	-0.36154	0.0219	FBgn0039312	3R:21104149-21105568	-0.56761	0.0002	3R_9220798_SNP	0.1842	5.12716e-07	0.0005368	0.00138889	SiteClass[FBgn0038147|CCHa2|UTR_5_PRIME|0],TranscriptAnnot[UTR_5_PRIME(MODIFIER||3136||136|CCHa2|protein_coding|CODING|FBtr0082762|1|1)]	Body Weight	-0.16985	0.3013	0.92131
Body Weight	N-acetyl-glucosamine 1-phosphate	15741	-0.36154	0.0219	FBgn0085337	3R:8914964-8915803	-0.46802	0.0027	3R_9220798_SNP	0.1842	5.12716e-07	0.001202	0.00138889	SiteClass[FBgn0038147|CCHa2|UTR_5_PRIME|0],TranscriptAnnot[UTR_5_PRIME(MODIFIER||3136||136|CCHa2|protein_coding|CODING|FBtr0082762|1|1)]	Body Weight	0.10132	0.5394	0.92131
Body Weight	N-acetyl-glucosamine 1-phosphate	15741	-0.36154	0.0219	FBgn0031097	X:20110929-20114283	-0.49555	0.0013	3R_9224091_SNP	0.2105	3.82611e-06	0.0005067	0.00138889	SiteClass[FBgn0038149|CG9796|DOWNSTREAM|157;FBgn0038148|CG14377|DOWNSTREAM|172],TranscriptAnnot[UTR_3_PRIME(MODIFIER||185||105|CG14377|protein_coding|CODING|FBtr0082756|1|1);DOWNSTREAM(MODIFIER||157||250|CG9796|protein_coding|CODING|FBtr0082760||1);DOWNSTREAM(MODIFIER||172||105|CG14377|protein_coding|CODING|FBtr0335458||1)]	Body Weight	0.16367	0.3194	0.589834
Body Weight	N-acetyl-glucosamine 1-phosphate	15741	-0.36154	0.0219	FBgn0085337	3R:8914964-8915803	-0.46802	0.0027	3R_9224091_SNP	0.2105	3.82611e-06	0.001065	0.00138889	SiteClass[FBgn0038149|CG9796|DOWNSTREAM|157;FBgn0038148|CG14377|DOWNSTREAM|172],TranscriptAnnot[UTR_3_PRIME(MODIFIER||185||105|CG14377|protein_coding|CODING|FBtr0082756|1|1);DOWNSTREAM(MODIFIER||157||250|CG9796|protein_coding|CODING|FBtr0082760||1);DOWNSTREAM(MODIFIER||172||105|CG14377|protein_coding|CODING|FBtr0335458||1)]	Body Weight	0.10132	0.5394	0.589834
Body Weight	N-acetyl-glucosamine 1-phosphate	15741	-0.36154	0.0219	FBgn0083969	3R:25695087-25700881	0.51498	0.0008	3R_9224091_SNP	0.2105	3.82611e-06	0.001296	0.00138889	SiteClass[FBgn0038149|CG9796|DOWNSTREAM|157;FBgn0038148|CG14377|DOWNSTREAM|172],TranscriptAnnot[UTR_3_PRIME(MODIFIER||185||105|CG14377|protein_coding|CODING|FBtr0082756|1|1);DOWNSTREAM(MODIFIER||157||250|CG9796|protein_coding|CODING|FBtr0082760||1);DOWNSTREAM(MODIFIER||172||105|CG14377|protein_coding|CODING|FBtr0335458||1)]	Body Weight	-0.07146	0.6655	0.589834
Body Weight	N-acetyl-glucosamine 1-phosphate	15741	-0.36154	0.0219	FBgn0031694	2L:5266392-5268455	-0.4664	0.0028	3R_9224091_SNP	0.2105	3.82611e-06	9.315e-05	0.00138889	SiteClass[FBgn0038149|CG9796|DOWNSTREAM|157;FBgn0038148|CG14377|DOWNSTREAM|172],TranscriptAnnot[UTR_3_PRIME(MODIFIER||185||105|CG14377|protein_coding|CODING|FBtr0082756|1|1);DOWNSTREAM(MODIFIER||157||250|CG9796|protein_coding|CODING|FBtr0082760||1);DOWNSTREAM(MODIFIER||172||105|CG14377|protein_coding|CODING|FBtr0335458||1)]	Body Weight	-0.05942	0.7194	0.589834
Body Weight	N-acetyl-glucosamine 1-phosphate	15741	-0.36154	0.0219	FBgn0039312	3R:21104149-21105568	-0.56761	0.0002	3R_9224091_SNP	0.2105	3.82611e-06	0.000382	0.00138889	SiteClass[FBgn0038149|CG9796|DOWNSTREAM|157;FBgn0038148|CG14377|DOWNSTREAM|172],TranscriptAnnot[UTR_3_PRIME(MODIFIER||185||105|CG14377|protein_coding|CODING|FBtr0082756|1|1);DOWNSTREAM(MODIFIER||157||250|CG9796|protein_coding|CODING|FBtr0082760||1);DOWNSTREAM(MODIFIER||172||105|CG14377|protein_coding|CODING|FBtr0335458||1)]	Body Weight	-0.16985	0.3013	0.589834
Body Weight	1-stearoyl-GPE (18:0)	42398	-0.38049	0.0154	FBgn0051547	3R:1315227-1328424	0.483	0.0018	X_11706812_SNP	0.1026	6.93063e-06	0.0007435	0.000943396	SiteClass[FBgn0030336|CG1578|INTRON|0],TranscriptAnnot[INTRON(MODIFIER||||901|CG1578|protein_coding|CODING|FBtr0073607|4|1);INTRON(MODIFIER||||901|CG1578|protein_coding|CODING|FBtr0339749|4|1);INTRON(MODIFIER||||901|CG1578|protein_coding|CODING|FBtr0345160|3|1)]	Body Weight	-0.18766	0.2526	0.0332003
Body Weight	2-stearoyl-GPE (18:0)*	41220	-0.40131	0.0103	XLOC_015512	3L:23992514-23993799	-0.48846	0.0016	X_11706812_SNP	0.1026	4.01647e-06	0.0003112	0.00108696	SiteClass[FBgn0030336|CG1578|INTRON|0],TranscriptAnnot[INTRON(MODIFIER||||901|CG1578|protein_coding|CODING|FBtr0073607|4|1);INTRON(MODIFIER||||901|CG1578|protein_coding|CODING|FBtr0339749|4|1);INTRON(MODIFIER||||901|CG1578|protein_coding|CODING|FBtr0345160|3|1)]	Body Weight	0.12098	0.4632	0.0332003
Body Weight	1-stearoyl-GPE (18:0)	42398	-0.38049	0.0154	XLOC_015512	3L:23992514-23993799	-0.51903	0.0007	X_11706812_SNP	0.1026	6.93063e-06	0.0003112	0.000943396	SiteClass[FBgn0030336|CG1578|INTRON|0],TranscriptAnnot[INTRON(MODIFIER||||901|CG1578|protein_coding|CODING|FBtr0073607|4|1);INTRON(MODIFIER||||901|CG1578|protein_coding|CODING|FBtr0339749|4|1);INTRON(MODIFIER||||901|CG1578|protein_coding|CODING|FBtr0345160|3|1)]	Body Weight	0.12098	0.4632	0.0332003
Body Weight	2-stearoyl-GPE (18:0)*	41220	-0.40131	0.0103	XLOC_027415	U:8561290-8680119	0.5168	0.0008	X_11706812_SNP	0.1026	4.01647e-06	3.124e-05	0.00108696	SiteClass[FBgn0030336|CG1578|INTRON|0],TranscriptAnnot[INTRON(MODIFIER||||901|CG1578|protein_coding|CODING|FBtr0073607|4|1);INTRON(MODIFIER||||901|CG1578|protein_coding|CODING|FBtr0339749|4|1);INTRON(MODIFIER||||901|CG1578|protein_coding|CODING|FBtr0345160|3|1)]	Body Weight	-0.02095	0.8993	0.0332003
Body Weight	1-stearoyl-GPE (18:0)	42398	-0.38049	0.0154	FBgn0031117	X:20338482-20340823	-0.58016	0.0001	X_11706812_SNP	0.1026	6.93063e-06	0.0004265	0.000943396	SiteClass[FBgn0030336|CG1578|INTRON|0],TranscriptAnnot[INTRON(MODIFIER||||901|CG1578|protein_coding|CODING|FBtr0073607|4|1);INTRON(MODIFIER||||901|CG1578|protein_coding|CODING|FBtr0339749|4|1);INTRON(MODIFIER||||901|CG1578|protein_coding|CODING|FBtr0345160|3|1)]	Body Weight	-0.03178	0.8477	0.0332003
Body Weight	histamine	1574	-0.38248	0.0149	FBgn0031150	X:20924990-20953418	-0.50013	0.0012	X_11742936_SNP	0.1212	8.01858e-06	0.0005092	0.00172414	SiteClass[FBgn0267179|CR45619|DOWNSTREAM|874],TranscriptAnnot[DOWNSTREAM(MODIFIER||874|||CR45619|ncRNA|NON_CODING|FBtr0346306||1);INTERGENIC(MODIFIER||||||||||1)]	Body Weight	0.14717	0.3713	0.00728722
Body Weight	histamine	1574	-0.38248	0.0149	FBgn0031150	X:20924990-20953418	-0.50013	0.0012	X_11742942_SNP	0.1471	2.00811e-06	0.000334	0.00172414	SiteClass[FBgn0267179|CR45619|DOWNSTREAM|868],TranscriptAnnot[DOWNSTREAM(MODIFIER||868|||CR45619|ncRNA|NON_CODING|FBtr0346306||1);INTERGENIC(MODIFIER||||||||||1)]	Body Weight	0.14717	0.3713	0.00660956
Body Weight	histamine	1574	-0.38248	0.0149	XLOC_011947	2RHet:1285029-1285725	0.49496	0.0014	X_11742942_SNP	0.1471	2.00811e-06	0.0009153	0.00172414	SiteClass[FBgn0267179|CR45619|DOWNSTREAM|868],TranscriptAnnot[DOWNSTREAM(MODIFIER||868|||CR45619|ncRNA|NON_CODING|FBtr0346306||1);INTERGENIC(MODIFIER||||||||||1)]	Body Weight	-0.28837	0.075	0.00660956
Body Weight	gamma-glutamylglutamine	2730	-0.33884	0.0325	FBgn0036787	3L:18455057-18456263	-0.7166	<.0001	X_13085644_SNP	0.1538	4.22501e-07	0.0001289	0.00357143	SiteClass[FBgn0030459|CG12723|NON_SYNONYMOUS_CODING|0],TranscriptAnnot[NON_SYNONYMOUS_CODING(MODERATE|MISSENSE|gaT/gaG|D54E|625|CG12723|protein_coding|CODING|FBtr0073738|1|1)]	Body Weight	0.1909	0.2444	0.289576
Body Weight	1-palmitoyl-2-palmitoleoyl-GPC (16:0/16:1)*	52470	-0.34578	0.0289	FBgn0002719	3R:8538825-8548164	0.54211	0.0004	X_13615362_SNP	0.225	8.59891e-06	0.0003407	0.000555556	SiteClass[FBgn0030514|CG9941|SYNONYMOUS_CODING|0;FBgn0002878|mus101|UPSTREAM|917],TranscriptAnnot[SYNONYMOUS_CODING(LOW|SILENT|aaG/aaA|K116|789|CG9941|protein_coding|CODING|FBtr0073843|1|1);UPSTREAM(MODIFIER||917||1425|mus101|protein_coding|CODING|FBtr0073817||1)]	Body Weight	-0.11104	0.501	0.0570229
Body Weight	1-palmitoyl-2-palmitoleoyl-GPC (16:0/16:1)*	52470	-0.34578	0.0289	FBgn0002719	3R:8538825-8548164	0.54211	0.0004	X_13616270_SNP	0.2632	3.34589e-06	0.0002006	0.000555556	SiteClass[FBgn0002878|mus101|UPSTREAM|9;FBgn0030514|CG9941|UPSTREAM|260],TranscriptAnnot[UPSTREAM(MODIFIER||9||1425|mus101|protein_coding|CODING|FBtr0073817||1);UPSTREAM(MODIFIER||260||789|CG9941|protein_coding|CODING|FBtr0073843||1);INTERGENIC(MODIFIER||||||||||1)]	Body Weight	-0.11104	0.501	0.00838258
Body Weight	2-stearoyl-GPE (18:0)*	41220	-0.40131	0.0103	XLOC_027415	U:8561290-8680119	0.5168	0.0008	X_14787700_SNP	0.1351	8.23224e-06	0.0009061	0.00108696	SiteClass[FBgn0264078|Flo2|INTRON|0;FBgn0030592|CG9514|INTRON|0],TranscriptAnnot[INTRON(MODIFIER||||438|Flo2|protein_coding|CODING|FBtr0073949|2|1);INTRON(MODIFIER||||425|Flo2|protein_coding|CODING|FBtr0073950|2|1);INTRON(MODIFIER||||438|Flo2|protein_coding|CODING|FBtr0073951|2|1);INTRON(MODIFIER||||425|Flo2|protein_coding|CODING|FBtr0073952|2|1);INTRON(MODIFIER||||435|Flo2|protein_coding|CODING|…	Body Weight	-0.02095	0.8993	0.0417685
Body Weight	1-palmitoyl-2-linoleoyl-GPI (16:0/18:2)	52450	-0.33283	0.0359	FBgn0085419	2R:14427090-14436474	-0.47328	0.0023	X_15050736_SNP	0.1026	2.40055e-06	0.000299	0.000617284	SiteClass[FBgn0030617|CG9095|INTRON|0],TranscriptAnnot[INTRON(MODIFIER||||955|CG9095|protein_coding|CODING|FBtr0074026|1|1);INTRON(MODIFIER||||1141|CG9095|protein_coding|CODING|FBtr0112984|1|1);INTRON(MODIFIER||||968|CG9095|protein_coding|CODING|FBtr0330402|1|1);INTRON(MODIFIER||||961|CG9095|protein_coding|CODING|FBtr0340410|1|1)]	Body Weight	-0.033	0.8419	0.0761682
Body Weight	1-palmitoyl-2-linoleoyl-GPI (16:0/18:2)	52450	-0.33283	0.0359	FBgn0085419	2R:14427090-14436474	-0.47328	0.0023	X_15052279_SNP	0.1282	2.6324e-06	0.0005139	0.000617284	SiteClass[FBgn0030617|CG9095|INTRON|0],TranscriptAnnot[INTRON(MODIFIER||||955|CG9095|protein_coding|CODING|FBtr0074026|1|1);INTRON(MODIFIER||||1141|CG9095|protein_coding|CODING|FBtr0112984|1|1);INTRON(MODIFIER||||968|CG9095|protein_coding|CODING|FBtr0330402|1|1);INTRON(MODIFIER||||961|CG9095|protein_coding|CODING|FBtr0340410|1|1)]	Body Weight	-0.033	0.8419	0.147551
Body Weight	1-stearoyl-GPE (18:0)	42398	-0.38049	0.0154	FBgn0028579	2R:2629404-2633646	0.45607	0.0035	X_16536397_SNP	0.125	3.86784e-06	0.0008198	0.000943396	SiteClass[FBgn0030766|mthl1|SYNONYMOUS_CODING|0],TranscriptAnnot[SYNONYMOUS_CODING(LOW|SILENT|atA/atT|I296|676|mthl1|protein_coding|CODING|FBtr0340150|1|1);SYNONYMOUS_CODING(LOW|SILENT|atA/atT|I296|676|mthl1|protein_coding|CODING|FBtr0074314|1|1)]	Body Weight	0.1161	0.4815	0.1609
Body Weight	1-stearoyl-GPE (18:0)	42398	-0.38049	0.0154	FBgn0051547	3R:1315227-1328424	0.483	0.0018	X_16536397_SNP	0.125	3.86784e-06	7.341e-05	0.000943396	SiteClass[FBgn0030766|mthl1|SYNONYMOUS_CODING|0],TranscriptAnnot[SYNONYMOUS_CODING(LOW|SILENT|atA/atT|I296|676|mthl1|protein_coding|CODING|FBtr0340150|1|1);SYNONYMOUS_CODING(LOW|SILENT|atA/atT|I296|676|mthl1|protein_coding|CODING|FBtr0074314|1|1)]	Body Weight	-0.18766	0.2526	0.1609
Body Weight	2-stearoyl-GPE (18:0)*	41220	-0.40131	0.0103	XLOC_028011	Uextra:3177610-3178493	0.53644	0.0004	X_16536397_SNP	0.125	7.71331e-06	0.0001629	0.00108696	SiteClass[FBgn0030766|mthl1|SYNONYMOUS_CODING|0],TranscriptAnnot[SYNONYMOUS_CODING(LOW|SILENT|atA/atT|I296|676|mthl1|protein_coding|CODING|FBtr0340150|1|1);SYNONYMOUS_CODING(LOW|SILENT|atA/atT|I296|676|mthl1|protein_coding|CODING|FBtr0074314|1|1)]	Body Weight	-0.03614	0.8271	0.1609
Body Weight	2-stearoyl-GPE (18:0)*	41220	-0.40131	0.0103	XLOC_028011	Uextra:3177610-3178493	0.53644	0.0004	X_16748411_SNP	0.1944	9.56362e-07	0.0003924	0.00108696	SiteClass[FBgn0030798|CG13003|INTRON|0],TranscriptAnnot[INTRON(MODIFIER||||1158|CG13003|protein_coding|CODING|FBtr0300431|3|1);INTRON(MODIFIER||||1158|CG13003|protein_coding|CODING|FBtr0331739|3|1)]	Body Weight	-0.03614	0.8271	0.0643123
Body Weight	1-palmitoyl-GPG (16:0)*	45970	-0.36529	0.0205	XLOC_028011	Uextra:3177610-3178493	0.5336	0.0005	X_16748411_SNP	0.1944	2.57233e-06	0.0003924	0.00166667	SiteClass[FBgn0030798|CG13003|INTRON|0],TranscriptAnnot[INTRON(MODIFIER||||1158|CG13003|protein_coding|CODING|FBtr0300431|3|1);INTRON(MODIFIER||||1158|CG13003|protein_coding|CODING|FBtr0331739|3|1)]	Body Weight	-0.03614	0.8271	0.0643123
Body Weight	1-palmitoyl-GPG (16:0)*	45970	-0.36529	0.0205	FBgn0261563	2L:14263027-14328262	-0.54777	0.0003	X_16748411_SNP	0.1944	2.57233e-06	0.0006434	0.00166667	SiteClass[FBgn0030798|CG13003|INTRON|0],TranscriptAnnot[INTRON(MODIFIER||||1158|CG13003|protein_coding|CODING|FBtr0300431|3|1);INTRON(MODIFIER||||1158|CG13003|protein_coding|CODING|FBtr0331739|3|1)]	Body Weight	0.17126	0.2972	0.0643123
Body Weight	2-stearoyl-GPE (18:0)*	41220	-0.40131	0.0103	FBgn0261563	2L:14263027-14328262	-0.47753	0.0021	X_16748411_SNP	0.1944	9.56362e-07	0.0006434	0.00108696	SiteClass[FBgn0030798|CG13003|INTRON|0],TranscriptAnnot[INTRON(MODIFIER||||1158|CG13003|protein_coding|CODING|FBtr0300431|3|1);INTRON(MODIFIER||||1158|CG13003|protein_coding|CODING|FBtr0331739|3|1)]	Body Weight	0.17126	0.2972	0.0643123
Body Weight	N-acetyl-glucosamine 1-phosphate	15741	-0.36154	0.0219	FBgn0039312	3R:21104149-21105568	-0.56761	0.0002	X_17007310_SNP	0.1026	6.10668e-06	0.0003598	0.00138889	SiteClass[FBgn0260748|CG5004|INTRON|0],TranscriptAnnot[INTRON(MODIFIER||||1247|CG5004|protein_coding|CODING|FBtr0074386|1|1)]	Body Weight	-0.16985	0.3013	0.263679
Body Weight	N-acetyl-glucosamine 1-phosphate	15741	-0.36154	0.0219	FBgn0031694	2L:5266392-5268455	-0.4664	0.0028	X_17007310_SNP	0.1026	6.10668e-06	0.0004352	0.00138889	SiteClass[FBgn0260748|CG5004|INTRON|0],TranscriptAnnot[INTRON(MODIFIER||||1247|CG5004|protein_coding|CODING|FBtr0074386|1|1)]	Body Weight	-0.05942	0.7194	0.263679
Body Weight	N-acetyl-glucosamine 1-phosphate	15741	-0.36154	0.0219	XLOC_031907	X:12771234-12775701	0.46518	0.0028	X_17007310_SNP	0.1026	6.10668e-06	0.001297	0.00138889	SiteClass[FBgn0260748|CG5004|INTRON|0],TranscriptAnnot[INTRON(MODIFIER||||1247|CG5004|protein_coding|CODING|FBtr0074386|1|1)]	Body Weight	-0.25437	0.1181	0.263679
Body Weight	N-acetyl-glucosamine 1-phosphate	15741	-0.36154	0.0219	FBgn0267035	X:2067513-2069888	-0.45283	0.0038	X_19912808_SNP	0.1316	8.10224e-06	0.0003143	0.00138889	SiteClass[FBgn0053517|Dop2R|INTRON|0],TranscriptAnnot[INTRON(MODIFIER||||760|Dop2R|protein_coding|CODING|FBtr0343167|4|1);INTRON(MODIFIER||||897|Dop2R|protein_coding|CODING|FBtr0343168|3|1);INTRON(MODIFIER||||905|Dop2R|protein_coding|CODING|FBtr0343169|4|1);INTRON(MODIFIER||||904|Dop2R|protein_coding|CODING|FBtr0343170|4|1);INTRON(MODIFIER||||805|Dop2R|protein_coding|CODING|FBtr0343171|4|1)]	Body Weight	-0.03016	0.8554	0.21665
Body Weight	N-acetyl-glucosamine 1-phosphate	15741	-0.36154	0.0219	FBgn0016919	2L:21578292-21589423	-0.47834	0.0021	X_19912808_SNP	0.1316	8.10224e-06	0.0009484	0.00138889	SiteClass[FBgn0053517|Dop2R|INTRON|0],TranscriptAnnot[INTRON(MODIFIER||||760|Dop2R|protein_coding|CODING|FBtr0343167|4|1);INTRON(MODIFIER||||897|Dop2R|protein_coding|CODING|FBtr0343168|3|1);INTRON(MODIFIER||||905|Dop2R|protein_coding|CODING|FBtr0343169|4|1);INTRON(MODIFIER||||904|Dop2R|protein_coding|CODING|FBtr0343170|4|1);INTRON(MODIFIER||||805|Dop2R|protein_coding|CODING|FBtr0343171|4|1)]	Body Weight	-0.13482	0.4132	0.21665
Body Weight	N-acetyl-glucosamine 1-phosphate	15741	-0.36154	0.0219	FBgn0039312	3R:21104149-21105568	-0.56761	0.0002	X_19912808_SNP	0.1316	8.10224e-06	0.0002368	0.00138889	SiteClass[FBgn0053517|Dop2R|INTRON|0],TranscriptAnnot[INTRON(MODIFIER||||760|Dop2R|protein_coding|CODING|FBtr0343167|4|1);INTRON(MODIFIER||||897|Dop2R|protein_coding|CODING|FBtr0343168|3|1);INTRON(MODIFIER||||905|Dop2R|protein_coding|CODING|FBtr0343169|4|1);INTRON(MODIFIER||||904|Dop2R|protein_coding|CODING|FBtr0343170|4|1);INTRON(MODIFIER||||805|Dop2R|protein_coding|CODING|FBtr0343171|4|1)]	Body Weight	-0.16985	0.3013	0.21665
Body Weight	N-acetyl-glucosamine 1-phosphate	15741	-0.36154	0.0219	FBgn0020766	2R:9855813-9857407	-0.46134	0.0031	X_19912808_SNP	0.1316	8.10224e-06	0.000711	0.00138889	SiteClass[FBgn0053517|Dop2R|INTRON|0],TranscriptAnnot[INTRON(MODIFIER||||760|Dop2R|protein_coding|CODING|FBtr0343167|4|1);INTRON(MODIFIER||||897|Dop2R|protein_coding|CODING|FBtr0343168|3|1);INTRON(MODIFIER||||905|Dop2R|protein_coding|CODING|FBtr0343169|4|1);INTRON(MODIFIER||||904|Dop2R|protein_coding|CODING|FBtr0343170|4|1);INTRON(MODIFIER||||805|Dop2R|protein_coding|CODING|FBtr0343171|4|1)]	Body Weight	0.14444	0.3803	0.21665
Body Weight	N-acetyl-glucosamine 1-phosphate	15741	-0.36154	0.0219	FBgn0031694	2L:5266392-5268455	-0.4664	0.0028	X_19912808_SNP	0.1316	8.10224e-06	0.001269	0.00138889	SiteClass[FBgn0053517|Dop2R|INTRON|0],TranscriptAnnot[INTRON(MODIFIER||||760|Dop2R|protein_coding|CODING|FBtr0343167|4|1);INTRON(MODIFIER||||897|Dop2R|protein_coding|CODING|FBtr0343168|3|1);INTRON(MODIFIER||||905|Dop2R|protein_coding|CODING|FBtr0343169|4|1);INTRON(MODIFIER||||904|Dop2R|protein_coding|CODING|FBtr0343170|4|1);INTRON(MODIFIER||||805|Dop2R|protein_coding|CODING|FBtr0343171|4|1)]	Body Weight	-0.05942	0.7194	0.21665
Body Weight	gamma-glutamylisoleucine*	34456	-0.34508	0.0292	FBgn0033756	2R:8513313-8516124	-0.46626	0.0028	X_2552455_SNP	0.1538	8.06557e-06	0.0004847	0.000833333	SiteClass[FBgn0003371|sgg|INTRON|0],TranscriptAnnot[UPSTREAM(MODIFIER||344||1067|sgg|protein_coding|CODING|FBtr0070471||1);UPSTREAM(MODIFIER||344||1126|sgg|protein_coding|CODING|FBtr0331751||1);INTRON(MODIFIER||||514|sgg|protein_coding|CODING|FBtr0070466|2|1);INTRON(MODIFIER||||575|sgg|protein_coding|CODING|FBtr0070467|2|1);INTRON(MODIFIER||||514|sgg|protein_coding|CODING|FBtr0070468|2|1);INTRON(…	Body Weight	0.20001	0.2222	0.928524
Body Weight	gamma-glutamylisoleucine*	34456	-0.34508	0.0292	FBgn0033756	2R:8513313-8516124	-0.46626	0.0028	X_2552456_SNP	0.15	7.33435e-06	0.0005412	0.000833333	SiteClass[FBgn0003371|sgg|INTRON|0],TranscriptAnnot[UPSTREAM(MODIFIER||343||1067|sgg|protein_coding|CODING|FBtr0070471||1);UPSTREAM(MODIFIER||343||1126|sgg|protein_coding|CODING|FBtr0331751||1);INTRON(MODIFIER||||514|sgg|protein_coding|CODING|FBtr0070466|2|1);INTRON(MODIFIER||||575|sgg|protein_coding|CODING|FBtr0070467|2|1);INTRON(MODIFIER||||514|sgg|protein_coding|CODING|FBtr0070468|2|1);INTRON(…	Body Weight	0.20001	0.2222	0.941837
Body Weight	gamma-glutamylisoleucine*	34456	-0.34508	0.0292	FBgn0033756	2R:8513313-8516124	-0.46626	0.0028	X_2553679_SNP	0.1053	8.92419e-06	3.352e-05	0.000833333	SiteClass[FBgn0003371|sgg|INTRON|0],TranscriptAnnot[SYNONYMOUS_CODING(LOW|SILENT|agT/agC|S99|1067|sgg|protein_coding|CODING|FBtr0070471|1|1);SYNONYMOUS_CODING(LOW|SILENT|agT/agC|S99|1126|sgg|protein_coding|CODING|FBtr0331751|2|1);SYNONYMOUS_CODING(LOW|SILENT|agT/agC|S99|1168|sgg|protein_coding|CODING|FBtr0331752|2|1);INTRON(MODIFIER||||514|sgg|protein_coding|CODING|FBtr0070466|2|1);INTRON(MODIFIE…	Body Weight	0.20001	0.2222	0.428299
Body Weight	gamma-glutamylisoleucine*	34456	-0.34508	0.0292	FBgn0033756	2R:8513313-8516124	-0.46626	0.0028	X_2559690_SNP	0.1026	9.69254e-06	1.975e-05	0.000833333	SiteClass[FBgn0003371|sgg|INTRON|0],TranscriptAnnot[INTRON(MODIFIER||||514|sgg|protein_coding|CODING|FBtr0070466|2|1);INTRON(MODIFIER||||575|sgg|protein_coding|CODING|FBtr0070467|2|1);INTRON(MODIFIER||||514|sgg|protein_coding|CODING|FBtr0070468|2|1);INTRON(MODIFIER||||514|sgg|protein_coding|CODING|FBtr0070469|2|1);INTRON(MODIFIER||||514|sgg|protein_coding|CODING|FBtr0070470|2|1);INTRON(MODIFIER||…	Body Weight	0.20001	0.2222	0.395638
Body Weight	1,2-dipalmitoyl-GPC (16:0/16:0)	19130	-0.33133	0.0368	FBgn0002719	3R:8538825-8548164	0.48543	0.0017	X_3400559_SNP	0.1667	6.99119e-07	0.002625	0.00357143	SiteClass[FBgn0266350|CR44999|INTRON|0;FBgn0052791|CG32791|DOWNSTREAM|719],TranscriptAnnot[DOWNSTREAM(MODIFIER||719||554|CG32791|protein_coding|CODING|FBtr0333795||1);INTRON(MODIFIER|||||CR44999|ncRNA|NON_CODING|FBtr0344076|3|1)]	Body Weight	-0.11104	0.501	0.103402
Body Weight	histamine	1574	-0.38248	0.0149	FBgn0031150	X:20924990-20953418	-0.50013	0.0012	X_4563298_SNP	0.4	5.57416e-06	0.001325	0.00172414	SiteClass[FBgn0262699|rap|INTRON|0],TranscriptAnnot[INTRON(MODIFIER||||478|rap|protein_coding|CODING|FBtr0070686|3|1);INTRON(MODIFIER||||478|rap|protein_coding|CODING|FBtr0070687|3|1)]	Body Weight	0.14717	0.3713	0.0959375
Body Weight	histamine	1574	-0.38248	0.0149	XLOC_006312	2R:437737-438549	0.49689	0.0013	X_4563298_SNP	0.4	5.57416e-06	0.0001975	0.00172414	SiteClass[FBgn0262699|rap|INTRON|0],TranscriptAnnot[INTRON(MODIFIER||||478|rap|protein_coding|CODING|FBtr0070686|3|1);INTRON(MODIFIER||||478|rap|protein_coding|CODING|FBtr0070687|3|1)]	Body Weight	-0.33818	0.0352	0.0959375
Body Weight	histamine	1574	-0.38248	0.0149	FBgn0040259	3R:6982820-6985466	-0.46591	0.0028	X_4563298_SNP	0.4	5.57416e-06	0.001193	0.00172414	SiteClass[FBgn0262699|rap|INTRON|0],TranscriptAnnot[INTRON(MODIFIER||||478|rap|protein_coding|CODING|FBtr0070686|3|1);INTRON(MODIFIER||||478|rap|protein_coding|CODING|FBtr0070687|3|1)]	Body Weight	0.28534	0.0783	0.0959375
Body Weight	histamine	1574	-0.38248	0.0149	FBgn0038680	3R:14958370-14960426	-0.48596	0.0017	X_4563298_SNP	0.4	5.57416e-06	0.001169	0.00172414	SiteClass[FBgn0262699|rap|INTRON|0],TranscriptAnnot[INTRON(MODIFIER||||478|rap|protein_coding|CODING|FBtr0070686|3|1);INTRON(MODIFIER||||478|rap|protein_coding|CODING|FBtr0070687|3|1)]	Body Weight	-0.07247	0.6611	0.0959375
Body Weight	gamma-glutamylglutamine	2730	-0.33884	0.0325	FBgn0036787	3L:18455057-18456263	-0.7166	<.0001	X_4705395_SNP	0.1282	6.04407e-08	0.0004432	0.00357143	SiteClass[|||],TranscriptAnnot[INTERGENIC(MODIFIER||||||||||1)]	Body Weight	0.1909	0.2444	0.28484
Body Weight	gamma-glutamylglutamine	2730	-0.33884	0.0325	FBgn0035313	3L:2185930-2187676	-0.45789	0.0034	X_4705395_SNP	0.1282	6.04407e-08	0.0001111	0.00357143	SiteClass[|||],TranscriptAnnot[INTERGENIC(MODIFIER||||||||||1)]	Body Weight	0.12055	0.4648	0.28484
Body Weight	gamma-glutamylglutamine	2730	-0.33884	0.0325	XLOC_006253	2LHet:25786-29448	-0.46862	0.0026	X_4705395_SNP	0.1282	6.04407e-08	0.001463	0.00357143	SiteClass[|||],TranscriptAnnot[INTERGENIC(MODIFIER||||||||||1)]	Body Weight	0.21944	0.1795	0.28484
Body Weight	1-palmitoyl-2-linoleoyl-GPI (16:0/18:2)	52450	-0.33283	0.0359	FBgn0030607	X:14961040-14963124	0.50688	0.001	X_5324021_SNP	0.125	5.88837e-06	0.0003922	0.000617284	SiteClass[FBgn0029766|CG15784|UPSTREAM|577;FBgn0267073|CR45517|DOWNSTREAM|732],TranscriptAnnot[UTR_5_PRIME(MODIFIER||692||554|CG15784|protein_coding|CODING|FBtr0340460|1|1);UPSTREAM(MODIFIER||577||554|CG15784|protein_coding|CODING|FBtr0070777||1);DOWNSTREAM(MODIFIER||732|||CR45517|ncRNA|NON_CODING|FBtr0346054||1)]	Body Weight	-0.20588	0.2086	0.0732336
Body Weight	histamine	1574	-0.38248	0.0149	XLOC_011951	2RHet:1308120-1309834	0.52179	0.0007	X_6110430_SNP	0.2162	4.56644e-06	0.0001992	0.00172414	SiteClass[FBgn0029848|Btd|DOWNSTREAM|871],TranscriptAnnot[DOWNSTREAM(MODIFIER||871||553|Btd|protein_coding|CODING|FBtr0070878||1);INTERGENIC(MODIFIER||||||||||1)]	Body Weight	-0.16084	0.328	0.0215587
Body Weight	histamine	1574	-0.38248	0.0149	XLOC_011947	2RHet:1285029-1285725	0.49496	0.0014	X_6110430_SNP	0.2162	4.56644e-06	0.00171	0.00172414	SiteClass[FBgn0029848|Btd|DOWNSTREAM|871],TranscriptAnnot[DOWNSTREAM(MODIFIER||871||553|Btd|protein_coding|CODING|FBtr0070878||1);INTERGENIC(MODIFIER||||||||||1)]	Body Weight	-0.28837	0.075	0.0215587
Body Weight	histamine	1574	-0.38248	0.0149	XLOC_011947	2RHet:1285029-1285725	0.49496	0.0014	X_6110480_SNP	0.2308	6.02784e-06	0.00106	0.00172414	SiteClass[FBgn0029848|Btd|DOWNSTREAM|821],TranscriptAnnot[DOWNSTREAM(MODIFIER||821||553|Btd|protein_coding|CODING|FBtr0070878||1);INTERGENIC(MODIFIER||||||||||1)]	Body Weight	-0.28837	0.075	0.0163611
Body Weight	histamine	1574	-0.38248	0.0149	XLOC_011951	2RHet:1308120-1309834	0.52179	0.0007	X_6110480_SNP	0.2308	6.02784e-06	3.996e-05	0.00172414	SiteClass[FBgn0029848|Btd|DOWNSTREAM|821],TranscriptAnnot[DOWNSTREAM(MODIFIER||821||553|Btd|protein_coding|CODING|FBtr0070878||1);INTERGENIC(MODIFIER||||||||||1)]	Body Weight	-0.16084	0.328	0.0163611
Body Weight	1-palmitoyl-2-linoleoyl-GPI (16:0/18:2)	52450	-0.33283	0.0359	FBgn0085419	2R:14427090-14436474	-0.47328	0.0023	X_6331078_SNP	0.1282	9.0984e-08	0.0001169	0.000617284	SiteClass[FBgn0259242|CG42340|INTRON|0],TranscriptAnnot[INTRON(MODIFIER||||484|CG42340|protein_coding|CODING|FBtr0332386|8|1)]	Body Weight	-0.033	0.8419	0.160909
Body Weight	2-stearoyl-GPE (18:0)*	41220	-0.40131	0.0103	FBgn0001224	3L:9374982-9375865	0.48077	0.0019	X_6914612_SNP	0.3077	7.1449e-06	0.0009125	0.00108696	SiteClass[|||],TranscriptAnnot[INTERGENIC(MODIFIER||||||||||1)]	Body Weight	-0.18796	0.2518	0.480959
Body Weight	2-stearoyl-GPE (18:0)*	41220	-0.40131	0.0103	FBgn0261563	2L:14263027-14328262	-0.47753	0.0021	X_6914612_SNP	0.3077	7.1449e-06	0.0005082	0.00108696	SiteClass[|||],TranscriptAnnot[INTERGENIC(MODIFIER||||||||||1)]	Body Weight	0.17126	0.2972	0.480959
Body Weight	2-stearoyl-GPE (18:0)*	41220	-0.40131	0.0103	FBgn0031184	X:21849019-21851327	-0.49069	0.0015	X_6914612_SNP	0.3077	7.1449e-06	0.0008038	0.00108696	SiteClass[|||],TranscriptAnnot[INTERGENIC(MODIFIER||||||||||1)]	Body Weight	-0.05243	0.7512	0.480959
Body Weight	1-palmitoyl-GPG (16:0)*	45970	-0.36529	0.0205	FBgn0036727	3L:17463227-17467617	-0.57713	0.0001	X_6914612_SNP	0.3077	2.42144e-06	0.0005608	0.00166667	SiteClass[|||],TranscriptAnnot[INTERGENIC(MODIFIER||||||||||1)]	Body Weight	-0.07814	0.6363	0.480959
Body Weight	2-stearoyl-GPE (18:0)*	41220	-0.40131	0.0103	FBgn0028372	2R:15558123-15560982	0.47611	0.0022	X_6914612_SNP	0.3077	7.1449e-06	4.111e-05	0.00108696	SiteClass[|||],TranscriptAnnot[INTERGENIC(MODIFIER||||||||||1)]	Body Weight	0.11367	0.4908	0.480959
Body Weight	1-palmitoyl-GPG (16:0)*	45970	-0.36529	0.0205	FBgn0261563	2L:14263027-14328262	-0.54777	0.0003	X_6914612_SNP	0.3077	2.42144e-06	0.0005082	0.00166667	SiteClass[|||],TranscriptAnnot[INTERGENIC(MODIFIER||||||||||1)]	Body Weight	0.17126	0.2972	0.480959
Body Weight	2-stearoyl-GPE (18:0)*	41220	-0.40131	0.0103	FBgn0036727	3L:17463227-17467617	-0.58968	<.0001	X_6914612_SNP	0.3077	7.1449e-06	0.0005608	0.00108696	SiteClass[|||],TranscriptAnnot[INTERGENIC(MODIFIER||||||||||1)]	Body Weight	-0.07814	0.6363	0.480959
Body Weight	histamine	1574	-0.38248	0.0149	FBgn0031150	X:20924990-20953418	-0.50013	0.0012	X_7416276_SNP	0.2368	5.99666e-06	0.000735	0.00172414	SiteClass[FBgn0052719|CG32719|INTRON|0],TranscriptAnnot[INTRON(MODIFIER||||1220|CG32719|protein_coding|CODING|FBtr0071083|2|1)]	Body Weight	0.14717	0.3713	0.233976
Body Weight	gamma-glutamylisoleucine*	34456	-0.34508	0.0292	FBgn0033756	2R:8513313-8516124	-0.46626	0.0028	X_8834500_SNP	0.1081	6.04591e-06	4.788e-05	0.000833333	SiteClass[FBgn0261549|rdgA|INTRON|0],TranscriptAnnot[INTRON(MODIFIER||||1024|rdgA|protein_coding|CODING|FBtr0302662|3|1);INTRON(MODIFIER||||1027|rdgA|protein_coding|CODING|FBtr0302661|2|1);INTRON(MODIFIER||||1009|rdgA|protein_coding|CODING|FBtr0302663|3|1);INTRON(MODIFIER||||991|rdgA|protein_coding|CODING|FBtr0302664|3|1);INTRON(MODIFIER||||1457|rdgA|protein_coding|CODING|FBtr0302660|1|1);INTRON(…	Body Weight	0.20001	0.2222	0.496837
Body Weight	gamma-glutamylglutamine	2730	-0.33884	0.0325	FBgn0036787	3L:18455057-18456263	-0.7166	<.0001	X_9415993_SNP	0.1026	6.39983e-08	0.0002521	0.00357143	SiteClass[FBgn0267253|CG32700|INTRON|0],TranscriptAnnot[INTRON(MODIFIER||||218|CG32700|protein_coding|CODING|FBtr0071374|1|1);INTRON(MODIFIER||||218|CG32700|protein_coding|CODING|FBtr0071373|1|1)]	Body Weight	0.1909	0.2444	0.211653
Body Weight	gamma-glutamylglutamine	2730	-0.33884	0.0325	FBgn0001978	2L:15113480-15118069	0.49514	0.0014	X_9415993_SNP	0.1026	6.39983e-08	0.0003153	0.00357143	SiteClass[FBgn0267253|CG32700|INTRON|0],TranscriptAnnot[INTRON(MODIFIER||||218|CG32700|protein_coding|CODING|FBtr0071374|1|1);INTRON(MODIFIER||||218|CG32700|protein_coding|CODING|FBtr0071373|1|1)]	Body Weight	-0.03978	0.81	0.211653
Body Weight	gamma-glutamylglutamine	2730	-0.33884	0.0325	FBgn0035313	3L:2185930-2187676	-0.45789	0.0034	X_9415993_SNP	0.1026	6.39983e-08	0.0002531	0.00357143	SiteClass[FBgn0267253|CG32700|INTRON|0],TranscriptAnnot[INTRON(MODIFIER||||218|CG32700|protein_coding|CODING|FBtr0071374|1|1);INTRON(MODIFIER||||218|CG32700|protein_coding|CODING|FBtr0071373|1|1)]	Body Weight	0.12055	0.4648	0.211653
Body Weight	2-stearoyl-GPE (18:0)*	41220	-0.40131	0.0103	FBgn0263258	X:17566491-17592763	-0.45142	0.0039	X_9523211_SNP	0.1081	1.09254e-06	0.0001833	0.00108696	SiteClass[FBgn0028341|l_1_G0232|SYNONYMOUS_CODING|0],TranscriptAnnot[SYNONYMOUS_CODING(LOW|SILENT|taC/taT|Y475|498|l_1_G0232|protein_coding|CODING|FBtr0071407|7|1);SYNONYMOUS_CODING(LOW|SILENT|taC/taT|Y574|597|l_1_G0232|protein_coding|CODING|FBtr0100193|9|1);SYNONYMOUS_CODING(LOW|SILENT|taC/taT|Y767|790|l_1_G0232|protein_coding|CODING|FBtr0303558|8|1);SYNONYMOUS_CODING(LOW|SILENT|taC/taT|Y774|797…	Body Weight	-0.04282	0.7958	0.062934
Body Weight	2-stearoyl-GPE (18:0)*	41220	-0.40131	0.0103	XLOC_027415	U:8561290-8680119	0.5168	0.0008	X_9523211_SNP	0.1081	1.09254e-06	8.787e-06	0.00108696	SiteClass[FBgn0028341|l_1_G0232|SYNONYMOUS_CODING|0],TranscriptAnnot[SYNONYMOUS_CODING(LOW|SILENT|taC/taT|Y475|498|l_1_G0232|protein_coding|CODING|FBtr0071407|7|1);SYNONYMOUS_CODING(LOW|SILENT|taC/taT|Y574|597|l_1_G0232|protein_coding|CODING|FBtr0100193|9|1);SYNONYMOUS_CODING(LOW|SILENT|taC/taT|Y767|790|l_1_G0232|protein_coding|CODING|FBtr0303558|8|1);SYNONYMOUS_CODING(LOW|SILENT|taC/taT|Y774|797…	Body Weight	-0.02095	0.8993	0.062934
Body Weight	2-stearoyl-GPE (18:0)*	41220	-0.40131	0.0103	FBgn0031184	X:21849019-21851327	-0.49069	0.0015	X_9619229_SNP	0.1538	1.28367e-06	0.0009849	0.00108696	SiteClass[|||],TranscriptAnnot[INTERGENIC(MODIFIER||||||||||1)]	Body Weight	-0.05243	0.7512	0.204721
Body Weight	2-stearoyl-GPE (18:0)*	41220	-0.40131	0.0103	FBgn0261563	2L:14263027-14328262	-0.47753	0.0021	X_9619229_SNP	0.1538	1.28367e-06	0.0002989	0.00108696	SiteClass[|||],TranscriptAnnot[INTERGENIC(MODIFIER||||||||||1)]	Body Weight	0.17126	0.2972	0.204721
Body Weight	2-stearoyl-GPE (18:0)*	41220	-0.40131	0.0103	XLOC_027415	U:8561290-8680119	0.5168	0.0008	X_9619229_SNP	0.1538	1.28367e-06	0.0009351	0.00108696	SiteClass[|||],TranscriptAnnot[INTERGENIC(MODIFIER||||||||||1)]	Body Weight	-0.02095	0.8993	0.204721
Free Glucose	panose	37284	0.39606	0.0114	XLOC_027796	U:8483039-8483603	-0.62126	<.0001	2L_10774505_SNP	0.275	6.56625e-06	0.001335	0.00138889	SiteClass[FBgn0051869|CG31869|SYNONYMOUS_CODING|0],TranscriptAnnot[SYNONYMOUS_CODING(LOW|SILENT|aaA/aaG|K288|777|CG31869|protein_coding|CODING|FBtr0080189|7|1);SYNONYMOUS_CODING(LOW|SILENT|aaA/aaG|K288|777|CG31869|protein_coding|CODING|FBtr0290246|8|1);SYNONYMOUS_CODING(LOW|SILENT|aaA/aaG|K113|602|CG31869|protein_coding|CODING|FBtr0290245|7|1)]	Free Glucose	-0.23926	0.1424	0.052377
Free Glucose	panose	37284	0.39606	0.0114	FBgn0083972	2L:21096922-21098932	0.51883	0.0007	2L_10774505_SNP	0.275	6.56625e-06	0.0002021	0.00138889	SiteClass[FBgn0051869|CG31869|SYNONYMOUS_CODING|0],TranscriptAnnot[SYNONYMOUS_CODING(LOW|SILENT|aaA/aaG|K288|777|CG31869|protein_coding|CODING|FBtr0080189|7|1);SYNONYMOUS_CODING(LOW|SILENT|aaA/aaG|K288|777|CG31869|protein_coding|CODING|FBtr0290246|8|1);SYNONYMOUS_CODING(LOW|SILENT|aaA/aaG|K113|602|CG31869|protein_coding|CODING|FBtr0290245|7|1)]	Free Glucose	0.41154	0.0092	0.052377
Free Glucose	panose	37284	0.39606	0.0114	XLOC_025652	3R:21541227-21544104	-0.47854	0.0021	2L_10774505_SNP	0.275	6.56625e-06	0.0006366	0.00138889	SiteClass[FBgn0051869|CG31869|SYNONYMOUS_CODING|0],TranscriptAnnot[SYNONYMOUS_CODING(LOW|SILENT|aaA/aaG|K288|777|CG31869|protein_coding|CODING|FBtr0080189|7|1);SYNONYMOUS_CODING(LOW|SILENT|aaA/aaG|K288|777|CG31869|protein_coding|CODING|FBtr0290246|8|1);SYNONYMOUS_CODING(LOW|SILENT|aaA/aaG|K113|602|CG31869|protein_coding|CODING|FBtr0290245|7|1)]	Free Glucose	-0.40547	0.0104	0.052377
Free Glucose	panose	37284	0.39606	0.0114	FBgn0004587	3R:9487033-9492613	0.48826	0.0016	2L_10774505_SNP	0.275	6.56625e-06	0.0007875	0.00138889	SiteClass[FBgn0051869|CG31869|SYNONYMOUS_CODING|0],TranscriptAnnot[SYNONYMOUS_CODING(LOW|SILENT|aaA/aaG|K288|777|CG31869|protein_coding|CODING|FBtr0080189|7|1);SYNONYMOUS_CODING(LOW|SILENT|aaA/aaG|K288|777|CG31869|protein_coding|CODING|FBtr0290246|8|1);SYNONYMOUS_CODING(LOW|SILENT|aaA/aaG|K113|602|CG31869|protein_coding|CODING|FBtr0290245|7|1)]	Free Glucose	0.12874	0.4347	0.052377
Free Glucose	histamine	1574	-0.36831	0.0194	FBgn0038654	3R:14701250-14702926	0.49284	0.0014	2L_10819377_SNP	0.2051	1.69528e-06	0.0007479	0.00172414	SiteClass[FBgn0032303|CG6508|SYNONYMOUS_CODING|0;FBgn0011676|Nos|INTRON|0],TranscriptAnnot[SYNONYMOUS_CODING(LOW|SILENT|caG/caA|Q85|423|CG6508|protein_coding|CODING|FBtr0080139|1|1);INTRON(MODIFIER||||1349|Nos|protein_coding|CODING|FBtr0080188|8|1);INTRON(MODIFIER||||756|Nos|protein_coding|CODING|FBtr0100489|8|1);INTRON(MODIFIER||||1098|Nos|protein_coding|CODING|FBtr0343888|6|1)]	Free Glucose	-0.20587	0.2086	0.101301
Free Glucose	histamine	1574	-0.36831	0.0194	FBgn0036266	3L:12197223-12199122	-0.45377	0.0037	2L_10819377_SNP	0.2051	1.69528e-06	0.0001114	0.00172414	SiteClass[FBgn0032303|CG6508|SYNONYMOUS_CODING|0;FBgn0011676|Nos|INTRON|0],TranscriptAnnot[SYNONYMOUS_CODING(LOW|SILENT|caG/caA|Q85|423|CG6508|protein_coding|CODING|FBtr0080139|1|1);INTRON(MODIFIER||||1349|Nos|protein_coding|CODING|FBtr0080188|8|1);INTRON(MODIFIER||||756|Nos|protein_coding|CODING|FBtr0100489|8|1);INTRON(MODIFIER||||1098|Nos|protein_coding|CODING|FBtr0343888|6|1)]	Free Glucose	0.11356	0.4912	0.101301
Free Glucose	histamine	1574	-0.36831	0.0194	FBgn0034725	2R:18291682-18296045	-0.45832	0.0033	2L_10819377_SNP	0.2051	1.69528e-06	2.941e-05	0.00172414	SiteClass[FBgn0032303|CG6508|SYNONYMOUS_CODING|0;FBgn0011676|Nos|INTRON|0],TranscriptAnnot[SYNONYMOUS_CODING(LOW|SILENT|caG/caA|Q85|423|CG6508|protein_coding|CODING|FBtr0080139|1|1);INTRON(MODIFIER||||1349|Nos|protein_coding|CODING|FBtr0080188|8|1);INTRON(MODIFIER||||756|Nos|protein_coding|CODING|FBtr0100489|8|1);INTRON(MODIFIER||||1098|Nos|protein_coding|CODING|FBtr0343888|6|1)]	Free Glucose	-0.21296	0.193	0.101301
Free Glucose	histamine	1574	-0.36831	0.0194	FBgn0085422	2L:3175112-3200496	0.54223	0.0004	2L_10819377_SNP	0.2051	1.69528e-06	0.000252	0.00172414	SiteClass[FBgn0032303|CG6508|SYNONYMOUS_CODING|0;FBgn0011676|Nos|INTRON|0],TranscriptAnnot[SYNONYMOUS_CODING(LOW|SILENT|caG/caA|Q85|423|CG6508|protein_coding|CODING|FBtr0080139|1|1);INTRON(MODIFIER||||1349|Nos|protein_coding|CODING|FBtr0080188|8|1);INTRON(MODIFIER||||756|Nos|protein_coding|CODING|FBtr0100489|8|1);INTRON(MODIFIER||||1098|Nos|protein_coding|CODING|FBtr0343888|6|1)]	Free Glucose	-0.25223	0.1214	0.101301
Free Glucose	histamine	1574	-0.36831	0.0194	FBgn0031150	X:20924990-20953418	-0.50013	0.0012	2L_10819377_SNP	0.2051	1.69528e-06	4.433e-05	0.00172414	SiteClass[FBgn0032303|CG6508|SYNONYMOUS_CODING|0;FBgn0011676|Nos|INTRON|0],TranscriptAnnot[SYNONYMOUS_CODING(LOW|SILENT|caG/caA|Q85|423|CG6508|protein_coding|CODING|FBtr0080139|1|1);INTRON(MODIFIER||||1349|Nos|protein_coding|CODING|FBtr0080188|8|1);INTRON(MODIFIER||||756|Nos|protein_coding|CODING|FBtr0100489|8|1);INTRON(MODIFIER||||1098|Nos|protein_coding|CODING|FBtr0343888|6|1)]	Free Glucose	0.17166	0.2961	0.101301
Free Glucose	histamine	1574	-0.36831	0.0194	FBgn0038654	3R:14701250-14702926	0.49284	0.0014	2L_10819429_SNP	0.2051	9.28648e-06	0.0007279	0.00172414	SiteClass[FBgn0032303|CG6508|NON_SYNONYMOUS_CODING|0;FBgn0011676|Nos|INTRON|0],TranscriptAnnot[NON_SYNONYMOUS_CODING(MODERATE|MISSENSE|Gta/Ata|V103I|423|CG6508|protein_coding|CODING|FBtr0080139|1|1);INTRON(MODIFIER||||1349|Nos|protein_coding|CODING|FBtr0080188|8|1);INTRON(MODIFIER||||756|Nos|protein_coding|CODING|FBtr0100489|8|1);INTRON(MODIFIER||||1098|Nos|protein_coding|CODING|FBtr0343888|6|1)]	Free Glucose	-0.20587	0.2086	0.131291
Free Glucose	histamine	1574	-0.36831	0.0194	FBgn0085422	2L:3175112-3200496	0.54223	0.0004	2L_10819429_SNP	0.2051	9.28648e-06	0.0009475	0.00172414	SiteClass[FBgn0032303|CG6508|NON_SYNONYMOUS_CODING|0;FBgn0011676|Nos|INTRON|0],TranscriptAnnot[NON_SYNONYMOUS_CODING(MODERATE|MISSENSE|Gta/Ata|V103I|423|CG6508|protein_coding|CODING|FBtr0080139|1|1);INTRON(MODIFIER||||1349|Nos|protein_coding|CODING|FBtr0080188|8|1);INTRON(MODIFIER||||756|Nos|protein_coding|CODING|FBtr0100489|8|1);INTRON(MODIFIER||||1098|Nos|protein_coding|CODING|FBtr0343888|6|1)]	Free Glucose	-0.25223	0.1214	0.131291
Free Glucose	histamine	1574	-0.36831	0.0194	FBgn0036266	3L:12197223-12199122	-0.45377	0.0037	2L_10819429_SNP	0.2051	9.28648e-06	0.0001593	0.00172414	SiteClass[FBgn0032303|CG6508|NON_SYNONYMOUS_CODING|0;FBgn0011676|Nos|INTRON|0],TranscriptAnnot[NON_SYNONYMOUS_CODING(MODERATE|MISSENSE|Gta/Ata|V103I|423|CG6508|protein_coding|CODING|FBtr0080139|1|1);INTRON(MODIFIER||||1349|Nos|protein_coding|CODING|FBtr0080188|8|1);INTRON(MODIFIER||||756|Nos|protein_coding|CODING|FBtr0100489|8|1);INTRON(MODIFIER||||1098|Nos|protein_coding|CODING|FBtr0343888|6|1)]	Free Glucose	0.11356	0.4912	0.131291
Free Glucose	histamine	1574	-0.36831	0.0194	FBgn0031150	X:20924990-20953418	-0.50013	0.0012	2L_10819429_SNP	0.2051	9.28648e-06	8.59e-05	0.00172414	SiteClass[FBgn0032303|CG6508|NON_SYNONYMOUS_CODING|0;FBgn0011676|Nos|INTRON|0],TranscriptAnnot[NON_SYNONYMOUS_CODING(MODERATE|MISSENSE|Gta/Ata|V103I|423|CG6508|protein_coding|CODING|FBtr0080139|1|1);INTRON(MODIFIER||||1349|Nos|protein_coding|CODING|FBtr0080188|8|1);INTRON(MODIFIER||||756|Nos|protein_coding|CODING|FBtr0100489|8|1);INTRON(MODIFIER||||1098|Nos|protein_coding|CODING|FBtr0343888|6|1)]	Free Glucose	0.17166	0.2961	0.131291
Free Glucose	histamine	1574	-0.36831	0.0194	FBgn0034725	2R:18291682-18296045	-0.45832	0.0033	2L_10819429_SNP	0.2051	9.28648e-06	1.996e-05	0.00172414	SiteClass[FBgn0032303|CG6508|NON_SYNONYMOUS_CODING|0;FBgn0011676|Nos|INTRON|0],TranscriptAnnot[NON_SYNONYMOUS_CODING(MODERATE|MISSENSE|Gta/Ata|V103I|423|CG6508|protein_coding|CODING|FBtr0080139|1|1);INTRON(MODIFIER||||1349|Nos|protein_coding|CODING|FBtr0080188|8|1);INTRON(MODIFIER||||756|Nos|protein_coding|CODING|FBtr0100489|8|1);INTRON(MODIFIER||||1098|Nos|protein_coding|CODING|FBtr0343888|6|1)]	Free Glucose	-0.21296	0.193	0.131291
Free Glucose	glycerol 3-phosphate	43847	0.38386	0.0145	XLOC_019466	3LHet:1266206-1267612	-0.46559	0.0028	2L_11467535_DEL	0.1538	7.9506e-06	0.0001853	0.000235849	SiteClass[|||],TranscriptAnnot[INTERGENIC(MODIFIER||||||||||1)]	Free Glucose	-0.14919	0.3647	0.0708929
Free Glucose	1-methylurate	34395	-0.39231	0.0123	FBgn0063493	2R:14294429-14295193	-0.5081	0.001	2L_11917671_DEL	0.1081	2.25713e-06	2.479e-06	0.000420168	SiteClass[FBgn0264815|Pde1c|INTRON|0],TranscriptAnnot[INTRON(MODIFIER||||834|Pde1c|protein_coding|CODING|FBtr0334136|2|1);INTRON(MODIFIER||||834|Pde1c|protein_coding|CODING|FBtr0334140|2|1)]	Free Glucose	0.25951	0.1106	0.602928
Free Glucose	glycerol 3-phosphate	43847	0.38386	0.0145	FBgn0032222	2L:10331471-10333129	0.48745	0.0016	2L_11952168_SNP	0.1053	2.29468e-06	0.0002127	0.000235849	SiteClass[FBgn0263019|CR43314|DOWNSTREAM|32],TranscriptAnnot[DOWNSTREAM(MODIFIER||32|||CR43314|ncRNA|NON_CODING|FBtr0306899||1);INTERGENIC(MODIFIER||||||||||1)]	Free Glucose	0.0415	0.8019	0.00961007
Free Glucose	histamine	1574	-0.36831	0.0194	FBgn0031150	X:20924990-20953418	-0.50013	0.0012	2L_12415975_SNP	0.1389	3.35053e-06	0.0001426	0.00172414	SiteClass[FBgn0043841|vir-1|INTRON|0],TranscriptAnnot[INTRON(MODIFIER||||431|vir-1|protein_coding|CODING|FBtr0080389|2|1);INTRON(MODIFIER||||431|vir-1|protein_coding|CODING|FBtr0080390|1|1);INTRON(MODIFIER||||234|vir-1|protein_coding|CODING|FBtr0080391|1|1);INTRON(MODIFIER||||423|vir-1|protein_coding|CODING|FBtr0334761|2|1);INTRON(MODIFIER||||234|vir-1|protein_coding|CODING|FBtr0334762|2|1)]	Free Glucose	0.17166	0.2961	0.154005
Free Glucose	histamine	1574	-0.36831	0.0194	FBgn0034725	2R:18291682-18296045	-0.45832	0.0033	2L_12415975_SNP	0.1389	3.35053e-06	0.000962	0.00172414	SiteClass[FBgn0043841|vir-1|INTRON|0],TranscriptAnnot[INTRON(MODIFIER||||431|vir-1|protein_coding|CODING|FBtr0080389|2|1);INTRON(MODIFIER||||431|vir-1|protein_coding|CODING|FBtr0080390|1|1);INTRON(MODIFIER||||234|vir-1|protein_coding|CODING|FBtr0080391|1|1);INTRON(MODIFIER||||423|vir-1|protein_coding|CODING|FBtr0334761|2|1);INTRON(MODIFIER||||234|vir-1|protein_coding|CODING|FBtr0334762|2|1)]	Free Glucose	-0.21296	0.193	0.154005
Free Glucose	histamine	1574	-0.36831	0.0194	FBgn0034725	2R:18291682-18296045	-0.45832	0.0033	2L_12416002_SNP	0.1316	2.73171e-06	0.0004931	0.00172414	SiteClass[FBgn0043841|vir-1|INTRON|0],TranscriptAnnot[INTRON(MODIFIER||||431|vir-1|protein_coding|CODING|FBtr0080389|2|1);INTRON(MODIFIER||||431|vir-1|protein_coding|CODING|FBtr0080390|1|1);INTRON(MODIFIER||||234|vir-1|protein_coding|CODING|FBtr0080391|1|1);INTRON(MODIFIER||||423|vir-1|protein_coding|CODING|FBtr0334761|2|1);INTRON(MODIFIER||||234|vir-1|protein_coding|CODING|FBtr0334762|2|1)]	Free Glucose	-0.21296	0.193	0.174604
Free Glucose	histamine	1574	-0.36831	0.0194	FBgn0031150	X:20924990-20953418	-0.50013	0.0012	2L_12416002_SNP	0.1316	2.73171e-06	0.0001261	0.00172414	SiteClass[FBgn0043841|vir-1|INTRON|0],TranscriptAnnot[INTRON(MODIFIER||||431|vir-1|protein_coding|CODING|FBtr0080389|2|1);INTRON(MODIFIER||||431|vir-1|protein_coding|CODING|FBtr0080390|1|1);INTRON(MODIFIER||||234|vir-1|protein_coding|CODING|FBtr0080391|1|1);INTRON(MODIFIER||||423|vir-1|protein_coding|CODING|FBtr0334761|2|1);INTRON(MODIFIER||||234|vir-1|protein_coding|CODING|FBtr0334762|2|1)]	Free Glucose	0.17166	0.2961	0.174604
Free Glucose	histamine	1574	-0.36831	0.0194	FBgn0036266	3L:12197223-12199122	-0.45377	0.0037	2L_12416010_SNP	0.1538	5.88363e-06	0.001173	0.00172414	SiteClass[FBgn0043841|vir-1|INTRON|0],TranscriptAnnot[INTRON(MODIFIER||||431|vir-1|protein_coding|CODING|FBtr0080389|2|1);INTRON(MODIFIER||||431|vir-1|protein_coding|CODING|FBtr0080390|1|1);INTRON(MODIFIER||||234|vir-1|protein_coding|CODING|FBtr0080391|1|1);INTRON(MODIFIER||||423|vir-1|protein_coding|CODING|FBtr0334761|2|1);INTRON(MODIFIER||||234|vir-1|protein_coding|CODING|FBtr0334762|2|1)]	Free Glucose	0.11356	0.4912	0.215452
Free Glucose	histamine	1574	-0.36831	0.0194	FBgn0031150	X:20924990-20953418	-0.50013	0.0012	2L_12416010_SNP	0.1538	5.88363e-06	0.0001334	0.00172414	SiteClass[FBgn0043841|vir-1|INTRON|0],TranscriptAnnot[INTRON(MODIFIER||||431|vir-1|protein_coding|CODING|FBtr0080389|2|1);INTRON(MODIFIER||||431|vir-1|protein_coding|CODING|FBtr0080390|1|1);INTRON(MODIFIER||||234|vir-1|protein_coding|CODING|FBtr0080391|1|1);INTRON(MODIFIER||||423|vir-1|protein_coding|CODING|FBtr0334761|2|1);INTRON(MODIFIER||||234|vir-1|protein_coding|CODING|FBtr0334762|2|1)]	Free Glucose	0.17166	0.2961	0.215452
Free Glucose	histamine	1574	-0.36831	0.0194	FBgn0034725	2R:18291682-18296045	-0.45832	0.0033	2L_12416010_SNP	0.1538	5.88363e-06	0.001561	0.00172414	SiteClass[FBgn0043841|vir-1|INTRON|0],TranscriptAnnot[INTRON(MODIFIER||||431|vir-1|protein_coding|CODING|FBtr0080389|2|1);INTRON(MODIFIER||||431|vir-1|protein_coding|CODING|FBtr0080390|1|1);INTRON(MODIFIER||||234|vir-1|protein_coding|CODING|FBtr0080391|1|1);INTRON(MODIFIER||||423|vir-1|protein_coding|CODING|FBtr0334761|2|1);INTRON(MODIFIER||||234|vir-1|protein_coding|CODING|FBtr0334762|2|1)]	Free Glucose	-0.21296	0.193	0.215452
Free Glucose	3-hydroxypropanoate	1556	-0.34071	0.0314	FBgn0036956	3L:20224769-20226355	0.53846	0.0004	2L_12518394_SNP	0.2368	6.09987e-06	3.715e-05	0.000431034	SiteClass[FBgn0259176|bun|INTRON|0],TranscriptAnnot[INTRON(MODIFIER||||1137|bun|protein_coding|CODING|FBtr0346622|4|1);INTRON(MODIFIER||||1206|bun|protein_coding|CODING|FBtr0300521|4|1);INTRON(MODIFIER||||1097|bun|protein_coding|CODING|FBtr0300523|5|1);INTRON(MODIFIER||||1331|bun|protein_coding|CODING|FBtr0299658|5|1)]	Free Glucose	-0.05628	0.7336	0.305596
Free Glucose	glycerol 3-phosphate	43847	0.38386	0.0145	FBgn0032222	2L:10331471-10333129	0.48745	0.0016	2L_12699899_SNP	0.1282	2.18357e-09	0.0002261	0.000235849	SiteClass[FBgn0032449|CG17036|NON_SYNONYMOUS_CODING|0;FBgn0032447|PICK1|DOWNSTREAM|982],TranscriptAnnot[NON_SYNONYMOUS_CODING(MODERATE|MISSENSE|Acc/Gcc|T206A|432|CG17036|protein_coding|CODING|FBtr0080408|1|1);NON_SYNONYMOUS_CODING(MODERATE|MISSENSE|Acc/Gcc|T206A|432|CG17036|protein_coding|CODING|FBtr0340545|1|1);DOWNSTREAM(MODIFIER||982||504|PICK1|protein_coding|CODING|FBtr0080395||1);DOWNSTREAM(…	Free Glucose	0.0415	0.8019	0.13481
Free Glucose	glycerol 3-phosphate	43847	0.38386	0.0145	FBgn0032222	2L:10331471-10333129	0.48745	0.0016	2L_12701533_SNP	0.175	3.61951e-06	0.0001999	0.000235849	SiteClass[FBgn0032450|CG5776|UTR_3_PRIME|0;FBgn0032449|CG17036|UPSTREAM|787],TranscriptAnnot[UTR_3_PRIME(MODIFIER||357||799|CG5776|protein_coding|CODING|FBtr0329925|3|1);UTR_3_PRIME(MODIFIER||357||799|CG5776|protein_coding|CODING|FBtr0080407|3|1);UPSTREAM(MODIFIER||889||432|CG17036|protein_coding|CODING|FBtr0080408||1);UPSTREAM(MODIFIER||787||432|CG17036|protein_coding|CODING|FBtr0340545||1)]	Free Glucose	0.0415	0.8019	0.447106
Free Glucose	histamine	1574	-0.36831	0.0194	FBgn0039326	3R:21146775-21148479	-0.47634	0.0022	2L_13232959_SNP	0.1053	8.20372e-06	0.0004022	0.00172414	SiteClass[FBgn0032492|Prosalpha6T|SYNONYMOUS_CODING|0;FBgn0032493|CG15479|DOWNSTREAM|839],TranscriptAnnot[SYNONYMOUS_CODING(LOW|SILENT|ggC/ggT|G284|289|Prosalpha6T|protein_coding|CODING|FBtr0080448|1|1);DOWNSTREAM(MODIFIER||839||206|CG15479|protein_coding|CODING|FBtr0080481||1)]	Free Glucose	0.42814	0.0065	0.0763838
Free Glucose	flavin mononucleotide (FMN)	15797	0.40375	0.0098	FBgn0261285	3R:14964776-14973632	-0.48077	0.0019	2L_13464012_SNP	0.2105	4.57556e-06	0.0004239	0.00217391	SiteClass[FBgn0263354|CG42784|INTRON|0],TranscriptAnnot[INTRON(MODIFIER||||984|CG42784|protein_coding|CODING|FBtr0308949|3|1);INTRON(MODIFIER||||628|CG42784|protein_coding|CODING|FBtr0308952|1|1)]	Free Glucose	-0.0917	0.5788	0.146566
Free Glucose	flavin mononucleotide (FMN)	15797	0.40375	0.0098	FBgn0085427	2L:8898786-8933594	-0.47652	0.0022	2L_13464012_SNP	0.2105	4.57556e-06	0.0006144	0.00217391	SiteClass[FBgn0263354|CG42784|INTRON|0],TranscriptAnnot[INTRON(MODIFIER||||984|CG42784|protein_coding|CODING|FBtr0308949|3|1);INTRON(MODIFIER||||628|CG42784|protein_coding|CODING|FBtr0308952|1|1)]	Free Glucose	-0.10789	0.5132	0.146566
Free Glucose	flavin mononucleotide (FMN)	15797	0.40375	0.0098	FBgn0085413	3R:3640083-3681114	-0.46113	0.0031	2L_13464012_SNP	0.2105	4.57556e-06	5.878e-05	0.00217391	SiteClass[FBgn0263354|CG42784|INTRON|0],TranscriptAnnot[INTRON(MODIFIER||||984|CG42784|protein_coding|CODING|FBtr0308949|3|1);INTRON(MODIFIER||||628|CG42784|protein_coding|CODING|FBtr0308952|1|1)]	Free Glucose	-0.10243	0.5349	0.146566
Free Glucose	flavin mononucleotide (FMN)	15797	0.40375	0.0098	FBgn0030105	X:9110905-9111499	0.4664	0.0028	2L_13464012_SNP	0.2105	4.57556e-06	0.0003759	0.00217391	SiteClass[FBgn0263354|CG42784|INTRON|0],TranscriptAnnot[INTRON(MODIFIER||||984|CG42784|protein_coding|CODING|FBtr0308949|3|1);INTRON(MODIFIER||||628|CG42784|protein_coding|CODING|FBtr0308952|1|1)]	Free Glucose	0.02105	0.8988	0.146566
Free Glucose	flavin mononucleotide (FMN)	15797	0.40375	0.0098	FBgn0085413	3R:3640083-3681114	-0.46113	0.0031	2L_13464618_SNP	0.2051	7.11415e-06	4.751e-05	0.00217391	SiteClass[FBgn0263354|CG42784|INTRON|0],TranscriptAnnot[INTRON(MODIFIER||||984|CG42784|protein_coding|CODING|FBtr0308949|3|1);INTRON(MODIFIER||||628|CG42784|protein_coding|CODING|FBtr0308952|1|1)]	Free Glucose	-0.10243	0.5349	0.14811
Free Glucose	flavin mononucleotide (FMN)	15797	0.40375	0.0098	FBgn0030105	X:9110905-9111499	0.4664	0.0028	2L_13464618_SNP	0.2051	7.11415e-06	0.0008207	0.00217391	SiteClass[FBgn0263354|CG42784|INTRON|0],TranscriptAnnot[INTRON(MODIFIER||||984|CG42784|protein_coding|CODING|FBtr0308949|3|1);INTRON(MODIFIER||||628|CG42784|protein_coding|CODING|FBtr0308952|1|1)]	Free Glucose	0.02105	0.8988	0.14811
Free Glucose	flavin mononucleotide (FMN)	15797	0.40375	0.0098	FBgn0261285	3R:14964776-14973632	-0.48077	0.0019	2L_13464618_SNP	0.2051	7.11415e-06	0.0004112	0.00217391	SiteClass[FBgn0263354|CG42784|INTRON|0],TranscriptAnnot[INTRON(MODIFIER||||984|CG42784|protein_coding|CODING|FBtr0308949|3|1);INTRON(MODIFIER||||628|CG42784|protein_coding|CODING|FBtr0308952|1|1)]	Free Glucose	-0.0917	0.5788	0.14811
Free Glucose	flavin mononucleotide (FMN)	15797	0.40375	0.0098	FBgn0085427	2L:8898786-8933594	-0.47652	0.0022	2L_13464618_SNP	0.2051	7.11415e-06	0.001113	0.00217391	SiteClass[FBgn0263354|CG42784|INTRON|0],TranscriptAnnot[INTRON(MODIFIER||||984|CG42784|protein_coding|CODING|FBtr0308949|3|1);INTRON(MODIFIER||||628|CG42784|protein_coding|CODING|FBtr0308952|1|1)]	Free Glucose	-0.10789	0.5132	0.14811
Free Glucose	1-methylurate	34395	-0.39231	0.0123	XLOC_026860	4:942987-950743	-0.45547	0.0036	2L_13866813_SNP	0.1026	6.7312e-07	0.0002932	0.000420168	SiteClass[FBgn0028509|CenG1A|INTRON|0;FBgn0266142|CR44848|UPSTREAM|123],TranscriptAnnot[UPSTREAM(MODIFIER||123|||CR44848|ncRNA|NON_CODING|FBtr0343670||1);INTRON(MODIFIER||||995|CenG1A|protein_coding|CODING|FBtr0080546|1|1)]	Free Glucose	0.15101	0.3588	0.405916
Free Glucose	3-hydroxypropanoate	1556	-0.34071	0.0314	FBgn0028952	2L:2045494-2048054	0.50304	0.0011	2L_14932769_SNP	0.2051	9.06127e-07	0.0001773	0.000431034	SiteClass[FBgn0259213|CG42313|INTRON|0],TranscriptAnnot[INTRON(MODIFIER||||1064|CG42313|protein_coding|CODING|FBtr0299711|8|1);INTRON(MODIFIER||||1064|CG42313|protein_coding|CODING|FBtr0345431|8|1)]	Free Glucose	-0.01215	0.9415	0.101136
Free Glucose	3-hydroxypropanoate	1556	-0.34071	0.0314	XLOC_006366	2R:736073-743354	-0.5751	0.0001	2L_14932769_SNP	0.2051	9.06127e-07	0.000325	0.000431034	SiteClass[FBgn0259213|CG42313|INTRON|0],TranscriptAnnot[INTRON(MODIFIER||||1064|CG42313|protein_coding|CODING|FBtr0299711|8|1);INTRON(MODIFIER||||1064|CG42313|protein_coding|CODING|FBtr0345431|8|1)]	Free Glucose	0.15425	0.3485	0.101136
Free Glucose	3-hydroxypropanoate	1556	-0.34071	0.0314	FBgn0033913	2R:10107403-10118125	-0.4915	0.0015	2L_14932769_SNP	0.2051	9.06127e-07	0.000269	0.000431034	SiteClass[FBgn0259213|CG42313|INTRON|0],TranscriptAnnot[INTRON(MODIFIER||||1064|CG42313|protein_coding|CODING|FBtr0299711|8|1);INTRON(MODIFIER||||1064|CG42313|protein_coding|CODING|FBtr0345431|8|1)]	Free Glucose	-0.04332	0.7934	0.101136
Free Glucose	3-hydroxypropanoate	1556	-0.34071	0.0314	FBgn0033913	2R:10107403-10118125	-0.4915	0.0015	2L_14933000_SNP	0.2051	9.13518e-06	0.0001192	0.000431034	SiteClass[FBgn0259213|CG42313|INTRON|0],TranscriptAnnot[INTRON(MODIFIER||||1064|CG42313|protein_coding|CODING|FBtr0299711|8|1);INTRON(MODIFIER||||1064|CG42313|protein_coding|CODING|FBtr0345431|8|1)]	Free Glucose	-0.04332	0.7934	0.206558
Free Glucose	kojibiose	21040	0.55872	0.0002	FBgn0000406	2L:16788774-16790721	0.57166	0.0001	2L_15386261_INS	0.3421	5.96662e-06	0.0004077	0.00357143	SiteClass[|||],TranscriptAnnot[INTERGENIC(MODIFIER||||||||||1)]	Free Glucose	0.09555	0.5629	0.25089
Free Glucose	kojibiose	21040	0.55872	0.0002	FBgn0025833	2R:12762229-12783157	0.55385	0.0003	2L_15386261_INS	0.3421	5.96662e-06	0.0005086	0.00357143	SiteClass[|||],TranscriptAnnot[INTERGENIC(MODIFIER||||||||||1)]	Free Glucose	0.19717	0.2289	0.25089
Free Glucose	kojibiose	21040	0.55872	0.0002	FBgn0025833	2R:12762229-12783157	0.55385	0.0003	2L_15386524_SNP	0.3158	3.22824e-06	0.002964	0.00357143	SiteClass[|||],TranscriptAnnot[INTERGENIC(MODIFIER||||||||||1)]	Free Glucose	0.19717	0.2289	0.000830584
Free Glucose	kojibiose	21040	0.55872	0.0002	XLOC_027796	U:8483039-8483603	-0.59575	<.0001	2L_15386524_SNP	0.3158	3.22824e-06	0.0009087	0.00357143	SiteClass[|||],TranscriptAnnot[INTERGENIC(MODIFIER||||||||||1)]	Free Glucose	-0.23926	0.1424	0.000830584
Free Glucose	kojibiose	21040	0.55872	0.0002	FBgn0028949	2L:15613905-15614828	0.49271	0.0014	2L_15386524_SNP	0.3158	3.22824e-06	0.002687	0.00357143	SiteClass[|||],TranscriptAnnot[INTERGENIC(MODIFIER||||||||||1)]	Free Glucose	0.09534	0.5637	0.000830584
Free Glucose	kojibiose	21040	0.55872	0.0002	FBgn0263199	3L:8975312-8979191	0.51093	0.0009	2L_15386524_SNP	0.3158	3.22824e-06	0.002521	0.00357143	SiteClass[|||],TranscriptAnnot[INTERGENIC(MODIFIER||||||||||1)]	Free Glucose	0.05061	0.7596	0.000830584
Free Glucose	kojibiose	21040	0.55872	0.0002	FBgn0031888	2L:7069536-7084635	-0.55709	0.0002	2L_15386524_SNP	0.3158	3.22824e-06	0.001476	0.00357143	SiteClass[|||],TranscriptAnnot[INTERGENIC(MODIFIER||||||||||1)]	Free Glucose	-0.01822	0.9123	0.000830584
Free Glucose	kojibiose	21040	0.55872	0.0002	FBgn0000536	X:16172361-16179651	-0.47368	0.0023	2L_15386524_SNP	0.3158	3.22824e-06	0.001055	0.00357143	SiteClass[|||],TranscriptAnnot[INTERGENIC(MODIFIER||||||||||1)]	Free Glucose	-0.36498	0.0223	0.000830584
Free Glucose	kojibiose	21040	0.55872	0.0002	FBgn0000406	2L:16788774-16790721	0.57166	0.0001	2L_15386524_SNP	0.3158	3.22824e-06	0.002621	0.00357143	SiteClass[|||],TranscriptAnnot[INTERGENIC(MODIFIER||||||||||1)]	Free Glucose	0.09555	0.5629	0.000830584
Free Glucose	histamine	1574	-0.36831	0.0194	FBgn0029710	X:4436663-4438530	-0.51116	0.0009	2L_15411894_SNP	0.1053	8.98732e-06	0.00041	0.00172414	SiteClass[|||],TranscriptAnnot[INTERGENIC(MODIFIER||||||||||1)]	Free Glucose	-0.16275	0.3222	0.861763
Free Glucose	histamine	1574	-0.36831	0.0194	XLOC_017830	3L:15931447-15935182	0.49162	0.0015	2L_15411894_SNP	0.1053	8.98732e-06	0.001539	0.00172414	SiteClass[|||],TranscriptAnnot[INTERGENIC(MODIFIER||||||||||1)]	Free Glucose	-0.12611	0.4443	0.861763
Free Glucose	histamine	1574	-0.36831	0.0194	FBgn0034725	2R:18291682-18296045	-0.45832	0.0033	2L_15411894_SNP	0.1053	8.98732e-06	0.001196	0.00172414	SiteClass[|||],TranscriptAnnot[INTERGENIC(MODIFIER||||||||||1)]	Free Glucose	-0.21296	0.193	0.861763
Free Glucose	histamine	1574	-0.36831	0.0194	FBgn0039326	3R:21146775-21148479	-0.47634	0.0022	2L_15411894_SNP	0.1053	8.98732e-06	0.0003745	0.00172414	SiteClass[|||],TranscriptAnnot[INTERGENIC(MODIFIER||||||||||1)]	Free Glucose	0.42814	0.0065	0.861763
Free Glucose	panose	37284	0.39606	0.0114	FBgn0031888	2L:7069536-7084635	-0.52692	0.0006	2L_1619059_SNP	0.1282	6.54043e-06	0.0003756	0.00138889	SiteClass[FBgn0265814|CR44603|DOWNSTREAM|353],TranscriptAnnot[DOWNSTREAM(MODIFIER||353|||CR44603|ncRNA|NON_CODING|FBtr0342646||1);EXON(MODIFIER|||||CR44603|ncRNA|NON_CODING|FBtr0342645|2|1)]	Free Glucose	-0.01822	0.9123	0.291646
Free Glucose	panose	37284	0.39606	0.0114	FBgn0039114	3R:19589579-19592384	0.45648	0.0035	2L_1619059_SNP	0.1282	6.54043e-06	0.0004043	0.00138889	SiteClass[FBgn0265814|CR44603|DOWNSTREAM|353],TranscriptAnnot[DOWNSTREAM(MODIFIER||353|||CR44603|ncRNA|NON_CODING|FBtr0342646||1);EXON(MODIFIER|||||CR44603|ncRNA|NON_CODING|FBtr0342645|2|1)]	Free Glucose	-0.03927	0.8124	0.291646
Free Glucose	glycerol 3-phosphate	43847	0.38386	0.0145	FBgn0032222	2L:10331471-10333129	0.48745	0.0016	2L_16525244_SNP	0.125	2.24851e-09	4.242e-05	0.000235849	SiteClass[FBgn0032587|CG5953|INTRON|0],TranscriptAnnot[INTRON(MODIFIER||||701|CG5953|protein_coding|CODING|FBtr0080873|2|1);INTRON(MODIFIER||||701|CG5953|protein_coding|CODING|FBtr0080874|2|1);INTRON(MODIFIER||||701|CG5953|protein_coding|CODING|FBtr0337091|2|1)]	Free Glucose	0.0415	0.8019	0.0111096
Free Glucose	3-hydroxypropanoate	1556	-0.34071	0.0314	FBgn0031821	2L:6487342-6488756	-0.61113	<.0001	2L_20951898_SNP	0.2105	3.04451e-06	4.084e-05	0.000431034	SiteClass[|||],TranscriptAnnot[INTERGENIC(MODIFIER||||||||||1)]	Free Glucose	0.03239	0.8448	0.318733
Free Glucose	3-hydroxypropanoate	1556	-0.34071	0.0314	FBgn0040260	2L:16799025-16801584	-0.46235	0.003	2L_20951898_SNP	0.2105	3.04451e-06	0.0003384	0.000431034	SiteClass[|||],TranscriptAnnot[INTERGENIC(MODIFIER||||||||||1)]	Free Glucose	0.37834	0.0176	0.318733
Free Glucose	flavin mononucleotide (FMN)	15797	0.40375	0.0098	FBgn0085427	2L:8898786-8933594	-0.47652	0.0022	2L_20960180_SNP	0.1842	1.89294e-06	0.0004919	0.00217391	SiteClass[|||],TranscriptAnnot[INTERGENIC(MODIFIER||||||||||1)]	Free Glucose	-0.10789	0.5132	0.524753
Free Glucose	flavin mononucleotide (FMN)	15797	0.40375	0.0098	FBgn0039004	3R:18516329-18520494	0.46741	0.0027	2L_20960180_SNP	0.1842	1.89294e-06	0.001084	0.00217391	SiteClass[|||],TranscriptAnnot[INTERGENIC(MODIFIER||||||||||1)]	Free Glucose	-0.1998	0.2227	0.524753
Free Glucose	flavin mononucleotide (FMN)	15797	0.40375	0.0098	FBgn0038504	3R:13220921-13228237	0.45344	0.0037	2L_20960180_SNP	0.1842	1.89294e-06	0.0002283	0.00217391	SiteClass[|||],TranscriptAnnot[INTERGENIC(MODIFIER||||||||||1)]	Free Glucose	-0.02874	0.8621	0.524753
Free Glucose	flavin mononucleotide (FMN)	15797	0.40375	0.0098	FBgn0033635	2R:7323748-7329721	0.45547	0.0036	2L_20960180_SNP	0.1842	1.89294e-06	0.0008449	0.00217391	SiteClass[|||],TranscriptAnnot[INTERGENIC(MODIFIER||||||||||1)]	Free Glucose	-0.06781	0.6817	0.524753
Free Glucose	flavin mononucleotide (FMN)	15797	0.40375	0.0098	FBgn0052373	3L:7643648-7752223	-0.5419	0.0004	2L_20960180_SNP	0.1842	1.89294e-06	0.001042	0.00217391	SiteClass[|||],TranscriptAnnot[INTERGENIC(MODIFIER||||||||||1)]	Free Glucose	0.24393	0.1345	0.524753
Free Glucose	flavin mononucleotide (FMN)	15797	0.40375	0.0098	FBgn0029105	2R:19845365-19849154	-0.48866	0.0016	2L_20960180_SNP	0.1842	1.89294e-06	0.0007464	0.00217391	SiteClass[|||],TranscriptAnnot[INTERGENIC(MODIFIER||||||||||1)]	Free Glucose	-0.12227	0.4584	0.524753
Free Glucose	flavin mononucleotide (FMN)	15797	0.40375	0.0098	FBgn0085413	3R:3640083-3681114	-0.46113	0.0031	2L_20960180_SNP	0.1842	1.89294e-06	0.0002327	0.00217391	SiteClass[|||],TranscriptAnnot[INTERGENIC(MODIFIER||||||||||1)]	Free Glucose	-0.10243	0.5349	0.524753
Free Glucose	propionylcarnitine	32452	-0.34747	0.028	FBgn0040732	2R:15387800-15388923	-0.4749	0.0023	2L_211264_SNP	0.1026	2.36016e-06	0.0001638	0.0015625	SiteClass[FBgn0266557|kis|UTR_3_PRIME|0;FBgn0031233|Tbc1d15-17|DOWNSTREAM|539],TranscriptAnnot[UTR_3_PRIME(MODIFIER||921||5517|kis|protein_coding|CODING|FBtr0299837|17|1);UTR_3_PRIME(MODIFIER||921||2151|kis|protein_coding|CODING|FBtr0078145|7|1);UTR_3_PRIME(MODIFIER||921||5322|kis|protein_coding|CODING|FBtr0078144|18|1);UTR_3_PRIME(MODIFIER||921||5191|kis|protein_coding|CODING|FBtr0308255|17|1);U…	Free Glucose	0.32834	0.0413	0.264585
Free Glucose	propionylcarnitine	32452	-0.34747	0.028	FBgn0051956	2L:3472603-3475338	0.46194	0.0031	2L_211264_SNP	0.1026	2.36016e-06	0.0004909	0.0015625	SiteClass[FBgn0266557|kis|UTR_3_PRIME|0;FBgn0031233|Tbc1d15-17|DOWNSTREAM|539],TranscriptAnnot[UTR_3_PRIME(MODIFIER||921||5517|kis|protein_coding|CODING|FBtr0299837|17|1);UTR_3_PRIME(MODIFIER||921||2151|kis|protein_coding|CODING|FBtr0078145|7|1);UTR_3_PRIME(MODIFIER||921||5322|kis|protein_coding|CODING|FBtr0078144|18|1);UTR_3_PRIME(MODIFIER||921||5191|kis|protein_coding|CODING|FBtr0308255|17|1);U…	Free Glucose	-0.17773	0.279	0.264585
Free Glucose	propionylcarnitine	32452	-0.34747	0.028	XLOC_016571	3L:7252064-7253515	0.49231	0.0015	2L_211264_SNP	0.1026	2.36016e-06	0.001058	0.0015625	SiteClass[FBgn0266557|kis|UTR_3_PRIME|0;FBgn0031233|Tbc1d15-17|DOWNSTREAM|539],TranscriptAnnot[UTR_3_PRIME(MODIFIER||921||5517|kis|protein_coding|CODING|FBtr0299837|17|1);UTR_3_PRIME(MODIFIER||921||2151|kis|protein_coding|CODING|FBtr0078145|7|1);UTR_3_PRIME(MODIFIER||921||5322|kis|protein_coding|CODING|FBtr0078144|18|1);UTR_3_PRIME(MODIFIER||921||5191|kis|protein_coding|CODING|FBtr0308255|17|1);U…	Free Glucose	-0.06579	0.6907	0.264585
Free Glucose	propionylcarnitine	32452	-0.34747	0.028	XLOC_022569	3R:25692413-25694244	0.4502	0.004	2L_211264_SNP	0.1026	2.36016e-06	6.27e-05	0.0015625	SiteClass[FBgn0266557|kis|UTR_3_PRIME|0;FBgn0031233|Tbc1d15-17|DOWNSTREAM|539],TranscriptAnnot[UTR_3_PRIME(MODIFIER||921||5517|kis|protein_coding|CODING|FBtr0299837|17|1);UTR_3_PRIME(MODIFIER||921||2151|kis|protein_coding|CODING|FBtr0078145|7|1);UTR_3_PRIME(MODIFIER||921||5322|kis|protein_coding|CODING|FBtr0078144|18|1);UTR_3_PRIME(MODIFIER||921||5191|kis|protein_coding|CODING|FBtr0308255|17|1);U…	Free Glucose	0.10223	0.5357	0.264585
Free Glucose	propionylcarnitine	32452	-0.34747	0.028	FBgn0025286	2R:5474698-5475494	-0.47126	0.0025	2L_211264_SNP	0.1026	2.36016e-06	0.000395	0.0015625	SiteClass[FBgn0266557|kis|UTR_3_PRIME|0;FBgn0031233|Tbc1d15-17|DOWNSTREAM|539],TranscriptAnnot[UTR_3_PRIME(MODIFIER||921||5517|kis|protein_coding|CODING|FBtr0299837|17|1);UTR_3_PRIME(MODIFIER||921||2151|kis|protein_coding|CODING|FBtr0078145|7|1);UTR_3_PRIME(MODIFIER||921||5322|kis|protein_coding|CODING|FBtr0078144|18|1);UTR_3_PRIME(MODIFIER||921||5191|kis|protein_coding|CODING|FBtr0308255|17|1);U…	Free Glucose	0.04676	0.7774	0.264585
Free Glucose	propionylcarnitine	32452	-0.34747	0.028	FBgn0017448	3R:27581078-27584359	0.45486	0.0036	2L_211264_SNP	0.1026	2.36016e-06	0.001246	0.0015625	SiteClass[FBgn0266557|kis|UTR_3_PRIME|0;FBgn0031233|Tbc1d15-17|DOWNSTREAM|539],TranscriptAnnot[UTR_3_PRIME(MODIFIER||921||5517|kis|protein_coding|CODING|FBtr0299837|17|1);UTR_3_PRIME(MODIFIER||921||2151|kis|protein_coding|CODING|FBtr0078145|7|1);UTR_3_PRIME(MODIFIER||921||5322|kis|protein_coding|CODING|FBtr0078144|18|1);UTR_3_PRIME(MODIFIER||921||5191|kis|protein_coding|CODING|FBtr0308255|17|1);U…	Free Glucose	-0.27551	0.0896	0.264585
Free Glucose	propionylcarnitine	32452	-0.34747	0.028	FBgn0037481	3R:2979960-2980902	-0.48603	0.0017	2L_211264_SNP	0.1026	2.36016e-06	0.001061	0.0015625	SiteClass[FBgn0266557|kis|UTR_3_PRIME|0;FBgn0031233|Tbc1d15-17|DOWNSTREAM|539],TranscriptAnnot[UTR_3_PRIME(MODIFIER||921||5517|kis|protein_coding|CODING|FBtr0299837|17|1);UTR_3_PRIME(MODIFIER||921||2151|kis|protein_coding|CODING|FBtr0078145|7|1);UTR_3_PRIME(MODIFIER||921||5322|kis|protein_coding|CODING|FBtr0078144|18|1);UTR_3_PRIME(MODIFIER||921||5191|kis|protein_coding|CODING|FBtr0308255|17|1);U…	Free Glucose	-0.01154	0.9444	0.264585
Free Glucose	propionylcarnitine	32452	-0.34747	0.028	FBgn0037090	3L:21494521-21497059	-0.46579	0.0028	2L_211264_SNP	0.1026	2.36016e-06	0.0004423	0.0015625	SiteClass[FBgn0266557|kis|UTR_3_PRIME|0;FBgn0031233|Tbc1d15-17|DOWNSTREAM|539],TranscriptAnnot[UTR_3_PRIME(MODIFIER||921||5517|kis|protein_coding|CODING|FBtr0299837|17|1);UTR_3_PRIME(MODIFIER||921||2151|kis|protein_coding|CODING|FBtr0078145|7|1);UTR_3_PRIME(MODIFIER||921||5322|kis|protein_coding|CODING|FBtr0078144|18|1);UTR_3_PRIME(MODIFIER||921||5191|kis|protein_coding|CODING|FBtr0308255|17|1);U…	Free Glucose	0.06619	0.6889	0.264585
Free Glucose	propionylcarnitine	32452	-0.34747	0.028	FBgn0035906	3L:8514529-8516601	-0.47206	0.0024	2L_211264_SNP	0.1026	2.36016e-06	0.0003068	0.0015625	SiteClass[FBgn0266557|kis|UTR_3_PRIME|0;FBgn0031233|Tbc1d15-17|DOWNSTREAM|539],TranscriptAnnot[UTR_3_PRIME(MODIFIER||921||5517|kis|protein_coding|CODING|FBtr0299837|17|1);UTR_3_PRIME(MODIFIER||921||2151|kis|protein_coding|CODING|FBtr0078145|7|1);UTR_3_PRIME(MODIFIER||921||5322|kis|protein_coding|CODING|FBtr0078144|18|1);UTR_3_PRIME(MODIFIER||921||5191|kis|protein_coding|CODING|FBtr0308255|17|1);U…	Free Glucose	0.09514	0.5645	0.264585
Free Glucose	glucose	48152	0.57467	0.0001	FBgn0031910	2L:7410909-7412229	-0.49777	0.0013	2L_2602871_SNP	0.4054	8.30983e-06	9.386e-06	0.00555556	SiteClass[|||],TranscriptAnnot[INTERGENIC(MODIFIER||||||||||1)]	Free Glucose	-0.18704	0.2542	0.102215
Free Glucose	glucose	48152	0.57467	0.0001	FBgn0043791	3R:5320523-5322445	0.51437	0.0008	2L_2602871_SNP	0.4054	8.30983e-06	0.002761	0.00555556	SiteClass[|||],TranscriptAnnot[INTERGENIC(MODIFIER||||||||||1)]	Free Glucose	0.14717	0.3713	0.102215
Free Glucose	glucose	48152	0.57467	0.0001	FBgn0036428	3L:14534037-14544075	0.62186	<.0001	2L_2602871_SNP	0.4054	8.30983e-06	0.0007924	0.00555556	SiteClass[|||],TranscriptAnnot[INTERGENIC(MODIFIER||||||||||1)]	Free Glucose	0.3917	0.0137	0.102215
Free Glucose	glucose	48152	0.57467	0.0001	FBgn0033880	2R:9742083-9743283	-0.46053	0.0032	2L_2602871_SNP	0.4054	8.30983e-06	0.0003217	0.00555556	SiteClass[|||],TranscriptAnnot[INTERGENIC(MODIFIER||||||||||1)]	Free Glucose	0.01093	0.9473	0.102215
Free Glucose	glucose	48152	0.57467	0.0001	FBgn0000536	X:16172361-16179651	-0.53259	0.0005	2L_2602871_SNP	0.4054	8.30983e-06	0.000658	0.00555556	SiteClass[|||],TranscriptAnnot[INTERGENIC(MODIFIER||||||||||1)]	Free Glucose	-0.36498	0.0223	0.102215
Free Glucose	glucose	48152	0.57467	0.0001	FBgn0028949	2L:15613905-15614828	0.56032	0.0002	2L_2602871_SNP	0.4054	8.30983e-06	0.002284	0.00555556	SiteClass[|||],TranscriptAnnot[INTERGENIC(MODIFIER||||||||||1)]	Free Glucose	0.09534	0.5637	0.102215
Free Glucose	glucose	48152	0.57467	0.0001	FBgn0260388	3L:16484938-16489336	0.46215	0.0031	2L_2602871_SNP	0.4054	8.30983e-06	8.406e-05	0.00555556	SiteClass[|||],TranscriptAnnot[INTERGENIC(MODIFIER||||||||||1)]	Free Glucose	-0.03482	0.8333	0.102215
Free Glucose	propionylcarnitine	32452	-0.34747	0.028	XLOC_016571	3L:7252064-7253515	0.49231	0.0015	2L_4004555_SNP	0.1795	1.66585e-06	2.517e-05	0.0015625	SiteClass[FBgn0085205|CG34176|DOWNSTREAM|75;FBgn0031579|CG15422|UPSTREAM|429],TranscriptAnnot[UPSTREAM(MODIFIER||429||104|CG15422|protein_coding|CODING|FBtr0077505||1);DOWNSTREAM(MODIFIER||75||83|CG34176|protein_coding|CODING|FBtr0112367||1);INTERGENIC(MODIFIER||||||||||1)]	Free Glucose	-0.06579	0.6907	0.0220494
Free Glucose	propionylcarnitine	32452	-0.34747	0.028	FBgn0017448	3R:27581078-27584359	0.45486	0.0036	2L_4004555_SNP	0.1795	1.66585e-06	0.0001465	0.0015625	SiteClass[FBgn0085205|CG34176|DOWNSTREAM|75;FBgn0031579|CG15422|UPSTREAM|429],TranscriptAnnot[UPSTREAM(MODIFIER||429||104|CG15422|protein_coding|CODING|FBtr0077505||1);DOWNSTREAM(MODIFIER||75||83|CG34176|protein_coding|CODING|FBtr0112367||1);INTERGENIC(MODIFIER||||||||||1)]	Free Glucose	-0.27551	0.0896	0.0220494
Free Glucose	propionylcarnitine	32452	-0.34747	0.028	FBgn0036428	3L:14534037-14544075	-0.52126	0.0007	2L_4004555_SNP	0.1795	1.66585e-06	0.001472	0.0015625	SiteClass[FBgn0085205|CG34176|DOWNSTREAM|75;FBgn0031579|CG15422|UPSTREAM|429],TranscriptAnnot[UPSTREAM(MODIFIER||429||104|CG15422|protein_coding|CODING|FBtr0077505||1);DOWNSTREAM(MODIFIER||75||83|CG34176|protein_coding|CODING|FBtr0112367||1);INTERGENIC(MODIFIER||||||||||1)]	Free Glucose	0.3917	0.0137	0.0220494
Free Glucose	propionylcarnitine	32452	-0.34747	0.028	FBgn0037481	3R:2979960-2980902	-0.48603	0.0017	2L_4004555_SNP	0.1795	1.66585e-06	0.001109	0.0015625	SiteClass[FBgn0085205|CG34176|DOWNSTREAM|75;FBgn0031579|CG15422|UPSTREAM|429],TranscriptAnnot[UPSTREAM(MODIFIER||429||104|CG15422|protein_coding|CODING|FBtr0077505||1);DOWNSTREAM(MODIFIER||75||83|CG34176|protein_coding|CODING|FBtr0112367||1);INTERGENIC(MODIFIER||||||||||1)]	Free Glucose	-0.01154	0.9444	0.0220494
Free Glucose	propionylcarnitine	32452	-0.34747	0.028	FBgn0039025	3R:18576623-18602096	-0.49291	0.0014	2L_4004555_SNP	0.1795	1.66585e-06	0.000632	0.0015625	SiteClass[FBgn0085205|CG34176|DOWNSTREAM|75;FBgn0031579|CG15422|UPSTREAM|429],TranscriptAnnot[UPSTREAM(MODIFIER||429||104|CG15422|protein_coding|CODING|FBtr0077505||1);DOWNSTREAM(MODIFIER||75||83|CG34176|protein_coding|CODING|FBtr0112367||1);INTERGENIC(MODIFIER||||||||||1)]	Free Glucose	0.00628	0.9698	0.0220494
Free Glucose	3-hydroxypropanoate	1556	-0.34071	0.0314	FBgn0051272	3R:6582018-6585120	-0.51599	0.0008	2L_4140092_SNP	0.2703	4.06426e-06	1.362e-05	0.000431034	SiteClass[|||],TranscriptAnnot[INTERGENIC(MODIFIER||||||||||1)]	Free Glucose	0.23016	0.1587	0.47452
Free Glucose	3-hydroxypropanoate	1556	-0.34071	0.0314	XLOC_017549	3L:14449887-14461584	-0.45992	0.0032	2L_4140092_SNP	0.2703	4.06426e-06	0.0002617	0.000431034	SiteClass[|||],TranscriptAnnot[INTERGENIC(MODIFIER||||||||||1)]	Free Glucose	-0.00729	0.9649	0.47452
Free Glucose	3-hydroxypropanoate	1556	-0.34071	0.0314	FBgn0037759	3R:5627002-5629183	0.4913	0.0015	2L_4140092_SNP	0.2703	4.06426e-06	4.241e-05	0.000431034	SiteClass[|||],TranscriptAnnot[INTERGENIC(MODIFIER||||||||||1)]	Free Glucose	-0.083	0.6154	0.47452
Free Glucose	3-hydroxypropanoate	1556	-0.34071	0.0314	FBgn0033913	2R:10107403-10118125	-0.4915	0.0015	2L_4141333_SNP	0.1282	2.21459e-06	3.429e-05	0.000431034	SiteClass[|||],TranscriptAnnot[INTERGENIC(MODIFIER||||||||||1)]	Free Glucose	-0.04332	0.7934	0.113699
Free Glucose	3-hydroxypropanoate	1556	-0.34071	0.0314	FBgn0040260	2L:16799025-16801584	-0.46235	0.003	2L_4141333_SNP	0.1282	2.21459e-06	7.402e-05	0.000431034	SiteClass[|||],TranscriptAnnot[INTERGENIC(MODIFIER||||||||||1)]	Free Glucose	0.37834	0.0176	0.113699
Free Glucose	3-hydroxypropanoate	1556	-0.34071	0.0314	FBgn0033913	2R:10107403-10118125	-0.4915	0.0015	2L_4142228_SNP	0.1795	5.2425e-06	6.205e-05	0.000431034	SiteClass[|||],TranscriptAnnot[INTERGENIC(MODIFIER||||||||||1)]	Free Glucose	-0.04332	0.7934	0.129309
Free Glucose	3-hydroxypropanoate	1556	-0.34071	0.0314	FBgn0051272	3R:6582018-6585120	-0.51599	0.0008	2L_4142228_SNP	0.1795	5.2425e-06	0.0002129	0.000431034	SiteClass[|||],TranscriptAnnot[INTERGENIC(MODIFIER||||||||||1)]	Free Glucose	0.23016	0.1587	0.129309
Free Glucose	3-hydroxypropanoate	1556	-0.34071	0.0314	FBgn0031821	2L:6487342-6488756	-0.61113	<.0001	2L_4142228_SNP	0.1795	5.2425e-06	0.0002059	0.000431034	SiteClass[|||],TranscriptAnnot[INTERGENIC(MODIFIER||||||||||1)]	Free Glucose	0.03239	0.8448	0.129309
Free Glucose	3-hydroxypropanoate	1556	-0.34071	0.0314	FBgn0040260	2L:16799025-16801584	-0.46235	0.003	2L_4142228_SNP	0.1795	5.2425e-06	5.626e-07	0.000431034	SiteClass[|||],TranscriptAnnot[INTERGENIC(MODIFIER||||||||||1)]	Free Glucose	0.37834	0.0176	0.129309
Free Glucose	3-hydroxypropanoate	1556	-0.34071	0.0314	FBgn0033913	2R:10107403-10118125	-0.4915	0.0015	2L_4143216_SNP	0.1579	1.08933e-06	3.421e-05	0.000431034	SiteClass[|||],TranscriptAnnot[INTERGENIC(MODIFIER||||||||||1)]	Free Glucose	-0.04332	0.7934	0.0761187
Free Glucose	3-hydroxypropanoate	1556	-0.34071	0.0314	FBgn0040260	2L:16799025-16801584	-0.46235	0.003	2L_4143216_SNP	0.1579	1.08933e-06	1.075e-06	0.000431034	SiteClass[|||],TranscriptAnnot[INTERGENIC(MODIFIER||||||||||1)]	Free Glucose	0.37834	0.0176	0.0761187
Free Glucose	3-hydroxypropanoate	1556	-0.34071	0.0314	FBgn0031821	2L:6487342-6488756	-0.61113	<.0001	2L_4143216_SNP	0.1579	1.08933e-06	0.0002214	0.000431034	SiteClass[|||],TranscriptAnnot[INTERGENIC(MODIFIER||||||||||1)]	Free Glucose	0.03239	0.8448	0.0761187
Free Glucose	histamine	1574	-0.36831	0.0194	FBgn0039326	3R:21146775-21148479	-0.47634	0.0022	2L_4268103_SNP	0.1282	3.81848e-06	0.00155	0.00172414	SiteClass[|||],TranscriptAnnot[INTERGENIC(MODIFIER||||||||||1)]	Free Glucose	0.42814	0.0065	0.324393
Free Glucose	histamine	1574	-0.36831	0.0194	FBgn0031150	X:20924990-20953418	-0.50013	0.0012	2L_4268103_SNP	0.1282	3.81848e-06	0.00167	0.00172414	SiteClass[|||],TranscriptAnnot[INTERGENIC(MODIFIER||||||||||1)]	Free Glucose	0.17166	0.2961	0.324393
Free Glucose	histamine	1574	-0.36831	0.0194	XLOC_017830	3L:15931447-15935182	0.49162	0.0015	2L_4268103_SNP	0.1282	3.81848e-06	0.001691	0.00172414	SiteClass[|||],TranscriptAnnot[INTERGENIC(MODIFIER||||||||||1)]	Free Glucose	-0.12611	0.4443	0.324393
Free Glucose	histamine	1574	-0.36831	0.0194	FBgn0039326	3R:21146775-21148479	-0.47634	0.0022	2L_4268105_SNP	0.125	6.70411e-06	0.001297	0.00172414	SiteClass[|||],TranscriptAnnot[INTERGENIC(MODIFIER||||||||||1)]	Free Glucose	0.42814	0.0065	0.336516
Free Glucose	histamine	1574	-0.36831	0.0194	XLOC_017830	3L:15931447-15935182	0.49162	0.0015	2L_4268105_SNP	0.125	6.70411e-06	0.001367	0.00172414	SiteClass[|||],TranscriptAnnot[INTERGENIC(MODIFIER||||||||||1)]	Free Glucose	-0.12611	0.4443	0.336516
Free Glucose	1-methylurate	34395	-0.39231	0.0123	FBgn0051950	2L:2878344-2879001	0.47065	0.0025	2L_5743742_SNP	0.1282	6.33537e-06	0.0003008	0.000420168	SiteClass[FBgn0031736|CG11030|INTRON|0],TranscriptAnnot[INTRON(MODIFIER||||332|CG11030|protein_coding|CODING|FBtr0079135|1|1);INTRON(MODIFIER||||332|CG11030|protein_coding|CODING|FBtr0332554|1|1)]	Free Glucose	-0.37085	0.0201	0.555243
Free Glucose	1-methylurate	34395	-0.39231	0.0123	FBgn0051950	2L:2878344-2879001	0.47065	0.0025	2L_5749461_SNP	0.125	7.57401e-06	0.0002461	0.000420168	SiteClass[FBgn0031736|CG11030|INTRON|0],TranscriptAnnot[INTRON(MODIFIER||||332|CG11030|protein_coding|CODING|FBtr0079135|1|1);INTRON(MODIFIER||||332|CG11030|protein_coding|CODING|FBtr0332554|1|1)]	Free Glucose	-0.37085	0.0201	0.623726
Free Glucose	cystathionine	15705	-0.39418	0.0118	XLOC_004820	2L:13516977-13522116	0.49251	0.0014	2L_6309098_SNP	0.125	2.34343e-07	0.00305	0.00454545	SiteClass[FBgn0053531|Ddr|INTRON|0;FBgn0260452|CG13984|NON_SYNONYMOUS_CODING|0;FBgn0264543|CG43922|UPSTREAM|347],TranscriptAnnot[NON_SYNONYMOUS_CODING(MODERATE|MISSENSE|Ggg/Agg|G78R|100|CG13984|protein_coding|CODING|FBtr0079247|1|1);UPSTREAM(MODIFIER||347||81|CG43922|protein_coding|CODING|FBtr0333243||1);INTRON(MODIFIER||||1054|Ddr|protein_coding|CODING|FBtr0344770|14|1);INTRON(MODIFIER||||1054|D…	Free Glucose	-0.03603	0.8276	0.00894545
Free Glucose	panose	37284	0.39606	0.0114	FBgn0044047	X:2225526-2228691	0.54555	0.0003	2L_6374275_SNP	0.1282	4.99039e-06	0.0007559	0.00138889	SiteClass[FBgn0043854|slam|SYNONYMOUS_CODING|0],TranscriptAnnot[SYNONYMOUS_CODING(LOW|SILENT|gcA/gcC|A233|1173|slam|protein_coding|CODING|FBtr0290281|2|1);SYNONYMOUS_CODING(LOW|SILENT|gcA/gcC|A233|1173|slam|protein_coding|CODING|FBtr0344864|1|1)]	Free Glucose	0.36417	0.0227	0.669686
Free Glucose	3-hydroxypropanoate	1556	-0.34071	0.0314	FBgn0033913	2R:10107403-10118125	-0.4915	0.0015	2L_6760163_SNP	0.125	2.23691e-06	0.000317	0.000431034	SiteClass[FBgn0031857|CG11321|UTR_3_PRIME|0;FBgn0031856|CG11322|UPSTREAM|535],TranscriptAnnot[UTR_3_PRIME(MODIFIER||27||2851|CG11321|protein_coding|CODING|FBtr0331218|17|1);UTR_3_PRIME(MODIFIER||27||2892|CG11321|protein_coding|CODING|FBtr0331216|17|1);UTR_3_PRIME(MODIFIER||27||2839|CG11321|protein_coding|CODING|FBtr0331220|17|1);UTR_3_PRIME(MODIFIER||27||2798|CG11321|protein_coding|CODING|FBtr033…	Free Glucose	-0.04332	0.7934	0.268176
Free Glucose	3-hydroxypropanoate	1556	-0.34071	0.0314	FBgn0033913	2R:10107403-10118125	-0.4915	0.0015	2L_6763364_SNP	0.15	4.74769e-06	0.0001225	0.000431034	SiteClass[FBgn0031857|CG11321|SYNONYMOUS_CODING|0],TranscriptAnnot[SYNONYMOUS_CODING(LOW|SILENT|ttC/ttT|F1999|2851|CG11321|protein_coding|CODING|FBtr0331218|12|1);SYNONYMOUS_CODING(LOW|SILENT|ttC/ttT|F2040|2892|CG11321|protein_coding|CODING|FBtr0331216|12|1);SYNONYMOUS_CODING(LOW|SILENT|ttC/ttT|F1987|2839|CG11321|protein_coding|CODING|FBtr0331220|12|1);SYNONYMOUS_CODING(LOW|SILENT|ttC/ttT|F1946|2…	Free Glucose	-0.04332	0.7934	0.325793
Free Glucose	3-hydroxypropanoate	1556	-0.34071	0.0314	FBgn0034963	2R:19924243-19925438	0.45587	0.0035	2L_6848388_DEL	0.2353	6.38937e-06	0.0002625	0.000431034	SiteClass[|||],TranscriptAnnot[INTERGENIC(MODIFIER||||||||||1)]	Free Glucose	-0.20445	0.2118	0.468449
Free Glucose	3-hydroxypropanoate	1556	-0.34071	0.0314	FBgn0031947	2L:7782865-7786061	0.47773	0.0021	2L_6848388_DEL	0.2353	6.38937e-06	0.0003593	0.000431034	SiteClass[|||],TranscriptAnnot[INTERGENIC(MODIFIER||||||||||1)]	Free Glucose	-0.12308	0.4554	0.468449
Free Glucose	1-methylurate	34395	-0.39231	0.0123	FBgn0063493	2R:14294429-14295193	-0.5081	0.001	2L_7078922_SNP	0.1667	3.12536e-06	0.0001284	0.000420168	SiteClass[FBgn0265822|CR44611|EXON|0;FBgn0031888|Pvf2|INTRON|0],TranscriptAnnot[INTRON(MODIFIER||||405|Pvf2|protein_coding|CODING|FBtr0079423|2|1);EXON(MODIFIER|||||CR44611|ncRNA|NON_CODING|FBtr0342659|1|1)]	Free Glucose	0.25951	0.1106	0.613003
Free Glucose	histamine	1574	-0.36831	0.0194	FBgn0034725	2R:18291682-18296045	-0.45832	0.0033	2L_718033_SNP	0.15	7.66694e-06	4.732e-05	0.00172414	SiteClass[|||],TranscriptAnnot[INTERGENIC(MODIFIER||||||||||1)]	Free Glucose	-0.21296	0.193	0.00601808
Free Glucose	histamine	1574	-0.36831	0.0194	XLOC_017830	3L:15931447-15935182	0.49162	0.0015	2L_718033_SNP	0.15	7.66694e-06	0.001376	0.00172414	SiteClass[|||],TranscriptAnnot[INTERGENIC(MODIFIER||||||||||1)]	Free Glucose	-0.12611	0.4443	0.00601808
Free Glucose	1-palmitoleoyl-2-oleoyl-glycerol (16:1/18:1)*	52632	0.32645	0.0398	FBgn0050054	2R:8511231-8512857	-0.45769	0.0034	2L_7431288_SNP	0.475	6.70128e-06	0.001033	0.00121951	SiteClass[FBgn0031913|CG5958|SYNONYMOUS_CODING|0;FBgn0031912|CG5261|DOWNSTREAM|959],TranscriptAnnot[SYNONYMOUS_CODING(LOW|SILENT|Cgg/Agg|R165|294|CG5958|protein_coding|CODING|FBtr0079466|3|1);DOWNSTREAM(MODIFIER||959||512|CG5261|protein_coding|CODING|FBtr0079444||1);DOWNSTREAM(MODIFIER||959||421|CG5261|protein_coding|CODING|FBtr0079445||1);DOWNSTREAM(MODIFIER||959||473|CG5261|protein_coding|CODIN…	Free Glucose	0.1085	0.5109	0.143632
Free Glucose	histamine	1574	-0.36831	0.0194	FBgn0031150	X:20924990-20953418	-0.50013	0.0012	2L_7434853_SNP	0.1026	2.66369e-06	0.0004391	0.00172414	SiteClass[|||],TranscriptAnnot[INTERGENIC(MODIFIER||||||||||1)]	Free Glucose	0.17166	0.2961	0.698415
Free Glucose	1-stearoyl-2-linoleoyl-GPE (18:0/18:2)*	52446	-0.32458	0.041	FBgn0051777	2L:3706551-3707063	0.46154	0.0031	2L_7784868_SNP	0.4615	1.58801e-06	0.0002209	0.000961538	SiteClass[FBgn0031947|CG7154|SYNONYMOUS_CODING|0],TranscriptAnnot[SYNONYMOUS_CODING(LOW|SILENT|aaA/aaG|K525|861|CG7154|protein_coding|CODING|FBtr0079488|3|1)]	Free Glucose	-0.13016	0.4297	0.040918
Free Glucose	1-stearoyl-2-linoleoyl-GPE (18:0/18:2)*	52446	-0.32458	0.041	FBgn0051759	2L:12207709-12210110	-0.45364	0.0037	2L_7784868_SNP	0.4615	1.58801e-06	0.0001447	0.000961538	SiteClass[FBgn0031947|CG7154|SYNONYMOUS_CODING|0],TranscriptAnnot[SYNONYMOUS_CODING(LOW|SILENT|aaA/aaG|K525|861|CG7154|protein_coding|CODING|FBtr0079488|3|1)]	Free Glucose	-0.15891	0.3339	0.040918
Free Glucose	1-stearoyl-2-linoleoyl-GPE (18:0/18:2)*	52446	-0.32458	0.041	FBgn0260006	X:15019786-15031344	0.47267	0.0024	2L_7784868_SNP	0.4615	1.58801e-06	0.0002601	0.000961538	SiteClass[FBgn0031947|CG7154|SYNONYMOUS_CODING|0],TranscriptAnnot[SYNONYMOUS_CODING(LOW|SILENT|aaA/aaG|K525|861|CG7154|protein_coding|CODING|FBtr0079488|3|1)]	Free Glucose	0.03988	0.8095	0.040918
Free Glucose	1-stearoyl-2-linoleoyl-GPE (18:0/18:2)*	52446	-0.32458	0.041	FBgn0036668	3L:16838486-16845450	-0.48482	0.0018	2L_7784868_SNP	0.4615	1.58801e-06	0.0009314	0.000961538	SiteClass[FBgn0031947|CG7154|SYNONYMOUS_CODING|0],TranscriptAnnot[SYNONYMOUS_CODING(LOW|SILENT|aaA/aaG|K525|861|CG7154|protein_coding|CODING|FBtr0079488|3|1)]	Free Glucose	-0.03846	0.8162	0.040918
Free Glucose	1-stearoyl-2-linoleoyl-GPE (18:0/18:2)*	52446	-0.32458	0.041	FBgn0038135	3R:9120470-9124010	0.5585	0.0002	2L_7784868_SNP	0.4615	1.58801e-06	0.0003317	0.000961538	SiteClass[FBgn0031947|CG7154|SYNONYMOUS_CODING|0],TranscriptAnnot[SYNONYMOUS_CODING(LOW|SILENT|aaA/aaG|K525|861|CG7154|protein_coding|CODING|FBtr0079488|3|1)]	Free Glucose	-0.01134	0.9454	0.040918
Free Glucose	1-stearoyl-2-linoleoyl-GPE (18:0/18:2)*	52446	-0.32458	0.041	FBgn0050265	2R:18719979-18722103	0.46498	0.0029	2L_7784868_SNP	0.4615	1.58801e-06	0.0003283	0.000961538	SiteClass[FBgn0031947|CG7154|SYNONYMOUS_CODING|0],TranscriptAnnot[SYNONYMOUS_CODING(LOW|SILENT|aaA/aaG|K525|861|CG7154|protein_coding|CODING|FBtr0079488|3|1)]	Free Glucose	-0.0166	0.9201	0.040918
Free Glucose	1-stearoyl-2-linoleoyl-GPE (18:0/18:2)*	52446	-0.32458	0.041	FBgn0259101	X:10990306-11002181	0.48482	0.0018	2L_7784868_SNP	0.4615	1.58801e-06	0.0003451	0.000961538	SiteClass[FBgn0031947|CG7154|SYNONYMOUS_CODING|0],TranscriptAnnot[SYNONYMOUS_CODING(LOW|SILENT|aaA/aaG|K525|861|CG7154|protein_coding|CODING|FBtr0079488|3|1)]	Free Glucose	-0.19312	0.2388	0.040918
Free Glucose	maltopentaose	35163	0.38668	0.0137	FBgn0034642	2R:17519512-17521867	-0.46538	0.0028	2L_7931762_INS	0.2353	3.21602e-06	0.001508	0.0015625	SiteClass[FBgn0085450|Snoo|INTRON|0],TranscriptAnnot[INTRON(MODIFIER||||1223|Snoo|protein_coding|CODING|FBtr0112717|1|1);INTRON(MODIFIER||||1223|Snoo|protein_coding|CODING|FBtr0112718|2|1);INTRON(MODIFIER||||1223|Snoo|protein_coding|CODING|FBtr0112719|2|1);INTRON(MODIFIER||||1223|Snoo|protein_coding|CODING|FBtr0343409|1|1)]	Free Glucose	-0.24939	0.1257	0.165933
Free Glucose	sucrose	1519	-0.41895	0.0071	FBgn0030524	X:13684371-13685144	0.50142	0.0011	2L_8353313_SNP	0.225	2.78538e-06	0.001412	0.00208333	SiteClass[FBgn0051901|Mur29B|INTRON|0],TranscriptAnnot[INTRON(MODIFIER||||555|Mur29B|protein_coding|CODING|FBtr0079607|1|1)]	Free Glucose	-0.36336	0.023	0.0548959
Free Glucose	sucrose	1519	-0.41895	0.0071	FBgn0038363	3R:11618410-11619209	-0.45587	0.0035	2L_8353313_SNP	0.225	2.78538e-06	0.0013	0.00208333	SiteClass[FBgn0051901|Mur29B|INTRON|0],TranscriptAnnot[INTRON(MODIFIER||||555|Mur29B|protein_coding|CODING|FBtr0079607|1|1)]	Free Glucose	-0.3502	0.0288	0.0548959
Free Glucose	glycerol 3-phosphate	43847	0.38386	0.0145	FBgn0032222	2L:10331471-10333129	0.48745	0.0016	2L_8900093_SNP	0.1667	4.77428e-06	5.167e-05	0.000235849	SiteClass[FBgn0085427|CG34398|INTRON|0],TranscriptAnnot[INTRON(MODIFIER||||1930|CG34398|protein_coding|CODING|FBtr0303892|1|1);INTRON(MODIFIER||||1500|CG34398|protein_coding|CODING|FBtr0340259|1|1);INTRON(MODIFIER||||1784|CG34398|protein_coding|CODING|FBtr0112649|1|1);INTRON(MODIFIER||||1611|CG34398|protein_coding|CODING|FBtr0303891|1|1);INTRON(MODIFIER||||1673|CG34398|protein_coding|CODING|FBtr0…	Free Glucose	0.0415	0.8019	0.777915
Free Glucose	glycerol 3-phosphate	43847	0.38386	0.0145	FBgn0032222	2L:10331471-10333129	0.48745	0.0016	2L_8902211_SNP	0.1351	3.50977e-07	3.688e-05	0.000235849	SiteClass[FBgn0085427|CG34398|INTRON|0],TranscriptAnnot[INTRON(MODIFIER||||1930|CG34398|protein_coding|CODING|FBtr0303892|1|1);INTRON(MODIFIER||||1500|CG34398|protein_coding|CODING|FBtr0340259|1|1);INTRON(MODIFIER||||1784|CG34398|protein_coding|CODING|FBtr0112649|1|1);INTRON(MODIFIER||||1611|CG34398|protein_coding|CODING|FBtr0303891|1|1);INTRON(MODIFIER||||1673|CG34398|protein_coding|CODING|FBtr0…	Free Glucose	0.0415	0.8019	0.557802
Free Glucose	glycerol 3-phosphate	43847	0.38386	0.0145	FBgn0032222	2L:10331471-10333129	0.48745	0.0016	2L_8912423_SNP	0.1111	3.79076e-09	5.676e-05	0.000235849	SiteClass[FBgn0085427|CG34398|INTRON|0],TranscriptAnnot[INTRON(MODIFIER||||1930|CG34398|protein_coding|CODING|FBtr0303892|1|1);INTRON(MODIFIER||||1500|CG34398|protein_coding|CODING|FBtr0340259|1|1);INTRON(MODIFIER||||1784|CG34398|protein_coding|CODING|FBtr0112649|1|1);INTRON(MODIFIER||||1611|CG34398|protein_coding|CODING|FBtr0303891|1|1);INTRON(MODIFIER||||1673|CG34398|protein_coding|CODING|FBtr0…	Free Glucose	0.0415	0.8019	0.166379
Free Glucose	glycerol 3-phosphate	43847	0.38386	0.0145	FBgn0032222	2L:10331471-10333129	0.48745	0.0016	2L_8912424_SNP	0.1081	4.68813e-09	5.828e-05	0.000235849	SiteClass[FBgn0085427|CG34398|INTRON|0],TranscriptAnnot[INTRON(MODIFIER||||1930|CG34398|protein_coding|CODING|FBtr0303892|1|1);INTRON(MODIFIER||||1500|CG34398|protein_coding|CODING|FBtr0340259|1|1);INTRON(MODIFIER||||1784|CG34398|protein_coding|CODING|FBtr0112649|1|1);INTRON(MODIFIER||||1611|CG34398|protein_coding|CODING|FBtr0303891|1|1);INTRON(MODIFIER||||1673|CG34398|protein_coding|CODING|FBtr0…	Free Glucose	0.0415	0.8019	0.177409
Free Glucose	glycerol 3-phosphate	43847	0.38386	0.0145	FBgn0032222	2L:10331471-10333129	0.48745	0.0016	2L_8918494_SNP	0.1316	4.02726e-06	0.0001301	0.000235849	SiteClass[FBgn0085427|CG34398|INTRON|0],TranscriptAnnot[INTRON(MODIFIER||||1930|CG34398|protein_coding|CODING|FBtr0112648|2|1);INTRON(MODIFIER||||1784|CG34398|protein_coding|CODING|FBtr0112649|2|1);INTRON(MODIFIER||||1784|CG34398|protein_coding|CODING|FBtr0303889|2|1);INTRON(MODIFIER||||1784|CG34398|protein_coding|CODING|FBtr0303890|2|1);INTRON(MODIFIER||||1930|CG34398|protein_coding|CODING|FBtr0…	Free Glucose	0.0415	0.8019	0.555702
Free Glucose	glycerol 3-phosphate	43847	0.38386	0.0145	FBgn0032222	2L:10331471-10333129	0.48745	0.0016	2L_8918550_SNP	0.1212	3.60501e-09	0.0001086	0.000235849	SiteClass[FBgn0085427|CG34398|INTRON|0],TranscriptAnnot[INTRON(MODIFIER||||1930|CG34398|protein_coding|CODING|FBtr0112648|2|1);INTRON(MODIFIER||||1784|CG34398|protein_coding|CODING|FBtr0112649|2|1);INTRON(MODIFIER||||1784|CG34398|protein_coding|CODING|FBtr0303889|2|1);INTRON(MODIFIER||||1784|CG34398|protein_coding|CODING|FBtr0303890|2|1);INTRON(MODIFIER||||1930|CG34398|protein_coding|CODING|FBtr0…	Free Glucose	0.0415	0.8019	0.169833
Free Glucose	glycerol 3-phosphate	43847	0.38386	0.0145	FBgn0032222	2L:10331471-10333129	0.48745	0.0016	2L_9162260_SNP	0.175	3.57017e-07	0.0001401	0.000235849	SiteClass[FBgn0052982|CG32982|SYNONYMOUS_CODING|0],TranscriptAnnot[SYNONYMOUS_CODING(LOW|SILENT|aaT/aaC|N533|720|CG32982|protein_coding|CODING|FBtr0330218|7|1);SYNONYMOUS_CODING(LOW|SILENT|aaT/aaC|N548|730|CG32982|protein_coding|CODING|FBtr0303888|8|1);SYNONYMOUS_CODING(LOW|SILENT|aaT/aaC|N533|715|CG32982|protein_coding|CODING|FBtr0079771|7|1);SYNONYMOUS_CODING(LOW|SILENT|aaT/aaC|N637|793|CG32982…	Free Glucose	0.0415	0.8019	0.102408
Free Glucose	histamine	1574	-0.36831	0.0194	XLOC_017830	3L:15931447-15935182	0.49162	0.0015	2L_940747_SNP	0.2051	7.84797e-06	0.000553	0.00172414	SiteClass[FBgn0028481|CG4341|INTRON|0],TranscriptAnnot[INTRON(MODIFIER||||908|CG4341|protein_coding|CODING|FBtr0305064|1|1);INTRON(MODIFIER||||938|CG4341|protein_coding|CODING|FBtr0077949|2|1)]	Free Glucose	-0.12611	0.4443	0.205971
Free Glucose	histamine	1574	-0.36831	0.0194	FBgn0034725	2R:18291682-18296045	-0.45832	0.0033	2L_940747_SNP	0.2051	7.84797e-06	0.0001638	0.00172414	SiteClass[FBgn0028481|CG4341|INTRON|0],TranscriptAnnot[INTRON(MODIFIER||||908|CG4341|protein_coding|CODING|FBtr0305064|1|1);INTRON(MODIFIER||||938|CG4341|protein_coding|CODING|FBtr0077949|2|1)]	Free Glucose	-0.21296	0.193	0.205971
Free Glucose	1-stearoyl-2-linoleoyl-GPE (18:0/18:2)*	52446	-0.32458	0.041	FBgn0050265	2R:18719979-18722103	0.46498	0.0029	2L_9489249_DEL	0.1316	7.79283e-06	0.0005831	0.000961538	SiteClass[|||],TranscriptAnnot[INTERGENIC(MODIFIER||||||||||1)]	Free Glucose	-0.0166	0.9201	0.421057
Free Glucose	histamine	1574	-0.36831	0.0194	XLOC_011951	2RHet:1308120-1309834	0.52179	0.0007	2R_10314608_SNP	0.1282	7.36801e-06	0.0006066	0.00172414	SiteClass[FBgn0013725|phyl|DOWNSTREAM|233],TranscriptAnnot[DOWNSTREAM(MODIFIER||233||400|phyl|protein_coding|CODING|FBtr0087516||1);INTERGENIC(MODIFIER||||||||||1)]	Free Glucose	-0.08664	0.6	0.940586
Free Glucose	histamine	1574	-0.36831	0.0194	FBgn0031150	X:20924990-20953418	-0.50013	0.0012	2R_10314608_SNP	0.1282	7.36801e-06	0.000837	0.00172414	SiteClass[FBgn0013725|phyl|DOWNSTREAM|233],TranscriptAnnot[DOWNSTREAM(MODIFIER||233||400|phyl|protein_coding|CODING|FBtr0087516||1);INTERGENIC(MODIFIER||||||||||1)]	Free Glucose	0.17166	0.2961	0.940586
Free Glucose	sucrose	1519	-0.41895	0.0071	FBgn0023000	3L:343378-346957	-0.49271	0.0014	2R_10483689_SNP	0.1538	3.47124e-06	0.0004412	0.00208333	SiteClass[FBgn0019938|RpI1|SYNONYMOUS_CODING|0;FBgn0033943|CG12869|DOWNSTREAM|567],TranscriptAnnot[SYNONYMOUS_CODING(LOW|SILENT|atA/atT|I1469|1642|RpI1|protein_coding|CODING|FBtr0087511|10|1);DOWNSTREAM(MODIFIER||567||685|CG12869|protein_coding|CODING|FBtr0087496||1);DOWNSTREAM(MODIFIER||567||685|CG12869|protein_coding|CODING|FBtr0339977||1);DOWNSTREAM(MODIFIER||567||685|CG12869|protein_coding|CO…	Free Glucose	0.11377	0.4905	0.030626
Free Glucose	1-stearoyl-2-linoleoyl-GPE (18:0/18:2)*	52446	-0.32458	0.041	FBgn0263748	X:15673179-15674247	0.48239	0.0019	2R_11473864_DEL	0.4474	6.63524e-07	0.000228	0.000961538	SiteClass[|||],TranscriptAnnot[INTERGENIC(MODIFIER||||||||||1)]	Free Glucose	-0.28806	0.0754	0.42441
Free Glucose	1-stearoyl-2-linoleoyl-GPE (18:0/18:2)*	52446	-0.32458	0.041	FBgn0029712	X:4443103-4443990	0.53684	0.0004	2R_11473864_DEL	0.4474	6.63524e-07	0.0001848	0.000961538	SiteClass[|||],TranscriptAnnot[INTERGENIC(MODIFIER||||||||||1)]	Free Glucose	0.07733	0.6399	0.42441
Free Glucose	1-stearoyl-2-linoleoyl-GPE (18:0/18:2)*	52446	-0.32458	0.041	FBgn0036030	3L:9676679-9689800	-0.53765	0.0004	2R_11473864_DEL	0.4474	6.63524e-07	4.632e-05	0.000961538	SiteClass[|||],TranscriptAnnot[INTERGENIC(MODIFIER||||||||||1)]	Free Glucose	0.31822	0.0484	0.42441
Free Glucose	1-stearoyl-2-linoleoyl-GPE (18:0/18:2)*	52446	-0.32458	0.041	XLOC_006819	2R:4758529-4759724	0.48158	0.0019	2R_11473864_DEL	0.4474	6.63524e-07	0.0005566	0.000961538	SiteClass[|||],TranscriptAnnot[INTERGENIC(MODIFIER||||||||||1)]	Free Glucose	-0.02328	0.8881	0.42441
Free Glucose	1-stearoyl-2-linoleoyl-GPE (18:0/18:2)*	52446	-0.32458	0.041	FBgn0011674	2R:16708767-16723533	-0.48664	0.0017	2R_11473864_DEL	0.4474	6.63524e-07	0.0001169	0.000961538	SiteClass[|||],TranscriptAnnot[INTERGENIC(MODIFIER||||||||||1)]	Free Glucose	0.06457	0.6961	0.42441
Free Glucose	1-stearoyl-2-linoleoyl-GPE (18:0/18:2)*	52446	-0.32458	0.041	FBgn0263412	3R:26958052-26958772	0.59494	<.0001	2R_11473864_DEL	0.4474	6.63524e-07	9.299e-05	0.000961538	SiteClass[|||],TranscriptAnnot[INTERGENIC(MODIFIER||||||||||1)]	Free Glucose	0.25397	0.1187	0.42441
Free Glucose	1-stearoyl-2-linoleoyl-GPE (18:0/18:2)*	52446	-0.32458	0.041	FBgn0051759	2L:12207709-12210110	-0.45364	0.0037	2R_11473864_DEL	0.4474	6.63524e-07	0.0008011	0.000961538	SiteClass[|||],TranscriptAnnot[INTERGENIC(MODIFIER||||||||||1)]	Free Glucose	-0.15891	0.3339	0.42441
Free Glucose	1-stearoyl-2-linoleoyl-GPE (18:0/18:2)*	52446	-0.32458	0.041	FBgn0263748	X:15673179-15674247	0.48239	0.0019	2R_11473906_SNP	0.4359	5.89518e-07	0.0002391	0.000961538	SiteClass[|||],TranscriptAnnot[INTERGENIC(MODIFIER||||||||||1)]	Free Glucose	-0.28806	0.0754	0.167804
Free Glucose	1-stearoyl-2-linoleoyl-GPE (18:0/18:2)*	52446	-0.32458	0.041	XLOC_006819	2R:4758529-4759724	0.48158	0.0019	2R_11473906_SNP	0.4359	5.89518e-07	0.000204	0.000961538	SiteClass[|||],TranscriptAnnot[INTERGENIC(MODIFIER||||||||||1)]	Free Glucose	-0.02328	0.8881	0.167804
Free Glucose	1-stearoyl-2-linoleoyl-GPE (18:0/18:2)*	52446	-0.32458	0.041	FBgn0011674	2R:16708767-16723533	-0.48664	0.0017	2R_11473906_SNP	0.4359	5.89518e-07	0.0001071	0.000961538	SiteClass[|||],TranscriptAnnot[INTERGENIC(MODIFIER||||||||||1)]	Free Glucose	0.06457	0.6961	0.167804
Free Glucose	1-stearoyl-2-linoleoyl-GPE (18:0/18:2)*	52446	-0.32458	0.041	FBgn0029712	X:4443103-4443990	0.53684	0.0004	2R_11473906_SNP	0.4359	5.89518e-07	0.0001345	0.000961538	SiteClass[|||],TranscriptAnnot[INTERGENIC(MODIFIER||||||||||1)]	Free Glucose	0.07733	0.6399	0.167804
Free Glucose	1-stearoyl-2-linoleoyl-GPE (18:0/18:2)*	52446	-0.32458	0.041	FBgn0051759	2L:12207709-12210110	-0.45364	0.0037	2R_11473906_SNP	0.4359	5.89518e-07	0.0006435	0.000961538	SiteClass[|||],TranscriptAnnot[INTERGENIC(MODIFIER||||||||||1)]	Free Glucose	-0.15891	0.3339	0.167804
Free Glucose	1-stearoyl-2-linoleoyl-GPE (18:0/18:2)*	52446	-0.32458	0.041	FBgn0263412	3R:26958052-26958772	0.59494	<.0001	2R_11473906_SNP	0.4359	5.89518e-07	0.0001104	0.000961538	SiteClass[|||],TranscriptAnnot[INTERGENIC(MODIFIER||||||||||1)]	Free Glucose	0.25397	0.1187	0.167804
Free Glucose	1-stearoyl-2-linoleoyl-GPE (18:0/18:2)*	52446	-0.32458	0.041	FBgn0036030	3L:9676679-9689800	-0.53765	0.0004	2R_11473906_SNP	0.4359	5.89518e-07	2.608e-05	0.000961538	SiteClass[|||],TranscriptAnnot[INTERGENIC(MODIFIER||||||||||1)]	Free Glucose	0.31822	0.0484	0.167804
Free Glucose	glucose	48152	0.57467	0.0001	FBgn0000406	2L:16788774-16790721	0.56943	0.0002	2R_11677031_SNP	0.45	2.13133e-06	0.004472	0.00555556	SiteClass[FBgn0265991|Zasp52|INTRON|0],TranscriptAnnot[INTRON(MODIFIER||||1082|Zasp52|protein_coding|CODING|FBtr0087315|2|1);INTRON(MODIFIER||||780|Zasp52|protein_coding|CODING|FBtr0100387|2|1);INTRON(MODIFIER||||2194|Zasp52|protein_coding|CODING|FBtr0100388|2|1);INTRON(MODIFIER||||890|Zasp52|protein_coding|CODING|FBtr0111048|2|1);INTRON(MODIFIER||||1271|Zasp52|protein_coding|CODING|FBtr0301313|2…	Free Glucose	0.09555	0.5629	0.000159529
Free Glucose	glucose	48152	0.57467	0.0001	XLOC_028989	X:2638895-2655578	-0.4583	0.0033	2R_11677031_SNP	0.45	2.13133e-06	0.0001481	0.00555556	SiteClass[FBgn0265991|Zasp52|INTRON|0],TranscriptAnnot[INTRON(MODIFIER||||1082|Zasp52|protein_coding|CODING|FBtr0087315|2|1);INTRON(MODIFIER||||780|Zasp52|protein_coding|CODING|FBtr0100387|2|1);INTRON(MODIFIER||||2194|Zasp52|protein_coding|CODING|FBtr0100388|2|1);INTRON(MODIFIER||||890|Zasp52|protein_coding|CODING|FBtr0111048|2|1);INTRON(MODIFIER||||1271|Zasp52|protein_coding|CODING|FBtr0301313|2…	Free Glucose	0.1253	0.4472	0.000159529
Free Glucose	glucose	48152	0.57467	0.0001	FBgn0043791	3R:5320523-5322445	0.51437	0.0008	2R_11677031_SNP	0.45	2.13133e-06	0.003426	0.00555556	SiteClass[FBgn0265991|Zasp52|INTRON|0],TranscriptAnnot[INTRON(MODIFIER||||1082|Zasp52|protein_coding|CODING|FBtr0087315|2|1);INTRON(MODIFIER||||780|Zasp52|protein_coding|CODING|FBtr0100387|2|1);INTRON(MODIFIER||||2194|Zasp52|protein_coding|CODING|FBtr0100388|2|1);INTRON(MODIFIER||||890|Zasp52|protein_coding|CODING|FBtr0111048|2|1);INTRON(MODIFIER||||1271|Zasp52|protein_coding|CODING|FBtr0301313|2…	Free Glucose	0.14717	0.3713	0.000159529
Free Glucose	glucose	48152	0.57467	0.0001	FBgn0036428	3L:14534037-14544075	0.62186	<.0001	2R_11677031_SNP	0.45	2.13133e-06	0.0001967	0.00555556	SiteClass[FBgn0265991|Zasp52|INTRON|0],TranscriptAnnot[INTRON(MODIFIER||||1082|Zasp52|protein_coding|CODING|FBtr0087315|2|1);INTRON(MODIFIER||||780|Zasp52|protein_coding|CODING|FBtr0100387|2|1);INTRON(MODIFIER||||2194|Zasp52|protein_coding|CODING|FBtr0100388|2|1);INTRON(MODIFIER||||890|Zasp52|protein_coding|CODING|FBtr0111048|2|1);INTRON(MODIFIER||||1271|Zasp52|protein_coding|CODING|FBtr0301313|2…	Free Glucose	0.3917	0.0137	0.000159529
Free Glucose	glucose	48152	0.57467	0.0001	FBgn0040732	2R:15387800-15388923	0.46235	0.003	2R_11677031_SNP	0.45	2.13133e-06	0.001773	0.00555556	SiteClass[FBgn0265991|Zasp52|INTRON|0],TranscriptAnnot[INTRON(MODIFIER||||1082|Zasp52|protein_coding|CODING|FBtr0087315|2|1);INTRON(MODIFIER||||780|Zasp52|protein_coding|CODING|FBtr0100387|2|1);INTRON(MODIFIER||||2194|Zasp52|protein_coding|CODING|FBtr0100388|2|1);INTRON(MODIFIER||||890|Zasp52|protein_coding|CODING|FBtr0111048|2|1);INTRON(MODIFIER||||1271|Zasp52|protein_coding|CODING|FBtr0301313|2…	Free Glucose	0.32834	0.0413	0.000159529
Free Glucose	kojibiose	21040	0.55872	0.0002	FBgn0031010	X:19171209-19174382	-0.46275	0.003	2R_11677031_SNP	0.45	4.08524e-06	0.0009496	0.00357143	SiteClass[FBgn0265991|Zasp52|INTRON|0],TranscriptAnnot[INTRON(MODIFIER||||1082|Zasp52|protein_coding|CODING|FBtr0087315|2|1);INTRON(MODIFIER||||780|Zasp52|protein_coding|CODING|FBtr0100387|2|1);INTRON(MODIFIER||||2194|Zasp52|protein_coding|CODING|FBtr0100388|2|1);INTRON(MODIFIER||||890|Zasp52|protein_coding|CODING|FBtr0111048|2|1);INTRON(MODIFIER||||1271|Zasp52|protein_coding|CODING|FBtr0301313|2…	Free Glucose	-0.22713	0.1644	0.000159529
Free Glucose	glucose	48152	0.57467	0.0001	FBgn0083972	2L:21096922-21098932	0.49413	0.0014	2R_11677031_SNP	0.45	2.13133e-06	0.00436	0.00555556	SiteClass[FBgn0265991|Zasp52|INTRON|0],TranscriptAnnot[INTRON(MODIFIER||||1082|Zasp52|protein_coding|CODING|FBtr0087315|2|1);INTRON(MODIFIER||||780|Zasp52|protein_coding|CODING|FBtr0100387|2|1);INTRON(MODIFIER||||2194|Zasp52|protein_coding|CODING|FBtr0100388|2|1);INTRON(MODIFIER||||890|Zasp52|protein_coding|CODING|FBtr0111048|2|1);INTRON(MODIFIER||||1271|Zasp52|protein_coding|CODING|FBtr0301313|2…	Free Glucose	0.41154	0.0092	0.000159529
Free Glucose	kojibiose	21040	0.55872	0.0002	XLOC_028989	X:2638895-2655578	-0.54575	0.0003	2R_11677031_SNP	0.45	4.08524e-06	0.0001481	0.00357143	SiteClass[FBgn0265991|Zasp52|INTRON|0],TranscriptAnnot[INTRON(MODIFIER||||1082|Zasp52|protein_coding|CODING|FBtr0087315|2|1);INTRON(MODIFIER||||780|Zasp52|protein_coding|CODING|FBtr0100387|2|1);INTRON(MODIFIER||||2194|Zasp52|protein_coding|CODING|FBtr0100388|2|1);INTRON(MODIFIER||||890|Zasp52|protein_coding|CODING|FBtr0111048|2|1);INTRON(MODIFIER||||1271|Zasp52|protein_coding|CODING|FBtr0301313|2…	Free Glucose	0.1253	0.4472	0.000159529
Free Glucose	isomaltose	39777	0.56848	0.0001	FBgn0036428	3L:14534037-14544075	0.5915	<.0001	2R_11677031_SNP	0.45	3.0851e-06	0.0001967	0.00263158	SiteClass[FBgn0265991|Zasp52|INTRON|0],TranscriptAnnot[INTRON(MODIFIER||||1082|Zasp52|protein_coding|CODING|FBtr0087315|2|1);INTRON(MODIFIER||||780|Zasp52|protein_coding|CODING|FBtr0100387|2|1);INTRON(MODIFIER||||2194|Zasp52|protein_coding|CODING|FBtr0100388|2|1);INTRON(MODIFIER||||890|Zasp52|protein_coding|CODING|FBtr0111048|2|1);INTRON(MODIFIER||||1271|Zasp52|protein_coding|CODING|FBtr0301313|2…	Free Glucose	0.3917	0.0137	0.000159529
Free Glucose	kojibiose	21040	0.55872	0.0002	FBgn0043791	3R:5320523-5322445	0.60304	<.0001	2R_11677031_SNP	0.45	4.08524e-06	0.003426	0.00357143	SiteClass[FBgn0265991|Zasp52|INTRON|0],TranscriptAnnot[INTRON(MODIFIER||||1082|Zasp52|protein_coding|CODING|FBtr0087315|2|1);INTRON(MODIFIER||||780|Zasp52|protein_coding|CODING|FBtr0100387|2|1);INTRON(MODIFIER||||2194|Zasp52|protein_coding|CODING|FBtr0100388|2|1);INTRON(MODIFIER||||890|Zasp52|protein_coding|CODING|FBtr0111048|2|1);INTRON(MODIFIER||||1271|Zasp52|protein_coding|CODING|FBtr0301313|2…	Free Glucose	0.14717	0.3713	0.000159529
Free Glucose	kojibiose	21040	0.55872	0.0002	FBgn0036428	3L:14534037-14544075	0.66275	<.0001	2R_11677031_SNP	0.45	4.08524e-06	0.0001967	0.00357143	SiteClass[FBgn0265991|Zasp52|INTRON|0],TranscriptAnnot[INTRON(MODIFIER||||1082|Zasp52|protein_coding|CODING|FBtr0087315|2|1);INTRON(MODIFIER||||780|Zasp52|protein_coding|CODING|FBtr0100387|2|1);INTRON(MODIFIER||||2194|Zasp52|protein_coding|CODING|FBtr0100388|2|1);INTRON(MODIFIER||||890|Zasp52|protein_coding|CODING|FBtr0111048|2|1);INTRON(MODIFIER||||1271|Zasp52|protein_coding|CODING|FBtr0301313|2…	Free Glucose	0.3917	0.0137	0.000159529
Free Glucose	kojibiose	21040	0.55872	0.0002	FBgn0040732	2R:15387800-15388923	0.4504	0.004	2R_11677031_SNP	0.45	4.08524e-06	0.001773	0.00357143	SiteClass[FBgn0265991|Zasp52|INTRON|0],TranscriptAnnot[INTRON(MODIFIER||||1082|Zasp52|protein_coding|CODING|FBtr0087315|2|1);INTRON(MODIFIER||||780|Zasp52|protein_coding|CODING|FBtr0100387|2|1);INTRON(MODIFIER||||2194|Zasp52|protein_coding|CODING|FBtr0100388|2|1);INTRON(MODIFIER||||890|Zasp52|protein_coding|CODING|FBtr0111048|2|1);INTRON(MODIFIER||||1271|Zasp52|protein_coding|CODING|FBtr0301313|2…	Free Glucose	0.32834	0.0413	0.000159529
Free Glucose	1-methylurate	34395	-0.39231	0.0123	XLOC_015254	3L:21896456-21896722	0.59636	<.0001	2R_12524065_SNP	0.125	2.50295e-07	0.0001329	0.000420168	SiteClass[FBgn0040505|Alk|INTRON|0],TranscriptAnnot[INTRON(MODIFIER||||1701|Alk|protein_coding|CODING|FBtr0087118|1|1);INTRON(MODIFIER||||1701|Alk|protein_coding|CODING|FBtr0331926|1|1)]	Free Glucose	-0.22551	0.1675	0.222671
Free Glucose	1-methylurate	34395	-0.39231	0.0123	XLOC_026860	4:942987-950743	-0.45547	0.0036	2R_12524065_SNP	0.125	2.50295e-07	0.0003809	0.000420168	SiteClass[FBgn0040505|Alk|INTRON|0],TranscriptAnnot[INTRON(MODIFIER||||1701|Alk|protein_coding|CODING|FBtr0087118|1|1);INTRON(MODIFIER||||1701|Alk|protein_coding|CODING|FBtr0331926|1|1)]	Free Glucose	0.15101	0.3588	0.222671
Free Glucose	1-methylurate	34395	-0.39231	0.0123	FBgn0039883	3R:27638331-27672292	0.47247	0.0024	2R_12578948_SNP	0.1316	5.33233e-06	0.0002506	0.000420168	SiteClass[FBgn0050463|CG30463|INTRON|0;FBgn0013763|CG5210|INTRON|0],TranscriptAnnot[UPSTREAM(MODIFIER||258||452|CG5210|protein_coding|CODING|FBtr0087111||1);INTRON(MODIFIER||||650|CG30463|protein_coding|CODING|FBtr0087112|6|1);INTRON(MODIFIER||||647|CG30463|protein_coding|CODING|FBtr0087113|5|1);INTRON(MODIFIER||||647|CG30463|protein_coding|CODING|FBtr0113379|6|1);INTRON(MODIFIER||||650|CG30463|p…	Free Glucose	-0.02935	0.8592	0.234045
Free Glucose	glycerol 3-phosphate	43847	0.38386	0.0145	FBgn0032222	2L:10331471-10333129	0.48745	0.0016	2R_13382917_SNP	0.1538	8.5801e-06	7.17e-05	0.000235849	SiteClass[FBgn0050103|CG30103|SYNONYMOUS_CODING|0],TranscriptAnnot[SYNONYMOUS_CODING(LOW|SILENT|gcC/gcT|A452|584|CG30103|protein_coding|CODING|FBtr0086929|6|1)]	Free Glucose	0.0415	0.8019	0.233314
Free Glucose	3-hydroxypropanoate	1556	-0.34071	0.0314	FBgn0040260	2L:16799025-16801584	-0.46235	0.003	2R_13412177_SNP	0.2105	9.88863e-06	0.0001209	0.000431034	SiteClass[FBgn0263197|Patronin|INTRON|0],TranscriptAnnot[INTRON(MODIFIER||||1517|Patronin|protein_coding|CODING|FBtr0086948|13|1);INTRON(MODIFIER||||1540|Patronin|protein_coding|CODING|FBtr0086949|14|1);INTRON(MODIFIER||||1630|Patronin|protein_coding|CODING|FBtr0086950|14|1);INTRON(MODIFIER||||1663|Patronin|protein_coding|CODING|FBtr0273446|14|1);INTRON(MODIFIER||||1599|Patronin|protein_coding|CO…	Free Glucose	0.37834	0.0176	0.0639368
Free Glucose	1-stearoyl-2-linoleoyl-GPE (18:0/18:2)*	52446	-0.32458	0.041	FBgn0036668	3L:16838486-16845450	-0.48482	0.0018	2R_14100380_SNP	0.1842	1.79453e-06	1.299e-05	0.000961538	SiteClass[|||],TranscriptAnnot[INTERGENIC(MODIFIER||||||||||1)]	Free Glucose	-0.03846	0.8162	0.149932
Free Glucose	glycerol 3-phosphate	43847	0.38386	0.0145	FBgn0052412	3L:5893935-5895556	0.51741	0.0007	2R_14362305_SNP	0.175	1.97326e-06	0.0001722	0.000235849	SiteClass[FBgn0028496|CG30116|INTRON|0],TranscriptAnnot[INTRON(MODIFIER||||1701|CG30116|protein_coding|CODING|FBtr0086718|6|1);INTRON(MODIFIER||||1698|CG30116|protein_coding|CODING|FBtr0086719|6|1);INTRON(MODIFIER||||1922|CG30116|protein_coding|CODING|FBtr0086720|6|1);INTRON(MODIFIER||||1698|CG30116|protein_coding|CODING|FBtr0086721|6|1)]	Free Glucose	0.0587	0.7226	0.0382058
Free Glucose	1-methylurate	34395	-0.39231	0.0123	FBgn0063493	2R:14294429-14295193	-0.5081	0.001	2R_14706448_INS	0.1842	2.83776e-06	0.0002817	0.000420168	SiteClass[FBgn0010551|Phb2|UPSTREAM|523],TranscriptAnnot[UPSTREAM(MODIFIER||523||299|Phb2|protein_coding|CODING|FBtr0086614||1);UPSTREAM(MODIFIER||523||299|Phb2|protein_coding|CODING|FBtr0086615||1);UPSTREAM(MODIFIER||523||299|Phb2|protein_coding|CODING|FBtr0086616||1);UPSTREAM(MODIFIER||523||303|Phb2|protein_coding|CODING|FBtr0112861||1);UPSTREAM(MODIFIER||523||338|Phb2|protein_coding|CODING|FBt…	Free Glucose	0.25951	0.1106	0.487593
Free Glucose	3-hydroxypropanoate	1556	-0.34071	0.0314	XLOC_006366	2R:736073-743354	-0.5751	0.0001	2R_15194834_SNP	0.1892	3.37675e-07	8.048e-05	0.000431034	SiteClass[FBgn0034433|EndoB|DOWNSTREAM|118;FBgn0034432|CG7461|DOWNSTREAM|145],TranscriptAnnot[UTR_3_PRIME(MODIFIER||222||627|CG7461|protein_coding|CODING|FBtr0345425|1|1);DOWNSTREAM(MODIFIER||118||390|EndoB|protein_coding|CODING|FBtr0086558||1);DOWNSTREAM(MODIFIER||118||378|EndoB|protein_coding|CODING|FBtr0086559||1);DOWNSTREAM(MODIFIER||118||378|EndoB|protein_coding|CODING|FBtr0113097||1);DOWNST…	Free Glucose	0.15425	0.3485	0.196074
Free Glucose	3-hydroxypropanoate	1556	-0.34071	0.0314	FBgn0034433	2R:15194952-15198170	0.45992	0.0032	2R_15194859_SNP	0.3529	1.30384e-06	0.0004075	0.000431034	SiteClass[FBgn0034433|EndoB|DOWNSTREAM|93;FBgn0034432|CG7461|DOWNSTREAM|170],TranscriptAnnot[UTR_3_PRIME(MODIFIER||247||627|CG7461|protein_coding|CODING|FBtr0345425|1|1);DOWNSTREAM(MODIFIER||93||390|EndoB|protein_coding|CODING|FBtr0086558||1);DOWNSTREAM(MODIFIER||93||378|EndoB|protein_coding|CODING|FBtr0086559||1);DOWNSTREAM(MODIFIER||93||378|EndoB|protein_coding|CODING|FBtr0113097||1);DOWNSTREAM…	Free Glucose	-0.23138	0.1564	0.303622
Free Glucose	3-hydroxypropanoate	1556	-0.34071	0.0314	FBgn0030758	X:16454717-16481205	0.4834	0.0018	2R_15194859_SNP	0.3529	1.30384e-06	9.533e-05	0.000431034	SiteClass[FBgn0034433|EndoB|DOWNSTREAM|93;FBgn0034432|CG7461|DOWNSTREAM|170],TranscriptAnnot[UTR_3_PRIME(MODIFIER||247||627|CG7461|protein_coding|CODING|FBtr0345425|1|1);DOWNSTREAM(MODIFIER||93||390|EndoB|protein_coding|CODING|FBtr0086558||1);DOWNSTREAM(MODIFIER||93||378|EndoB|protein_coding|CODING|FBtr0086559||1);DOWNSTREAM(MODIFIER||93||378|EndoB|protein_coding|CODING|FBtr0113097||1);DOWNSTREAM…	Free Glucose	-0.16073	0.3283	0.303622
Free Glucose	sucrose	1519	-0.41895	0.0071	FBgn0023000	3L:343378-346957	-0.49271	0.0014	2R_17098451_SNP	0.2105	5.31841e-06	0.0005615	0.00208333	SiteClass[FBgn0265180|CG44245|INTRON|0;FBgn0265191|Glycogenin|DOWNSTREAM|125],TranscriptAnnot[UTR_5_PRIME(MODIFIER||278||440|CG44245|protein_coding|CODING|FBtr0339095|1|1);DOWNSTREAM(MODIFIER||125||699|Glycogenin|protein_coding|CODING|FBtr0339089||1);DOWNSTREAM(MODIFIER||125||334|Glycogenin|protein_coding|CODING|FBtr0339092||1);INTRON(MODIFIER||||436|CG44245|protein_coding|CODING|FBtr0339094|1|1)]	Free Glucose	0.11377	0.4905	0.207
Free Glucose	3-hydroxypropanoate	1556	-0.34071	0.0314	FBgn0050115	2R:14441624-14499282	-0.45263	0.0038	2R_17420480_SNP	0.1538	7.22759e-06	0.0003052	0.000431034	SiteClass[FBgn0003731|Egfr|INTRON|0;FBgn0265938|CR44725|UPSTREAM|780],TranscriptAnnot[UPSTREAM(MODIFIER||780|||CR44725|ncRNA|NON_CODING|FBtr0342902||1);INTRON(MODIFIER||||1377|Egfr|protein_coding|CODING|FBtr0071653|1|1)]	Free Glucose	-0.15283	0.353	0.39798
Free Glucose	flavin mononucleotide (FMN)	15797	0.40375	0.0098	FBgn0030105	X:9110905-9111499	0.4664	0.0028	2R_17545787_SNP	0.2051	7.21669e-06	0.0002358	0.00217391	SiteClass[FBgn0034645|CG10320|INTRON|0;FBgn0034644|CG10082|DOWNSTREAM|347;FBgn0034646|Rae1|DOWNSTREAM|488],TranscriptAnnot[UPSTREAM(MODIFIER||15||110|CG10320|protein_coding|CODING|FBtr0071663||1);DOWNSTREAM(MODIFIER||854||672|CG10082|protein_coding|CODING|FBtr0071662||1);DOWNSTREAM(MODIFIER||488||346|Rae1|protein_coding|CODING|FBtr0071683||1);DOWNSTREAM(MODIFIER||347||902|CG10082|protein_coding|C…	Free Glucose	0.02105	0.8988	0.000207062
Free Glucose	glycerol 3-phosphate	43847	0.38386	0.0145	FBgn0032222	2L:10331471-10333129	0.48745	0.0016	2R_17570874_SNP	0.1053	6.15337e-06	0.0001296	0.000235849	SiteClass[FBgn0050263|CG30263|INTRON|0],TranscriptAnnot[INTRON(MODIFIER||||1870|CG30263|protein_coding|CODING|FBtr0273308|5|1);INTRON(MODIFIER||||1959|CG30263|protein_coding|CODING|FBtr0331982|7|1)]	Free Glucose	0.0415	0.8019	0.484092
Free Glucose	kojibiose	21040	0.55872	0.0002	FBgn0263199	3L:8975312-8979191	0.51093	0.0009	2R_18244147_SNP	0.4359	6.95697e-06	0.003435	0.00357143	SiteClass[FBgn0034720|Liprin-gamma|INTRON|0],TranscriptAnnot[INTRON(MODIFIER||||852|Liprin-gamma|protein_coding|CODING|FBtr0113107|2|1);INTRON(MODIFIER||||1023|Liprin-gamma|protein_coding|CODING|FBtr0071846|2|1);INTRON(MODIFIER||||1082|Liprin-gamma|protein_coding|CODING|FBtr0342990|2|1)]	Free Glucose	0.05061	0.7596	0.0449543
Free Glucose	kojibiose	21040	0.55872	0.0002	FBgn0044047	X:2225526-2228691	0.53866	0.0004	2R_18244147_SNP	0.4359	6.95697e-06	9.61e-05	0.00357143	SiteClass[FBgn0034720|Liprin-gamma|INTRON|0],TranscriptAnnot[INTRON(MODIFIER||||852|Liprin-gamma|protein_coding|CODING|FBtr0113107|2|1);INTRON(MODIFIER||||1023|Liprin-gamma|protein_coding|CODING|FBtr0071846|2|1);INTRON(MODIFIER||||1082|Liprin-gamma|protein_coding|CODING|FBtr0342990|2|1)]	Free Glucose	0.36417	0.0227	0.0449543
Free Glucose	sucrose	1519	-0.41895	0.0071	FBgn0023000	3L:343378-346957	-0.49271	0.0014	2R_18505537_SNP	0.1389	9.68056e-07	2.515e-05	0.00208333	SiteClass[FBgn0053143|CG33143|INTRON|0],TranscriptAnnot[INTRON(MODIFIER||||502|CG33143|protein_coding|CODING|FBtr0071858|1|1);INTRON(MODIFIER||||539|CG33143|protein_coding|CODING|FBtr0343008|1|1);INTRON(MODIFIER||||516|CG33143|protein_coding|CODING|FBtr0343009|1|1);INTRON(MODIFIER||||757|CG33143|protein_coding|CODING|FBtr0343010|1|1)]	Free Glucose	0.11377	0.4905	0.0228626
Free Glucose	pseudouridine	33442	-0.37092	0.0185	FBgn0051445	3R:25066302-25070549	-0.45364	0.0037	2R_18966597_SNP	0.175	3.44482e-06	0.0001983	0.000617284	SiteClass[FBgn0034817|Art7|UPSTREAM|36;FBgn0263707|CG43659|DOWNSTREAM|306],TranscriptAnnot[UPSTREAM(MODIFIER||36||690|Art7|protein_coding|CODING|FBtr0114564||1);DOWNSTREAM(MODIFIER||306||86|CG43659|protein_coding|CODING|FBtr0310345||1);INTERGENIC(MODIFIER||||||||||1)]	Free Glucose	-0.10688	0.5172	0.248239
Free Glucose	panose	37284	0.39606	0.0114	FBgn0031888	2L:7069536-7084635	-0.52692	0.0006	2R_20941095_SNP	0.2051	2.95289e-06	0.0004151	0.00138889	SiteClass[|||],TranscriptAnnot[INTERGENIC(MODIFIER||||||||||1)]	Free Glucose	-0.01822	0.9123	0.96103
Free Glucose	panose	37284	0.39606	0.0114	FBgn0031888	2L:7069536-7084635	-0.52692	0.0006	2R_20941428_SNP	0.225	4.34111e-06	0.0002549	0.00138889	SiteClass[|||],TranscriptAnnot[INTERGENIC(MODIFIER||||||||||1)]	Free Glucose	-0.01822	0.9123	0.784972
Free Glucose	panose	37284	0.39606	0.0114	FBgn0031888	2L:7069536-7084635	-0.52692	0.0006	2R_20953235_SNP	0.2368	5.79949e-06	0.0007556	0.00138889	SiteClass[|||],TranscriptAnnot[INTERGENIC(MODIFIER||||||||||1)]	Free Glucose	-0.01822	0.9123	0.587803
Free Glucose	choline phosphate	34396	0.3955	0.0115	FBgn0263336	2R:12705024-12706745	0.48664	0.0017	2R_3094149_SNP	0.2778	5.24615e-06	0.001845	0.005	SiteClass[FBgn0003090|pk|INTRON|0],TranscriptAnnot[INTRON(MODIFIER||||963|pk|protein_coding|CODING|FBtr0089042|1|1);INTRON(MODIFIER||||1029|pk|protein_coding|CODING|FBtr0089043|1|1);INTRON(MODIFIER||||1299|pk|protein_coding|CODING|FBtr0089044|2|1)]	Free Glucose	-0.05931	0.7198	0.209758
Free Glucose	choline phosphate	34396	0.3955	0.0115	FBgn0031227	2L:153539-155305	-0.48563	0.0017	2R_3094149_SNP	0.2778	5.24615e-06	0.003286	0.005	SiteClass[FBgn0003090|pk|INTRON|0],TranscriptAnnot[INTRON(MODIFIER||||963|pk|protein_coding|CODING|FBtr0089042|1|1);INTRON(MODIFIER||||1029|pk|protein_coding|CODING|FBtr0089043|1|1);INTRON(MODIFIER||||1299|pk|protein_coding|CODING|FBtr0089044|2|1)]	Free Glucose	-0.23745	0.1455	0.209758
Free Glucose	3-hydroxypropanoate	1556	-0.34071	0.0314	FBgn0040260	2L:16799025-16801584	-0.46235	0.003	2R_3771138_SNP	0.1351	1.39962e-06	9.238e-05	0.000431034	SiteClass[FBgn0085390|Dgk|INTRON|0],TranscriptAnnot[INTRON(MODIFIER||||1211|Dgk|protein_coding|CODING|FBtr0112580|1|1);INTRON(MODIFIER||||1108|Dgk|protein_coding|CODING|FBtr0112581|1|1);INTRON(MODIFIER||||1230|Dgk|protein_coding|CODING|FBtr0308589|1|1);INTRON(MODIFIER||||1139|Dgk|protein_coding|CODING|FBtr0330238|1|1)]	Free Glucose	0.37834	0.0176	0.126225
Free Glucose	1-palmitoleoyl-2-oleoyl-glycerol (16:1/18:1)*	52632	0.32645	0.0398	FBgn0045038	2L:7864642-7871432	-0.55587	0.0002	2R_4112533_SNP	0.125	4.68992e-07	7.494e-06	0.00121951	SiteClass[FBgn0053087|LRP1|SYNONYMOUS_CODING|0],TranscriptAnnot[SYNONYMOUS_CODING(LOW|SILENT|tcC/tcT|S4643|4730|LRP1|protein_coding|CODING|FBtr0344894|21|1);SYNONYMOUS_CODING(LOW|SILENT|tcC/tcT|S4669|4752|LRP1|protein_coding|CODING|FBtr0344893|22|1)]	Free Glucose	-0.07409	0.654	0.446207
Free Glucose	1-palmitoleoyl-2-oleoyl-glycerol (16:1/18:1)*	52632	0.32645	0.0398	FBgn0014469	2R:4332065-4334669	-0.45263	0.0038	2R_4112533_SNP	0.125	4.68992e-07	0.001167	0.00121951	SiteClass[FBgn0053087|LRP1|SYNONYMOUS_CODING|0],TranscriptAnnot[SYNONYMOUS_CODING(LOW|SILENT|tcC/tcT|S4643|4730|LRP1|protein_coding|CODING|FBtr0344894|21|1);SYNONYMOUS_CODING(LOW|SILENT|tcC/tcT|S4669|4752|LRP1|protein_coding|CODING|FBtr0344893|22|1)]	Free Glucose	0.07996	0.6285	0.446207
Free Glucose	1-palmitoleoyl-2-oleoyl-glycerol (16:1/18:1)*	52632	0.32645	0.0398	FBgn0050054	2R:8511231-8512857	-0.45769	0.0034	2R_4112533_SNP	0.125	4.68992e-07	0.0005805	0.00121951	SiteClass[FBgn0053087|LRP1|SYNONYMOUS_CODING|0],TranscriptAnnot[SYNONYMOUS_CODING(LOW|SILENT|tcC/tcT|S4643|4730|LRP1|protein_coding|CODING|FBtr0344894|21|1);SYNONYMOUS_CODING(LOW|SILENT|tcC/tcT|S4669|4752|LRP1|protein_coding|CODING|FBtr0344893|22|1)]	Free Glucose	0.1085	0.5109	0.446207
Free Glucose	1-palmitoleoyl-2-oleoyl-glycerol (16:1/18:1)*	52632	0.32645	0.0398	FBgn0014469	2R:4332065-4334669	-0.45263	0.0038	2R_4112545_SNP	0.1282	4.11633e-07	0.001211	0.00121951	SiteClass[FBgn0053087|LRP1|SYNONYMOUS_CODING|0],TranscriptAnnot[SYNONYMOUS_CODING(LOW|SILENT|ttG/ttA|L4647|4730|LRP1|protein_coding|CODING|FBtr0344894|21|1);SYNONYMOUS_CODING(LOW|SILENT|ttG/ttA|L4673|4752|LRP1|protein_coding|CODING|FBtr0344893|22|1)]	Free Glucose	0.07996	0.6285	0.444412
Free Glucose	1-palmitoleoyl-2-oleoyl-glycerol (16:1/18:1)*	52632	0.32645	0.0398	FBgn0045038	2L:7864642-7871432	-0.55587	0.0002	2R_4112545_SNP	0.1282	4.11633e-07	7.902e-06	0.00121951	SiteClass[FBgn0053087|LRP1|SYNONYMOUS_CODING|0],TranscriptAnnot[SYNONYMOUS_CODING(LOW|SILENT|ttG/ttA|L4647|4730|LRP1|protein_coding|CODING|FBtr0344894|21|1);SYNONYMOUS_CODING(LOW|SILENT|ttG/ttA|L4673|4752|LRP1|protein_coding|CODING|FBtr0344893|22|1)]	Free Glucose	-0.07409	0.654	0.444412
Free Glucose	1-palmitoleoyl-2-oleoyl-glycerol (16:1/18:1)*	52632	0.32645	0.0398	FBgn0050054	2R:8511231-8512857	-0.45769	0.0034	2R_4112545_SNP	0.1282	4.11633e-07	0.0006543	0.00121951	SiteClass[FBgn0053087|LRP1|SYNONYMOUS_CODING|0],TranscriptAnnot[SYNONYMOUS_CODING(LOW|SILENT|ttG/ttA|L4647|4730|LRP1|protein_coding|CODING|FBtr0344894|21|1);SYNONYMOUS_CODING(LOW|SILENT|ttG/ttA|L4673|4752|LRP1|protein_coding|CODING|FBtr0344893|22|1)]	Free Glucose	0.1085	0.5109	0.444412
Free Glucose	1-palmitoleoyl-2-oleoyl-glycerol (16:1/18:1)*	52632	0.32645	0.0398	FBgn0045038	2L:7864642-7871432	-0.55587	0.0002	2R_4112709_DEL	0.1316	3.42593e-07	9.645e-06	0.00121951	SiteClass[FBgn0053087|LRP1|INTRON|0],TranscriptAnnot[INTRON(MODIFIER||||4730|LRP1|protein_coding|CODING|FBtr0344894|21|1);INTRON(MODIFIER||||4752|LRP1|protein_coding|CODING|FBtr0344893|22|1)]	Free Glucose	-0.07409	0.654	0.492633
Free Glucose	1-palmitoleoyl-2-oleoyl-glycerol (16:1/18:1)*	52632	0.32645	0.0398	FBgn0050054	2R:8511231-8512857	-0.45769	0.0034	2R_4112709_DEL	0.1316	3.42593e-07	0.0009157	0.00121951	SiteClass[FBgn0053087|LRP1|INTRON|0],TranscriptAnnot[INTRON(MODIFIER||||4730|LRP1|protein_coding|CODING|FBtr0344894|21|1);INTRON(MODIFIER||||4752|LRP1|protein_coding|CODING|FBtr0344893|22|1)]	Free Glucose	0.1085	0.5109	0.492633
Free Glucose	1-palmitoleoyl-2-oleoyl-glycerol (16:1/18:1)*	52632	0.32645	0.0398	FBgn0050054	2R:8511231-8512857	-0.45769	0.0034	2R_4112755_SNP	0.1316	2.7585e-07	0.000812	0.00121951	SiteClass[FBgn0053087|LRP1|INTRON|0],TranscriptAnnot[SPLICE_SITE_ACCEPTOR(HIGH||||4730|LRP1|protein_coding|CODING|FBtr0344894|22|1);INTRON(MODIFIER||||4730|LRP1|protein_coding|CODING|FBtr0344894|21|1);INTRON(MODIFIER||||4752|LRP1|protein_coding|CODING|FBtr0344893|22|1)]	Free Glucose	0.1085	0.5109	0.471259
Free Glucose	1-palmitoleoyl-2-oleoyl-glycerol (16:1/18:1)*	52632	0.32645	0.0398	FBgn0045038	2L:7864642-7871432	-0.55587	0.0002	2R_4112755_SNP	0.1316	2.7585e-07	1.053e-05	0.00121951	SiteClass[FBgn0053087|LRP1|INTRON|0],TranscriptAnnot[SPLICE_SITE_ACCEPTOR(HIGH||||4730|LRP1|protein_coding|CODING|FBtr0344894|22|1);INTRON(MODIFIER||||4730|LRP1|protein_coding|CODING|FBtr0344894|21|1);INTRON(MODIFIER||||4752|LRP1|protein_coding|CODING|FBtr0344893|22|1)]	Free Glucose	-0.07409	0.654	0.471259
Free Glucose	1-palmitoleoyl-2-oleoyl-glycerol (16:1/18:1)*	52632	0.32645	0.0398	FBgn0045038	2L:7864642-7871432	-0.55587	0.0002	2R_4119375_SNP	0.1538	3.61145e-06	6.644e-05	0.00121951	SiteClass[FBgn0010109|dpn|INTRON|0],TranscriptAnnot[INTRON(MODIFIER||||435|dpn|protein_coding|CODING|FBtr0088803|1|1)]	Free Glucose	-0.07409	0.654	0.887672
Free Glucose	histamine	1574	-0.36831	0.0194	XLOC_017830	3L:15931447-15935182	0.49162	0.0015	2R_4172704_SNP	0.3636	2.25224e-06	0.0007955	0.00172414	SiteClass[|||],TranscriptAnnot[INTERGENIC(MODIFIER||||||||||1)]	Free Glucose	-0.12611	0.4443	0.0226608
Free Glucose	histamine	1574	-0.36831	0.0194	FBgn0002036	2L:19114401-19116570	-0.49729	0.0013	2R_4172704_SNP	0.3636	2.25224e-06	0.001666	0.00172414	SiteClass[|||],TranscriptAnnot[INTERGENIC(MODIFIER||||||||||1)]	Free Glucose	0.00668	0.9678	0.0226608
Free Glucose	histamine	1574	-0.36831	0.0194	FBgn0038830	3R:16649035-16649961	-0.50195	0.0011	2R_4172704_SNP	0.3636	2.25224e-06	0.00136	0.00172414	SiteClass[|||],TranscriptAnnot[INTERGENIC(MODIFIER||||||||||1)]	Free Glucose	-0.00607	0.9707	0.0226608
Free Glucose	histamine	1574	-0.36831	0.0194	XLOC_011948	2RHet:1297603-1303198	0.56389	0.0002	2R_4172704_SNP	0.3636	2.25224e-06	0.001676	0.00172414	SiteClass[|||],TranscriptAnnot[INTERGENIC(MODIFIER||||||||||1)]	Free Glucose	-0.17004	0.3007	0.0226608
Free Glucose	histamine	1574	-0.36831	0.0194	FBgn0013469	3L:10974271-11002288	0.47118	0.0025	2R_4172704_SNP	0.3636	2.25224e-06	0.001144	0.00172414	SiteClass[|||],TranscriptAnnot[INTERGENIC(MODIFIER||||||||||1)]	Free Glucose	-0.18846	0.2506	0.0226608
Free Glucose	histamine	1574	-0.36831	0.0194	FBgn0032260	2L:10489900-10491454	-0.46865	0.0026	2R_4172704_SNP	0.3636	2.25224e-06	0.0004436	0.00172414	SiteClass[|||],TranscriptAnnot[INTERGENIC(MODIFIER||||||||||1)]	Free Glucose	0.08887	0.5906	0.0226608
Free Glucose	histamine	1574	-0.36831	0.0194	FBgn0031150	X:20924990-20953418	-0.50013	0.0012	2R_4172704_SNP	0.3636	2.25224e-06	0.0005378	0.00172414	SiteClass[|||],TranscriptAnnot[INTERGENIC(MODIFIER||||||||||1)]	Free Glucose	0.17166	0.2961	0.0226608
Free Glucose	3-hydroxypropanoate	1556	-0.34071	0.0314	FBgn0036956	3L:20224769-20226355	0.53846	0.0004	2R_4630532_SNP	0.2821	2.86624e-07	5.399e-05	0.000431034	SiteClass[FBgn0027585|CG8740|INTRON|0],TranscriptAnnot[INTRON(MODIFIER||||1269|CG8740|protein_coding|CODING|FBtr0290115|1|1);INTRON(MODIFIER||||1257|CG8740|protein_coding|CODING|FBtr0339338|1|1);INTRON(MODIFIER||||985|CG8740|protein_coding|CODING|FBtr0088712|1|1);INTRON(MODIFIER||||985|CG8740|protein_coding|CODING|FBtr0088711|1|1)]	Free Glucose	-0.05628	0.7336	0.225265
Free Glucose	glycerol 3-phosphate	43847	0.38386	0.0145	FBgn0032222	2L:10331471-10333129	0.48745	0.0016	2R_5589399_SNP	0.1026	2.29739e-06	0.0001621	0.000235849	SiteClass[|||],TranscriptAnnot[INTERGENIC(MODIFIER||||||||||1)]	Free Glucose	0.0415	0.8019	0.0113121
Free Glucose	histamine	1574	-0.36831	0.0194	FBgn0038830	3R:16649035-16649961	-0.50195	0.0011	2R_9150716_SNP	0.125	4.74457e-06	9.39e-05	0.00172414	SiteClass[FBgn0259219|CG42319|INTRON|0],TranscriptAnnot[INTRON(MODIFIER||||131|CG42319|protein_coding|CODING|FBtr0299736|3|1);INTRON(MODIFIER||||131|CG42319|protein_coding|CODING|FBtr0299737|3|1);INTRON(MODIFIER||||131|CG42319|protein_coding|CODING|FBtr0299738|2|1);INTRON(MODIFIER||||251|CG42319|protein_coding|CODING|FBtr0299739|4|1);INTRON(MODIFIER||||452|CG42319|protein_coding|CODING|FBtr029974…	Free Glucose	-0.00607	0.9707	0.8961
Free Glucose	histamine	1574	-0.36831	0.0194	XLOC_017830	3L:15931447-15935182	0.49162	0.0015	2R_9150716_SNP	0.125	4.74457e-06	0.001169	0.00172414	SiteClass[FBgn0259219|CG42319|INTRON|0],TranscriptAnnot[INTRON(MODIFIER||||131|CG42319|protein_coding|CODING|FBtr0299736|3|1);INTRON(MODIFIER||||131|CG42319|protein_coding|CODING|FBtr0299737|3|1);INTRON(MODIFIER||||131|CG42319|protein_coding|CODING|FBtr0299738|2|1);INTRON(MODIFIER||||251|CG42319|protein_coding|CODING|FBtr0299739|4|1);INTRON(MODIFIER||||452|CG42319|protein_coding|CODING|FBtr029974…	Free Glucose	-0.12611	0.4443	0.8961
Free Glucose	histamine	1574	-0.36831	0.0194	XLOC_011947	2RHet:1285029-1285725	0.49496	0.0014	2R_9150716_SNP	0.125	4.74457e-06	0.001436	0.00172414	SiteClass[FBgn0259219|CG42319|INTRON|0],TranscriptAnnot[INTRON(MODIFIER||||131|CG42319|protein_coding|CODING|FBtr0299736|3|1);INTRON(MODIFIER||||131|CG42319|protein_coding|CODING|FBtr0299737|3|1);INTRON(MODIFIER||||131|CG42319|protein_coding|CODING|FBtr0299738|2|1);INTRON(MODIFIER||||251|CG42319|protein_coding|CODING|FBtr0299739|4|1);INTRON(MODIFIER||||452|CG42319|protein_coding|CODING|FBtr029974…	Free Glucose	-0.38563	0.0153	0.8961
Free Glucose	maltopentaose	35163	0.38668	0.0137	FBgn0000536	X:16172361-16179651	-0.48198	0.0019	2R_9263257_SNP	0.3684	5.3359e-06	0.0006059	0.0015625	SiteClass[FBgn0033830|CG10814|DOWNSTREAM|223],TranscriptAnnot[DOWNSTREAM(MODIFIER||223||402|CG10814|protein_coding|CODING|FBtr0087720||1);INTERGENIC(MODIFIER||||||||||1)]	Free Glucose	-0.36498	0.0223	0.00420322
Free Glucose	1-stearoyl-2-linoleoyl-GPE (18:0/18:2)*	52446	-0.32458	0.041	FBgn0002719	3R:8538825-8548164	0.4834	0.0018	2R_9740871_SNP	0.125	6.44065e-06	0.000957	0.000961538	SiteClass[FBgn0033879|CG6543|SYNONYMOUS_CODING|0;FBgn0050485|CG30485|DOWNSTREAM|383],TranscriptAnnot[SYNONYMOUS_CODING(LOW|SILENT|Ctg/Ttg|L213|295|CG6543|protein_coding|CODING|FBtr0087644|2|1);SYNONYMOUS_CODING(LOW|SILENT|Ctg/Ttg|L213|295|CG6543|protein_coding|CODING|FBtr0087643|3|1);DOWNSTREAM(MODIFIER||383||975|CG30485|protein_coding|CODING|FBtr0087640||1)]	Free Glucose	-0.3583	0.0251	0.564198
Free Glucose	1-palmitoleoyl-2-oleoyl-glycerol (16:1/18:1)*	52632	0.32645	0.0398	FBgn0035608	3L:5490623-5492058	-0.52895	0.0005	3L_1046417_SNP	0.1795	1.25993e-06	0.0006989	0.00121951	SiteClass[FBgn0004870|bab1|INTRON|0],TranscriptAnnot[INTRON(MODIFIER||||977|bab1|protein_coding|CODING|FBtr0072642|1|1);INTRON(MODIFIER||||970|bab1|protein_coding|CODING|FBtr0333268|1|1);INTRON(MODIFIER||||971|bab1|protein_coding|CODING|FBtr0333269|1|1);INTRON(MODIFIER||||976|bab1|protein_coding|CODING|FBtr0333270|1|1)]	Free Glucose	-0.24899	0.1264	0.235686
Free Glucose	1-palmitoleoyl-2-oleoyl-glycerol (16:1/18:1)*	52632	0.32645	0.0398	FBgn0010470	2R:17374672-17385434	-0.49555	0.0013	3L_1046417_SNP	0.1795	1.25993e-06	0.001127	0.00121951	SiteClass[FBgn0004870|bab1|INTRON|0],TranscriptAnnot[INTRON(MODIFIER||||977|bab1|protein_coding|CODING|FBtr0072642|1|1);INTRON(MODIFIER||||970|bab1|protein_coding|CODING|FBtr0333268|1|1);INTRON(MODIFIER||||971|bab1|protein_coding|CODING|FBtr0333269|1|1);INTRON(MODIFIER||||976|bab1|protein_coding|CODING|FBtr0333270|1|1)]	Free Glucose	-0.13866	0.3999	0.235686
Free Glucose	panose	37284	0.39606	0.0114	FBgn0259228	X:6674823-6697626	0.45142	0.0039	3L_10733540_SNP	0.1892	4.48768e-06	0.0002239	0.00138889	SiteClass[|||],TranscriptAnnot[INTERGENIC(MODIFIER||||||||||1)]	Free Glucose	0.06943	0.6745	0.593386
Free Glucose	histamine	1574	-0.36831	0.0194	FBgn0039326	3R:21146775-21148479	-0.47634	0.0022	3L_1076759_SNP	0.125	9.79883e-06	0.001135	0.00172414	SiteClass[FBgn0004870|bab1|INTRON|0],TranscriptAnnot[INTRON(MODIFIER||||977|bab1|protein_coding|CODING|FBtr0072642|1|1);INTRON(MODIFIER||||970|bab1|protein_coding|CODING|FBtr0333268|1|1);INTRON(MODIFIER||||971|bab1|protein_coding|CODING|FBtr0333269|1|1);INTRON(MODIFIER||||976|bab1|protein_coding|CODING|FBtr0333270|1|1)]	Free Glucose	0.42814	0.0065	0.628297
Free Glucose	histamine	1574	-0.36831	0.0194	XLOC_017830	3L:15931447-15935182	0.49162	0.0015	3L_10972015_SNP	0.1053	8.20127e-07	0.000898	0.00172414	SiteClass[FBgn0267309|CR45745|UPSTREAM|613],TranscriptAnnot[UPSTREAM(MODIFIER||613|||CR45745|ncRNA|NON_CODING|FBtr0346564||1);INTERGENIC(MODIFIER||||||||||1)]	Free Glucose	-0.12611	0.4443	0.689662
Free Glucose	histamine	1574	-0.36831	0.0194	FBgn0034725	2R:18291682-18296045	-0.45832	0.0033	3L_10972015_SNP	0.1053	8.20127e-07	0.0009948	0.00172414	SiteClass[FBgn0267309|CR45745|UPSTREAM|613],TranscriptAnnot[UPSTREAM(MODIFIER||613|||CR45745|ncRNA|NON_CODING|FBtr0346564||1);INTERGENIC(MODIFIER||||||||||1)]	Free Glucose	-0.21296	0.193	0.689662
Free Glucose	histamine	1574	-0.36831	0.0194	XLOC_011947	2RHet:1285029-1285725	0.49496	0.0014	3L_10972015_SNP	0.1053	8.20127e-07	0.001169	0.00172414	SiteClass[FBgn0267309|CR45745|UPSTREAM|613],TranscriptAnnot[UPSTREAM(MODIFIER||613|||CR45745|ncRNA|NON_CODING|FBtr0346564||1);INTERGENIC(MODIFIER||||||||||1)]	Free Glucose	-0.38563	0.0153	0.689662
Free Glucose	histamine	1574	-0.36831	0.0194	FBgn0039326	3R:21146775-21148479	-0.47634	0.0022	3L_10972015_SNP	0.1053	8.20127e-07	0.001112	0.00172414	SiteClass[FBgn0267309|CR45745|UPSTREAM|613],TranscriptAnnot[UPSTREAM(MODIFIER||613|||CR45745|ncRNA|NON_CODING|FBtr0346564||1);INTERGENIC(MODIFIER||||||||||1)]	Free Glucose	0.42814	0.0065	0.689662
Free Glucose	isomaltose	39777	0.56848	0.0001	FBgn0031888	2L:7069536-7084635	-0.48057	0.002	3L_11294751_SNP	0.225	5.25748e-06	0.002352	0.00263158	SiteClass[|||],TranscriptAnnot[INTERGENIC(MODIFIER||||||||||1)]	Free Glucose	-0.01822	0.9123	0.0135253
Free Glucose	isomaltose	39777	0.56848	0.0001	FBgn0083972	2L:21096922-21098932	0.50182	0.0011	3L_11294751_SNP	0.225	5.25748e-06	0.00193	0.00263158	SiteClass[|||],TranscriptAnnot[INTERGENIC(MODIFIER||||||||||1)]	Free Glucose	0.41154	0.0092	0.0135253
Free Glucose	glucose	48152	0.57467	0.0001	FBgn0033880	2R:9742083-9743283	-0.46053	0.0032	3L_11591767_SNP	0.2973	6.1572e-06	0.002745	0.00555556	SiteClass[FBgn0036179|CG7368|INTRON|0;FBgn0036178|CG14137|DOWNSTREAM|969],TranscriptAnnot[DOWNSTREAM(MODIFIER||969||103|CG14137|protein_coding|CODING|FBtr0076144||1);INTRON(MODIFIER||||530|CG7368|protein_coding|CODING|FBtr0110884|1|1)]	Free Glucose	0.01093	0.9473	0.511469
Free Glucose	glucose	48152	0.57467	0.0001	FBgn0033880	2R:9742083-9743283	-0.46053	0.0032	3L_11591815_SNP	0.2895	6.0182e-06	0.002972	0.00555556	SiteClass[FBgn0036179|CG7368|INTRON|0;FBgn0036178|CG14137|DOWNSTREAM|921],TranscriptAnnot[DOWNSTREAM(MODIFIER||921||103|CG14137|protein_coding|CODING|FBtr0076144||1);INTRON(MODIFIER||||530|CG7368|protein_coding|CODING|FBtr0110884|1|1)]	Free Glucose	0.01093	0.9473	0.483257
Free Glucose	glucose	48152	0.57467	0.0001	FBgn0030562	X:14182117-14183426	-0.47854	0.0021	3L_11591815_SNP	0.2895	6.0182e-06	0.004874	0.00555556	SiteClass[FBgn0036179|CG7368|INTRON|0;FBgn0036178|CG14137|DOWNSTREAM|921],TranscriptAnnot[DOWNSTREAM(MODIFIER||921||103|CG14137|protein_coding|CODING|FBtr0076144||1);INTRON(MODIFIER||||530|CG7368|protein_coding|CODING|FBtr0110884|1|1)]	Free Glucose	-0.04089	0.8048	0.483257
Free Glucose	propionylcarnitine	32452	-0.34747	0.028	FBgn0036428	3L:14534037-14544075	-0.52126	0.0007	3L_11685917_SNP	0.1026	3.56895e-07	0.001556	0.0015625	SiteClass[FBgn0036193|CG14135|DOWNSTREAM|60;FBgn0264479|CR43887|UPSTREAM|318],TranscriptAnnot[UPSTREAM(MODIFIER||318|||CR43887|ncRNA|NON_CODING|FBtr0332763||1);DOWNSTREAM(MODIFIER||60||255|CG14135|protein_coding|CODING|FBtr0290309||1);DOWNSTREAM(MODIFIER||60||259|CG14135|protein_coding|CODING|FBtr0332762||1);INTERGENIC(MODIFIER||||||||||1)]	Free Glucose	0.3917	0.0137	0.0440003
Free Glucose	propionylcarnitine	32452	-0.34747	0.028	FBgn0037090	3L:21494521-21497059	-0.46579	0.0028	3L_11685917_SNP	0.1026	3.56895e-07	0.0001841	0.0015625	SiteClass[FBgn0036193|CG14135|DOWNSTREAM|60;FBgn0264479|CR43887|UPSTREAM|318],TranscriptAnnot[UPSTREAM(MODIFIER||318|||CR43887|ncRNA|NON_CODING|FBtr0332763||1);DOWNSTREAM(MODIFIER||60||255|CG14135|protein_coding|CODING|FBtr0290309||1);DOWNSTREAM(MODIFIER||60||259|CG14135|protein_coding|CODING|FBtr0332762||1);INTERGENIC(MODIFIER||||||||||1)]	Free Glucose	0.06619	0.6889	0.0440003
Free Glucose	propionylcarnitine	32452	-0.34747	0.028	FBgn0035906	3L:8514529-8516601	-0.47206	0.0024	3L_11685917_SNP	0.1026	3.56895e-07	0.001444	0.0015625	SiteClass[FBgn0036193|CG14135|DOWNSTREAM|60;FBgn0264479|CR43887|UPSTREAM|318],TranscriptAnnot[UPSTREAM(MODIFIER||318|||CR43887|ncRNA|NON_CODING|FBtr0332763||1);DOWNSTREAM(MODIFIER||60||255|CG14135|protein_coding|CODING|FBtr0290309||1);DOWNSTREAM(MODIFIER||60||259|CG14135|protein_coding|CODING|FBtr0332762||1);INTERGENIC(MODIFIER||||||||||1)]	Free Glucose	0.09514	0.5645	0.0440003
Free Glucose	propionylcarnitine	32452	-0.34747	0.028	FBgn0030038	X:8331090-8335297	-0.49939	0.0012	3L_11685917_SNP	0.1026	3.56895e-07	0.0008918	0.0015625	SiteClass[FBgn0036193|CG14135|DOWNSTREAM|60;FBgn0264479|CR43887|UPSTREAM|318],TranscriptAnnot[UPSTREAM(MODIFIER||318|||CR43887|ncRNA|NON_CODING|FBtr0332763||1);DOWNSTREAM(MODIFIER||60||255|CG14135|protein_coding|CODING|FBtr0290309||1);DOWNSTREAM(MODIFIER||60||259|CG14135|protein_coding|CODING|FBtr0332762||1);INTERGENIC(MODIFIER||||||||||1)]	Free Glucose	0.15385	0.3497	0.0440003
Free Glucose	propionylcarnitine	32452	-0.34747	0.028	FBgn0017448	3R:27581078-27584359	0.45486	0.0036	3L_11695500_SNP	0.1538	5.73489e-07	0.0009636	0.0015625	SiteClass[FBgn0036196|CG11658|INTRON|0],TranscriptAnnot[INTRON(MODIFIER||||351|CG11658|protein_coding|CODING|FBtr0076124|2|1);INTRON(MODIFIER||||351|CG11658|protein_coding|CODING|FBtr0076125|2|1);INTRON(MODIFIER||||351|CG11658|protein_coding|CODING|FBtr0076126|2|1);INTRON(MODIFIER||||351|CG11658|protein_coding|CODING|FBtr0076127|2|1);INTRON(MODIFIER||||351|CG11658|protein_coding|CODING|FBtr007612…	Free Glucose	-0.27551	0.0896	0.0343347
Free Glucose	propionylcarnitine	32452	-0.34747	0.028	FBgn0040732	2R:15387800-15388923	-0.4749	0.0023	3L_11695500_SNP	0.1538	5.73489e-07	0.0005064	0.0015625	SiteClass[FBgn0036196|CG11658|INTRON|0],TranscriptAnnot[INTRON(MODIFIER||||351|CG11658|protein_coding|CODING|FBtr0076124|2|1);INTRON(MODIFIER||||351|CG11658|protein_coding|CODING|FBtr0076125|2|1);INTRON(MODIFIER||||351|CG11658|protein_coding|CODING|FBtr0076126|2|1);INTRON(MODIFIER||||351|CG11658|protein_coding|CODING|FBtr0076127|2|1);INTRON(MODIFIER||||351|CG11658|protein_coding|CODING|FBtr007612…	Free Glucose	0.32834	0.0413	0.0343347
Free Glucose	propionylcarnitine	32452	-0.34747	0.028	FBgn0036428	3L:14534037-14544075	-0.52126	0.0007	3L_11695500_SNP	0.1538	5.73489e-07	0.001073	0.0015625	SiteClass[FBgn0036196|CG11658|INTRON|0],TranscriptAnnot[INTRON(MODIFIER||||351|CG11658|protein_coding|CODING|FBtr0076124|2|1);INTRON(MODIFIER||||351|CG11658|protein_coding|CODING|FBtr0076125|2|1);INTRON(MODIFIER||||351|CG11658|protein_coding|CODING|FBtr0076126|2|1);INTRON(MODIFIER||||351|CG11658|protein_coding|CODING|FBtr0076127|2|1);INTRON(MODIFIER||||351|CG11658|protein_coding|CODING|FBtr007612…	Free Glucose	0.3917	0.0137	0.0343347
Free Glucose	propionylcarnitine	32452	-0.34747	0.028	XLOC_022569	3R:25692413-25694244	0.4502	0.004	3L_11695500_SNP	0.1538	5.73489e-07	0.001201	0.0015625	SiteClass[FBgn0036196|CG11658|INTRON|0],TranscriptAnnot[INTRON(MODIFIER||||351|CG11658|protein_coding|CODING|FBtr0076124|2|1);INTRON(MODIFIER||||351|CG11658|protein_coding|CODING|FBtr0076125|2|1);INTRON(MODIFIER||||351|CG11658|protein_coding|CODING|FBtr0076126|2|1);INTRON(MODIFIER||||351|CG11658|protein_coding|CODING|FBtr0076127|2|1);INTRON(MODIFIER||||351|CG11658|protein_coding|CODING|FBtr007612…	Free Glucose	0.10223	0.5357	0.0343347
Free Glucose	histamine	1574	-0.36831	0.0194	FBgn0036549	3L:15961304-15963002	-0.46946	0.0026	3L_12199028_SNP	0.125	6.45368e-06	0.001542	0.00172414	SiteClass[FBgn0036266|CG5626|INTRON|0;FBgn0260941|app|DOWNSTREAM|310],TranscriptAnnot[DOWNSTREAM(MODIFIER||310||693|app|protein_coding|CODING|FBtr0301056||1);DOWNSTREAM(MODIFIER||310||693|app|protein_coding|CODING|FBtr0301057||1);DOWNSTREAM(MODIFIER||310||382|app|protein_coding|CODING|FBtr0304661||1);DOWNSTREAM(MODIFIER||310||693|app|protein_coding|CODING|FBtr0334102||1);DOWNSTREAM(MODIFIER||310|…	Free Glucose	0.18644	0.2558	0.0763941
Free Glucose	histamine	1574	-0.36831	0.0194	FBgn0034725	2R:18291682-18296045	-0.45832	0.0033	3L_12199028_SNP	0.125	6.45368e-06	4.522e-07	0.00172414	SiteClass[FBgn0036266|CG5626|INTRON|0;FBgn0260941|app|DOWNSTREAM|310],TranscriptAnnot[DOWNSTREAM(MODIFIER||310||693|app|protein_coding|CODING|FBtr0301056||1);DOWNSTREAM(MODIFIER||310||693|app|protein_coding|CODING|FBtr0301057||1);DOWNSTREAM(MODIFIER||310||382|app|protein_coding|CODING|FBtr0304661||1);DOWNSTREAM(MODIFIER||310||693|app|protein_coding|CODING|FBtr0334102||1);DOWNSTREAM(MODIFIER||310|…	Free Glucose	-0.21296	0.193	0.0763941
Free Glucose	histamine	1574	-0.36831	0.0194	XLOC_017830	3L:15931447-15935182	0.49162	0.0015	3L_12199028_SNP	0.125	6.45368e-06	0.0003627	0.00172414	SiteClass[FBgn0036266|CG5626|INTRON|0;FBgn0260941|app|DOWNSTREAM|310],TranscriptAnnot[DOWNSTREAM(MODIFIER||310||693|app|protein_coding|CODING|FBtr0301056||1);DOWNSTREAM(MODIFIER||310||693|app|protein_coding|CODING|FBtr0301057||1);DOWNSTREAM(MODIFIER||310||382|app|protein_coding|CODING|FBtr0304661||1);DOWNSTREAM(MODIFIER||310||693|app|protein_coding|CODING|FBtr0334102||1);DOWNSTREAM(MODIFIER||310|…	Free Glucose	-0.12611	0.4443	0.0763941
Free Glucose	histamine	1574	-0.36831	0.0194	FBgn0031150	X:20924990-20953418	-0.50013	0.0012	3L_12199028_SNP	0.125	6.45368e-06	4.365e-05	0.00172414	SiteClass[FBgn0036266|CG5626|INTRON|0;FBgn0260941|app|DOWNSTREAM|310],TranscriptAnnot[DOWNSTREAM(MODIFIER||310||693|app|protein_coding|CODING|FBtr0301056||1);DOWNSTREAM(MODIFIER||310||693|app|protein_coding|CODING|FBtr0301057||1);DOWNSTREAM(MODIFIER||310||382|app|protein_coding|CODING|FBtr0304661||1);DOWNSTREAM(MODIFIER||310||693|app|protein_coding|CODING|FBtr0334102||1);DOWNSTREAM(MODIFIER||310|…	Free Glucose	0.17166	0.2961	0.0763941
Free Glucose	histamine	1574	-0.36831	0.0194	FBgn0036266	3L:12197223-12199122	-0.45377	0.0037	3L_12199028_SNP	0.125	6.45368e-06	0.0007324	0.00172414	SiteClass[FBgn0036266|CG5626|INTRON|0;FBgn0260941|app|DOWNSTREAM|310],TranscriptAnnot[DOWNSTREAM(MODIFIER||310||693|app|protein_coding|CODING|FBtr0301056||1);DOWNSTREAM(MODIFIER||310||693|app|protein_coding|CODING|FBtr0301057||1);DOWNSTREAM(MODIFIER||310||382|app|protein_coding|CODING|FBtr0304661||1);DOWNSTREAM(MODIFIER||310||693|app|protein_coding|CODING|FBtr0334102||1);DOWNSTREAM(MODIFIER||310|…	Free Glucose	0.11356	0.4912	0.0763941
Free Glucose	1-palmitoleoyl-2-oleoyl-glycerol (16:1/18:1)*	52632	0.32645	0.0398	FBgn0031042	X:19512852-19515278	-0.55385	0.0003	3L_12874903_INS	0.2051	9.78001e-06	0.001043	0.00121951	SiteClass[|||],TranscriptAnnot[INTERGENIC(MODIFIER||||||||||1)]	Free Glucose	-0.32348	0.0446	0.459059
Free Glucose	glycerol 3-phosphate	43847	0.38386	0.0145	FBgn0058178	3LHet:1181140-1396811	-0.47996	0.002	3L_133789_SNP	0.359	6.05981e-06	0.0001532	0.000235849	SiteClass[FBgn0020386|Pdk1|INTRON|0],TranscriptAnnot[INTRON(MODIFIER||||836|Pdk1|protein_coding|CODING|FBtr0072464|1|1);INTRON(MODIFIER||||836|Pdk1|protein_coding|CODING|FBtr0333218|1|1);INTRON(MODIFIER||||755|Pdk1|protein_coding|CODING|FBtr0072466|1|1);INTRON(MODIFIER||||755|Pdk1|protein_coding|CODING|FBtr0072467|1|1);INTRON(MODIFIER||||755|Pdk1|protein_coding|CODING|FBtr0072465|1|1);INTRON(MODI…	Free Glucose	-0.13806	0.402	0.0298858
Free Glucose	flavin mononucleotide (FMN)	15797	0.40375	0.0098	FBgn0039004	3R:18516329-18520494	0.46741	0.0027	3L_14178029_SNP	0.2857	2.98065e-06	0.001639	0.00217391	SiteClass[|||],TranscriptAnnot[INTERGENIC(MODIFIER||||||||||1)]	Free Glucose	-0.1998	0.2227	0.494715
Free Glucose	flavin mononucleotide (FMN)	15797	0.40375	0.0098	FBgn0024191	2L:5721051-5723944	0.51903	0.0007	3L_14178029_SNP	0.2857	2.98065e-06	0.0007668	0.00217391	SiteClass[|||],TranscriptAnnot[INTERGENIC(MODIFIER||||||||||1)]	Free Glucose	-0.0334	0.84	0.494715
Free Glucose	flavin mononucleotide (FMN)	15797	0.40375	0.0098	FBgn0037669	3R:5083449-5084223	0.47834	0.0021	3L_14178029_SNP	0.2857	2.98065e-06	0.001888	0.00217391	SiteClass[|||],TranscriptAnnot[INTERGENIC(MODIFIER||||||||||1)]	Free Glucose	-0.2081	0.2036	0.494715
Free Glucose	3-hydroxypropanoate	1556	-0.34071	0.0314	FBgn0028519	2L:14027001-14029368	-0.52773	0.0006	3L_1515332_SNP	0.1316	9.2681e-06	0.0002983	0.000431034	SiteClass[FBgn0011204|cue|INTRON|0;FBgn0261243|Psa|INTRON|0],TranscriptAnnot[INTRON(MODIFIER||||866|Psa|protein_coding|CODING|FBtr0072697|1|1);INTRON(MODIFIER||||644|cue|protein_coding|CODING|FBtr0072706|1|1)]	Free Glucose	0.31073	0.0542	0.435827
Free Glucose	1-palmitoleoyl-2-oleoyl-glycerol (16:1/18:1)*	52632	0.32645	0.0398	FBgn0031936	2L:7719847-7722823	-0.56721	0.0002	3L_1534283_DEL	0.3158	5.92524e-06	0.0004207	0.00121951	SiteClass[FBgn0035227|CG12090|UPSTREAM|250;FBgn0035228|CG12091|DOWNSTREAM|645],TranscriptAnnot[UPSTREAM(MODIFIER||250||1544|CG12090|protein_coding|CODING|FBtr0072703||1);UPSTREAM(MODIFIER||250||1471|CG12090|protein_coding|CODING|FBtr0072704||1);UPSTREAM(MODIFIER||250||1472|CG12090|protein_coding|CODING|FBtr0072705||1);UPSTREAM(MODIFIER||250||1511|CG12090|protein_coding|CODING|FBtr0333401||1);UPST…	Free Glucose	-0.23664	0.1469	0.260513
Free Glucose	flavin mononucleotide (FMN)	15797	0.40375	0.0098	FBgn0037669	3R:5083449-5084223	0.47834	0.0021	3L_15686453_SNP	0.4	9.41241e-07	0.0008402	0.00217391	SiteClass[|||],TranscriptAnnot[INTERGENIC(MODIFIER||||||||||1)]	Free Glucose	-0.2081	0.2036	0.0432872
Free Glucose	flavin mononucleotide (FMN)	15797	0.40375	0.0098	FBgn0024191	2L:5721051-5723944	0.51903	0.0007	3L_15686453_SNP	0.4	9.41241e-07	0.0005347	0.00217391	SiteClass[|||],TranscriptAnnot[INTERGENIC(MODIFIER||||||||||1)]	Free Glucose	-0.0334	0.84	0.0432872
Free Glucose	flavin mononucleotide (FMN)	15797	0.40375	0.0098	FBgn0024191	2L:5721051-5723944	0.51903	0.0007	3L_15686455_SNP	0.4167	5.50014e-07	0.0009942	0.00217391	SiteClass[|||],TranscriptAnnot[INTERGENIC(MODIFIER||||||||||1)]	Free Glucose	-0.0334	0.84	0.0664444
Free Glucose	flavin mononucleotide (FMN)	15797	0.40375	0.0098	FBgn0037669	3R:5083449-5084223	0.47834	0.0021	3L_15686455_SNP	0.4167	5.50014e-07	0.001082	0.00217391	SiteClass[|||],TranscriptAnnot[INTERGENIC(MODIFIER||||||||||1)]	Free Glucose	-0.2081	0.2036	0.0664444
Free Glucose	flavin mononucleotide (FMN)	15797	0.40375	0.0098	FBgn0024191	2L:5721051-5723944	0.51903	0.0007	3L_15686460_SNP	0.4286	4.34358e-07	0.001655	0.00217391	SiteClass[|||],TranscriptAnnot[INTERGENIC(MODIFIER||||||||||1)]	Free Glucose	-0.0334	0.84	0.0547718
Free Glucose	flavin mononucleotide (FMN)	15797	0.40375	0.0098	FBgn0037669	3R:5083449-5084223	0.47834	0.0021	3L_15686460_SNP	0.4286	4.34358e-07	0.001692	0.00217391	SiteClass[|||],TranscriptAnnot[INTERGENIC(MODIFIER||||||||||1)]	Free Glucose	-0.2081	0.2036	0.0547718
Free Glucose	isomaltose	39777	0.56848	0.0001	FBgn0259228	X:6674823-6697626	0.46093	0.0031	3L_16036929_DEL	0.1538	3.98198e-06	0.001646	0.00263158	SiteClass[FBgn0260635|th|INTRON|0],TranscriptAnnot[INTRON(MODIFIER||||438|th|protein_coding|CODING|FBtr0075500|1|1);INTRON(MODIFIER||||438|th|protein_coding|CODING|FBtr0075499|1|1);INTRON(MODIFIER||||438|th|protein_coding|CODING|FBtr0333619|1|1);INTRON(MODIFIER||||438|th|protein_coding|CODING|FBtr0333618|1|1)]	Free Glucose	0.06943	0.6745	0.0898969
Free Glucose	isomaltose	39777	0.56848	0.0001	XLOC_027796	U:8483039-8483603	-0.47247	0.0024	3L_16670982_SNP	0.3611	7.05843e-07	0.001157	0.00263158	SiteClass[FBgn0063485|Lasp|UTR_3_PRIME|0;FBgn0264605|CG43954|SYNONYMOUS_CODING|0],TranscriptAnnot[SYNONYMOUS_CODING(LOW|SILENT|ccG/ccT|P97|118|CG43954|protein_coding|CODING|FBtr0333628|6|1);UTR_3_PRIME(MODIFIER||297||657|Lasp|protein_coding|CODING|FBtr0100145|7|1);UTR_3_PRIME(MODIFIER||297||504|Lasp|protein_coding|CODING|FBtr0075350|7|1);UTR_3_PRIME(MODIFIER||297||636|Lasp|protein_coding|CODING|F…	Free Glucose	-0.23926	0.1424	0.00935778
Free Glucose	isomaltose	39777	0.56848	0.0001	FBgn0036428	3L:14534037-14544075	0.5915	<.0001	3L_16670982_SNP	0.3611	7.05843e-07	2.746e-06	0.00263158	SiteClass[FBgn0063485|Lasp|UTR_3_PRIME|0;FBgn0264605|CG43954|SYNONYMOUS_CODING|0],TranscriptAnnot[SYNONYMOUS_CODING(LOW|SILENT|ccG/ccT|P97|118|CG43954|protein_coding|CODING|FBtr0333628|6|1);UTR_3_PRIME(MODIFIER||297||657|Lasp|protein_coding|CODING|FBtr0100145|7|1);UTR_3_PRIME(MODIFIER||297||504|Lasp|protein_coding|CODING|FBtr0075350|7|1);UTR_3_PRIME(MODIFIER||297||636|Lasp|protein_coding|CODING|F…	Free Glucose	0.3917	0.0137	0.00935778
Free Glucose	isomaltose	39777	0.56848	0.0001	FBgn0043791	3R:5320523-5322445	0.53502	0.0004	3L_16670982_SNP	0.3611	7.05843e-07	0.0008133	0.00263158	SiteClass[FBgn0063485|Lasp|UTR_3_PRIME|0;FBgn0264605|CG43954|SYNONYMOUS_CODING|0],TranscriptAnnot[SYNONYMOUS_CODING(LOW|SILENT|ccG/ccT|P97|118|CG43954|protein_coding|CODING|FBtr0333628|6|1);UTR_3_PRIME(MODIFIER||297||657|Lasp|protein_coding|CODING|FBtr0100145|7|1);UTR_3_PRIME(MODIFIER||297||504|Lasp|protein_coding|CODING|FBtr0075350|7|1);UTR_3_PRIME(MODIFIER||297||636|Lasp|protein_coding|CODING|F…	Free Glucose	0.14717	0.3713	0.00935778
Free Glucose	isomaltose	39777	0.56848	0.0001	FBgn0039114	3R:19589579-19592384	0.53684	0.0004	3L_16670982_SNP	0.3611	7.05843e-07	0.002607	0.00263158	SiteClass[FBgn0063485|Lasp|UTR_3_PRIME|0;FBgn0264605|CG43954|SYNONYMOUS_CODING|0],TranscriptAnnot[SYNONYMOUS_CODING(LOW|SILENT|ccG/ccT|P97|118|CG43954|protein_coding|CODING|FBtr0333628|6|1);UTR_3_PRIME(MODIFIER||297||657|Lasp|protein_coding|CODING|FBtr0100145|7|1);UTR_3_PRIME(MODIFIER||297||504|Lasp|protein_coding|CODING|FBtr0075350|7|1);UTR_3_PRIME(MODIFIER||297||636|Lasp|protein_coding|CODING|F…	Free Glucose	-0.03927	0.8124	0.00935778
Free Glucose	isomaltose	39777	0.56848	0.0001	FBgn0000406	2L:16788774-16790721	0.52105	0.0007	3L_16670982_SNP	0.3611	7.05843e-07	5.051e-05	0.00263158	SiteClass[FBgn0063485|Lasp|UTR_3_PRIME|0;FBgn0264605|CG43954|SYNONYMOUS_CODING|0],TranscriptAnnot[SYNONYMOUS_CODING(LOW|SILENT|ccG/ccT|P97|118|CG43954|protein_coding|CODING|FBtr0333628|6|1);UTR_3_PRIME(MODIFIER||297||657|Lasp|protein_coding|CODING|FBtr0100145|7|1);UTR_3_PRIME(MODIFIER||297||504|Lasp|protein_coding|CODING|FBtr0075350|7|1);UTR_3_PRIME(MODIFIER||297||636|Lasp|protein_coding|CODING|F…	Free Glucose	0.09555	0.5629	0.00935778
Free Glucose	glucose	48152	0.57467	0.0001	FBgn0000406	2L:16788774-16790721	0.56943	0.0002	3L_16670982_SNP	0.3611	9.19741e-06	5.051e-05	0.00555556	SiteClass[FBgn0063485|Lasp|UTR_3_PRIME|0;FBgn0264605|CG43954|SYNONYMOUS_CODING|0],TranscriptAnnot[SYNONYMOUS_CODING(LOW|SILENT|ccG/ccT|P97|118|CG43954|protein_coding|CODING|FBtr0333628|6|1);UTR_3_PRIME(MODIFIER||297||657|Lasp|protein_coding|CODING|FBtr0100145|7|1);UTR_3_PRIME(MODIFIER||297||504|Lasp|protein_coding|CODING|FBtr0075350|7|1);UTR_3_PRIME(MODIFIER||297||636|Lasp|protein_coding|CODING|F…	Free Glucose	0.09555	0.5629	0.00935778
Free Glucose	isomaltose	39777	0.56848	0.0001	FBgn0031888	2L:7069536-7084635	-0.48057	0.002	3L_16670982_SNP	0.3611	7.05843e-07	0.002253	0.00263158	SiteClass[FBgn0063485|Lasp|UTR_3_PRIME|0;FBgn0264605|CG43954|SYNONYMOUS_CODING|0],TranscriptAnnot[SYNONYMOUS_CODING(LOW|SILENT|ccG/ccT|P97|118|CG43954|protein_coding|CODING|FBtr0333628|6|1);UTR_3_PRIME(MODIFIER||297||657|Lasp|protein_coding|CODING|FBtr0100145|7|1);UTR_3_PRIME(MODIFIER||297||504|Lasp|protein_coding|CODING|FBtr0075350|7|1);UTR_3_PRIME(MODIFIER||297||636|Lasp|protein_coding|CODING|F…	Free Glucose	-0.01822	0.9123	0.00935778
Free Glucose	panose	37284	0.39606	0.0114	FBgn0000406	2L:16788774-16790721	0.47652	0.0022	3L_16670982_SNP	0.3611	3.47066e-06	5.051e-05	0.00138889	SiteClass[FBgn0063485|Lasp|UTR_3_PRIME|0;FBgn0264605|CG43954|SYNONYMOUS_CODING|0],TranscriptAnnot[SYNONYMOUS_CODING(LOW|SILENT|ccG/ccT|P97|118|CG43954|protein_coding|CODING|FBtr0333628|6|1);UTR_3_PRIME(MODIFIER||297||657|Lasp|protein_coding|CODING|FBtr0100145|7|1);UTR_3_PRIME(MODIFIER||297||504|Lasp|protein_coding|CODING|FBtr0075350|7|1);UTR_3_PRIME(MODIFIER||297||636|Lasp|protein_coding|CODING|F…	Free Glucose	0.09555	0.5629	0.00935778
Free Glucose	glucose	48152	0.57467	0.0001	FBgn0043791	3R:5320523-5322445	0.51437	0.0008	3L_16670982_SNP	0.3611	9.19741e-06	0.0008133	0.00555556	SiteClass[FBgn0063485|Lasp|UTR_3_PRIME|0;FBgn0264605|CG43954|SYNONYMOUS_CODING|0],TranscriptAnnot[SYNONYMOUS_CODING(LOW|SILENT|ccG/ccT|P97|118|CG43954|protein_coding|CODING|FBtr0333628|6|1);UTR_3_PRIME(MODIFIER||297||657|Lasp|protein_coding|CODING|FBtr0100145|7|1);UTR_3_PRIME(MODIFIER||297||504|Lasp|protein_coding|CODING|FBtr0075350|7|1);UTR_3_PRIME(MODIFIER||297||636|Lasp|protein_coding|CODING|F…	Free Glucose	0.14717	0.3713	0.00935778
Free Glucose	panose	37284	0.39606	0.0114	FBgn0036428	3L:14534037-14544075	0.53117	0.0005	3L_16670982_SNP	0.3611	3.47066e-06	2.746e-06	0.00138889	SiteClass[FBgn0063485|Lasp|UTR_3_PRIME|0;FBgn0264605|CG43954|SYNONYMOUS_CODING|0],TranscriptAnnot[SYNONYMOUS_CODING(LOW|SILENT|ccG/ccT|P97|118|CG43954|protein_coding|CODING|FBtr0333628|6|1);UTR_3_PRIME(MODIFIER||297||657|Lasp|protein_coding|CODING|FBtr0100145|7|1);UTR_3_PRIME(MODIFIER||297||504|Lasp|protein_coding|CODING|FBtr0075350|7|1);UTR_3_PRIME(MODIFIER||297||636|Lasp|protein_coding|CODING|F…	Free Glucose	0.3917	0.0137	0.00935778
Free Glucose	glucose	48152	0.57467	0.0001	FBgn0039114	3R:19589579-19592384	0.60992	<.0001	3L_16670982_SNP	0.3611	9.19741e-06	0.002607	0.00555556	SiteClass[FBgn0063485|Lasp|UTR_3_PRIME|0;FBgn0264605|CG43954|SYNONYMOUS_CODING|0],TranscriptAnnot[SYNONYMOUS_CODING(LOW|SILENT|ccG/ccT|P97|118|CG43954|protein_coding|CODING|FBtr0333628|6|1);UTR_3_PRIME(MODIFIER||297||657|Lasp|protein_coding|CODING|FBtr0100145|7|1);UTR_3_PRIME(MODIFIER||297||504|Lasp|protein_coding|CODING|FBtr0075350|7|1);UTR_3_PRIME(MODIFIER||297||636|Lasp|protein_coding|CODING|F…	Free Glucose	-0.03927	0.8124	0.00935778
Free Glucose	glucose	48152	0.57467	0.0001	FBgn0036428	3L:14534037-14544075	0.62186	<.0001	3L_16670982_SNP	0.3611	9.19741e-06	2.746e-06	0.00555556	SiteClass[FBgn0063485|Lasp|UTR_3_PRIME|0;FBgn0264605|CG43954|SYNONYMOUS_CODING|0],TranscriptAnnot[SYNONYMOUS_CODING(LOW|SILENT|ccG/ccT|P97|118|CG43954|protein_coding|CODING|FBtr0333628|6|1);UTR_3_PRIME(MODIFIER||297||657|Lasp|protein_coding|CODING|FBtr0100145|7|1);UTR_3_PRIME(MODIFIER||297||504|Lasp|protein_coding|CODING|FBtr0075350|7|1);UTR_3_PRIME(MODIFIER||297||636|Lasp|protein_coding|CODING|F…	Free Glucose	0.3917	0.0137	0.00935778
Free Glucose	panose	37284	0.39606	0.0114	FBgn0004587	3R:9487033-9492613	0.48826	0.0016	3L_16670982_SNP	0.3611	3.47066e-06	0.001359	0.00138889	SiteClass[FBgn0063485|Lasp|UTR_3_PRIME|0;FBgn0264605|CG43954|SYNONYMOUS_CODING|0],TranscriptAnnot[SYNONYMOUS_CODING(LOW|SILENT|ccG/ccT|P97|118|CG43954|protein_coding|CODING|FBtr0333628|6|1);UTR_3_PRIME(MODIFIER||297||657|Lasp|protein_coding|CODING|FBtr0100145|7|1);UTR_3_PRIME(MODIFIER||297||504|Lasp|protein_coding|CODING|FBtr0075350|7|1);UTR_3_PRIME(MODIFIER||297||636|Lasp|protein_coding|CODING|F…	Free Glucose	0.12874	0.4347	0.00935778
Free Glucose	glucose	48152	0.57467	0.0001	FBgn0085488	2R:12712169-12714153	0.46498	0.0029	3L_16670982_SNP	0.3611	9.19741e-06	0.00124	0.00555556	SiteClass[FBgn0063485|Lasp|UTR_3_PRIME|0;FBgn0264605|CG43954|SYNONYMOUS_CODING|0],TranscriptAnnot[SYNONYMOUS_CODING(LOW|SILENT|ccG/ccT|P97|118|CG43954|protein_coding|CODING|FBtr0333628|6|1);UTR_3_PRIME(MODIFIER||297||657|Lasp|protein_coding|CODING|FBtr0100145|7|1);UTR_3_PRIME(MODIFIER||297||504|Lasp|protein_coding|CODING|FBtr0075350|7|1);UTR_3_PRIME(MODIFIER||297||636|Lasp|protein_coding|CODING|F…	Free Glucose	-0.08219	0.6189	0.00935778
Free Glucose	panose	37284	0.39606	0.0114	XLOC_027796	U:8483039-8483603	-0.62126	<.0001	3L_16670982_SNP	0.3611	3.47066e-06	0.001157	0.00138889	SiteClass[FBgn0063485|Lasp|UTR_3_PRIME|0;FBgn0264605|CG43954|SYNONYMOUS_CODING|0],TranscriptAnnot[SYNONYMOUS_CODING(LOW|SILENT|ccG/ccT|P97|118|CG43954|protein_coding|CODING|FBtr0333628|6|1);UTR_3_PRIME(MODIFIER||297||657|Lasp|protein_coding|CODING|FBtr0100145|7|1);UTR_3_PRIME(MODIFIER||297||504|Lasp|protein_coding|CODING|FBtr0075350|7|1);UTR_3_PRIME(MODIFIER||297||636|Lasp|protein_coding|CODING|F…	Free Glucose	-0.23926	0.1424	0.00935778
Free Glucose	glucose	48152	0.57467	0.0001	XLOC_003019	2L:22355317-22356221	-0.49636	0.0013	3L_16670982_SNP	0.3611	9.19741e-06	0.00445	0.00555556	SiteClass[FBgn0063485|Lasp|UTR_3_PRIME|0;FBgn0264605|CG43954|SYNONYMOUS_CODING|0],TranscriptAnnot[SYNONYMOUS_CODING(LOW|SILENT|ccG/ccT|P97|118|CG43954|protein_coding|CODING|FBtr0333628|6|1);UTR_3_PRIME(MODIFIER||297||657|Lasp|protein_coding|CODING|FBtr0100145|7|1);UTR_3_PRIME(MODIFIER||297||504|Lasp|protein_coding|CODING|FBtr0075350|7|1);UTR_3_PRIME(MODIFIER||297||636|Lasp|protein_coding|CODING|F…	Free Glucose	-0.162	0.3245	0.00935778
Free Glucose	glucose	48152	0.57467	0.0001	FBgn0031187	X:21857639-21871982	0.48057	0.002	3L_16670982_SNP	0.3611	9.19741e-06	0.003175	0.00555556	SiteClass[FBgn0063485|Lasp|UTR_3_PRIME|0;FBgn0264605|CG43954|SYNONYMOUS_CODING|0],TranscriptAnnot[SYNONYMOUS_CODING(LOW|SILENT|ccG/ccT|P97|118|CG43954|protein_coding|CODING|FBtr0333628|6|1);UTR_3_PRIME(MODIFIER||297||657|Lasp|protein_coding|CODING|FBtr0100145|7|1);UTR_3_PRIME(MODIFIER||297||504|Lasp|protein_coding|CODING|FBtr0075350|7|1);UTR_3_PRIME(MODIFIER||297||636|Lasp|protein_coding|CODING|F…	Free Glucose	0.08664	0.6	0.00935778
Free Glucose	glucose	48152	0.57467	0.0001	FBgn0083972	2L:21096922-21098932	0.49413	0.0014	3L_16670982_SNP	0.3611	9.19741e-06	0.004176	0.00555556	SiteClass[FBgn0063485|Lasp|UTR_3_PRIME|0;FBgn0264605|CG43954|SYNONYMOUS_CODING|0],TranscriptAnnot[SYNONYMOUS_CODING(LOW|SILENT|ccG/ccT|P97|118|CG43954|protein_coding|CODING|FBtr0333628|6|1);UTR_3_PRIME(MODIFIER||297||657|Lasp|protein_coding|CODING|FBtr0100145|7|1);UTR_3_PRIME(MODIFIER||297||504|Lasp|protein_coding|CODING|FBtr0075350|7|1);UTR_3_PRIME(MODIFIER||297||636|Lasp|protein_coding|CODING|F…	Free Glucose	0.41154	0.0092	0.00935778
Free Glucose	glucose	48152	0.57467	0.0001	FBgn0263199	3L:8975312-8979191	0.5664	0.0002	3L_16670982_SNP	0.3611	9.19741e-06	0.004384	0.00555556	SiteClass[FBgn0063485|Lasp|UTR_3_PRIME|0;FBgn0264605|CG43954|SYNONYMOUS_CODING|0],TranscriptAnnot[SYNONYMOUS_CODING(LOW|SILENT|ccG/ccT|P97|118|CG43954|protein_coding|CODING|FBtr0333628|6|1);UTR_3_PRIME(MODIFIER||297||657|Lasp|protein_coding|CODING|FBtr0100145|7|1);UTR_3_PRIME(MODIFIER||297||504|Lasp|protein_coding|CODING|FBtr0075350|7|1);UTR_3_PRIME(MODIFIER||297||636|Lasp|protein_coding|CODING|F…	Free Glucose	0.05061	0.7596	0.00935778
Free Glucose	glucose	48152	0.57467	0.0001	FBgn0000536	X:16172361-16179651	-0.53259	0.0005	3L_16670982_SNP	0.3611	9.19741e-06	0.004604	0.00555556	SiteClass[FBgn0063485|Lasp|UTR_3_PRIME|0;FBgn0264605|CG43954|SYNONYMOUS_CODING|0],TranscriptAnnot[SYNONYMOUS_CODING(LOW|SILENT|ccG/ccT|P97|118|CG43954|protein_coding|CODING|FBtr0333628|6|1);UTR_3_PRIME(MODIFIER||297||657|Lasp|protein_coding|CODING|FBtr0100145|7|1);UTR_3_PRIME(MODIFIER||297||504|Lasp|protein_coding|CODING|FBtr0075350|7|1);UTR_3_PRIME(MODIFIER||297||636|Lasp|protein_coding|CODING|F…	Free Glucose	-0.36498	0.0223	0.00935778
Free Glucose	glucose	48152	0.57467	0.0001	FBgn0031910	2L:7410909-7412229	-0.49777	0.0013	3L_16670982_SNP	0.3611	9.19741e-06	0.003283	0.00555556	SiteClass[FBgn0063485|Lasp|UTR_3_PRIME|0;FBgn0264605|CG43954|SYNONYMOUS_CODING|0],TranscriptAnnot[SYNONYMOUS_CODING(LOW|SILENT|ccG/ccT|P97|118|CG43954|protein_coding|CODING|FBtr0333628|6|1);UTR_3_PRIME(MODIFIER||297||657|Lasp|protein_coding|CODING|FBtr0100145|7|1);UTR_3_PRIME(MODIFIER||297||504|Lasp|protein_coding|CODING|FBtr0075350|7|1);UTR_3_PRIME(MODIFIER||297||636|Lasp|protein_coding|CODING|F…	Free Glucose	-0.18704	0.2542	0.00935778
Free Glucose	panose	37284	0.39606	0.0114	FBgn0033446	2R:5698479-5707558	0.47733	0.0021	3L_16670982_SNP	0.3611	3.47066e-06	0.0002451	0.00138889	SiteClass[FBgn0063485|Lasp|UTR_3_PRIME|0;FBgn0264605|CG43954|SYNONYMOUS_CODING|0],TranscriptAnnot[SYNONYMOUS_CODING(LOW|SILENT|ccG/ccT|P97|118|CG43954|protein_coding|CODING|FBtr0333628|6|1);UTR_3_PRIME(MODIFIER||297||657|Lasp|protein_coding|CODING|FBtr0100145|7|1);UTR_3_PRIME(MODIFIER||297||504|Lasp|protein_coding|CODING|FBtr0075350|7|1);UTR_3_PRIME(MODIFIER||297||636|Lasp|protein_coding|CODING|F…	Free Glucose	0.24474	0.1332	0.00935778
Free Glucose	isomaltose	39777	0.56848	0.0001	FBgn0000406	2L:16788774-16790721	0.52105	0.0007	3L_16707590_SNP	0.4571	7.70811e-06	0.001666	0.00263158	SiteClass[FBgn0000414|Dab|INTRON|0],TranscriptAnnot[INTRON(MODIFIER||||2047|Dab|protein_coding|CODING|FBtr0305084|1|1);INTRON(MODIFIER||||2200|Dab|protein_coding|CODING|FBtr0305085|1|1);INTRON(MODIFIER||||2336|Dab|protein_coding|CODING|FBtr0330190|1|1);INTRON(MODIFIER||||2224|Dab|protein_coding|CODING|FBtr0075318|1|1);INTRON(MODIFIER||||2071|Dab|protein_coding|CODING|FBtr0305086|1|1);INTRON(MODIF…	Free Glucose	0.09555	0.5629	0.00290115
Free Glucose	isomaltose	39777	0.56848	0.0001	FBgn0083972	2L:21096922-21098932	0.50182	0.0011	3L_16707590_SNP	0.4571	7.70811e-06	0.001282	0.00263158	SiteClass[FBgn0000414|Dab|INTRON|0],TranscriptAnnot[INTRON(MODIFIER||||2047|Dab|protein_coding|CODING|FBtr0305084|1|1);INTRON(MODIFIER||||2200|Dab|protein_coding|CODING|FBtr0305085|1|1);INTRON(MODIFIER||||2336|Dab|protein_coding|CODING|FBtr0330190|1|1);INTRON(MODIFIER||||2224|Dab|protein_coding|CODING|FBtr0075318|1|1);INTRON(MODIFIER||||2071|Dab|protein_coding|CODING|FBtr0305086|1|1);INTRON(MODIF…	Free Glucose	0.41154	0.0092	0.00290115
Free Glucose	isomaltose	39777	0.56848	0.0001	FBgn0039114	3R:19589579-19592384	0.53684	0.0004	3L_16707590_SNP	0.4571	7.70811e-06	0.0008256	0.00263158	SiteClass[FBgn0000414|Dab|INTRON|0],TranscriptAnnot[INTRON(MODIFIER||||2047|Dab|protein_coding|CODING|FBtr0305084|1|1);INTRON(MODIFIER||||2200|Dab|protein_coding|CODING|FBtr0305085|1|1);INTRON(MODIFIER||||2336|Dab|protein_coding|CODING|FBtr0330190|1|1);INTRON(MODIFIER||||2224|Dab|protein_coding|CODING|FBtr0075318|1|1);INTRON(MODIFIER||||2071|Dab|protein_coding|CODING|FBtr0305086|1|1);INTRON(MODIF…	Free Glucose	-0.03927	0.8124	0.00290115
Free Glucose	isomaltose	39777	0.56848	0.0001	FBgn0036428	3L:14534037-14544075	0.5915	<.0001	3L_16707590_SNP	0.4571	7.70811e-06	0.0002192	0.00263158	SiteClass[FBgn0000414|Dab|INTRON|0],TranscriptAnnot[INTRON(MODIFIER||||2047|Dab|protein_coding|CODING|FBtr0305084|1|1);INTRON(MODIFIER||||2200|Dab|protein_coding|CODING|FBtr0305085|1|1);INTRON(MODIFIER||||2336|Dab|protein_coding|CODING|FBtr0330190|1|1);INTRON(MODIFIER||||2224|Dab|protein_coding|CODING|FBtr0075318|1|1);INTRON(MODIFIER||||2071|Dab|protein_coding|CODING|FBtr0305086|1|1);INTRON(MODIF…	Free Glucose	0.3917	0.0137	0.00290115
Free Glucose	sucrose	1519	-0.41895	0.0071	FBgn0023000	3L:343378-346957	-0.49271	0.0014	3L_17185621_SNP	0.1053	3.32879e-06	0.0001364	0.00208333	SiteClass[FBgn0260943|Rbp6|INTRON|0],TranscriptAnnot[INTRON(MODIFIER||||369|Rbp6|protein_coding|CODING|FBtr0075285|3|1);INTRON(MODIFIER||||499|Rbp6|protein_coding|CODING|FBtr0113427|3|1);INTRON(MODIFIER||||371|Rbp6|protein_coding|CODING|FBtr0333861|3|1)]	Free Glucose	0.11377	0.4905	0.0602722
Free Glucose	sucrose	1519	-0.41895	0.0071	FBgn0023000	3L:343378-346957	-0.49271	0.0014	3L_17190234_DEL	0.1351	3.95257e-07	7.69e-06	0.00208333	SiteClass[FBgn0260943|Rbp6|INTRON|0],TranscriptAnnot[INTRON(MODIFIER||||369|Rbp6|protein_coding|CODING|FBtr0075285|3|1);INTRON(MODIFIER||||499|Rbp6|protein_coding|CODING|FBtr0113427|3|1);INTRON(MODIFIER||||371|Rbp6|protein_coding|CODING|FBtr0333861|3|1)]	Free Glucose	0.11377	0.4905	0.0708106
Free Glucose	3-hydroxypropanoate	1556	-0.34071	0.0314	FBgn0034963	2R:19924243-19925438	0.45587	0.0035	3L_18306745_SNP	0.1579	5.26401e-06	0.000297	0.000431034	SiteClass[|||],TranscriptAnnot[INTERGENIC(MODIFIER||||||||||1)]	Free Glucose	-0.20445	0.2118	0.283474
Free Glucose	3-hydroxypropanoate	1556	-0.34071	0.0314	FBgn0033913	2R:10107403-10118125	-0.4915	0.0015	3L_18306745_SNP	0.1579	5.26401e-06	0.0002222	0.000431034	SiteClass[|||],TranscriptAnnot[INTERGENIC(MODIFIER||||||||||1)]	Free Glucose	-0.04332	0.7934	0.283474
Free Glucose	kojibiose	21040	0.55872	0.0002	FBgn0043791	3R:5320523-5322445	0.60304	<.0001	3L_18339307_SNP	0.2368	1.22402e-06	0.00216	0.00357143	SiteClass[|||],TranscriptAnnot[INTERGENIC(MODIFIER||||||||||1)]	Free Glucose	0.14717	0.3713	0.065182
Free Glucose	kojibiose	21040	0.55872	0.0002	FBgn0025833	2R:12762229-12783157	0.55385	0.0003	3L_18339307_SNP	0.2368	1.22402e-06	0.0003406	0.00357143	SiteClass[|||],TranscriptAnnot[INTERGENIC(MODIFIER||||||||||1)]	Free Glucose	0.19717	0.2289	0.065182
Free Glucose	panose	37284	0.39606	0.0114	FBgn0031888	2L:7069536-7084635	-0.52692	0.0006	3L_18642768_SNP	0.1026	3.23406e-06	0.0001735	0.00138889	SiteClass[FBgn0036801|MYPT-75D|INTRON|0],TranscriptAnnot[INTRON(MODIFIER||||741|MYPT-75D|protein_coding|CODING|FBtr0075049|2|1);INTRON(MODIFIER||||635|MYPT-75D|protein_coding|CODING|FBtr0331420|2|1);INTRON(MODIFIER||||741|MYPT-75D|protein_coding|CODING|FBtr0331421|1|1)]	Free Glucose	-0.01822	0.9123	0.226072
Free Glucose	1-palmitoleoyl-2-oleoyl-glycerol (16:1/18:1)*	52632	0.32645	0.0398	FBgn0045038	2L:7864642-7871432	-0.55587	0.0002	3L_19099319_SNP	0.1667	9.44779e-06	0.0009824	0.00121951	SiteClass[FBgn0036851|CG14082|DOWNSTREAM|624],TranscriptAnnot[UTR_3_PRIME(MODIFIER||1056||473|CG14082|protein_coding|CODING|FBtr0346533|5|1);DOWNSTREAM(MODIFIER||624||473|CG14082|protein_coding|CODING|FBtr0330091||1);DOWNSTREAM(MODIFIER||624||530|CG14082|protein_coding|CODING|FBtr0330092||1)]	Free Glucose	-0.07409	0.654	0.746262
Free Glucose	1-palmitoleoyl-2-oleoyl-glycerol (16:1/18:1)*	52632	0.32645	0.0398	FBgn0045038	2L:7864642-7871432	-0.55587	0.0002	3L_19099651_SNP	0.1944	5.41147e-07	0.0005135	0.00121951	SiteClass[FBgn0036851|CG14082|DOWNSTREAM|292],TranscriptAnnot[UTR_3_PRIME(MODIFIER||724||473|CG14082|protein_coding|CODING|FBtr0346533|5|1);DOWNSTREAM(MODIFIER||292||473|CG14082|protein_coding|CODING|FBtr0330091||1);DOWNSTREAM(MODIFIER||292||530|CG14082|protein_coding|CODING|FBtr0330092||1)]	Free Glucose	-0.07409	0.654	0.773554
Free Glucose	1-palmitoleoyl-2-oleoyl-glycerol (16:1/18:1)*	52632	0.32645	0.0398	FBgn0031936	2L:7719847-7722823	-0.56721	0.0002	3L_19099651_SNP	0.1944	5.41147e-07	0.0004518	0.00121951	SiteClass[FBgn0036851|CG14082|DOWNSTREAM|292],TranscriptAnnot[UTR_3_PRIME(MODIFIER||724||473|CG14082|protein_coding|CODING|FBtr0346533|5|1);DOWNSTREAM(MODIFIER||292||473|CG14082|protein_coding|CODING|FBtr0330091||1);DOWNSTREAM(MODIFIER||292||530|CG14082|protein_coding|CODING|FBtr0330092||1)]	Free Glucose	-0.23664	0.1469	0.773554
Free Glucose	maltopentaose	35163	0.38668	0.0137	FBgn0038461	3R:12816056-12817600	-0.46032	0.0032	3L_19391820_DEL	0.4722	2.32086e-06	0.0003351	0.0015625	SiteClass[FBgn0052206|CG32206|INTRON|0],TranscriptAnnot[INTRON(MODIFIER||||1260|CG32206|protein_coding|CODING|FBtr0089796|1|1);INTRON(MODIFIER||||1278|CG32206|protein_coding|CODING|FBtr0331182|1|1)]	Free Glucose	-0.04777	0.7727	0.0162836
Free Glucose	propionylcarnitine	32452	-0.34747	0.028	FBgn0040732	2R:15387800-15388923	-0.4749	0.0023	3L_1997674_SNP	0.1053	3.3047e-07	5.236e-05	0.0015625	SiteClass[|||],TranscriptAnnot[INTERGENIC(MODIFIER||||||||||1)]	Free Glucose	0.32834	0.0413	0.177243
Free Glucose	propionylcarnitine	32452	-0.34747	0.028	FBgn0035906	3L:8514529-8516601	-0.47206	0.0024	3L_1997674_SNP	0.1053	3.3047e-07	0.0005541	0.0015625	SiteClass[|||],TranscriptAnnot[INTERGENIC(MODIFIER||||||||||1)]	Free Glucose	0.09514	0.5645	0.177243
Free Glucose	propionylcarnitine	32452	-0.34747	0.028	XLOC_016571	3L:7252064-7253515	0.49231	0.0015	3L_1997674_SNP	0.1053	3.3047e-07	0.0001721	0.0015625	SiteClass[|||],TranscriptAnnot[INTERGENIC(MODIFIER||||||||||1)]	Free Glucose	-0.06579	0.6907	0.177243
Free Glucose	propionylcarnitine	32452	-0.34747	0.028	FBgn0037090	3L:21494521-21497059	-0.46579	0.0028	3L_1997674_SNP	0.1053	3.3047e-07	0.00113	0.0015625	SiteClass[|||],TranscriptAnnot[INTERGENIC(MODIFIER||||||||||1)]	Free Glucose	0.06619	0.6889	0.177243
Free Glucose	sucrose	1519	-0.41895	0.0071	FBgn0030524	X:13684371-13685144	0.50142	0.0011	3L_21820636_SNP	0.3243	9.15419e-06	1.325e-05	0.00208333	SiteClass[FBgn0037135|CG7414|UTR_3_PRIME|0;FBgn0052448|CG32448|DOWNSTREAM|238],TranscriptAnnot[UTR_3_PRIME(MODIFIER||599||555|CG7414|protein_coding|CODING|FBtr0303245|4|1);UTR_3_PRIME(MODIFIER||599||555|CG7414|protein_coding|CODING|FBtr0303247|4|1);UTR_3_PRIME(MODIFIER||9||638|CG7414|protein_coding|CODING|FBtr0303246|4|1);UTR_3_PRIME(MODIFIER||9||638|CG7414|protein_coding|CODING|FBtr0078441|4|1);…	Free Glucose	-0.36336	0.023	0.335549
Free Glucose	histamine	1574	-0.36831	0.0194	FBgn0031150	X:20924990-20953418	-0.50013	0.0012	3L_2297091_SNP	0.175	2.10332e-06	0.0001569	0.00172414	SiteClass[FBgn0264002|MsR2|INTRON|0],TranscriptAnnot[INTRON(MODIFIER||||488|MsR2|protein_coding|CODING|FBtr0330358|1|1);INTRON(MODIFIER||||488|MsR2|protein_coding|CODING|FBtr0330359|1|1);INTRON(MODIFIER||||647|MsR2|protein_coding|CODING|FBtr0330360|1|1)]	Free Glucose	0.17166	0.2961	0.347529
Free Glucose	histamine	1574	-0.36831	0.0194	FBgn0013469	3L:10974271-11002288	0.47118	0.0025	3L_2297091_SNP	0.175	2.10332e-06	0.0005023	0.00172414	SiteClass[FBgn0264002|MsR2|INTRON|0],TranscriptAnnot[INTRON(MODIFIER||||488|MsR2|protein_coding|CODING|FBtr0330358|1|1);INTRON(MODIFIER||||488|MsR2|protein_coding|CODING|FBtr0330359|1|1);INTRON(MODIFIER||||647|MsR2|protein_coding|CODING|FBtr0330360|1|1)]	Free Glucose	-0.18846	0.2506	0.347529
Free Glucose	glycerol 3-phosphate	43847	0.38386	0.0145	XLOC_019522	3LHet:2209286-2213303	-0.56012	0.0002	3L_2852550_SNP	0.1538	3.26979e-06	0.000207	0.000235849	SiteClass[FBgn0263392|CG43444|INTRON|0],TranscriptAnnot[INTRON(MODIFIER||||2866|CG43444|protein_coding|CODING|FBtr0333880|4|1);INTRON(MODIFIER||||2921|CG43444|protein_coding|CODING|FBtr0333881|4|1);INTRON(MODIFIER||||2860|CG43444|protein_coding|CODING|FBtr0309117|3|1);INTRON(MODIFIER||||2915|CG43444|protein_coding|CODING|FBtr0309118|3|1)]	Free Glucose	-0.00162	0.9922	0.623573
Free Glucose	histamine	1574	-0.36831	0.0194	FBgn0038830	3R:16649035-16649961	-0.50195	0.0011	3L_3007655_SNP	0.1538	1.62746e-06	0.0002225	0.00172414	SiteClass[FBgn0035385|FMRFaR|INTRON|0],TranscriptAnnot[INTRON(MODIFIER||||549|FMRFaR|protein_coding|CODING|FBtr0072980|1|1);INTRON(MODIFIER||||549|FMRFaR|protein_coding|CODING|FBtr0340706|1|1);INTRON(MODIFIER||||549|FMRFaR|protein_coding|CODING|FBtr0332085|1|1)]	Free Glucose	-0.00607	0.9707	0.12458
Free Glucose	3-hydroxypropanoate	1556	-0.34071	0.0314	FBgn0028519	2L:14027001-14029368	-0.52773	0.0006	3L_3144093_SNP	0.1795	5.45603e-06	6.296e-05	0.000431034	SiteClass[FBgn0035401|CG1291|SYNONYMOUS_CODING|0;FBgn0035400|CG11537|UPSTREAM|636],TranscriptAnnot[SYNONYMOUS_CODING(LOW|SILENT|gtT/gtC|V34|424|CG1291|protein_coding|CODING|FBtr0073023|1|1);UPSTREAM(MODIFIER||636||488|CG11537|protein_coding|CODING|FBtr0073115||1)]	Free Glucose	0.31073	0.0542	0.284894
Free Glucose	panose	37284	0.39606	0.0114	XLOC_025652	3R:21541227-21544104	-0.47854	0.0021	3L_4461708_SNP	0.2895	9.98317e-06	0.001074	0.00138889	SiteClass[FBgn0035548|CG15023|UPSTREAM|204],TranscriptAnnot[UPSTREAM(MODIFIER||337||169|CG15023|protein_coding|CODING|FBtr0290225||1);UPSTREAM(MODIFIER||337||168|CG15023|protein_coding|CODING|FBtr0331409||1);UPSTREAM(MODIFIER||204||169|CG15023|protein_coding|CODING|FBtr0346535||1);INTERGENIC(MODIFIER||||||||||1)]	Free Glucose	-0.40547	0.0104	0.141605
Free Glucose	panose	37284	0.39606	0.0114	FBgn0083972	2L:21096922-21098932	0.51883	0.0007	3L_4461708_SNP	0.2895	9.98317e-06	0.0005788	0.00138889	SiteClass[FBgn0035548|CG15023|UPSTREAM|204],TranscriptAnnot[UPSTREAM(MODIFIER||337||169|CG15023|protein_coding|CODING|FBtr0290225||1);UPSTREAM(MODIFIER||337||168|CG15023|protein_coding|CODING|FBtr0331409||1);UPSTREAM(MODIFIER||204||169|CG15023|protein_coding|CODING|FBtr0346535||1);INTERGENIC(MODIFIER||||||||||1)]	Free Glucose	0.41154	0.0092	0.141605
Free Glucose	panose	37284	0.39606	0.0114	FBgn0004587	3R:9487033-9492613	0.48826	0.0016	3L_4461708_SNP	0.2895	9.98317e-06	0.0002901	0.00138889	SiteClass[FBgn0035548|CG15023|UPSTREAM|204],TranscriptAnnot[UPSTREAM(MODIFIER||337||169|CG15023|protein_coding|CODING|FBtr0290225||1);UPSTREAM(MODIFIER||337||168|CG15023|protein_coding|CODING|FBtr0331409||1);UPSTREAM(MODIFIER||204||169|CG15023|protein_coding|CODING|FBtr0346535||1);INTERGENIC(MODIFIER||||||||||1)]	Free Glucose	0.12874	0.4347	0.141605
Free Glucose	maltopentaose	35163	0.38668	0.0137	XLOC_010508	2R:13691246-13705465	0.46741	0.0027	3L_5073149_SNP	0.3784	8.69012e-06	0.001297	0.0015625	SiteClass[FBgn0005775|Con|INTRON|0],TranscriptAnnot[INTRON(MODIFIER||||691|Con|protein_coding|CODING|FBtr0309972|1|1)]	Free Glucose	0.21862	0.1812	0.176978
Free Glucose	flavin mononucleotide (FMN)	15797	0.40375	0.0098	FBgn0038504	3R:13220921-13228237	0.45344	0.0037	3L_514084_SNP	0.1538	8.52804e-06	0.0003834	0.00217391	SiteClass[FBgn0001316|klar|INTRON|0],TranscriptAnnot[INTRON(MODIFIER||||2262|klar|protein_coding|CODING|FBtr0072565|2|1);INTRON(MODIFIER||||2045|klar|protein_coding|CODING|FBtr0110818|2|1);INTRON(MODIFIER||||1823|klar|protein_coding|CODING|FBtr0112808|2|1);INTRON(MODIFIER||||2272|klar|protein_coding|CODING|FBtr0333850|1|1)]	Free Glucose	-0.02874	0.8621	0.693283
Free Glucose	flavin mononucleotide (FMN)	15797	0.40375	0.0098	FBgn0085427	2L:8898786-8933594	-0.47652	0.0022	3L_514084_SNP	0.1538	8.52804e-06	0.0002565	0.00217391	SiteClass[FBgn0001316|klar|INTRON|0],TranscriptAnnot[INTRON(MODIFIER||||2262|klar|protein_coding|CODING|FBtr0072565|2|1);INTRON(MODIFIER||||2045|klar|protein_coding|CODING|FBtr0110818|2|1);INTRON(MODIFIER||||1823|klar|protein_coding|CODING|FBtr0112808|2|1);INTRON(MODIFIER||||2272|klar|protein_coding|CODING|FBtr0333850|1|1)]	Free Glucose	-0.10789	0.5132	0.693283
Free Glucose	flavin mononucleotide (FMN)	15797	0.40375	0.0098	FBgn0029105	2R:19845365-19849154	-0.48866	0.0016	3L_514084_SNP	0.1538	8.52804e-06	0.001457	0.00217391	SiteClass[FBgn0001316|klar|INTRON|0],TranscriptAnnot[INTRON(MODIFIER||||2262|klar|protein_coding|CODING|FBtr0072565|2|1);INTRON(MODIFIER||||2045|klar|protein_coding|CODING|FBtr0110818|2|1);INTRON(MODIFIER||||1823|klar|protein_coding|CODING|FBtr0112808|2|1);INTRON(MODIFIER||||2272|klar|protein_coding|CODING|FBtr0333850|1|1)]	Free Glucose	-0.12227	0.4584	0.693283
Free Glucose	flavin mononucleotide (FMN)	15797	0.40375	0.0098	FBgn0037669	3R:5083449-5084223	0.47834	0.0021	3L_514084_SNP	0.1538	8.52804e-06	0.001761	0.00217391	SiteClass[FBgn0001316|klar|INTRON|0],TranscriptAnnot[INTRON(MODIFIER||||2262|klar|protein_coding|CODING|FBtr0072565|2|1);INTRON(MODIFIER||||2045|klar|protein_coding|CODING|FBtr0110818|2|1);INTRON(MODIFIER||||1823|klar|protein_coding|CODING|FBtr0112808|2|1);INTRON(MODIFIER||||2272|klar|protein_coding|CODING|FBtr0333850|1|1)]	Free Glucose	-0.2081	0.2036	0.693283
Free Glucose	flavin mononucleotide (FMN)	15797	0.40375	0.0098	FBgn0030105	X:9110905-9111499	0.4664	0.0028	3L_514084_SNP	0.1538	8.52804e-06	0.001607	0.00217391	SiteClass[FBgn0001316|klar|INTRON|0],TranscriptAnnot[INTRON(MODIFIER||||2262|klar|protein_coding|CODING|FBtr0072565|2|1);INTRON(MODIFIER||||2045|klar|protein_coding|CODING|FBtr0110818|2|1);INTRON(MODIFIER||||1823|klar|protein_coding|CODING|FBtr0112808|2|1);INTRON(MODIFIER||||2272|klar|protein_coding|CODING|FBtr0333850|1|1)]	Free Glucose	0.02105	0.8988	0.693283
Free Glucose	flavin mononucleotide (FMN)	15797	0.40375	0.0098	FBgn0039004	3R:18516329-18520494	0.46741	0.0027	3L_514084_SNP	0.1538	8.52804e-06	0.001777	0.00217391	SiteClass[FBgn0001316|klar|INTRON|0],TranscriptAnnot[INTRON(MODIFIER||||2262|klar|protein_coding|CODING|FBtr0072565|2|1);INTRON(MODIFIER||||2045|klar|protein_coding|CODING|FBtr0110818|2|1);INTRON(MODIFIER||||1823|klar|protein_coding|CODING|FBtr0112808|2|1);INTRON(MODIFIER||||2272|klar|protein_coding|CODING|FBtr0333850|1|1)]	Free Glucose	-0.1998	0.2227	0.693283
Free Glucose	flavin mononucleotide (FMN)	15797	0.40375	0.0098	FBgn0085413	3R:3640083-3681114	-0.46113	0.0031	3L_514084_SNP	0.1538	8.52804e-06	2.178e-05	0.00217391	SiteClass[FBgn0001316|klar|INTRON|0],TranscriptAnnot[INTRON(MODIFIER||||2262|klar|protein_coding|CODING|FBtr0072565|2|1);INTRON(MODIFIER||||2045|klar|protein_coding|CODING|FBtr0110818|2|1);INTRON(MODIFIER||||1823|klar|protein_coding|CODING|FBtr0112808|2|1);INTRON(MODIFIER||||2272|klar|protein_coding|CODING|FBtr0333850|1|1)]	Free Glucose	-0.10243	0.5349	0.693283
Free Glucose	flavin mononucleotide (FMN)	15797	0.40375	0.0098	FBgn0261285	3R:14964776-14973632	-0.48077	0.0019	3L_5397553_SNP	0.359	2.54949e-06	0.0009115	0.00217391	SiteClass[|||],TranscriptAnnot[INTERGENIC(MODIFIER||||||||||1)]	Free Glucose	-0.0917	0.5788	0.0433359
Free Glucose	3-hydroxypropanoate	1556	-0.34071	0.0314	FBgn0033913	2R:10107403-10118125	-0.4915	0.0015	3L_5403227_SNP	0.1538	6.74633e-06	0.0003491	0.000431034	SiteClass[|||],TranscriptAnnot[INTERGENIC(MODIFIER||||||||||1)]	Free Glucose	-0.04332	0.7934	0.370504
Free Glucose	3-hydroxypropanoate	1556	-0.34071	0.0314	FBgn0028952	2L:2045494-2048054	0.50304	0.0011	3L_5403227_SNP	0.1538	6.74633e-06	0.0002057	0.000431034	SiteClass[|||],TranscriptAnnot[INTERGENIC(MODIFIER||||||||||1)]	Free Glucose	-0.01215	0.9415	0.370504
Free Glucose	3-hydroxypropanoate	1556	-0.34071	0.0314	FBgn0038330	3R:11193538-11195667	0.6002	<.0001	3L_6243836_SNP	0.2	6.68253e-08	0.0003452	0.000431034	SiteClass[FBgn0035696|Best2|INTRON|0],TranscriptAnnot[INTRON(MODIFIER||||809|Best2|protein_coding|CODING|FBtr0077010|6|1)]	Free Glucose	-0.36822	0.0211	0.316935
Free Glucose	3-hydroxypropanoate	1556	-0.34071	0.0314	FBgn0051272	3R:6582018-6585120	-0.51599	0.0008	3L_6243836_SNP	0.2	6.68253e-08	0.0002008	0.000431034	SiteClass[FBgn0035696|Best2|INTRON|0],TranscriptAnnot[INTRON(MODIFIER||||809|Best2|protein_coding|CODING|FBtr0077010|6|1)]	Free Glucose	0.23016	0.1587	0.316935
Free Glucose	3-hydroxypropanoate	1556	-0.34071	0.0314	FBgn0028519	2L:14027001-14029368	-0.52773	0.0006	3L_6243836_SNP	0.2	6.68253e-08	4.315e-05	0.000431034	SiteClass[FBgn0035696|Best2|INTRON|0],TranscriptAnnot[INTRON(MODIFIER||||809|Best2|protein_coding|CODING|FBtr0077010|6|1)]	Free Glucose	0.31073	0.0542	0.316935
Free Glucose	1-palmitoleoyl-2-oleoyl-glycerol (16:1/18:1)*	52632	0.32645	0.0398	FBgn0045038	2L:7864642-7871432	-0.55587	0.0002	3L_6249486_SNP	0.125	6.81503e-06	4.085e-05	0.00121951	SiteClass[FBgn0035696|Best2|INTRON|0],TranscriptAnnot[INTRON(MODIFIER||||809|Best2|protein_coding|CODING|FBtr0077010|1|1)]	Free Glucose	-0.07409	0.654	0.960713
Free Glucose	1-palmitoleoyl-2-oleoyl-glycerol (16:1/18:1)*	52632	0.32645	0.0398	FBgn0045038	2L:7864642-7871432	-0.55587	0.0002	3L_6257524_SNP	0.1026	3.09129e-06	2.683e-06	0.00121951	SiteClass[|||],TranscriptAnnot[INTERGENIC(MODIFIER||||||||||1)]	Free Glucose	-0.07409	0.654	0.740863
Free Glucose	1-palmitoleoyl-2-oleoyl-glycerol (16:1/18:1)*	52632	0.32645	0.0398	FBgn0035608	3L:5490623-5492058	-0.52895	0.0005	3L_6257633_SNP	0.125	8.11361e-07	0.000431	0.00121951	SiteClass[|||],TranscriptAnnot[INTERGENIC(MODIFIER||||||||||1)]	Free Glucose	-0.24899	0.1264	0.909005
Free Glucose	1-palmitoleoyl-2-oleoyl-glycerol (16:1/18:1)*	52632	0.32645	0.0398	FBgn0010470	2R:17374672-17385434	-0.49555	0.0013	3L_6257633_SNP	0.125	8.11361e-07	0.0003247	0.00121951	SiteClass[|||],TranscriptAnnot[INTERGENIC(MODIFIER||||||||||1)]	Free Glucose	-0.13866	0.3999	0.909005
Free Glucose	1-palmitoleoyl-2-oleoyl-glycerol (16:1/18:1)*	52632	0.32645	0.0398	FBgn0045038	2L:7864642-7871432	-0.55587	0.0002	3L_6257633_SNP	0.125	8.11361e-07	4.287e-06	0.00121951	SiteClass[|||],TranscriptAnnot[INTERGENIC(MODIFIER||||||||||1)]	Free Glucose	-0.07409	0.654	0.909005
Free Glucose	1-palmitoleoyl-2-oleoyl-glycerol (16:1/18:1)*	52632	0.32645	0.0398	FBgn0014469	2R:4332065-4334669	-0.45263	0.0038	3L_6257633_SNP	0.125	8.11361e-07	0.0005752	0.00121951	SiteClass[|||],TranscriptAnnot[INTERGENIC(MODIFIER||||||||||1)]	Free Glucose	0.07996	0.6285	0.909005
Free Glucose	1-palmitoleoyl-2-oleoyl-glycerol (16:1/18:1)*	52632	0.32645	0.0398	FBgn0014469	2R:4332065-4334669	-0.45263	0.0038	3L_6257951_SNP	0.1316	2.05315e-06	0.000761	0.00121951	SiteClass[|||],TranscriptAnnot[INTERGENIC(MODIFIER||||||||||1)]	Free Glucose	0.07996	0.6285	0.975587
Free Glucose	1-palmitoleoyl-2-oleoyl-glycerol (16:1/18:1)*	52632	0.32645	0.0398	FBgn0045038	2L:7864642-7871432	-0.55587	0.0002	3L_6257951_SNP	0.1316	2.05315e-06	7.804e-06	0.00121951	SiteClass[|||],TranscriptAnnot[INTERGENIC(MODIFIER||||||||||1)]	Free Glucose	-0.07409	0.654	0.975587
Free Glucose	1-palmitoleoyl-2-oleoyl-glycerol (16:1/18:1)*	52632	0.32645	0.0398	FBgn0010470	2R:17374672-17385434	-0.49555	0.0013	3L_6257951_SNP	0.1316	2.05315e-06	0.0003062	0.00121951	SiteClass[|||],TranscriptAnnot[INTERGENIC(MODIFIER||||||||||1)]	Free Glucose	-0.13866	0.3999	0.975587
Free Glucose	1-palmitoleoyl-2-oleoyl-glycerol (16:1/18:1)*	52632	0.32645	0.0398	FBgn0035608	3L:5490623-5492058	-0.52895	0.0005	3L_6257951_SNP	0.1316	2.05315e-06	0.0006228	0.00121951	SiteClass[|||],TranscriptAnnot[INTERGENIC(MODIFIER||||||||||1)]	Free Glucose	-0.24899	0.1264	0.975587
Free Glucose	1-palmitoleoyl-2-oleoyl-glycerol (16:1/18:1)*	52632	0.32645	0.0398	FBgn0045038	2L:7864642-7871432	-0.55587	0.0002	3L_6259697_SNP	0.1026	4.86148e-06	3.183e-06	0.00121951	SiteClass[|||],TranscriptAnnot[INTERGENIC(MODIFIER||||||||||1)]	Free Glucose	-0.07409	0.654	0.736703
Free Glucose	1-palmitoleoyl-2-oleoyl-glycerol (16:1/18:1)*	52632	0.32645	0.0398	FBgn0003249	3R:15906782-15908172	-0.55142	0.0003	3L_6261065_SNP	0.1111	1.97354e-06	0.0003589	0.00121951	SiteClass[|||],TranscriptAnnot[INTERGENIC(MODIFIER||||||||||1)]	Free Glucose	-0.36174	0.0236	0.75346
Free Glucose	1-palmitoleoyl-2-oleoyl-glycerol (16:1/18:1)*	52632	0.32645	0.0398	FBgn0045038	2L:7864642-7871432	-0.55587	0.0002	3L_6261065_SNP	0.1111	1.97354e-06	2.307e-06	0.00121951	SiteClass[|||],TranscriptAnnot[INTERGENIC(MODIFIER||||||||||1)]	Free Glucose	-0.07409	0.654	0.75346
Free Glucose	propionylcarnitine	32452	-0.34747	0.028	FBgn0037090	3L:21494521-21497059	-0.46579	0.0028	3L_7163818_INS	0.1053	2.20218e-07	0.0003774	0.0015625	SiteClass[FBgn0265296|Dscam2|DOWNSTREAM|52],TranscriptAnnot[DOWNSTREAM(MODIFIER||52||752|Dscam2|protein_coding|CODING|FBtr0299547||1);INTRON(MODIFIER||||1808|Dscam2|protein_coding|CODING|FBtr0299548|10|1);INTRON(MODIFIER||||2040|Dscam2|protein_coding|CODING|FBtr0299549|10|1);INTRON(MODIFIER||||2074|Dscam2|protein_coding|CODING|FBtr0299551|10|1);INTRON(MODIFIER||||1833|Dscam2|protein_coding|CODING…	Free Glucose	0.06619	0.6889	0.143461
Free Glucose	propionylcarnitine	32452	-0.34747	0.028	XLOC_016571	3L:7252064-7253515	0.49231	0.0015	3L_7163818_INS	0.1053	2.20218e-07	5.233e-05	0.0015625	SiteClass[FBgn0265296|Dscam2|DOWNSTREAM|52],TranscriptAnnot[DOWNSTREAM(MODIFIER||52||752|Dscam2|protein_coding|CODING|FBtr0299547||1);INTRON(MODIFIER||||1808|Dscam2|protein_coding|CODING|FBtr0299548|10|1);INTRON(MODIFIER||||2040|Dscam2|protein_coding|CODING|FBtr0299549|10|1);INTRON(MODIFIER||||2074|Dscam2|protein_coding|CODING|FBtr0299551|10|1);INTRON(MODIFIER||||1833|Dscam2|protein_coding|CODING…	Free Glucose	-0.06579	0.6907	0.143461
Free Glucose	propionylcarnitine	32452	-0.34747	0.028	FBgn0035906	3L:8514529-8516601	-0.47206	0.0024	3L_7163818_INS	0.1053	2.20218e-07	0.001523	0.0015625	SiteClass[FBgn0265296|Dscam2|DOWNSTREAM|52],TranscriptAnnot[DOWNSTREAM(MODIFIER||52||752|Dscam2|protein_coding|CODING|FBtr0299547||1);INTRON(MODIFIER||||1808|Dscam2|protein_coding|CODING|FBtr0299548|10|1);INTRON(MODIFIER||||2040|Dscam2|protein_coding|CODING|FBtr0299549|10|1);INTRON(MODIFIER||||2074|Dscam2|protein_coding|CODING|FBtr0299551|10|1);INTRON(MODIFIER||||1833|Dscam2|protein_coding|CODING…	Free Glucose	0.09514	0.5645	0.143461
Free Glucose	propionylcarnitine	32452	-0.34747	0.028	FBgn0040732	2R:15387800-15388923	-0.4749	0.0023	3L_7163818_INS	0.1053	2.20218e-07	0.001429	0.0015625	SiteClass[FBgn0265296|Dscam2|DOWNSTREAM|52],TranscriptAnnot[DOWNSTREAM(MODIFIER||52||752|Dscam2|protein_coding|CODING|FBtr0299547||1);INTRON(MODIFIER||||1808|Dscam2|protein_coding|CODING|FBtr0299548|10|1);INTRON(MODIFIER||||2040|Dscam2|protein_coding|CODING|FBtr0299549|10|1);INTRON(MODIFIER||||2074|Dscam2|protein_coding|CODING|FBtr0299551|10|1);INTRON(MODIFIER||||1833|Dscam2|protein_coding|CODING…	Free Glucose	0.32834	0.0413	0.143461
Free Glucose	propionylcarnitine	32452	-0.34747	0.028	FBgn0037481	3R:2979960-2980902	-0.48603	0.0017	3L_7163818_INS	0.1053	2.20218e-07	0.001423	0.0015625	SiteClass[FBgn0265296|Dscam2|DOWNSTREAM|52],TranscriptAnnot[DOWNSTREAM(MODIFIER||52||752|Dscam2|protein_coding|CODING|FBtr0299547||1);INTRON(MODIFIER||||1808|Dscam2|protein_coding|CODING|FBtr0299548|10|1);INTRON(MODIFIER||||2040|Dscam2|protein_coding|CODING|FBtr0299549|10|1);INTRON(MODIFIER||||2074|Dscam2|protein_coding|CODING|FBtr0299551|10|1);INTRON(MODIFIER||||1833|Dscam2|protein_coding|CODING…	Free Glucose	-0.01154	0.9444	0.143461
Free Glucose	3-hydroxypropanoate	1556	-0.34071	0.0314	FBgn0033913	2R:10107403-10118125	-0.4915	0.0015	3L_719640_SNP	0.1538	5.94425e-06	0.0001478	0.000431034	SiteClass[|||],TranscriptAnnot[INTERGENIC(MODIFIER||||||||||1)]	Free Glucose	-0.04332	0.7934	0.405805
Free Glucose	propionylcarnitine	32452	-0.34747	0.028	FBgn0040732	2R:15387800-15388923	-0.4749	0.0023	3L_7968133_SNP	0.1579	8.63772e-07	0.001154	0.0015625	SiteClass[FBgn0027554|CG8042|UPSTREAM|42;FBgn0035829|HP4|DOWNSTREAM|405],TranscriptAnnot[UPSTREAM(MODIFIER||42||656|CG8042|protein_coding|CODING|FBtr0076766||1);DOWNSTREAM(MODIFIER||405||106|HP4|protein_coding|CODING|FBtr0076764||1);DOWNSTREAM(MODIFIER||405||100|HP4|protein_coding|CODING|FBtr0076765||1);INTERGENIC(MODIFIER||||||||||1)]	Free Glucose	0.32834	0.0413	0.146746
Free Glucose	propionylcarnitine	32452	-0.34747	0.028	FBgn0017448	3R:27581078-27584359	0.45486	0.0036	3L_7968133_SNP	0.1579	8.63772e-07	0.0004011	0.0015625	SiteClass[FBgn0027554|CG8042|UPSTREAM|42;FBgn0035829|HP4|DOWNSTREAM|405],TranscriptAnnot[UPSTREAM(MODIFIER||42||656|CG8042|protein_coding|CODING|FBtr0076766||1);DOWNSTREAM(MODIFIER||405||106|HP4|protein_coding|CODING|FBtr0076764||1);DOWNSTREAM(MODIFIER||405||100|HP4|protein_coding|CODING|FBtr0076765||1);INTERGENIC(MODIFIER||||||||||1)]	Free Glucose	-0.27551	0.0896	0.146746
Free Glucose	propionylcarnitine	32452	-0.34747	0.028	XLOC_016571	3L:7252064-7253515	0.49231	0.0015	3L_7968133_SNP	0.1579	8.63772e-07	2.469e-07	0.0015625	SiteClass[FBgn0027554|CG8042|UPSTREAM|42;FBgn0035829|HP4|DOWNSTREAM|405],TranscriptAnnot[UPSTREAM(MODIFIER||42||656|CG8042|protein_coding|CODING|FBtr0076766||1);DOWNSTREAM(MODIFIER||405||106|HP4|protein_coding|CODING|FBtr0076764||1);DOWNSTREAM(MODIFIER||405||100|HP4|protein_coding|CODING|FBtr0076765||1);INTERGENIC(MODIFIER||||||||||1)]	Free Glucose	-0.06579	0.6907	0.146746
Free Glucose	propionylcarnitine	32452	-0.34747	0.028	FBgn0040732	2R:15387800-15388923	-0.4749	0.0023	3L_7968476_SNP	0.1081	8.92239e-07	0.0007012	0.0015625	SiteClass[FBgn0035829|HP4|DOWNSTREAM|62;FBgn0027554|CG8042|UPSTREAM|385],TranscriptAnnot[UPSTREAM(MODIFIER||385||656|CG8042|protein_coding|CODING|FBtr0076766||1);DOWNSTREAM(MODIFIER||62||106|HP4|protein_coding|CODING|FBtr0076764||1);DOWNSTREAM(MODIFIER||62||100|HP4|protein_coding|CODING|FBtr0076765||1);INTERGENIC(MODIFIER||||||||||1)]	Free Glucose	0.32834	0.0413	0.277751
Free Glucose	propionylcarnitine	32452	-0.34747	0.028	XLOC_016571	3L:7252064-7253515	0.49231	0.0015	3L_7968476_SNP	0.1081	8.92239e-07	2.68e-05	0.0015625	SiteClass[FBgn0035829|HP4|DOWNSTREAM|62;FBgn0027554|CG8042|UPSTREAM|385],TranscriptAnnot[UPSTREAM(MODIFIER||385||656|CG8042|protein_coding|CODING|FBtr0076766||1);DOWNSTREAM(MODIFIER||62||106|HP4|protein_coding|CODING|FBtr0076764||1);DOWNSTREAM(MODIFIER||62||100|HP4|protein_coding|CODING|FBtr0076765||1);INTERGENIC(MODIFIER||||||||||1)]	Free Glucose	-0.06579	0.6907	0.277751
Free Glucose	propionylcarnitine	32452	-0.34747	0.028	FBgn0037090	3L:21494521-21497059	-0.46579	0.0028	3L_7968476_SNP	0.1081	8.92239e-07	0.0009299	0.0015625	SiteClass[FBgn0035829|HP4|DOWNSTREAM|62;FBgn0027554|CG8042|UPSTREAM|385],TranscriptAnnot[UPSTREAM(MODIFIER||385||656|CG8042|protein_coding|CODING|FBtr0076766||1);DOWNSTREAM(MODIFIER||62||106|HP4|protein_coding|CODING|FBtr0076764||1);DOWNSTREAM(MODIFIER||62||100|HP4|protein_coding|CODING|FBtr0076765||1);INTERGENIC(MODIFIER||||||||||1)]	Free Glucose	0.06619	0.6889	0.277751
Free Glucose	choline phosphate	34396	0.3955	0.0115	FBgn0035206	3L:1311719-1313377	-0.45243	0.0038	3L_8969812_SNP	0.225	9.34784e-06	0.00408	0.005	SiteClass[FBgn0035947|Srp68|SYNONYMOUS_CODING|0;FBgn0035948|CG5644|DOWNSTREAM|683],TranscriptAnnot[SYNONYMOUS_CODING(LOW|SILENT|gcC/gcG|A455|604|Srp68|protein_coding|CODING|FBtr0076517|4|1);DOWNSTREAM(MODIFIER||683||459|CG5644|protein_coding|CODING|FBtr0076556||1)]	Free Glucose	-0.18684	0.2547	0.131453
Free Glucose	choline phosphate	34396	0.3955	0.0115	FBgn0050438	2R:1384179-1437048	0.4753	0.0022	3L_8969812_SNP	0.225	9.34784e-06	0.0001635	0.005	SiteClass[FBgn0035947|Srp68|SYNONYMOUS_CODING|0;FBgn0035948|CG5644|DOWNSTREAM|683],TranscriptAnnot[SYNONYMOUS_CODING(LOW|SILENT|gcC/gcG|A455|604|Srp68|protein_coding|CODING|FBtr0076517|4|1);DOWNSTREAM(MODIFIER||683||459|CG5644|protein_coding|CODING|FBtr0076556||1)]	Free Glucose	-0.28684	0.0767	0.131453
Free Glucose	choline phosphate	34396	0.3955	0.0115	FBgn0050033	2R:7180036-7181096	-0.46437	0.0029	3L_8969812_SNP	0.225	9.34784e-06	0.004985	0.005	SiteClass[FBgn0035947|Srp68|SYNONYMOUS_CODING|0;FBgn0035948|CG5644|DOWNSTREAM|683],TranscriptAnnot[SYNONYMOUS_CODING(LOW|SILENT|gcC/gcG|A455|604|Srp68|protein_coding|CODING|FBtr0076517|4|1);DOWNSTREAM(MODIFIER||683||459|CG5644|protein_coding|CODING|FBtr0076556||1)]	Free Glucose	-0.06275	0.7043	0.131453
Free Glucose	choline phosphate	34396	0.3955	0.0115	FBgn0261859	3R:10921679-10957648	0.5587	0.0002	3L_8969812_SNP	0.225	9.34784e-06	0.002159	0.005	SiteClass[FBgn0035947|Srp68|SYNONYMOUS_CODING|0;FBgn0035948|CG5644|DOWNSTREAM|683],TranscriptAnnot[SYNONYMOUS_CODING(LOW|SILENT|gcC/gcG|A455|604|Srp68|protein_coding|CODING|FBtr0076517|4|1);DOWNSTREAM(MODIFIER||683||459|CG5644|protein_coding|CODING|FBtr0076556||1)]	Free Glucose	0.14939	0.364	0.131453
Free Glucose	choline phosphate	34396	0.3955	0.0115	FBgn0036428	3L:14534037-14544075	0.4587	0.0033	3L_8969812_SNP	0.225	9.34784e-06	0.003893	0.005	SiteClass[FBgn0035947|Srp68|SYNONYMOUS_CODING|0;FBgn0035948|CG5644|DOWNSTREAM|683],TranscriptAnnot[SYNONYMOUS_CODING(LOW|SILENT|gcC/gcG|A455|604|Srp68|protein_coding|CODING|FBtr0076517|4|1);DOWNSTREAM(MODIFIER||683||459|CG5644|protein_coding|CODING|FBtr0076556||1)]	Free Glucose	0.3917	0.0137	0.131453
Free Glucose	choline phosphate	34396	0.3955	0.0115	FBgn0263336	2R:12705024-12706745	0.48664	0.0017	3L_8969812_SNP	0.225	9.34784e-06	0.001443	0.005	SiteClass[FBgn0035947|Srp68|SYNONYMOUS_CODING|0;FBgn0035948|CG5644|DOWNSTREAM|683],TranscriptAnnot[SYNONYMOUS_CODING(LOW|SILENT|gcC/gcG|A455|604|Srp68|protein_coding|CODING|FBtr0076517|4|1);DOWNSTREAM(MODIFIER||683||459|CG5644|protein_coding|CODING|FBtr0076556||1)]	Free Glucose	-0.05931	0.7198	0.131453
Free Glucose	choline phosphate	34396	0.3955	0.0115	FBgn0062961	2R:14598896-14599456	-0.48866	0.0016	3L_8969812_SNP	0.225	9.34784e-06	0.001564	0.005	SiteClass[FBgn0035947|Srp68|SYNONYMOUS_CODING|0;FBgn0035948|CG5644|DOWNSTREAM|683],TranscriptAnnot[SYNONYMOUS_CODING(LOW|SILENT|gcC/gcG|A455|604|Srp68|protein_coding|CODING|FBtr0076517|4|1);DOWNSTREAM(MODIFIER||683||459|CG5644|protein_coding|CODING|FBtr0076556||1)]	Free Glucose	0.04089	0.8048	0.131453
Free Glucose	choline phosphate	34396	0.3955	0.0115	FBgn0031227	2L:153539-155305	-0.48563	0.0017	3L_8969812_SNP	0.225	9.34784e-06	6.92e-05	0.005	SiteClass[FBgn0035947|Srp68|SYNONYMOUS_CODING|0;FBgn0035948|CG5644|DOWNSTREAM|683],TranscriptAnnot[SYNONYMOUS_CODING(LOW|SILENT|gcC/gcG|A455|604|Srp68|protein_coding|CODING|FBtr0076517|4|1);DOWNSTREAM(MODIFIER||683||459|CG5644|protein_coding|CODING|FBtr0076556||1)]	Free Glucose	-0.23745	0.1455	0.131453
Free Glucose	1-methylurate	34395	-0.39231	0.0123	XLOC_026860	4:942987-950743	-0.45547	0.0036	3L_9582341_INS	0.1026	7.01065e-07	0.000373	0.000420168	SiteClass[FBgn0261555|CG42673|INTRON|0],TranscriptAnnot[INTRON(MODIFIER||||698|CG42673|protein_coding|CODING|FBtr0302709|6|1);INTRON(MODIFIER||||904|CG42673|protein_coding|CODING|FBtr0302710|3|1);INTRON(MODIFIER||||438|CG42673|protein_coding|CODING|FBtr0302711|6|1)]	Free Glucose	0.15101	0.3588	0.391303
Free Glucose	1-palmitoleoyl-2-oleoyl-glycerol (16:1/18:1)*	52632	0.32645	0.0398	FBgn0045038	2L:7864642-7871432	-0.55587	0.0002	3L_9945615_SNP	0.2564	9.45076e-06	9.006e-06	0.00121951	SiteClass[FBgn0085385|CG34356|INTRON|0],TranscriptAnnot[INTRON(MODIFIER||||834|CG34356|protein_coding|CODING|FBtr0331577|11|1);INTRON(MODIFIER||||834|CG34356|protein_coding|CODING|FBtr0331578|11|1);INTRON(MODIFIER||||854|CG34356|protein_coding|CODING|FBtr0331579|10|1)]	Free Glucose	-0.07409	0.654	0.581234
Free Glucose	1-palmitoleoyl-2-oleoyl-glycerol (16:1/18:1)*	52632	0.32645	0.0398	FBgn0031936	2L:7719847-7722823	-0.56721	0.0002	3L_9945615_SNP	0.2564	9.45076e-06	0.0007632	0.00121951	SiteClass[FBgn0085385|CG34356|INTRON|0],TranscriptAnnot[INTRON(MODIFIER||||834|CG34356|protein_coding|CODING|FBtr0331577|11|1);INTRON(MODIFIER||||834|CG34356|protein_coding|CODING|FBtr0331578|11|1);INTRON(MODIFIER||||854|CG34356|protein_coding|CODING|FBtr0331579|10|1)]	Free Glucose	-0.23664	0.1469	0.581234
Free Glucose	panose	37284	0.39606	0.0114	FBgn0044047	X:2225526-2228691	0.54555	0.0003	3R_10496188_SNP	0.125	8.1828e-06	1.799e-05	0.00138889	SiteClass[FBgn0265140|Meltrin|INTRON|0],TranscriptAnnot[INTRON(MODIFIER||||1407|Meltrin|protein_coding|CODING|FBtr0301498|5|1);INTRON(MODIFIER||||975|Meltrin|protein_coding|CODING|FBtr0301499|5|1)]	Free Glucose	0.36417	0.0227	0.207648
Free Glucose	panose	37284	0.39606	0.0114	FBgn0031888	2L:7069536-7084635	-0.52692	0.0006	3R_10496188_SNP	0.125	8.1828e-06	8.901e-05	0.00138889	SiteClass[FBgn0265140|Meltrin|INTRON|0],TranscriptAnnot[INTRON(MODIFIER||||1407|Meltrin|protein_coding|CODING|FBtr0301498|5|1);INTRON(MODIFIER||||975|Meltrin|protein_coding|CODING|FBtr0301499|5|1)]	Free Glucose	-0.01822	0.9123	0.207648
Free Glucose	panose	37284	0.39606	0.0114	FBgn0031888	2L:7069536-7084635	-0.52692	0.0006	3R_10498420_SNP	0.1538	5.06461e-07	0.0002766	0.00138889	SiteClass[FBgn0265140|Meltrin|INTRON|0],TranscriptAnnot[INTRON(MODIFIER||||1407|Meltrin|protein_coding|CODING|FBtr0301498|1|1);INTRON(MODIFIER||||975|Meltrin|protein_coding|CODING|FBtr0301499|1|1)]	Free Glucose	-0.01822	0.9123	0.110324
Free Glucose	panose	37284	0.39606	0.0114	FBgn0044047	X:2225526-2228691	0.54555	0.0003	3R_10498420_SNP	0.1538	5.06461e-07	0.0004882	0.00138889	SiteClass[FBgn0265140|Meltrin|INTRON|0],TranscriptAnnot[INTRON(MODIFIER||||1407|Meltrin|protein_coding|CODING|FBtr0301498|1|1);INTRON(MODIFIER||||975|Meltrin|protein_coding|CODING|FBtr0301499|1|1)]	Free Glucose	0.36417	0.0227	0.110324
Free Glucose	panose	37284	0.39606	0.0114	FBgn0044047	X:2225526-2228691	0.54555	0.0003	3R_10498743_DEL	0.1282	8.11114e-06	1.816e-05	0.00138889	SiteClass[FBgn0265140|Meltrin|INTRON|0],TranscriptAnnot[INTRON(MODIFIER||||1407|Meltrin|protein_coding|CODING|FBtr0301498|1|1);INTRON(MODIFIER||||975|Meltrin|protein_coding|CODING|FBtr0301499|1|1)]	Free Glucose	0.36417	0.0227	0.209599
Free Glucose	panose	37284	0.39606	0.0114	FBgn0031888	2L:7069536-7084635	-0.52692	0.0006	3R_10498743_DEL	0.1282	8.11114e-06	0.0001044	0.00138889	SiteClass[FBgn0265140|Meltrin|INTRON|0],TranscriptAnnot[INTRON(MODIFIER||||1407|Meltrin|protein_coding|CODING|FBtr0301498|1|1);INTRON(MODIFIER||||975|Meltrin|protein_coding|CODING|FBtr0301499|1|1)]	Free Glucose	-0.01822	0.9123	0.209599
Free Glucose	panose	37284	0.39606	0.0114	FBgn0044047	X:2225526-2228691	0.54555	0.0003	3R_10501752_SNP	0.1316	6.23721e-06	1.538e-05	0.00138889	SiteClass[FBgn0265140|Meltrin|INTRON|0],TranscriptAnnot[INTRON(MODIFIER||||1407|Meltrin|protein_coding|CODING|FBtr0301498|1|1);INTRON(MODIFIER||||975|Meltrin|protein_coding|CODING|FBtr0301499|1|1)]	Free Glucose	0.36417	0.0227	0.186817
Free Glucose	panose	37284	0.39606	0.0114	FBgn0031888	2L:7069536-7084635	-0.52692	0.0006	3R_10501752_SNP	0.1316	6.23721e-06	0.0001378	0.00138889	SiteClass[FBgn0265140|Meltrin|INTRON|0],TranscriptAnnot[INTRON(MODIFIER||||1407|Meltrin|protein_coding|CODING|FBtr0301498|1|1);INTRON(MODIFIER||||975|Meltrin|protein_coding|CODING|FBtr0301499|1|1)]	Free Glucose	-0.01822	0.9123	0.186817
Free Glucose	histamine	1574	-0.36831	0.0194	FBgn0267073	X:5322516-5323289	-0.45286	0.0038	3R_11287362_SNP	0.1081	4.86079e-06	0.001538	0.00172414	SiteClass[FBgn0038341|AdamTS-A|INTRON|0],TranscriptAnnot[UPSTREAM(MODIFIER||559||1537|AdamTS-A|protein_coding|CODING|FBtr0339398||1);INTRON(MODIFIER||||1585|AdamTS-A|protein_coding|CODING|FBtr0334629|1|1);INTRON(MODIFIER||||1688|AdamTS-A|protein_coding|CODING|FBtr0083160|1|1)]	Free Glucose	-0.02773	0.8669	0.883599
Free Glucose	histamine	1574	-0.36831	0.0194	FBgn0039326	3R:21146775-21148479	-0.47634	0.0022	3R_11287362_SNP	0.1081	4.86079e-06	0.001398	0.00172414	SiteClass[FBgn0038341|AdamTS-A|INTRON|0],TranscriptAnnot[UPSTREAM(MODIFIER||559||1537|AdamTS-A|protein_coding|CODING|FBtr0339398||1);INTRON(MODIFIER||||1585|AdamTS-A|protein_coding|CODING|FBtr0334629|1|1);INTRON(MODIFIER||||1688|AdamTS-A|protein_coding|CODING|FBtr0083160|1|1)]	Free Glucose	0.42814	0.0065	0.883599
Free Glucose	1-methylurate	34395	-0.39231	0.0123	FBgn0002563	2L:898500-901316	-0.46559	0.0028	3R_1193295_SNP	0.2632	1.23866e-06	0.0004063	0.000420168	SiteClass[FBgn0037315|Cerk|INTRON|0;FBgn0264912|CR44103|UPSTREAM|908],TranscriptAnnot[UPSTREAM(MODIFIER||908|||CR44103|ncRNA|NON_CODING|FBtr0335001||1);INTRON(MODIFIER||||687|Cerk|protein_coding|CODING|FBtr0078803|1|1)]	Free Glucose	0.00911	0.9561	0.139767
Free Glucose	1-methylurate	34395	-0.39231	0.0123	FBgn0039154	3R:19963617-19966658	-0.49818	0.0012	3R_1193295_SNP	0.2632	1.23866e-06	0.0002051	0.000420168	SiteClass[FBgn0037315|Cerk|INTRON|0;FBgn0264912|CR44103|UPSTREAM|908],TranscriptAnnot[UPSTREAM(MODIFIER||908|||CR44103|ncRNA|NON_CODING|FBtr0335001||1);INTRON(MODIFIER||||687|Cerk|protein_coding|CODING|FBtr0078803|1|1)]	Free Glucose	-0.08057	0.6259	0.139767
Free Glucose	1-methylurate	34395	-0.39231	0.0123	FBgn0265419	3R:3938421-3939725	0.46943	0.0026	3R_1193295_SNP	0.2632	1.23866e-06	0.0001399	0.000420168	SiteClass[FBgn0037315|Cerk|INTRON|0;FBgn0264912|CR44103|UPSTREAM|908],TranscriptAnnot[UPSTREAM(MODIFIER||908|||CR44103|ncRNA|NON_CODING|FBtr0335001||1);INTRON(MODIFIER||||687|Cerk|protein_coding|CODING|FBtr0078803|1|1)]	Free Glucose	0.17227	0.2943	0.139767
Free Glucose	3-hydroxypropanoate	1556	-0.34071	0.0314	FBgn0032733	2L:18988268-18990233	-0.5413	0.0004	3R_11947186_SNP	0.2308	7.01661e-06	0.0004097	0.000431034	SiteClass[FBgn0003319|Sb|INTRON|0],TranscriptAnnot[INTRON(MODIFIER||||787|Sb|protein_coding|CODING|FBtr0344008|1|1)]	Free Glucose	0.31538	0.0505	0.178112
Free Glucose	3-hydroxypropanoate	1556	-0.34071	0.0314	FBgn0023129	3L:9416353-9417881	-0.49798	0.0013	3R_12319870_SNP	0.1579	7.82261e-06	7.46e-05	0.000431034	SiteClass[FBgn0038439|Cad89D|INTRON|0],TranscriptAnnot[INTRON(MODIFIER||||2240|Cad89D|protein_coding|CODING|FBtr0301702|1|1)]	Free Glucose	0.19211	0.2414	0.1042
Free Glucose	propionylcarnitine	32452	-0.34747	0.028	FBgn0034262	2R:13577780-13582858	0.49413	0.0014	3R_12745208_SNP	0.1053	2.08332e-06	0.001212	0.0015625	SiteClass[FBgn0264857|iab-8|INTRON|0],TranscriptAnnot[INTRON(MODIFIER|||||iab-8|ncRNA|NON_CODING|FBtr0306340|1|1);INTRON(MODIFIER|||||iab-8|ncRNA|NON_CODING|FBtr0309897|1|1);INTRON(MODIFIER|||||iab-8|ncRNA|NON_CODING|FBtr0336892|1|1);INTRON(MODIFIER|||||iab-8|ncRNA|NON_CODING|FBtr0336893|1|1);INTRON(MODIFIER|||||iab-8|ncRNA|NON_CODING|FBtr0336894|1|1)]	Free Glucose	0.17166	0.2961	0.0301412
Free Glucose	propionylcarnitine	32452	-0.34747	0.028	XLOC_016571	3L:7252064-7253515	0.49231	0.0015	3R_12745208_SNP	0.1053	2.08332e-06	0.00116	0.0015625	SiteClass[FBgn0264857|iab-8|INTRON|0],TranscriptAnnot[INTRON(MODIFIER|||||iab-8|ncRNA|NON_CODING|FBtr0306340|1|1);INTRON(MODIFIER|||||iab-8|ncRNA|NON_CODING|FBtr0309897|1|1);INTRON(MODIFIER|||||iab-8|ncRNA|NON_CODING|FBtr0336892|1|1);INTRON(MODIFIER|||||iab-8|ncRNA|NON_CODING|FBtr0336893|1|1);INTRON(MODIFIER|||||iab-8|ncRNA|NON_CODING|FBtr0336894|1|1)]	Free Glucose	-0.06579	0.6907	0.0301412
Free Glucose	propionylcarnitine	32452	-0.34747	0.028	FBgn0034644	2R:17533682-17545440	-0.49939	0.0012	3R_12745208_SNP	0.1053	2.08332e-06	0.0008828	0.0015625	SiteClass[FBgn0264857|iab-8|INTRON|0],TranscriptAnnot[INTRON(MODIFIER|||||iab-8|ncRNA|NON_CODING|FBtr0306340|1|1);INTRON(MODIFIER|||||iab-8|ncRNA|NON_CODING|FBtr0309897|1|1);INTRON(MODIFIER|||||iab-8|ncRNA|NON_CODING|FBtr0336892|1|1);INTRON(MODIFIER|||||iab-8|ncRNA|NON_CODING|FBtr0336893|1|1);INTRON(MODIFIER|||||iab-8|ncRNA|NON_CODING|FBtr0336894|1|1)]	Free Glucose	-0.27368	0.0918	0.0301412
Free Glucose	propionylcarnitine	32452	-0.34747	0.028	FBgn0037481	3R:2979960-2980902	-0.48603	0.0017	3R_12745208_SNP	0.1053	2.08332e-06	1.545e-05	0.0015625	SiteClass[FBgn0264857|iab-8|INTRON|0],TranscriptAnnot[INTRON(MODIFIER|||||iab-8|ncRNA|NON_CODING|FBtr0306340|1|1);INTRON(MODIFIER|||||iab-8|ncRNA|NON_CODING|FBtr0309897|1|1);INTRON(MODIFIER|||||iab-8|ncRNA|NON_CODING|FBtr0336892|1|1);INTRON(MODIFIER|||||iab-8|ncRNA|NON_CODING|FBtr0336893|1|1);INTRON(MODIFIER|||||iab-8|ncRNA|NON_CODING|FBtr0336894|1|1)]	Free Glucose	-0.01154	0.9444	0.0301412
Free Glucose	propionylcarnitine	32452	-0.34747	0.028	FBgn0030991	X:19074206-19076057	-0.46862	0.0026	3R_12745208_SNP	0.1053	2.08332e-06	0.0005091	0.0015625	SiteClass[FBgn0264857|iab-8|INTRON|0],TranscriptAnnot[INTRON(MODIFIER|||||iab-8|ncRNA|NON_CODING|FBtr0306340|1|1);INTRON(MODIFIER|||||iab-8|ncRNA|NON_CODING|FBtr0309897|1|1);INTRON(MODIFIER|||||iab-8|ncRNA|NON_CODING|FBtr0336892|1|1);INTRON(MODIFIER|||||iab-8|ncRNA|NON_CODING|FBtr0336893|1|1);INTRON(MODIFIER|||||iab-8|ncRNA|NON_CODING|FBtr0336894|1|1)]	Free Glucose	-0.21275	0.1935	0.0301412
Free Glucose	propionylcarnitine	32452	-0.34747	0.028	FBgn0040732	2R:15387800-15388923	-0.4749	0.0023	3R_12745208_SNP	0.1053	2.08332e-06	0.0003465	0.0015625	SiteClass[FBgn0264857|iab-8|INTRON|0],TranscriptAnnot[INTRON(MODIFIER|||||iab-8|ncRNA|NON_CODING|FBtr0306340|1|1);INTRON(MODIFIER|||||iab-8|ncRNA|NON_CODING|FBtr0309897|1|1);INTRON(MODIFIER|||||iab-8|ncRNA|NON_CODING|FBtr0336892|1|1);INTRON(MODIFIER|||||iab-8|ncRNA|NON_CODING|FBtr0336893|1|1);INTRON(MODIFIER|||||iab-8|ncRNA|NON_CODING|FBtr0336894|1|1)]	Free Glucose	0.32834	0.0413	0.0301412
Free Glucose	propionylcarnitine	32452	-0.34747	0.028	FBgn0036428	3L:14534037-14544075	-0.52126	0.0007	3R_12745208_SNP	0.1053	2.08332e-06	0.0002981	0.0015625	SiteClass[FBgn0264857|iab-8|INTRON|0],TranscriptAnnot[INTRON(MODIFIER|||||iab-8|ncRNA|NON_CODING|FBtr0306340|1|1);INTRON(MODIFIER|||||iab-8|ncRNA|NON_CODING|FBtr0309897|1|1);INTRON(MODIFIER|||||iab-8|ncRNA|NON_CODING|FBtr0336892|1|1);INTRON(MODIFIER|||||iab-8|ncRNA|NON_CODING|FBtr0336893|1|1);INTRON(MODIFIER|||||iab-8|ncRNA|NON_CODING|FBtr0336894|1|1)]	Free Glucose	0.3917	0.0137	0.0301412
Free Glucose	propionylcarnitine	32452	-0.34747	0.028	FBgn0002567	2R:5065369-5073847	-0.52389	0.0006	3R_12745208_SNP	0.1053	2.08332e-06	0.0006475	0.0015625	SiteClass[FBgn0264857|iab-8|INTRON|0],TranscriptAnnot[INTRON(MODIFIER|||||iab-8|ncRNA|NON_CODING|FBtr0306340|1|1);INTRON(MODIFIER|||||iab-8|ncRNA|NON_CODING|FBtr0309897|1|1);INTRON(MODIFIER|||||iab-8|ncRNA|NON_CODING|FBtr0336892|1|1);INTRON(MODIFIER|||||iab-8|ncRNA|NON_CODING|FBtr0336893|1|1);INTRON(MODIFIER|||||iab-8|ncRNA|NON_CODING|FBtr0336894|1|1)]	Free Glucose	-0.05607	0.7346	0.0301412
Free Glucose	3-hydroxypropanoate	1556	-0.34071	0.0314	FBgn0050115	2R:14441624-14499282	-0.45263	0.0038	3R_13266257_SNP	0.125	1.61603e-06	0.0001357	0.000431034	SiteClass[FBgn0038511|CG5873|INTRON|0;FBgn0038510|CG14331|NON_SYNONYMOUS_CODING|0],TranscriptAnnot[NON_SYNONYMOUS_CODING(MODERATE|MISSENSE|aCt/aTt|T57I|312|CG14331|protein_coding|CODING|FBtr0113244|1|1);INTRON(MODIFIER||||753|CG5873|protein_coding|CODING|FBtr0083442|2|1)]	Free Glucose	-0.15283	0.353	0.481382
Free Glucose	panose	37284	0.39606	0.0114	FBgn0044047	X:2225526-2228691	0.54555	0.0003	3R_13397812_SNP	0.45	5.78846e-06	3.605e-05	0.00138889	SiteClass[|||],TranscriptAnnot[INTERGENIC(MODIFIER||||||||||1)]	Free Glucose	0.36417	0.0227	0.0651519
Free Glucose	glycerol 3-phosphate	43847	0.38386	0.0145	FBgn0032222	2L:10331471-10333129	0.48745	0.0016	3R_13760716_INS	0.1026	1.60656e-06	0.0001759	0.000235849	SiteClass[FBgn0263995|cpo|INTRON|0],TranscriptAnnot[INTRON(MODIFIER||||749|cpo|protein_coding|CODING|FBtr0330273|1|1);INTRON(MODIFIER||||607|cpo|protein_coding|CODING|FBtr0330275|1|1);INTRON(MODIFIER||||607|cpo|protein_coding|CODING|FBtr0330277|1|1);INTRON(MODIFIER||||762|cpo|protein_coding|CODING|FBtr0330272|1|1);INTRON(MODIFIER||||606|cpo|protein_coding|CODING|FBtr0330276|1|1);INTRON(MODIFIER||…	Free Glucose	0.0415	0.8019	0.0108637
Free Glucose	1-palmitoleoyl-2-oleoyl-glycerol (16:1/18:1)*	52632	0.32645	0.0398	FBgn0045038	2L:7864642-7871432	-0.55587	0.0002	3R_14310902_SNP	0.1026	1.82813e-06	3.269e-06	0.00121951	SiteClass[FBgn0004652|fru|INTRON|0],TranscriptAnnot[INTRON(MODIFIER||||906|fru|protein_coding|CODING|FBtr0083649|1|1);INTRON(MODIFIER||||870|fru|protein_coding|CODING|FBtr0083648|1|1);INTRON(MODIFIER||||695|fru|protein_coding|CODING|FBtr0083640|2|1);INTRON(MODIFIER||||854|fru|protein_coding|CODING|FBtr0083642|2|1);INTRON(MODIFIER||||688|fru|protein_coding|CODING|FBtr0083644|2|1);INTRON(MODIFIER||…	Free Glucose	-0.07409	0.654	0.707782
Free Glucose	3-hydroxypropanoate	1556	-0.34071	0.0314	FBgn0031821	2L:6487342-6488756	-0.61113	<.0001	3R_14521897_SNP	0.175	5.74205e-06	0.0002646	0.000431034	SiteClass[FBgn0085311|CG34282|DOWNSTREAM|393],TranscriptAnnot[DOWNSTREAM(MODIFIER||393||94|CG34282|protein_coding|CODING|FBtr0112478||1);INTERGENIC(MODIFIER||||||||||1)]	Free Glucose	0.03239	0.8448	0.174752
Free Glucose	3-hydroxypropanoate	1556	-0.34071	0.0314	FBgn0040260	2L:16799025-16801584	-0.46235	0.003	3R_14521897_SNP	0.175	5.74205e-06	2.418e-05	0.000431034	SiteClass[FBgn0085311|CG34282|DOWNSTREAM|393],TranscriptAnnot[DOWNSTREAM(MODIFIER||393||94|CG34282|protein_coding|CODING|FBtr0112478||1);INTERGENIC(MODIFIER||||||||||1)]	Free Glucose	0.37834	0.0176	0.174752
Free Glucose	3-hydroxypropanoate	1556	-0.34071	0.0314	FBgn0051272	3R:6582018-6585120	-0.51599	0.0008	3R_14521897_SNP	0.175	5.74205e-06	0.0001681	0.000431034	SiteClass[FBgn0085311|CG34282|DOWNSTREAM|393],TranscriptAnnot[DOWNSTREAM(MODIFIER||393||94|CG34282|protein_coding|CODING|FBtr0112478||1);INTERGENIC(MODIFIER||||||||||1)]	Free Glucose	0.23016	0.1587	0.174752
Free Glucose	3-hydroxypropanoate	1556	-0.34071	0.0314	FBgn0033913	2R:10107403-10118125	-0.4915	0.0015	3R_14521897_SNP	0.175	5.74205e-06	2.103e-05	0.000431034	SiteClass[FBgn0085311|CG34282|DOWNSTREAM|393],TranscriptAnnot[DOWNSTREAM(MODIFIER||393||94|CG34282|protein_coding|CODING|FBtr0112478||1);INTERGENIC(MODIFIER||||||||||1)]	Free Glucose	-0.04332	0.7934	0.174752
Free Glucose	1-palmitoleoyl-2-oleoyl-glycerol (16:1/18:1)*	52632	0.32645	0.0398	FBgn0003249	3R:15906782-15908172	-0.55142	0.0003	3R_14624146_SNP	0.2703	4.46174e-06	5.49e-06	0.00121951	SiteClass[FBgn0038653|CG18208|DOWNSTREAM|856],TranscriptAnnot[DOWNSTREAM(MODIFIER||856||699|CG18208|protein_coding|CODING|FBtr0083677||1);DOWNSTREAM(MODIFIER||856||740|CG18208|protein_coding|CODING|FBtr0330029||1);DOWNSTREAM(MODIFIER||856||670|CG18208|protein_coding|CODING|FBtr0332809||1);INTERGENIC(MODIFIER||||||||||1)]	Free Glucose	-0.36174	0.0236	0.593298
[truncated: 5,952 more rows]

## Sheet: B. Males
Trait	Metabolite	Metabolite ID	Metabolite Trait Correlation Coefficient	Metabolite Trait Correlation P-value	Gene ID	Gene Body	Gene Metabolite Correlation Coefficient	Gene Metabolite Correlation P-value	meQTL	MAF	mQTL P-value	eQTL P-value	eQTL Corrected P-value	eQTL Annotation	Trait	Gene Trait Correlation Coefficient	Gene Trait Correlation P-value	QTL P-value
[truncated: 12,463 more rows]
